# Supplementary material for: Remote asymmetric conjugate addition catalyzed by a bifunctional spiro-pyrrolidine-derived thiourea catalyst
Source: Royal Society of Chemistry journal article supplement (doi:10.1039/d1qo00238d), 2021-01-01
Supplement: d1qo00238d1.pdf [file d1qo00238d1.pdf]

## Supporting Information

### Remote Asymmetric Conjugate Addition Catalyzed by Bifunctional

#### Spiro-Pyrrolidine-Derived Thiourea Catalyst

Ming-Hui Xu,<sup>a</sup> Yong-Hai Yuan,<sup>a</sup> Dong-Dong Liang,<sup>a</sup> Xiao-Ming Zhang,<sup>\*a</sup> Fu-Min Zhang,<sup>a</sup>  
Yong-Qiang Tu,<sup>\*ab</sup> Ai-Jun Ma,<sup>c</sup> Kun Zhang,<sup>c</sup> Jin-Bao Peng<sup>c</sup>

<sup>a</sup>*State Key Laboratory of Applied Organic Chemistry and College of Chemistry and Chemical Engineering, Lanzhou University, Lanzhou 730000, P. R. China*

<sup>b</sup>*School of Chemistry and Chemical Engineering, Frontiers Science Center for Transformative Molecules, Shanghai Jiao Tong University, Shanghai 200240, P. R. China*

<sup>c</sup>*School of Biotechnology and Health Science, Wuyi University, Jiangmen 529020, P. R. China*

\*E-mail: tuyq@lzu.edu.cn, tuyq@sjtu.edu.cn

## Table of Contents

|                                                                                                                                                      |      |
|------------------------------------------------------------------------------------------------------------------------------------------------------|------|
| 1. General information.....                                                                                                                          | S1   |
| 2. The preparation of substrates and catalysts.....                                                                                                  | S1   |
| 3. General procedure for the remote asymmetric conjugate addition of<br>5-benzylfurfurals with $\beta,\gamma$ -unsaturated $\alpha$ -ketoesters..... | S14  |
| 4. Gram-scale reaction of <b>3a</b> .....                                                                                                            | S34  |
| 5. Plausible reaction mechanism.....                                                                                                                 | S34  |
| 6. Product derivatization.....                                                                                                                       | S35  |
| 7. Single crystal X-ray diffraction data for <b>4b</b> , <b>cat. 4</b> , and <b>7</b> .....                                                          | S38  |
| 8. References.....                                                                                                                                   | S41  |
| 9. Copies of NMR spectra.....                                                                                                                        | S42  |
| 10. HPLC or UPC <sup>2</sup> spectra copies of compounds.....                                                                                        | S261 |



## 1. General information

All reactions requiring anhydrous conditions were carried out under argon atmosphere using oven-dried glassware (120 °C), which was cooled under argon. All solvents were purified and dried by standard techniques, and distilled prior to use. All reactions under standard conditions were monitored by thin-layer chromatography (TLC) on gel F<sub>254</sub> plates. Silica gel (200-300 mesh) and petroleum ether (b.p. 60-90 °C), ethyl acetate are used for product purification by flash column chromatography. <sup>1</sup>H NMR spectra were acquired on a Bruker 400 or 600 MHz; <sup>13</sup>C NMR spectra were acquired at 100 or 150 MHz and <sup>19</sup>F NMR spectra were acquired at 376 MHz. Chemical shifts (δ) were reported in ppm relative to residual solvent signals (CDCl<sub>3</sub>: 7.26 ppm for <sup>1</sup>H NMR; 77.0 ppm for <sup>13</sup>C NMR. (CD<sub>3</sub>)<sub>2</sub>SO: 2.50 ppm for <sup>1</sup>H NMR; 39.5 ppm for <sup>13</sup>C NMR.) The following abbreviations are used to indicate the multiplicity in NMR spectra: s, singlet; d, doublet; t, triplet; q, quartet; dd, double of doublets; td, triplet of doublets; m, multiplet. High-resolution mass spectral analysis (HRMS) data were determined on an APEXII 47e FT-ICR spectrometer by means of the ESI technique. IR spectra were recorded on a fourier transform infrared spectrometer. Enantioselectivities were recorded on Waters HPLC using Chiralpak columns or Waters UPC<sup>2</sup>. Optical rotations were detected on RUDOLPH A21202-J APTV/GW. Melting points were recorded on a melting point apparatus and uncorrected.

## 2. The preparation of substrates and catalysts

### 2.1 The substrates of 5-benzylfurfurals.

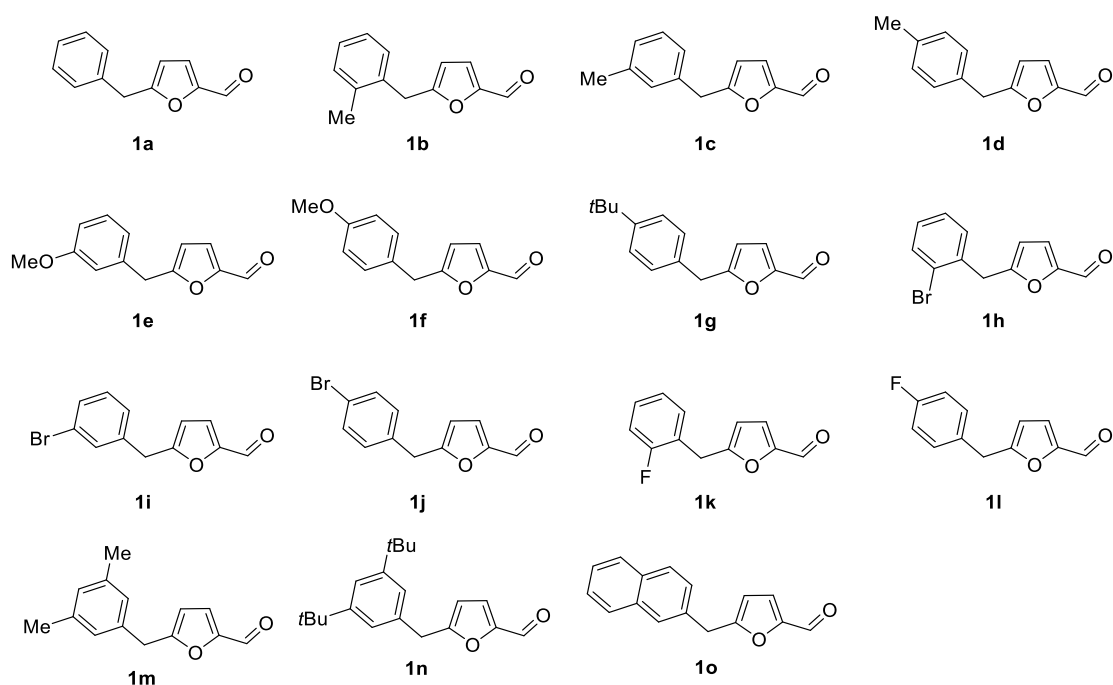

The substrates **1a-1o** were prepared according to the reported literature procedure<sup>1</sup>. Analytical data (<sup>1</sup>H NMR, <sup>13</sup>C NMR) matches with the literature. Substrates **1a-1g** and **1m-1o** were prepared according procedure A, and **1h-1l** were prepared according to procedure B.

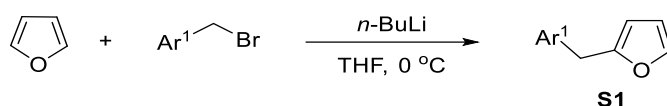

**Procedure A:**

To a solution of furan (20 mmol, 2.0 equiv) in dry THF (15 mL) was added *n*-BuLi (15 mmol, 1.5 equiv, 2.5 M in hexane) dropwise at 0 °C under argon atmosphere. After the addition was completed, the mixture was allowed to warm to room temperature and stirred for 30 min. The mixture was then cooled down to 0 °C and the solution of benzyl bromide (10 mmol, 1.0 equiv) in dry THF (10 mL) was added dropwise. After full addition, the reaction mixture was warmed up to room temperature and stirred overnight. The reaction was quenched with water (10 mL), and the resulting mixture was extracted with AcOEt (15 mL×3). The organic layers were combined, washed with brine (20 mL), dried over Na<sub>2</sub>SO<sub>4</sub> and evaporated under reduced pressure. The crude product was purified by flash column chromatography using hexane to give the desired product **S1**.

**Procedure B:**

To a solution of furan (20 mmol, 2.0 equiv) in dry THF (15 mL) was added *n*-BuLi (15 mmol, 1.5 equiv, 2.5 M in hexane) dropwise at 0 °C under argon atmosphere. After the addition was complete, the mixture was allowed to warm to room temperature and stirred for 30 min. The mixture was then cooled down to 0 °C and the solution of benzyl bromide (10 mmol, 1.0 equiv) and TEMPO (15 mmol, 1.5 equiv) in dry THF (10 mL) was added dropwise. After full addition, the reaction mixture was warmed up to room temperature and stirred overnight. The reaction was quenched with water (10 mL), and the resulting mixture was extracted with AcOEt (15 mL×3). The organic layers were combined, washed with brine (20 mL), dried over Na<sub>2</sub>SO<sub>4</sub> and evaporated under reduced pressure. The crude product was purified by flash column chromatography using hexane to give the desired product **S1**.

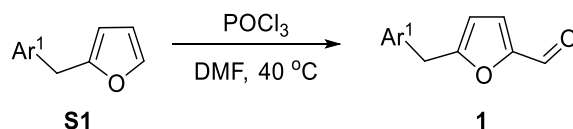

To a dry DMF (13 mmol, 1.3 equiv) was added POCl<sub>3</sub> (11 mmol, 1.1 equiv) dropwise at 0 °C under argon atmosphere and the mixture was stirred at 40 °C for 1 h. Then the solution of 2-benzylfuran (10 mmol, 1.0 equiv) in anhydrous DMF (1.5 mL) was added dropwise and the reaction mixture was stirred until 2-benzylfuran disappeared via TLC detection. The reaction was quenched with water (10 mL). CH<sub>2</sub>Cl<sub>2</sub> was added and the resulting mixture was washed with 1M NaOH. The organic layer was washed with brine, dried over Na<sub>2</sub>SO<sub>4</sub> and evaporated under reduced pressure. The residue was purified by flash column chromatography using ethyl acetate/hexane to afford compound **1**.

**5-benzylfuran-2-carbaldehyde (1a)**

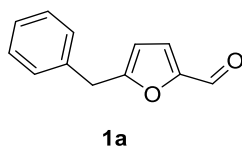

The compound **1a** was prepared using the general procedure A<sup>1a</sup>. <sup>1</sup>H NMR (400 MHz, CDCl<sub>3</sub>) δ 9.51 (s, 1H), 7.35–7.28 (m, 2H), 7.27–7.23 (m, 3H), 7.14 (d, *J* = 3.5 Hz, 1H), 6.17 (d, *J* = 3.5

Hz, 1H), 4.04 (s, 2H).  $^{13}\text{C}$  NMR (100 MHz,  $\text{CDCl}_3$ )  $\delta$  177.0, 161.9, 152.0, 136.0, 128.7, 128.6, 126.9, 123.1, 109.6, 34.7.

5-(2-methylbenzyl)furan-2-carbaldehyde (**1b**)

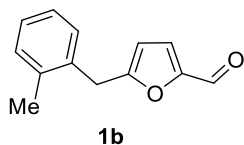

The compound **1b** was prepared using the general procedure A. Analytical data matches with the literature<sup>1b</sup>.  $^1\text{H}$  NMR (400 MHz,  $\text{CDCl}_3$ )  $\delta$  9.50 (s, 1H), 7.18–7.12 (m, 5H), 6.04 (d,  $J = 3.5$  Hz, 1H), 4.02 (s, 2H), 2.27 (s, 3H).  $^{13}\text{C}$  NMR (100 MHz,  $\text{CDCl}_3$ )  $\delta$  176.9, 161.6, 151.9, 136.3, 134.2, 130.3, 129.6, 127.2, 126.2, 123.1, 109.6, 32.4, 19.2.

5-(3-methylbenzyl)furan-2-carbaldehyde (**1c**)

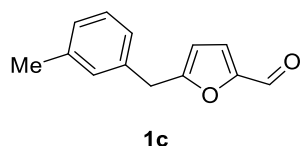

The compound **1c** was prepared using the general procedure A<sup>1c</sup>.  $^1\text{H}$  NMR (400 MHz,  $\text{CDCl}_3$ )  $\delta$  9.50 (s, 1H), 7.23–7.16 (m, 1H), 7.14 (d,  $J = 3.5$  Hz, 1H), 7.09–7.00 (m, 3H), 6.17 (d,  $J = 3.5$  Hz, 1H), 3.99 (s, 2H), 2.32 (s, 3H).  $^{13}\text{C}$  NMR (100 MHz,  $\text{CDCl}_3$ )  $\delta$  177.0, 162.0, 152.0, 138.2, 135.9, 129.5, 128.5, 127.6, 125.7, 123.1, 109.6, 34.6, 21.2.

5-(4-methylbenzyl)furan-2-carbaldehyde (**1d**)

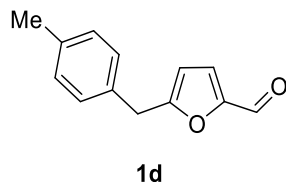

The compound **1d** was prepared using the general procedure A<sup>1c</sup>.  $^1\text{H}$  NMR (400 MHz,  $\text{CDCl}_3$ )  $\delta$  9.48 (s, 1H), 7.12 (d,  $J = 5.0$  Hz, 5H), 6.15 (d,  $J = 3.5$  Hz, 1H), 3.97 (s, 2H), 2.30 (s, 3H).  $^{13}\text{C}$  NMR (100 MHz,  $\text{CDCl}_3$ )  $\delta$  176.9, 162.1, 151.9, 136.4, 132.8, 129.2, 128.5, 123.1, 109.4, 34.1, 20.8.

5-(3-methoxybenzyl)furan-2-carbaldehyde (**1e**)

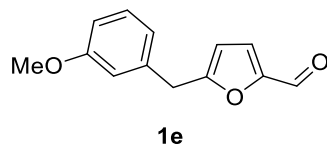

The compound **1e** was prepared using the general procedure A<sup>1c</sup>.  $^1\text{H}$  NMR (400 MHz,  $\text{CDCl}_3$ )  $\delta$  9.51 (s, 1H), 7.23 (td,  $J = 7.5, 1.3$  Hz, 1H), 7.15 (d,  $J = 3.5$  Hz, 1H), 6.87–6.74 (m, 3H), 6.20 (d,  $J = 3.5$  Hz, 1H), 4.01 (s, 2H), 3.77 (s, 3H).  $^{13}\text{C}$  NMR (100 MHz,  $\text{CDCl}_3$ )  $\delta$  177.0, 161.6, 159.7, 152.0, 137.4, 129.6, 123.1, 121.0, 114.5, 112.1, 109.7, 55.0, 34.6.

5-(4-methoxybenzyl)furan-2-carbaldehyde (**1f**)

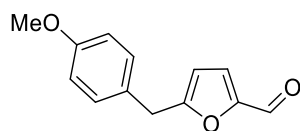

**1f**

The compound **1f** was prepared using the general procedure A<sup>1c</sup>. <sup>1</sup>H NMR (400 MHz, CDCl<sub>3</sub>) δ 9.48 (s, 1H), 7.14 (t, *J* = 6.3 Hz, 3H), 6.91–6.75 (m, 2H), 6.14 (d, *J* = 2.9 Hz, 1H), 3.96 (s, 2H), 3.75 (d, *J* = 1.8 Hz, 3H). <sup>13</sup>C NMR (100 MHz, CDCl<sub>3</sub>) δ 176.9, 162.3, 158.4, 151.9, 129.7, 127.9, 123.1, 113.9, 109.3, 55.0, 33.7.

5-(4-(tert-butyl)benzyl)furan-2-carbaldehyde (**1g**)

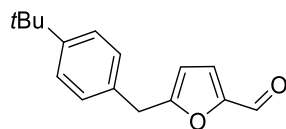

**1g**

The compound **1g** was prepared using the general procedure A<sup>1c</sup>. <sup>1</sup>H NMR (400 MHz, CDCl<sub>3</sub>) δ 9.51 (s, 1H), 7.39–7.31 (m, 2H), 7.18 (d, *J* = 8.3 Hz, 2H), 7.14 (d, *J* = 3.5 Hz, 1H), 6.19 (d, *J* = 3.5 Hz, 1H), 4.01 (s, 2H), 1.30 (s, 9H). <sup>13</sup>C NMR (100 MHz, CDCl<sub>3</sub>) δ 177.0, 162.1, 152.0, 149.8, 132.9, 128.4, 125.5, 123.1, 109.6, 34.3, 34.2, 31.2.

5-(2-bromobenzyl)furan-2-carbaldehyde (**1h**)

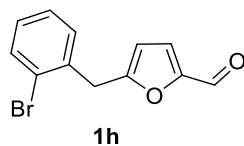

**1h**

The compound **1h** was prepared using the general procedure B<sup>1a</sup>. <sup>1</sup>H NMR (400 MHz, CDCl<sub>3</sub>) δ 9.52 (s, 1H), 7.56 (d, *J* = 7.8 Hz, 1H), 7.31–7.21 (m, 2H), 7.21–7.07 (m, 2H), 6.19 (d, *J* = 3.5 Hz, 1H), 4.18 (s, 2H). <sup>13</sup>C NMR (100 MHz, CDCl<sub>3</sub>) δ 177.0, 160.0, 152.0, 135.5, 132.8, 130.8, 128.7, 127.7, 124.3, 123.1, 110.2, 35.0.

5-(3-bromobenzyl)furan-2-carbaldehyde (**1i**)

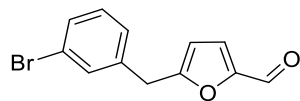

**1i**

The compound **1i** was prepared using the general procedure B<sup>1a</sup>. <sup>1</sup>H NMR (400 MHz, CDCl<sub>3</sub>) δ 9.54 (s, 1H), 7.46–7.33 (m, 2H), 7.25–7.11 (m, 3H), 6.22 (d, *J* = 3.5 Hz, 1H), 4.02 (s, 2H). <sup>13</sup>C NMR (100 MHz, CDCl<sub>3</sub>) δ 177.1, 160.7, 152.2, 138.3, 131.8, 130.3, 130.2, 127.5, 123.0, 122.6, 110.0, 34.3.

5-(4-bromobenzyl)furan-2-carbaldehyde (**1j**)

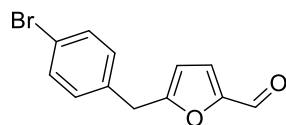

**1j**

The compound **1j** was prepared using the general procedure B<sup>1a</sup>. <sup>1</sup>H NMR (400 MHz, CDCl<sub>3</sub>) δ 9.52 (s, 1H), 7.48–7.39 (m, 2H), 7.17 (d, *J* = 3.5 Hz, 1H), 7.12 (d, *J* = 8.3 Hz, 2H), 6.20 (d, *J* = 3.5 Hz, 1H), 4.00 (s, 2H). <sup>13</sup>C NMR (100 MHz, CDCl<sub>3</sub>) δ 177.01, 160.9, 152.1, 135.0, 131.7, 130.4, 123.1, 120.8, 109.8, 34.1.

5-(2-fluorobenzyl)furan-2-carbaldehyde (**1k**)

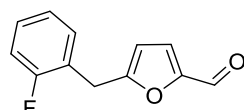

**1k**

The compound **1k** was prepared using the general procedure A<sup>1c</sup>. <sup>1</sup>H NMR (400 MHz, CDCl<sub>3</sub>) δ 9.54 (s, 1H), 7.31–7.22 (m, 2H), 7.17 (d, *J* = 3.6 Hz, 1H), 7.15–7.04 (m, 2H), 6.22 (d, *J* = 3.5 Hz, 1H), 4.10 (s, 2H). <sup>13</sup>C NMR (100 MHz, CDCl<sub>3</sub>) δ 177.2, 162.4, 160.5, 159.6, 152.2, 131.0 (d, *J* = 3.9 Hz), 129.1 (d, *J* = 8.1 Hz), 124.4 (d, *J* = 3.7 Hz), 123.2 (d, *J* = 15.6 Hz), 115.7, 115.4, 109.8, 28.0. <sup>19</sup>F NMR (376 MHz, CDCl<sub>3</sub>) δ -117.8.

5-(4-fluorobenzyl)furan-2-carbaldehyde (**1l**)

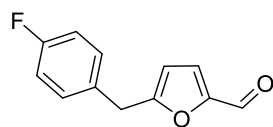

**1l**

The compound **1l** was prepared using the general procedure A<sup>1c</sup>. <sup>1</sup>H NMR (400 MHz, CDCl<sub>3</sub>) δ 9.55 (s, 1H), 7.22 (dd, *J* = 8.6, 5.3 Hz, 2H), 7.17 (d, *J* = 3.5 Hz, 1H), 7.02 (t, *J* = 8.7 Hz, 2H), 6.18 (d, *J* = 3.5 Hz, 1H), 4.04 (s, 2H). <sup>13</sup>C NMR (100 MHz, CDCl<sub>3</sub>) δ 177.1, 163.0, 161.6, 160.6, 152.2, 131.8, 130.3 (d, *J* = 8.0 Hz), 123.1, 115.5 (d, *J* = 18.5 Hz), 109.7, 34.0. <sup>19</sup>F NMR (376 MHz, CDCl<sub>3</sub>) δ -115.7.

5-(3,5-dimethylbenzyl)furan-2-carbaldehyde (**1m**)

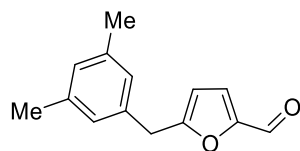

**1m**

The compound **1m** was prepared using the general procedure A. <sup>1</sup>H NMR (400 MHz, CDCl<sub>3</sub>) δ 9.54 (s, 1H), 7.17 (d, *J* = 3.5 Hz, 1H), 6.91 (s, 1H), 6.88 (s, 2H), 6.21 (d, *J* = 3.5 Hz, 1H), 3.99 (s, 2H), 2.31 (s, 6H). <sup>13</sup>C NMR (100 MHz, CDCl<sub>3</sub>) δ 177.0, 162.2, 152.0, 138.1, 135.8, 128.5, 126.5, 123.0, 109.6, 34.5, 21.1.

5-(3,5-di-tert-butylbenzyl)furan-2-carbaldehyde (**1n**)

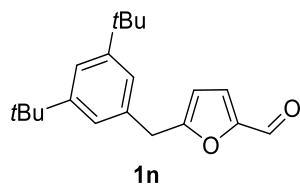

The compound **1n** was prepared using the general procedure A.  $^1\text{H NMR}$  (400 MHz,  $\text{CDCl}_3$ )  $\delta$  9.55 (s, 1H), 7.33 (s, 1H), 7.16 (d,  $J = 3.4$  Hz, 1H), 7.09 (d,  $J = 0.9$  Hz, 2H), 6.18 (d,  $J = 3.4$  Hz, 1H), 4.05 (s, 2H), 1.31 (s, 18H).  $^{13}\text{C NMR}$  (100 MHz,  $\text{CDCl}_3$ )  $\delta$  177.2, 162.7, 152.1, 151.2, 135.1, 123.1, 121.0, 109.7, 35.3, 34.8, 31.4.

#### 5-(naphthalen-2-ylmethyl)furan-2-carbaldehyde (**1o**)

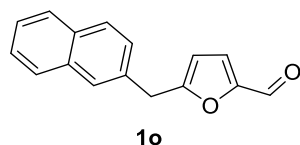

The compound **1o** was prepared using the general procedure A<sup>1c</sup>.  $^1\text{H NMR}$  (400 MHz,  $\text{CDCl}_3$ )  $\delta$  9.50 (s, 1H), 7.84–7.72 (m, 3H), 7.66 (s, 1H), 7.49–7.40 (m, 2H), 7.33 (dd,  $J = 8.4, 1.7$  Hz, 1H), 7.11 (d,  $J = 3.5$  Hz, 1H), 6.16 (d,  $J = 3.5$  Hz, 1H), 4.17 (s, 2H).  $^{13}\text{C NMR}$  (100 MHz,  $\text{CDCl}_3$ )  $\delta$  177.1, 161.8, 152.1, 133.4, 133.4, 132.3, 128.4, 127.6, 127.5, 127.4, 126.9, 126.2, 125.8, 123.0, 109.8, 34.9.

## 2.2 General procedure for the preparation of $\beta,\gamma$ -unsaturated $\alpha$ -ketoesters.

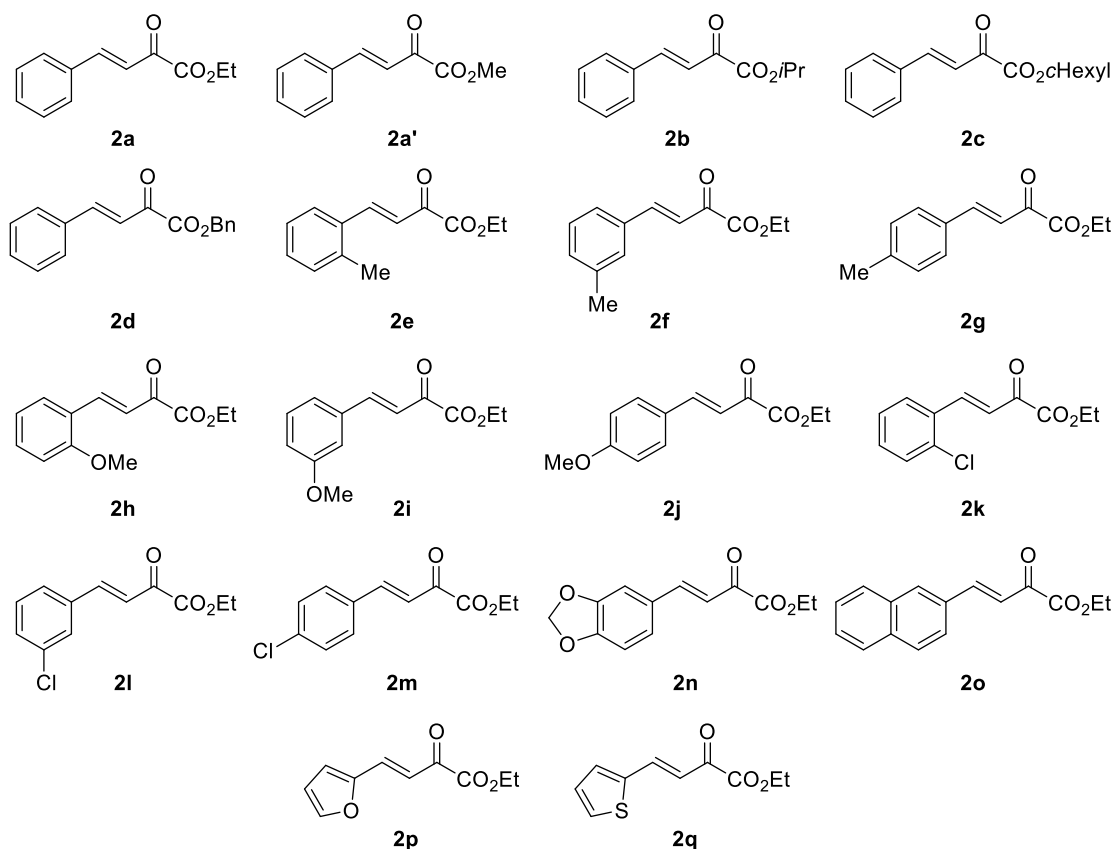

The substrates **2a-2q** were prepared according to the reported literature procedure. Analytical data ( $^1\text{H NMR}$ ,  $^{13}\text{C NMR}$ ) matches with the literature<sup>2</sup>.

Procedure A:

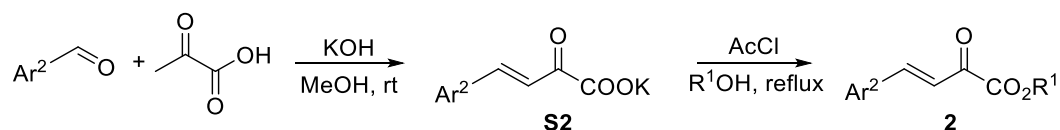

A mixture of benzaldehyde (10 mmol, 1.0 equiv), and pyruvic acid (10 mol, 1.0 equiv) in MeOH (1 mL) was added KOH (1.5 equiv, 15 mol in 5 mL MeOH) dropwise at 0 °C under argon atmosphere. The solution was stirred at room temperature overnight. The yellow suspension was filtered and then washed with ice MeOH and ethyl ether giving **S2** as yellow solid. **S2** was added to the solution of AcCl (12 mmol, 1.2 equiv) in EtOH (6 mL) at 0 °C. The solution was stirred for 6 hours at reflux temperature, and then cooled to room temperature. The solution was quenched with  $\text{NaHCO}_3$  (10 mL), extracted by DCM (10 mL $\times$ 3). The combined organic layer was washed with brine (20 mL), dried over anhydrous  $\text{Na}_2\text{SO}_4$ , and evaporated under reduced pressure. The residue was purified by flash chromatography on silica gel to give the product **2**.

Procedure B:

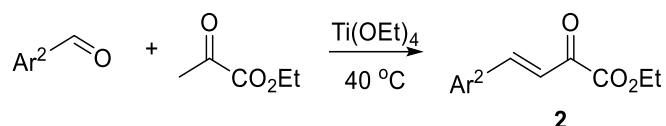

A mixture of benzaldehyde (5 mmol, 1.0 equiv), and ethyl pyruvate (6 mmol, 1.2 equiv) in toluene (25 mL) was added  $\text{Ti}(\text{OEt})_4$  (6 mmol, 1.2 equiv) dropwise at rt under argon atmosphere. The solution was stirred at 40 °C until benzaldehyde disappeared via TLC detection. The solution was quenched with water (1 mL) and stirred for 30 min. The mixture was dried over anhydrous  $\text{Na}_2\text{SO}_4$ , filtrated with celite, and evaporated under reduced pressure. The residue was purified by flash chromatography on silica gel (petroleum ether:EtOAc = 20:1) to give **2**.

ethyl (*E*)-2-oxo-4-phenylbut-3-enoate (**2a**)

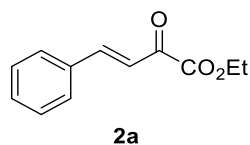

The compound **2a** was prepared using the general procedure B<sup>2b</sup>.  $^1\text{H NMR}$  (400 MHz,  $\text{CDCl}_3$ )  $\delta$  7.84 (d,  $J$  = 16.1 Hz, 1H), 7.61 (dd,  $J$  = 7.7, 1.7 Hz, 2H), 7.47–7.38 (m, 3H), 7.36 (t,  $J$  = 8.9 Hz, 1H), 4.38 (q,  $J$  = 7.1 Hz, 2H), 1.39 (t,  $J$  = 7.2 Hz, 3H).  $^{13}\text{C NMR}$  (100 MHz,  $\text{CDCl}_3$ )  $\delta$  182.7, 162.1, 148.3, 133.9, 131.5, 129.0, 128.9, 120.4, 62.4, 14.0.

methyl (*E*)-2-oxo-4-phenylbut-3-enoate (**2a'**)

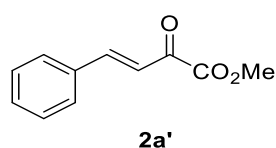

The compound **2a'** was prepared using the general procedure A<sup>2a</sup>.  $^1\text{H NMR}$  (400 MHz,

CDCl<sub>3</sub>)  $\delta$  7.83 (d,  $J$  = 16.1 Hz, 1H), 7.60 (dd,  $J$  = 7.7, 1.3 Hz, 2H), 7.47–7.31 (m, 4H), 3.91 (s, 3H). <sup>13</sup>C NMR (100 MHz, CDCl<sub>3</sub>)  $\delta$  182.1, 162.2, 148.2, 133.6, 131.4, 128.8, 128.8, 120.1, 52.7.

isopropyl (*E*)-2-oxo-4-phenylbut-3-enoate (**2b**)

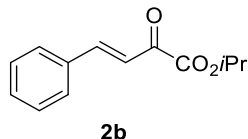

The compound **2b** was prepared using the general procedure B<sup>2b</sup>. <sup>1</sup>H NMR (400 MHz, CDCl<sub>3</sub>)  $\delta$  7.83 (d,  $J$  = 16.2 Hz, 1H), 7.62 (dd,  $J$  = 7.7, 1.6 Hz, 2H), 7.49–7.31 (m, 4H), 5.26–5.19 (m, 1H), 1.39 (d,  $J$  = 6.3 Hz, 6H). <sup>13</sup>C NMR (100 MHz, CDCl<sub>3</sub>)  $\delta$  183.1, 161.7, 148.0, 133.8, 131.4, 128.9, 128.8, 120.5, 70.5, 21.5.

cyclohexyl (*E*)-2-oxo-4-phenylbut-3-enoate (**2c**)

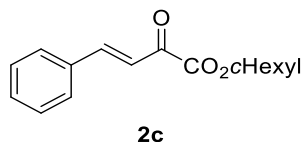

The compound **2c** was prepared using the general procedure A. Analytical data matches with the literature<sup>2c</sup>. <sup>1</sup>H NMR (400 MHz, (CD<sub>3</sub>)<sub>2</sub>SO)  $\delta$  7.81 (dd,  $J$  = 7.7, 1.5 Hz, 2H), 7.76 (d,  $J$  = 16.3 Hz, 1H), 7.54–7.43 (m, 3H), 7.34–7.26 (m, 1H), 4.99–4.86 (m, 1H), 2.00–1.83 (m, 2H), 1.74 – 1.67 (m, 2H), 1.57 – 1.47 (m, 3H), 1.43 – 1.33 (m, 2H), 1.33–1.14 (m, 2H). <sup>13</sup>C NMR (100 MHz, (CD<sub>3</sub>)<sub>2</sub>SO)  $\delta$  184.4, 161.9, 148.0, 133.7, 131.7, 129.1, 129.1, 121.4, 74.5, 30.8, 24.7, 23.1.

benzyl (*E*)-2-oxo-4-phenylbut-3-enoate (**2d**)

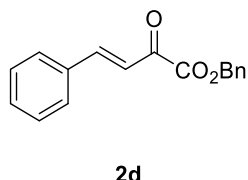

The compound **2d** was prepared using the general procedure A. Analytical data matches with the literature<sup>2c</sup>. <sup>1</sup>H NMR (400 MHz, (CD<sub>3</sub>)<sub>2</sub>SO)  $\delta$  7.85–7.74 (m, 3H), 7.54–7.44 (m, 5H), 7.43–7.37 (m, 3H), 7.34 (d,  $J$  = 16.3 Hz, 1H), 5.36 (s, 2H). <sup>13</sup>C NMR (100 MHz, (CD<sub>3</sub>)<sub>2</sub>SO)  $\delta$  183.7, 162.2, 148.2, 135.0, 133.7, 131.7, 129.2, 129.1, 128.6, 128.5, 128.5, 121.3, 67.3.

ethyl (*E*)-2-oxo-4-(*o*-tolyl)but-3-enoate (**2e**)

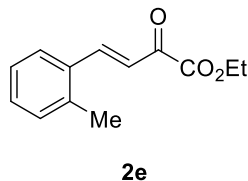

The compound **2e** was prepared using the general procedure B<sup>2b</sup>. <sup>1</sup>H NMR (600 MHz, CDCl<sub>3</sub>)  $\delta$  8.17 (d,  $J$  = 16.0 Hz, 1H), 7.68 (d,  $J$  = 7.8 Hz, 1H), 7.33 (t,  $J$  = 7.5 Hz, 1H), 7.29 (d,  $J$  = 16.0 Hz, 1H), 7.26–7.21 (m, 2H), 4.40 (q,  $J$  = 7.1 Hz, 2H), 2.47 (s, 3H), 1.41 (t,  $J$  = 7.1 Hz, 3H). <sup>13</sup>C



**NMR** (150 MHz, CDCl<sub>3</sub>) δ 182.8, 162.2, 145.7, 139.0, 132.8, 131.3, 131.0, 126.7, 126.4, 121.4, 62.4, 19.7, 14.0.

ethyl (*E*)-2-oxo-4-(*m*-tolyl)but-3-enoate (**2f**)

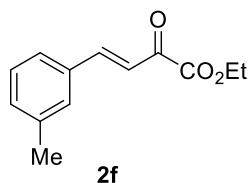

The compound **2f** was prepared using the general procedure B<sup>2b</sup>. **<sup>1</sup>H NMR** (400 MHz, CDCl<sub>3</sub>) δ 7.84 (d, *J* = 16.1 Hz, 1H), 7.44 (d, *J* = 7.4 Hz, 2H), 7.35 (d, *J* = 16.1 Hz, 1H), 7.32–7.24 (m, 2H), 4.39 (q, *J* = 7.1 Hz, 2H), 2.38 (s, 3H), 1.41 (t, *J* = 7.1 Hz, 3H). **<sup>13</sup>C NMR** (100 MHz, CDCl<sub>3</sub>) δ 182.9, 162.3, 148.7, 138.8, 134.0, 132.5, 129.6, 129.0, 126.3, 120.3, 62.5, 21.3, 14.1.

ethyl (*E*)-2-oxo-4-(*p*-tolyl)but-3-enoate (**2g**)

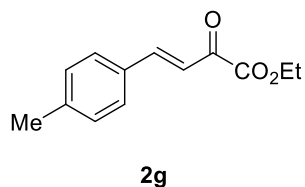

The compound **2g** was prepared using the general procedure B<sup>2b</sup>. **<sup>1</sup>H NMR** (400 MHz, (CD<sub>3</sub>)<sub>2</sub>SO) δ 7.75 (d, *J* = 16.3 Hz, 1H), 7.69 (d, *J* = 8.0 Hz, 2H), 7.33–7.23 (m, 3H), 4.33 (q, *J* = 7.1 Hz, 2H), 2.34 (s, 3H), 1.32 (t, *J* = 7.1 Hz, 3H). **<sup>13</sup>C NMR** (100 MHz, (CD<sub>3</sub>)<sub>2</sub>SO) δ 183.9, 162.5, 148.1, 142.0, 131.0, 129.7, 129.2, 120.2, 61.9, 21.1, 13.8.

ethyl (*E*)-4-(2-methoxyphenyl)-2-oxobut-3-enoate (**2h**)

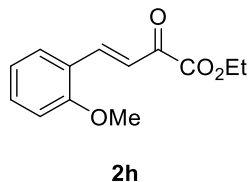

The compound **2h** was prepared using the general procedure A. Analytical data matches with the literature<sup>2d</sup>. **<sup>1</sup>H NMR** (600 MHz, (CD<sub>3</sub>)<sub>2</sub>SO) δ 7.99 (d, *J* = 16.4 Hz, 1H), 7.80 (dd, *J* = 7.7, 1.6 Hz, 1H), 7.52–7.48 (m, 1H), 7.35 (d, *J* = 16.4 Hz, 1H), 7.14 (d, *J* = 8.0 Hz, 1H), 7.03 (t, *J* = 7.4 Hz, 1H), 4.32 (q, *J* = 7.1 Hz, 2H), 3.90 (s, 3H), 1.31 (t, *J* = 7.1 Hz, 3H). **<sup>13</sup>C NMR** (150 MHz, (CD<sub>3</sub>)<sub>2</sub>SO) δ 184.0, 162.5, 158.7, 142.7, 133.6, 129.4, 121.9, 121.3, 120.9, 112.0, 61.9, 55.8, 13.9.

ethyl (*E*)-4-(3-methoxyphenyl)-2-oxobut-3-enoate (**2i**)

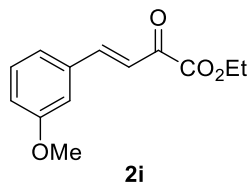

The compound **2i** was prepared using the general procedure A. Analytical data matches with the literature<sup>2d</sup>. **<sup>1</sup>H NMR** (400 MHz, CDCl<sub>3</sub>) δ 7.80 (dd, *J* = 16.1, 6.1 Hz, 1H), 7.37–7.29 (m,

1H), 7.21 (d,  $J = 5.9$  Hz, 1H), 7.12 (s, 1H), 6.99 (dd,  $J = 5.7, 2.4$  Hz, 1H), 4.39 (dd,  $J = 7.1, 4.7$  Hz, 2H), 3.83 (d,  $J = 5.5$  Hz, 3H), 1.43–1.38 (m, 3H).  $^{13}\text{C}$  NMR (100 MHz,  $\text{CDCl}_3$ )  $\delta$  182.6, 162.0, 159.8, 148.2, 135.1, 129.9, 121.7, 120.5, 117.5, 113.3, 62.3, 55.2, 13.9.

ethyl (E)-4-(4-methoxyphenyl)-2-oxobut-3-enoate (**2j**)

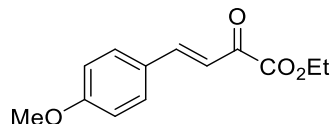

**2j**

The compound **2j** was prepared using the general procedure B<sup>2b</sup>.  $^1\text{H}$  NMR (400 MHz,  $\text{CDCl}_3$ )  $\delta$  7.76 (d,  $J = 16.0$  Hz, 1H), 7.54 (d,  $J = 8.8$  Hz, 2H), 7.20 (d,  $J = 16.0$  Hz, 1H), 6.90 (d,  $J = 8.8$  Hz, 2H), 4.37 (q,  $J = 7.1$  Hz, 2H), 3.81 (s, 3H), 1.39 (t,  $J = 7.2$  Hz, 3H).  $^{13}\text{C}$  NMR (100 MHz,  $\text{CDCl}_3$ )  $\delta$  182.2, 162.1, 162.0, 147.7, 130.6, 126.3, 117.7, 114.1, 61.8, 54.9, 13.6.

ethyl (E)-4-(2-chlorophenyl)-2-oxobut-3-enoate (**2k**)

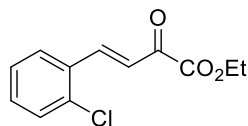

**2k**

The compound **2k** was prepared using the general procedure B<sup>2b</sup>.  $^1\text{H}$  NMR (600 MHz,  $(\text{CD}_3)_2\text{SO}$ )  $\delta$  8.08–8.01 (m, 2H), 7.58 (dd,  $J = 8.0, 1.1$  Hz, 1H), 7.53 (td,  $J = 7.7, 1.6$  Hz, 1H), 7.48–7.40 (m, 2H), 4.36 (q,  $J = 7.1$  Hz, 2H), 1.36 (t,  $J = 7.1$  Hz, 3H).  $^{13}\text{C}$  NMR (150 MHz,  $(\text{CD}_3)_2\text{SO}$ )  $\delta$  183.2, 161.8, 141.9, 134.8, 132.9, 131.4, 130.2, 128.6, 127.9, 123.9, 62.1, 13.9.

ethyl (E)-4-(3-chlorophenyl)-2-oxobut-3-enoate (**2l**)

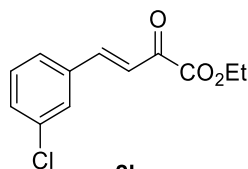

**2l**

The compound **2l** was prepared using the general procedure B<sup>2b</sup>.  $^1\text{H}$  NMR (400 MHz,  $(\text{CD}_3)_2\text{SO}$ )  $\delta$  7.91 (s, 1H), 7.80–7.71 (m, 2H), 7.55–7.44 (m, 2H), 7.39 (d,  $J = 16.3$  Hz, 1H), 4.32 (q,  $J = 7.1$  Hz, 2H), 1.31 (t,  $J = 7.1$  Hz, 3H).  $^{13}\text{C}$  NMR (100 MHz,  $(\text{CD}_3)_2\text{SO}$ )  $\delta$  183.9, 162.2, 146.1, 136.0, 134.0, 131.1, 130.9, 128.7, 127.7, 122.8, 62.1, 13.9.

ethyl (E)-4-(4-chlorophenyl)-2-oxobut-3-enoate (**2m**)

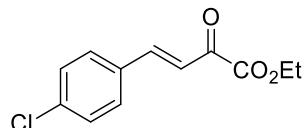

**2m**

The compound **2m** was prepared using the general procedure A<sup>2a</sup>.  $^1\text{H}$  NMR (400 MHz,  $\text{CDCl}_3$ )  $\delta$  7.78 (d,  $J = 16.1$  Hz, 1H), 7.56 (d,  $J = 8.5$  Hz, 2H), 7.36 (dd,  $J = 16.0, 12.3$  Hz, 3H), 4.39 (q,  $J = 7.1$  Hz, 2H), 1.41 (t,  $J = 7.2$  Hz, 3H).  $^{13}\text{C}$  NMR (100 MHz,  $\text{CDCl}_3$ )  $\delta$  182.2, 161.7,

146.4, 137.3, 132.3, 129.9, 129.1, 120.6, 62.4, 13.8.

ethyl (*E*)-4-(benzo[*d*][1,3]dioxol-5-yl)-2-oxobut-3-enoate (**2n**)

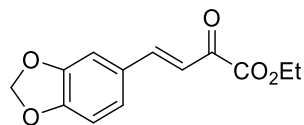

**2n**

The compound **2n** was prepared using the general procedure A<sup>2c</sup>. <sup>1</sup>H NMR (400 MHz, CDCl<sub>3</sub>) δ 7.77 (d, *J* = 16.0 Hz, 1H), 7.16 (dd, *J* = 23.6, 11.6 Hz, 3H), 6.85 (d, *J* = 8.5 Hz, 1H), 6.04 (s, 2H), 4.39 (q, *J* = 7.1 Hz, 2H), 1.41 (t, *J* = 7.1 Hz, 3H). <sup>13</sup>C NMR (100 MHz, CDCl<sub>3</sub>) δ 182.5, 162.3, 150.9, 148.5, 148.2, 128.6, 126.5, 118.5, 108.7, 106.9, 101.8, 62.4, 14.0.

ethyl (*E*)-4-(naphthalen-2-yl)-2-oxobut-3-enoate (**2o**)

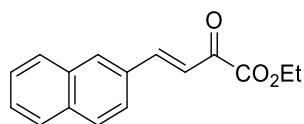

**2o**

The compound **2o** was prepared using the general procedure B<sup>2b</sup>. <sup>1</sup>H NMR (600 MHz, CDCl<sub>3</sub>) δ 8.02 (d, *J* = 16.5 Hz, 2H), 7.90–7.82 (m, 3H), 7.75 (dd, *J* = 8.6, 1.4 Hz, 1H), 7.59–7.51 (m, 2H), 7.47 (d, *J* = 16.0 Hz, 1H), 4.42 (q, *J* = 7.1 Hz, 2H), 1.43 (t, *J* = 7.1 Hz, 3H). <sup>13</sup>C NMR (150 MHz, CDCl<sub>3</sub>) δ 182.8, 162.3, 148.5, 134.8, 133.2, 131.9, 131.6, 128.9, 128.9, 128.0, 127.8, 126.9, 123.6, 120.6, 62.5, 14.1.

ethyl (*E*)-4-(furan-2-yl)-2-oxobut-3-enoate (**2p**)

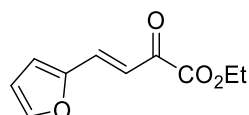

**2p**

The compound **2p** was prepared using the general procedure B<sup>2b</sup>. <sup>1</sup>H NMR (600 MHz, (CD<sub>3</sub>)<sub>2</sub>SO) δ 7.98–7.94 (m, 1H), 7.61 (d, *J* = 15.9 Hz, 1H), 7.18 (d, *J* = 3.5 Hz, 1H), 7.01 (d, *J* = 15.9 Hz, 1H), 6.71 (dd, *J* = 3.5, 1.8 Hz, 1H), 4.29 (q, *J* = 7.1 Hz, 2H), 1.29 (t, *J* = 7.1 Hz, 3H). <sup>13</sup>C NMR (150 MHz, (CD<sub>3</sub>)<sub>2</sub>SO) δ 182.5, 161.9, 150.4, 147.6, 133.3, 119.7, 117.6, 113.6, 61.9, 13.8.

ethyl (*E*)-2-oxo-4-(thiophen-2-yl)but-3-enoate (**2q**)

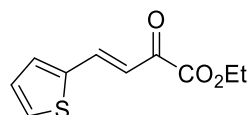

**2q**

The compound **2q** was prepared using the general procedure B<sup>2b</sup>. <sup>1</sup>H NMR (400 MHz, (CD<sub>3</sub>)<sub>2</sub>SO) δ 7.98 (d, *J* = 15.9 Hz, 1H), 7.87 (d, *J* = 5.0 Hz, 1H), 7.72 (d, *J* = 3.6 Hz, 1H), 7.21 (dd, *J* = 5.0, 3.7 Hz, 1H), 7.00 (d, *J* = 15.9 Hz, 1H), 4.30 (q, *J* = 7.1 Hz, 2H), 1.30 (t, *J* = 7.1

Hz, 3H).  $^{13}\text{C}$  NMR (100 MHz,  $(\text{CD}_3)_2\text{SO}$ )  $\delta$  182.8, 162.2, 140.4, 139.1, 134.9, 132.4, 129.2, 119.4, 62.0, 40.2, 40.0, 39.8, 39.6, 39.4, 39.2, 39.0, 13.9.

### 2.3 General procedure for the preparation of catalysts.

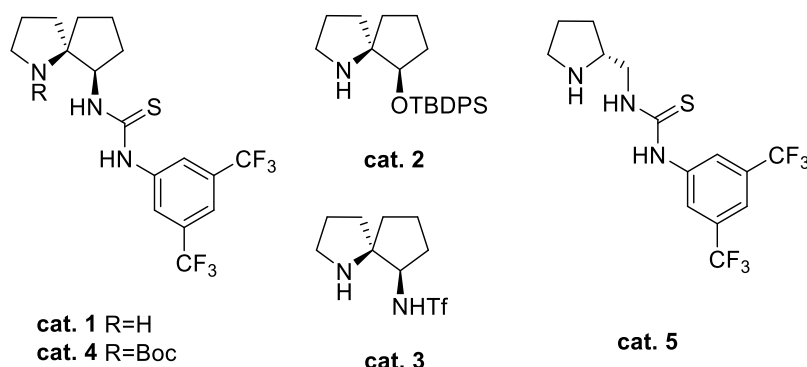

The catalysts **cat. 2**<sup>3</sup>, **cat. 3**<sup>4</sup>, and **cat. 5**<sup>5</sup> are known compounds and the analytical data ( $^1\text{H}$  NMR) matches with the literature.

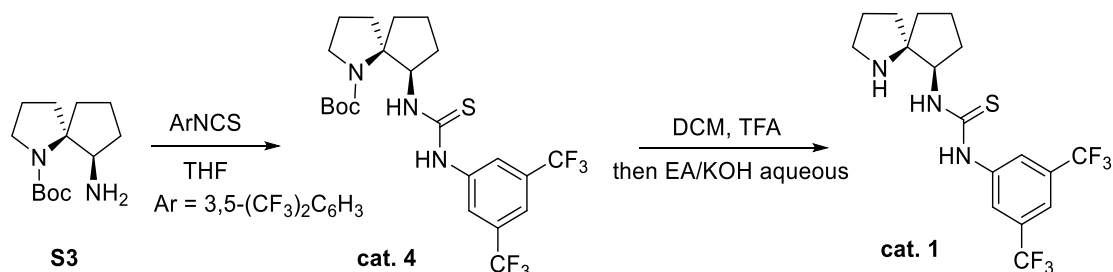

To a solution of **S3** (1.7 g, 1.0 equiv) in dry THF (30 mL), 3,5-bis(trifluoromethyl)phenyl isocyanate (2.2 g, 1.1 equiv) was added dropwise under argon atmosphere. The solution was stirred at room temperature until **S3** disappeared by TLC detection. The solution was quenched with  $\text{H}_2\text{O}$  (20 mL), and then the mixture was extracted by AcOEt (50 mL  $\times$  3). The combined organic layer was washed with brine (50 mL), dried over anhydrous  $\text{Na}_2\text{SO}_4$ , and evaporated under reduced pressure. The residue was purified by flash chromatography on silica gel (petroleum ether:EtOAc = 50:1 to 10:1) to give **cat. 4** in 80% yield. (**cat. 4** was further purified by  $\text{Et}_2\text{O}$  recrystallization)

TFA (10 equiv) was added dropwise to a solution of **cat. 4** (1.0 g, 1.0 equiv) in dry DCM. The solution was stirred at room temperature until **cat. 4** disappeared by TLC detection. Then the resulting solution was concentrated in vacuo to remove most of TFA, and the residue was diluted with EtOAc (20 mL), then KOH aqueous solution (5 mL, 10 g KOH in 50 mL  $\text{H}_2\text{O}$ ) was added to ensure that the pH of the mixture was 10~12, the mixture was extracted by AcOEt (20 mL  $\times$  3). The combined organic layer was dried over anhydrous  $\text{Na}_2\text{SO}_4$ , and evaporated under reduced pressure. The crude residue was purified through column chromatography on silica gel (PE:EA = 5:1 to EA) to give **cat. 1** in 86% yield. (note: **cat. 1** was easily converted to **cat. 7** in DCM. Therefore, the use of DCM should be avoided after the system was alkalinized. After purification and concentration, the residue was dissolved in  $\text{Et}_2\text{O}$ , and concentrated in vacuo to obtain **cat. 1** as a white solid. **Cat. 1** was stored in a frozen environment, and the purity of the catalyst had a great impact on the reaction.)

*tert*-butyl(5*R*,6*R*)-6-(3-(3,5-bis(trifluoromethyl)phenyl)thioureido)-1-azaspiro[4.4]nonane-1-

carboxylate (**cat. 4**)

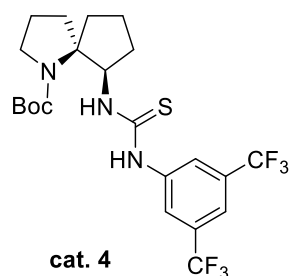

**Cat. 4** was isolated as a white solid (m.p. = 193 – 195 °C) in 80% yield.  $[\alpha]_D^{19} = +103.0$  (c 1.0, AcOEt).  $^1\text{H NMR}$  (400 MHz,  $\text{CDCl}_3$ )  $\delta$  8.95 (s, 1H), 8.56 (d,  $J = 7.1$  Hz, 1H), 7.77 (s, 2H), 7.59 (s, 1H), 4.71 (q,  $J = 13.0, 6.2$  Hz, 1H), 3.35 (d,  $J = 5.3$  Hz, 2H), 2.68–2.45 (m, 1H), 2.30 – 2.15 (m, 1H), 2.14 – 2.03 (m, 1H), 2.02 – 1.90 (m, 2H), 1.89–1.66 (m, 3H), 1.66–1.46 (m, 2H), 1.11 (s, 9H).  $^{13}\text{C NMR}$  (100 MHz,  $\text{CDCl}_3$ )  $\delta$  179.2, 155.8, 139.3, 132.7, 132.4, 124.3, 132.1, 122.8, 121.6, 118.1, 107.2, 79.8, 71.3, 64.5, 48.9, 42.0, 35.0, 32.3, 28.0, 22.5, 21.9.  $^{19}\text{F NMR}$  (376 MHz,  $\text{CDCl}_3$ )  $\delta$  -63.19. **HRMS**(ESI)  $m/z$  ( $\text{M}+\text{Na}$ ) $^+$ : calculated for  $\text{C}_{22}\text{H}_{27}\text{F}_6\text{N}_3\text{O}_2\text{SNa}$ : 534.1620, found: 534.1628. **IR** (neat)  $\text{cm}^{-1}$ : 3309, 3171, 2972, 1675, 1385, 1279, 1126, 883, 725.

1-(3,5-bis(trifluoromethyl)phenyl)-3-((5*R*,6*R*)-1-azaspiro[4.4]nonan-6-yl)thiourea (**cat. 1**)

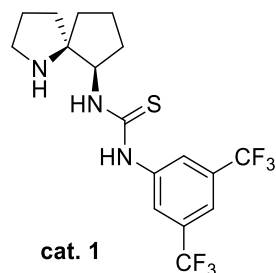

**Cat. 1** was isolated as a white solid (m.p. = 49 – 51 °C) in 86% yield.  $[\alpha]_D^{19} = +70.0$  (c 1.0, AcOEt).  $^1\text{H NMR}$  (400 MHz,  $(\text{CD}_3)_2\text{SO}$ )  $\delta$  10.95 (s, 1H), 8.81 (s, 1H), 8.38 (s, 2H), 7.69 (s, 1H), 4.55 (s, 1H), 3.19–2.95 (m, 2H), 2.18–2.03 (m, 1H), 1.89 (s, 3H), 1.86 (s, 1H), 1.84–1.68 (m, 5H), 1.65 – 1.50 (m, 2H).  $^{13}\text{C NMR}$  (100 MHz,  $(\text{CD}_3)_2\text{SO}$ )  $\delta$  180.4, 173.1, 130.2, 129.9, 124.6, 121.9, 121.4, 115.8, 71.9, 59.7, 45.3, 35.5, 34.9, 29.8, 24.0, 21.7, 19.7.  $^{19}\text{F NMR}$  (376 MHz,  $(\text{CD}_3)_2\text{SO}$ )  $\delta$  -61.67, -61.68, -61.69. **HRMS**(ESI)  $m/z$  ( $\text{M}+\text{H}$ ) $^+$ : calculated for  $\text{C}_{17}\text{H}_{20}\text{F}_6\text{N}_3\text{S}$ : 412.1277, found: 412.1280. **IR** (neat)  $\text{cm}^{-1}$ : 3443, 2960, 1596, 1384, 1276, 1128, 681.

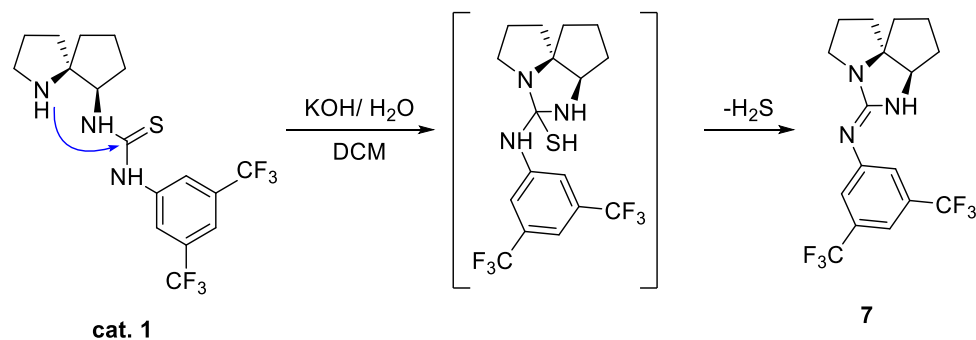

To the stirred solution of the (*R,R*)-**cat. 1** (10 mg) in DCM (0.5 mL) were added two drops of aqueous KOH (5g KOH dissolved in 50 mL  $\text{H}_2\text{O}$ ) solution at room temperature, the reaction

was stirred 24 hours, and the mixture was extracted by DCM. The combined organic layer was dried over anhydrous Na<sub>2</sub>SO<sub>4</sub>, and evaporated under reduced pressure. The crude residue was purified through column chromatography on silica gel (PE:EA = 3:1) to give **7** (7.6 mg) as a colorless solid in 82% yield.

(3*aR*,9*aR*,*E*)-*N*-(3,5-bis(trifluoromethyl)phenyl)hexahydro-7*H*-cyclopenta[*d*]pyrrolo[1,2-*c*]imidazol-5(1*H*)-imine (**7**)

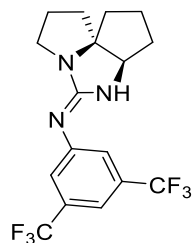

**7**

**7** was isolated as a colorless solid (m.p. = 123 – 124 °C) in 82% yield.  $[\alpha]_D^{20} = +62.0$  (c 1.0, AcOEt). <sup>1</sup>H NMR (400 MHz, CDCl<sub>3</sub>) δ 7.31 (d, *J* = 8.9 Hz, 3H), 6.11 (s, 1H), 3.94 (d, *J* = 4.5 Hz, 1H), 3.27 (s, 1H), 3.13–2.90 (m, 1H), 2.03–1.84 (m, 5H), 1.84–1.74 (m, 1H), 1.74–1.59 (m, 3H), 1.40 (td, *J* = 12.3, 5.7 Hz, 1H). <sup>13</sup>C NMR (100 MHz, CDCl<sub>3</sub>) δ 160.0, 151.9, 132.3, 132.0, 131.7, 131.4, 127.7, 125.0, 122.6, 122.3, 119.6, 113.4, 79.3, 62.4, 47.4, 39.5, 36.0, 35.4, 26.2, 23.9. <sup>19</sup>F NMR (376 MHz, CDCl<sub>3</sub>) δ -62.90. HRMS(ESI) *m/z* (*M*+*H*)<sup>+</sup>: calculated for C<sub>17</sub>H<sub>18</sub>F<sub>6</sub>N<sub>3</sub>: 378.1399, found: 378.1402. IR (neat) cm<sup>-1</sup>: 3380, 2962, 1386, 1595, 1376, 1277, 1127, 956, 703.

### 3. General procedure for the remote asymmetric conjugate addition of 5-benzylfurfurals with β,γ-unsaturated α-ketoesters

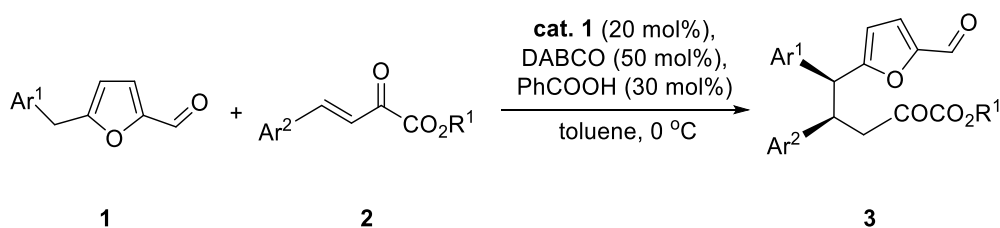

To a solution of 5-benzylfurfurals **1** (0.225 mmol, 1.5 equiv), **cat. 1** (0.03 mmol, 0.2 equiv), DABCO (0.075 mmol, 0.5 equiv) and PhCOOH (0.045 mmol, 0.3 equiv) in toluene (1.8 mL) at 0 °C, β,γ-unsaturated α-ketoesters **2** (0.15 mmol, 1.0 equiv) was added, and the reaction mixture was stirred at the same temperature until **2** disappeared by TLC detection. The solution was then quenched with H<sub>2</sub>O (2 mL), extracted by AcOEt (10 mL × 3). The combined organic layer was washed with brine (10 mL), dried over anhydrous Na<sub>2</sub>SO<sub>4</sub>, and evaporated under reduced pressure. The residue was purified by flash chromatography on silica gel (petroleum ether:EtOAc = 10:1 to 3:1) to afford compound **3**.

ethyl (4*R*,5*S*)-5-(5-formylfuran-2-yl)-2-oxo-4,5-diphenylpentanoate (**3a**)

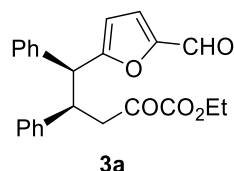

The reaction was carried out following the general procedure to give two diastereoisomers with 81% yield and 81:19 dr. The major isomer **3a** was isolated as a white solid (m.p. = 117 – 119 °C); The minor isomer **3a'** was isolated as a white solid (m.p. = 123 – 124 °C). Enantiomeric excess was determined by UPC<sup>2</sup> using Chiralpak IG-3 column, CO<sub>2</sub>/MeOH 95:5, flow rate 2mL/min, **3a**: 96%,  $t_{\text{minor}} = 3.449$  min,  $t_{\text{major}} = 3.821$  min; **3a'**: 91%,  $t_{\text{minor}} = 3.329$  min,  $t_{\text{major}} = 3.654$  min.  $[\alpha]_{\text{D}}^{27} = -5.0$  (c 1.0, AcOEt, **3a**);  $[\alpha]_{\text{D}}^{27} = -160.0$  (c 0.1, AcOEt, **3a'**). <sup>1</sup>H NMR (400 MHz, CDCl<sub>3</sub>) **3a**:  $\delta$  9.41 (s, 1H), 7.51–7.42 (m, 2H), 7.36 (t,  $J = 7.4$  Hz, 2H), 7.31–7.25 (m, 1H), 7.23–7.15 (m, 4H), 7.14 – 7.08 (m, 1H), 6.91 (d,  $J = 3.6$  Hz, 1H), 6.08 (d,  $J = 3.6$  Hz, 1H), 4.31 (d,  $J = 11.6$  Hz, 1H), 4.22–4.04 (m, 3H), 3.27 (dd,  $J = 17.5, 9.9$  Hz, 1H), 2.92 (dd,  $J = 17.5, 4.1$  Hz, 1H), 1.23 (t,  $J = 7.1$  Hz, 3H); **3a'**:  $\delta$  9.58 (s, 1H), 7.16 (d,  $J = 3.6$  Hz, 1H), 7.15–7.11 (m, 5H), 7.11–7.01 (m, 5H), 6.42 (d,  $J = 3.6$  Hz, 1H), 4.34 (d,  $J = 10.8$  Hz, 1H), 4.23–4.16 (m, 2H), 4.15 – 4.08 (m, 1H), 3.40 (dd,  $J = 17.6, 9.0$  Hz, 1H), 3.16 (dd,  $J = 17.6, 4.9$  Hz, 1H), 1.27 (t,  $J = 7.1$  Hz, 3H). <sup>13</sup>C NMR (100 MHz, CDCl<sub>3</sub>) **3a**:  $\delta$  192.1, 177.0, 162.1, 160.3, 151.8, 140.9, 138.5, 129.1, 128.5, 128.5, 127.8, 127.0, 109.9, 62.4, 52.0, 44.9, 43.7, 13.8; **3a'**  $\delta$  192.0, 177.2, 162.4, 160.4, 152.2, 140.3, 138.3, 128.5, 128.4, 128.3, 128.1, 127.1, 126.9, 110.4, 62.5, 51.7, 45.1, 44.0, 13.8. HRMS(ESI)  $m/z$  (M+Na)<sup>+</sup>: calculated for C<sub>24</sub>H<sub>22</sub>O<sub>5</sub>Na: 413.1359, found: 413.1364 (**3a**); 413.1359 (**3a'**). IR (neat) cm<sup>-1</sup>: **3a** 2925, 1724, 1671, 1512, 1260, 1069, 1022, 760, 700; **3a'** 2963, 1670, 1384, 1260, 1087, 798.

ethyl (4*R*,5*S*)-5-(5-formylfuran-2-yl)-2-oxo-4-phenyl-5-(*o*-tolyl)pentanoate (**3b**)

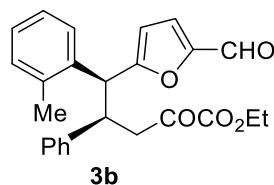

The reaction was carried out following the general procedure to give two diastereoisomers with 66% yield and 75:25 dr as a colorless oil. Enantiomeric excess was determined by UPC<sup>2</sup> using Chiralpak IG-3 column, CO<sub>2</sub>/MeOH 95:5, flow rate 2mL/min, the major isomer **3b**: 95%,  $t_{\text{major}} = 2.656$  min,  $t_{\text{minor}} = 2.996$  min; the minor isomer **3b'**: 90%,  $t_{\text{minor}} = 2.888$  min,  $t_{\text{major}} = 3.104$  min.  $[\alpha]_{\text{D}}^{27} = -18.0$  (c 1.0, AcOEt, **3b**);  $[\alpha]_{\text{D}}^{27} = -36.0$  (c 0.5, AcOEt, **3b'**). <sup>1</sup>H NMR (600 MHz, (CD<sub>3</sub>)<sub>2</sub>SO) **3b**  $\delta$  9.33 (s, 1H), 7.58 (d,  $J = 7.4$  Hz, 1H), 7.37 (d,  $J = 7.2$  Hz, 2H), 7.29–7.15 (m, 6H), 7.11 (t,  $J = 7.3$  Hz, 1H), 6.46 (d,  $J = 3.6$  Hz, 1H), 4.70 (d,  $J = 11.7$  Hz, 1H), 4.13 (td,  $J = 11.2, 3.5$  Hz, 1H), 4.07 (q,  $J = 7.1$  Hz, 2H), 3.34–3.29 (m, 1H), 2.85 (dd,  $J = 17.3, 3.6$  Hz, 1H), 1.16 (t,  $J = 7.1$  Hz, 3H); **3b'**  $\delta$  9.49 (s, 1H), 7.56 (d,  $J = 7.5$  Hz, 1H), 7.46 (d,  $J = 3.5$  Hz, 1H), 7.26–7.22 (m, 2H), 7.11–7.06 (m, 3H), 7.03 – 6.97 (m, 1H), 6.94 – 6.86 (m, 2H), 6.75 (d,  $J = 3.6$  Hz, 1H), 4.86 (d,  $J = 11.5$  Hz, 1H), 4.11 (q,  $J = 7.1$  Hz, 3H), 3.43 (dd,  $J = 17.6, 9.6$  Hz, 1H), 3.11 (dd,  $J = 17.5, 4.4$  Hz, 1H), 2.16 (s, 3H), 1.18 (t,  $J = 7.1$  Hz, 3H). <sup>13</sup>C NMR (150 MHz, (CD<sub>3</sub>)<sub>2</sub>SO) **3b**  $\delta$  192.3, 177.3, 162.3, 160.0, 151.0, 141.6, 137.4, 136.4, 130.7, 128.1, 128.1, 127.2, 127.1, 126.8, 126.7, 110.2, 61.7, 45.9, 44.1, 42.8, 19.7, 13.7; **3b'**  $\delta$  191.8, 177.6, 162.4, 160.0, 151.8, 141.4, 137.3, 135.6, 130.0, 128.2, 127.9, 127.8, 126.4, 126.0, 110.6, 61.7, 45.0,

44.0, 43.8, 19.4, 13.7. **HRMS**(ESI)  $m/z$  (M+Na)<sup>+</sup>: calculated for C<sub>25</sub>H<sub>24</sub>O<sub>5</sub>Na: 427.1516, found: 427.1521 (**3b**); 427.1516 (**3b'**). **IR** (neat) cm<sup>-1</sup>: **3b** 2962, 1725, 1675, 1260, 1020, 798, 755, 700; **3b'** 2922, 1724, 1675, 1261, 1024, 799.

ethyl (4*R*,5*S*)-5-(5-formylfuran-2-yl)-2-oxo-4-phenyl-5-(*m*-tolyl)pentanoate (**3c**)

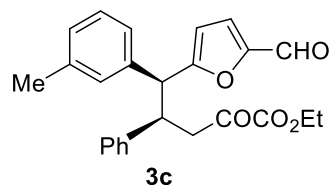

The reaction was carried out following the general procedure to give two diastereoisomers with 80% yield and 76:24 dr. The major isomer **3c** was isolated as a light yellow solid (m.p. = 81 – 83 °C); The minor isomer **3c'** was isolated as a light yellow solid (m.p. = 121 – 122 °C). Enantiomeric excess of the major isomer **3c** was determined by UPC<sup>2</sup> using Trefoil™ CEL1 column, CO<sub>2</sub>/MeOH 90:10, flow rate 2mL/min, 93%,  $t_{\text{minor}} = 1.005$  min,  $t_{\text{major}} = 1.186$  min; Enantiomeric excess of the minor isomer **3c'** was determined by UPC<sup>2</sup> using Chiralpak IG-3 column, CO<sub>2</sub>/MeOH 95:5, flow rate 2mL/min, 89%,  $t_{\text{minor}} = 2.757$  min,  $t_{\text{major}} = 3.045$  min.  $[\alpha]_{\text{D}}^{26} = -1.0$  (c 1.0, AcOEt, **3c**);  $[\alpha]_{\text{D}}^{26} = -88.0$  (c 0.5, AcOEt, **3c'**). **<sup>1</sup>H NMR** (400 MHz, CDCl<sub>3</sub>) **3c**  $\delta$  9.42 (s, 1H), 7.34–7.16 (m, 8H), 7.15 – 7.06 (m, 2H), 6.91 (d,  $J = 3.5$  Hz, 1H), 6.08 (d,  $J = 3.5$  Hz, 1H), 4.26 (d,  $J = 11.7$  Hz, 1H), 4.20–4.03 (m, 3H), 3.27 (dd,  $J = 17.6, 9.9$  Hz, 1H), 2.92 (dd,  $J = 17.5, 3.9$  Hz, 1H), 2.36 (s, 3H), 1.24 (t,  $J = 7.1$  Hz, 3H); **3c'**  $\delta$  9.59 (s, 1H), 7.20–7.09 (m, 3H), 7.08 – 6.98 (m, 4H), 6.97 – 6.88 (m, 3H), 6.40 (d,  $J = 3.4$  Hz, 1H), 4.30 (d,  $J = 10.7$  Hz, 1H), 4.20 (q,  $J = 7.0$  Hz, 2H), 4.16–4.05 (m, 1H), 3.39 (dd,  $J = 17.6, 9.0$  Hz, 1H), 3.15 (dd,  $J = 17.6, 4.8$  Hz, 1H), 2.20 (s, 3H), 1.28 (t,  $J = 7.2$  Hz, 3H). **<sup>13</sup>C NMR** (100 MHz, CDCl<sub>3</sub>) **3c**  $\delta$  192.2, 177.1, 162.4, 160.3, 151.8, 141.1, 138.9, 138.5, 129.2, 129.1, 128.6, 128.5, 127.8, 127.1, 125.5, 109.9, 62.4, 52.0, 44.8, 43.9, 21.5, 13.8; **3c'**  $\delta$  192.1, 177.3, 162.7, 160.5, 152.2, 140.4, 138.1, 138.0, 129.3, 128.3, 128.2, 127.9, 126.9, 125.5, 110.4, 62.5, 51.6, 45.0, 44.0, 21.3, 13.9. **HRMS**(ESI)  $m/z$  (M+Na)<sup>+</sup>: calculated for C<sub>25</sub>H<sub>24</sub>O<sub>5</sub>Na: 427.1516, found: 427.1521 (**3c**); 427.1516 (**3c'**). **IR** (neat) cm<sup>-1</sup>: **3c** 2962, 1725, 1674, 1260, 1069, 1022, 799, 751, 700; **3c'** 2963, 2924, 1725, 1676, 1384, 1260, 1092, 1020, 798.

ethyl (4*R*,5*S*)-5-(5-formylfuran-2-yl)-2-oxo-4-phenyl-5-(*p*-tolyl)pentanoate (**3d**)

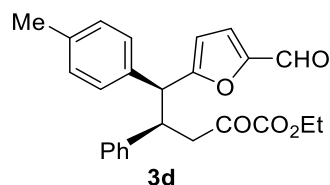

The reaction was carried out following the general procedure to give two diastereoisomers with 80% yield and 82:18 dr as a colorless oil. Enantiomeric excess of the major isomer **3d** was determined by UPC<sup>2</sup> using Chiralpak IG-3 column, CO<sub>2</sub>/MeOH 95:5, flow rate 2mL/min, 97%,  $t_{\text{minor}} = 3.296$  min,  $t_{\text{major}} = 4.126$  min; Enantiomeric excess of the minor isomer **3d'** was determined by UPC<sup>2</sup> using Chiralpak AD-3 column, CO<sub>2</sub>/MeOH 95:5, flow rate 2mL/min, 91%,  $t_{\text{minor}} = 1.816$  min,  $t_{\text{major}} = 2.143$  min.  $[\alpha]_{\text{D}}^{27} = -10.0$  (c 1.0, AcOEt, **3d**);  $[\alpha]_{\text{D}}^{27} = -60.0$  (c 0.5, AcOEt, **3d'**). **<sup>1</sup>H NMR** (400 MHz, CDCl<sub>3</sub>) **3d**  $\delta$  9.41 (s, 1H), 7.34 (d,  $J = 8.0$  Hz, 2H), 7.24–7.15 (m, 6H), 7.14–7.07 (m, 1H), 6.90 (d,  $J = 3.6$  Hz, 1H), 6.06 (d,  $J = 3.6$  Hz, 1H), 4.27 (d,  $J = 11.6$  Hz, 1H), 4.19–4.07 (m, 3H), 3.25 (dd,  $J = 17.5, 9.9$  Hz, 1H), 2.94 (dd,  $J = 17.5, 4.1$  Hz,



1H), 2.33 (s, 3H), 1.23 (t,  $J = 7.1$  Hz, 3H); **3d'**  $\delta$  9.57 (s, 1H), 7.17–7.10 (m, 3H), 7.10–6.99 (m, 5H), 6.94 (d,  $J = 8.0$  Hz, 2H), 6.39 (d,  $J = 3.6$  Hz, 1H), 4.32 (d,  $J = 10.7$  Hz, 1H), 4.25–4.16 (m, 2H), 4.15 – 4.05 (m, 1H), 3.37 (dd,  $J = 17.6, 8.9$  Hz, 1H), 3.14 (dd,  $J = 17.6, 4.9$  Hz, 1H), 2.20 (s, 3H), 1.27 (t,  $J = 7.1$  Hz, 3H).  $^{13}\text{C}$  NMR (100 MHz,  $\text{CDCl}_3$ ) **3d**  $\delta$  192.2, 177.0, 162.5, 160.3, 151.7, 141.1, 137.6, 135.5, 129.8, 128.5, 128.4, 127.8, 127.0, 109.8, 62.3, 51.7, 44.9, 43.8, 21.0, 13.8; **3d'**  $\delta$  192.1, 177.2, 162.8, 160.5, 152.2, 140.5, 136.7, 135.2, 129.1, 128.3, 128.3, 128.2, 126.8, 110.3, 62.5, 51.2, 45.0, 44.1, 20.9, 13.8. HRMS(ESI)  $m/z$  ( $\text{M}+\text{Na}$ ) $^+$ : calculated for  $\text{C}_{25}\text{H}_{24}\text{O}_5\text{Na}$ : 427.1516, found: 427.1520 (**3d**); 427.1516 (**3d'**). IR (neat)  $\text{cm}^{-1}$ : **3d** 2925, 1725, 1672, 1511, 1260, 1069, 1020, 793, 755, 700; **3d'** 2922, 1726, 1674, 1384, 1261, 1021, 800.

ethyl (4*R*,5*S*)-5-(5-formylfuran-2-yl)-5-(3-methoxyphenyl)-2-oxo-4-phenylpentanoate (**3e**)

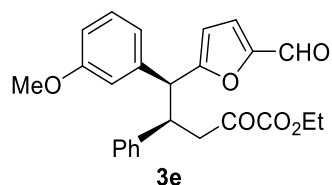

The reaction was carried out following the general procedure to give two diastereoisomers with 65% yield and 78:22 dr. The major isomer **3e** was isolated as a light yellow oil; The minor isomer **3e'** was isolated as a light yellow solid (m.p. = 138 – 140 °C). Enantiomeric excess was determined by UPC<sup>2</sup> using Chiralpak AD-3 column,  $\text{CO}_2/\text{MeOH}$  95:5, flow rate 2mL/min, **3e**: 94%,  $t_{\text{minor}} = 1.899$  min,  $t_{\text{major}} = 2.611$  min; **3e'**: 88%,  $t_{\text{minor}} = 2.007$  min,  $t_{\text{major}} = 2.262$  min.  $[\alpha]_{\text{D}}^{27} = -4.0$  (c 1.0, AcOEt, **3e**);  $[\alpha]_{\text{D}}^{27} = -76.0$  (c 0.5, AcOEt, **3e'**).  $^1\text{H}$  NMR (400 MHz,  $(\text{CD}_3)_2\text{SO}$ ) **3e**  $\delta$  9.33 (s, 1H), 7.35 (d,  $J = 7.2$  Hz, 2H), 7.29 (t,  $J = 7.9$  Hz, 1H), 7.24–7.15 (m, 3H), 7.13 – 7.05 (m, 3H), 6.85 (dd,  $J = 8.1, 2.0$  Hz, 1H), 6.51 (d,  $J = 3.6$  Hz, 1H), 4.57 (d,  $J = 11.8$  Hz, 1H), 4.09–3.95 (m, 3H), 3.76 (s, 3H), 3.26 (dd,  $J = 17.3, 10.4$  Hz, 1H), 2.85 (dd,  $J = 17.3, 3.9$  Hz, 1H), 1.14 (t,  $J = 7.1$  Hz, 3H); **3e'**  $\delta$  9.51 (s, 1H), 7.48 (d,  $J = 3.5$  Hz, 1H), 7.19 (d,  $J = 7.3$  Hz, 2H), 7.11 (t,  $J = 7.5$  Hz, 2H), 7.07–6.99 (m, 2H), 6.81 – 6.71 (m, 3H), 6.60 (dd,  $J = 8.1, 2.2$  Hz, 1H), 4.62 (d,  $J = 11.3$  Hz, 1H), 4.10 (q,  $J = 7.1$  Hz, 2H), 4.06–3.96 (m, 1H), 3.61 (s, 3H), 3.38 (d,  $J = 10.0$  Hz, 1H), 3.32 (s, 1H), 3.05 (dd,  $J = 17.4, 4.2$  Hz, 1H), 1.18 (t,  $J = 7.1$  Hz, 3H).  $^{13}\text{C}$  NMR (100 MHz,  $(\text{CD}_3)_2\text{SO}$ ) **3e**  $\delta$  192.1, 177.4, 162.6, 159.9, 159.5, 151.0, 141.8, 141.0, 129.9, 128.0, 126.6, 120.5, 114.5, 112.5, 110.0, 61.7, 55.0, 50.4, 44.2, 43.4, 13.6; **3e'**  $\delta$  191.9, 177.7, 162.5, 160.0, 158.9, 151.8, 141.1, 140.6, 129.2, 128.3, 127.9, 126.4, 120.7, 114.4, 111.9, 110.5, 61.7, 54.8, 49.9, 44.2, 44.0, 13.7. HRMS(ESI)  $m/z$  ( $\text{M}+\text{Na}$ ) $^+$ : calculated for  $\text{C}_{25}\text{H}_{24}\text{O}_6\text{Na}$ : 443.1465, found: 443.1470 (**3e**); 443.1465 (**3e'**). IR (neat)  $\text{cm}^{-1}$ : **3e** 2925, 1720, 1668, 1384, 1259, 1068, 748, 697; **3e'** 2923, 1723, 1670, 1384, 1260, 1020, 799, 696.

ethyl (4*R*,5*S*)-5-(5-formylfuran-2-yl)-5-(4-methoxyphenyl)-2-oxo-4-phenylpentanoate (**3f**)

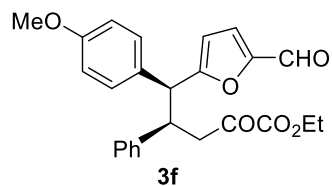

The reaction was carried out following the general procedure to give two diastereoisomers with 73% yield and 81:19 dr as a light yellow oil. Enantiomeric excess of the major isomer **3f** was determined by UPC<sup>2</sup> using Chiralpak IG-3 column,  $\text{CO}_2/\text{MeOH}$  95:5, flow rate 2mL/min,

97%,  $t_{\text{minor}} = 1.971$  min,  $t_{\text{major}} = 2.499$  min; Enantiomeric excess of the minor isomer **3f'** was determined by UPC<sup>2</sup> using Chiralpak AD-3 column, CO<sub>2</sub>/MeOH 95:5, flow rate 2mL/min, 94%,  $t_{\text{minor}} = 2.511$  min,  $t_{\text{major}} = 3.017$  min.  $[\alpha]_{\text{D}}^{27} = -4.0$  (c 1.0, AcOEt, **3f**).  $[\alpha]_{\text{D}}^{27} = -120.0$  (c 0.5, AcOEt, **3f'**). <sup>1</sup>H NMR (600 MHz, (CD<sub>3</sub>)<sub>2</sub>SO) **3f**  $\delta$  9.33 (s, 1H), 7.43 (t,  $J = 5.7$  Hz, 2H), 7.34 (d,  $J = 7.2$  Hz, 2H), 7.23–7.15 (m, 3H), 7.08 (t,  $J = 7.3$  Hz, 1H), 6.94 (d,  $J = 8.7$  Hz, 2H), 6.45 (d,  $J = 3.6$  Hz, 1H), 4.54 (d,  $J = 11.8$  Hz, 1H), 4.06 (q,  $J = 7.1$  Hz, 2H), 3.96 (td,  $J = 11.1, 3.9$  Hz, 1H), 3.73 (s, 3H), 3.24 (dd,  $J = 17.3, 10.3$  Hz, 1H), 2.85 (dd,  $J = 17.3, 4.0$  Hz, 1H), 1.14 (t,  $J = 7.1$  Hz, 3H); **3f'**  $\delta$  9.50 (s, 1H), 7.47 (d,  $J = 3.5$  Hz, 1H), 7.17 (d,  $J = 7.2$  Hz, 2H), 7.14–7.09 (m, 4H), 7.02 (t,  $J = 7.3$  Hz, 1H), 6.69 (dd,  $J = 14.9, 6.1$  Hz, 3H), 4.58 (d,  $J = 11.3$  Hz, 1H), 4.10 (q,  $J = 7.1$  Hz, 2H), 4.02–3.95 (m, 1H), 3.61 (s, 3H), 3.37 – 3.31 (m, 1H), 3.31 (s, 1H), 3.04 (dd,  $J = 17.4, 4.3$  Hz, 1H), 1.18 (t,  $J = 7.1$  Hz, 3H). <sup>13</sup>C NMR (150 MHz, (CD<sub>3</sub>)<sub>2</sub>SO) **3f**  $\delta$  192.3, 177.3, 163.1, 160.0, 158.5, 151.0, 141.9, 131.4, 129.5, 128.1, 128.0, 126.5, 114.2, 109.7, 61.7, 55.0, 49.6, 44.5, 43.5, 13.7; **3f'**  $\delta$  191.9, 177.6, 163.1, 160.0, 157.7, 151.7, 141.3, 131.0, 129.5, 128.3, 127.9, 126.3, 113.5, 110.2, 61.7, 54.8, 49.1, 44.3, 44.0, 13.7. HRMS(ESI)  $m/z$  (M+Na)<sup>+</sup>: calculated for C<sub>25</sub>H<sub>24</sub>O<sub>6</sub>Na: 443.1465, found: 443.1469 (**3f**); 443.1465 (**3f'**). IR (neat) cm<sup>-1</sup>: **3f** 2961, 1725, 1674, 1511, 1249, 1069, 1026, 799, 754, 701; **3f'** 2924, 1725, 1671, 1511, 1260, 1024, 800, 699.

ethyl (4*R*,5*S*)-5-(4-(tert-butyl)phenyl)-5-(5-formylfuran-2-yl)-2-oxo-4-phenylpentanoate (**3g**)

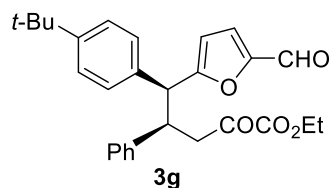

The reaction was carried out following the general procedure to give two diastereoisomers with 89% yield and 78:22 dr. The major isomer **3g** was isolated as a light yellow solid (m.p. = 128 – 129 °C); The minor isomer **3g'** was isolated as a white solid (m.p. = 138 – 139 °C). Enantiomeric excess was determined by UPC<sup>2</sup> using Chiralpak IG-3 column, CO<sub>2</sub>/MeOH 95:5, flow rate 2mL/min, **3g**: 97%,  $t_{\text{minor}} = 2.651$  min,  $t_{\text{major}} = 3.104$  min; **3g'**: 91%,  $t_{\text{major}} = 2.616$  min,  $t_{\text{minor}} = 3.051$  min.  $[\alpha]_{\text{D}}^{26} = -8.0$  (c 1.0, AcOEt, **3g**).  $[\alpha]_{\text{D}}^{26} = -100.0$  (c 0.5, AcOEt, **3g'**). <sup>1</sup>H NMR (400 MHz, CDCl<sub>3</sub>) **3g**  $\delta$  9.41 (s, 1H), 7.37 (s, 4H), 7.25–7.15 (m, 4H), 7.14 – 7.08 (m, 1H), 6.90 (d,  $J = 3.6$  Hz, 1H), 6.06 (d,  $J = 3.6$  Hz, 1H), 4.27 (d,  $J = 11.7$  Hz, 1H), 4.18–4.07 (m, 3H), 3.29 (dd,  $J = 17.5, 10.2$  Hz, 1H), 2.91 (dd,  $J = 17.5, 3.9$  Hz, 1H), 1.30 (s, 9H), 1.23 (t,  $J = 7.1$  Hz, 3H); **3g'**  $\delta$  9.59 (s, 1H), 7.18–7.13 (m, 3H), 7.13 – 7.07 (m, 2H), 7.06 – 6.98 (m, 5H), 6.38 (d,  $J = 3.6$  Hz, 1H), 4.31 (d,  $J = 10.3$  Hz, 1H), 4.26–4.15 (m, 2H), 4.14 – 4.04 (m, 1H), 3.40 (dd,  $J = 17.6, 9.1$  Hz, 1H), 3.14 (dd,  $J = 17.6, 4.9$  Hz, 1H), 1.27 (t,  $J = 7.1$  Hz, 3H), 1.21 (s, 9H). <sup>13</sup>C NMR (100 MHz, CDCl<sub>3</sub>) **3g**  $\delta$  192.3, 177.0, 162.5, 160.4, 151.7, 150.7, 141.0, 135.4, 128.5, 128.1, 127.8, 127.0, 126.0, 109.8, 62.4, 51.7, 44.9, 43.8, 34.5, 31.3, 13.8; **3g'**  $\delta$  192.2, 177.3, 162.7, 160.5, 152.2, 149.9, 140.5, 135.1, 128.2, 128.1, 128.1, 126.8, 125.2, 110.5, 62.5, 51.2, 45.2, 43.7, 34.3, 31.2, 13.9. HRMS(ESI)  $m/z$  (M+Na)<sup>+</sup>: calculated for C<sub>28</sub>H<sub>30</sub>O<sub>5</sub>Na: 469.1985, found: 469.1989 (**3g**); 469.1987 (**3g'**). IR (neat) cm<sup>-1</sup>: **3g** 2963, 1726, 1675, 1510, 1260, 1069, 1022, 800, 760, 700; **3g'** 2962, 1727, 1678, 1509, 1384, 1261, 1069, 1022, 800, 759, 700.

ethyl (4*R*,5*S*)-5-(2-bromophenyl)-5-(5-formylfuran-2-yl)-2-oxo-4-phenylpentanoate (**3h**)

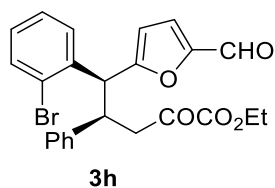

The reaction was carried out following the general procedure to give two diastereoisomers with 67% yield and 80:20 dr as a colorless oil. Enantiomeric excess of the major isomer **3h** was determined by UPC<sup>2</sup> using Chiralpak IG-3 column, CO<sub>2</sub>/MeOH 95:5, flow rate 2mL/min, 96%,  $t_{\text{minor}} = 3.141$  min,  $t_{\text{major}} = 3.419$  min; Enantiomeric excess of the minor isomer **3h'** was determined by UPC<sup>2</sup> using Chiralpak OD-3 column, CO<sub>2</sub>/MeOH 95:5, flow rate 2mL/min, 96%,  $t_{\text{minor}} = 3.134$  min,  $t_{\text{major}} = 3.440$  min.  $[\alpha]_{\text{D}}^{24} = +43.0$  (c 1.0, AcOEt, **3h**);  $[\alpha]_{\text{D}}^{24} = -28.0$  (c 1.0, AcOEt, **3h'**). <sup>1</sup>H NMR (600 MHz, (CD<sub>3</sub>)<sub>2</sub>SO) **3h**  $\delta$  9.35 (s, 1H), 7.69 (ddd,  $J = 12.0, 7.9, 1.3$  Hz, 2H), 7.46 (td,  $J = 7.7, 1.2$  Hz, 1H), 7.30 (d,  $J = 7.2$  Hz, 2H), 7.27–7.20 (m, 4H), 7.14–7.09 (m, 1H), 6.56 (d,  $J = 3.6$  Hz, 1H), 4.97 (d,  $J = 11.7$  Hz, 1H), 4.12 (td,  $J = 11.3, 3.6$  Hz, 1H), 4.09–4.04 (m, 2H), 3.31 (s, 1H), 2.83 (dd,  $J = 17.4, 3.8$  Hz, 1H), 1.15 (t,  $J = 7.1$  Hz, 3H); <sup>1</sup>H NMR (400 MHz, (CD<sub>3</sub>)<sub>2</sub>SO) **3h'**  $\delta$  9.51 (s, 1H), 7.73 (dd,  $J = 7.9, 1.4$  Hz, 1H), 7.48 (d,  $J = 3.5$  Hz, 1H), 7.36 (dd,  $J = 8.0, 1.1$  Hz, 1H), 7.30–7.22 (m, 3H), 7.11 (t,  $J = 7.5$  Hz, 2H), 7.06–6.95 (m, 2H), 6.78 (d,  $J = 3.6$  Hz, 1H), 5.08 (d,  $J = 11.4$  Hz, 1H), 4.21–4.07 (m, 3H), 3.42 (dd,  $J = 17.7, 9.3$  Hz, 1H), 3.15 (dd,  $J = 17.7, 4.4$  Hz, 1H), 1.18 (t,  $J = 7.1$  Hz, 3H). <sup>13</sup>C NMR (150 MHz, (CD<sub>3</sub>)<sub>2</sub>SO) **3h**  $\delta$  191.7, 177.6, 160.8, 159.8, 151.2, 141.2, 137.9, 133.1, 129.6, 128.7, 128.3, 127.9, 126.9, 124.7, 110.8, 61.7, 49.3, 44.1, 42.4, 13.7; <sup>13</sup>C NMR (100 MHz, (CD<sub>3</sub>)<sub>2</sub>SO) **3h'**  $\delta$  191.6, 177.8, 160.6, 159.9, 152.0, 140.7, 137.8, 132.5, 130.2, 128.8, 128.2, 128.0, 127.9, 126.6, 124.1, 111.2, 61.8, 48.3, 43.7, 43.5, 13.7. HRMS(ESI)  $m/z$  (M+Na)<sup>+</sup>: calculated for C<sub>24</sub>H<sub>21</sub>BrO<sub>5</sub>Na: 491.0465, found: 491.0469 (**3h**); 491.0466 (**3h'**). IR (neat) cm<sup>-1</sup>: **3h** 2925, 1726, 1677, 1261, 1084, 1022, 759, 701; **3h'** 2961, 2923, 1724, 1384, 1003, 798.

ethyl (4*R*,5*S*)-5-(3-bromophenyl)-5-(5-formylfuran-2-yl)-2-oxo-4-phenylpentanoate (**3i**)

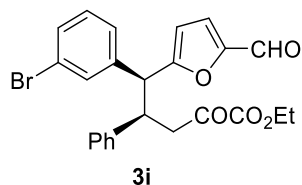

The reaction was carried out following the general procedure to give two diastereoisomers with 77% yield and 73:27 dr. The major isomer **3i** was isolated as a light yellow oil; The minor isomer **3i'** was isolated as a light yellow solid (m.p. = 118 – 119 °C). Enantiomeric excess of **3i** was determined by HPLC using Chiralpak IC-3 column, Hexane/*i*PrOH 80:20, flow rate 1mL/min, 89%,  $t_{\text{minor}} = 15.272$  min,  $t_{\text{major}} = 17.082$  min; Enantiomeric excess of **3i'** was determined by HPLC using Chiralpak ID-3 column, Hexane/*i*PrOH 80:20, flow rate 1mL/min, 89%,  $t_{\text{minor}} = 9.793$  min,  $t_{\text{major}} = 11.908$  min.  $[\alpha]_{\text{D}}^{25} = +16.0$  (c 1.0, AcOEt, **3i**);  $[\alpha]_{\text{D}}^{25} = -42.0$  (c 0.5, AcOEt, **3i'**). <sup>1</sup>H NMR (400 MHz, (CD<sub>3</sub>)<sub>2</sub>SO) **3i**  $\delta$  9.33 (s, 1H), 7.78 (s, 1H), 7.56 (d,  $J = 7.7$  Hz, 1H), 7.51–7.45 (m, 1H), 7.35 (t,  $J = 7.8$  Hz, 3H), 7.24–7.15 (m, 3H), 7.08 (t,  $J = 7.3$  Hz, 1H), 6.56 (d,  $J = 3.6$  Hz, 1H), 4.67 (d,  $J = 11.9$  Hz, 1H), 4.11–3.98 (m, 3H), 3.29 (dd,  $J = 17.3, 10.3$  Hz, 1H), 2.83 (dd,  $J = 17.3, 4.0$  Hz, 1H), 1.15 (t,  $J = 7.1$  Hz, 3H); **3i'**  $\delta$  9.52 (s, 1H), 7.50 (d,  $J = 3.5$  Hz, 1H), 7.38 (s, 1H), 7.28 – 7.18 (m, 4H), 7.17 – 7.08 (m, 3H), 7.07 – 7.00 (m, 1H), 6.80 (d,  $J = 3.6$  Hz, 1H), 4.71 (d,  $J = 11.5$  Hz, 1H), 4.10 (q,  $J = 7.1$  Hz, 2H), 4.02 (td,  $J =$

10.1, 4.1 Hz, 1H), 3.42–3.36 (m, 1H), 3.07 (dd,  $J = 17.5, 4.1$  Hz, 1H), 1.18 (d,  $J = 7.1$  Hz, 3H).  $^{13}\text{C}$  NMR (100 MHz,  $(\text{CD}_3)_2\text{SO}$ ) **3i**  $\delta$  191.9, 177.5, 162.0, 159.8, 151.1, 142.3, 141.6, 131.3, 131.1, 130.4, 128.1, 127.5, 126.6, 122.1, 110.3, 61.7, 49.8, 44.1, 43.3, 13.7; **3i'**  $\delta$  191.7, 177.8, 161.8, 159.9, 151.9, 141.9, 140.8, 131.2, 130.3, 129.6, 128.3, 128.0, 127.5, 126.5, 121.3, 110.7, 61.8, 49.3, 44.0, 43.9, 13.7. HRMS(ESI)  $m/z$  ( $\text{M}+\text{Na}$ ) $^+$ : calculated for  $\text{C}_{24}\text{H}_{21}\text{BrO}_5\text{Na}$ : 491.0465, found: 491.0470 (**3i**); 491.0467 (**3i'**). IR (neat)  $\text{cm}^{-1}$ : **3i** 2962, 2926, 1726, 1675, 1260, 1070, 1022, 798, 701; **3i'** 2962, 2924, 1724, 1675, 1384, 1260, 1019, 798.

ethyl (4*R*,5*S*)-5-(4-bromophenyl)-5-(5-formylfuran-2-yl)-2-oxo-4-phenylpentanoate (**3j**)

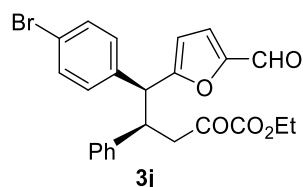

The reaction was carried out following the general procedure to give two diastereoisomers with 68% yield and 82:18 dr. The major isomer **3j** was isolated as a light yellow oil; The minor isomer **3j'** was isolated as a light yellow solid (m.p. = 138 – 139 °C). Enantiomeric excess was determined by UPC<sup>2</sup> using Chiralpak AD-3 column,  $\text{CO}_2/\text{MeOH}$  95:5, flow rate 2mL/min, **3j**: 96%,  $t_{\text{minor}} = 3.267$  min,  $t_{\text{major}} = 3.713$  min; **3j'**: 89%,  $t_{\text{minor}} = 3.462$  min,  $t_{\text{major}} = 4.088$  min.  $[\alpha]_{\text{D}}^{24} = -6.0$  (c 1.0, AcOEt, **3j**);  $[\alpha]_{\text{D}}^{24} = -92.0$  (c 0.5, AcOEt, **3j'**).  $^1\text{H}$  NMR (400 MHz,  $(\text{CD}_3)_2\text{SO}$ ) **3j**  $\delta$  9.33 (s, 1H), 7.58 (d,  $J = 8.3$  Hz, 2H), 7.49 (d,  $J = 8.4$  Hz, 2H), 7.35 (d,  $J = 7.5$  Hz, 2H), 7.24–7.16 (m, 3H), 7.08 (t,  $J = 7.3$  Hz, 1H), 6.51 (d,  $J = 3.6$  Hz, 1H), 4.65 (d,  $J = 11.8$  Hz, 1H), 4.06 (q,  $J = 7.0$  Hz, 2H), 4.03–3.93 (m, 1H), 3.28 (dd,  $J = 17.4, 10.3$  Hz, 1H), 2.83 (dd,  $J = 17.4, 3.9$  Hz, 1H), 1.15 (t,  $J = 7.1$  Hz, 3H); **3j'**  $\delta$  9.51 (s, 1H), 7.49 (d,  $J = 3.5$  Hz, 1H), 7.31 (d,  $J = 8.4$  Hz, 2H), 7.18 (dd,  $J = 10.6, 8.0$  Hz, 4H), 7.11 (t,  $J = 7.5$  Hz, 2H), 7.02 (t,  $J = 7.3$  Hz, 1H), 6.76 (d,  $J = 3.6$  Hz, 1H), 4.69 (d,  $J = 11.5$  Hz, 1H), 4.10 (q,  $J = 7.1$  Hz, 2H), 4.05–3.96 (m, 1H), 3.42–3.35 (m, 1H), 3.07 (dd,  $J = 17.5, 4.2$  Hz, 1H), 1.17 (t,  $J = 7.1$  Hz, 3H).  $^{13}\text{C}$  NMR (100 MHz,  $(\text{CD}_3)_2\text{SO}$ ) **3j**  $\delta$  192.0, 177.4, 162.1, 159.9, 151.1, 141.7, 139.0, 131.8, 130.7, 128.1, 126.6, 120.7, 110.2, 61.7, 49.6, 44.1, 43.3, 13.7;  $^{13}\text{C}$  NMR (150 MHz,  $(\text{CD}_3)_2\text{SO}$ ) **3j'**  $\delta$  191.7, 177.7, 162.0, 159.9, 151.9, 140.9, 138.7, 131.0, 130.7, 128.3, 128.0, 126.5, 119.8, 110.6, 61.7, 49.2, 44.1, 43.9, 13.7. HRMS(ESI)  $m/z$  ( $\text{M}+\text{Na}$ ) $^+$ : calculated for  $\text{C}_{24}\text{H}_{21}\text{BrO}_5\text{Na}$ : 491.0465, found: 491.0469 (**3j**); 491.0465 (**3j'**). IR (neat)  $\text{cm}^{-1}$ : **3j** 2961, 2926, 1726, 1675, 1489, 1277, 1071, 799, 759, 701; **3j'** 2922, 2851, 1724, 1674, 1384, 1069, 1004, 799.

ethyl (4*R*,5*S*)-5-(2-fluorophenyl)-5-(5-formylfuran-2-yl)-2-oxo-4-phenylpentanoate (**3k**)

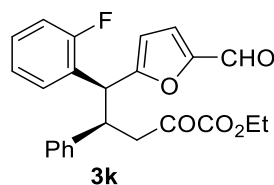

The reaction was carried out following the general procedure to give two diastereoisomers with 63% yield and 79:21 dr as a light yellow oil. Enantiomeric excess of the major isomer **3k** was determined by HPLC using Chiralpak IC-3 column, Hexane/*i*PrOH 80:20, flow rate 1mL/min, 96%,  $t_{\text{minor}} = 15.145$  min,  $t_{\text{major}} = 17.011$  min; Enantiomeric excess of the minor isomer **3k'** was determined by UPC<sup>2</sup> using Chiralpak IG-3 column,  $\text{CO}_2/\text{MeOH}$  95:5, flow rate

2mL/min, 90%,  $t_{\text{minor}} = 2.366$  min,  $t_{\text{major}} = 2.560$  min.  $[\alpha]_{\text{D}}^{24} = -20.0$  (c 1.0, AcOEt, **3k**);  $[\alpha]_{\text{D}}^{24} = -50.0$  (c 0.5, AcOEt, **3k'**). **<sup>1</sup>H NMR** (400 MHz, (CD<sub>3</sub>)<sub>2</sub>SO) **3k**  $\delta$  9.34 (s, 1H), 7.64 (td,  $J = 7.9, 1.8$  Hz, 1H), 7.41–7.31 (m, 3H), 7.28–7.17 (m, 5H), 7.13–7.07 (m, 1H), 6.49 (d,  $J = 3.6$  Hz, 1H), 4.80 (d,  $J = 11.8$  Hz, 1H), 4.15–4.02 (m, 3H), 3.34–3.25 (m, 1H), 2.89 (dd,  $J = 17.3, 3.9$  Hz, 1H), 1.15 (t,  $J = 7.1$  Hz, 3H); **3k'**  $\delta$  9.51 (s, 1H), 7.54–7.46 (m, 2H), 7.21 (d,  $J = 7.3$  Hz, 2H), 7.14–7.06 (m, 3H), 7.06–6.99 (m, 2H), 6.93–6.81 (m, 1H), 6.79 (d,  $J = 3.6$  Hz, 1H), 4.92 (d,  $J = 11.6$  Hz, 1H), 4.11 (q,  $J = 7.1$  Hz, 3H), 3.46–3.38 (m, 1H), 3.13 (dd,  $J = 17.6, 4.2$  Hz, 1H), 1.18 (t,  $J = 7.1$  Hz, 3H). **<sup>13</sup>C NMR** (100 MHz, (CD<sub>3</sub>)<sub>2</sub>SO) **3k**  $\delta$  191.8, 177.5, 161.1, 159.8, 158.9, 151.1, 141.3, 130.1 (d,  $J = 3.4$  Hz), 129.7 (d,  $J = 8.4$  Hz), 128.1 (d,  $J = 10.6$  Hz), 126.8, 125.9 (d,  $J = 14.0$  Hz), 125.1 (d,  $J = 3.3$  Hz), 116.0, 115.8, 110.6, 61.7, 43.5, 43.1 (d,  $J = 12.1$  Hz), 13.7; **3k'**  $\delta$  191.8, 177.8, 161.2, 160.7, 160.0, 158.3, 151.9, 140.9, 130.2 (d,  $J = 3.8$  Hz), 128.9 (d,  $J = 8.2$  Hz), 128.0 (d,  $J = 14.0$  Hz), 126.6, 126.0 (d,  $J = 14.3$  Hz), 124.4, 115.3, 115.1, 110.8, 61.8, 44.0, 43.3, 42.7, 13.7. **<sup>19</sup>F NMR** (376 MHz, (CD<sub>3</sub>)<sub>2</sub>SO) **3k**  $\delta$  -116.78. **3k'**  $\delta$  -117.16. **HRMS**(ESI)  $m/z$  (M+Na)<sup>+</sup>: calculated for C<sub>24</sub>H<sub>21</sub>FO<sub>5</sub>Na: 431.1265, found: 431.1268 (**3k**); 431.1266 (**3k'**). **IR** (neat) cm<sup>-1</sup>: **3k** 2962, 1725, 1675, 1260, 1069, 1021, 799, 756; **3k'** 2924, 2852, 1726, 1677, 1384, 1261, 1070, 1023, 802, 758, 700.

ethyl (4*R*,5*S*)-5-(4-fluorophenyl)-5-(5-formylfuran-2-yl)-2-oxo-4-phenylpentanoate (**3l**)

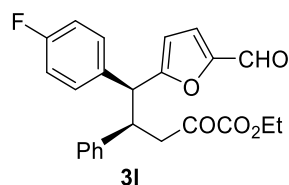

The reaction was carried out following the general procedure to give two diastereoisomers with 73% yield and 82:18 dr as a light yellow oil. Enantiomeric excess was determined by UPC<sup>2</sup> using Chiralpak IG-3 column, CO<sub>2</sub>/MeOH 95:5, flow rate 2mL/min, the major isomer **3l**: 96%,  $t_{\text{minor}} = 2.462$  min,  $t_{\text{major}} = 2.964$  min; the minor isomer **3l'**: 89%,  $t_{\text{minor}} = 2.570$  min,  $t_{\text{major}} = 2.783$  min.  $[\alpha]_{\text{D}}^{24} = -8.0$  (c 1.0, AcOEt, **3l**);  $[\alpha]_{\text{D}}^{24} = -58.0$  (c 0.5, AcOEt, **3l'**). **<sup>1</sup>H NMR** (400 MHz, (CD<sub>3</sub>)<sub>2</sub>SO)  $\delta$  **3l** 9.33 (s, 1H), 7.60–7.55 (m, 2H), 7.37–7.32 (m, 2H), 7.25–7.16 (m, 6H), 7.08 (t,  $J = 7.3$  Hz, 1H), 6.49 (d,  $J = 3.6$  Hz, 1H), 4.65 (d,  $J = 11.8$  Hz, 1H), 4.06 (q,  $J = 7.0$  Hz, 2H), 4.02–3.94 (m, 1H), 3.26 (dd,  $J = 17.4, 10.2$  Hz, 1H), 2.83 (dd,  $J = 17.3, 4.1$  Hz, 1H), 1.14 (t,  $J = 7.1$  Hz, 3H); **3l'**  $\delta$  9.52 (s, 1H), 7.49 (d,  $J = 3.5$  Hz, 1H), 7.26–7.20 (m, 2H), 7.17 (d,  $J = 7.2$  Hz, 2H), 7.11 (t,  $J = 7.5$  Hz, 2H), 7.02 (t,  $J = 7.2$  Hz, 1H), 6.93 (t,  $J = 8.9$  Hz, 2H), 6.76 (d,  $J = 3.6$  Hz, 1H), 4.68 (d,  $J = 11.4$  Hz, 1H), 4.10 (q,  $J = 7.1$  Hz, 2H), 4.04–3.93 (m, 1H), 3.43–3.35 (m, 1H), 3.06 (dd,  $J = 17.5, 4.2$  Hz, 1H), 1.18 (t,  $J = 7.1$  Hz, 3H). **<sup>13</sup>C NMR** (100 MHz, (CD<sub>3</sub>)<sub>2</sub>SO) **3l**  $\delta$  192.1, 177.41, 162.5, 160.2, 159.9, 151.1, 141.7, 135.7, 130.5 (d,  $J = 8.2$  Hz), 128.1 (d,  $J = 3.5$  Hz), 126.6, 115.5, 115.6, 110.1, 61.7, 49.5, 44.4, 43.4, 13.7; **<sup>13</sup>C NMR** (150 MHz, CDCl<sub>3</sub>) **3l'**  $\delta$  191.8, 177.7, 162.4, 161.5, 159.9, 151.9, 141.0, 135.4 (d,  $J = 2.9$  Hz), 130.3 (d,  $J = 8.0$  Hz), 128.3, 128.0, 126.4, 115.0, 114.8, 110.5, 61.7, 49.1, 44.4, 43.9, 13.7. **<sup>19</sup>F NMR** (376 MHz, (CD<sub>3</sub>)<sub>2</sub>SO) **3l**  $\delta$  -115.08. **3l'**  $\delta$  -115.96. **HRMS**(ESI)  $m/z$  (M+Na)<sup>+</sup>: calculated for C<sub>24</sub>H<sub>21</sub>FO<sub>5</sub>Na: 431.1265, found: 431.1267 (**3l**); 431.1265 (**3l'**). **IR** (neat) cm<sup>-1</sup>: **3l** 3117, 2962, 1726, 1508, 1226, 1069, 800, 756, 701; **3l'** 2962, 2925, 1726, 1676, 1508, 1260, 1069, 1019, 799.

ethyl (4*R*,5*S*)-5-(3,5-dimethylphenyl)-5-(5-formylfuran-2-yl)-2-oxo-4-phenylpentanoate (**3m**)

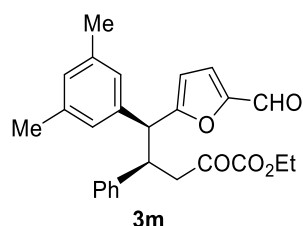

The reaction was carried out following the general procedure to give two diastereoisomers with 79% yield and 64:36 dr as a light yellow oil. Enantiomeric excess was determined by UPC<sup>2</sup> using Chiralpak IG-3 column, CO<sub>2</sub>/MeOH 95:5, flow rate 2mL/min, the major isomer **3m**: 90%,  $t_{\text{minor}} = 1.636$  min,  $t_{\text{major}} = 1.963$  min; the minor isomer **3m'**: 88%,  $t_{\text{minor}} = 2.174$  min,  $t_{\text{major}} = 2.487$  min.  $[\alpha]_{\text{D}}^{27} = +1.0$  (c 1.0, AcOEt, **3m**);  $[\alpha]_{\text{D}}^{27} = -90.0$  (c 0.5, AcOEt, **3m'**). <sup>1</sup>H NMR (400 MHz, (CD<sub>3</sub>)<sub>2</sub>SO) **3m**  $\delta$  9.32 (s, 1H), 7.35 (d,  $J = 7.2$  Hz, 2H), 7.23–7.15 (m, 3H), 7.12 (s, 2H), 7.07 (t,  $J = 7.3$  Hz, 1H), 6.90 (s, 1H), 6.50 (d,  $J = 3.6$  Hz, 1H), 4.49 (d,  $J = 11.9$  Hz, 1H), 4.05 (q,  $J = 7.1$  Hz, 2H), 4.02–3.94 (m, 1H), 3.24 (dd,  $J = 17.2, 10.4$  Hz, 1H), 2.83 (dd,  $J = 17.2, 4.0$  Hz, 1H), 2.26 (s, 6H), 1.14 (t,  $J = 7.1$  Hz, 3H); **3m'**  $\delta$  9.50 (s, 1H), 7.47 (d,  $J = 3.5$  Hz, 1H), 7.19 (d,  $J = 7.2$  Hz, 2H), 7.11 (t,  $J = 7.5$  Hz, 2H), 7.02 (t,  $J = 7.3$  Hz, 1H), 6.81 (s, 2H), 6.71 (d,  $J = 3.6$  Hz, 1H), 6.65 (s, 1H), 4.54 (d,  $J = 11.3$  Hz, 1H), 4.10 (q,  $J = 7.1$  Hz, 2H), 4.07–3.98 (m, 1H), 3.37 (d,  $J = 9.8$  Hz, 1H), 3.31 (s, 1H), 3.04 (dd,  $J = 17.4, 4.2$  Hz, 1H), 2.09 (s, 6H), 1.18 (t,  $J = 7.1$  Hz, 3H). <sup>13</sup>C NMR (100 MHz, (CD<sub>3</sub>)<sub>2</sub>SO) **3m**  $\delta$  192.2, 177.3, 163.0, 159.9, 150.9, 141.9, 139.4, 137.9, 128.8, 128.1, 126.5, 126.1, 109.9, 61.7, 50.4, 44.2, 43.6, 21.0, 13.7; **3m'**  $\delta$  191.9, 177.6, 162.9, 160.0, 151.7, 141.2, 138.9, 136.9, 128.3, 128.1, 127.9, 126.3, 126.2, 110.3, 61.7, 49.8, 43.9, 20.8, 13.7. HRMS(ESI)  $m/z$  (M+Na)<sup>+</sup>: calculated for C<sub>26</sub>H<sub>26</sub>O<sub>5</sub>Na: 441.1672, found: 441.1677 (**3m**); 441.1674 (**3m'**). IR (neat) cm<sup>-1</sup>: **3m** 2963, 1726, 1675, 1511, 1260, 1023, 799; **3m'** 2921, 1726, 1675, 1509, 1384, 1260, 1022, 801, 698.

ethyl(4*R*,5*S*)-5-(3,5-di-*tert*-butylphenyl)-5-(5-formylfuran-2-yl)-2-oxo-4-phenylpentanoate  
(**3n**)

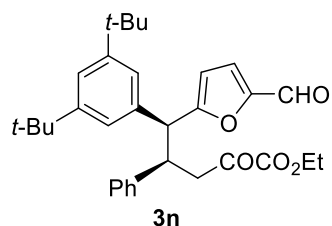

The reaction was carried out following the general procedure to give two diastereoisomers with 92% yield and 43:57 dr. The minor isomer **3n** as white solid (m.p. = 162 – 163 °C); The major isomer **3n'** as a white solid (m.p. = 159 – 160 °C). Enantiomeric excess of **3n** was determined by UPC<sup>2</sup> using Trefoil<sup>TM</sup> CEL1 column, CO<sub>2</sub>/MeOH 95:5, flow rate 2mL/min, 81%,  $t_{\text{minor}} = 1.110$  min,  $t_{\text{major}} = 1.225$  min; Enantiomeric excess of **3n'** was determined by HPLC using Chiralpak ID-3 column, Hexane/*i*PrOH 90:10, flow rate 1mL/min, 90%,  $t_{\text{minor}} = 6.621$  min,  $t_{\text{major}} = 7.372$  min.  $[\alpha]_{\text{D}}^{28} = +1.0$  (c 1.0, AcOEt, **3n**);  $[\alpha]_{\text{D}}^{28} = -88.0$  (c 1.0, AcOEt, **3n'**). <sup>1</sup>H NMR (400 MHz, CDCl<sub>3</sub>) **3n**  $\delta$  9.44 (s, 1H), 7.33 (t,  $J = 1.7$  Hz, 1H), 7.24 (d,  $J = 1.7$  Hz, 2H), 7.19 (d,  $J = 4.3$  Hz, 4H), 7.16 – 7.08 (m, 1H), 6.94 (d,  $J = 3.6$  Hz, 1H), 6.11 (d,  $J = 3.6$  Hz, 1H), 4.29 (d,  $J = 11.1$  Hz, 1H), 4.18–4.04 (m, 3H), 3.22 (dd,  $J = 17.5, 9.5$  Hz, 1H), 2.99 (dd,  $J = 17.5, 4.4$  Hz, 1H), 1.33 (s, 18H), 1.23 (t,  $J = 7.1$  Hz, 3H); **3n'**  $\delta$  9.60 (s, 1H), 7.18 (d,  $J = 3.6$  Hz, 1H), 7.11 (t,  $J = 1.7$  Hz, 1H), 7.10 – 7.02 (m, 3H), 6.95–6.90 (m, 2H), 6.86 (d,  $J = 1.7$  Hz, 2H), 6.43

(d,  $J = 3.6$  Hz, 1H), 4.28 (d,  $J = 10.3$  Hz, 1H), 4.21 (q,  $J = 7.2$  Hz, 2H), 4.04 (td,  $J = 9.5, 5.1$  Hz, 1H), 3.42 (dd,  $J = 17.6, 9.0$  Hz, 1H), 3.16 (dd,  $J = 17.6, 5.1$  Hz, 1H), 1.28 (t,  $J = 7.1$  Hz, 3H), 1.18 (s, 18H).  $^{13}\text{C NMR}$  (100 MHz,  $\text{CDCl}_3$ ) **3n**  $\delta$  192.3, 162.7, 160.4, 151.7, 151.4, 141.2, 137.3, 128.4, 127.9, 127.0, 122.9, 121.6, 110.0, 62.3, 52.6, 45.1, 43.7, 34.9, 31.4, 13.8; **3n'**  $\delta$  192.3, 177.3, 162.9, 160.6, 152.1, 150.5, 140.3, 136.9, 128.3, 128.1, 126.7, 123.1, 120.6, 110.4, 62.5, 52.2, 45.6, 43.7, 34.6, 31.3, 13.9. **HRMS**(ESI)  $m/z$  ( $\text{M}+\text{Na}$ ) $^+$ : calculated for  $\text{C}_{32}\text{H}_{38}\text{O}_5\text{Na}$ : 525.2611, found: 525.2615 (**3n**); 525.2611 (**3n'**). **IR** (neat)  $\text{cm}^{-1}$ : **3n** 2961, 2866, 1723, 1675, 1384, 1260, 1070, 1022, 800, 759, 701; **3n'** 2962, 2866, 1725, 1677, 1384, 1260, 1068, 1021, 802, 698.

ethyl (4*R*,5*S*)-5-(5-formylfuran-2-yl)-5-(naphthalen-2-yl)-2-oxo-4-phenylpentanoate (**3o**)

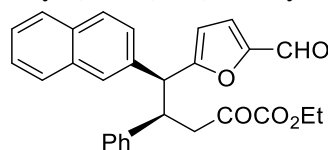

**3o**

The reaction was carried out following the general procedure to give two diastereoisomers with 71% yield and 80:20 dr. The major isomer **3o** was isolated as a white solid (m.p. = 72 – 74 °C); The minor isomer **3o'** was isolated as a white solid (m.p. = 152 – 154 °C). Enantiomeric excess of **3o** was determined by HPLC using Chiralpak ID-3 column, Hexane/*i*PrOH 80:20, flow rate 1 mL/min, 96%,  $t_{\text{minor}} = 14.678$  min,  $t_{\text{major}} = 16.231$  min; Enantiomeric excess of **3o'** was determined by UPC<sup>2</sup> using Chiralpak IG-3 column,  $\text{CO}_2/\text{MeOH}$  95:5, flow rate 2mL/min, **3o'**: 81%,  $t_{\text{minor}} = 2.669$  min,  $t_{\text{major}} = 3.098$  min.  $[\alpha]_{\text{D}}^{27} = +34.0$  (c 1.0, AcOEt, **3o**);  $[\alpha]_{\text{D}}^{27} = -58.0$  (c 1.0, AcOEt, **3o'**).  $^1\text{H NMR}$  (400 MHz,  $\text{CDCl}_3$ ) **3o**  $\delta$  9.42 (s, 1H), 7.90–7.80 (m, 4H), 7.60 (dd,  $J = 8.5, 1.8$  Hz, 1H), 7.55–7.45 (m, 2H), 7.30–7.27 (m, 2H), 7.25 – 7.19 (m, 2H), 7.19–7.12 (m, 1H), 6.93 (d,  $J = 3.6$  Hz, 1H), 6.14 (d,  $J = 3.6$  Hz, 1H), 4.49 (d,  $J = 11.7$  Hz, 1H), 4.26 (ddd,  $J = 11.7, 9.6, 4.4$  Hz, 1H), 4.09–3.92 (m, 2H), 3.27 (dd,  $J = 17.6, 9.6$  Hz, 1H), 3.00 (dd,  $J = 17.6, 4.4$  Hz, 1H), 1.14 (t,  $J = 7.1$  Hz, 3H); **3o'**  $\delta$  9.59 (s, 1H), 7.74–7.62 (m, 3H), 7.56 (s, 1H), 7.45–7.36 (m, 2H), 7.33 (dd,  $J = 8.5, 1.8$  Hz, 1H), 7.17 (d,  $J = 3.6$  Hz, 1H), 7.08 (d,  $J = 4.3$  Hz, 4H), 7.04 – 6.98 (m, 1H), 6.45 (d,  $J = 3.6$  Hz, 1H), 4.54 (d,  $J = 10.8$  Hz, 1H), 4.33–4.24 (m, 1H), 4.21 (qd,  $J = 7.5, 5.5$  Hz, 2H), 3.43 (dd,  $J = 17.6, 8.9$  Hz, 1H), 3.22 (dd,  $J = 17.6, 4.9$  Hz, 1H), 1.28 (t,  $J = 7.2$  Hz, 3H).  $^{13}\text{C NMR}$  (100 MHz,  $\text{CDCl}_3$ ) **3o**  $\delta$  192.0, 177.1, 162.1, 160.2, 151.8, 141.1, 135.9, 133.4, 132.8, 129.2, 128.6, 127.9, 127.9, 127.7, 127.1, 126.5, 126.3, 125.8, 110.1, 62.4, 52.2, 44.8, 43.9, 13.7; **3o'**  $\delta$  192.0, 177.2, 162.5, 160.4, 152.2, 140.3, 135.7, 133.1, 132.3, 128.4, 128.2, 128.1, 127.7, 127.7, 127.5, 126.9, 126.1, 126.1, 125.9, 110.5, 62.6, 51.6, 44.8, 44.2, 13.9. **HRMS**(ESI)  $m/z$  ( $\text{M}+\text{Na}$ ) $^+$ : calculated for  $\text{C}_{28}\text{H}_{24}\text{O}_5\text{Na}$ : 463.1516, found: 463.1521 (**3o**); 463.1517 (**3o'**). **IR** (neat)  $\text{cm}^{-1}$ : **3o** 3059, 2925, 1724, 1671, 1385, 1261, 1068, 1018, 799, 749, 701; **3o'** 2962, 2924, 1725, 1674, 1507, 1384, 1261, 1069, 1021, 800.

methyl (4*R*,5*S*)-5-(5-formylfuran-2-yl)-2-oxo-4,5-diphenylpentanoate (**4a**)

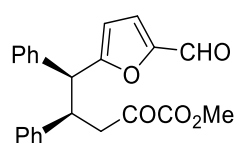

**4a**

The reaction was carried out following the general procedure to give two diastereoisomers with 74% yield and 83:17 dr. The major isomer **4a** was isolated as a white solid (m.p. = 126 – 127 °C); The minor isomer **4a'** was isolated as a colorless oil. Enantiomeric excess of **4a** was determined by UPC<sup>2</sup> using Chiralpak IG-3 column, CO<sub>2</sub>/MeOH 95:5, flow rate 2mL/min, 96%,  $t_{\text{minor}} = 3.858$  min,  $t_{\text{major}} = 4.265$  min; Enantiomeric excess of **4a'** was determined by UPC<sup>2</sup> using Chiralpak OD-3 column, CO<sub>2</sub>/MeOH 95:5, flow rate 2mL/min, 89%,  $t_{\text{minor}} = 3.343$  min,  $t_{\text{major}} = 3.700$  min.  $[\alpha]_{\text{D}}^{26} = -8.0$  (c 1.0, AcOEt, **4a**);  $[\alpha]_{\text{D}}^{26} = -51.61$  (c 0.31, AcOEt, **4a'**). <sup>1</sup>H NMR (400 MHz, (CD<sub>3</sub>)<sub>2</sub>SO) **4a**  $\delta$  9.33 (s, 1H), 7.57–7.50 (m, 2H), 7.41–7.34 (m, 4H), 7.27 (t,  $J = 7.3$  Hz, 1H), 7.23–7.16 (m, 3H), 7.08 (t,  $J = 7.3$  Hz, 1H), 6.50 (d,  $J = 3.6$  Hz, 1H), 4.60 (d,  $J = 11.8$  Hz, 1H), 4.08–3.95 (m, 1H), 3.60 (s, 3H), 3.31 (dd,  $J = 17.7, 10.6$  Hz, 1H), 2.82 (dd,  $J = 17.6, 3.7$  Hz, 1H); **4a'**  $\delta$  9.51 (s, 1H), 7.48 (d,  $J = 3.5$  Hz, 1H), 7.24–7.15 (m, 4H), 7.10 (q,  $J = 7.7$  Hz, 4H), 7.05–6.96 (m, 2H), 6.75 (d,  $J = 3.6$  Hz, 1H), 4.64 (d,  $J = 11.4$  Hz, 1H), 4.02 (td,  $J = 9.8, 4.1$  Hz, 1H), 3.66 (s, 3H), 3.39 (dd,  $J = 17.8, 9.9$  Hz, 1H), 3.08 (dd,  $J = 17.7, 4.1$  Hz, 1H). <sup>13</sup>C NMR (100 MHz, (CD<sub>3</sub>)<sub>2</sub>SO) **4a**  $\delta$  191.7, 177.4, 162.7, 160.3, 151.0, 141.8, 139.5, 128.9, 128.5, 128.1, 128.03, 127.4, 126.6, 110.0, 52.5, 50.4, 44.1, 43.5; **4a'**  $\delta$  191.4, 177.7, 162.7, 160.4, 151.8, 141.2, 139.2, 128.4, 128.3, 128.1, 127.9, 126.6, 126.3, 110.4, 52.5, 50.0, 44.1, 44.1. HRMS(ESI)  $m/z$  (M+Na)<sup>+</sup>: calculated for C<sub>23</sub>H<sub>20</sub>O<sub>5</sub>Na: 399.1203, found: 399.1209 (**4a**); 399.1203 (**4a'**). IR (neat) cm<sup>-1</sup>: **4a** 2960, 1727, 1671, 1384, 1260, 1021, 798, 760, 700; **4a'** 2924, 1727, 1672, 1384, 1260, 1088, 1021, 799.

isopropyl (4*R*,5*S*)-5-(5-formylfuran-2-yl)-2-oxo-4,5-diphenylpentanoate (**4b**)

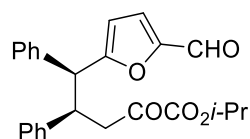

**4b**

The reaction was carried out following the general procedure to give two diastereoisomers with 47% yield and 67:33 dr. The major isomer **4b** was isolated as a white solid (m.p. = 139 – 140 °C); The minor isomer **4b'** was isolated as a white solid (m.p. = 124 – 125 °C). Enantiomeric excess was determined by UPC<sup>2</sup> using Chiralpak IG-3 column, CO<sub>2</sub>/MeOH 95:5, flow rate 2mL/min, **4b**: 95%,  $t_{\text{minor}} = 2.849$  min,  $t_{\text{major}} = 3.218$  min; **4b'**: 88%,  $t_{\text{minor}} = 2.596$  min,  $t_{\text{major}} = 3.006$  min.  $[\alpha]_{\text{D}}^{26} = -5.0$  (c 1.0, AcOEt, **4b**);  $[\alpha]_{\text{D}}^{26} = -90.0$  (c 0.5, AcOEt, **4b'**). <sup>1</sup>H NMR (600 MHz, (CD<sub>3</sub>)<sub>2</sub>SO) **4b**  $\delta$  9.34 (d,  $J = 6.5$  Hz, 1H), 7.54 (d,  $J = 7.3$  Hz, 2H), 7.40–7.34 (m, 4H), 7.28 (t,  $J = 7.4$  Hz, 1H), 7.22–7.17 (m, 3H), 7.09 (t,  $J = 7.3$  Hz, 1H), 6.49 (d,  $J = 3.6$  Hz, 1H), 4.87 – 4.77 (m, 1H), 4.61 (d,  $J = 11.8$  Hz, 1H), 4.01 (td,  $J = 11.1, 3.9$  Hz, 1H), 3.26 (dd,  $J = 17.1, 10.5$  Hz, 1H), 2.80 (dd,  $J = 17.1, 3.9$  Hz, 1H), 1.13 (dd,  $J = 6.2, 1.3$  Hz, 6H); **4b'**  $\delta$  9.52 (s, 1H), 7.48 (d,  $J = 3.5$  Hz, 1H), 7.21 (d,  $J = 7.3$  Hz, 2H), 7.18 (d,  $J = 7.3$  Hz, 2H), 7.13 – 7.07 (m, 4H), 7.05 – 6.98 (m, 2H), 6.75 (d,  $J = 3.5$  Hz, 1H), 4.92 – 4.85 (m, 1H), 4.65 (d,  $J = 11.4$  Hz, 1H), 4.03 (td,  $J = 10.6, 4.2$  Hz, 1H), 3.40–3.33 (m, 1H), 3.06 (dd,  $J = 17.2, 4.2$  Hz, 1H), 1.18 (dd,  $J = 6.2, 3.5$  Hz, 6H). <sup>13</sup>C NMR (150 MHz, (CD<sub>3</sub>)<sub>2</sub>SO) **4b**  $\delta$  192.6, 177.3, 162.7, 159.5, 151.1, 141.7, 139.5, 128.9, 128.5, 128.1, 128.1, 127.4, 126.6, 110.0, 69.8, 50.5, 44.5, 43.4, 21.2, 21.2; **4b'**  $\delta$  192.2, 177.6, 162.6, 159.5, 151.8, 141.0, 139.1, 128.4, 128.3, 128.2, 127.9, 126.6, 126.4, 110.4, 69.9, 50.0, 44.4, 43.9, 21.2. HRMS(ESI)  $m/z$  (M+Na)<sup>+</sup>: calculated for C<sub>25</sub>H<sub>24</sub>O<sub>5</sub>Na: 427.1516, found: 427.1519 (**4b**); 427.1516 (**4b'**). IR (neat) cm<sup>-1</sup>: **4b** 2925, 1716, 1670, 1280, 1068, 1023, 759, 700; **4b'** 2963, 1720, 1673, 1384, 1261, 1022, 800, 762, 698.



cyclohexyl (4*R*,5*S*)-5-(5-formylfuran-2-yl)-2-oxo-4,5-diphenylpentanoate (**4c**)

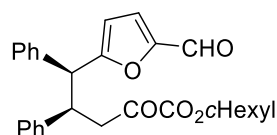

**4c**

The reaction was carried out following the general procedure to give two diastereoisomers with 50% yield and 71:29 dr. The major isomer **4c** was isolated as a white solid (m.p. = 143 – 144 °C); The minor isomer **4c'** was isolated as a white solid (m.p. = 108 – 110 °C). Enantiomeric excess was determined by UPC<sup>2</sup> using Chiralpak IG-3 column, CO<sub>2</sub>/MeOH 90:10, flow rate 2mL/min, **4c**: 94%, *t*<sub>minor</sub> = 3.112 min, *t*<sub>major</sub> = 3.481 min.; **4c'**: 87%, *t*<sub>minor</sub> = 2.482 min, *t*<sub>major</sub> = 2.878 min. [ $\alpha$ ]<sub>D</sub><sup>23</sup> = -9.0 (c 1.0, AcOEt, **4c**); [ $\alpha$ ]<sub>D</sub><sup>24</sup> = -45.0 (c 1.0, AcOEt, **4c'**). <sup>1</sup>H NMR (400 MHz, (CD<sub>3</sub>)<sub>2</sub>SO) **4c**  $\delta$  9.33 (s, 1H), 7.53 (d, *J* = 7.3 Hz, 2H), 7.41–7.31 (m, 4H), 7.28 (t, *J* = 7.3 Hz, 1H), 7.24–7.15 (m, 3H), 7.08 (t, *J* = 7.3 Hz, 1H), 6.48 (d, *J* = 3.6 Hz, 1H), 4.71–4.55 (m, 2H), 4.00 (td, *J* = 11.1, 3.9 Hz, 1H), 3.24 (dd, *J* = 17.0, 10.5 Hz, 1H), 2.80 (dd, *J* = 17.0, 3.9 Hz, 1H), 1.69 (s, 2H), 1.59 (d, *J* = 6.3 Hz, 2H), 1.49 – 1.40 (m, 1H), 1.39 – 1.20 (m, 1H); **4c'**  $\delta$  9.51 (s, 1H), 7.48 (d, *J* = 3.5 Hz, 1H), 7.23–7.15 (m, 4H), 7.10 (dd, *J* = 15.9, 7.7 Hz, 4H), 7.05 – 6.97 (m, 2H), 6.75 (d, *J* = 3.6 Hz, 1H), 4.74–4.60 (m, 2H), 4.08–3.94 (m, 1H), 3.41 – 3.29 (m, 1H), 3.05 (dd, *J* = 17.1, 4.3 Hz, 1H), 1.81 – 1.69 (m, 2H), 1.67–1.57 (m, 2H), 1.50–1.42 (m, 1H), 1.41–1.32 (m, 3H), 1.31–1.22 (m, 2H). <sup>13</sup>C NMR (100 MHz, (CD<sub>3</sub>)<sub>2</sub>SO) **4c**  $\delta$  192.6, 177.4, 162.7, 159.3, 151.1, 141.7, 139.5, 128.9, 128.5, 128.10, 128.0, 127.4, 126.6, 110.0, 74.1, 50.5, 44.5, 43.5, 30.6, 30.5, 24.6, 22.9; **4c'**  $\delta$  192.3, 177.7, 162.6, 159.4, 151.8, 141.0, 139.1, 128.5, 128.3, 128.2, 127.9, 126.6, 126.4, 110.5, 74.2, 50.0, 44.5, 44.0, 30.6, 30.6, 24.7, 22.9. HRMS(ESI) *m/z* (M+Na)<sup>+</sup>: calculated for C<sub>28</sub>H<sub>28</sub>O<sub>5</sub>Na: 467.1829, found: 467.1834 (**4c**); 467.1830 (**4c'**). IR (neat) cm<sup>-1</sup>: **4c** 2925, 2853, 1717, 1672, 2384, 1258, 1068, 1024, 799, 758, 699; **4c'** 2932, 2857, 1720, 1676, 1511, 1384, 1260, 1021, 799, 698.

benzyl (4*R*,5*S*)-5-(5-formylfuran-2-yl)-2-oxo-4,5-diphenylpentanoate (**4d**)

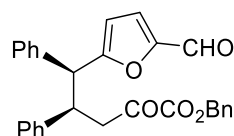

**4d**

The reaction was carried out following the general procedure to give two diastereoisomers with 74% yield and 81:19 dr. The major isomer **4d** was isolated as a white solid (m.p. = 120 – 122 °C); The minor isomer **4d'** was isolated as a white solid (m.p. = 121 – 122 °C). Enantiomeric excess was determined by UPC<sup>2</sup> using Chiralpak IG-3 column, CO<sub>2</sub>/MeOH 90:10, flow rate 2mL/min, **4d**: 97%, *t*<sub>minor</sub> = 3.800 min, *t*<sub>major</sub> = 4.323 min.; **4d'**: 91%, *t*<sub>minor</sub> = 3.701 min, *t*<sub>major</sub> = 4.316 min. [ $\alpha$ ]<sub>D</sub><sup>27</sup> = -3.0 (c 1.0, AcOEt, **4d**); [ $\alpha$ ]<sub>D</sub><sup>27</sup> = -75.0 (c 0.2, AcOEt, **4d'**). <sup>1</sup>H NMR (400 MHz, (CD<sub>3</sub>)<sub>2</sub>SO) **4d**  $\delta$  9.33 (s, 1H), 7.50 (d, *J* = 7.2 Hz, 2H), 7.42–7.30 (m, 9H), 7.27 (d, *J* = 7.3 Hz, 1H), 7.22 (d, *J* = 3.6 Hz, 1H), 7.17 (t, *J* = 7.5 Hz, 2H), 7.08 (t, *J* = 7.3 Hz, 1H), 6.47 (d, *J* = 3.6 Hz, 1H), 5.09 (s, 2H), 4.60 (d, *J* = 11.8 Hz, 1H), 4.09–3.95 (m, 1H), 3.28 (dd, *J* = 17.2, 10.5 Hz, 1H), 2.85 (dd, *J* = 17.2, 3.9 Hz, 1H); **4d'**  $\delta$  9.50 (s, 1H), 7.44 (d, *J* = 3.5 Hz, 1H), 7.42–7.34 (m, 5H), 7.21–6.96 (m, 11H), 6.72 (d, *J* = 3.6 Hz, 1H), 5.15 (s, 2H), 4.64 (d, *J* = 11.4 Hz, 1H), 4.08 – 3.95 (m, 1H), 3.44–3.35 (m, 1H), 3.11 (dd, *J* = 17.3, 4.2 Hz, 1H). <sup>13</sup>C NMR

(100 MHz, (CD<sub>3</sub>)<sub>2</sub>SO) **4d**  $\delta$  191.8, 177.4, 162.7, 159.6, 151.1, 141.7, 139.5, 134.9, 128.9, 128.5, 128.5, 128.4, 128.4, 128.1, 128.1, 127.4, 126.6, 110.0, 67.0, 50.5, 44.3, 43.7; **4d'**  $\delta$  191.5, 177.7, 162.6, 159.6, 151.8, 141.0, 139.1, 134.9, 128.5, 128.5, 128.3, 128.2, 127.9, 126.6, 126.4, 110.4, 67.1, 50.0, 44.3, 44.2. **HRMS**(ESI)  $m/z$  (M+Na)<sup>+</sup>: calculated for C<sub>29</sub>H<sub>24</sub>O<sub>5</sub>Na: 475.1516, found: 475.1522 (**4d**); 475.1516 (**4d'**). **IR** (neat) cm<sup>-1</sup>: **4d** 3029, 2961, 1724, 1669, 1260, 1060, 798, 754, 697; **4d'** 2922, 2851, 1726, 1675, 1384, 1087, 1003, 698.

ethyl (4*R*,5*S*)-5-(5-formylfuran-2-yl)-4-(2-methoxyphenyl)-2-oxo-5-phenylpentanoate (**4e**)

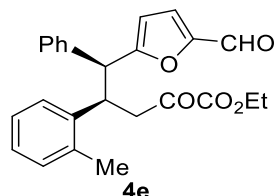

The reaction was carried out following the general procedure to give two diastereoisomers with 69% yield and 88:12 dr as a colorless oil. Enantiomeric excess of the major isomer **4e** was determined by UPC<sup>2</sup> using Chiralpak OD-3 column, CO<sub>2</sub>/MeOH 95:5, flow rate 2mL/min, 95%,  $t_{\text{minor}} = 2.142$  min,  $t_{\text{major}} = 2.327$  min; Enantiomeric excess of the minor isomer **4e'** was determined by UPC<sup>2</sup> using Chiralpak IG-3 column, CO<sub>2</sub>/MeOH 95:5, flow rate 2mL/min, 93%,  $t_{\text{minor}} = 2.552$  min,  $t_{\text{major}} = 2.857$  min.  $[\alpha]_{\text{D}}^{27} = -6.0$  (c 1.0, AcOEt, **4e**);  $[\alpha]_{\text{D}}^{27} = -250.0$  (c 0.2, AcOEt, **4e'**). **<sup>1</sup>H NMR** (600 MHz, (CD<sub>3</sub>)<sub>2</sub>SO) **4e**  $\delta$  9.34 (s, 1H), 7.57 (d,  $J = 7.5$  Hz, 2H), 7.49 (m, 1H), 7.39 (t,  $J = 7.5$  Hz, 2H), 7.29 (t,  $J = 7.3$  Hz, 1H), 7.17 (d,  $J = 3.4$  Hz, 1H), 7.14 – 7.06 (d,  $J = 3.5$  Hz, 1H), 6.96 (d,  $J = 4.0$  Hz, 2H), 6.23 (d,  $J = 2.8$  Hz, 1H), 4.63 (d,  $J = 11.5$  Hz, 1H), 4.26 (td,  $J = 10.9, 3.7$  Hz, 1H), 4.04 (q,  $J = 7.1$  Hz, 2H), 3.27 (dd,  $J = 17.4, 10.1$  Hz, 1H), 2.89 (dd,  $J = 17.4, 3.8$  Hz, 1H), 2.36 (s, 3H), 1.13 (t,  $J = 7.1$  Hz, 3H); **4e'**  $\delta$  9.53 (s, 1H), 7.50 (d,  $J = 3.5$  Hz, 1H), 7.46 (d,  $J = 7.7$  Hz, 1H), 7.15 (d,  $J = 7.3$  Hz, 2H), 7.14 – 7.06 (m, 1H), 7.03 (t,  $J = 7.2$  Hz, 1H), 6.91 (t,  $J = 7.3$  Hz, 1H), 6.85 (d,  $J = 7.4$  Hz, 1H), 6.80 (d,  $J = 3.5$  Hz, 1H), 4.63 (d,  $J = 11.3$  Hz, 1H), 4.26–4.18 (m, 1H), 4.09 (q,  $J = 7.1$  Hz, 2H), 3.37 (dd,  $J = 17.5, 9.5$  Hz, 1H), 3.08 (dd,  $J = 17.5, 4.4$  Hz, 1H), 2.14 (s, 3H), 1.17 (t,  $J = 7.1$  Hz, 3H). **<sup>13</sup>C NMR** (150 MHz, (CD<sub>3</sub>)<sub>2</sub>SO) **4e**  $\delta$  192.2, 177.2, 162.5, 159.9, 151.2, 140.0, 139.4, 135.9, 129.9, 128.9, 128.5, 127.4, 126.4, 126.2, 126.0, 109.6, 61.7, 59.7, 50.5, 44.0, 20.7, 19.0, 13.6; **4e'**  $\delta$  191.8, 177.7, 162.5, 159.9, 151.9, 139.8, 139.1, 135.9, 129.8, 128.2, 128.0, 126.7, 126.1, 125.9, 110.8, 61.7, 50.2, 44.4, 19.4, 13.7. **HRMS**(ESI)  $m/z$  (M+Na)<sup>+</sup>: calculated for C<sub>25</sub>H<sub>24</sub>O<sub>5</sub>Na: 427.1516, found: 427.1520 (**4e**); 427.1516 (**4e'**). **IR** (neat) cm<sup>-1</sup>: **4e** 2963, 2924, 1725, 1674, 1384, 1261, 1071, 1020, 799, 756, 702; **4e'** 2962, 2922, 1725, 1675, 1384, 1262, 1068, 1020.

ethyl (4*R*,5*S*)-5-(5-formylfuran-2-yl)-2-oxo-5-phenyl-4-(*m*-tolyl)pentanoate (**4f**)

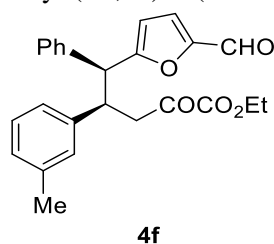

The reaction was carried out following the general procedure to give two diastereoisomers with 76% yield and 83:17 dr. The major isomer **4f** was isolated as a light yellow oil; The minor isomer **4f'** was isolated as a light yellow solid (m.p. = 118 – 119 °C). Enantiomeric excess was

determined by UPC<sup>2</sup> using Chiralpak IG-3 column, CO<sub>2</sub>/MeOH 95:5, flow rate 2mL/min, **4f**: 97%,  $t_{\text{minor}} = 2.593$  min,  $t_{\text{major}} = 2.871$  min.; **4f'**: 87%,  $t_{\text{minor}} = 2.552$  min,  $t_{\text{major}} = 2.943$  min.  $[\alpha]_{\text{D}}^{27} = -10.0$  (c 1.0, AcOEt, **4f**);  $[\alpha]_{\text{D}}^{27} = -155.0$  (c 0.2, AcOEt, **4f'**). <sup>1</sup>H NMR (400 MHz, CDCl<sub>3</sub>) **4f**  $\delta$  9.42 (s, 1H), 7.48–7.41 (m, 2H), 7.38 – 7.33 (m, 2H), 7.30–7.26 (m, 1H), 7.07 (t,  $J = 7.5$  Hz, 1H), 7.01 (d,  $J = 8.3$  Hz, 2H), 6.95–6.91 (m, 2H), 6.09 (d,  $J = 3.6$  Hz, 1H), 4.30 (d,  $J = 11.6$  Hz, 1H), 4.18–4.05 (m, 3H), 3.24 (dd,  $J = 17.5, 9.8$  Hz, 1H), 2.91 (dd,  $J = 17.5, 4.2$  Hz, 1H), 2.25 (s, 3H), 1.23 (t,  $J = 7.1$  Hz, 3H); **4f'**  $\delta$  9.58 (s, 1H), 7.18–7.11 (m, 5H), 7.11–7.07 (m, 1H), 7.00 (t,  $J = 7.9$  Hz, 1H), 6.86 (d,  $J = 7.4$  Hz, 1H), 6.82 (d,  $J = 6.4$  Hz, 2H), 6.41 (d,  $J = 3.6$  Hz, 1H), 4.33 (d,  $J = 10.7$  Hz, 1H), 4.24–4.16 (m, 2H), 4.12 – 4.03 (m, 1H), 3.37 (dd,  $J = 17.6, 8.9$  Hz, 1H), 3.15 (dd,  $J = 17.6, 5.0$  Hz, 1H), 2.19 (s, 3H), 1.28 (t,  $J = 7.2$  Hz, 3H). <sup>13</sup>C NMR (100 MHz, CDCl<sub>3</sub>) **4f**  $\delta$  192.1, 177.0, 162.3, 160.3, 151.8, 140.9, 138.6, 138.0, 129.1, 128.6, 128.5, 128.3, 127.8, 127.8, 124.8, 109.9, 62.3, 52.0, 44.8, 43.8, 21.3, 13.8; **4f'**  $\delta$  192.1, 177.2, 162.6, 160.5, 152.2, 140.3, 138.3, 137.8, 129.0, 128.5, 128.3, 128.1, 127.6, 127.1, 125.1, 110.5, 62.5, 51.6, 45.0, 44.0, 21.3, 13.8. HRMS(ESI)  $m/z$  (M+Na)<sup>+</sup>: calculated for C<sub>25</sub>H<sub>24</sub>O<sub>5</sub>Na: 427.1516, found: 427.1521 (**4f**); 427.1516 (**4f'**). IR (neat) cm<sup>-1</sup>: **4f** 3028, 2962, 1725, 1674, 1511, 1260, 1023, 796, 764, 703; **4f'** 2962, 2923, 1726, 1676, 1384, 1260, 1092, 1020, 799.

ethyl (4*R*,5*S*)-5-(5-formylfuran-2-yl)-2-oxo-5-phenyl-4-(*p*-tolyl)pentanoate (**4g**)

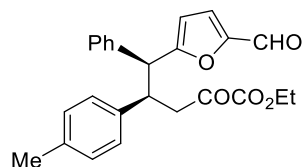

**4g**

The reaction was carried out following the general procedure to give two diastereoisomers with 72% yield and 84:16 dr. as a light yellow oil. Enantiomeric excess was determined by UPC<sup>2</sup> using Chiralpak IG-3 column, CO<sub>2</sub>/MeOH 95:5, flow rate 2mL/min, the major isomer **4g**: 97%,  $t_{\text{minor}} = 4.002$  min,  $t_{\text{major}} = 4.426$  min; the minor isomer **4g'**: 87%,  $t_{\text{minor}} = 3.646$  min,  $t_{\text{major}} = 4.050$  min.  $[\alpha]_{\text{D}}^{27} = -12.0$  (c 1.0, AcOEt, **4g**);  $[\alpha]_{\text{D}}^{27} = -60.0$  (c 0.5, AcOEt, **4g'**). <sup>1</sup>H NMR (400 MHz, (CD<sub>3</sub>)<sub>2</sub>SO) **4g**  $\delta$  9.33 (s, 1H), 7.55–7.48 (m, 2H), 7.37 (t,  $J = 7.6$  Hz, 2H), 7.28 (d,  $J = 7.4$  Hz, 1H), 7.25 – 7.18 (m, 3H), 6.99 (d,  $J = 7.8$  Hz, 2H), 6.50 (d,  $J = 3.6$  Hz, 1H), 4.58 (d,  $J = 11.8$  Hz, 1H), 4.11–4.02 (m, 2H), 3.97 (td,  $J = 11.1, 3.8$  Hz, 1H), 3.22 (dd,  $J = 17.1, 10.6$  Hz, 1H), 2.76 (dd,  $J = 17.1, 3.9$  Hz, 1H), 2.17 (s, 3H), 1.14 (t,  $J = 7.1$  Hz, 3H); **4g'**  $\delta$  9.51 (s, 1H), 7.47 (d,  $J = 3.5$  Hz, 1H), 7.25–7.18 (m, 2H), 7.12 (t,  $J = 7.5$  Hz, 2H), 7.09–7.00 (m, 3H), 6.90 (d,  $J = 7.9$  Hz, 2H), 6.73 (d,  $J = 3.6$  Hz, 1H), 4.62 (d,  $J = 11.4$  Hz, 1H), 4.10 (q,  $J = 7.1$  Hz, 2H), 4.00 (ddd,  $J = 12.3, 9.1, 4.9$  Hz, 1H), 3.30 (d,  $J = 9.9$  Hz, 1H), 3.02 (dd,  $J = 17.3, 4.2$  Hz, 1H), 2.12 (s, 3H), 1.18 (t,  $J = 7.1$  Hz, 3H). <sup>13</sup>C NMR (100 MHz, (CD<sub>3</sub>)<sub>2</sub>SO) **4g**  $\delta$  192.3, 177.4, 162.8, 160.0, 151.0, 139.6, 138.6, 135.5, 128.9, 128.7, 128.4, 127.9, 127.4, 110.0, 61.7, 50.5, 43.9, 43.6, 20.5, 13.7; **4g'**  $\delta$  191.9, 177.7, 162.8, 160.0, 151.8, 139.2, 138.0, 135.2, 128.5, 128.5, 128.2, 128.2, 126.6, 110.4, 61.7, 50.0, 44.1, 43.8, 20.5, 13.7. HRMS(ESI)  $m/z$  (M+Na)<sup>+</sup>: calculated for C<sub>25</sub>H<sub>24</sub>O<sub>5</sub>Na: 427.1516, found: 427.1520 (**4g**); 427.1517 (**4g'**). IR (neat) cm<sup>-1</sup>: **4g** 2922, 1724, 1673, 1513, 1260, 1072, 764, 701; **4g'** 29236, 1724, 1654, 1630, 1384, 1260, 1094, 1003, 798.

ethyl (4*R*,5*S*)-5-(5-formylfuran-2-yl)-4-(2-methoxyphenyl)-2-oxo-5-phenylpentanoate (**4h**)

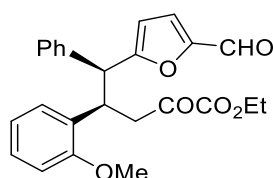

**4h**

The reaction was carried out following the general procedure to give two diastereoisomers with 59% yield and 89:11 dr as a light yellow oil. Enantiomeric excess was determined by UPC<sup>2</sup> using Chiralpak IG-3 column, CO<sub>2</sub>/MeOH 95:5, flow rate 2mL/min, the major isomer **4h**: 96%,  $t_{\text{minor}} = 3.134$  min,  $t_{\text{major}} = 3.559$  min; the minor isomer **4h'**: 92%,  $t_{\text{minor}} = 3.109$  min,  $t_{\text{major}} = 3.510$  min.  $[\alpha]_{\text{D}}^{27} = -1.0$  (c 1.0, AcOEt, **4h**);  $[\alpha]_{\text{D}}^{27} = -38.41$  (c 0.13, AcOEt, **4h'**). <sup>1</sup>H NMR (400 MHz, (CD<sub>3</sub>)<sub>2</sub>SO) **4h**  $\delta$  9.32 (s, 1H), 7.49 (d,  $J = 7.2$  Hz, 2H), 7.42–7.32 (m, 3H), 7.28 (t,  $J = 7.3$  Hz, 1H), 7.22 (d,  $J = 3.6$  Hz, 1H), 7.13–7.07 (m, 1H), 6.88–6.78 (m, 2H), 6.39 (d,  $J = 3.6$  Hz, 1H), 4.70 (d,  $J = 11.7$  Hz, 1H), 4.37 (td,  $J = 11.1, 4.1$  Hz, 1H), 4.14–3.98 (m, 2H), 3.75 (s, 3H), 3.06–2.93 (m, 1H), 2.87 (dd,  $J = 15.5, 4.3$  Hz, 1H), 1.17 (dd,  $J = 7.8, 6.4$  Hz, 3H); <sup>1</sup>H NMR (600 MHz, (CD<sub>3</sub>)<sub>2</sub>SO) **4h'**  $\delta$  9.51 (s, 1H), 7.48 (d,  $J = 3.5$  Hz, 1H), 7.22–7.16 (m, 3H), 7.10 (t,  $J = 7.7$  Hz, 2H), 7.04–6.98 (m, 2H), 6.77–6.73 (m, 2H), 6.71 (td,  $J = 7.4, 0.6$  Hz, 1H), 4.72 (d,  $J = 11.5$  Hz, 1H), 4.40 (td,  $J = 11.2, 4.4$  Hz, 1H), 4.19–4.08 (m, 2H), 3.68 (s, 3H), 3.17 (dd,  $J = 16.0, 9.7$  Hz, 1H), 3.08 (dd,  $J = 16.0, 4.4$  Hz, 1H), 1.21 (t,  $J = 7.1$  Hz, 3H). <sup>13</sup>C NMR (100 MHz, (CD<sub>3</sub>)<sub>2</sub>SO) **4h**  $\delta$  191.9, 177.3, 163.0, 159.7, 156.7, 151.2, 139.5, 128.9, 128.8, 128.6, 127.92, 127.4, 120.3, 111.0, 109.3, 61.6, 55.4, 49.1, 43.0, 20.7, 13.7; <sup>13</sup>C NMR (150 MHz, (CD<sub>3</sub>)<sub>2</sub>SO) **4h'**  $\delta$  192.2, 178.2, 163.3, 160.4, 157.2, 152.3, 139.8, 129.4, 128.9, 128.6, 128.5, 128.2, 127.1, 120.6, 111.3, 110.9, 62.2, 55.7, 49.3, 43.8, 14.2. HRMS(ESI)  $m/z$  (M+Na)<sup>+</sup>: calculated for C<sub>25</sub>H<sub>24</sub>O<sub>6</sub>Na: 443.1465, found: 443.1470 (**4h**); 443.1465 (**4h'**). IR (neat) cm<sup>-1</sup>: **4h** 2961, 1726, 1675, 1494, 1244, 1074, 1025, 799, 755, 702; **4h'** 2961, 2852, 1630, 1384, 1094, 1004, 799.

ethyl (4*R*,5*S*)-5-(5-formylfuran-2-yl)-4-(3-methoxyphenyl)-2-oxo-5-phenylpentanoate (**4i**)

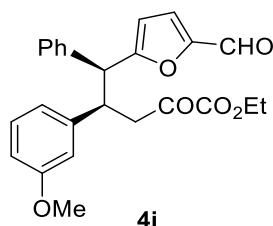

**4i**

The reaction was carried out following the general procedure to give two diastereoisomers with 65% yield and 80:20 dr. The major isomer **4i** was isolated as a light yellow solid (m.p. = 101 – 102 °C); The minor isomer **4i'** was isolated as a light yellow solid (m.p. = 88 – 89 °C). Enantiomeric excess of **4i** was determined by UPC<sup>2</sup> using Chiralpak OD-3 column, CO<sub>2</sub>/MeOH 95:5, flow rate 2mL/min, 97%,  $t_{\text{minor}} = 2.545$  min,  $t_{\text{major}} = 2.964$  min; Enantiomeric excess of **4i'** was determined by UPC<sup>2</sup> using Chiralpak AD-3 column, CO<sub>2</sub>/MeOH 95:5, flow rate 2mL/min, 82%,  $t_{\text{minor}} = 2.141$  min,  $t_{\text{major}} = 2.436$  min.  $[\alpha]_{\text{D}}^{24} = -9.0$  (c 1.0, AcOEt, **4i**);  $[\alpha]_{\text{D}}^{24} = -67.65$  (c 0.34, AcOEt, **4i'**). <sup>1</sup>H NMR (400 MHz, (CD<sub>3</sub>)<sub>2</sub>SO) **4i**  $\delta$  9.35 (s, 1H), 7.53 (d,  $J = 7.2$  Hz, 2H), 7.37 (t,  $J = 7.6$  Hz, 2H), 7.31–7.22 (m, 2H), 7.10 (t,  $J = 7.9$  Hz, 1H), 6.97–6.88 (m, 2H), 6.65 (dd,  $J = 8.1, 2.0$  Hz, 1H), 6.53 (d,  $J = 3.6$  Hz, 1H), 4.62 (d,  $J = 11.8$  Hz, 1H), 4.06 (q,  $J = 7.1$  Hz, 2H), 4.03–3.95 (m, 1H), 3.68 (s, 3H), 3.27 (dd,  $J = 17.2, 10.4$  Hz, 1H), 2.79 (dd,  $J = 17.2,$

3.9 Hz, 1H), 1.14 (t,  $J = 7.1$  Hz, 3H); **4i'**  $\delta$  9.51 (s, 1H), 7.47 (d,  $J = 3.5$  Hz, 1H), 7.24 (d,  $J = 7.4$  Hz, 2H), 7.13 (t,  $J = 7.6$  Hz, 2H), 7.02 (dt,  $J = 24.5, 7.6$  Hz, 2H), 6.79 (s, 1H), 6.77–6.73 (m, 2H), 6.57 (dd,  $J = 8.1, 2.0$  Hz, 1H), 4.66 (d,  $J = 11.3$  Hz, 1H), 4.11 (q,  $J = 7.1$  Hz, 2H), 4.03 (dt,  $J = 3.6$  Hz, 1H), 3.62 (s, 3H), 3.41–3.34 (m, 2H), 3.06 (dd,  $J = 17.3, 4.2$  Hz, 1H), 1.18 (t,  $J = 7.1$  Hz, 3H).  $^{13}\text{C}$  NMR (100 MHz,  $(\text{CD}_3)_2\text{SO}$ ) **4i**  $\delta$  192.2, 177.4, 162.8, 160.0, 159.0, 151.1, 143.4, 139.6, 129.1, 128.9, 128.5, 127.4, 120.3, 113.9, 111.9, 110.0, 61.7, 54.9, 50.3, 44.3, 43.4, 13.7; **4i'**  $\delta$  191.8, 177.6, 162.7, 160.0, 158.8, 151.8, 142.7, 139.2, 128.9, 128.5, 128.2, 126.6, 120.6, 114.1, 111.7, 110.4, 61.7, 54.8, 49.9, 44.3, 43.9, 13.7. HRMS(ESI)  $m/z$  ( $\text{M}+\text{Na}$ ) $^+$ : calculated for  $\text{C}_{25}\text{H}_{24}\text{O}_6\text{Na}$ : 443.1465, found: 443.1469 (**4i**); 443.1465 (**4i'**). IR (neat)  $\text{cm}^{-1}$ : **4i** 2926, 2836, 1726, 1674, 1259, 1025, 792, 764, 701; **4i'** 2962, 2922, 1724, 1384, 1260, 1020, 798.

ethyl (4*R*,5*S*)-5-(5-formylfuran-2-yl)-4-(4-methoxyphenyl)-2-oxo-5-phenylpentanoate (**4j**)

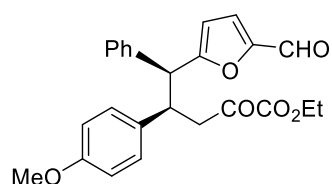

**4j**

The reaction was carried out following the general procedure to give two diastereoisomers with 69% yield and 81:19 dr as colorless oil. Enantiomeric excess of the major isomer **4j** was determined by UPC<sup>2</sup> using Chiralpak IG-3 column,  $\text{CO}_2/\text{MeOH}$  95:5, flow rate 2mL/min, 91%,  $t_{\text{major}} = 5.429$  min,  $t_{\text{minor}} = 5.958$  min; Enantiomeric excess of the minor isomer **4j'** was determined by UPC<sup>2</sup> using Chiralpak AD-3 column,  $\text{CO}_2/\text{MeOH}$  95:5, flow rate 2mL/min, 75%,  $t_{\text{minor}} = 2.550$  min,  $t_{\text{major}} = 3.337$  min.  $[\alpha]_{\text{D}}^{26} = -15.0$  (c 1.0, AcOEt, **4j**);  $[\alpha]_{\text{D}}^{26} = -200.0$  (c 0.1, AcOEt, **4j'**).  $^1\text{H}$  NMR (400 MHz,  $(\text{CD}_3)_2\text{SO}$ ) **4j**  $\delta$  9.34 (s, 1H), 7.52 (d,  $J = 7.2$  Hz, 2H), 7.37 (t,  $J = 7.6$  Hz, 2H), 7.30–7.23 (m, 4H), 6.75 (t,  $J = 5.8$  Hz, 2H), 6.50 (d,  $J = 3.6$  Hz, 1H), 4.56 (d,  $J = 11.8$  Hz, 1H), 4.05 (q,  $J = 7.1$  Hz, 2H), 3.96 (td,  $J = 11.1, 3.8$  Hz, 1H), 3.65 (s, 3H), 3.22 (dd,  $J = 17.0, 10.6$  Hz, 1H), 2.75 (dd,  $J = 17.0, 3.8$  Hz, 1H), 1.14 (t,  $J = 7.1$  Hz, 3H); **4j'**  $\delta$  9.51 (s, 1H), 7.47 (d,  $J = 3.5$  Hz, 1H), 7.24–7.18 (m, 2H), 7.16–7.02 (m, 5H), 6.73 (d,  $J = 3.5$  Hz, 1H), 6.65 (d,  $J = 8.7$  Hz, 2H), 4.60 (d,  $J = 11.3$  Hz, 1H), 4.11 (q,  $J = 7.1$  Hz, 2H), 4.05–3.92 (m, 1H), 3.61 (s, 3H), 3.35 (s, 1H), 3.37–3.25 (m, 1H), 3.01 (dd,  $J = 17.1, 4.2$  Hz, 1H), 1.18 (t,  $J = 7.1$  Hz, 3H).  $^{13}\text{C}$  NMR (100 MHz,  $(\text{CD}_3)_2\text{SO}$ ) **4j**  $\delta$  192.4, 177.4, 162.9, 160.0, 157.7, 151.0, 139.7, 133.4, 129.1, 128.9, 128.4, 127.4, 113.4, 110.0, 61.7, 54.8, 50.6, 43.6, 43.5, 13.7; **4j'**  $\delta$  192.0, 177.6, 162.8, 160.0, 157.5, 151.8, 139.3, 132.8, 129.3, 128.4, 128.1, 126.6, 113.2, 110.3, 61.7, 54.7, 50.1, 44.1, 43.5, 13.7. HRMS(ESI)  $m/z$  ( $\text{M}+\text{Na}$ ) $^+$ : calculated for  $\text{C}_{25}\text{H}_{24}\text{O}_6\text{Na}$ : 443.1465, found: 443.1470 (**4j**); 443.1465 (**4j'**). IR (neat)  $\text{cm}^{-1}$ : **4j** 2961, 2837, 1725, 1674, 1513, 1249, 1179, 1027, 798, 764, 702; **4j'** 2924, 1723, 1670, 1384, 1023, 798.

ethyl (4*R*,5*S*)-4-(2-chlorophenyl)-5-(5-formylfuran-2-yl)-2-oxo-5-phenylpentanoate (**4k**)

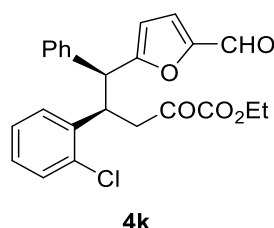

The reaction was carried out following the general procedure to give two diastereoisomers with 62% yield and 88:12 dr. The major isomer **4k** was isolated as a light yellow oil; The minor isomer **4k'** was isolated as a colorless oil. Enantiomeric excess was determined by UPC<sup>2</sup> using Chiralpak IG-3 column, CO<sub>2</sub>/MeOH 95:5, flow rate 2mL/min, **4k**: 83%,  $t_{\text{minor}} = 3.320$  min,  $t_{\text{major}} = 4.433$  min.; **4k'**: 88%,  $t_{\text{minor}} = 3.295$  min,  $t_{\text{major}} = 3.815$  min.  $[\alpha]_{\text{D}}^{27} = +7.0$  (c 1.0, AcOEt, **4k**);  $[\alpha]_{\text{D}}^{28} = -75.0$  (c 0.2, AcOEt, **4k'**). <sup>1</sup>H NMR (600 MHz, (CD<sub>3</sub>)<sub>2</sub>SO) **4k**  $\delta$  9.35 (s, 1H), 7.66 (d,  $J = 6.0$  Hz, 1H), 7.53 (d,  $J = 7.2$  Hz, 2H), 7.40 (t,  $J = 7.7$  Hz, 2H), 7.32–7.25 (m, 3H), 7.22 (d,  $J = 3.6$  Hz, 1H), 7.13 (td,  $J = 7.7, 1.5$  Hz, 1H), 6.35 (d,  $J = 2.7$  Hz, 1H), 4.70 (d,  $J = 10.5$  Hz, 1H), 4.52 (s, 1H), 4.07 (q,  $J = 7.1$  Hz, 2H), 3.14 (s, 1H), 3.02 (dd,  $J = 16.7, 4.1$  Hz, 1H), 1.16 (t,  $J = 7.1$  Hz, 3H); **4k'**  $\delta$  9.53 (s, 1H), 7.57 (d,  $J = 7.6$  Hz, 1H), 7.49 (d,  $J = 3.5$  Hz, 1H), 7.23 – 7.18 (m, 3H), 7.16 (dd,  $J = 8.0, 1.1$  Hz, 1H), 7.12 (t,  $J = 7.6$  Hz, 2H), 7.08–7.02 (m, 2H), 6.76 (d,  $J = 3.6$  Hz, 1H), 4.75 (d,  $J = 11.3$  Hz, 1H), 4.62–4.50 (m, 1H), 4.13 (q,  $J = 7.1$  Hz, 2H), 3.31–3.18 (m, 2H), 1.20 (t,  $J = 7.1$  Hz, 3H). <sup>13</sup>C NMR (150 MHz, (CD<sub>3</sub>)<sub>2</sub>SO) **4k**  $\delta$  191.3, 177.4, 162.0, 159.6, 151.3, 138.8, 133.3, 129.1, 128.9, 128.7, 128.6, 128.3, 127.6, 127.3, 109.5, 61.7, 59.7, 49.9, 43.3, 20.7, 13.7; **4k'**  $\delta$  191.1, 177.8, 161.9, 159.7, 152.0, 138.6, 138.5, 133.4, 129.0, 128.2, 128.1, 128.1, 128.0, 127.1, 126.8, 110.7, 61.7, 49.4, 43.7, 13.7. HRMS(ESI)  $m/z$  (M+Na)<sup>+</sup>: calculated for C<sub>24</sub>H<sub>21</sub>ClO<sub>5</sub>Na: 447.0970, found: 447.0975 (**4k**); 447.0970 (**4k'**). IR (neat) cm<sup>-1</sup>: **4k** 2962, 2925, 1725, 1674, 1384, 1260, 1076, 1022, 799, 756, 702; **4k'** 2962, 2923, 1724, 1672, 1384, 1260, 1086, 1020, 799.

ethyl (4*R*,5*S*)-4-(3-chlorophenyl)-5-(5-formylfuran-2-yl)-2-oxo-5-phenylpentanoate (**4l**)

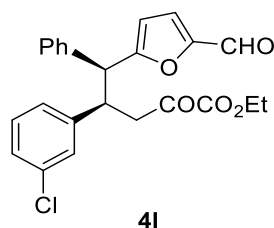

The reaction was carried out following the general procedure to give two diastereoisomers with 82% yield and 74:26 dr. The major isomer **4l** was isolated as a white solid (m.p. = 100 – 101 °C); The minor isomer **4l'** was isolated as a white solid (m.p. = 125 – 126 °C). Enantiomeric excess was determined by UPC<sup>2</sup> using Chiralpak IG-3 column, CO<sub>2</sub>/MeOH 95:5, flow rate 2mL/min, **4l**: 95%,  $t_{\text{minor}} = 2.951$  min,  $t_{\text{major}} = 3.167$  min; **4l'**: 87%,  $t_{\text{minor}} = 2.948$  min,  $t_{\text{major}} = 3.273$  min.  $[\alpha]_{\text{D}}^{26} = -16.0$  (c 1.0, AcOEt, **4l**);  $[\alpha]_{\text{D}}^{26} = -66.0$  (c 0.5, AcOEt, **4l'**). <sup>1</sup>H NMR (600 MHz, (CD<sub>3</sub>)<sub>2</sub>SO) **4l**  $\delta$  9.34 (s, 1H), 7.55 – 7.50 (m, 3H), 7.38 (t,  $J = 7.6$  Hz, 2H), 7.33 (d,  $J = 7.7$  Hz, 1H), 7.30 – 7.26 (m, 1H), 7.25 (d,  $J = 3.6$  Hz, 1H), 7.21 (t,  $J = 7.8$  Hz, 1H), 7.17–7.13 (m, 1H), 6.57 (d,  $J = 3.6$  Hz, 1H), 4.65 (d,  $J = 11.9$  Hz, 1H), 4.06 (q,  $J = 7.1$  Hz, 2H), 4.03–3.99 (m, 1H), 3.34–3.27 (m, 1H), 2.82 (dd,  $J = 17.7, 3.7$  Hz, 1H), 1.14 (t,  $J = 7.1$  Hz, 3H); **4l'**  $\delta$  9.51 (s, 1H), 7.50 (d,  $J = 3.5$  Hz, 1H), 7.33 (s, 1H), 7.23 (d,  $J = 7.2$  Hz, 2H), 7.19–7.09 (m, 4H), 7.08–7.02 (m, 2H), 6.76 (d,  $J = 3.6$  Hz, 1H), 4.69 (d,  $J = 11.5$  Hz, 1H), 4.11 (q,  $J = 7.1$  Hz, 2H),

4.03 (td,  $J = 11.2, 10.6, 4.0$  Hz, 1H), 3.41 (dd,  $J = 17.9, 10.0$  Hz, 1H), 3.09 (dd,  $J = 17.9, 4.0$  Hz, 1H), 1.19 (t,  $J = 7.1$  Hz, 3H).  $^{13}\text{C}$  NMR (150 MHz,  $(\text{CD}_3)_2\text{SO}$ ) **4l**  $\delta$  192.5, 177.9, 163.0, 160.3, 151.6, 145.0, 139.8, 133.2, 130.3, 129.4, 128.9, 128.5, 128.0, 127.6, 127.1, 110.6, 62.2, 50.5, 44.4, 43.6, 14.1; **4l'**  $\delta$  191.7, 177.7, 162.4, 159.9, 151.8, 143.8, 138.9, 132.5, 129.6, 128.4, 128.3, 127.3, 126.7, 126.3, 110.4, 61.8, 49.6, 43.8, 43.7, 13.7. HRMS(ESI)  $m/z$  ( $\text{M}+\text{Na}$ ) $^+$ : calculated for  $\text{C}_{24}\text{H}_{21}\text{ClO}_5\text{Na}$ : 447.0970, found: 447.0976 (**4l**); 447.0972 (**4l'**). IR (neat)  $\text{cm}^{-1}$ : **4l** 2962, 2924, 1723, 1670, 1384, 1071, 1020, 796, 696; **4l'** 2962, 2924, 1723, 1671, 1384, 1260, 1091, 1019, 799.

ethyl (4*R*,5*S*)-4-(4-chlorophenyl)-5-(5-formylfuran-2-yl)-2-oxo-5-phenylpentanoate (**4m**)

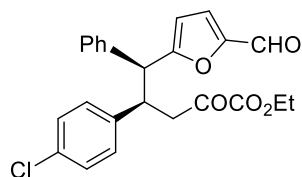

**4m**

The reaction was carried out following the general procedure to give two diastereoisomers with 85% yield and 79:21 dr. The major isomer **4m** was isolated as a yellow oil; The minor isomer **4m'** was isolated as a white solid (m.p. = 122 - 123 °C). Enantiomeric excess was determined by UPC<sup>2</sup> using Chiralpak IG-3 column,  $\text{CO}_2/\text{MeOH}$  95:5, flow rate 2mL/min, **4m**: 93%,  $t_{\text{minor}} = 4.313$  min,  $t_{\text{major}} = 4.848$  min; **4m'**: 84%,  $t_{\text{minor}} = 4.053$  min,  $t_{\text{major}} = 4.450$  min.  $[\alpha]_{\text{D}}^{26} = -22.0$  (c 1.0, AcOEt, **4m**);  $[\alpha]_{\text{D}}^{26} = -74.0$  (c 0.5, AcOEt, **4m'**).  $^1\text{H}$  NMR (400 MHz,  $(\text{CD}_3)_2\text{SO}$ ) **4m**  $\delta$  9.34 (s, 1H), 7.53 (d,  $J = 7.2$  Hz, 2H), 7.43–7.34 (m, 4H), 7.31–7.22 (m, 4H), 6.53 (d,  $J = 3.6$  Hz, 1H), 4.61 (d,  $J = 11.9$  Hz, 1H), 4.13–4.04 (m, 2H), 4.04–3.94 (m, 1H), 3.29 (dd,  $J = 17.6, 10.6$  Hz, 1H), 2.81 (dd,  $J = 17.6, 3.7$  Hz, 1H), 1.14 (t,  $J = 7.1$  Hz, 3H); **4m'**  $\delta$  9.51 (s, 1H), 7.48 (d,  $J = 3.6$  Hz, 1H), 7.25–7.18 (m, 4H), 7.17–7.11 (m, 4H), 7.07 - 7.01 (m, 1H), 6.76 (d,  $J = 3.6$  Hz, 1H), 4.65 (d,  $J = 11.5$  Hz, 1H), 4.11 (q,  $J = 7.1$  Hz, 2H), 4.07–3.99 (m, 1H), 3.46–3.36 (m, 1H), 3.08 (dd,  $J = 17.7, 4.0$  Hz, 1H), 1.18 (t,  $J = 7.1$  Hz, 3H).  $^{13}\text{C}$  NMR (100 MHz,  $(\text{CD}_3)_2\text{SO}$ ) **4m**  $\delta$  192.0, 177.4, 162.5, 159.9, 151.1, 140.9, 139.3, 131.1, 130.0, 128.9, 128.4, 128.0, 127.5, 110.1, 61.7, 50.2, 43.6, 43.2; **4m'**  $\delta$  191.7, 177.7, 162.4, 159.9, 151.8, 140.3, 139.0, 130.8, 130.3, 128.4, 128.3, 127.8, 126.7, 110.4, 61.8, 49.8, 43.8, 43.6, 13.7. HRMS(ESI)  $m/z$  ( $\text{M}+\text{Na}$ ) $^+$ : calculated for  $\text{C}_{24}\text{H}_{21}\text{ClO}_5\text{Na}$ : 447.0970, found: 447.0976 (**4m**); 447.0970 (**4m'**). IR (neat)  $\text{cm}^{-1}$ : **4m** 2962, 1725, 1674, 1491, 1260, 1072, 1014, 798, 763, 702; **4m'** 2962, 2924, 1724, 1671, 1384, 1260, 1091, 1014, 799.

ethyl (4*R*,5*S*)-4-(benzo[*d*][1,3]dioxol-5-yl)-5-(5-formylfuran-2-yl)-2-oxo-5-phenylpentanoate (**4n**)

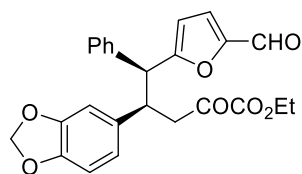

**4n**

The reaction was carried out following the general procedure to give two diastereoisomers with 56% yield and 67:33 dr. The major isomer **4n** was isolated as a light yellow solid (m.p. =

150 – 151 °C); The minor isomer **4n'** was isolated as a colorless oil. Enantiomeric excess of **4n** was determined by UPC<sup>2</sup> using Chiralpak IG-3 column, CO<sub>2</sub>/MeOH 95:5, flow rate 2mL/min, 99%,  $t_{\text{major}} = 5.152$  min,  $t_{\text{minor}} = 5.704$  min; Enantiomeric excess of **4n'** was determined by UPC<sup>2</sup> using Chiralpak AD-3 column, CO<sub>2</sub>/MeOH 95:5, flow rate 2mL/min, 69%,  $t_{\text{minor}} = 2.848$  min,  $t_{\text{major}} = 3.227$  min.  $[\alpha]_{\text{D}}^{27} = -19.0$  (c 1.0, AcOEt, **4n**);  $[\alpha]_{\text{D}}^{27} = -85.0$  (c 0.2, AcOEt, **4n'**). <sup>1</sup>H NMR (400 MHz, CDCl<sub>3</sub>) **4n** δ 9.44 (s, 1H), 7.46–7.41 (m, 2H), 7.39 – 7.32 (m, 2H), 7.30–7.26 (m, 1H), 6.96 (d,  $J = 3.6$  Hz, 1H), 6.71 (d,  $J = 1.6$  Hz, 1H), 6.67 (dd,  $J = 8.0, 1.7$  Hz, 1H), 6.61 (d,  $J = 8.0$  Hz, 1H), 6.13 (d,  $J = 3.6$  Hz, 1H), 5.87 (s, 2H), 4.23 (d,  $J = 11.6$  Hz, 1H), 4.20–4.13 (m, 2H), 4.12–4.04 (m, 1H), 3.19 (dd,  $J = 17.4, 10.1$  Hz, 1H), 2.87 (dd,  $J = 17.4, 4.0$  Hz, 1H), 1.26 (t,  $J = 7.1$  Hz, 3H); <sup>1</sup>H NMR (600 MHz, CDCl<sub>3</sub>) **4n'** δ 9.57 (s, 1H), 7.20–7.14 (m, 5H), 7.15 (s, 1H), 7.14–7.09 (m, 1H), 6.53 (d,  $J = 8.1$  Hz, 2H), 6.48 (dd,  $J = 8.0, 1.6$  Hz, 1H), 6.41 (d,  $J = 3.6$  Hz, 1H), 5.83 (dd,  $J = 6.5, 1.4$  Hz, 2H), 4.26 (d,  $J = 10.8$  Hz, 1H), 4.24–4.18 (m, 2H), 4.08–4.01 (m, 1H), 3.32 (dd,  $J = 17.5, 9.3$  Hz, 1H), 3.09 (dd,  $J = 17.5, 4.7$  Hz, 1H), 1.29 (t,  $J = 7.1$  Hz, 3H). <sup>13</sup>C NMR (100 MHz, CDCl<sub>3</sub>) **4n** δ 192.1, 177.0, 162.1, 160.3, 151.8, 147.7, 146.4, 138.5, 134.7, 129.1, 128.5, 127.8, 121.3, 110.0, 108.2, 107.9, 100.9, 62.4, 52.2, 44.6, 43.9, 13.8; <sup>13</sup>C NMR (150 MHz, CDCl<sub>3</sub>) **4n'** δ 192.0, 177.2, 162.4, 160.4, 152.2, 147.5, 146.2, 138.3, 134.1, 128.4, 127.1, 121.6, 110.4, 108.2, 108.0, 100.8, 62.5, 51.8, 44.8, 44.2, 13.9. HRMS(ESI)  $m/z$  (M+Na)<sup>+</sup>: calculated for C<sub>25</sub>H<sub>22</sub>O<sub>7</sub>Na: 457.1258, found: 457.1261 (**4n**); 457.1258 (**4n'**). IR (neat) cm<sup>-1</sup>: **4n** 2962, 2920, 1725, 1674, 1488, 1247, 1036, 933, 801, 763, 702; **4n'** 2922, 1725, 1675, 1489, 1384, 1244, 1033, 931, 802.

ethyl (4*R*,5*S*)-5-(5-formylfuran-2-yl)-4-(naphthalen-2-yl)-2-oxo-5-phenylpentanoate (**4o**)

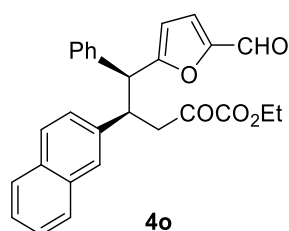

The reaction was carried out following the general procedure to give two diastereoisomers with 71% yield and 82:18 dr. The major isomer **4o** was isolated as a light yellow solid (m.p. = 108 – 109 °C); The minor isomer **4o'** was isolated as a white solid (m.p. = 143 – 144 °C). Enantiomeric excess was determined by UPC<sup>2</sup> using Chiralpak AD-3 column, CO<sub>2</sub>/MeOH 95:5, flow rate 2mL/min, **4o**: 96%,  $t_{\text{minor}} = 4.121$  min,  $t_{\text{major}} = 5.056$  min.; **4o'**: 74%,  $t_{\text{minor}} = 4.075$  min,  $t_{\text{major}} = 5.351$  min.  $[\alpha]_{\text{D}}^{26} = -32.0$  (c 1.0, AcOEt, **4o**);  $[\alpha]_{\text{D}}^{26} = -80.0$  (c 0.2, AcOEt, **4o'**). <sup>1</sup>H NMR (400 MHz, CDCl<sub>3</sub>) **4o** δ 9.37 (s, 1H), 7.76–7.67 (m, 4H), 7.54–7.47 (m, 2H), 7.44–7.36 (m, 5H), 7.32 – 7.27 (m, 1H), 6.83 (d,  $J = 3.6$  Hz, 1H), 6.09 (d,  $J = 3.6$  Hz, 1H), 4.46 (d,  $J = 11.6$  Hz, 1H), 4.40–4.28 (m, 1H), 4.14–4.03 (m, 2H), 3.38 (dd,  $J = 17.5, 9.8$  Hz, 1H), 3.00 (dd,  $J = 17.5, 4.0$  Hz, 1H), 1.16 (t,  $J = 7.1$  Hz, 3H); **4o'** δ 9.60 (s, 1H), 7.72–7.61 (m, 3H), 7.50 (s, 1H), 7.43–7.35 (m, 2H), 7.25–7.15 (m, 4H), 7.14 – 7.07 (m, 2H), 7.06–6.99 (m, 1H), 6.44 (d,  $J = 3.6$  Hz, 1H), 4.49 (d,  $J = 10.7$  Hz, 1H), 4.40–4.28 (m, 1H), 4.20–4.09 (m, 2H), 3.58–3.44 (m, 1H), 3.23 (dd,  $J = 17.6, 4.8$  Hz, 1H), 1.20 (t,  $J = 7.1$  Hz, 3H). <sup>13</sup>C NMR (100 MHz, CDCl<sub>3</sub>) **4o** δ 192.1, 176.9, 162.0, 160.3, 151.8, 138.5, 138.4, 133.2, 132.4, 129.2, 128.5, 128.3, 127.9, 127.7, 127.5, 127.0, 126.1, 125.8, 125.6, 110.0, 62.4, 51.9, 45.0, 43.8, 13.7; **4o'** δ 192.0, 177.2, 162.4, 160.4, 152.3, 138.2, 137.9, 133.1, 132.3, 128.5, 128.4, 128.1, 127.7, 127.4, 127.1, 125.9, 125.8, 125.7, 110.5, 62.5, 51.5, 45.2, 44.1, 13.7. HRMS(ESI)  $m/z$  (M+Na)<sup>+</sup>: calculated for



C<sub>28</sub>H<sub>24</sub>O<sub>5</sub>Na: 463.1516, found: 463.1521 (**4o**); 463.1516 (**4o'**). IR (neat) cm<sup>-1</sup>: **4o** 3057, 2961, 1725, 1673, 1510, 1259, 1072, 798, 748, 701; **4o'** 2962, 2921, 1725, 1673, 1510, 1260, 1072, 1024, 802, 749, 702.

ethyl (4*R*,5*S*)-5-(5-formylfuran-2-yl)-4-(furan-2-yl)-2-oxo-5-phenylpentanoate (**4p**)

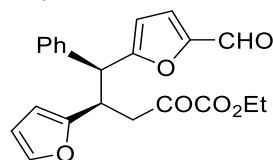

**4p**

The reaction was carried out following the general procedure to give two diastereoisomers with 68% yield and 74:26 dr. The major isomer **4p** was isolated as a light yellow oil; The minor isomer **4p'** was isolated as a light yellow solid (m.p. = 81 - 82 °C). Enantiomeric excess was determined by UPC<sup>2</sup> using Chiralpak IG-3 column, CO<sub>2</sub>/MeOH 95:5, flow rate 2mL/min, **4p**: 93%, *t*<sub>major</sub> = 2.821 min, *t*<sub>minor</sub> = 3.060 min; **4p'**: 88%, *t*<sub>minor</sub> = 2.430 min, *t*<sub>major</sub> = 2.690 min. [ $\alpha$ ]<sub>D</sub><sup>25</sup> = -6.0 (c 1.0, AcOEt, **4p**); [ $\alpha$ ]<sub>D</sub><sup>25</sup> = -48.0 (c 0.5, AcOEt, **4p'**). <sup>1</sup>H NMR (600 MHz, (CD<sub>3</sub>)<sub>2</sub>SO) **4p**  $\delta$  9.41 (s, 1H), 7.43 (d, *J* = 7.8 Hz, 3H), 7.38–7.33 (m, 3H), 7.28 (t, *J* = 7.3 Hz, 1H), 6.56 (d, *J* = 3.6 Hz, 1H), 6.23 (dd, *J* = 3.1, 1.8 Hz, 1H), 6.07 (d, *J* = 3.1 Hz, 1H), 4.54 (d, *J* = 11.1 Hz, 1H), 4.18–4.13 (m, 1H), 4.11 (q, *J* = 7.1 Hz, 2H), 3.19 (dd, *J* = 17.3, 10.1 Hz, 1H), 2.84 (dd, *J* = 17.3, 4.0 Hz, 1H), 1.18 (t, *J* = 7.1 Hz, 3H); **4p'**  $\delta$  9.51 (s, 1H), 7.47 (d, *J* = 3.6 Hz, 1H), 7.36 (d, *J* = 1.1 Hz, 1H), 7.24–7.19 (m, 2H), 7.19 - 7.14 (m, 3H), 6.68 (d, *J* = 3.6 Hz, 1H), 6.14 (dd, *J* = 3.1, 1.8 Hz, 1H), 5.90 (d, *J* = 3.1 Hz, 1H), 4.55 (d, *J* = 9.9 Hz, 1H), 4.19 - 4.12 (m, 3H), 3.29 (dd, *J* = 17.6, 9.6 Hz, 2H), 3.06 (dd, *J* = 17.6, 4.3 Hz, 1H), 1.22 (t, *J* = 7.1 Hz, 3H). <sup>13</sup>C NMR (150 MHz, (CD<sub>3</sub>)<sub>2</sub>SO) **4p**  $\delta$  191.5, 177.5, 162.2, 159.7, 154.1, 151.4, 141.8, 138.6, 128.9, 128.4, 127.5, 110.2, 109.8, 106.8, 61.8, 48.8, 41.0, 37.8, 13.70; **4p'**  $\delta$  191.8, 178.2, 162.2, 160.2, 153.9, 152.3, 142.0, 139.0, 128.7, 127.5, 111.1, 110.5, 107.6, 62.2, 49.2, 41.6, 38.2, 14.1. HRMS(ESI) *m/z* (M+Na)<sup>+</sup>: calculated for C<sub>22</sub>H<sub>20</sub>O<sub>6</sub>Na: 403.1152, found: 403.1156 (**4p**); 403.1153(**4p'**). IR (neat) cm<sup>-1</sup>: **4p** 2962, 2925, 1727, 1674, 1384, 1260, 1091, 1019, 799; **4p'** 2962, 2924, 1727, 1676, 1384, 1261, 1095, 1021, 799.

ethyl (4*R*,5*S*)-5-(5-formylfuran-2-yl)-2-oxo-5-phenyl-4-(thiophen-2-yl)pentanoate (**4q**)

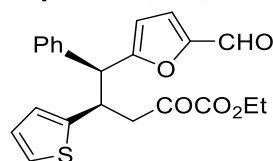

**4q**

The reaction was carried out following the general procedure to give two diastereoisomers with 61% yield and 73:27 dr. The major isomer **4q** was isolated as a light yellow solid (m.p. = 97 - 98 °C); The minor isomer **4q'** was isolated as a yellow solid (m.p. = 95 - 96 °C). Enantiomeric excess was determined by UPC<sup>2</sup> using Chiralpak IG-3 column, CO<sub>2</sub>/MeOH 90:10, flow rate 2mL/min, **4q**: 83%, *t*<sub>minor</sub> = 1.924 min, *t*<sub>major</sub> = 2.152 min; **4q'**: 88%, *t*<sub>minor</sub> = 1.778 min, *t*<sub>major</sub> = 1.993 min. [ $\alpha$ ]<sub>D</sub><sup>26</sup> = -9.0 (c 1.0, AcOEt, **4q**); [ $\alpha$ ]<sub>D</sub><sup>26</sup> = -85.0 (c 1.0, AcOEt, **4q'**). <sup>1</sup>H NMR (600 MHz, (CD<sub>3</sub>)<sub>2</sub>SO) **4q**  $\delta$  9.40 (s, 1H), 7.50 (d, *J* = 7.2 Hz, 2H), 7.37 (t, *J* = 7.7 Hz, 2H), 7.31 - 7.26 (m, 2H), 7.24 (dd, *J* = 5.0, 0.9 Hz, 1H), 6.94 (dd, *J* = 3.4, 0.8 Hz, 1H), 6.83 (dd, *J* = 5.0, 3.5 Hz, 1H), 6.55 (d, *J* = 3.6 Hz, 1H), 4.54 (d, *J* = 11.5 Hz, 1H), 4.35 (td, *J* = 10.8, 3.8

Hz, 1H), 4.09 (q,  $J = 7.1$  Hz, 2H), 3.27 (dd,  $J = 17.5, 10.3$  Hz, 1H), 2.87 (dd,  $J = 17.5, 3.8$  Hz, 1H), 1.17 (t,  $J = 7.1$  Hz, 3H); **4q'**  $\delta$  9.52 (s, 1H), 7.47 (d,  $J = 2.4$  Hz, 1H), 7.23 (d,  $J = 7.7$  Hz, 2H), 7.18 (dd,  $J = 14.6, 6.2$  Hz, 3H), 7.12 (t,  $J = 7.1$  Hz, 1H), 6.80–6.73 (m, 2H), 6.71 (d,  $J = 2.3$  Hz, 1H), 4.56 (d,  $J = 10.5$  Hz, 1H), 4.35 (td,  $J = 9.9, 3.7$  Hz, 1H), 4.14 (q,  $J = 7.0$  Hz, 2H), 3.41–3.35 (m, 1H), 3.11 (dd,  $J = 17.6, 3.2$  Hz, 1H), 1.23–1.18 (m, 3H).  **$^{13}\text{C}$  NMR** (150 MHz,  $(\text{CD}_3)_2\text{SO}$ ) **4q**  $\delta$  192.1, 177.9, 162.7, 160.2, 151.6, 145.1, 139.5, 129.4, 128.8, 127.9, 127.0, 125.8, 124.7, 110.6, 62.2, 52.0, 44.5, 14.1; **4q'**  $\delta$  191.7, 178.2, 162.3, 160.3, 152.2, 144.4, 139.1, 128.9, 128.7, 127.4, 126.8, 126.0, 124.7, 111.2, 62.2, 51.4, 44.8, 14.1. **HRMS(ESI)**  $m/z$  ( $\text{M}+\text{Na}^+$ ): calculated for  $\text{C}_{22}\text{H}_{20}\text{O}_5\text{SNa}$ : 419.0924, found: 419.0928 (**4q**); 419.0925 (**4q'**). **IR** (neat)  $\text{cm}^{-1}$ : **4q** 2962, 2924, 1725, 1673, 1259, 1068, 1022, 799, 764, 701; **4q'** 2962, 2925, 1724, 1673, 1509, 1384, 1260, 1068, 1020, 798, 696.

#### 4. Gram-scale reaction of **3a**

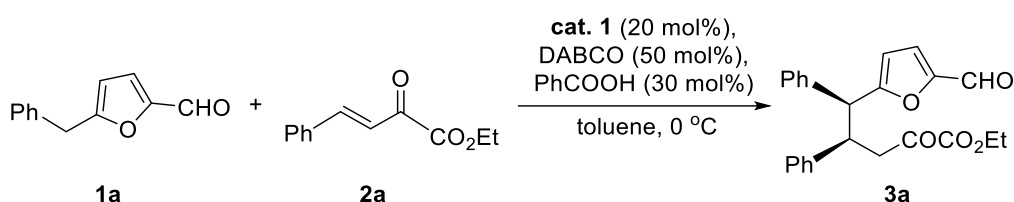

To a solution of 5-benzylfurfurals **1a** (1.4 g, 7.5 mmol, 1.5 equiv), **cat. 1** (1 mmol, 0.2 equiv), DABCO (2.5 mmol, 0.5 equiv) and PhCOOH (1.5 mmol, 0.3 equiv) in toluene (60 mL) at 0 °C,  $\beta,\gamma$ -unsaturated  $\alpha$ -ketoesters **2a** (1.0 g, 5 mmol, 1.0 equiv) was added and the reaction mixture was stirred at the same temperature until **2a** disappeared by TLC detection. The solution was quenched with  $\text{H}_2\text{O}$  (20 mL), extracted by AcOEt (20 mL  $\times$ 3). The combined organic layer was washed with brine, dried over anhydrous  $\text{Na}_2\text{SO}_4$ , and evaporated under reduced pressure. The residue was purified by flash chromatography on silica gel (petroleum ether:EtOAc = 15:1 or 3:1) to afford compound **3a** (1.4g, 74% yield, 81:19 dr, 97/87% ee).

#### 5. Plausible reaction mechanism

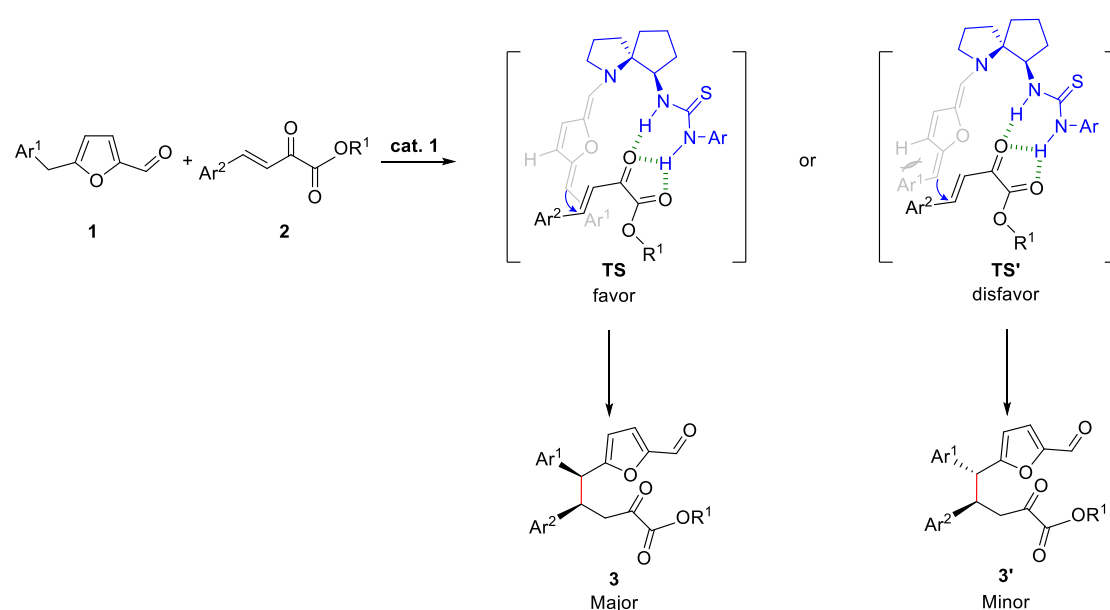

A trienamine intermediate would be formed by reaction of the secondary amine of the catalyst with the furfural. **3** was obtained by intermediate **TS**, and **3'** was obtained by intermediate **TS'**. Due to the steric hindrance of **TS'**, **3** was easier to obtain as the major product than **3'**. In addition, PhCOOH was required to activate the carbonyl group for the attack by an amine catalyst, and DABCO might act as a base to help remove the benzylic proton of the resulting iminium ion intermediate, which could generate the active dearomative trienamine species.

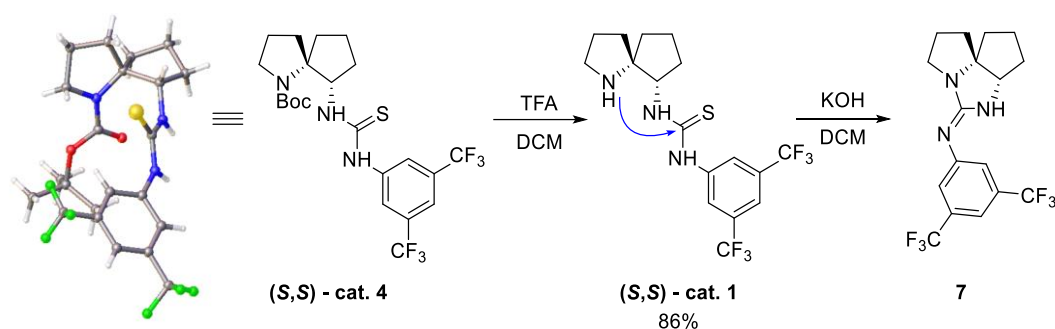

The structure of the novel SPD-bifunctional thiourea **cat. 1** was then determined by X-ray analysis of the single crystal of **cat. 4**. Interestingly, after deprotection of the Boc group, an intramolecular condensation could take place in DCM in the presence of a strong base to produce guanidine **7** with the loss of H<sub>2</sub>S, which also demonstrates the proximity of the secondary amine moiety with the thiourea that might exert additional benefit for a highly enantioselective reaction process.

## 6. Product derivatization

### 6.1 product derivatization

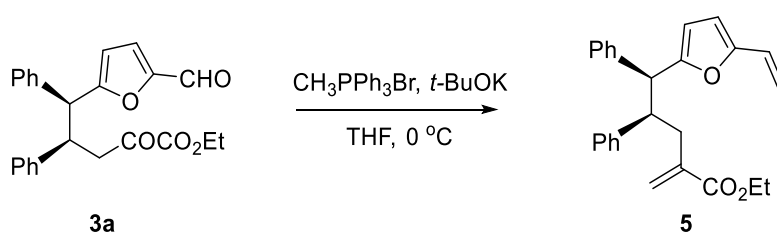

To a solution of CH<sub>3</sub>PPh<sub>3</sub>Br (201.5 mg, 2.2 equiv) in THF (5 mL) was added *t*-BuOK (63.0 mg, 2.2 equiv) at 0 °C, and the reaction mixture was stirred for 30 minutes at the room temperature. Then the reaction mixture was cooled to 0 °C, the reaction mixture was added drop by drop to a solution of **3a** (100.0 mg, 1.0 equiv) in THF (5 mL), and **3a** disappeared via TLC detection after 5 minutes. The solution was quenched with icy H<sub>2</sub>O (10 mL), extracted by AcOEt (15 mL × 3). The combined organic layer was washed with brine (20 mL), dried over anhydrous Na<sub>2</sub>SO<sub>4</sub>, and evaporated under reduced pressure. The residue was purified by flash chromatography on silica gel (petroleum ether:EtOAc = 20:1) to afford compound **5** as a colorless oil (79.5 mg, 80% yield, 95% ee).

2-((1*S*,2*R*)-4-ethoxy-1,2-diphenylpent-4-en-1-yl)-5-vinylfuran (**5**)

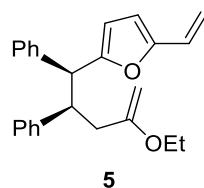

Enantiomeric excess of **5** was determined by UPC<sup>2</sup> using Trefoil<sup>TM</sup> CEL2 column, CO<sub>2</sub>/MeOH 98:2, flow rate 2mL/min, 95%,  $t_{\text{major}} = 2.051$  min,  $t_{\text{minor}} = 2.446$  min.  $[\alpha]_{\text{D}}^{20} = +28.0$  (c 1.0, AcOEt). <sup>1</sup>H NMR (400 MHz, CDCl<sub>3</sub>)  $\delta$  7.47–7.42 (m, 2H), 7.38 – 7.31 (m, 2H), 7.18 (t,  $J = 7.3$  Hz, 2H), 7.12–7.05 (m, 3H), 6.30 (dd,  $J = 17.5, 11.2$  Hz, 1H), 5.88 (dd,  $J = 11.3, 2.2$  Hz, 2H), 5.76 (d,  $J = 3.2$  Hz, 1H), 5.46 (dd,  $J = 17.5, 1.3$  Hz, 1H), 5.09 (s, 1H), 5.00 (dd,  $J = 11.2, 1.4$  Hz, 1H), 4.17–4.05 (m, 3H), 3.70 (td,  $J = 11.2, 3.8$  Hz, 1H), 2.63 (dd,  $J = 13.9, 3.3$  Hz, 1H), 2.39 (dd,  $J = 13.9, 11.6$  Hz, 1H), 1.23 (t,  $J = 7.1$  Hz, 3H). <sup>13</sup>C NMR (100 MHz, CDCl<sub>3</sub>)  $\delta$  166.9, 155.6, 151.6, 142.0, 140.7, 138.3, 128.6, 128.5, 128.3, 127.9, 126.8, 126.8, 126.2, 125.0, 110.7, 108.6, 108.0, 60.4, 52.4, 49.0, 36.9, 14.1. HRMS(ESI)  $m/z$  (M+Na)<sup>+</sup>: calculated for C<sub>26</sub>H<sub>26</sub>O<sub>3</sub>Na: 409.1774, found: 409.1780; IR (neat) cm<sup>-1</sup>: 3028, 2926, 1712, 1384, 1187, 1024, 700.

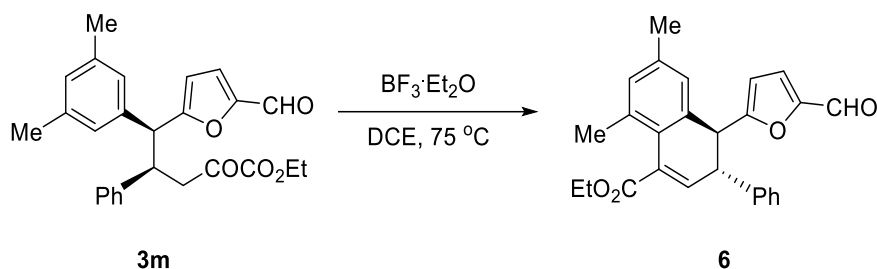

To a solution of **3m** (37.4 mg, 1.0 equiv) in DCE (2 mL) was added BF<sub>3</sub>·Et<sub>2</sub>O (22  $\mu$ L, 2.0 equiv) at 0 °C, then the reaction mixture was stirred at 75 °C until the substrate disappeared via TLC detection. The solution was cooled to room temperature and quenched with H<sub>2</sub>O (5 mL), extracted by DCM (10 mL  $\times$ 3). The combined organic layer was washed with brine (10 mL), dried over anhydrous Na<sub>2</sub>SO<sub>4</sub>, and evaporated under reduced pressure. The residue was purified by flash chromatography on silica gel (petroleum ether:EtOAc = 10:1) to afford compound **6** as a colorless oil (28 mg, 79% yield, 90% ee).

ethyl(3*R*,4*S*)-4-(5-formylfuran-2-yl)-6,8-dimethyl-3-phenyl-3,4-dihydronaphthalene-1-carboxylate (**6**)

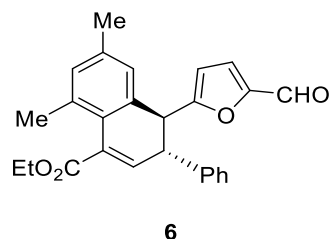

Enantiomeric excess of **6** was determined by UPC<sup>2</sup> using Chiralpak IG-3 column, CO<sub>2</sub>/MeOH 90:10, flow rate 2mL/min, 90%,  $t_{\text{major}} = 1.642$  min,  $t_{\text{minor}} = 2.364$  min.  $[\alpha]_{\text{D}}^{20} = -160.0$  (c 1.0, AcOEt). <sup>1</sup>H NMR (400 MHz, CDCl<sub>3</sub>)  $\delta$  9.54 (s, 1H), 7.24–7.16 (m, 3H), 7.15–7.10 (m, 2H), 7.08 (d,  $J = 3.6$  Hz, 1H), 6.96 (s, 1H), 6.74 (d,  $J = 5.5$  Hz, 1H), 6.54 (s, 1H), 6.06 (d,  $J = 3.5$  Hz, 1H), 4.34 – 4.27 (m, 3H), 4.17 (t,  $J = 6.0$  Hz, 1H), 2.28 (s, 3H), 2.21 (s, 3H),

1.34 (t,  $J = 7.1$  Hz, 3H).  $^{13}\text{C}$  NMR (100 MHz,  $\text{CDCl}_3$ )  $\delta\delta$  177.2, 168.5, 162.7, 152.1, 139.5, 138.3, 136.8, 134.6, 134.5, 134.22, 131.7, 128.5, 127.8, 127.6, 127.1, 126.7, 111.4, 61.1, 47.5, 44.3, 21.1, 21.0, 14.1.  $^{13}\text{C}$  DEPT $^{135}$  NMR (100 MHz,  $\text{CDCl}_3$ )  $\delta$  177.2, 136.8, 131.7, 128.5, 127.8, 127.1, 126.7, 111.4, 61.1, 47.5, 44.3, 21.1, 21.0, 14.1. HRMS(ESI)  $m/z$  ( $\text{M}+\text{H}$ ) $^+$ : calculated for  $\text{C}_{26}\text{H}_{25}\text{O}_4$ : 401.1747, found: 401.1737; IR (neat)  $\text{cm}^{-1}$ : 2980, 1720, 1679, 1510, 1240, 1193, 1049, 804, 700.

## 6.2 Reaction expansion

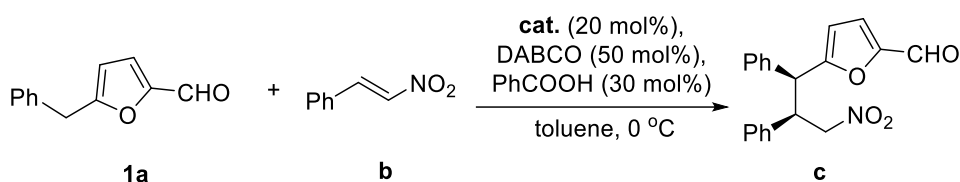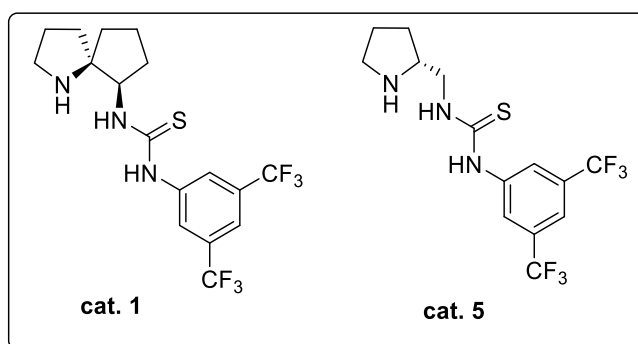

| entry | solvent | cat.   | additive         | temp (°C) | yield (%) | dr    | ee(%)                  |
|-------|---------|--------|------------------|-----------|-----------|-------|------------------------|
| 1     | toluene | cat. 1 | DABCO/<br>PhCOOH | 0         | 98        | 53:47 | major: 96<br>minor: 74 |
| 2     | toluene | cat. 5 | DABCO/<br>PhCOOH | 0         | 96        | 78:22 | major: 96<br>minor: 73 |

To a solution of 5-benzylfurfural **1a** (0.225 mmol, 1.5 equiv), **cat.** (0.03 mmol, 0.2 equiv), DABCO (0.075 mmol, 0.5 equiv) and PhCOOH (0.045 mmol, 0.3 equiv) in toluene (1.8 mL) at 0 °C, nitroalkene **b** (0.15 mmol, 1.0 equiv) was added, and the reaction mixture was stirred at the same temperature until **b** disappeared by TLC detection. The solution was then quenched with  $\text{H}_2\text{O}$  (2 mL), extracted by AcOEt (10 mL $\times$ 3). The combined organic layer was washed with brine (10 mL), dried over anhydrous  $\text{Na}_2\text{SO}_4$ , and evaporated under reduced pressure. The residue was purified by flash chromatography on silica gel (petroleum ether:EtOAc = 10:1 to 3:1) to afford compound **c**.

Asymmetric conjugate addition of 5-benzylfurfurals with nitroalkene has been investigated by using **cat.1** and **cat.5**. Under our optimal conditions, the reaction catalysed by **cat. 1** can produce **c** in 98% yield with lower diastereoselectivities (dr = 53:47) and similar enantioselectivities (96%/74%).

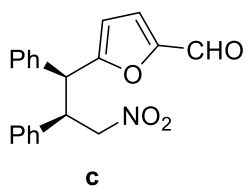

The reaction was carried out following the general procedure to give two diastereoisomers with 98% yield and 53:47 dr. Enantiomeric excess of major isomer **c** was determined by UPC<sup>2</sup> using Chiralpak AD-3 column, CO<sub>2</sub>/MeOH 95:5, flow rate 2mL/min, 96%,  $t_{\text{minor}} = 2.799$  min,  $t_{\text{major}} = 3.236$  min; Enantiomeric excess of minor isomer **c'** was determined by UPC<sup>2</sup> using Chiralpak IG-3 column, CO<sub>2</sub>/MeOH 95:5, flow rate 2mL/min, 74%,  $t_{\text{minor}} = 3.777$  min,  $t_{\text{major}} = 4.136$  min. <sup>1</sup>H NMR (400 MHz, CDCl<sub>3</sub>) **c**  $\delta$  9.62 (s, 1H), 7.23–7.10 (m, 9H), 7.02 (d,  $J = 7.0$  Hz, 2H), 6.45 (d,  $J = 3.6$  Hz, 1H), 4.78 (dd,  $J = 12.9, 9.5$  Hz, 1H), 4.63 (dd,  $J = 12.9, 4.7$  Hz, 1H), 4.48 – 4.30 (m, 2H); **c'**  $\delta$  9.44 (s, 1H), 7.49 (d,  $J = 7.3$  Hz, 2H), 7.41 (t,  $J = 7.4$  Hz, 2H), 7.34 (t,  $J = 7.3$  Hz, 1H), 7.29–7.15 (m, 5H), 6.93 (d,  $J = 3.6$  Hz, 1H), 6.11 (d,  $J = 3.6$  Hz, 1H), 4.67–4.49 (m, 1H), 4.46–4.26 (m, 3H). <sup>13</sup>C NMR (100 MHz, CDCl<sub>3</sub>) **c**  $\delta$  177.2, 160.8, 152.5, 137.1, 136.5, 128.7, 128.4, 127.9, 127.9, 127.6, 110.9, 78.6, 49.2, 48.3; **c'**  $\delta$  177.0, 160.7, 152.0, 137.3, 137.1, 129.5, 128.9, 128.4, 128.1, 128.1, 127.6, 110.2, 78.9, 49.7, 48.0.

## 7. Single crystal X-ray diffraction data for 4b, cat. 4, and 7

### 7.1 X-Ray of 4b

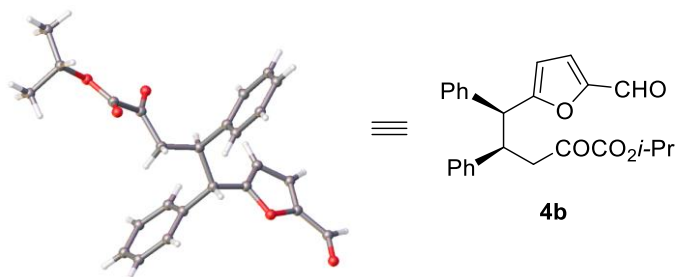

**Table S1. Crystal data and structure refinement for 4b (CCDC 2048401)**

|                     |                                                |
|---------------------|------------------------------------------------|
| identification code | 4b                                             |
| Empirical formula   | C <sub>25</sub> H <sub>24</sub> O <sub>5</sub> |
| Formula weight      | 404.44                                         |
| Temperature/K       | 293(2)                                         |
| Crystal system      | orthorhombic                                   |
| Space group         | P212121                                        |
| a/Å                 | 6.1221(4)                                      |
| b/Å                 | 16.6749(15)                                    |
| c/Å                 | 21.0774(18)                                    |
| $\alpha$ /°         | 90                                             |
| $\beta$ /°          | 90                                             |
| $\gamma$ /°         | 90                                             |

|                                             |                                                               |
|---------------------------------------------|---------------------------------------------------------------|
| Volume/Å <sup>3</sup>                       | 2151.7(3)                                                     |
| Z                                           | 4                                                             |
| ρ <sub>calc</sub> /cm <sup>3</sup>          | 1.248                                                         |
| μ/mm <sup>-1</sup>                          | 0.703                                                         |
| F(000)                                      | 856.0                                                         |
| Crystal size/mm <sup>3</sup>                | 0.15 × 0.06 × 0.04                                            |
| Radiation                                   | Cu Kα (λ = 1.54184)                                           |
| 2θ range for data collection/°              | 8.39 to 133.196                                               |
| Index ranges                                | -5 ≤ h ≤ 7, -19 ≤ k ≤ 19, -25 ≤ l ≤ 24                        |
| Reflections collected                       | 11429                                                         |
| Independent reflections                     | 3799 [R <sub>int</sub> = 0.0296, R <sub>sigma</sub> = 0.0353] |
| Data/restraints/parameters                  | 3799/0/273                                                    |
| Goodness-of-fit on F <sup>2</sup>           | 1.024                                                         |
| Final R indexes [I >= 2σ (I)]               | R <sub>1</sub> = 0.0438, wR <sub>2</sub> = 0.1028             |
| Final R indexes [all data]                  | R <sub>1</sub> = 0.0577, wR <sub>2</sub> = 0.1157             |
| Largest diff. peak/hole / e Å <sup>-3</sup> | 0.13/-0.16                                                    |
| Flack parameter                             | 0.06(13)                                                      |

## 7.2 X-Ray of cat. 4

**Cat. 4** was determined by X-ray analysis of the single crystal of (*S,S*)-**cat.4** which was synthesized from (*S,S*)-**S3** material.

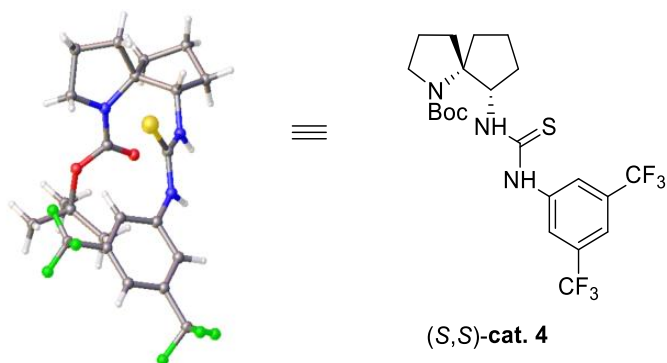

**Table S2. Crystal data and structure refinement for cat. 4 (CCDC 2048402)**

|                     |                                                                                |
|---------------------|--------------------------------------------------------------------------------|
| Identification code | xumh_0110                                                                      |
| Empirical formula   | C <sub>22</sub> H <sub>27</sub> F <sub>6</sub> N <sub>3</sub> O <sub>2</sub> S |
| Formula weight      | 511.52                                                                         |
| Temperature/K       | 293.58(10)                                                                     |
| Crystal system      | orthorhombic                                                                   |
| Space group         | P212121                                                                        |
| a/Å                 | 8.8909(2)                                                                      |

|                                             |                                         |
|---------------------------------------------|-----------------------------------------|
| b/Å                                         | 12.4974(3)                              |
| c/Å                                         | 22.9357(6)                              |
| $\alpha$ /°                                 | 90                                      |
| $\beta$ /°                                  | 90                                      |
| $\gamma$ /°                                 | 90                                      |
| Volume/Å <sup>3</sup>                       | 2548.46(11)                             |
| Z                                           | 4                                       |
| $\rho$ calcg/cm <sup>3</sup>                | 1.333                                   |
| $\mu$ /mm <sup>-1</sup>                     | 1.739                                   |
| F(000)                                      | 1064.0                                  |
| Crystal size/mm <sup>3</sup>                | 0.14 × 0.07 × 0.05                      |
| Radiation                                   | Cu K $\alpha$ ( $\lambda$ = 1.54184)    |
| 2 $\Theta$ range for data collection/°      | 8.056 to 133.176                        |
| Index ranges                                | -10 ≤ h ≤ 7, -14 ≤ k ≤ 14, -21 ≤ l ≤ 27 |
| Reflections collected                       | 8895                                    |
| Independent reflections                     | 4515 [Rint = 0.0245, Rsigma = 0.0357]   |
| Data/restraints/parameters                  | 4515/0/364                              |
| Goodness-of-fit on F <sup>2</sup>           | 1.027                                   |
| Final R indexes [ $I \geq 2\sigma(I)$ ]     | R1 = 0.0389, wR2 = 0.0915               |
| Final R indexes [all data]                  | R1 = 0.0489, wR2 = 0.0998               |
| Largest diff. peak/hole / e Å <sup>-3</sup> | 0.11/-0.13                              |
| Flack parameter                             | 0.002(11)                               |

### 7.3 X-Ray of 7

**7** was determined by X-ray analysis of the single crystal of (*S,S*)-**7** which was synthesized from (*S,S*)-**S3** material.

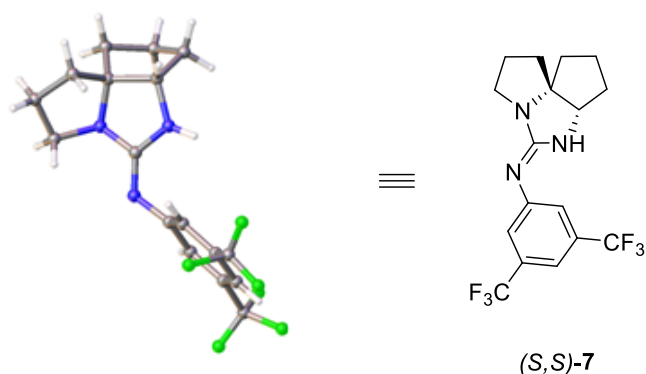

**Table S3. Crystal data and structure refinement for (*S,S*)-7 (CCDC 2048404)**

|                     |   |
|---------------------|---|
| Identification code | 7 |
|---------------------|---|



|                                             |                                                               |
|---------------------------------------------|---------------------------------------------------------------|
| Empirical formula                           | C <sub>17</sub> H <sub>17</sub> F <sub>6</sub> N <sub>3</sub> |
| Formula weight                              | 377.33                                                        |
| Temperature/K                               | 294.03(15)                                                    |
| Crystal system                              | hexagonal                                                     |
| Space group                                 | P61                                                           |
| a/Å                                         | 12.0427(3)                                                    |
| b/Å                                         | 12.0427(3)                                                    |
| c/Å                                         | 22.0973(6)                                                    |
| α/°                                         | 90                                                            |
| β/°                                         | 90                                                            |
| γ/°                                         | 120                                                           |
| Volume/Å <sup>3</sup>                       | 2775.36(17)                                                   |
| Z                                           | 6                                                             |
| ρ <sub>calc</sub> /cm <sup>3</sup>          | 1.358                                                         |
| μ/mm <sup>-1</sup>                          | 1.091                                                         |
| F(000)                                      | 1170.0                                                        |
| Crystal size/mm <sup>3</sup>                | 0.18 × 0.15 × 0.12                                            |
| Radiation                                   | Cu Kα (λ = 1.54184)                                           |
| 2θ range for data collection/°              | 8.478 to 139.658                                              |
| Index ranges                                | -11 ≤ h ≤ 14, -8 ≤ k ≤ 11, -26 ≤ l ≤ 26                       |
| Reflections collected                       | 6679                                                          |
| Independent reflections                     | 3199 [R <sub>int</sub> = 0.0297, R <sub>sigma</sub> = 0.0345] |
| Data/restraints/parameters                  | 3199/85/325                                                   |
| Goodness-of-fit on F <sup>2</sup>           | 1.058                                                         |
| Final R indexes [I ≥ 2σ (I)]                | R <sub>1</sub> = 0.0471, wR <sub>2</sub> = 0.1121             |
| Final R indexes [all data]                  | R <sub>1</sub> = 0.0621, wR <sub>2</sub> = 0.1292             |
| Largest diff. peak/hole / e Å <sup>-3</sup> | 0.12/-0.18                                                    |
| Flack parameter                             | 0.28(12)                                                      |

---

## 8. References

- (a) A. Skrzyńska, A. Przydacz and Ł. Albrecht, *Org. Lett.*, 2015, **17**, 5682-5685; (b) D. S. Ryabukhin, D. N. Zakusilo, M. O. Kompanets, A. A. Tarakanov, I. A. Boyarskaya, T. O. Artamonova, M. A. Khohodorkovskiy, I. O. Opeida and A. V. Vasilyev, *Beilstein J. Org. Chem.*, 2016, **12**, 2125-2135; (c) Y.-L. Su, Z.-Y. Han, Y.-H. Li and L.-Z. Gong, *ACS Catal.*, 2017, **7**, 7917-7922.
- (a) Y.-C. Wu, L. Liu, H.-J. Li, D. Wang and Y.-J. Chen, *J. Org. Chem.*, 2006, **71**, 6592-

- 6595; (b) P. Xing, W. Zang, Z.-G. Huang, Y.-X. Zhan, C.-J. Zhu and B. Jiang, *Synlett*, 2012, **23**, 2269-2273; (c) M. Dajek, A. Pruszczyńska, K. A. Konieczny and R. Kowalczyk, *Adv. Synth. Catal.*, 2020, **362**, 3613-3620; (d) M. Espinosa, A. García-Ortiz, G. Blay, L. Cardona, M. C. Muñoz and J. R. Pedro, *RSC Adv.*, 2016, **6**, 15655; (e) Q. Meng, L. Zhu and Z. Zhang, *J. Org. Chem.*, 2008, **73**, 7209-7212.
- 3 J.-M. Tian, Y.-H. Yuan, Y.-Q. Tu, F.-M. Zhang, X.-B. Zhang, S.-H. Zhang, S.-H. Wang and X.-M. Zhang, *Chem. Commun.*, 2015, **51**, 9979-9982.
  - 4 Y.-H. Yuan, X. Han, F.-P. Zhu, J.-M. Tian, F.-M. Zhang, X.-M. Zhang, Y.-Q. Tu, S.-H. Wang and X. Guo, *Nat. Commun.*, 2019, **10**, 3394.
  - 5 C.-L. Cao, M.-C. Ye, X.-L. Sun and Y. Tang, *Org. Lett.*, 2006, **8**, 2901-2904.

## 9. Copies of NMR spectra

9.510  
7.331  
7.316  
7.312  
7.308  
7.300  
7.295  
7.265  
7.262  
7.248  
7.228  
7.147  
7.138  
6.176  
6.167  
4.036

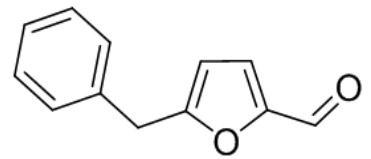

1a

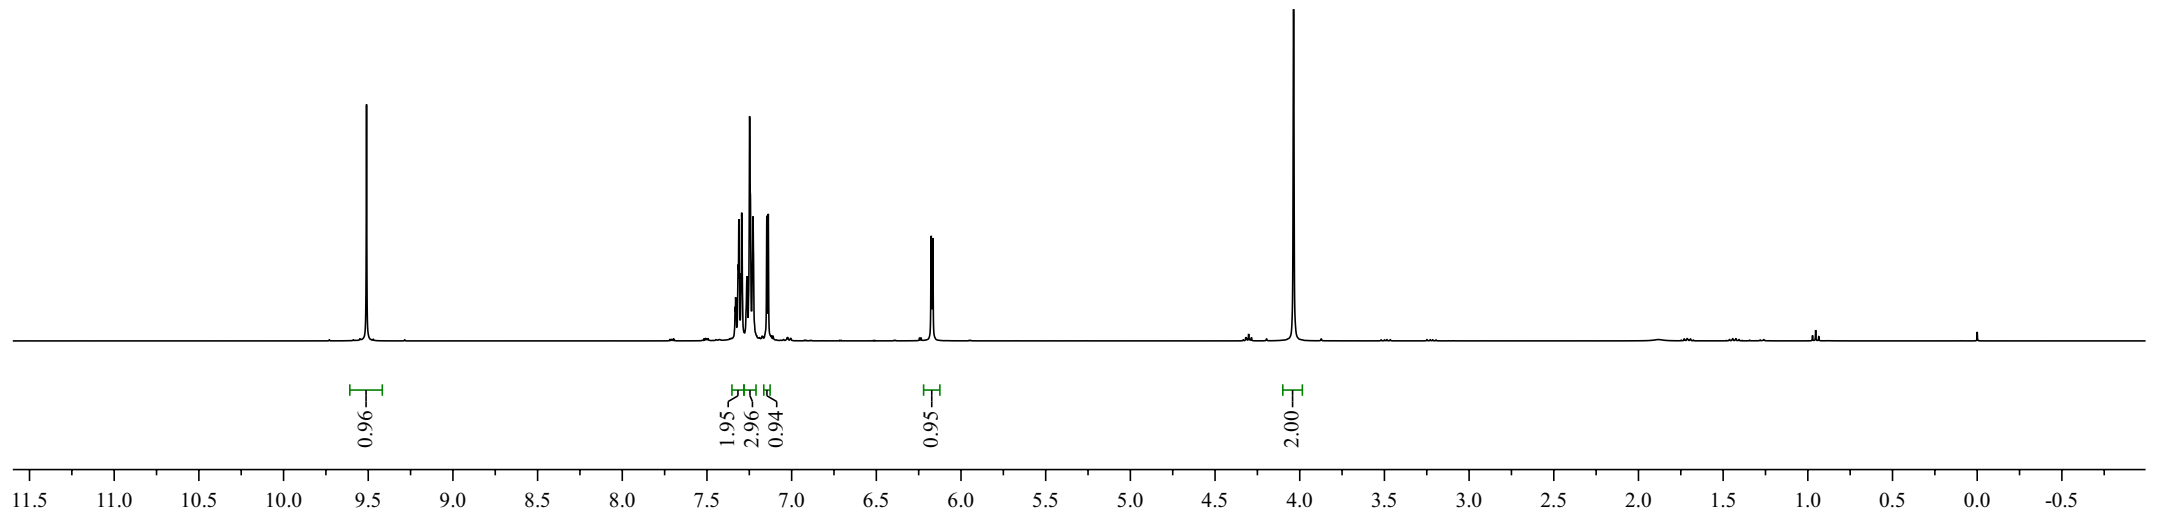

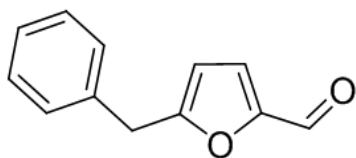

**1a**

— 177.048

— 161.868

— 152.032

— 135.982

— 128.732

— 128.622

— 126.915

— 123.081

— 109.646

— 34.685

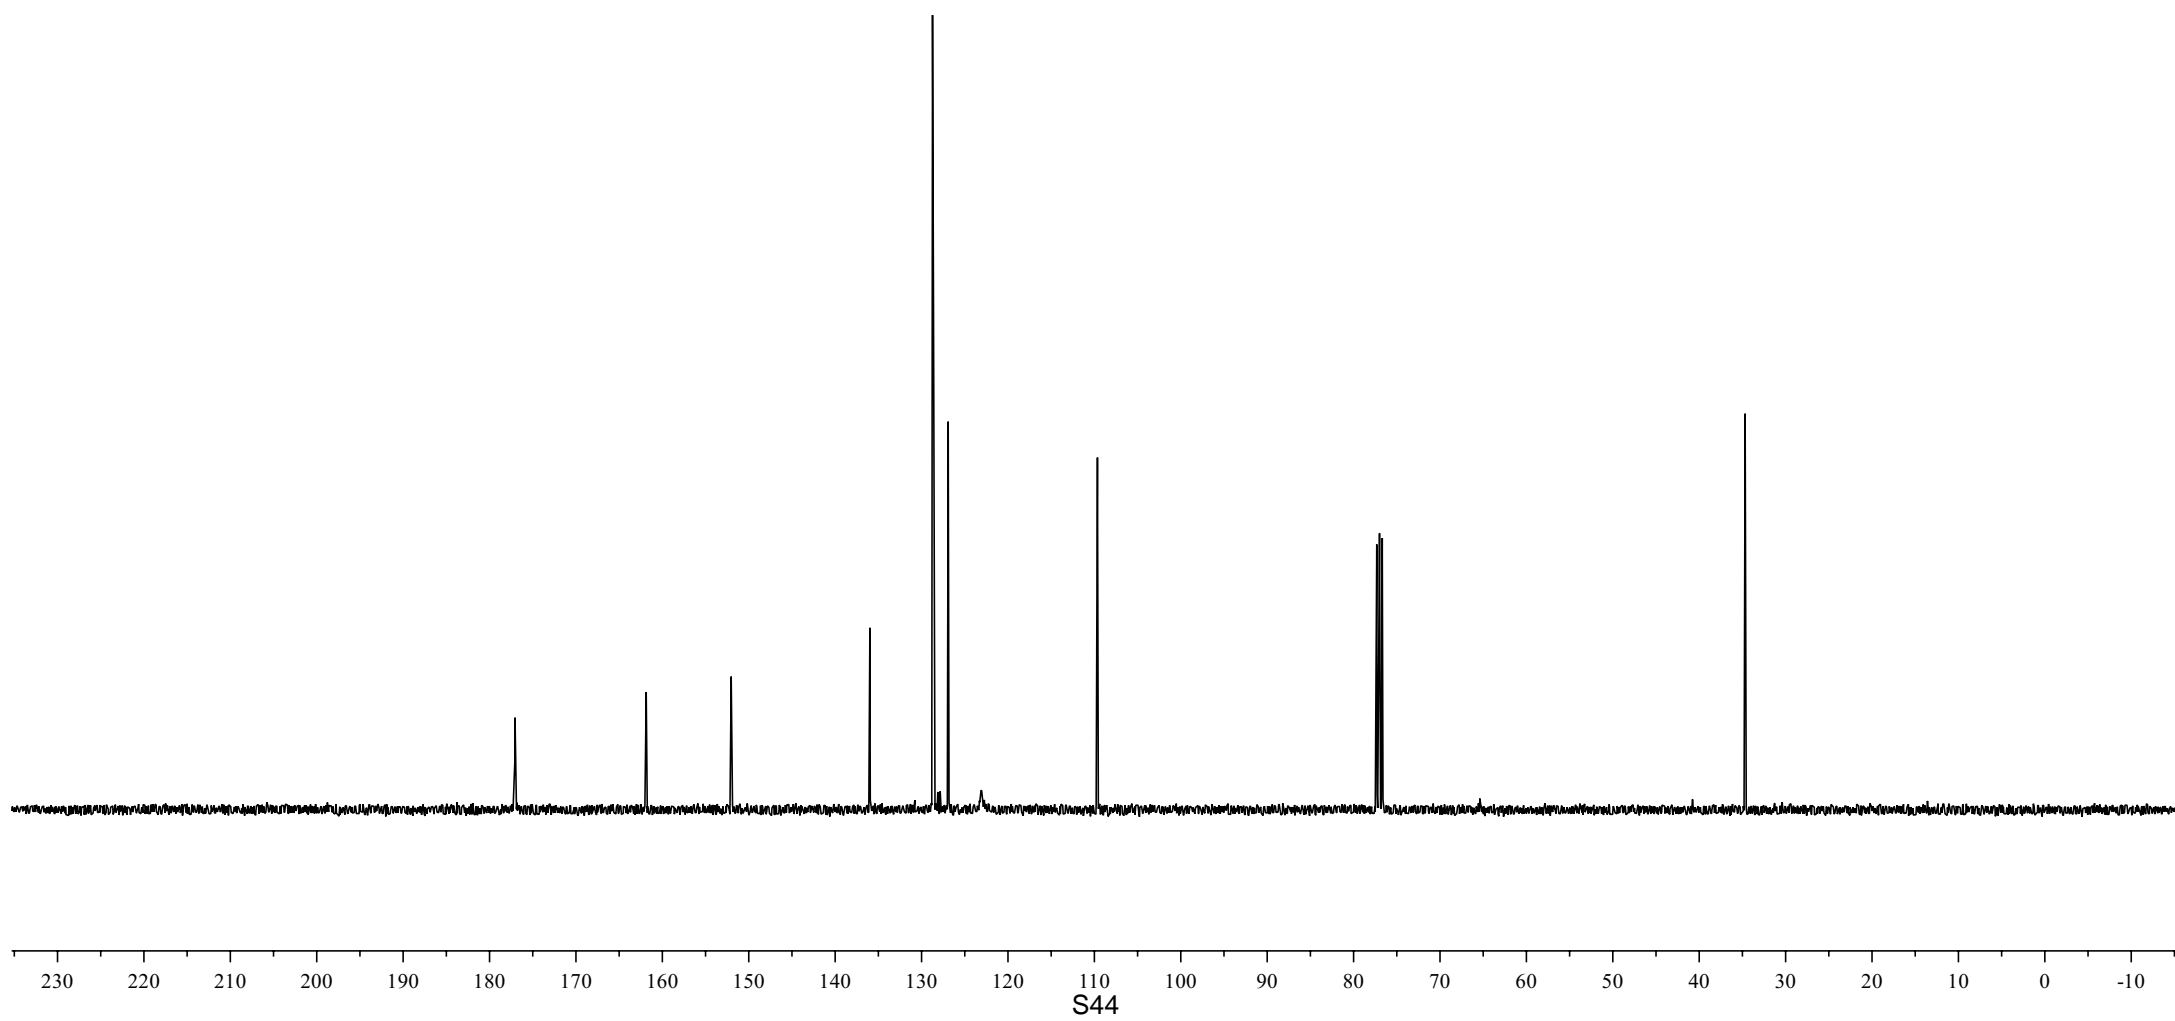

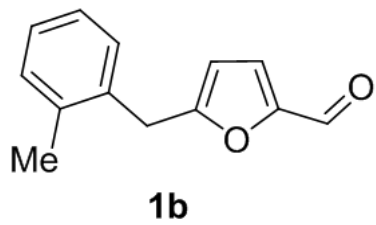

—9.500

7.176  
7.172  
7.167  
7.156  
7.147  
7.141  
7.130  
7.122

6.049  
6.040

—4.019

—2.271

0.95

4.89

0.96

2.00

2.98

12.0 11.5 11.0 10.5 10.0 9.5 9.0 8.5 8.0 7.5 7.0 6.5 6.0 5.5 5.0 4.5 4.0 3.5 3.0 2.5 2.0 1.5 1.0 0.5 0.0 -0.5 -1.0

S45

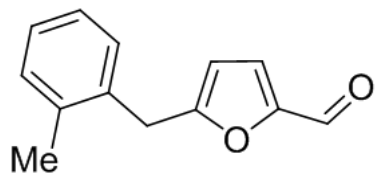

**1b**

— 176.927  
— 161.589  
— 151.926  
/ 136.254  
/ 134.190  
/ 130.346  
/ 129.606  
/ 127.212  
/ 126.166  
/ 123.083

— 109.559

— 32.433

— 19.206

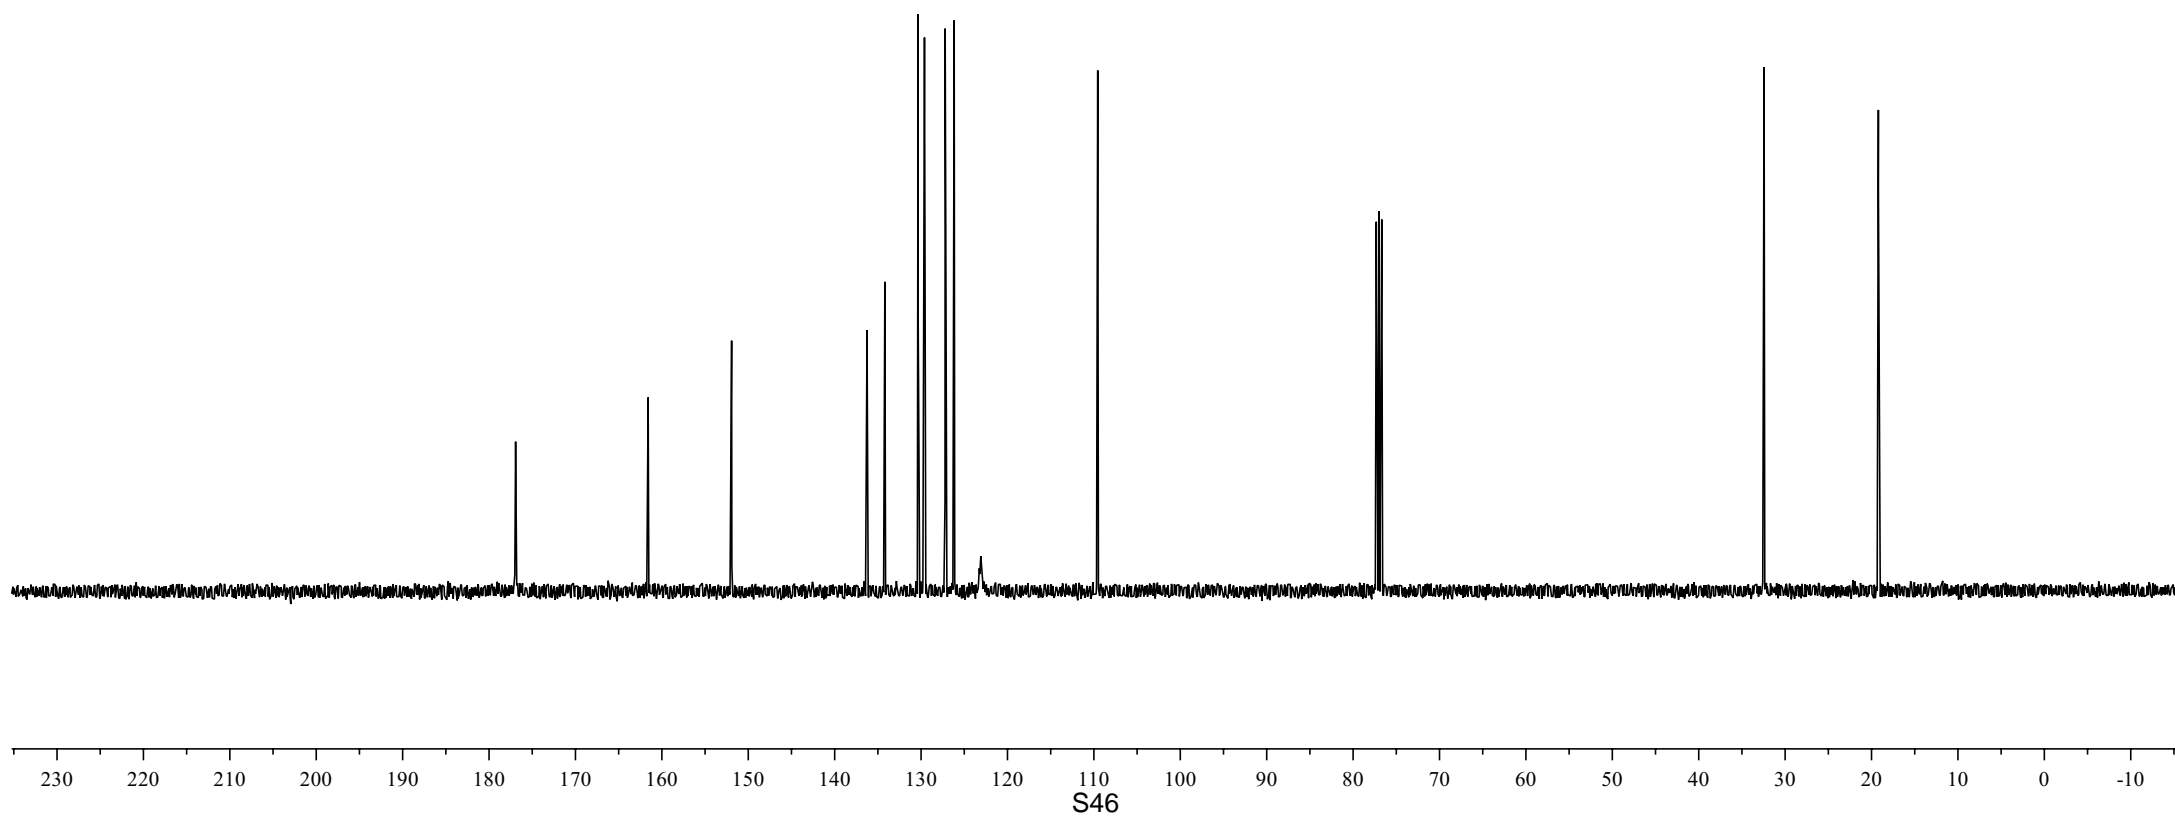

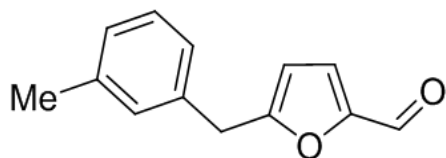

**1c**

—9.503

7.216  
7.198  
7.195  
7.180  
7.177  
7.143  
7.135  
7.066  
7.046  
7.025  
6.179  
6.170

—3.992

—2.315

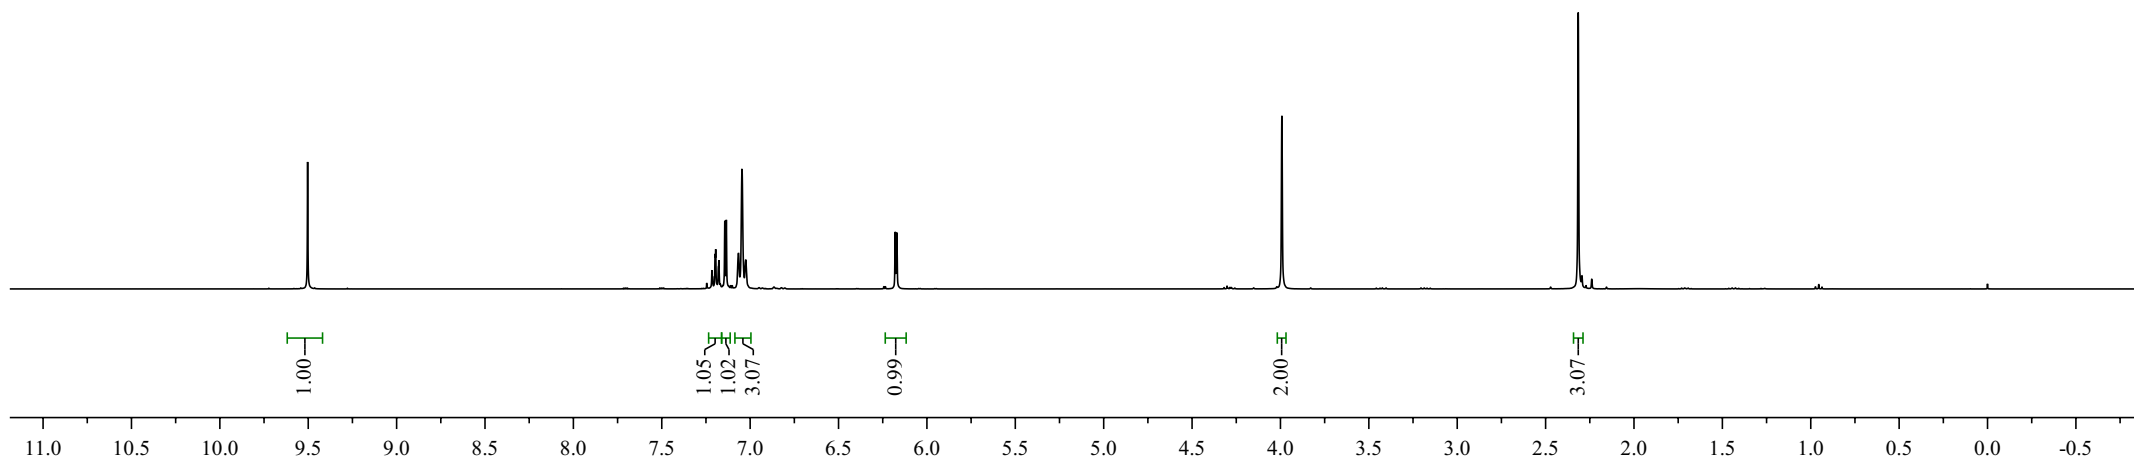

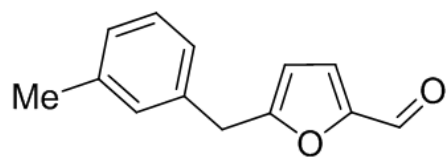

**1c**

— 177.020

— 162.028

— 151.985

— 138.249

— 135.873

— 129.461

— 128.483

— 127.630

— 125.736

— 123.112

— 109.584

— 34.594

— 21.174

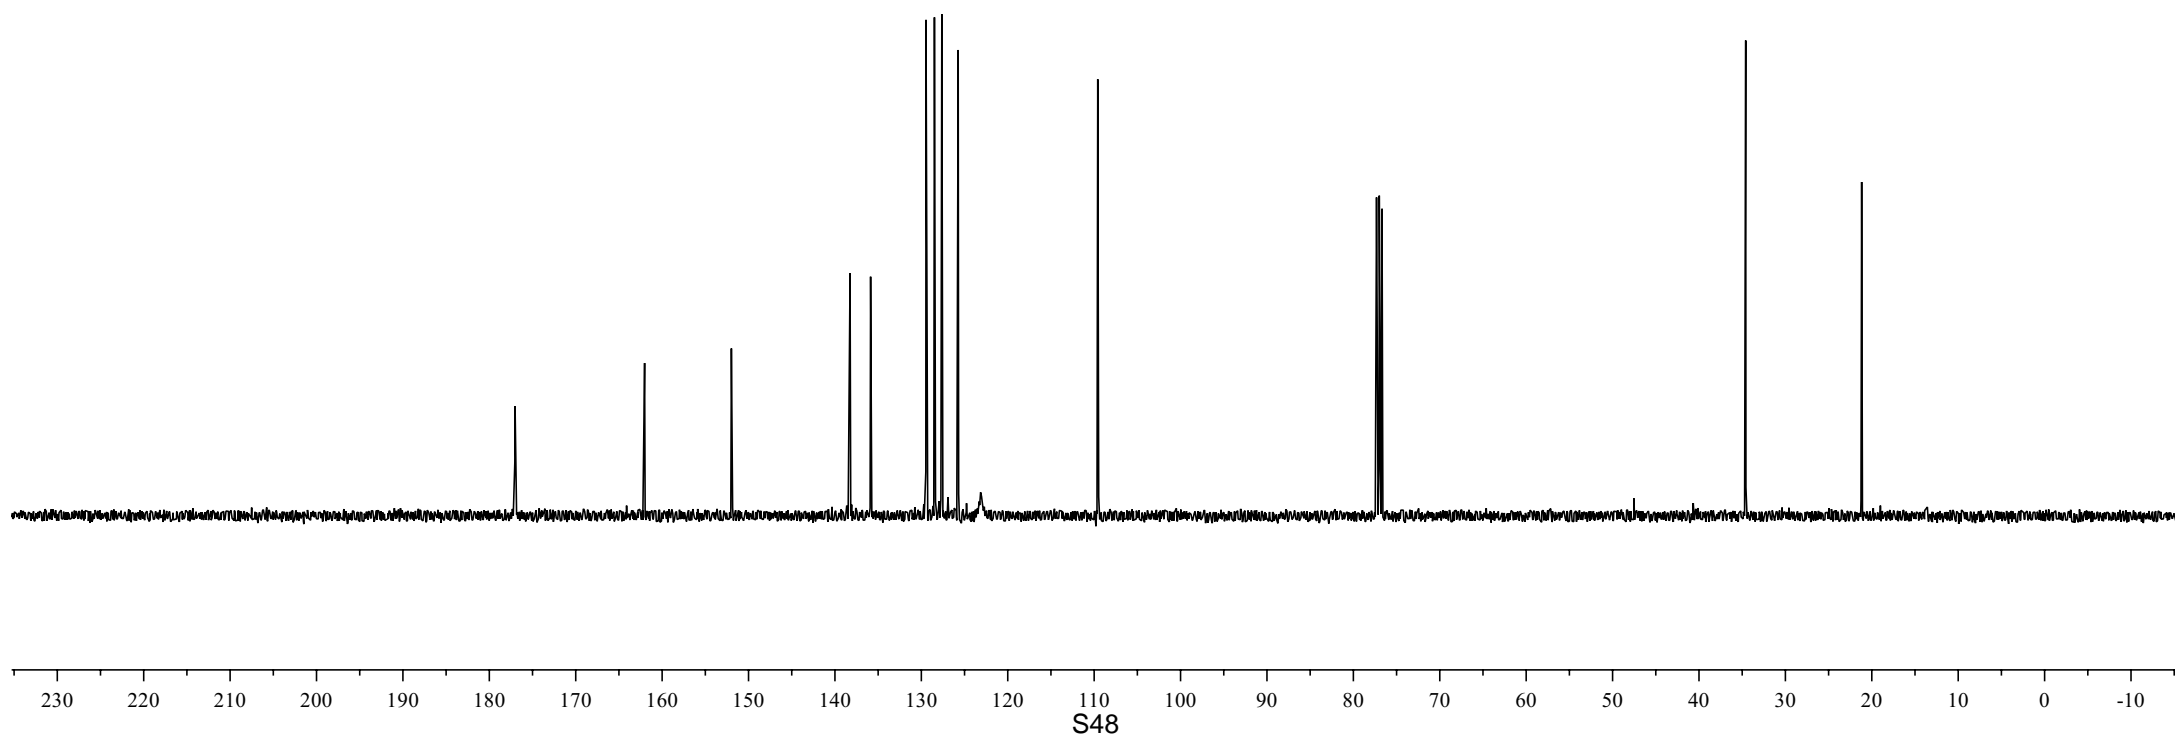



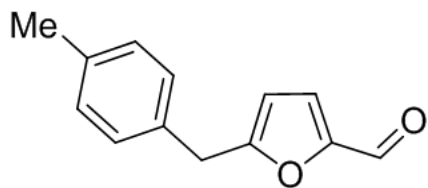

**1d**

—9.483

7.125  
7.113

6.154  
6.145

—3.975

—2.301

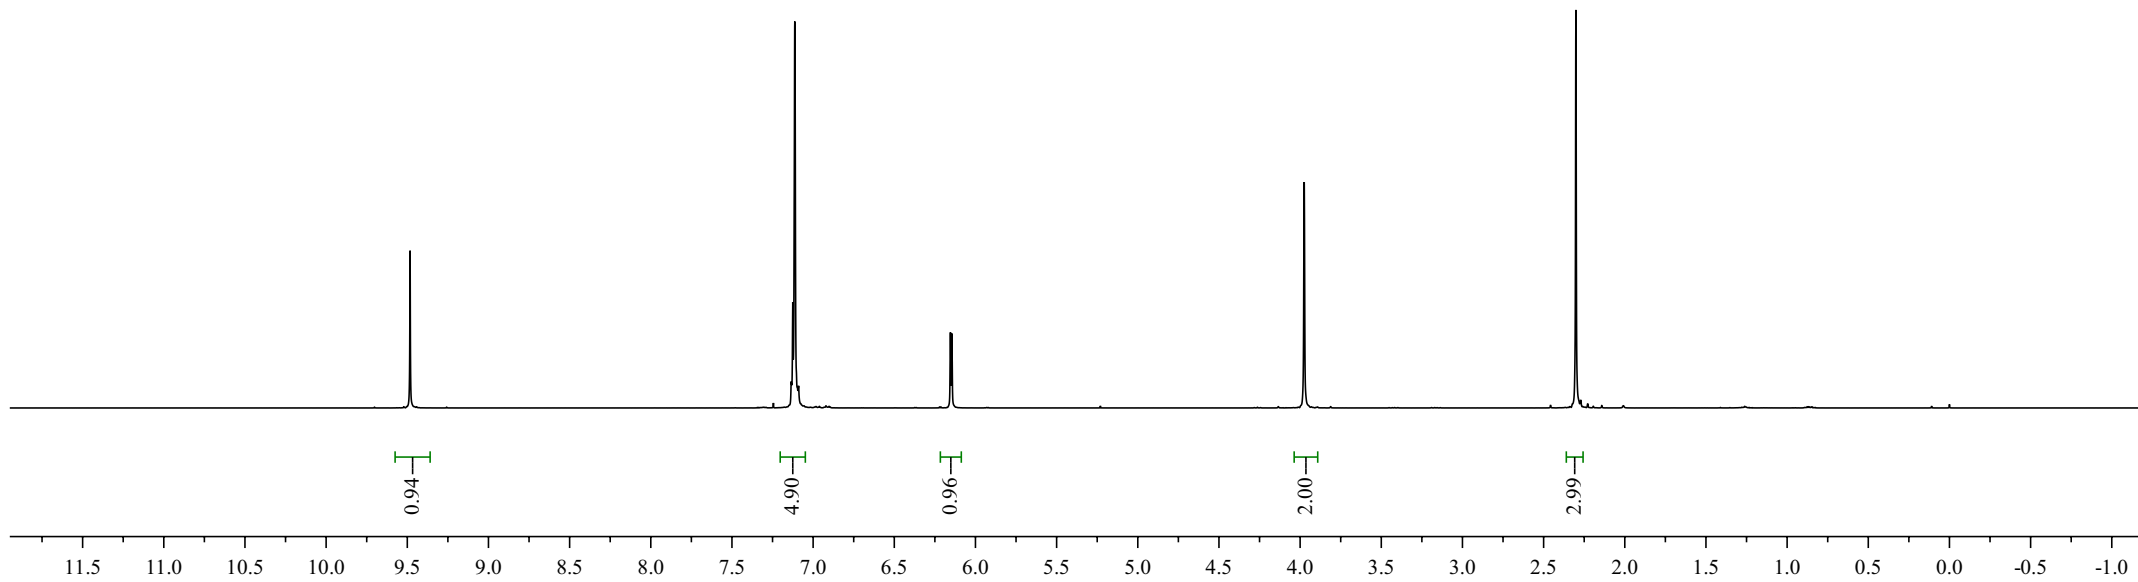

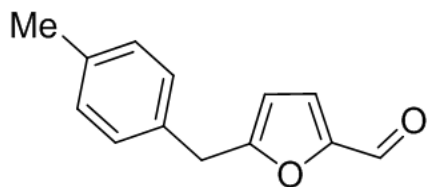

**1d**

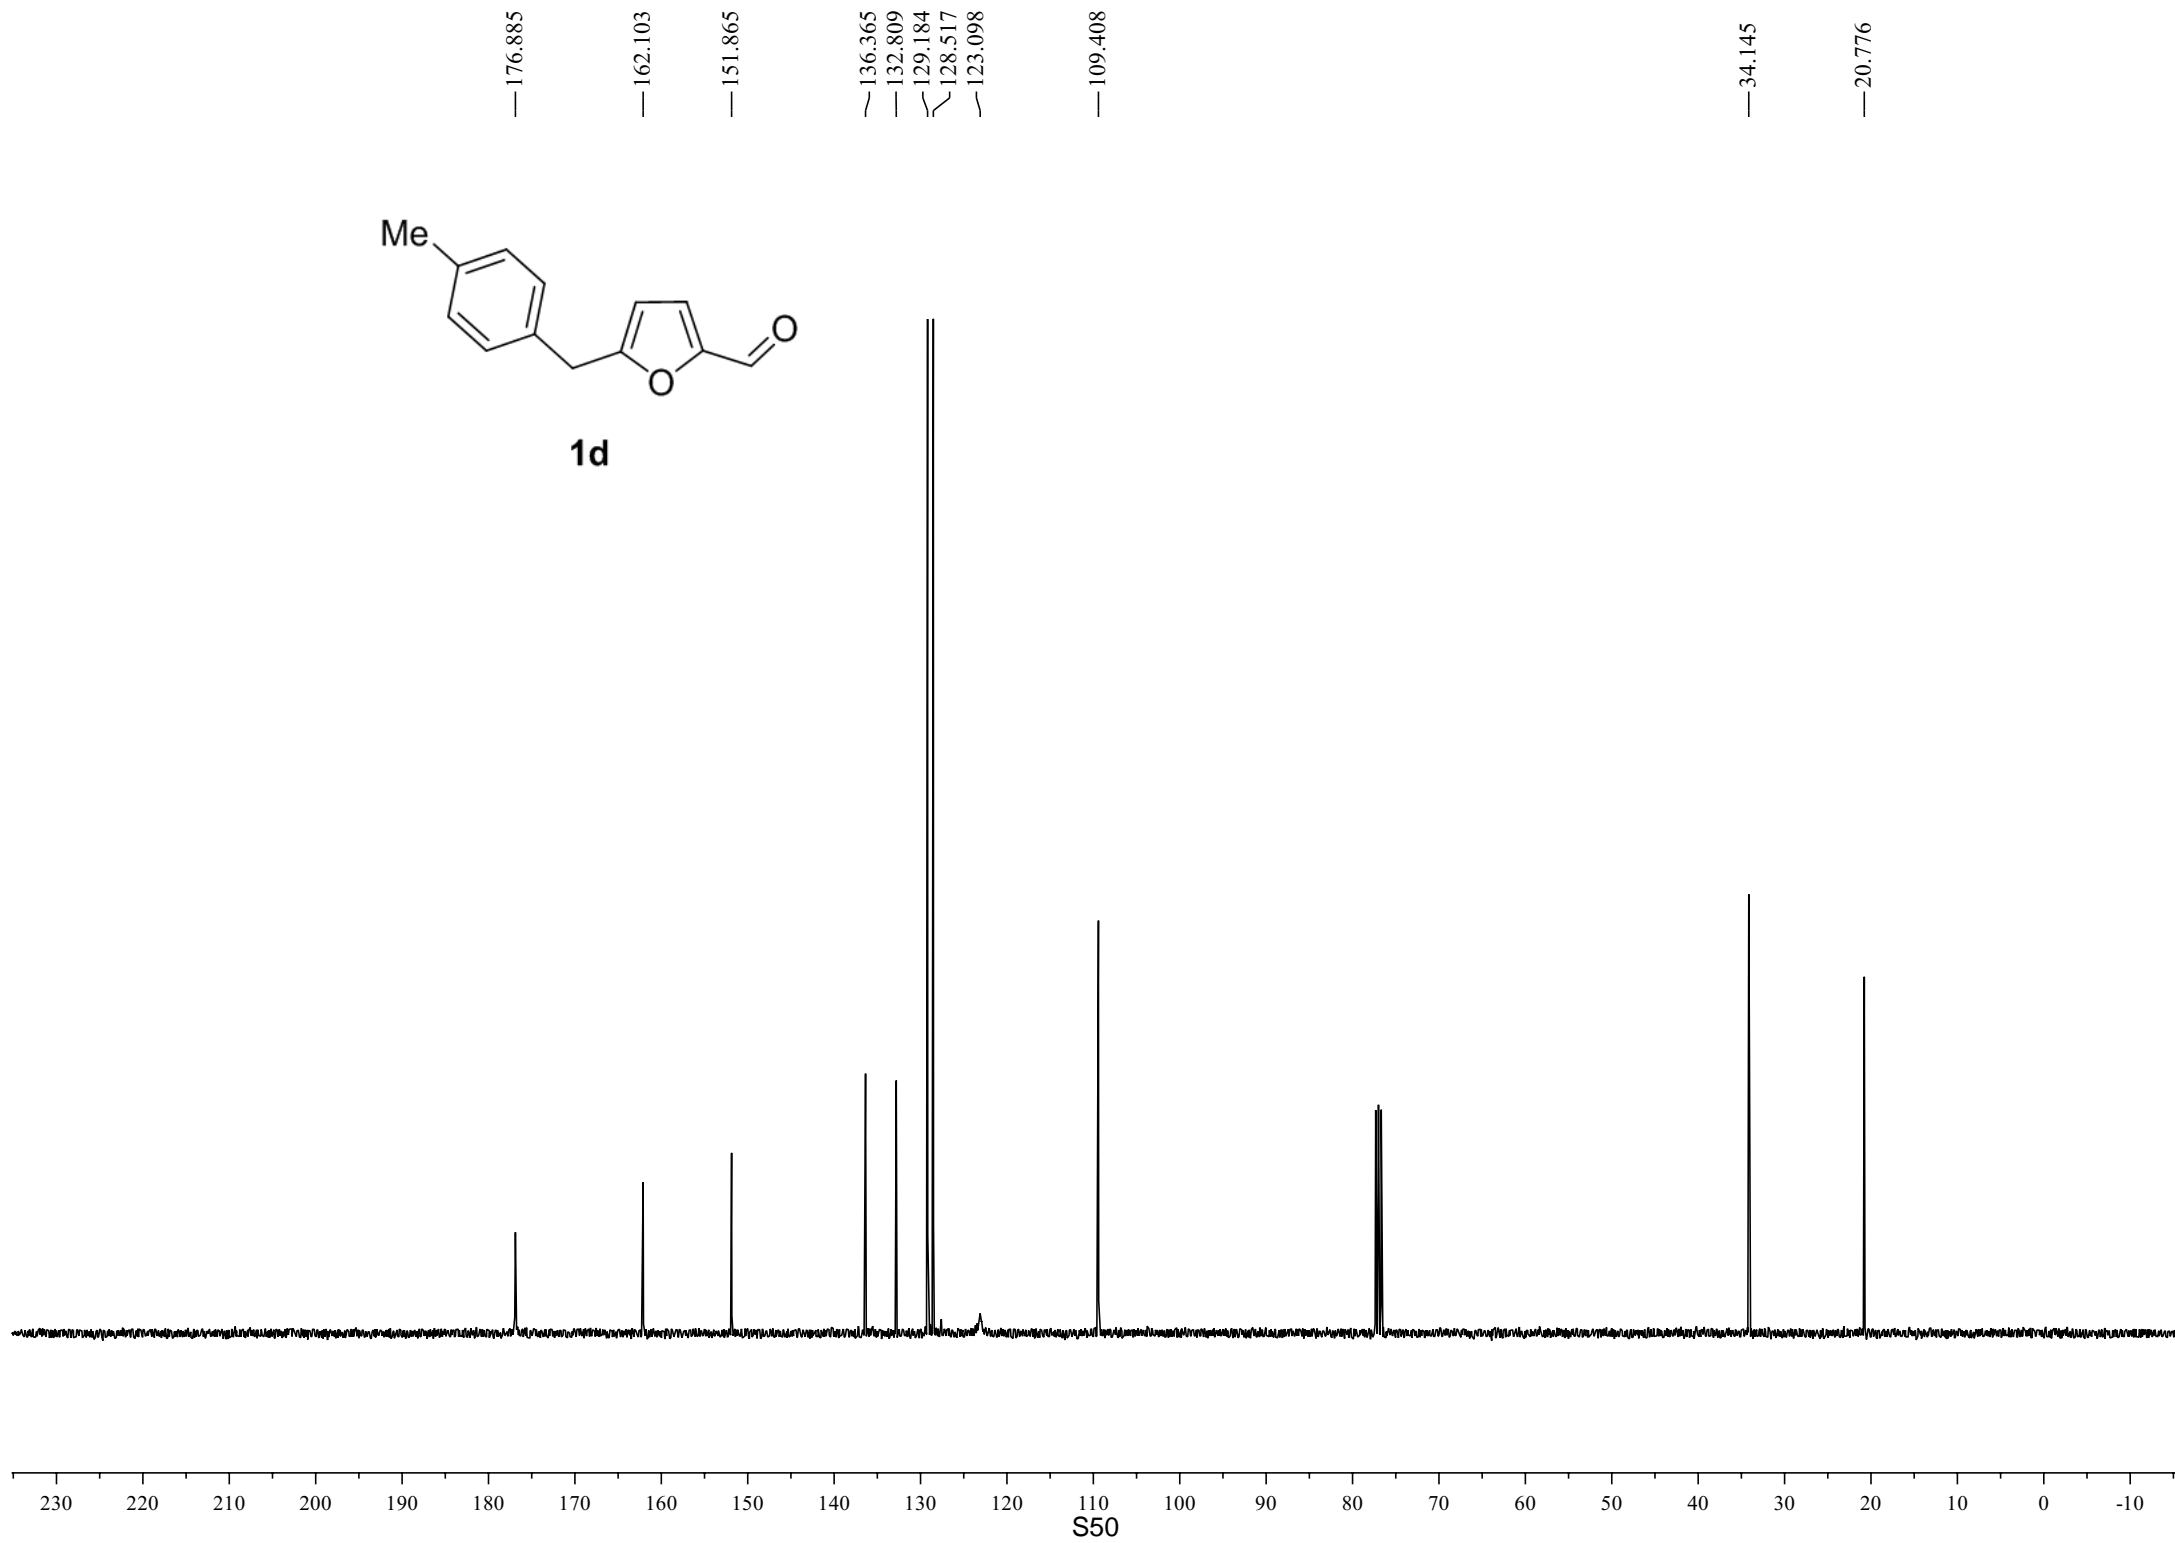

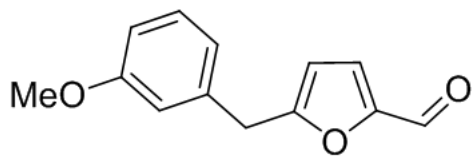

**1e**

—9.508

7.246  
7.243  
7.228  
7.225  
7.209  
7.206  
7.152  
7.143  
6.836  
6.817  
6.808  
6.802  
6.785  
6.202  
6.193

—4.008

—3.768

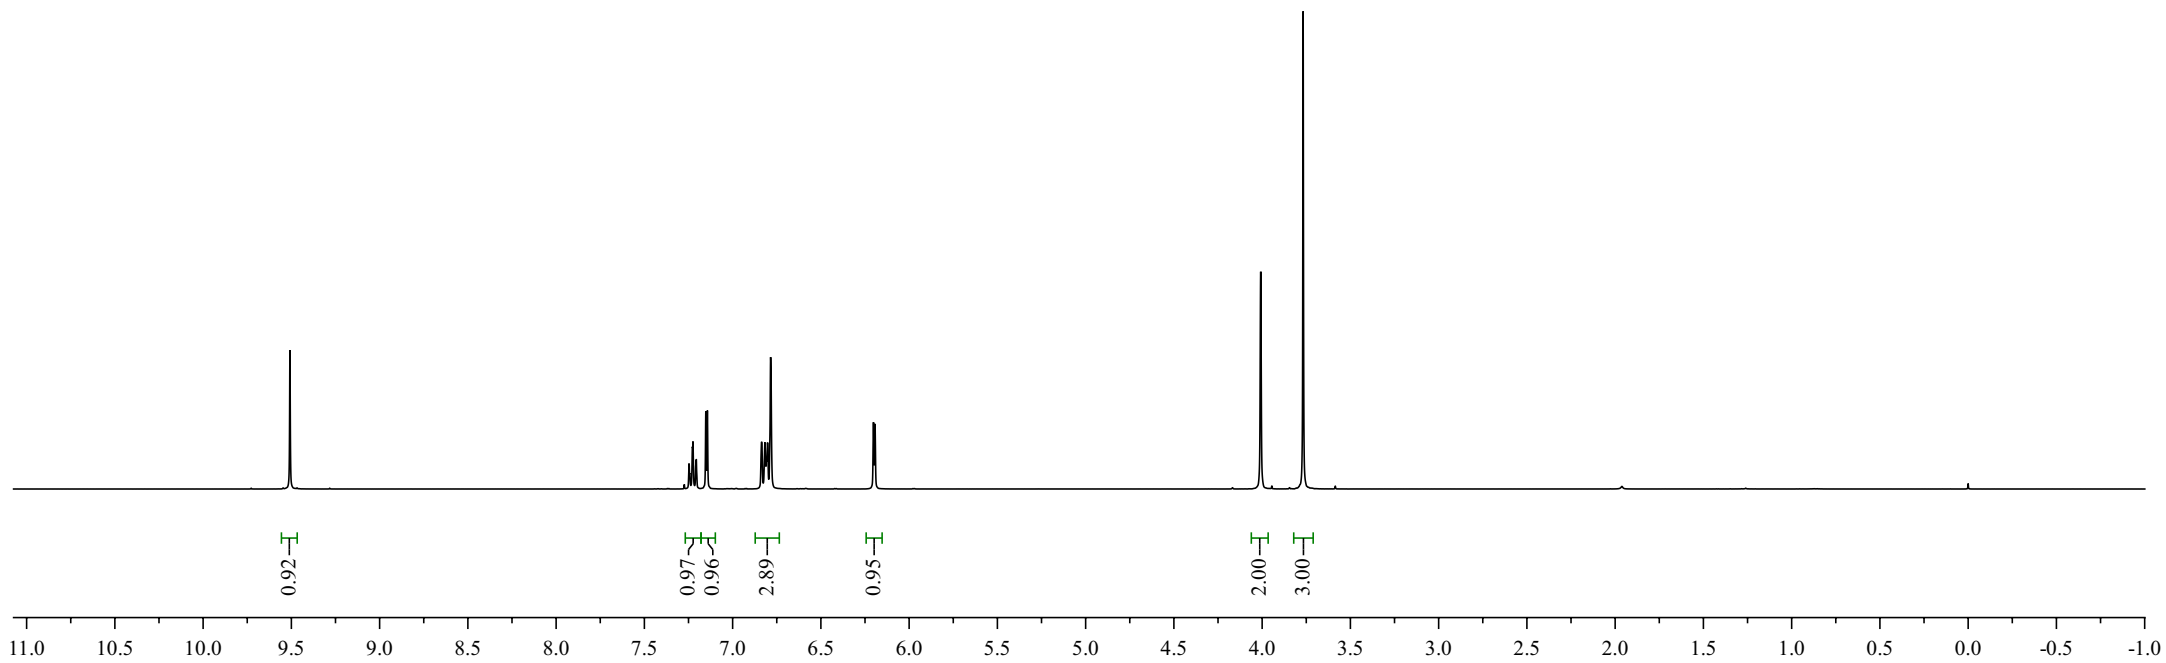

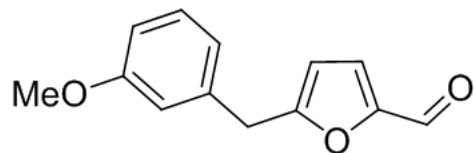

**1e**

— 176.994

~ 161.645

~ 159.670

— 151.976

— 137.441

— 129.578

~ 123.064

~ 121.006

~ 114.522

— 112.127

~ 109.655

— 54.972

— 34.615

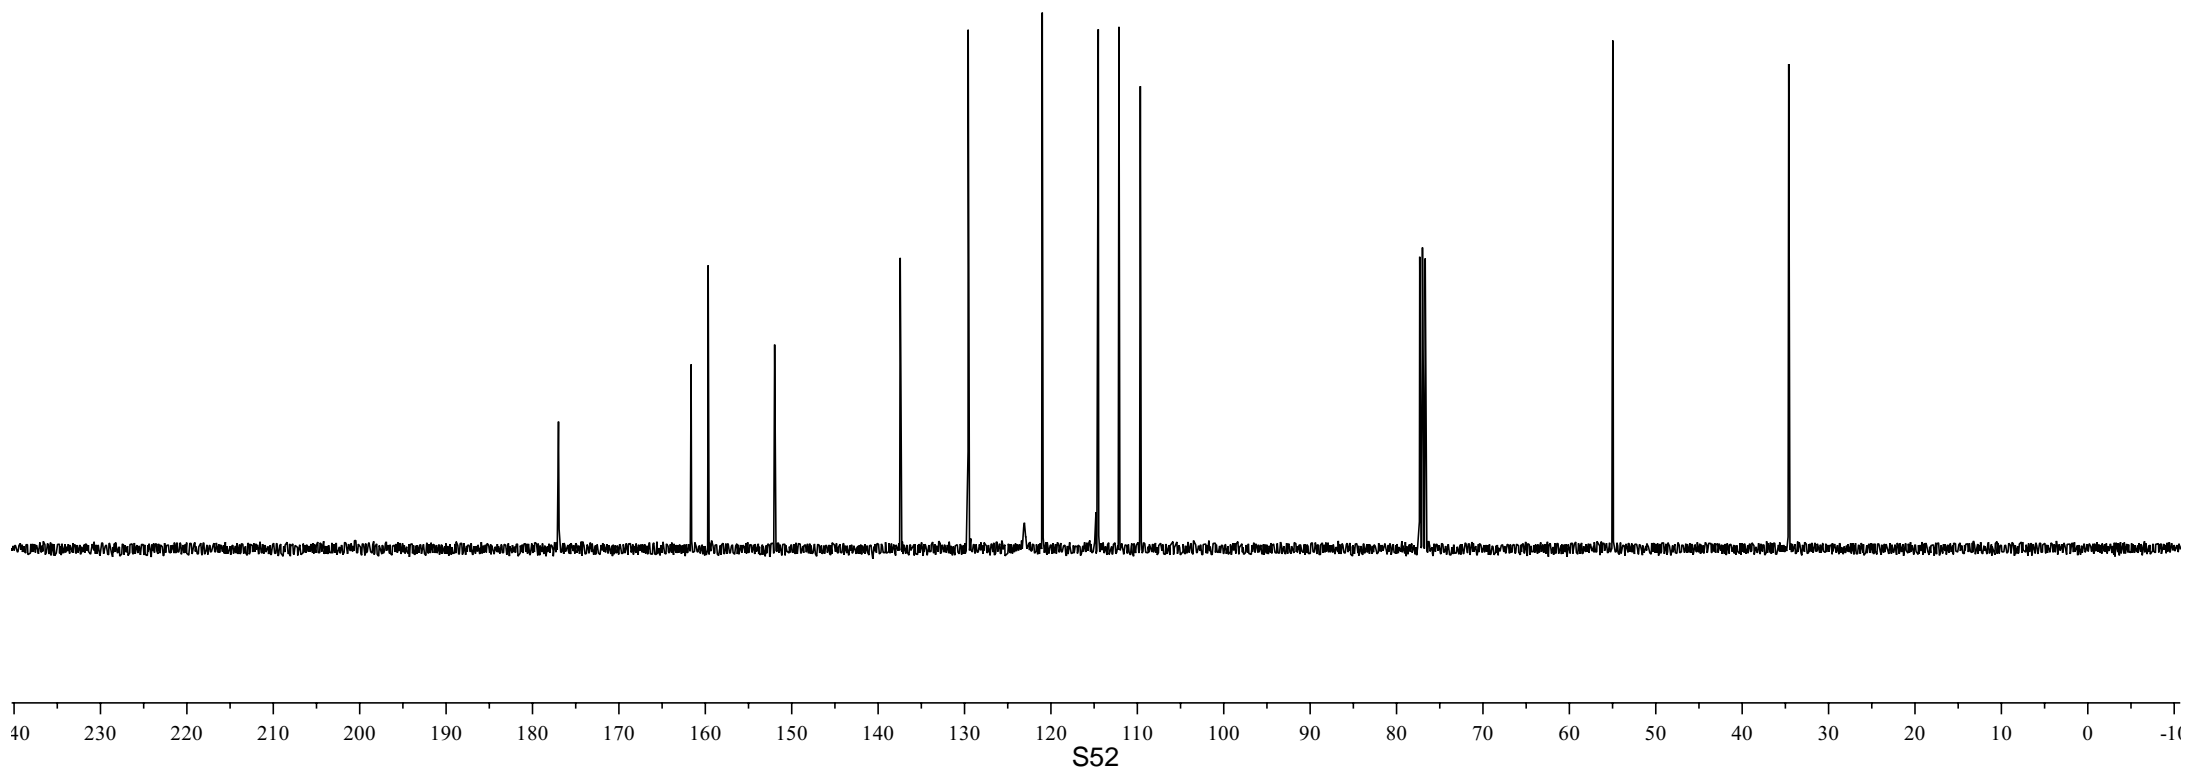

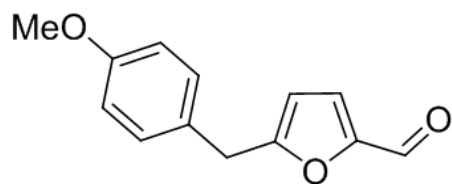

**1f**

—9.483

7.153  
7.131  
7.122  
6.845  
6.827  
6.823

6.144  
6.137

3.956  
3.752  
3.747

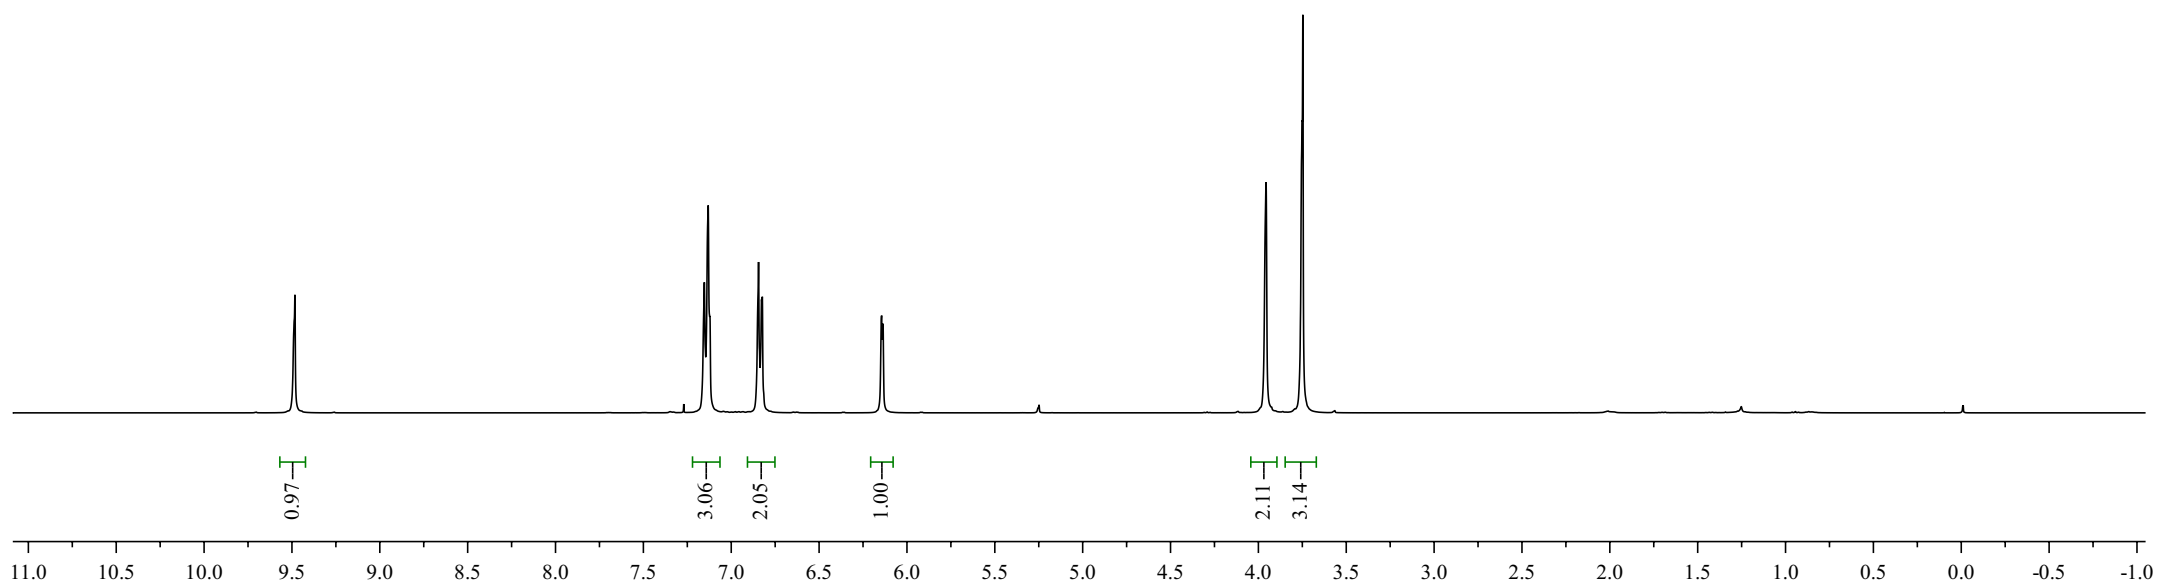



**1f**

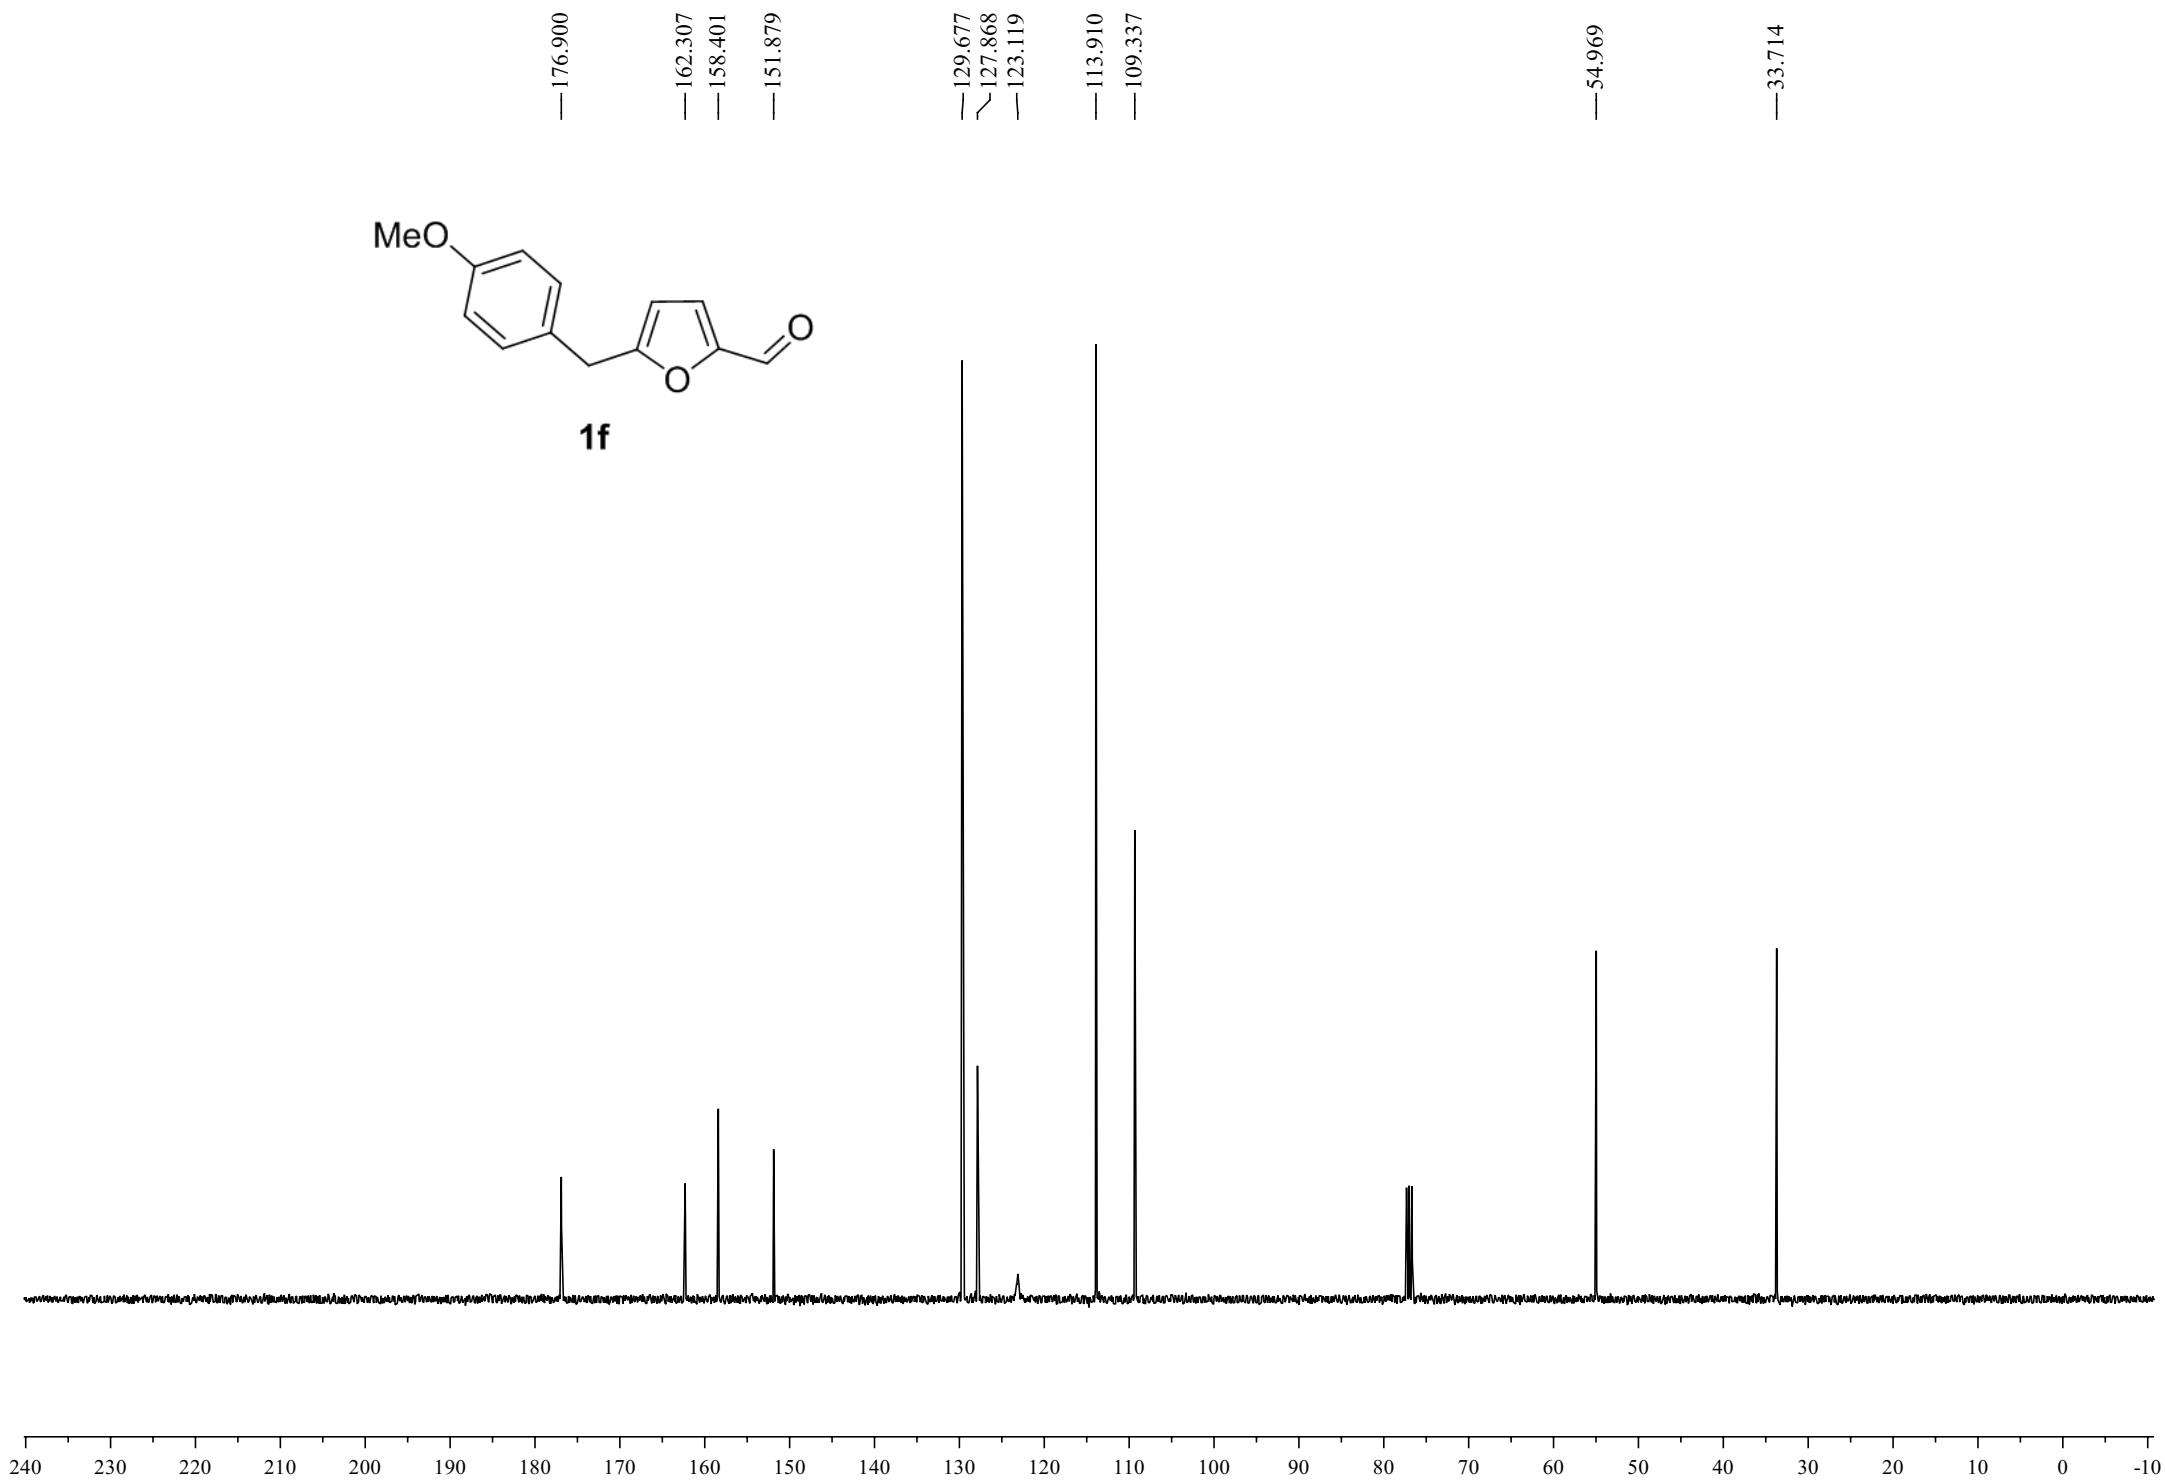

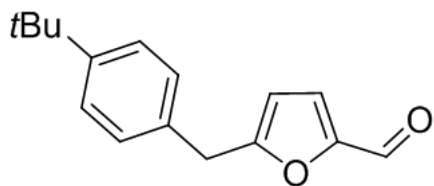

**1g**

9.508

7.348  
7.343  
7.332  
7.327  
7.186  
7.165  
7.142  
7.134  
6.191  
6.182

4.008

1.300

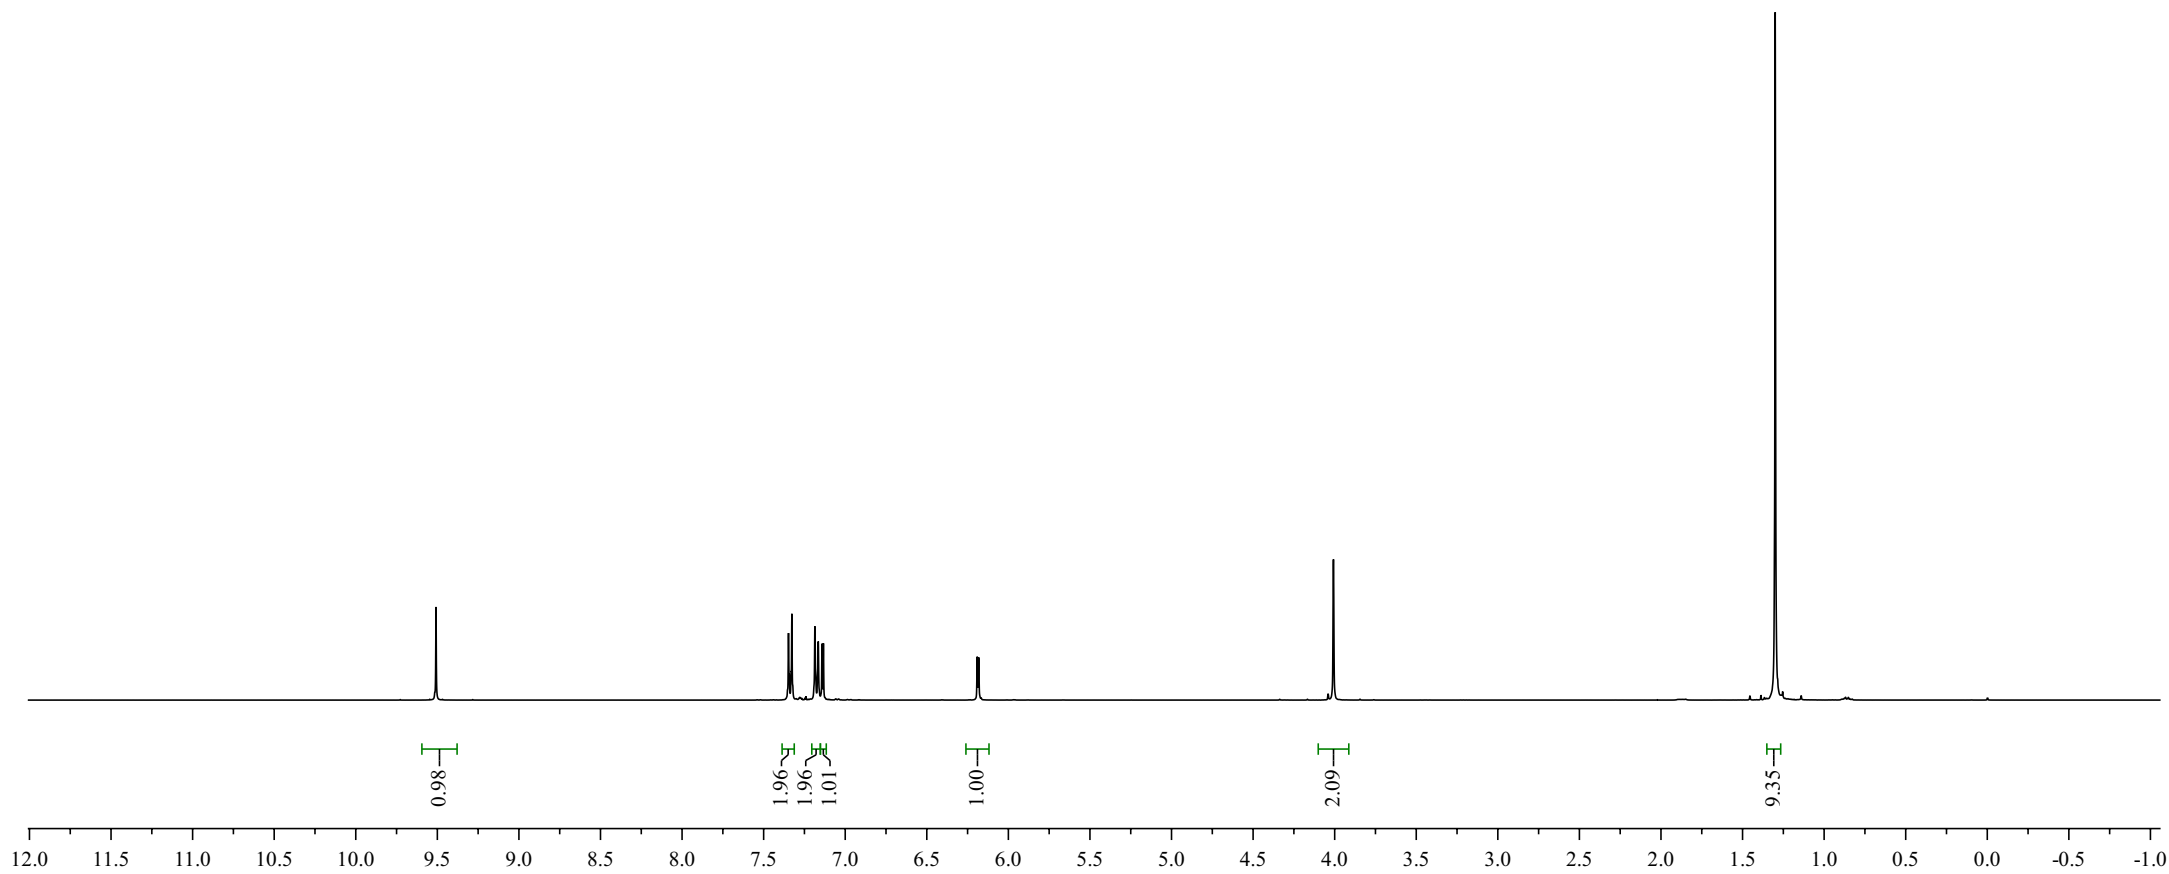

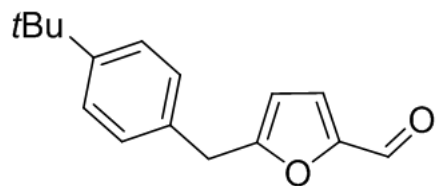

**1g**

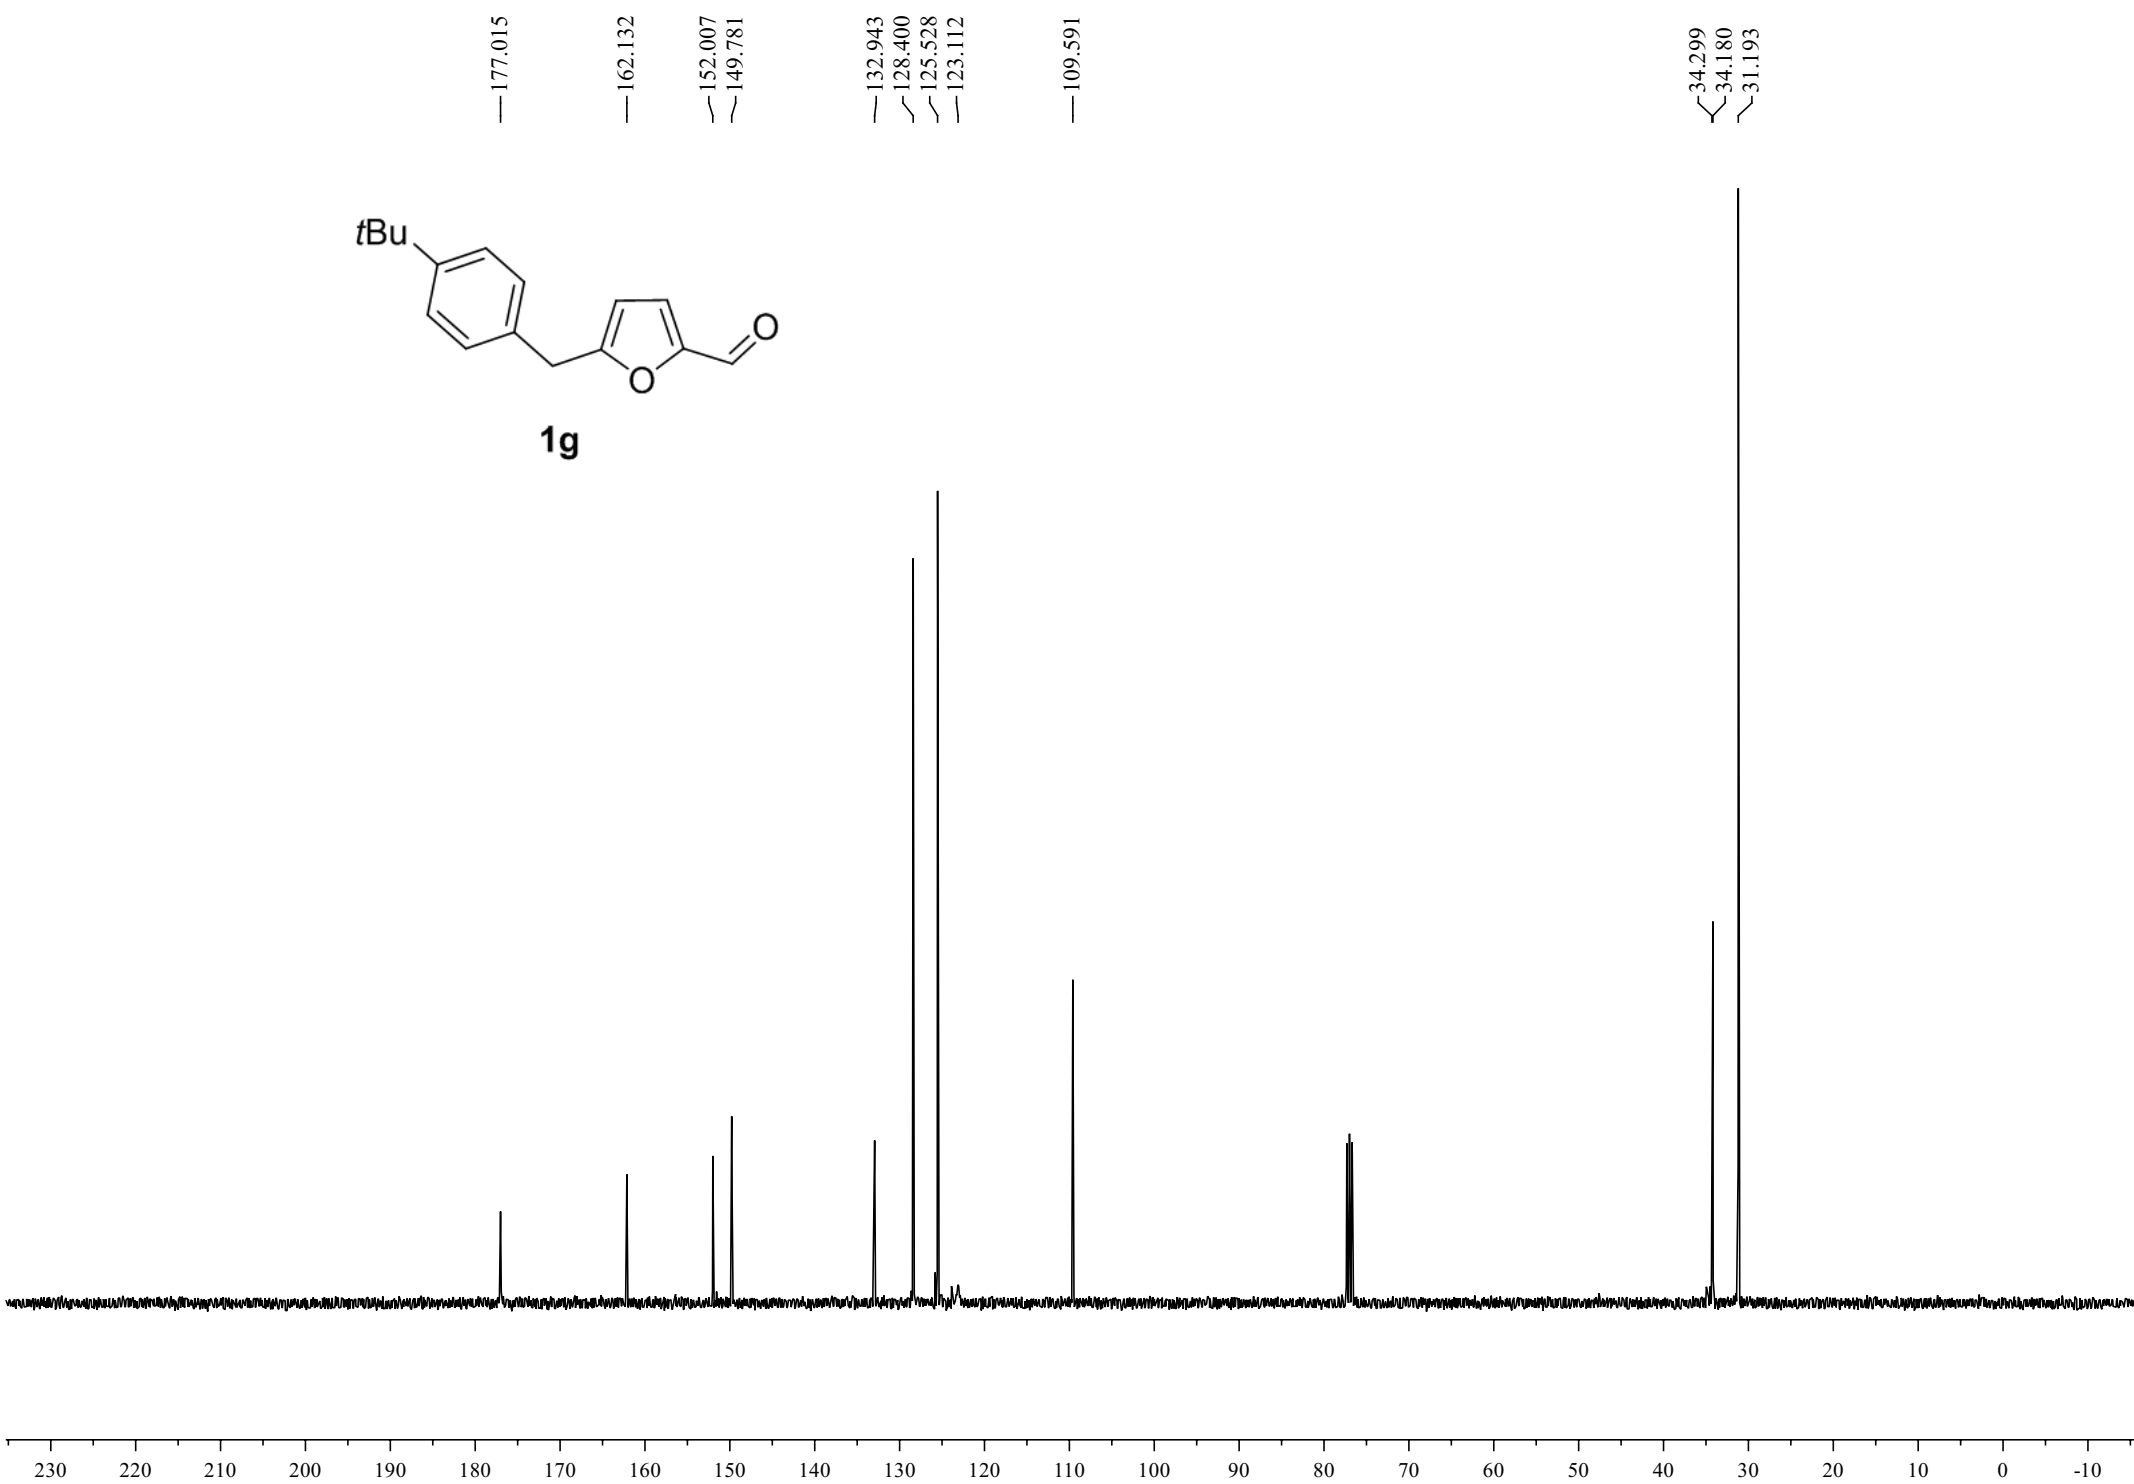



9.525

7.567  
7.548  
7.275  
7.272  
7.269  
7.261  
7.259  
7.167  
7.158  
7.153  
7.144  
7.133  
6.195  
6.186

4.182

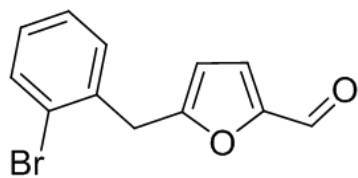

1h

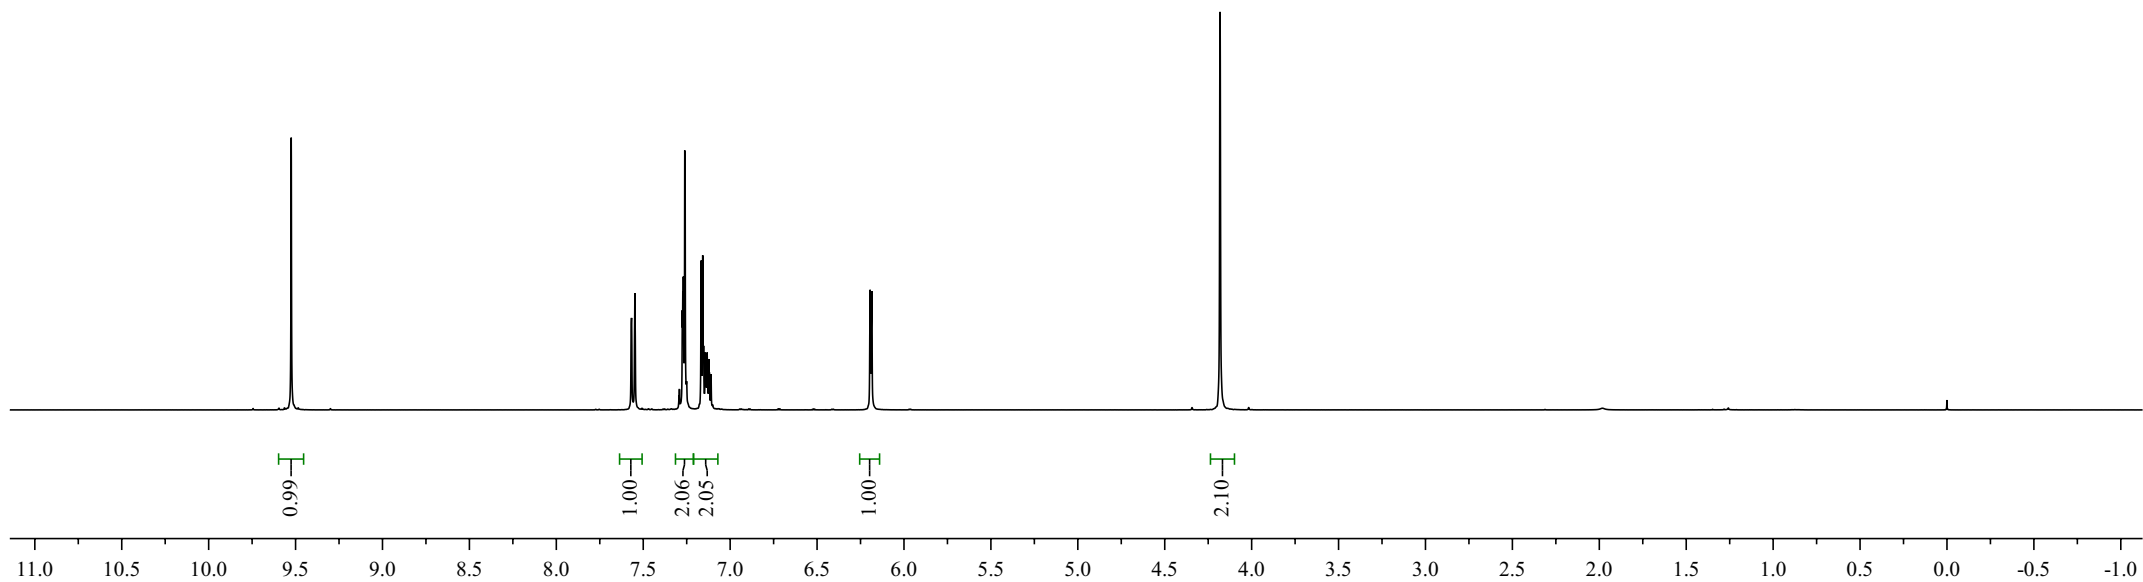



**1h**

— 176.974

— 160.019

— 151.977

135.540

132.844

130.839

128.737

127.661

124.283

123.106

— 110.171

— 34.997

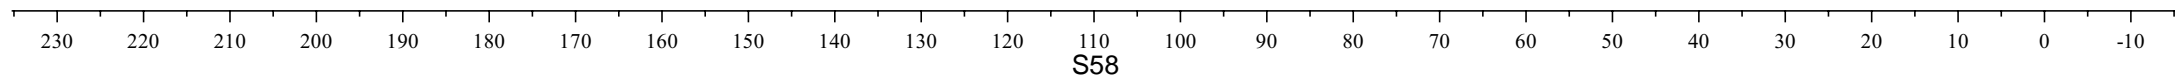

—9.541

7.404  
7.401  
7.397  
7.389  
7.384  
7.200  
7.194  
7.189  
7.183  
7.177  
7.168  
6.229  
6.220

—4.024

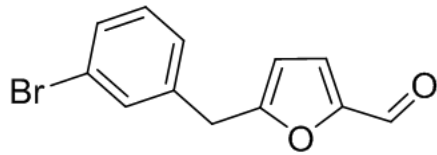

**1i**

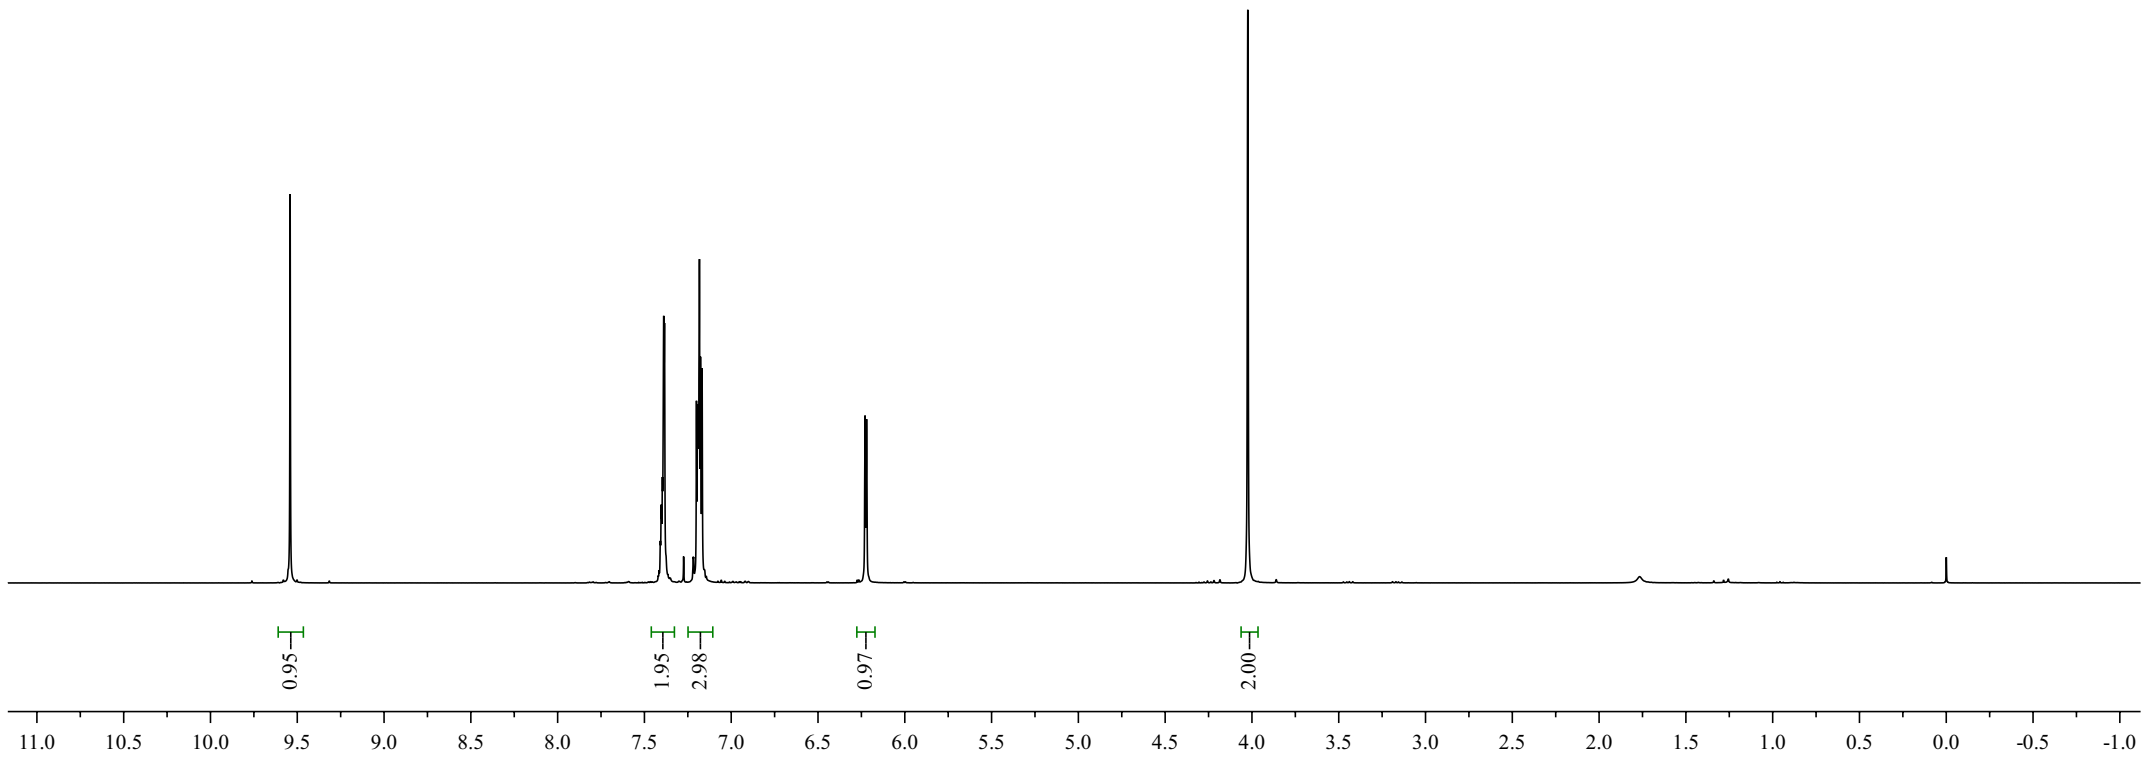

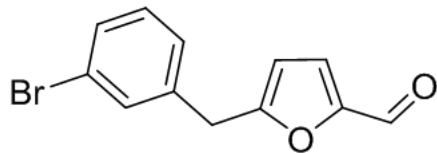

**1i**

— 177.143

— 160.700

— 152.245

— 138.274

— 131.754

— 130.253

— 130.173

— 127.467

— 123.004

— 122.636

— 109.967

— 34.278

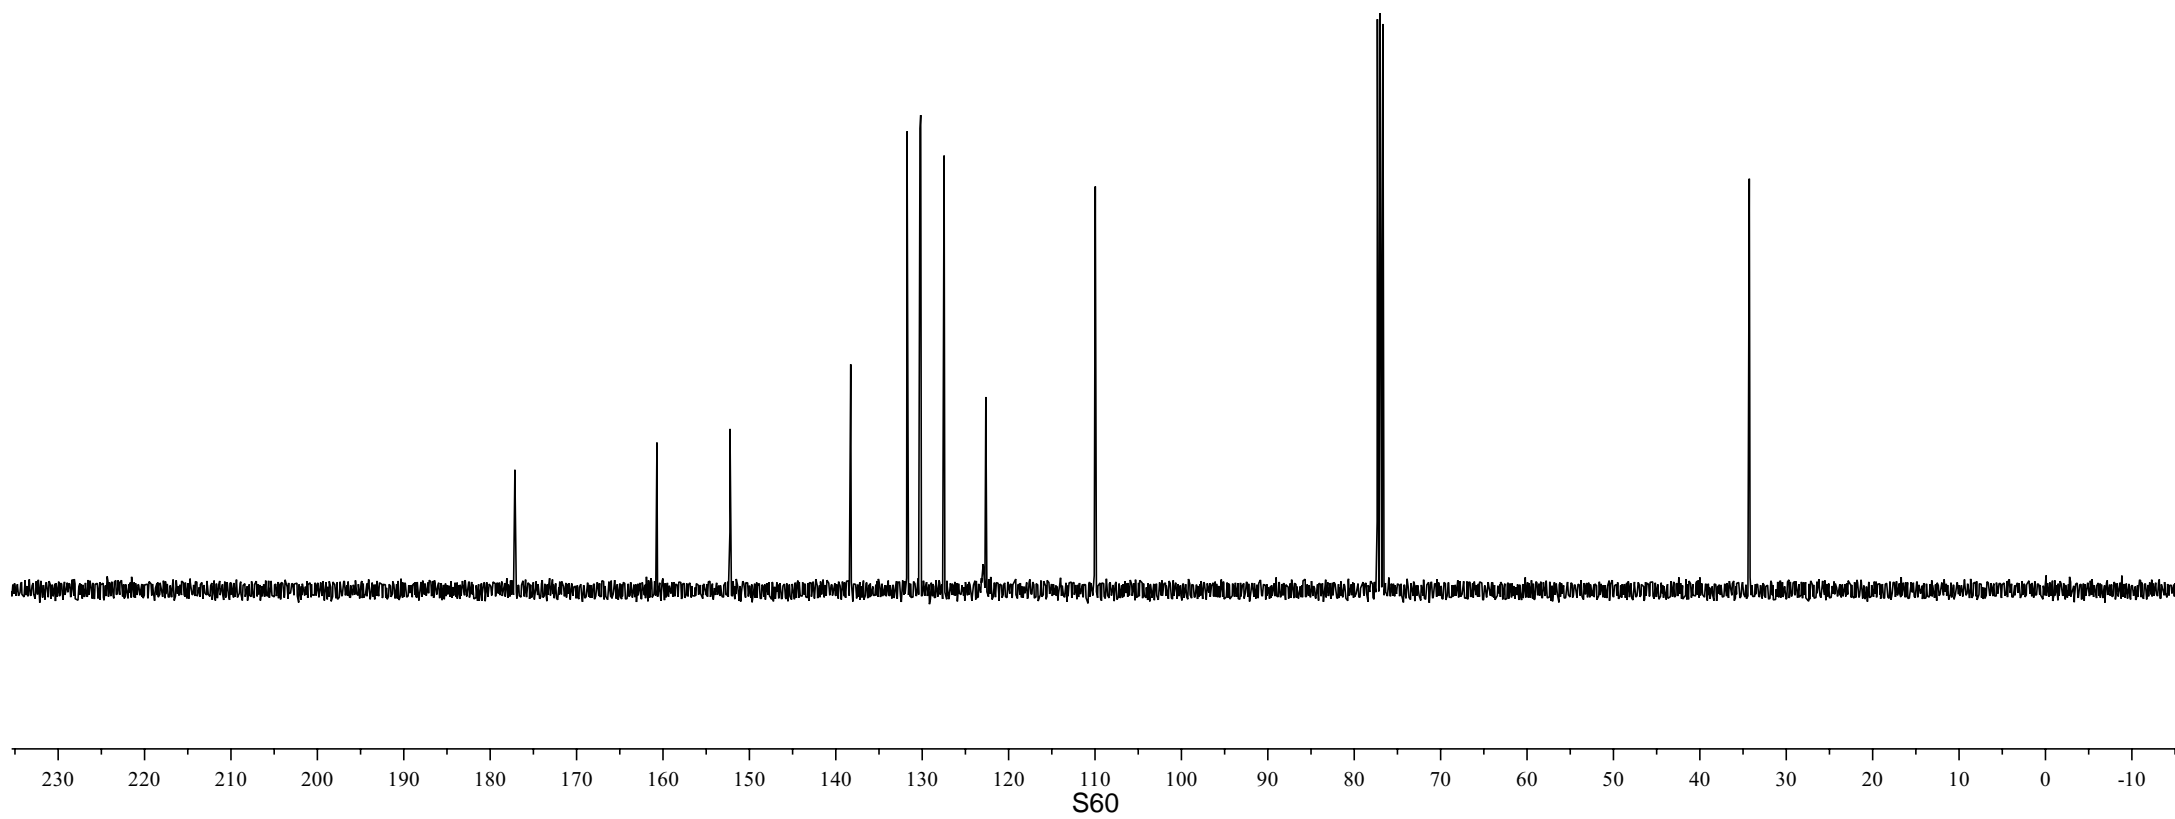

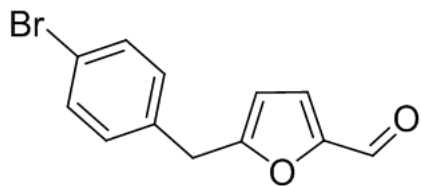

1j

9.524

7.441  
7.436  
7.424  
7.420  
7.169  
7.161  
7.132  
7.111

6.205  
6.196

4.001

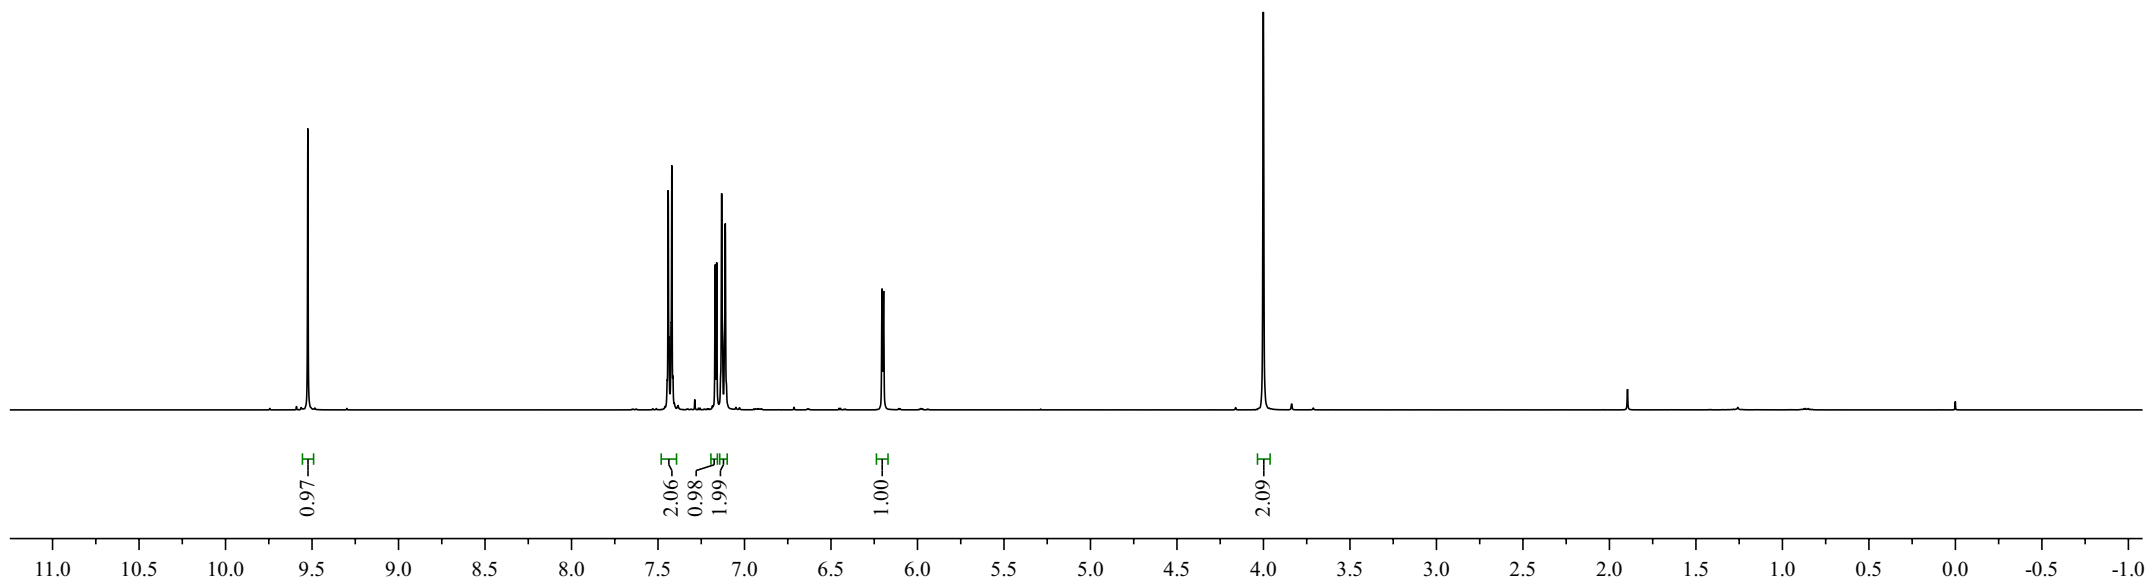

0.97

2.06

0.98

1.99

1.00

2.09

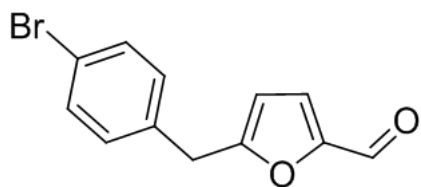

**1j**

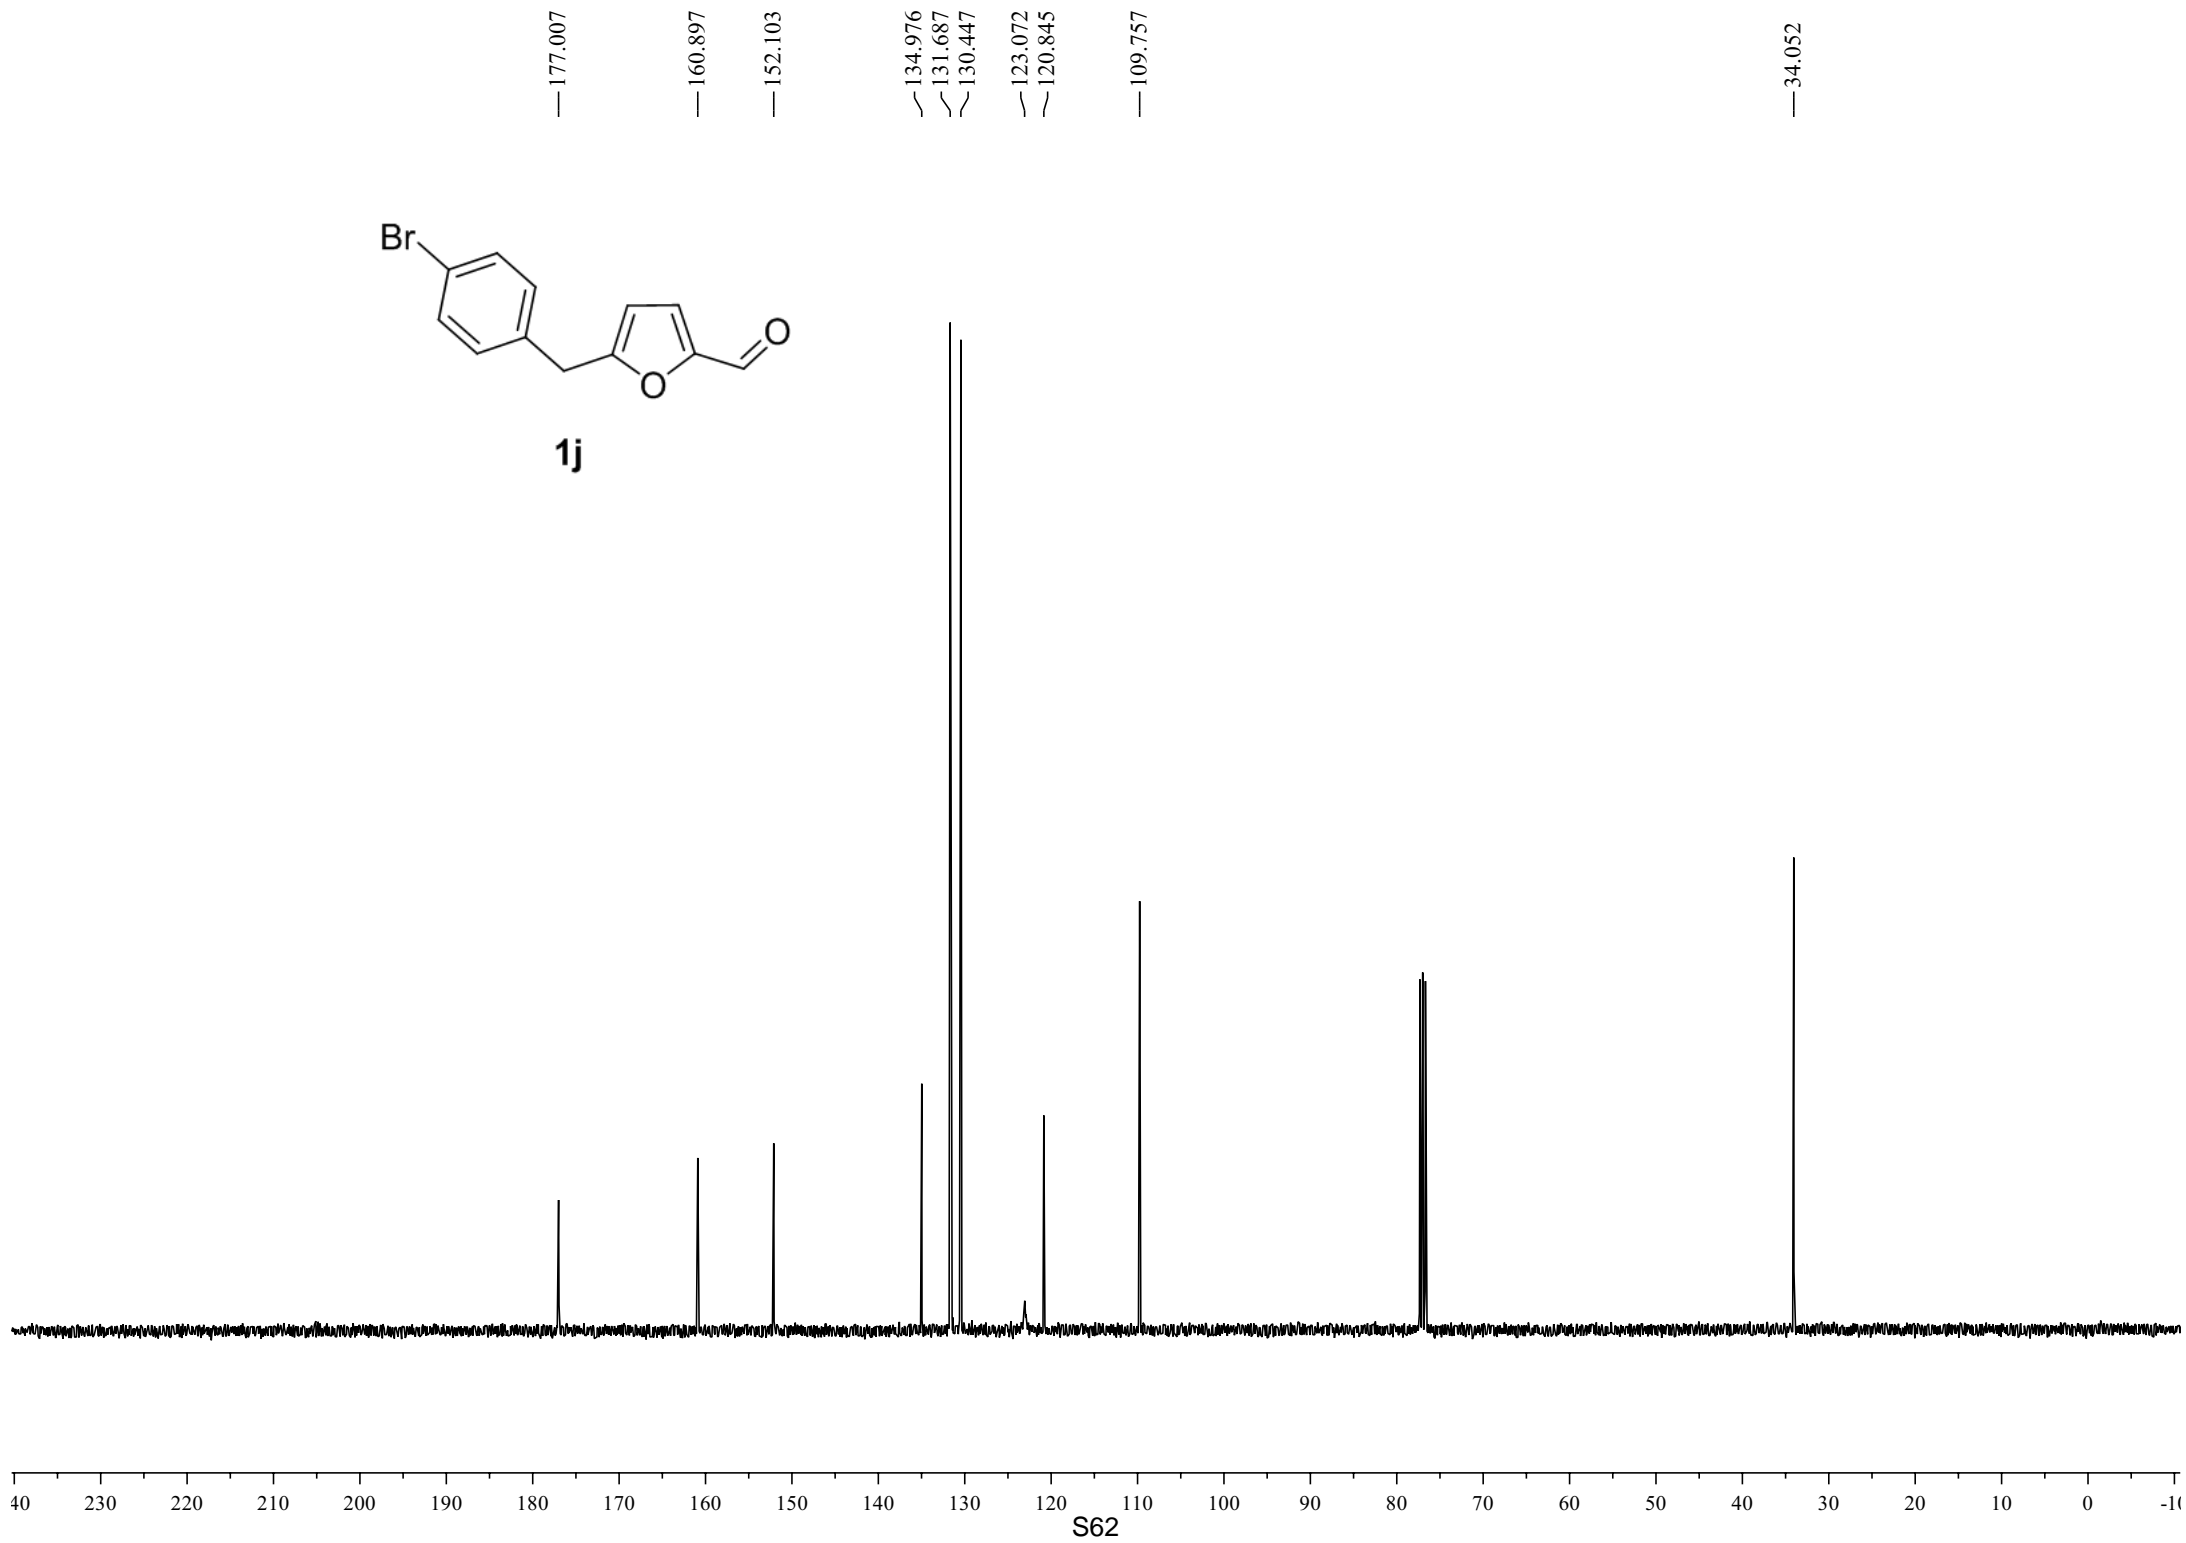

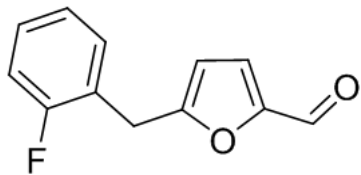

**1k**

9.543  
7.296  
7.287  
7.282  
7.276  
7.267  
7.257  
7.244  
7.238  
7.176  
7.167  
7.133  
7.130  
7.114  
7.112  
7.096  
7.073  
6.952  
6.213

4.101

-0.000

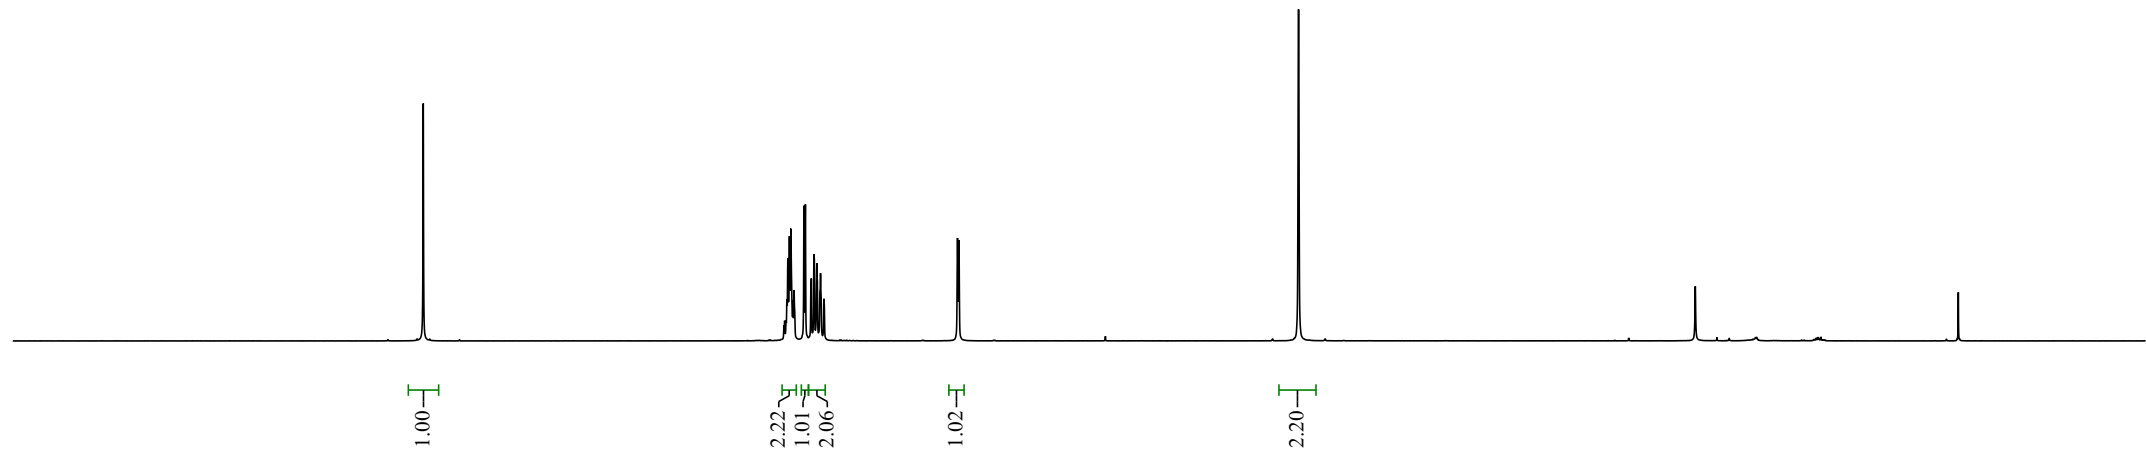

12.0 11.5 11.0 10.5 10.0 9.5 9.0 8.5 8.0 7.5 7.0 6.5 6.0 5.5 5.0 4.5 4.0 3.5 3.0 2.5 2.0 1.5 1.0 0.5 0.0 -0.5 -1.0

—177.179

162.024

160.446

159.575

—152.155

131.018

130.979

129.094

129.014

124.372

124.335

123.270

123.115

115.648

115.419

—109.835

—28.010

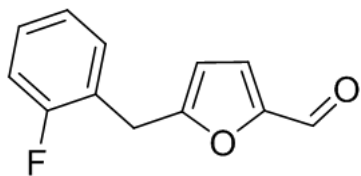

**1k**

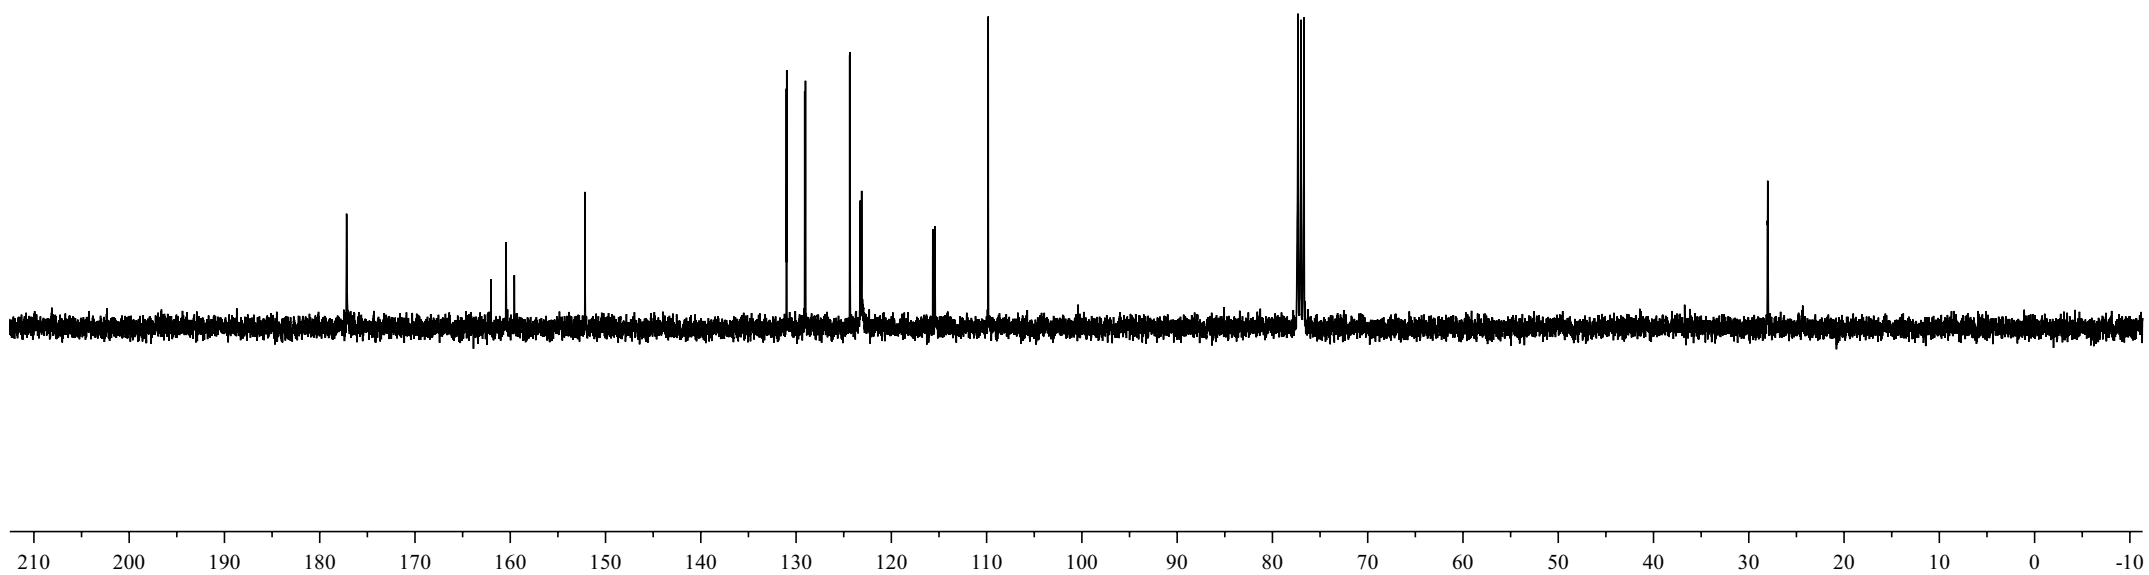





**1k**

—-117.776

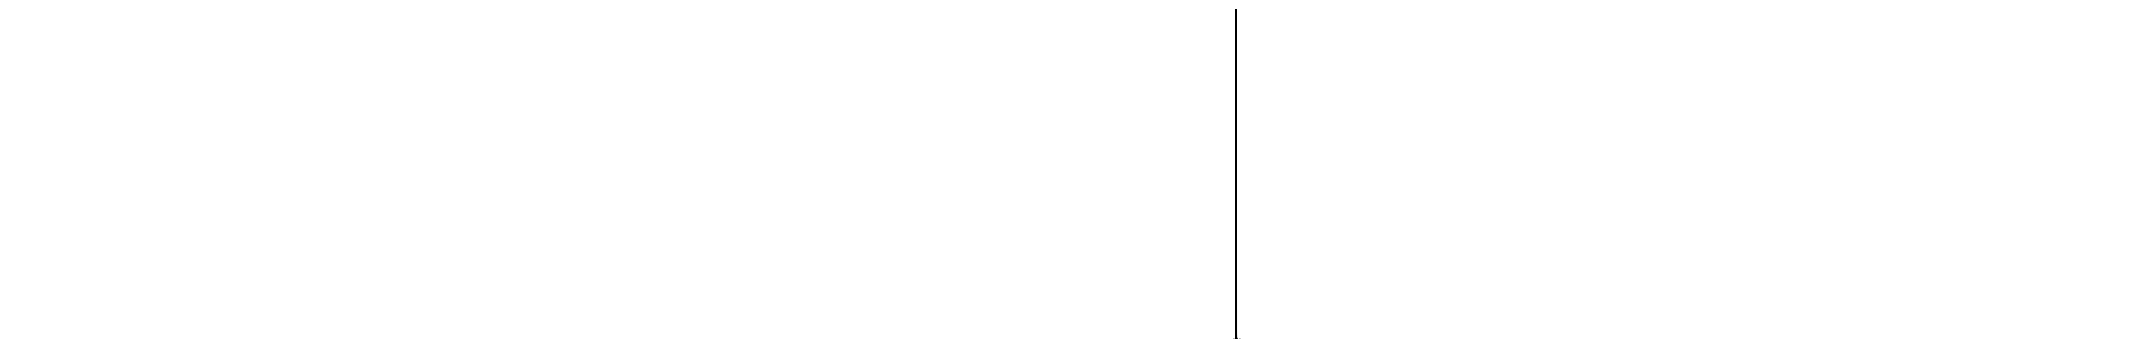

S65

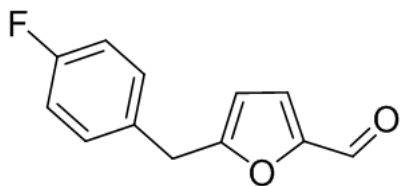

11

9.545  
7.265  
7.239  
7.225  
7.217  
7.204  
7.175  
7.167  
7.044  
7.023  
7.001  
6.184  
6.175  
4.039  
0.000

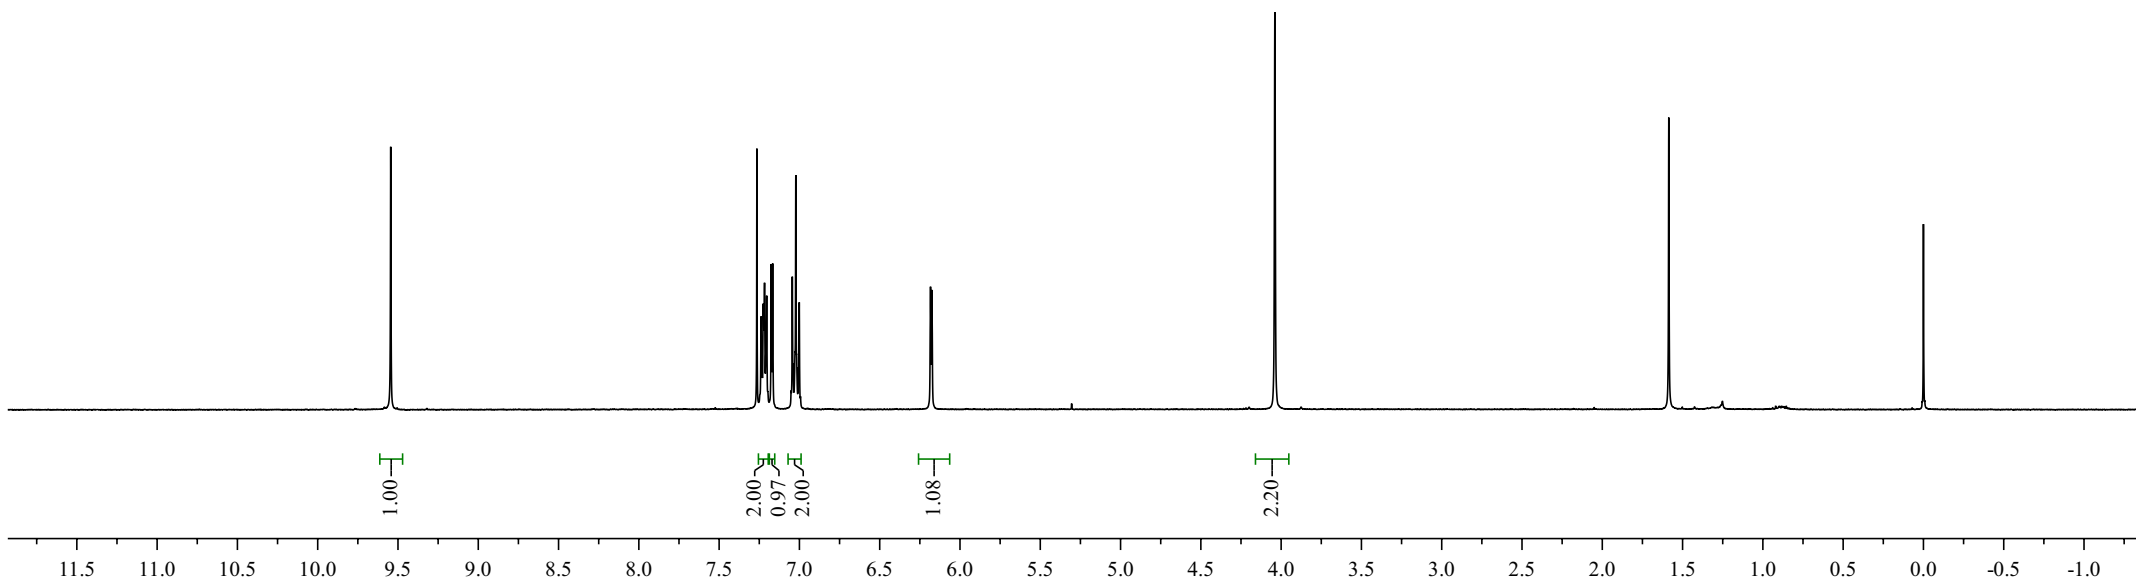

—177.100

—163.047

—161.565

—160.620

—152.194

—131.789

—130.371

—130.292

—123.140

—115.627

—115.443

—109.688

—33.951



**11**

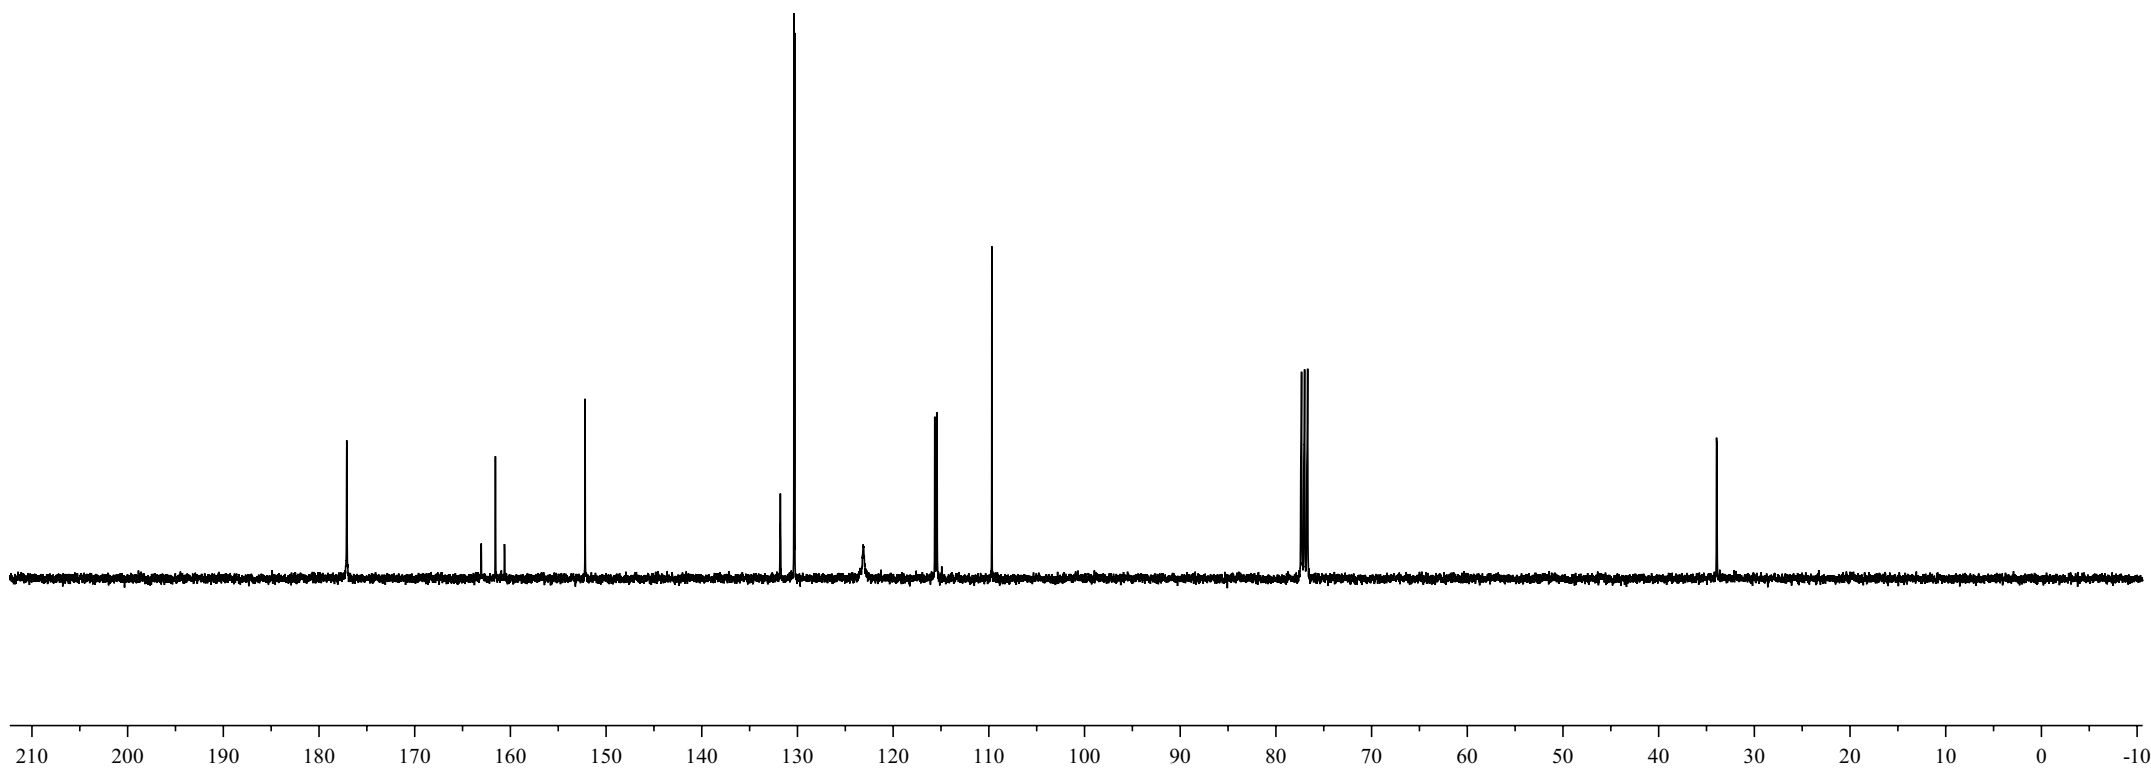



**11**

—115.660

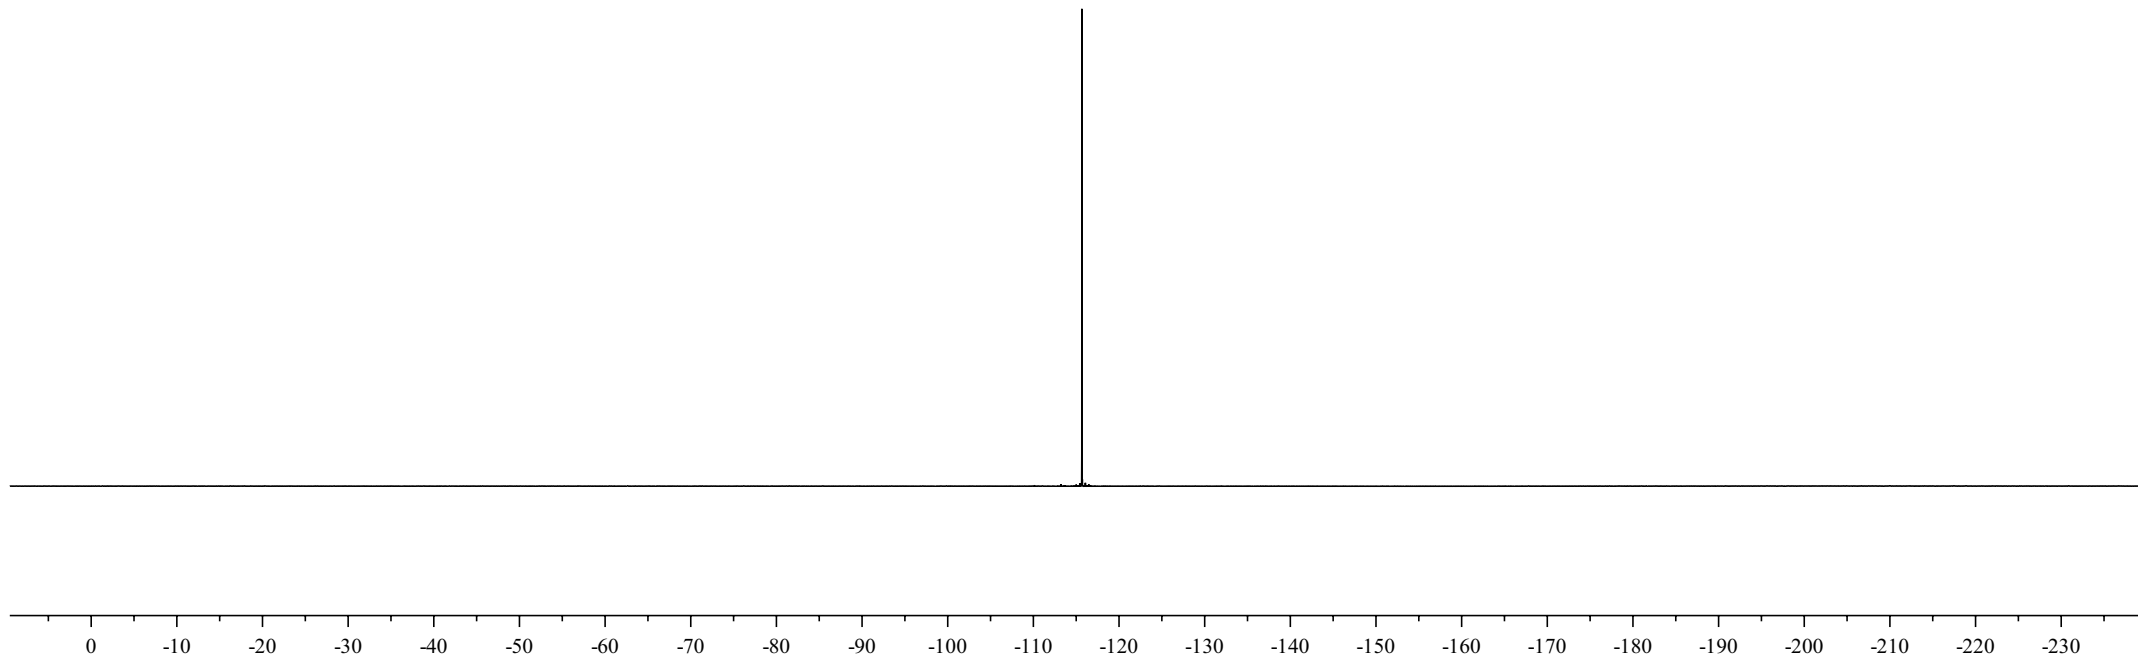

S68

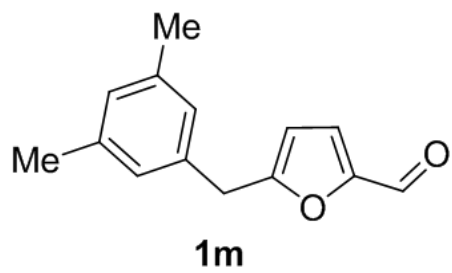

—9.540

7.176  
7.167  
6.913  
6.881

6.217  
6.209

—3.986

—2.310

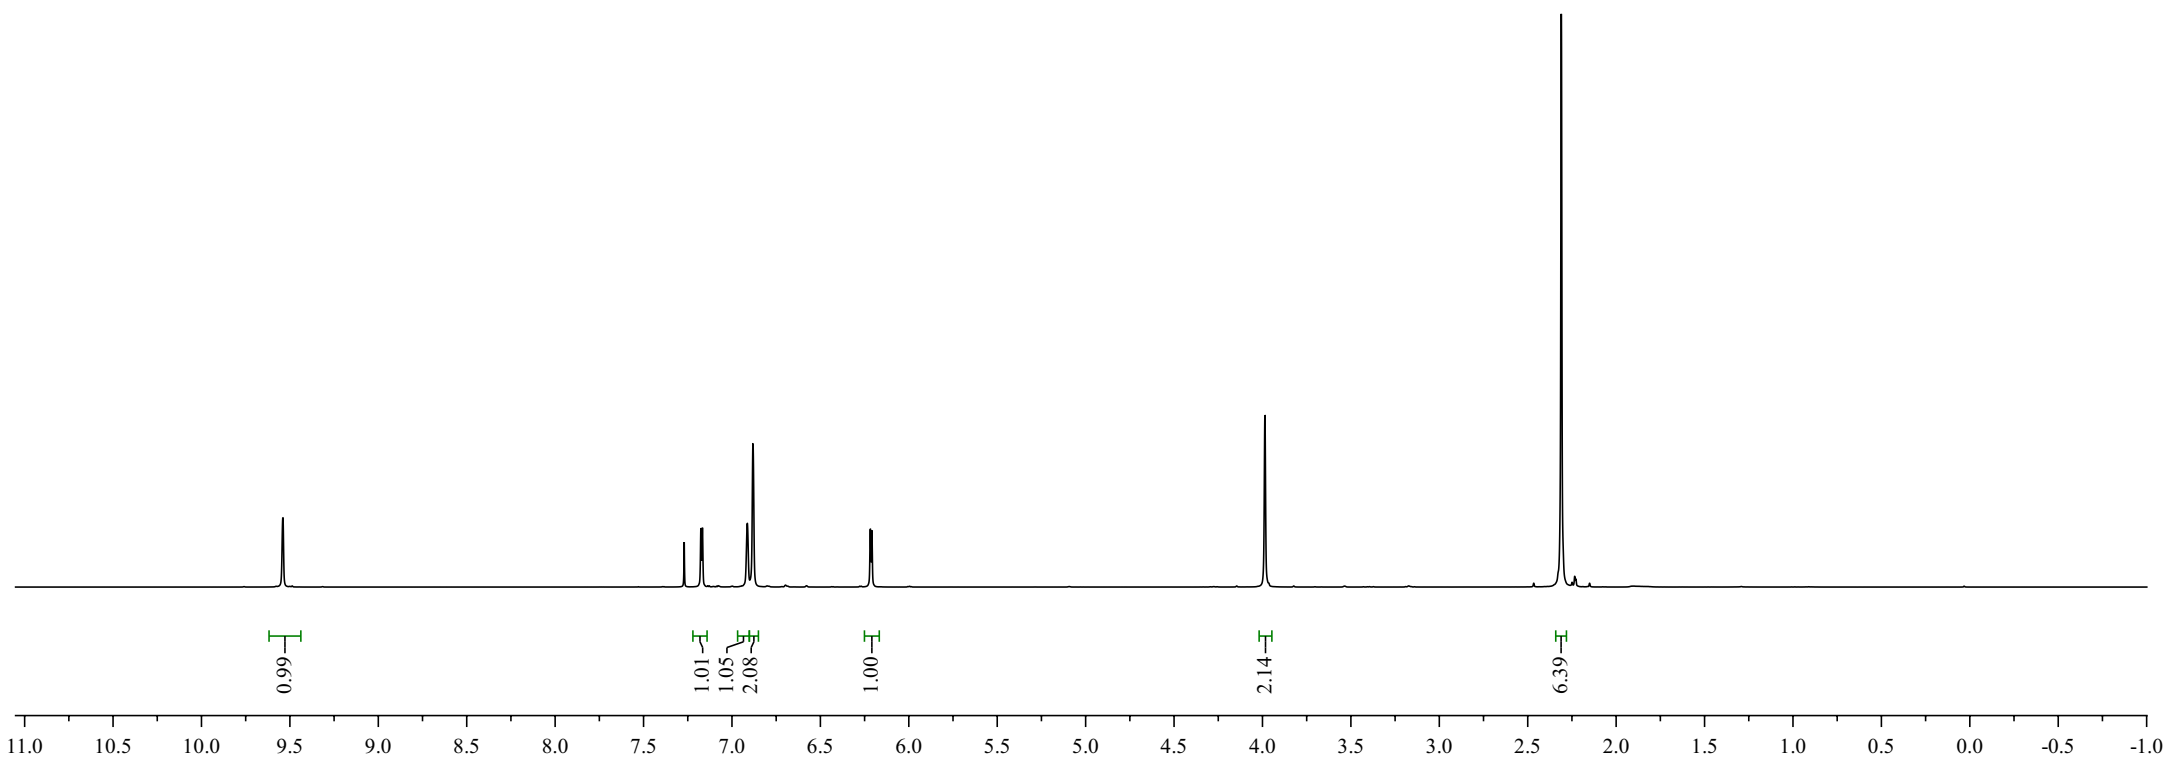



— 177.025

— 162.197

— 152.003

— 138.143

— 135.832

— 128.524

— 126.531

— 123.022

— 109.546

— 34.545

— 21.058

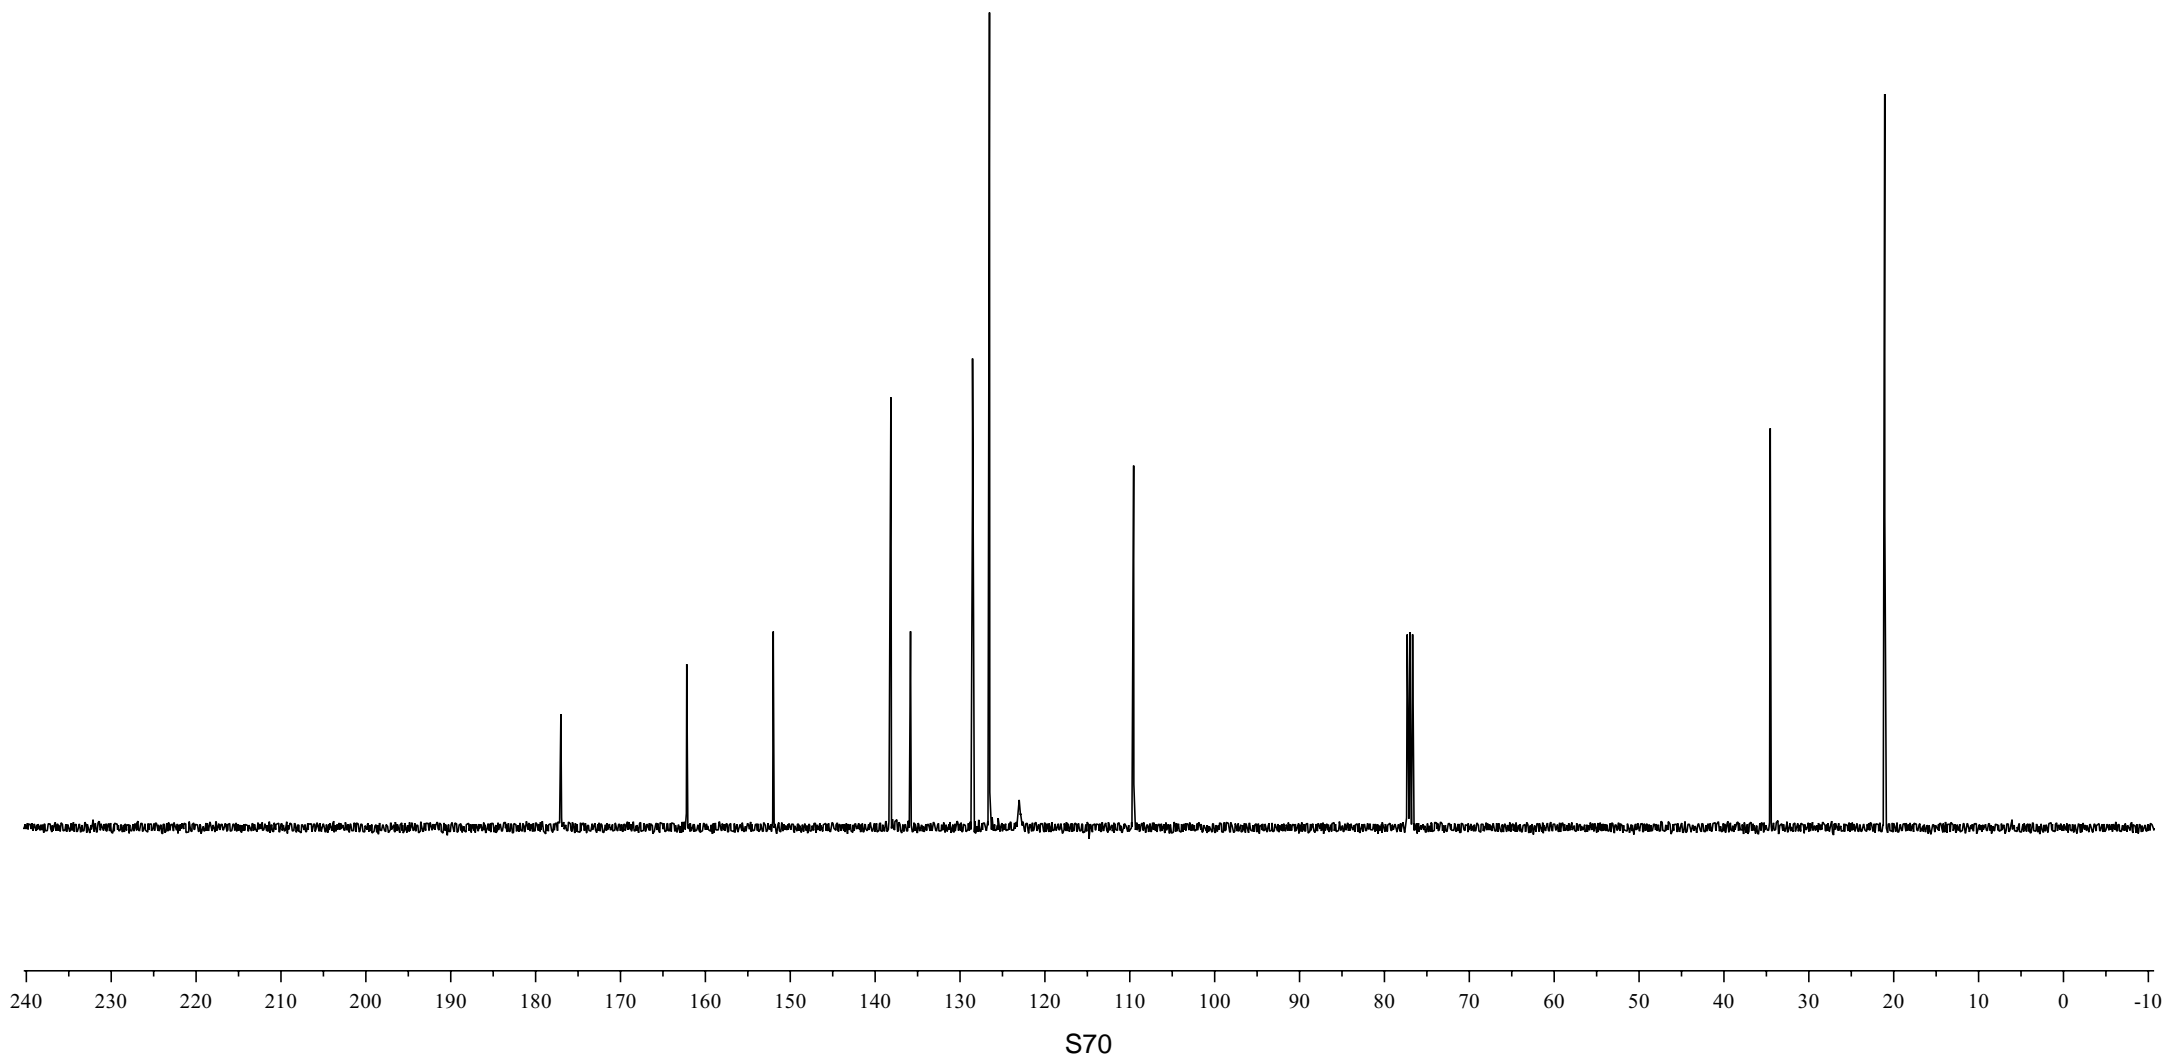

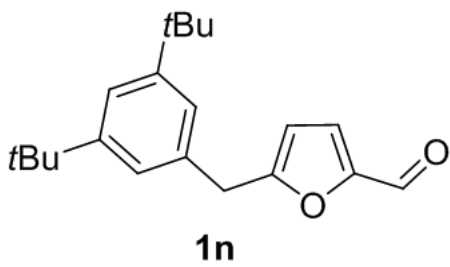

—9.547

7.330  
7.167  
7.159  
7.090  
7.088

6.188  
6.179

—4.050

—1.311

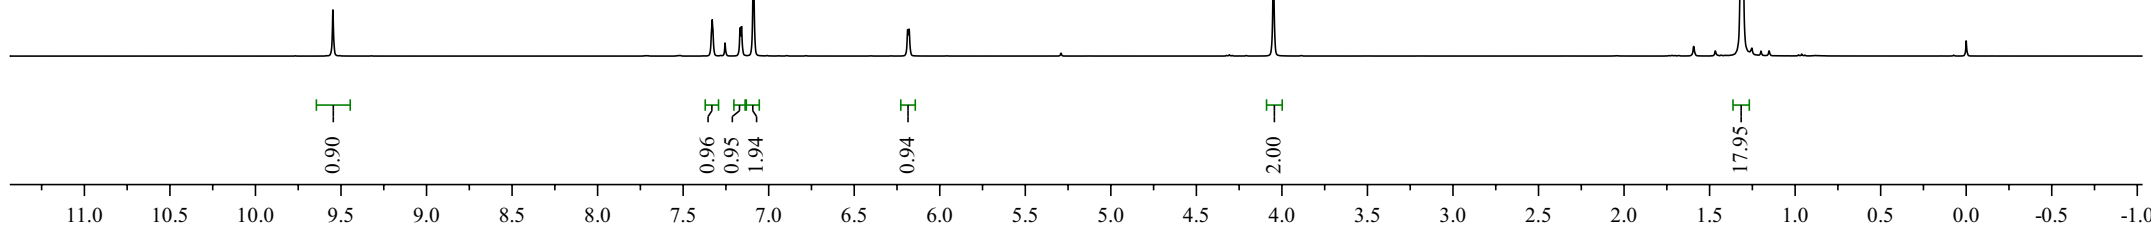

—177.198

—162.685

—152.111

—151.228

—135.120

—123.110

—121.006

—109.683

—35.341

—34.806

—31.423

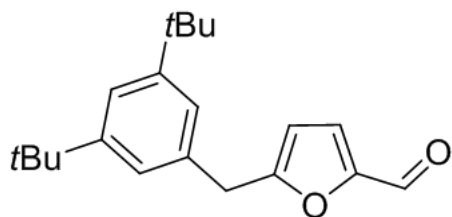

**1n**

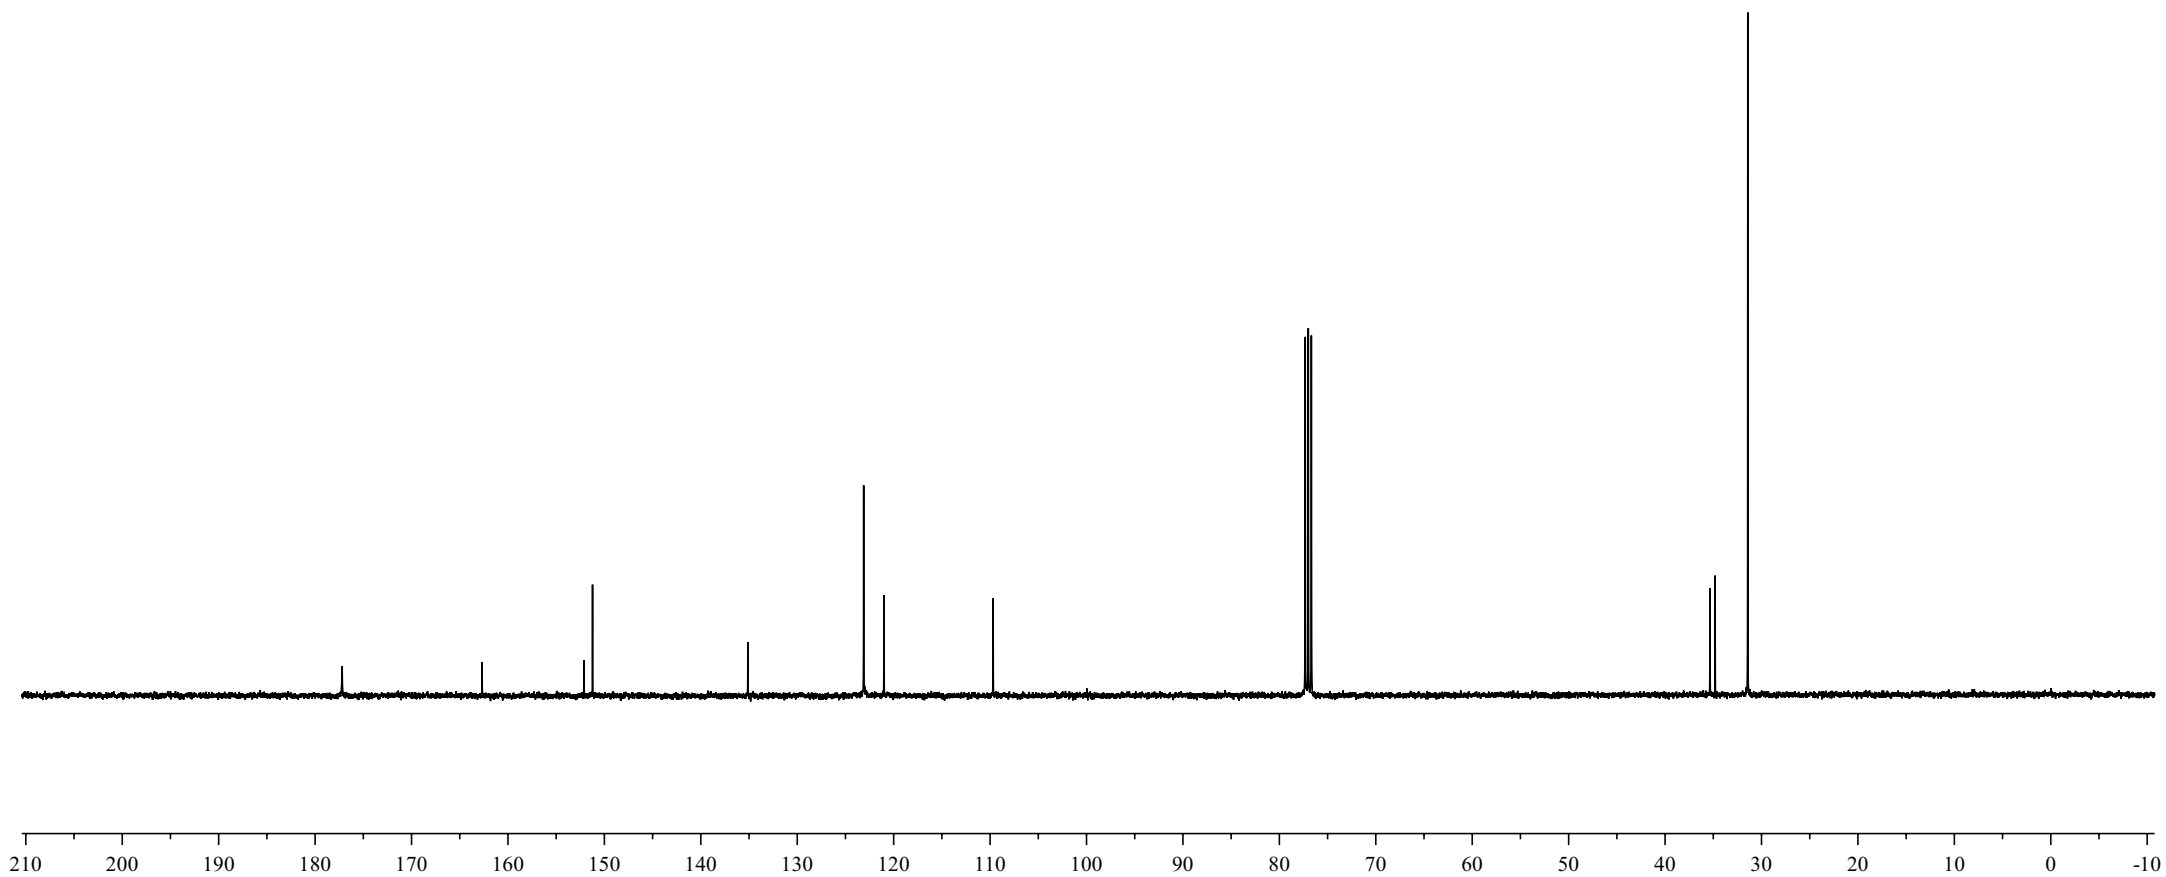



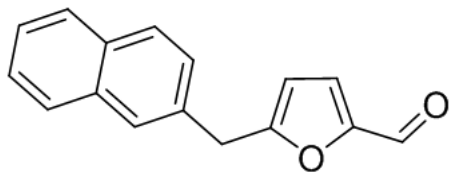

**1o**

9.504  
7.803  
7.788  
7.779  
7.768  
7.754  
7.664  
7.459  
7.453  
7.444  
7.434  
7.429  
7.343  
7.339  
7.322  
7.318  
7.116  
7.107  
6.160  
6.151

4.167

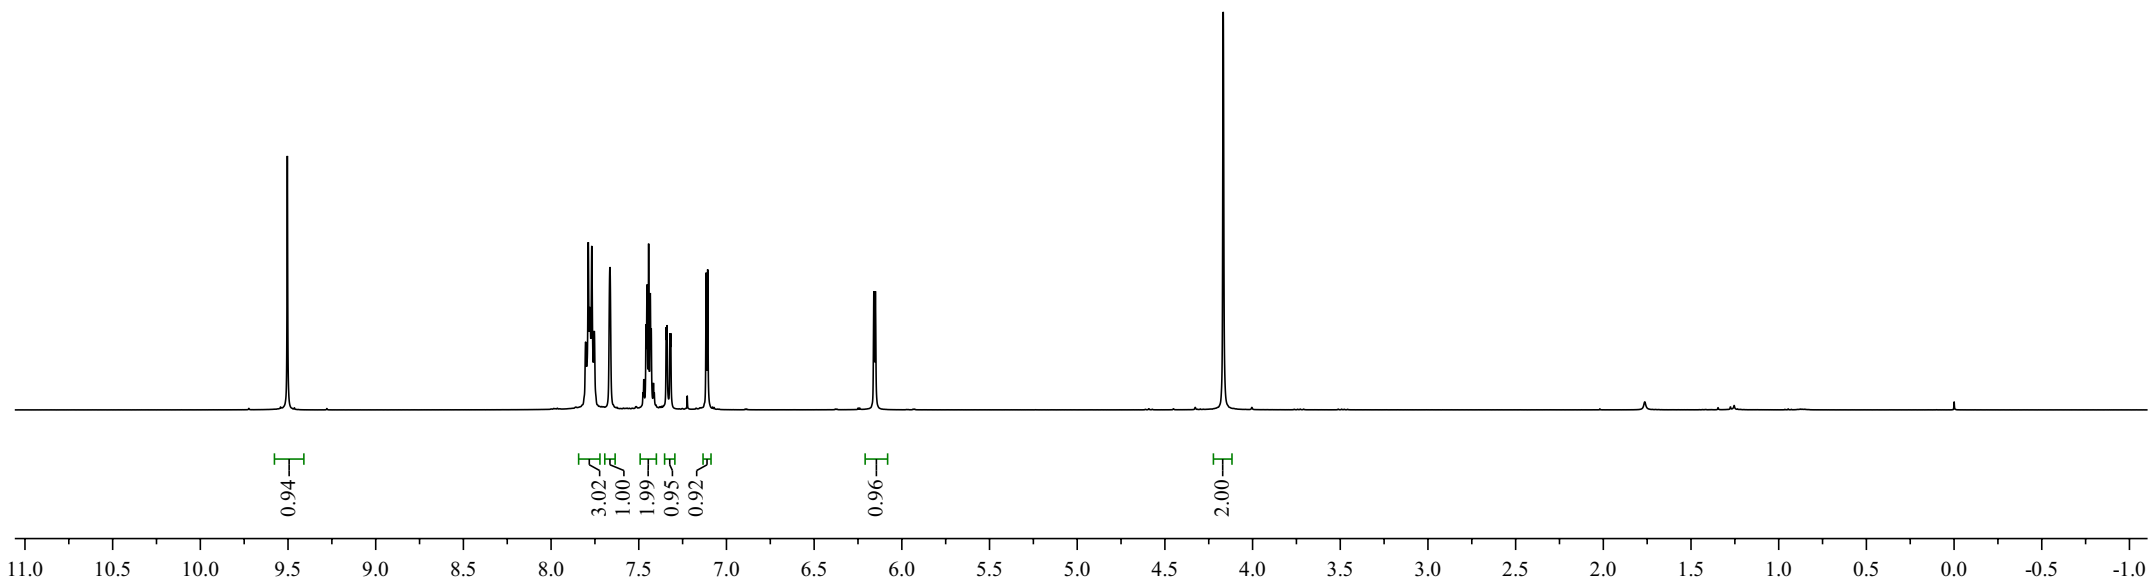

—177.090

—161.802

—152.093

133.427

133.390

132.303

128.394

127.561

127.492

127.417

126.870

126.190

125.779

123.130

—109.800

—34.888

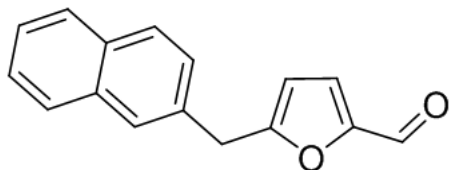

**1o**

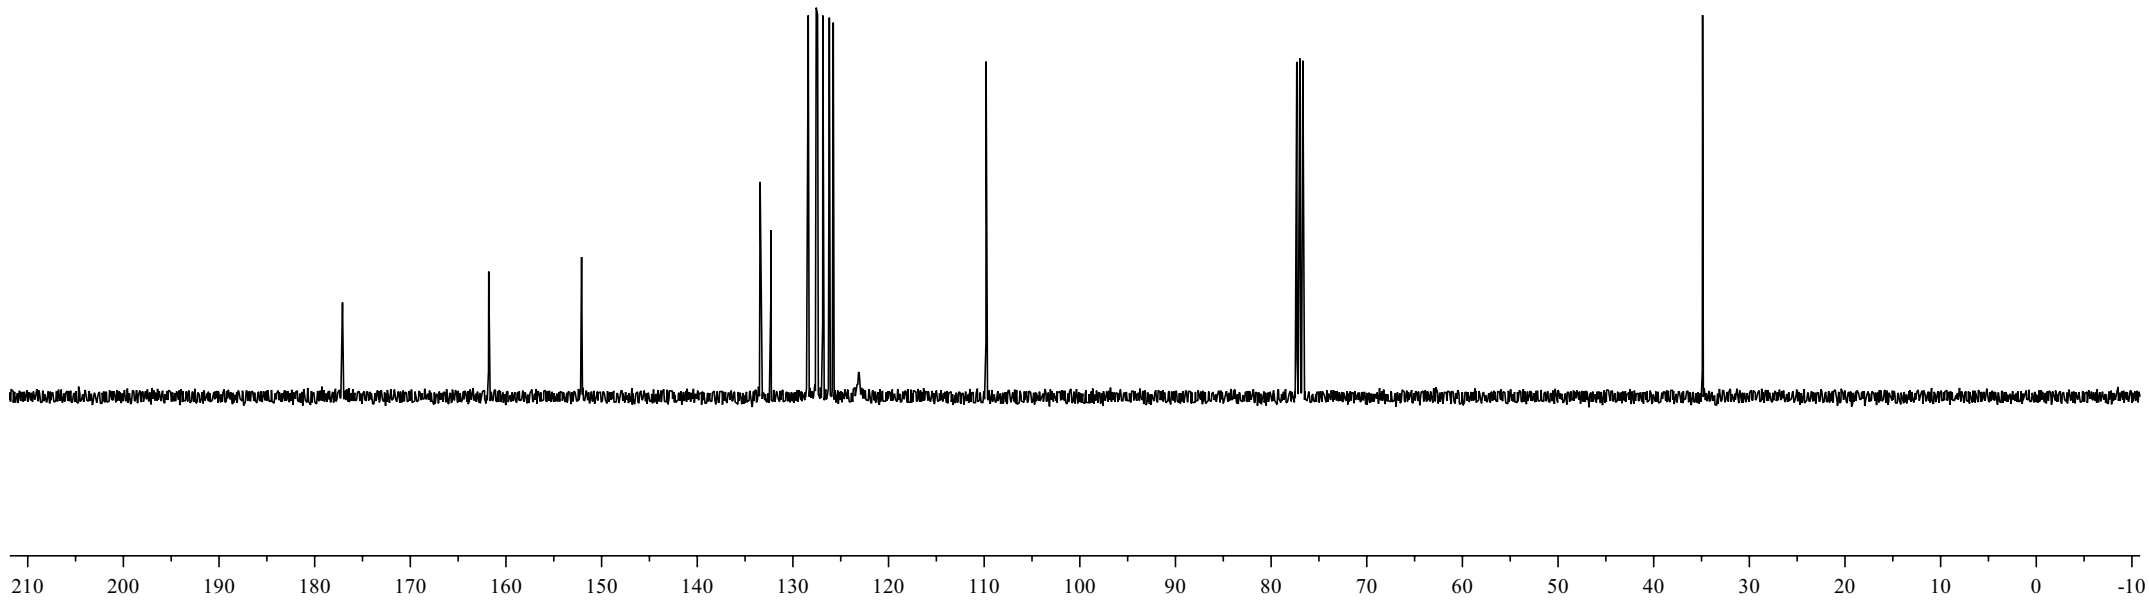

7.862  
7.822  
7.623  
7.619  
7.604  
7.600  
7.437  
7.435  
7.424  
7.419  
7.407  
7.399  
7.385  
7.377  
7.373  
7.333

4.403  
4.385  
4.367  
4.349

1.411  
1.393  
1.375

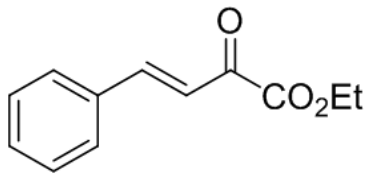

**2a**

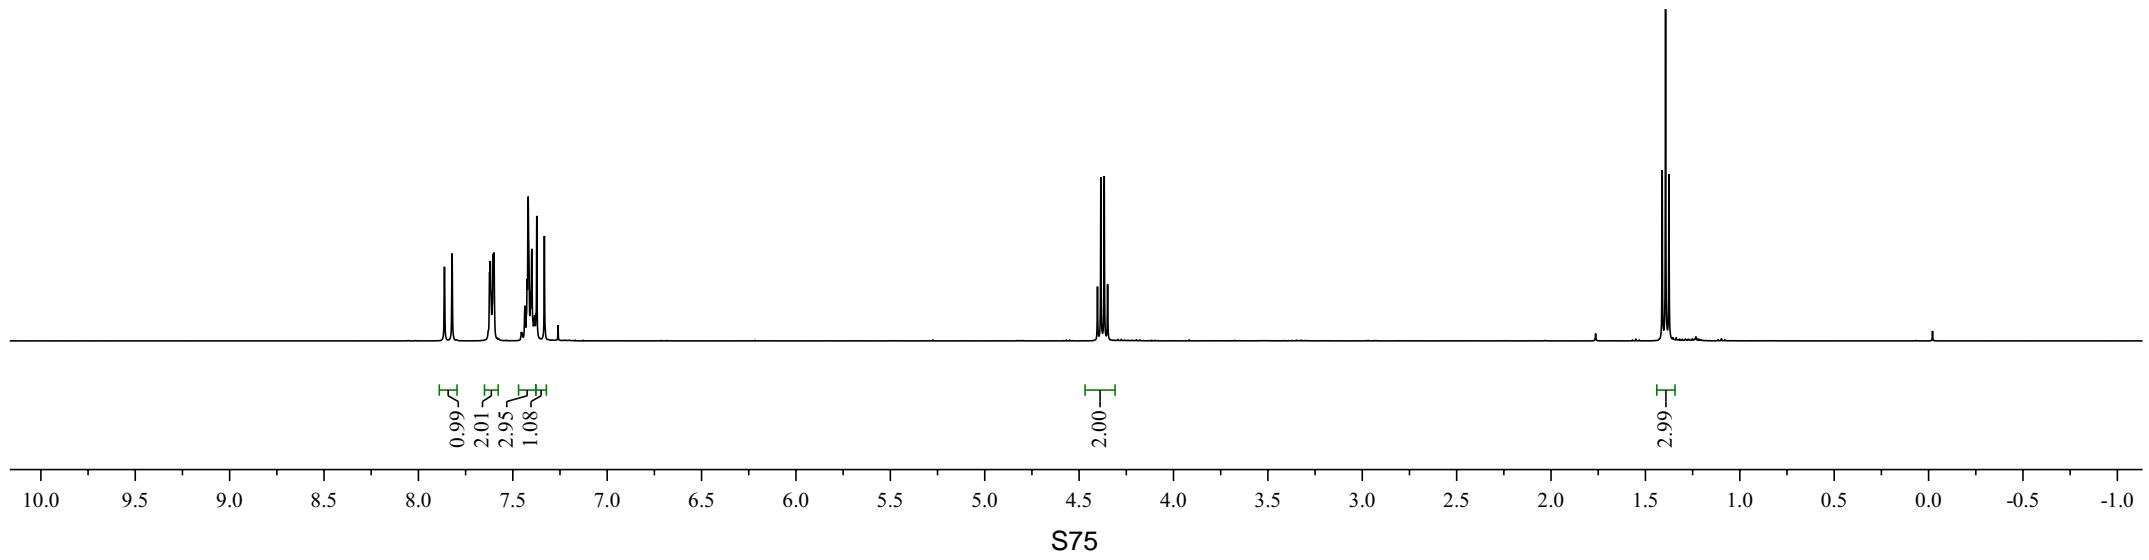

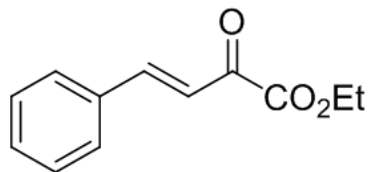

**2a**

—182.724

—162.069

—148.328

—133.872

—131.544

—128.982

—128.941

—120.381

—62.416

—13.967

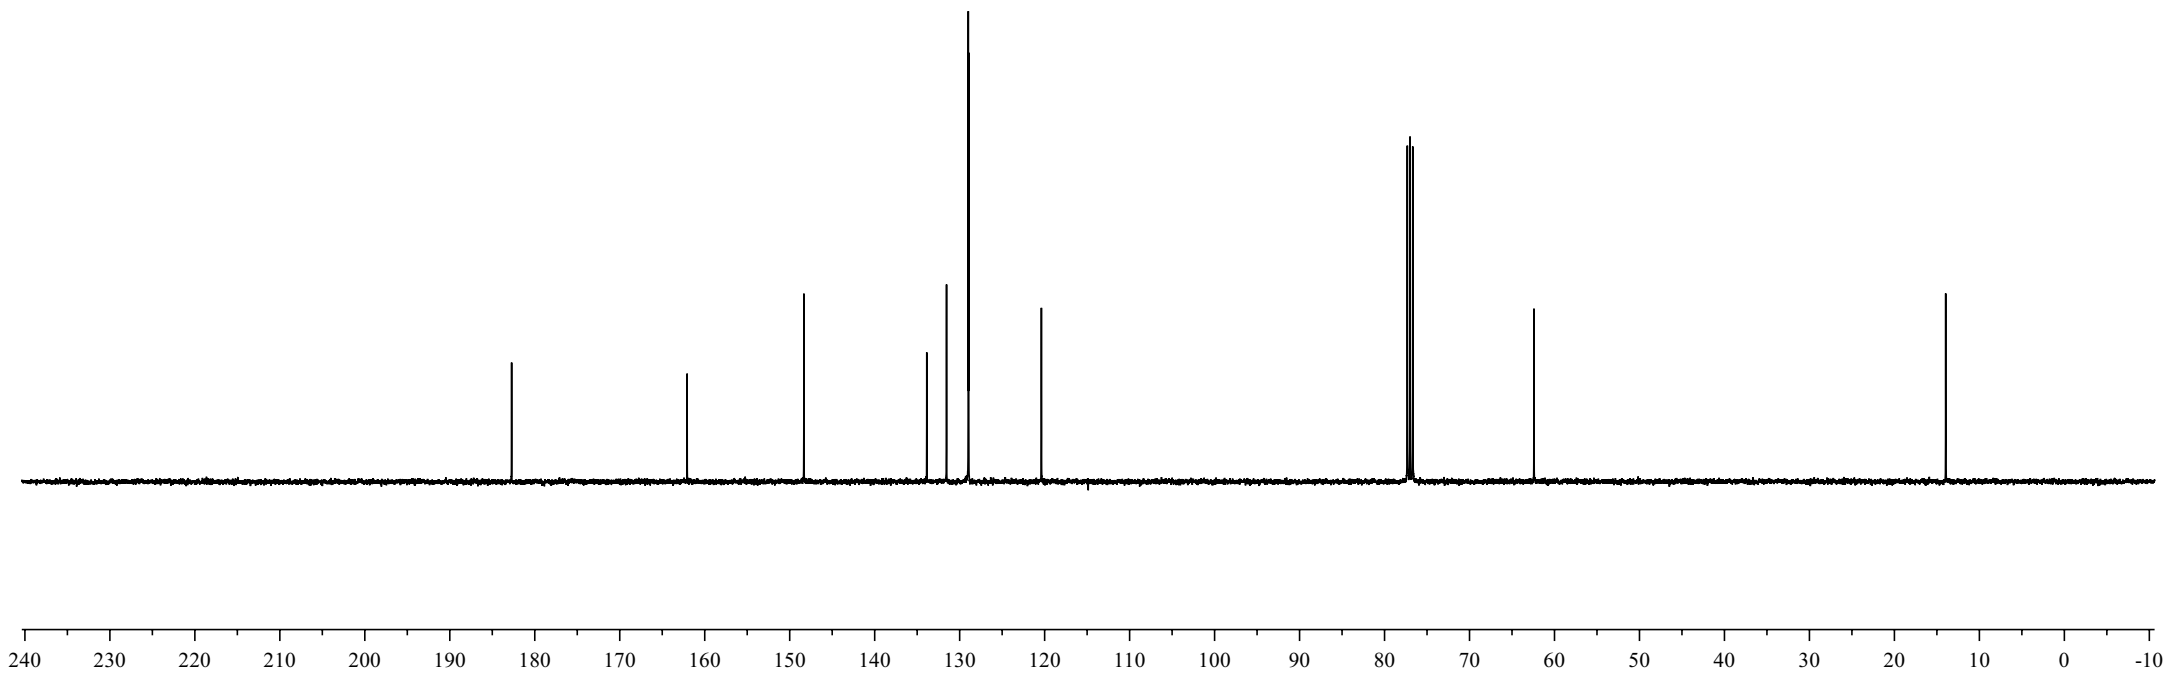

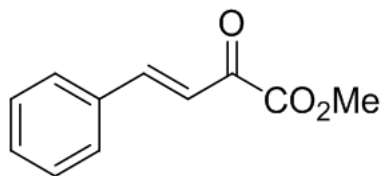

**2a'**

7.854  
7.813  
7.610  
7.607  
7.591  
7.587  
7.434  
7.421  
7.417  
7.412  
7.393  
7.370  
7.329

3.912

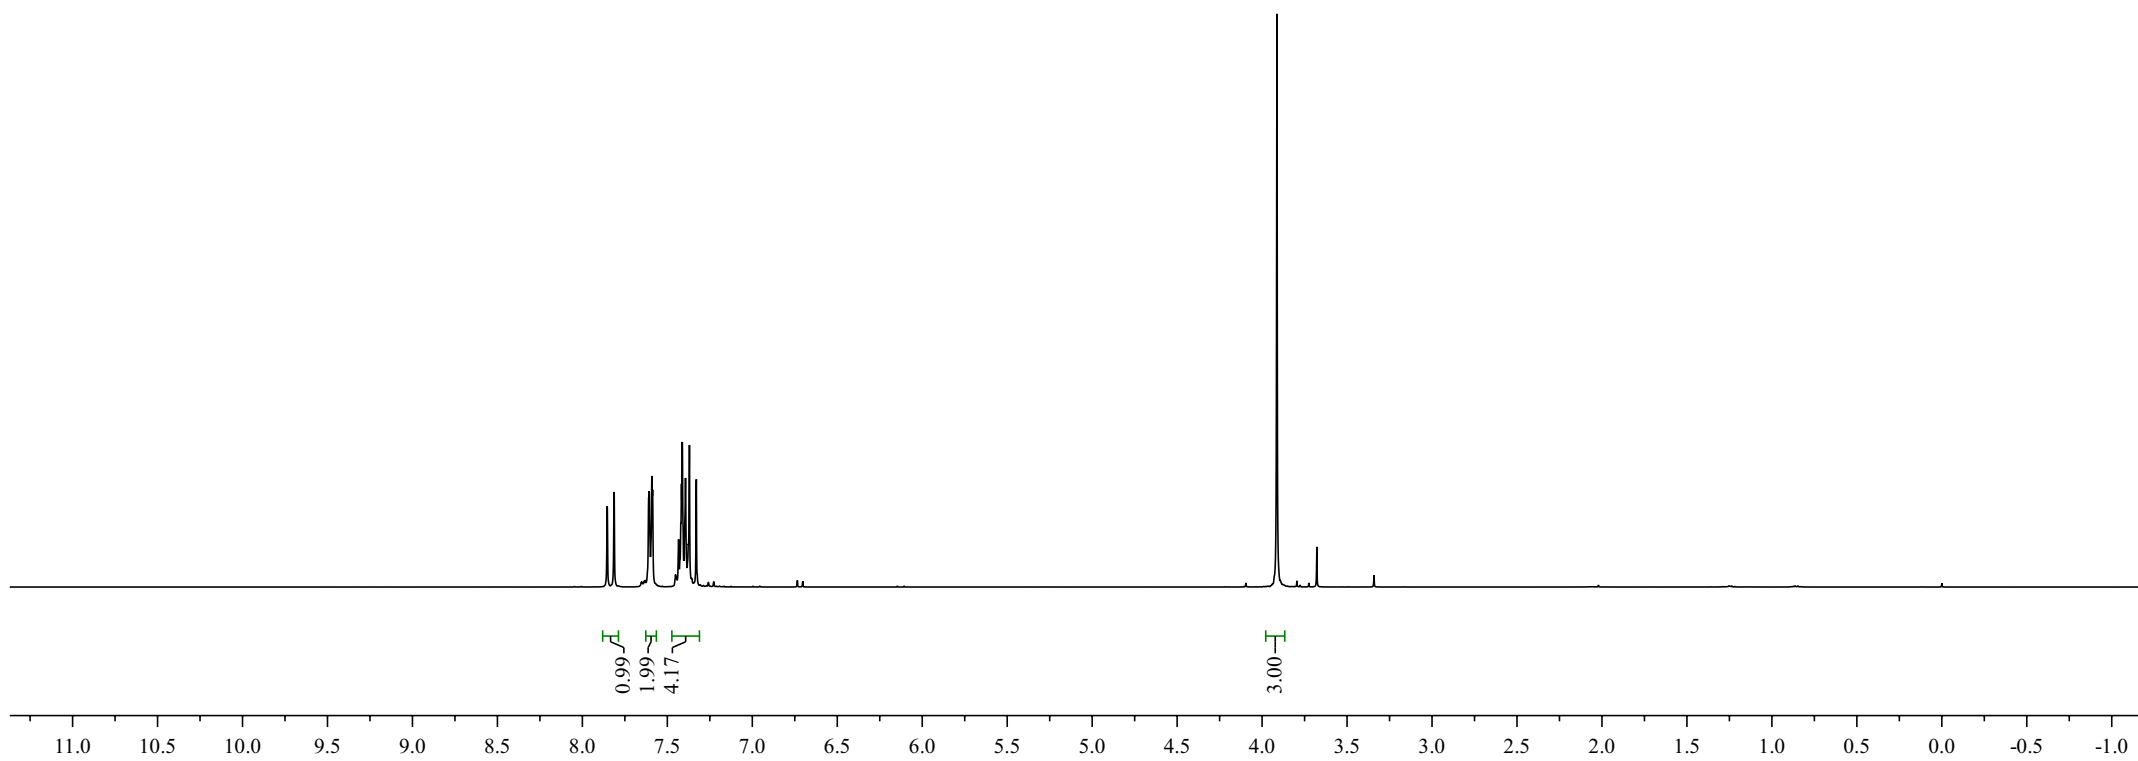



**2a'**

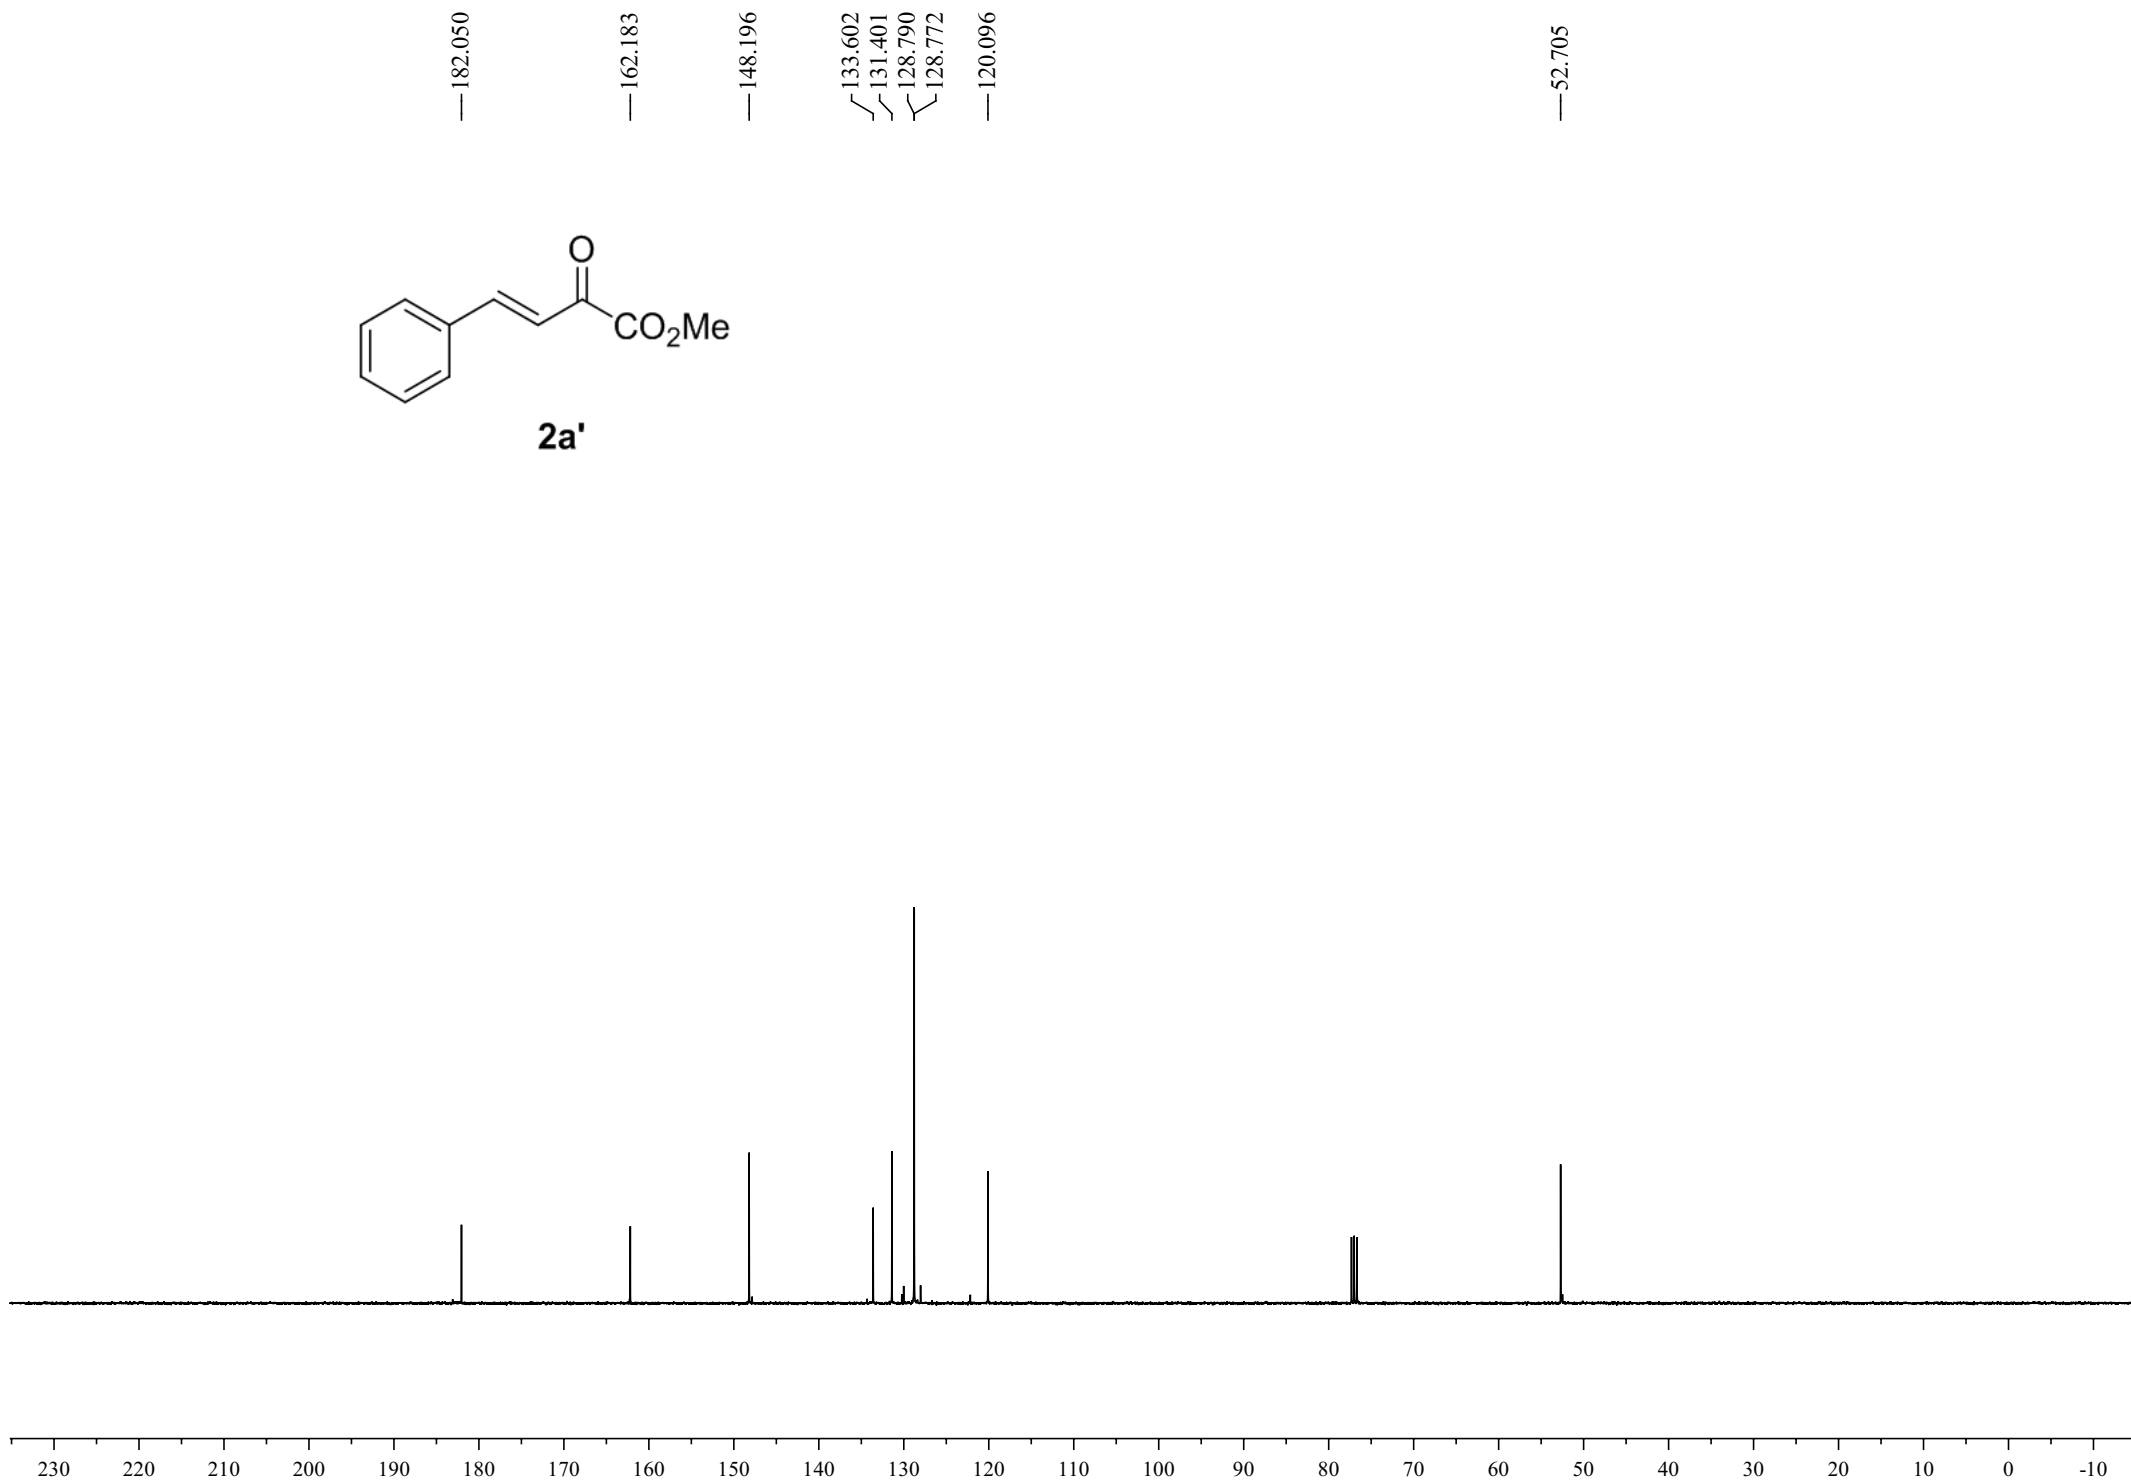

7.853  
7.813  
7.631  
7.627  
7.612  
7.607  
7.447  
7.445  
7.430  
7.420  
7.411  
7.366  
7.325

5.258  
5.242  
5.226  
5.210  
5.195

1.399  
1.384

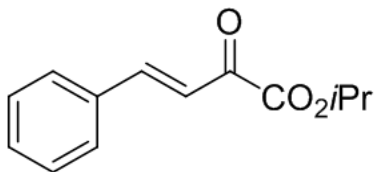

**2b**

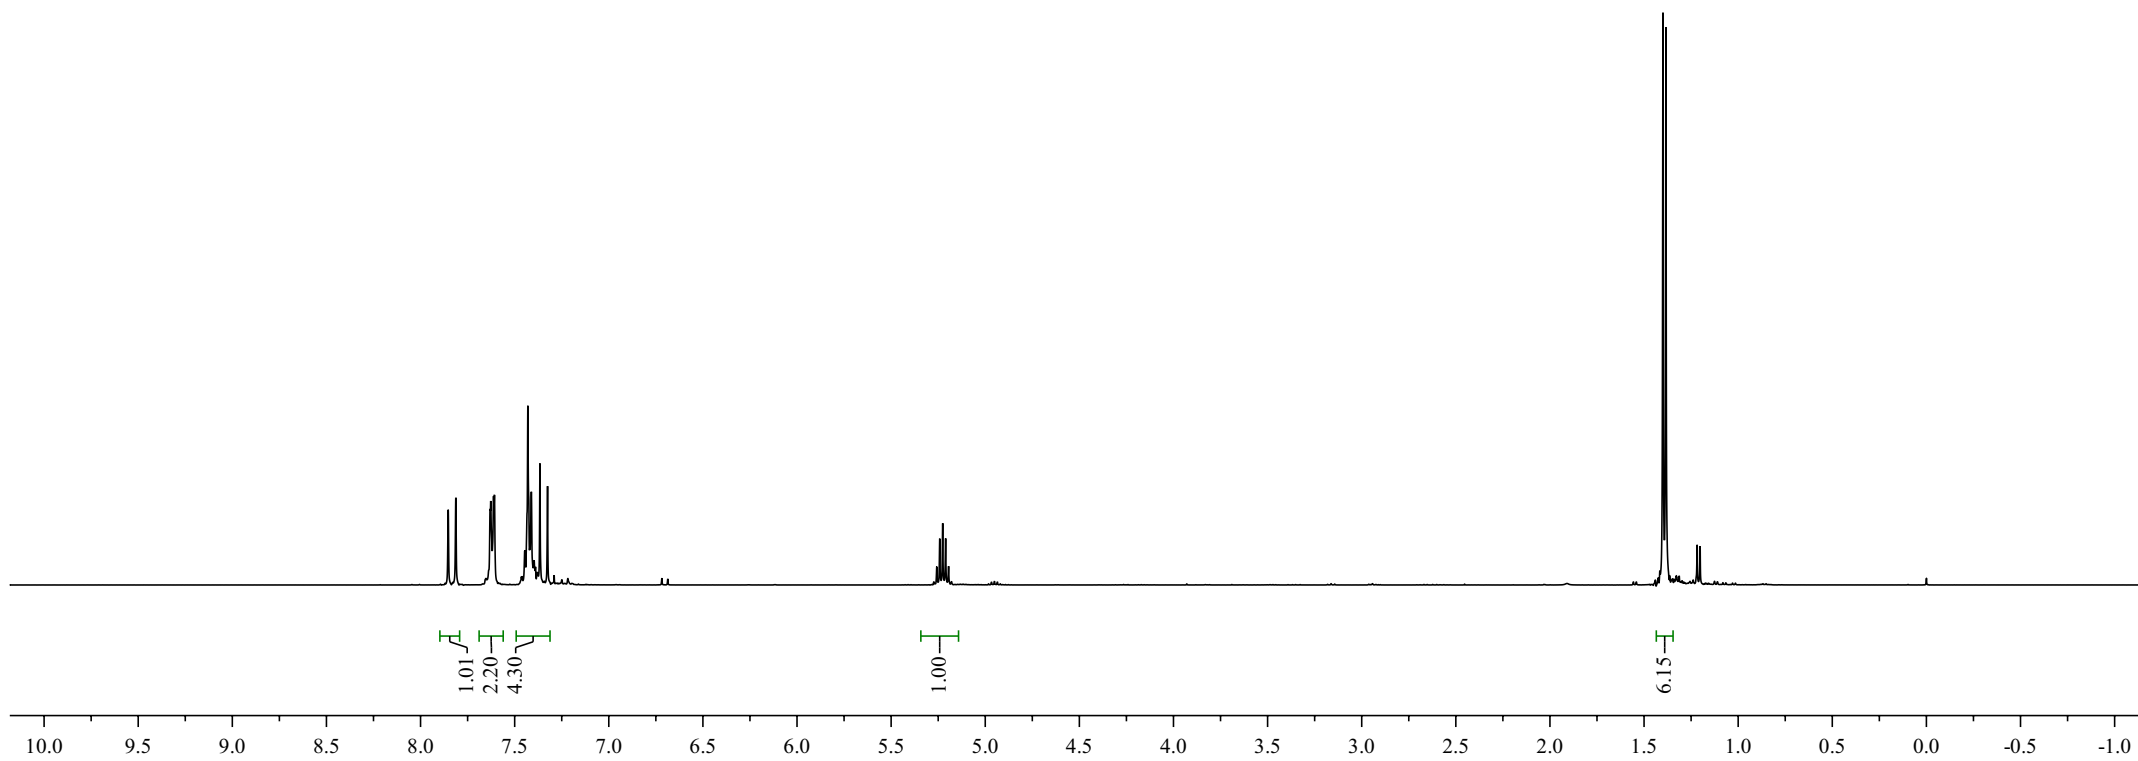

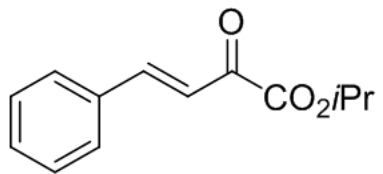

**2b**

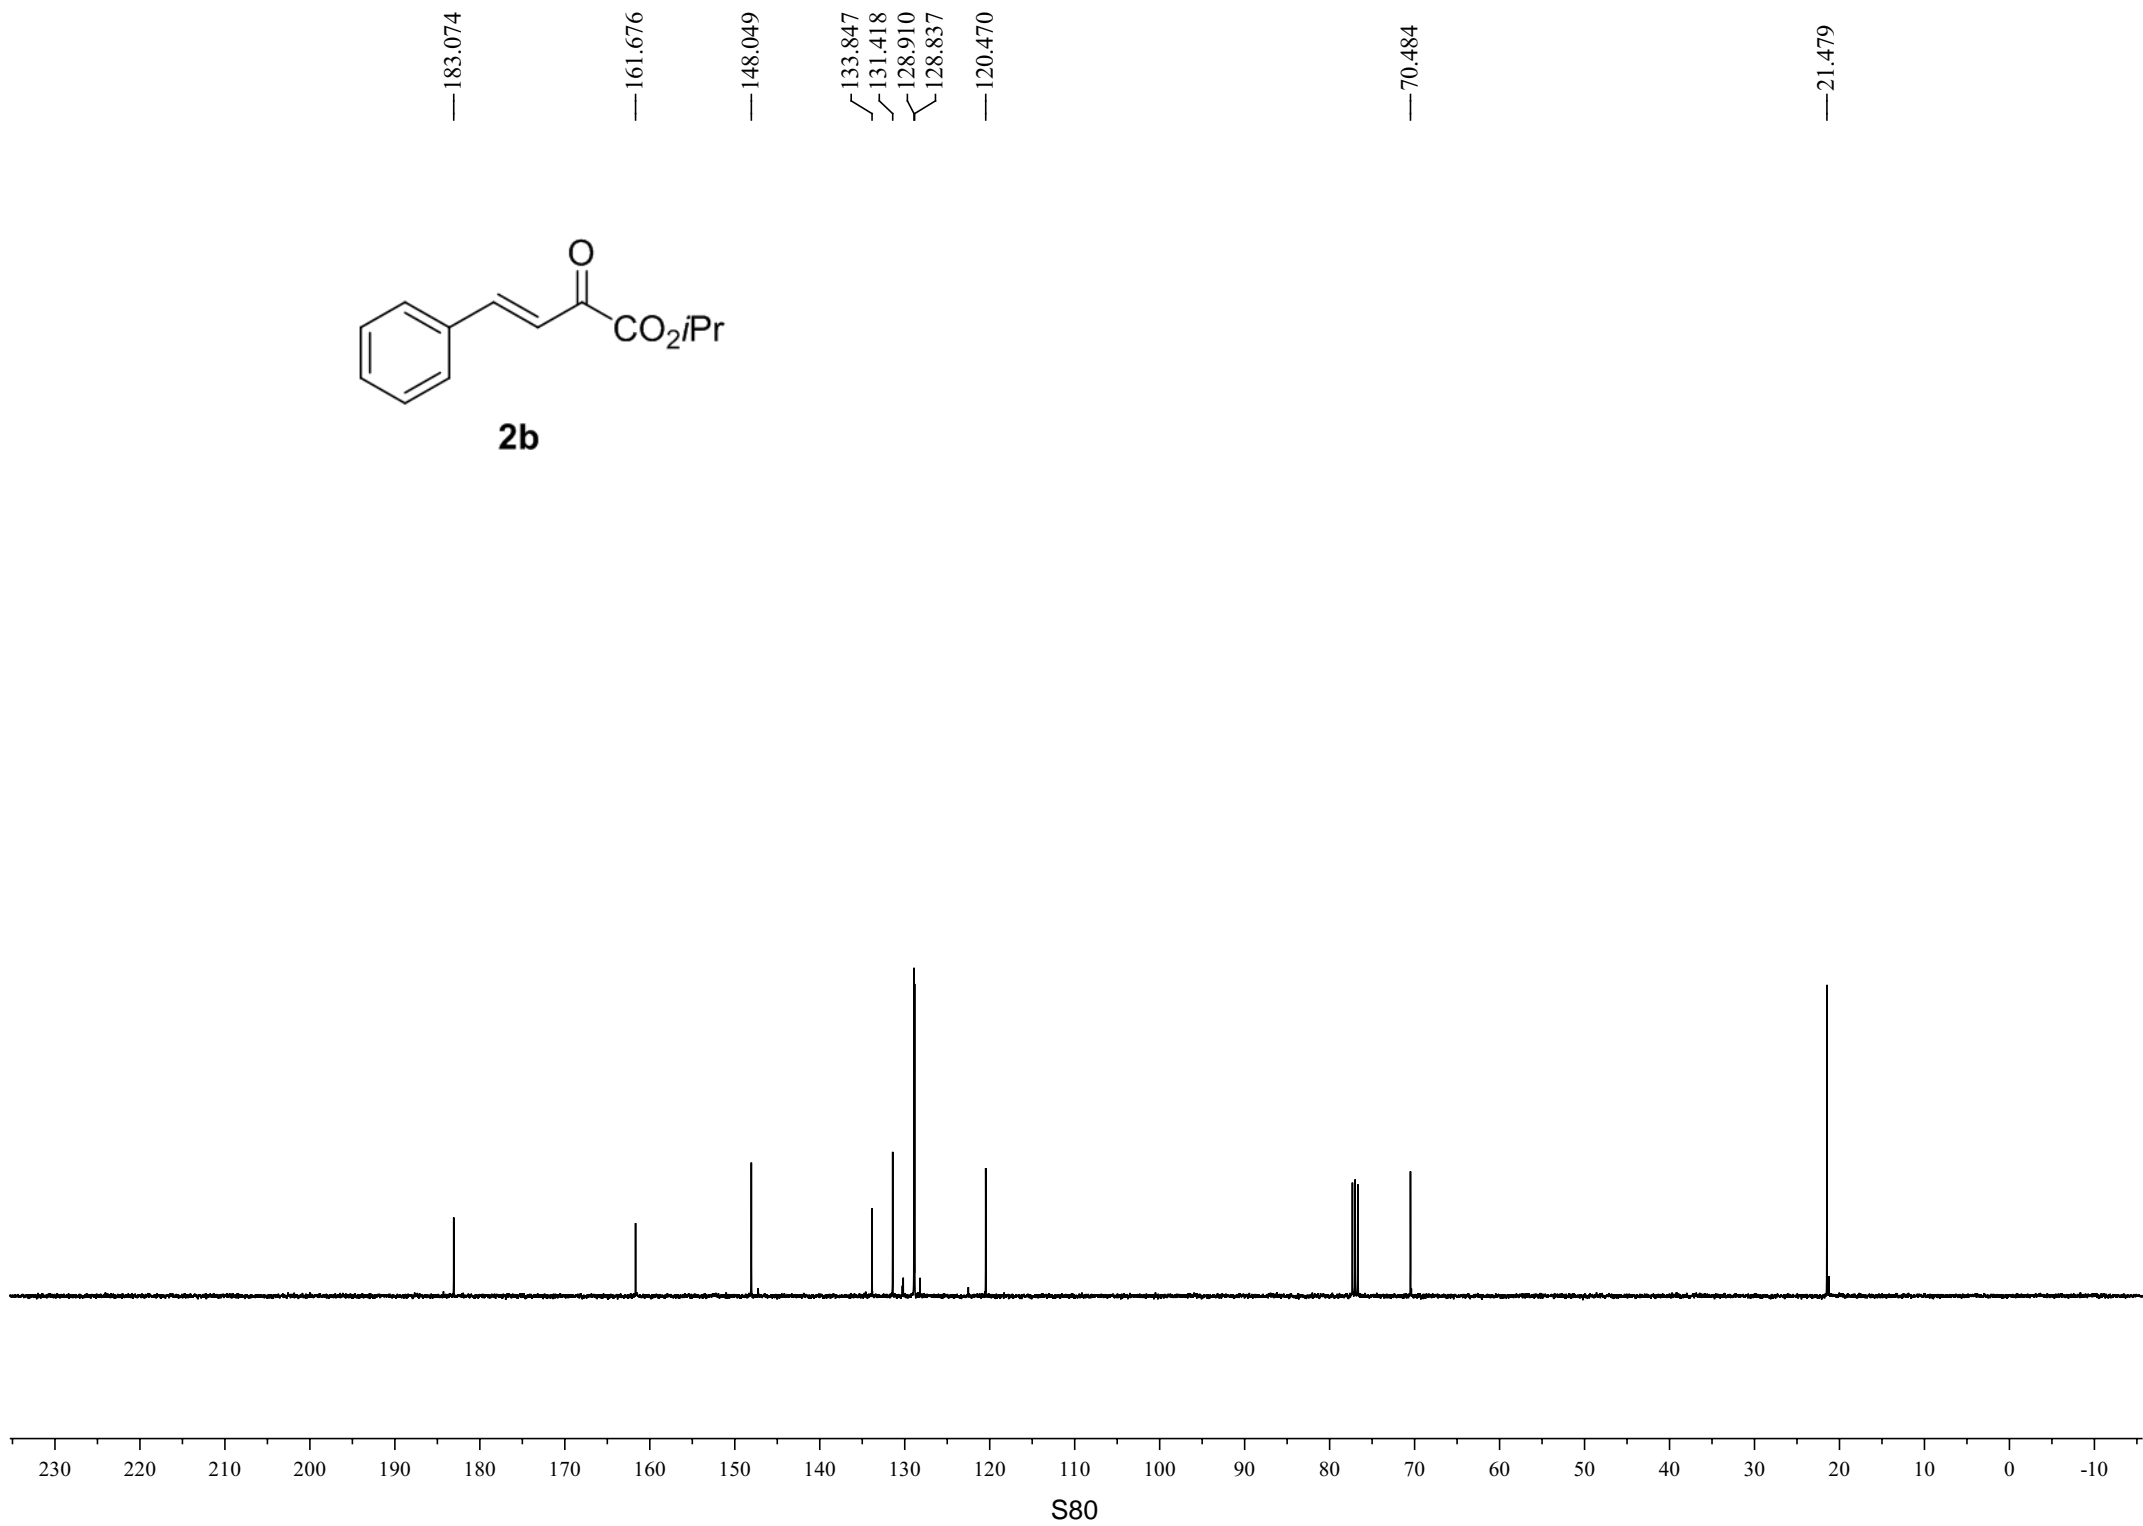



7.818  
7.815  
7.800  
7.795  
7.781  
7.740  
7.525  
7.522  
7.519  
7.506  
7.499  
7.495  
7.487  
7.469  
7.458  
7.454  
7.447  
7.322  
7.307  
7.282

4.954  
4.944  
4.931  
4.922  
4.912  
4.899  
4.889

1.923  
1.909  
1.902  
1.892  
1.881  
1.715  
1.706  
1.692  
1.683  
1.566  
1.557  
1.540  
1.533  
1.509  
1.501  
1.486  
1.478  
1.430  
1.422  
1.405  
1.397  
1.389  
1.380  
1.371  
1.364  
1.356  
1.347  
1.338  
1.314  
1.307  
1.297  
1.290  
1.282  
1.276  
1.267  
1.250

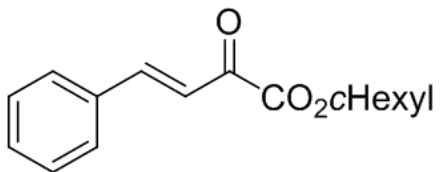

2c

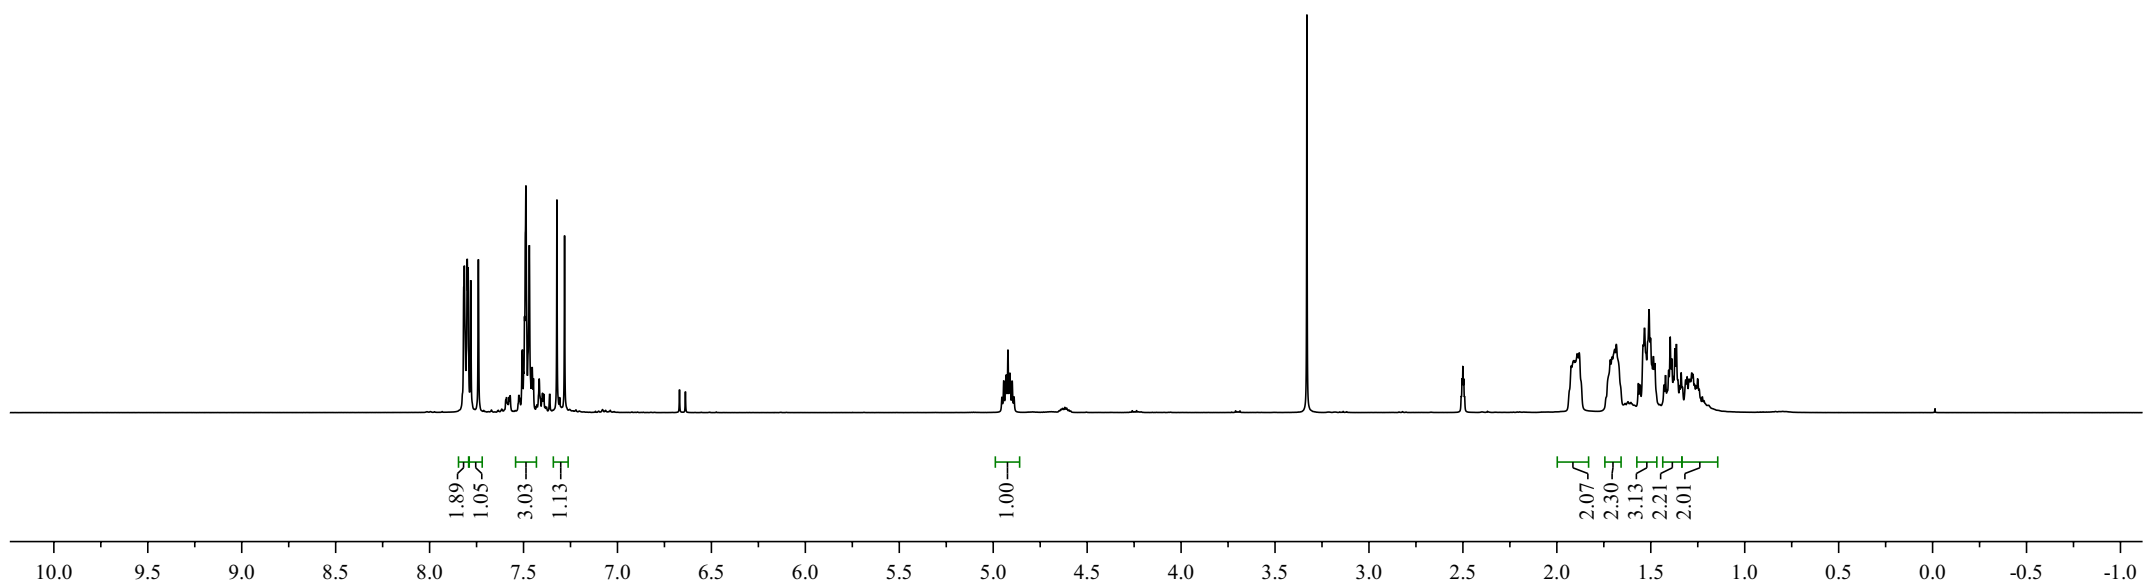

—184.382

—161.893

—147.997

—133.697

—131.661

—129.138

—129.100

—121.416

—74.525

—30.750

—24.666

—23.063

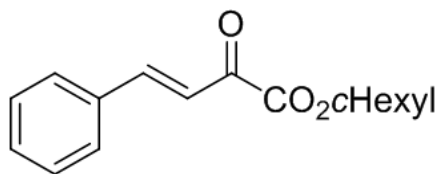

**2c**

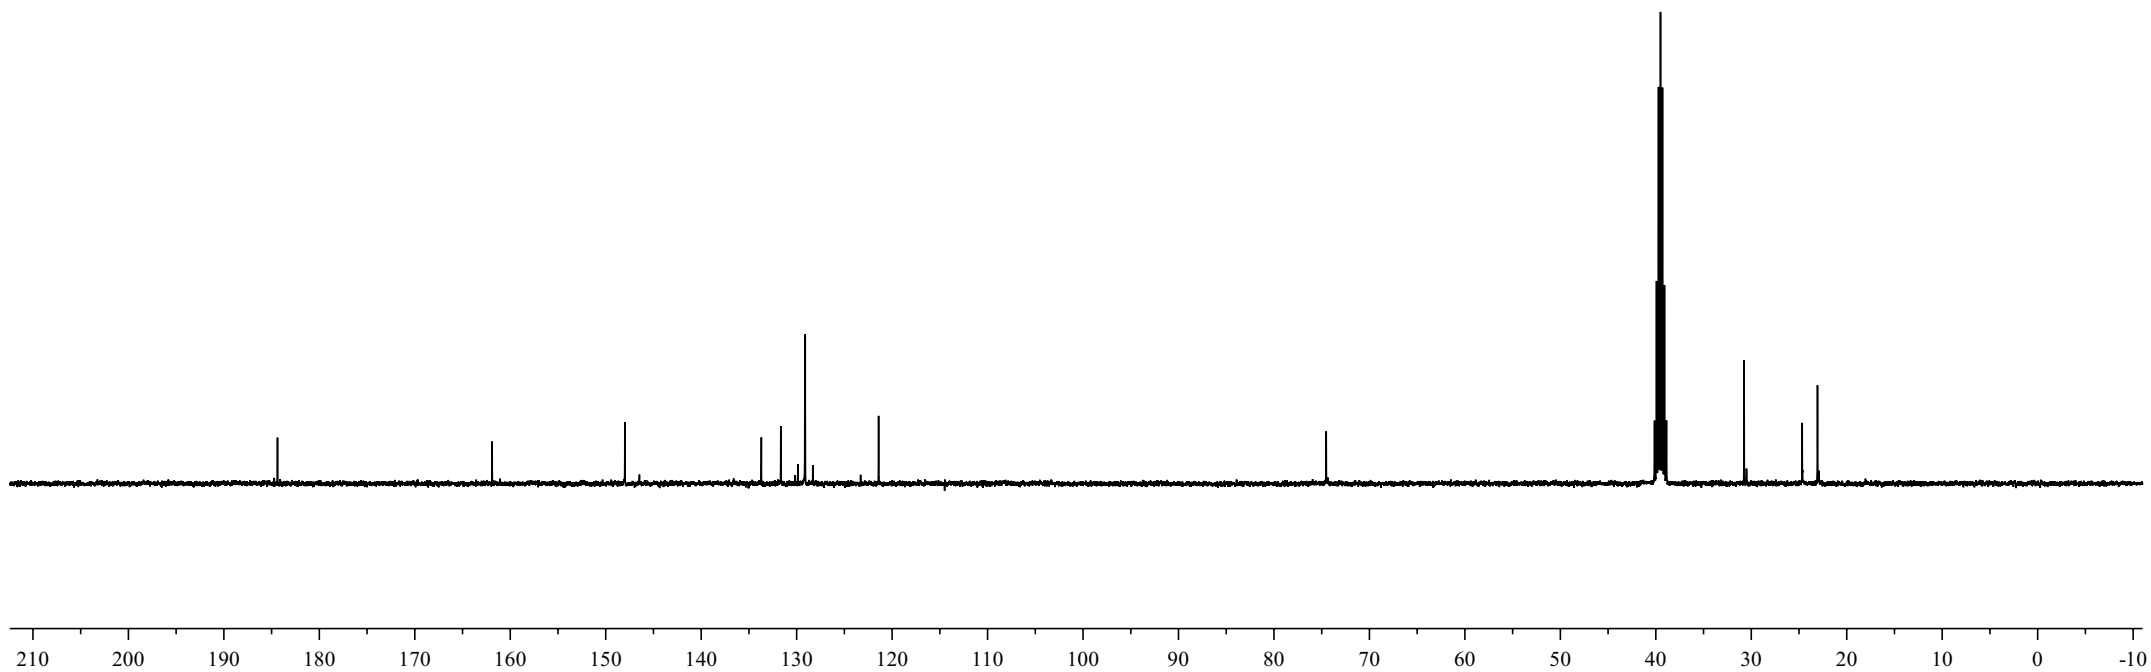

7.808  
7.805  
7.801  
7.785  
7.781  
7.768  
7.492  
7.488  
7.470  
7.439  
7.422  
7.418  
7.404  
7.396  
7.392  
7.379  
7.363  
7.322

5.355

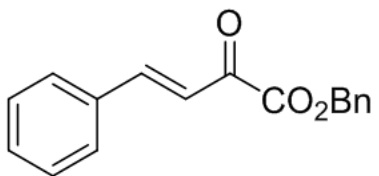

2d

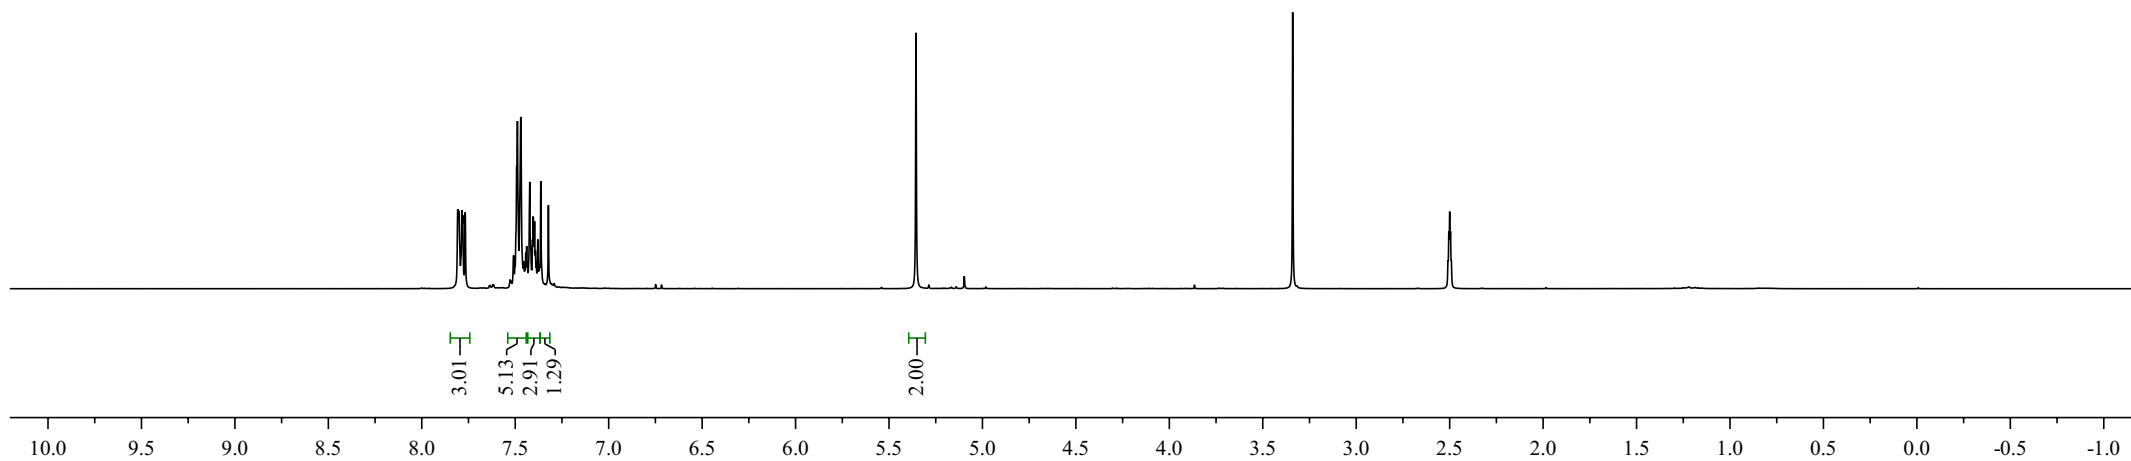

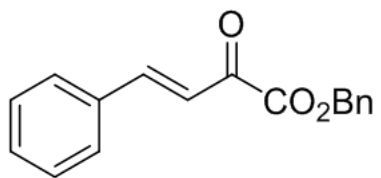

**2d**

—183.729

—162.169

—148.211

135.036

131.729

129.161

129.133

128.552

128.536

128.495

121.342

—67.263

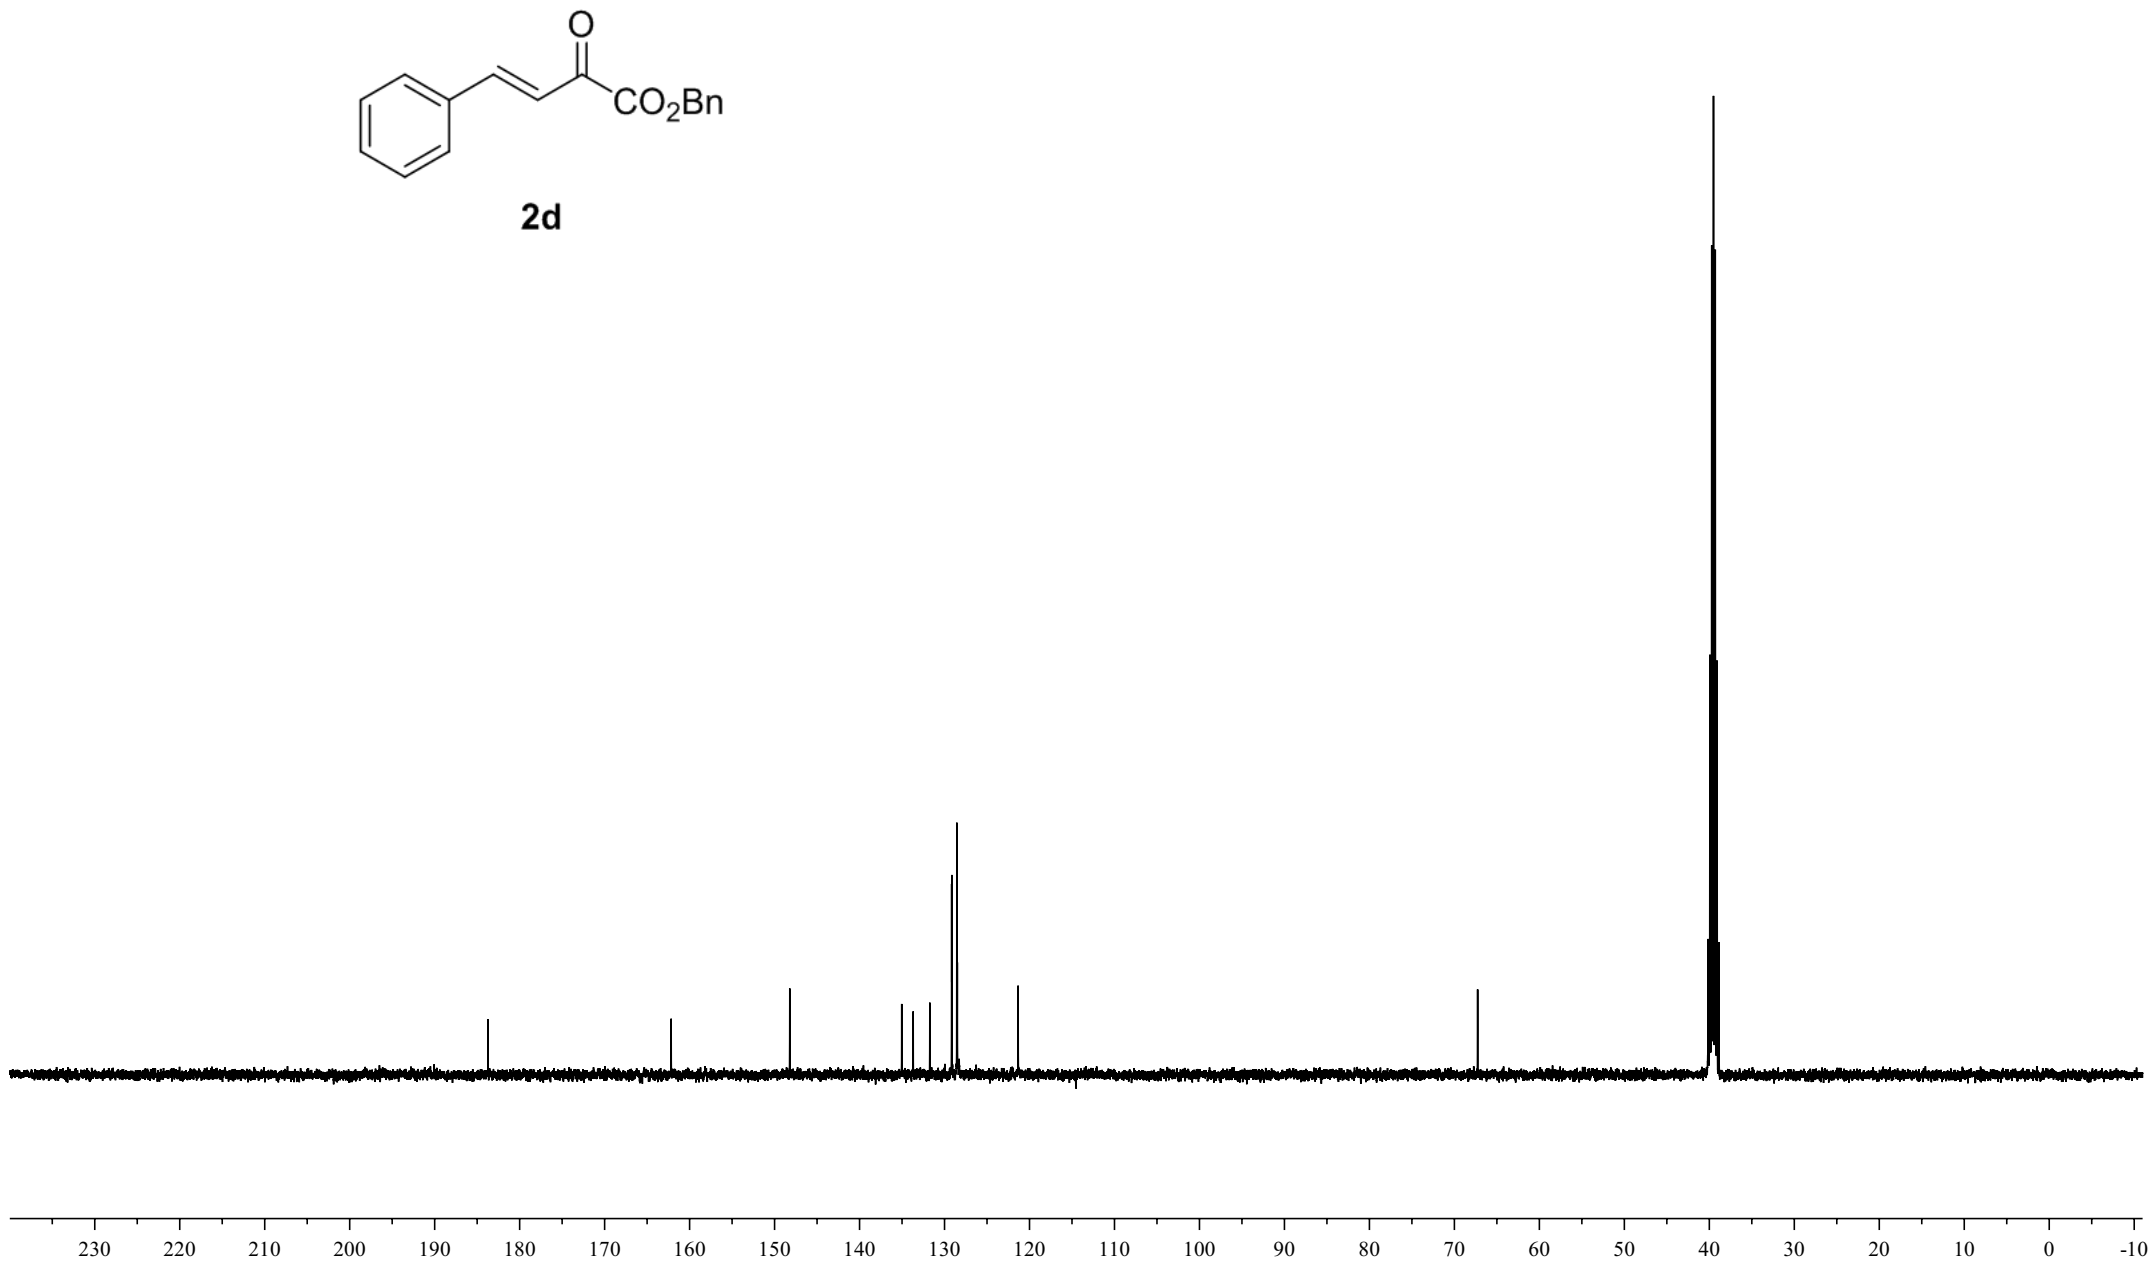

8.188  
8.161  
7.688  
7.675  
7.341  
7.329  
7.317  
7.300  
7.273  
7.251  
7.238  
7.233  
7.226  
7.220

4.413  
4.401  
4.389  
4.377

2.466

1.426  
1.414  
1.402

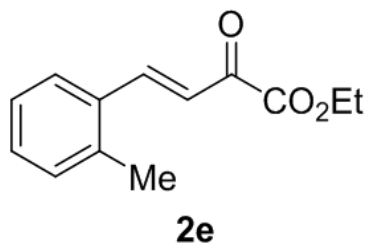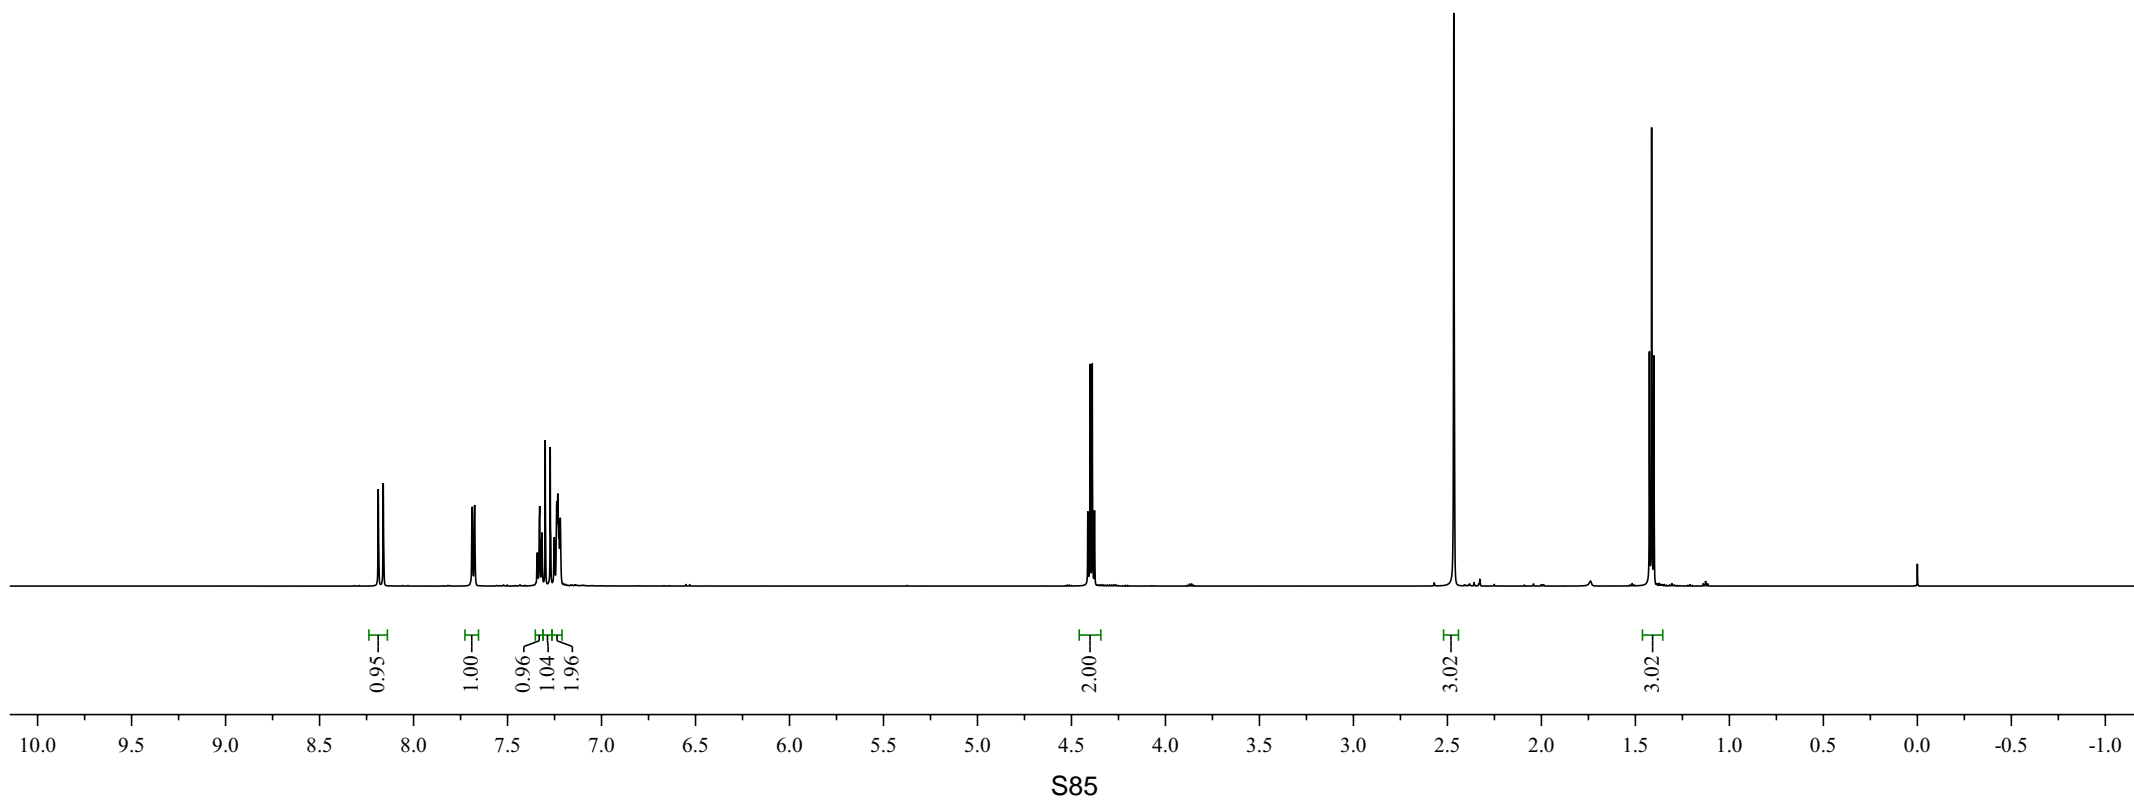

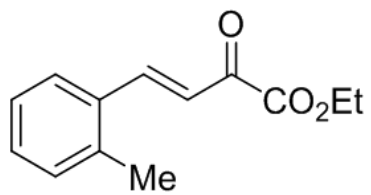

**2e**

—182.790

—162.217

—145.742

—138.995

—132.807

—131.287

—131.004

—126.704

—126.427

—121.350

—62.369

—19.661

—13.999

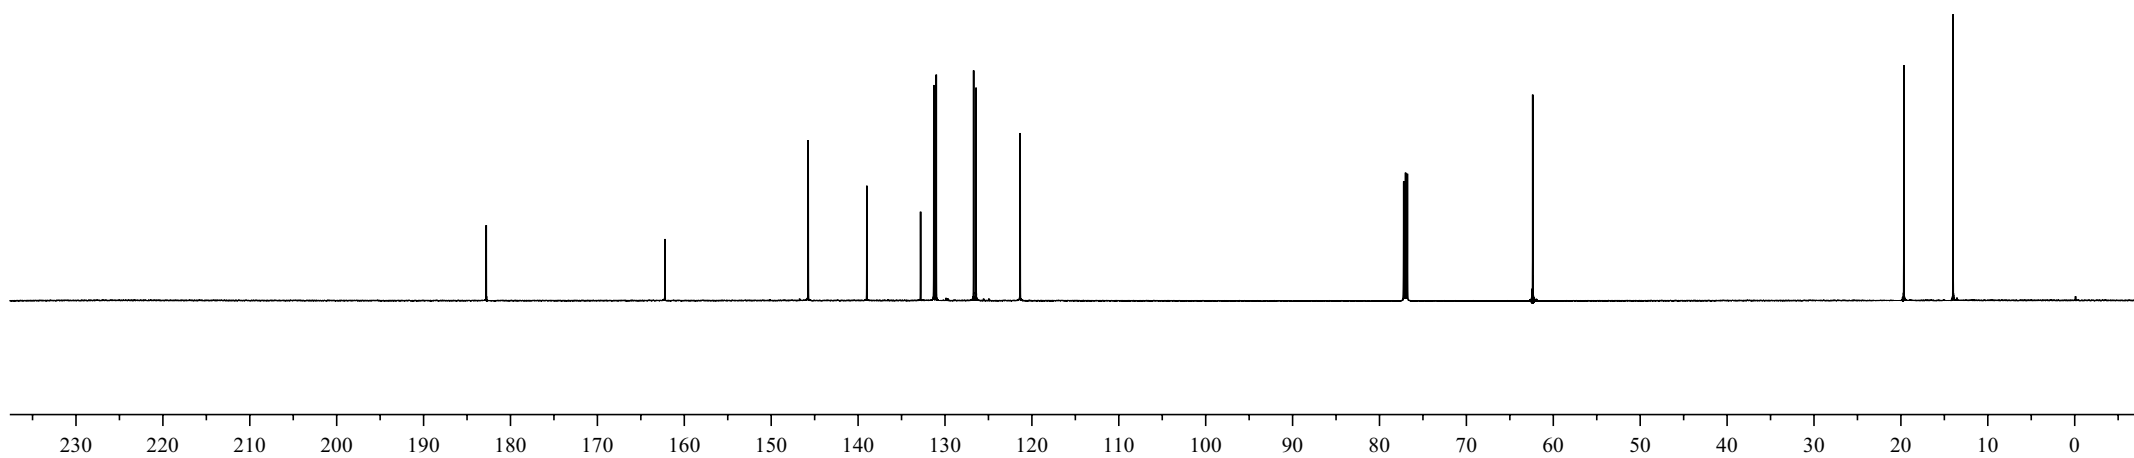

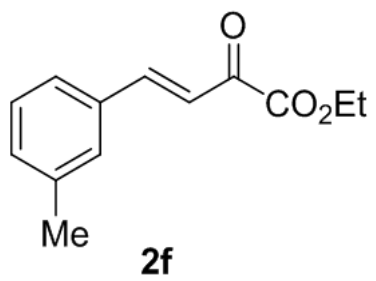

7.854  
7.814  
7.443  
7.425  
7.369  
7.329  
7.311  
7.291  
7.271  
7.252

4.416  
4.398  
4.380  
4.362

—2.384

1.570  
1.426  
1.408  
1.391

—-0.012

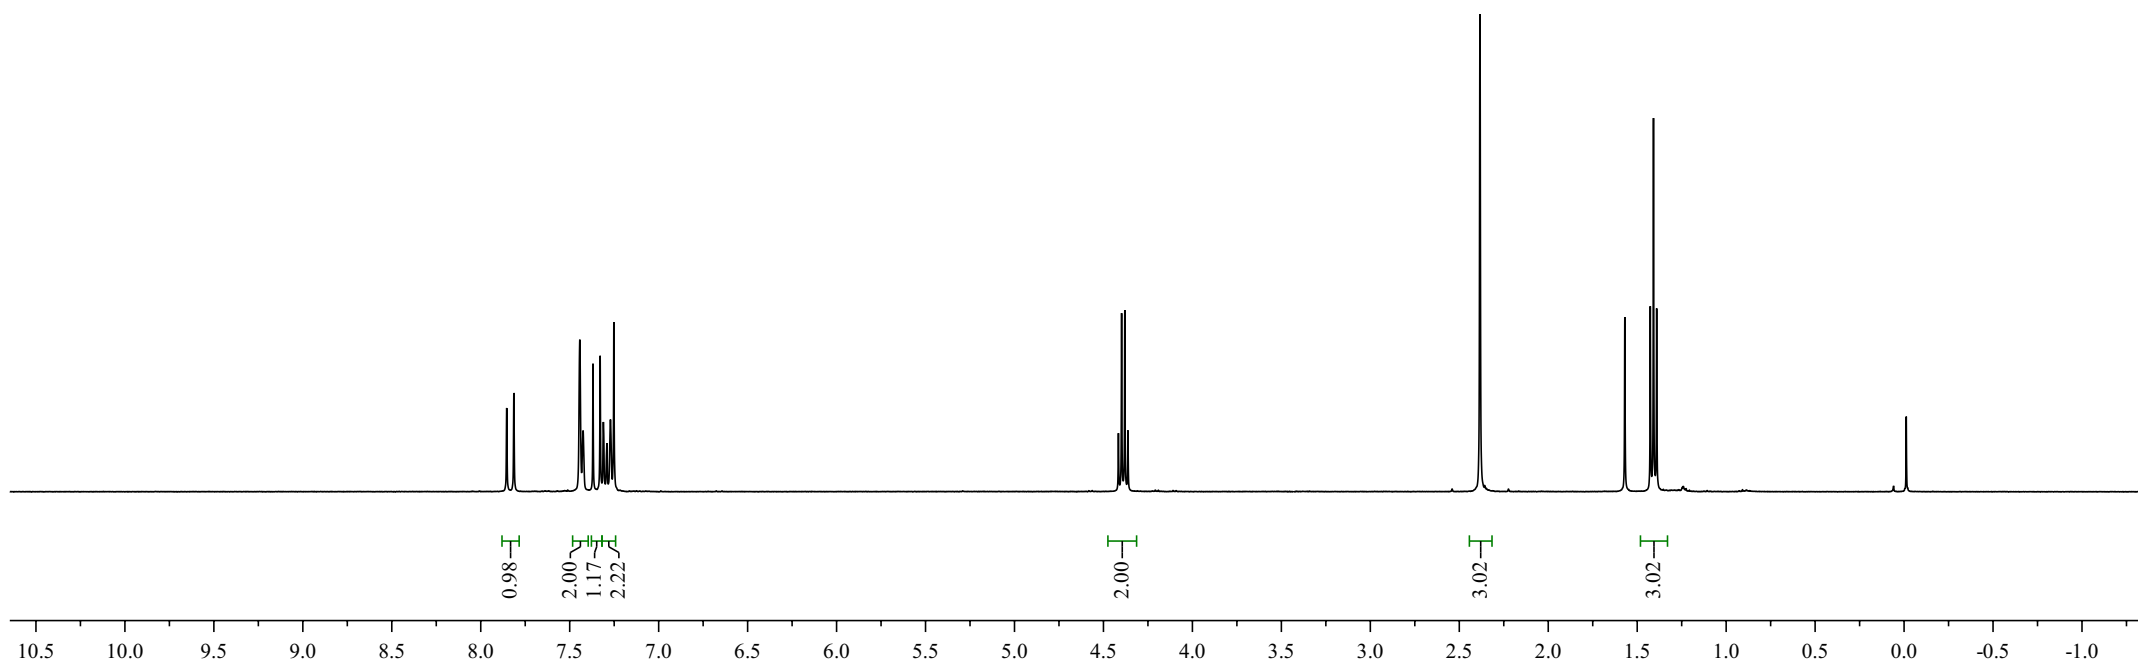

—182.883

—162.269

—148.701

—138.796

—133.961

—132.510

—129.587

—128.948

—126.321

—120.327

—62.467

—21.256

—14.053

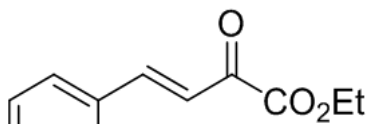

Me

**2f**

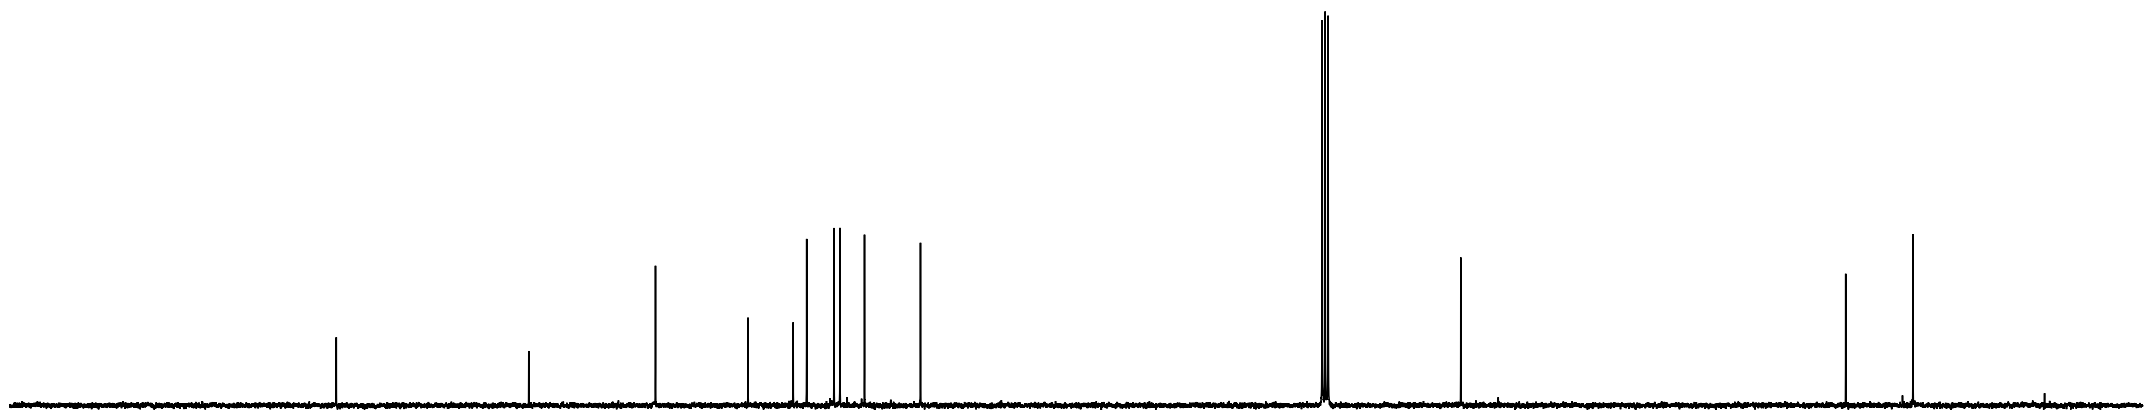



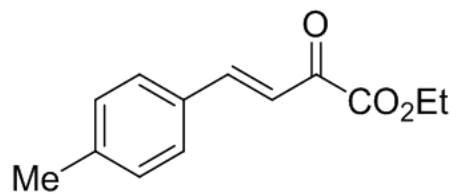

**2g**

7.775  
7.734  
7.698  
7.678  
7.282  
7.259  
7.242

4.354  
4.337  
4.319  
4.301

2.341

1.334  
1.316  
1.298

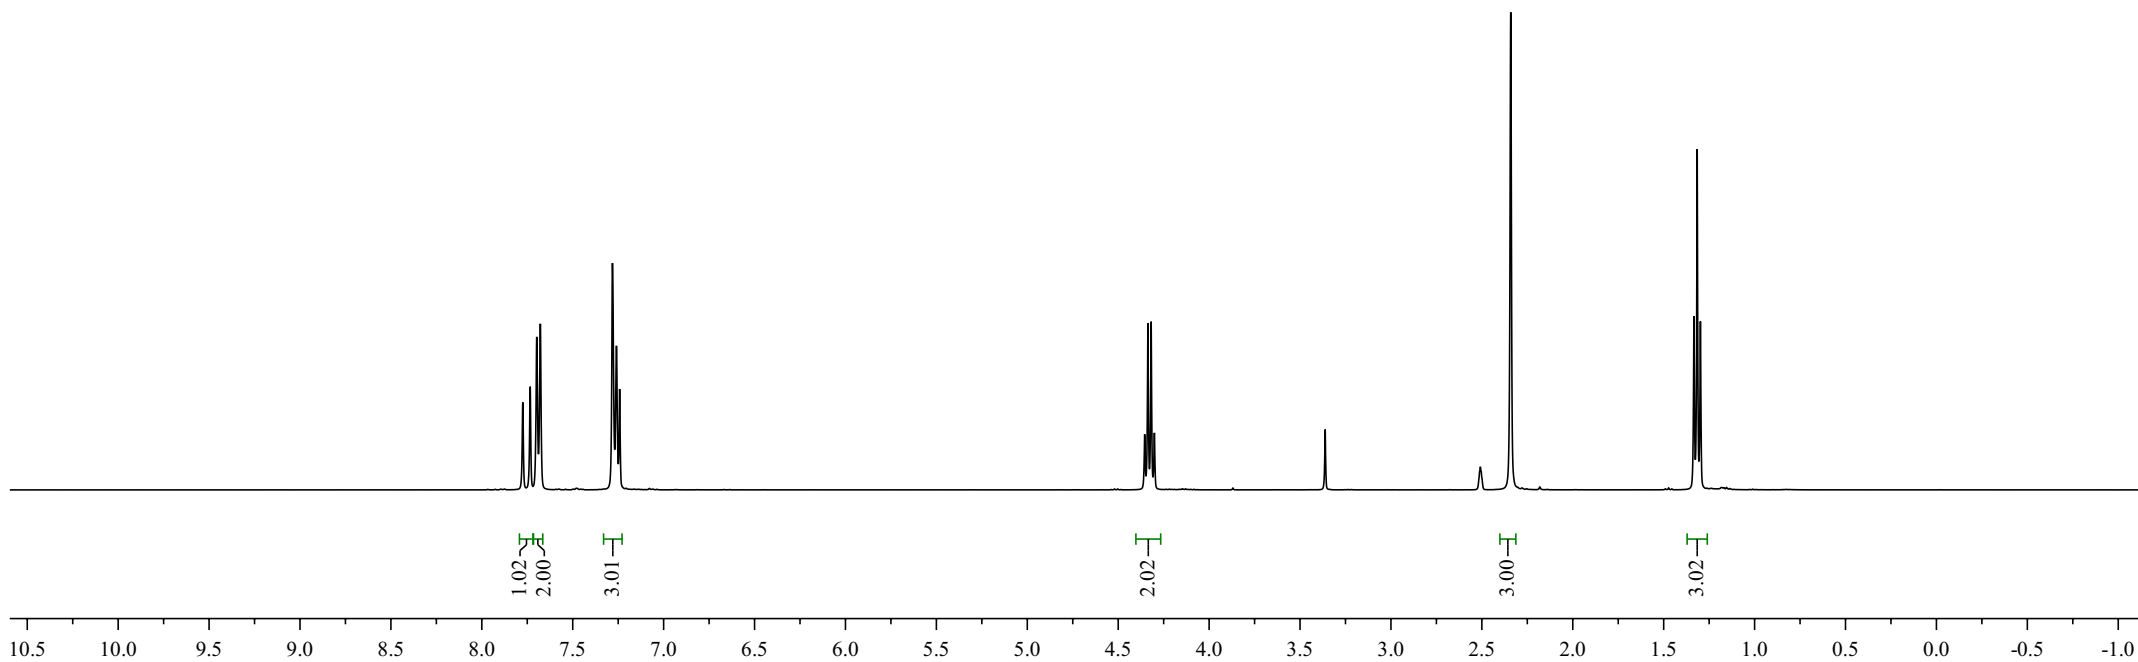



**2g**

— 183.880

— 162.491

— 148.105

— 142.029

— 131.041

— 129.713

— 129.193

— 120.233

— 61.890

— 21.092

— 13.800

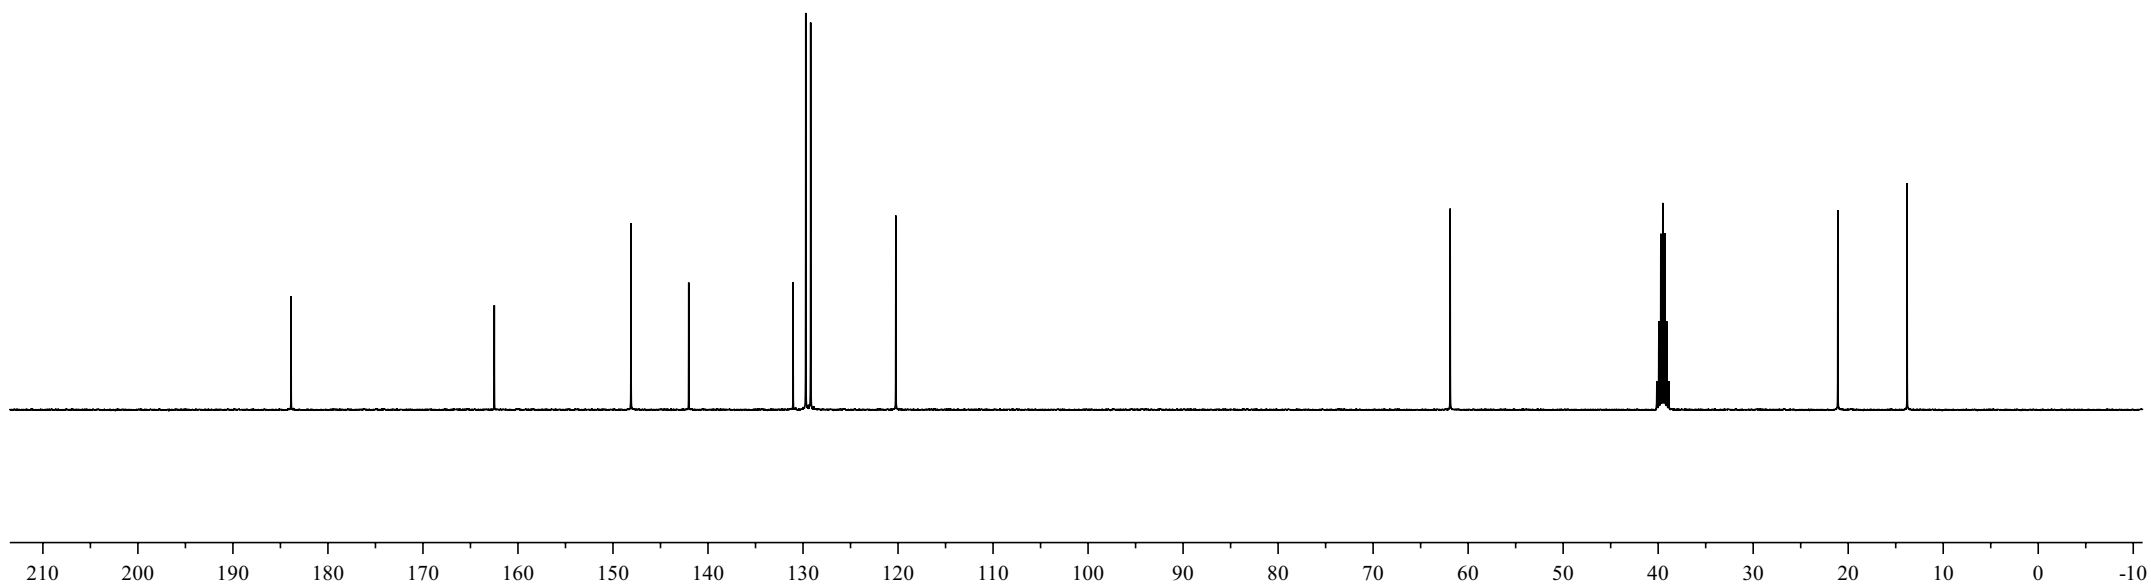

8.004  
7.977  
7.807  
7.804  
7.794  
7.791  
7.516  
7.514  
7.504  
7.502  
7.500  
7.490  
7.487  
7.362  
7.335  
7.146  
7.133  
7.045  
7.032  
7.020

4.336  
4.324  
4.312  
4.300  
— 3.895

1.324  
1.312  
1.300

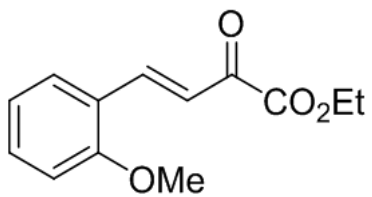

2h

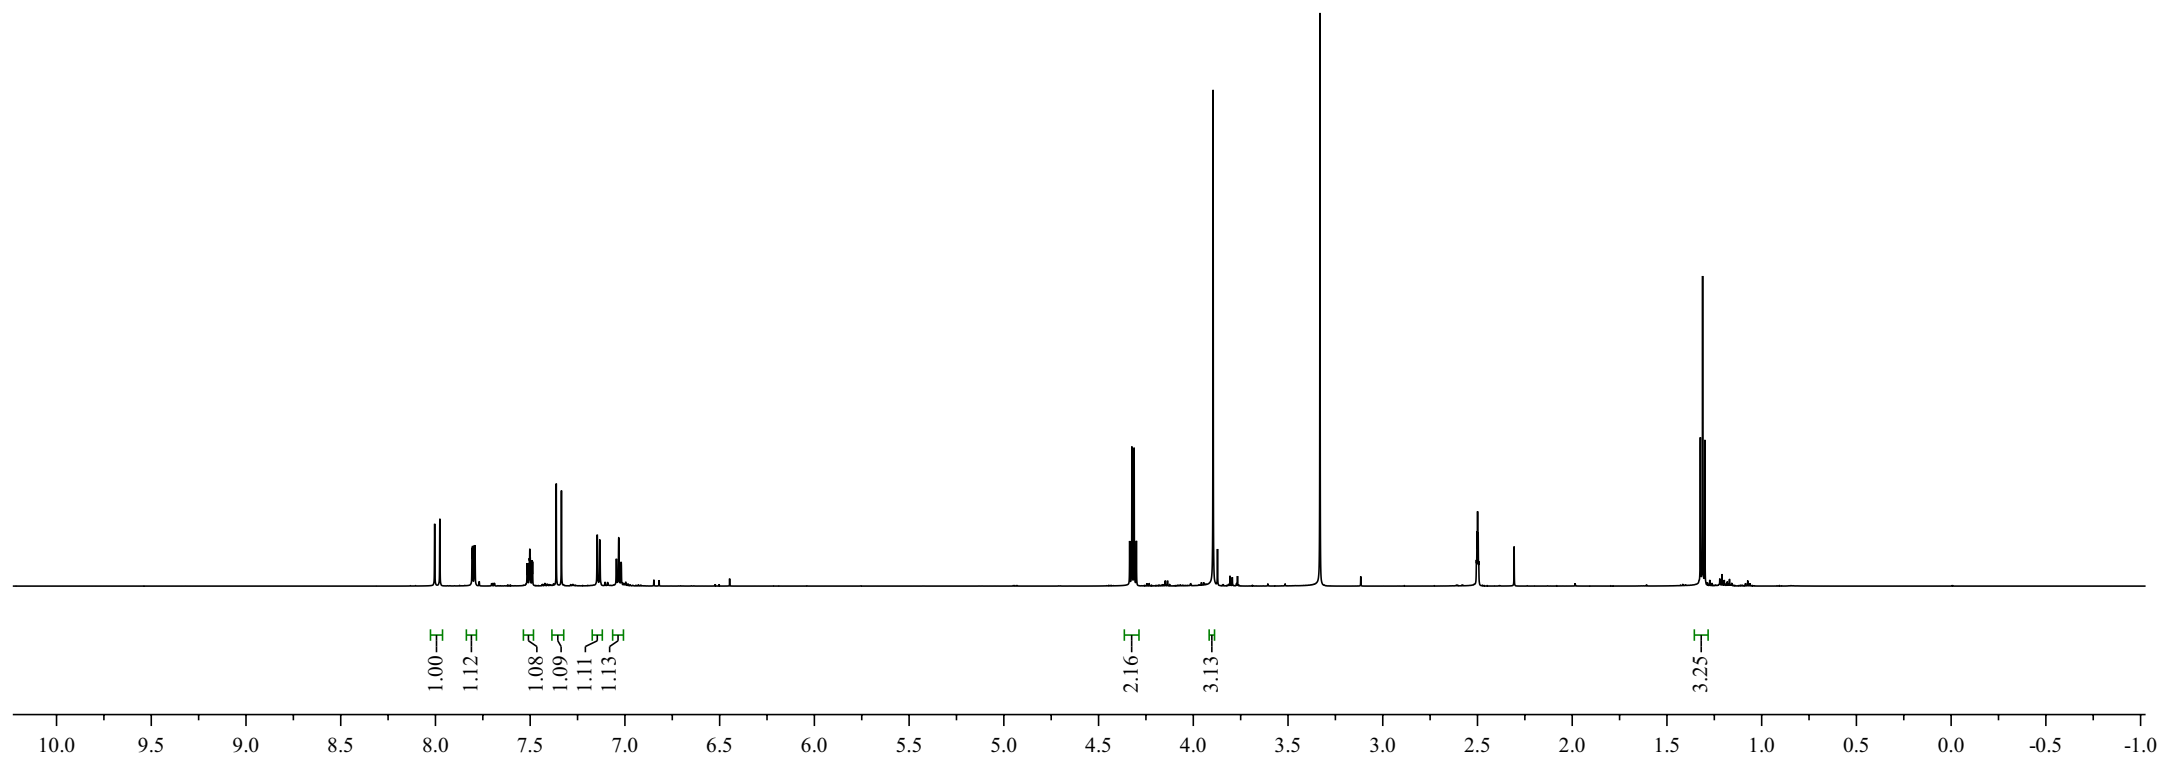

S91

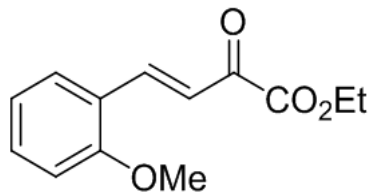

2h

—184.008

—162.505

—158.714

—142.704

—133.571

—129.413

121.936

121.325

120.917

—112.025

—61.918

—55.843

—13.877

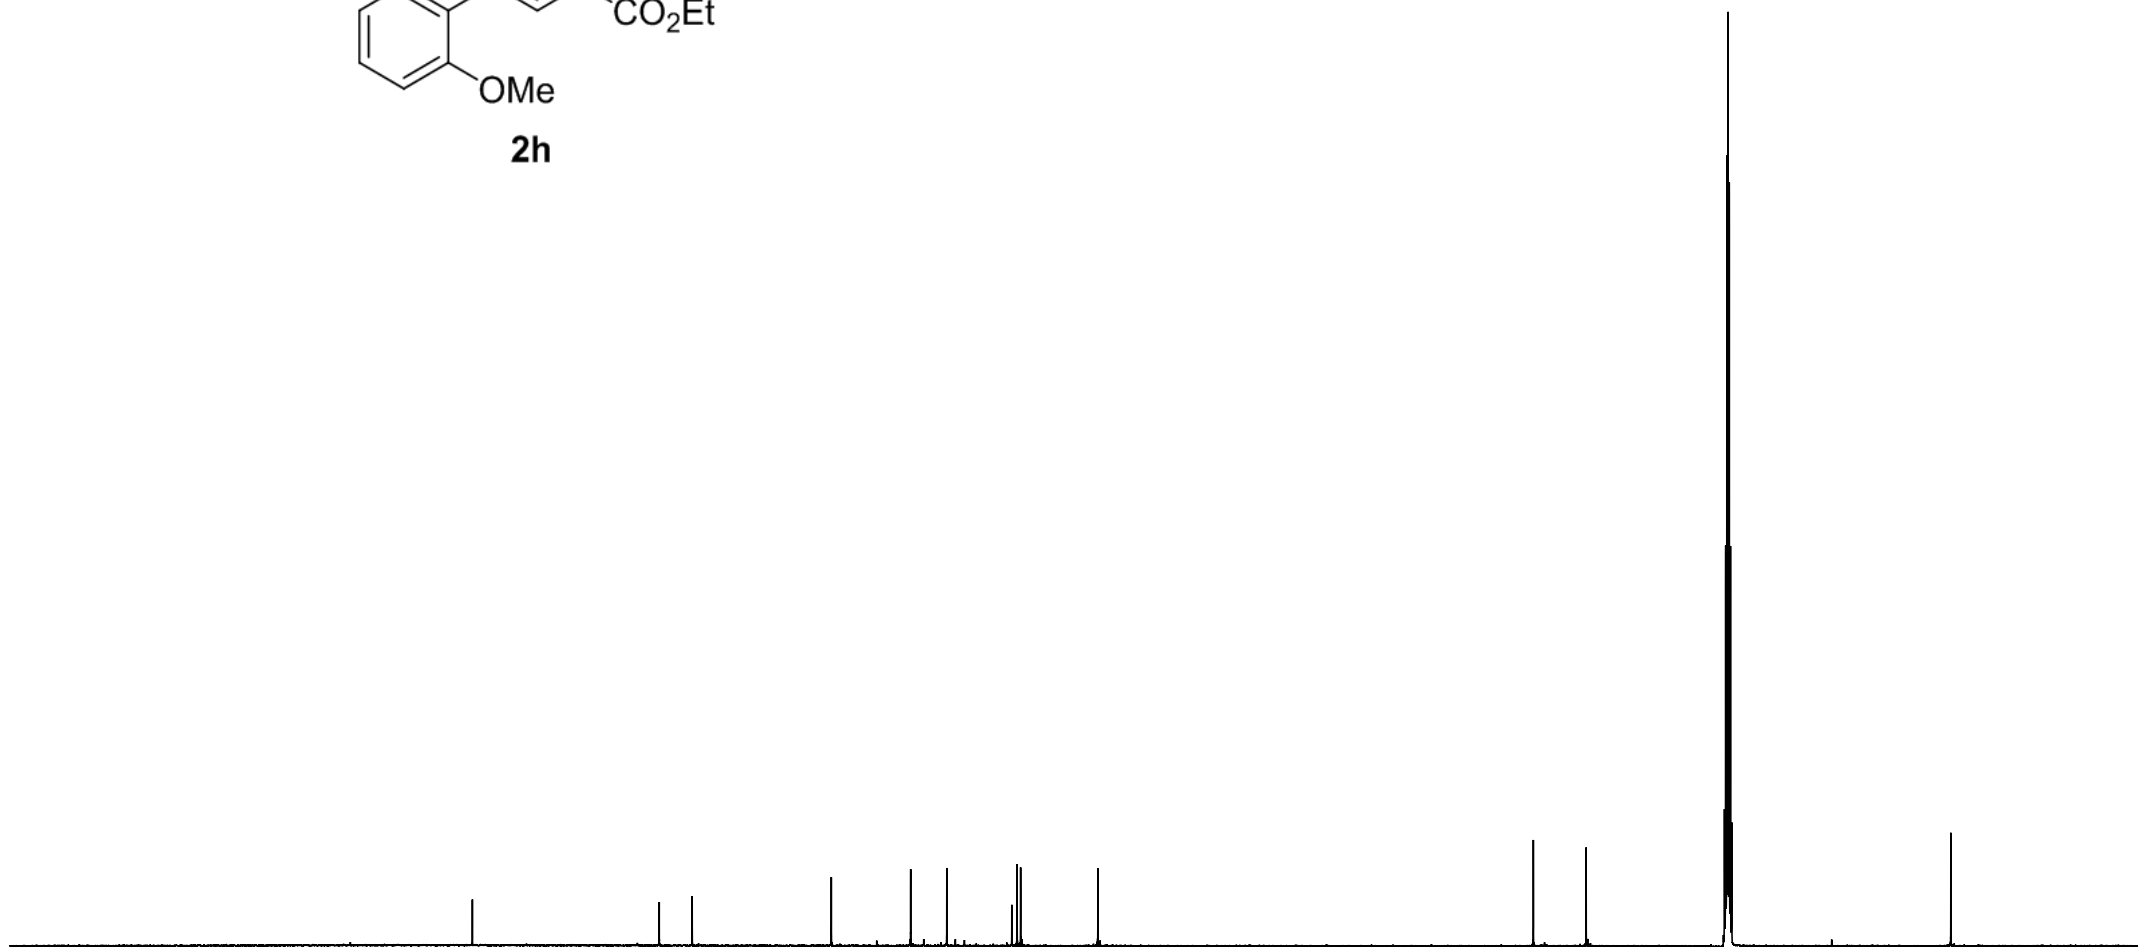

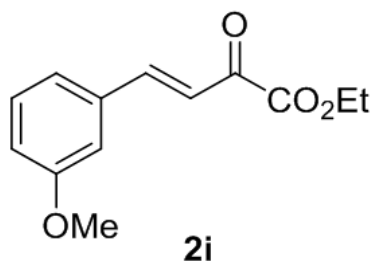

7.832  
7.817  
7.792  
7.777  
7.361  
7.355  
7.348  
7.321  
7.315  
7.308  
7.300  
7.295  
7.222  
7.207  
7.121  
7.002  
6.997  
6.989  
6.982

4.400  
4.389  
4.382  
4.371  
3.832  
3.819

1.428  
1.423  
1.417  
1.410  
1.406  
1.399  
1.393  
1.381

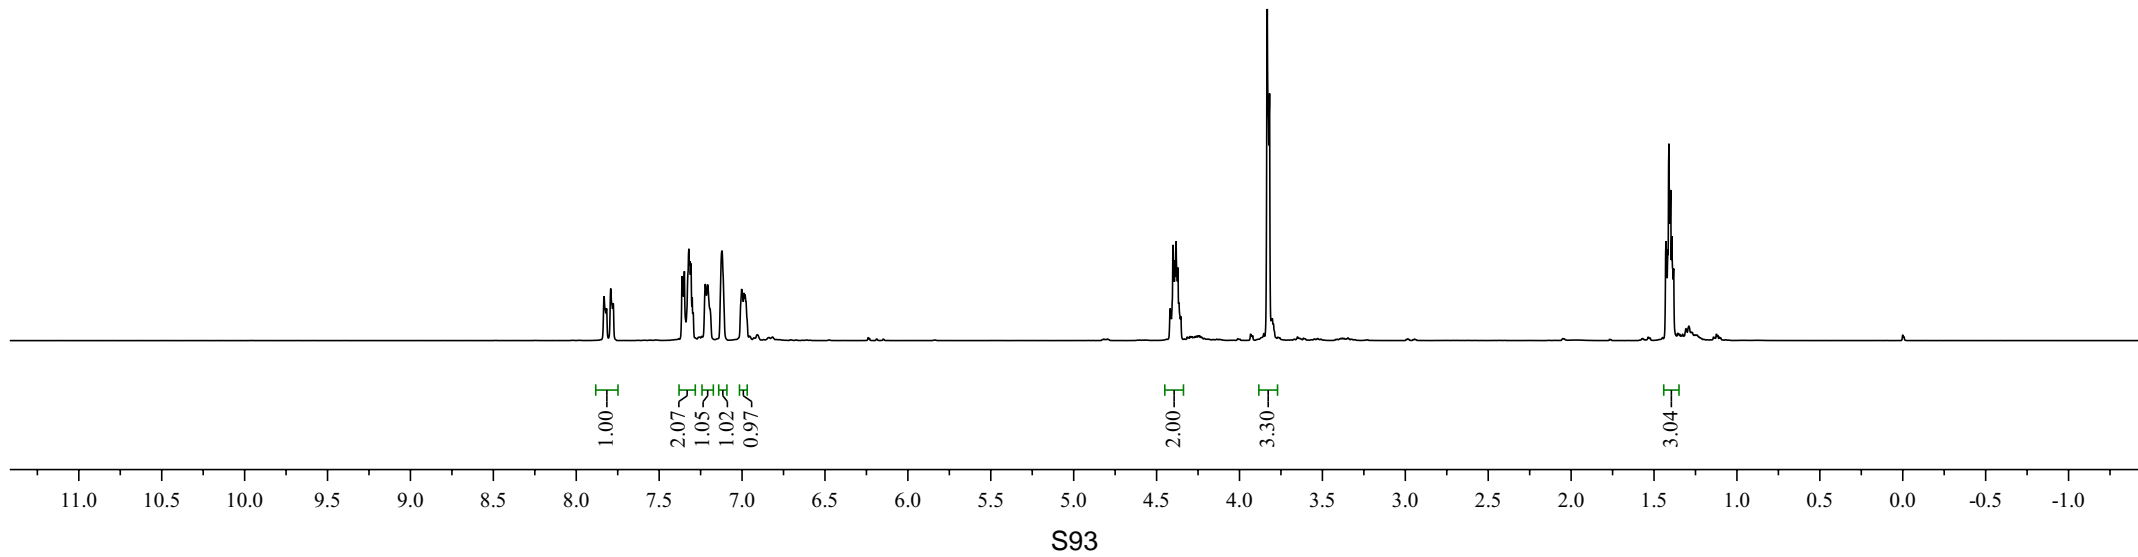



— 182.594

~ 161.978

~ 159.760

— 148.157

— 135.121

— 129.891

~ 121.660

~ 120.528

~ 117.496

~ 113.327

— 62.344

— 55.150

— 13.889

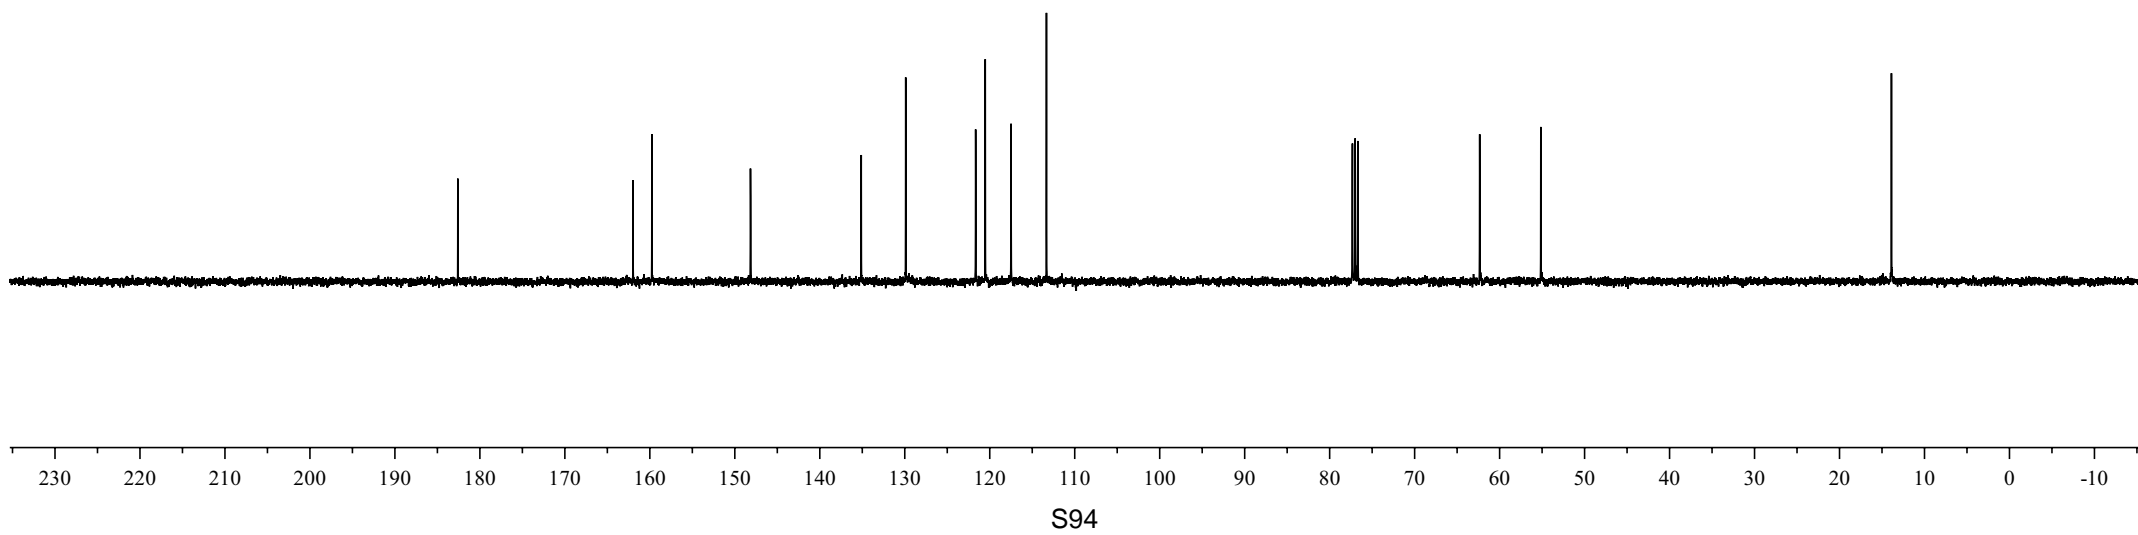

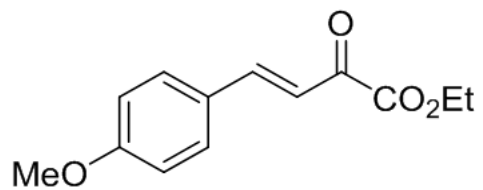

**2j**

7.785  
7.745  
7.554  
7.532  
7.216  
7.176  
6.910  
6.888

4.393  
4.376  
4.358  
4.340

3.813

1.409  
1.392  
1.374

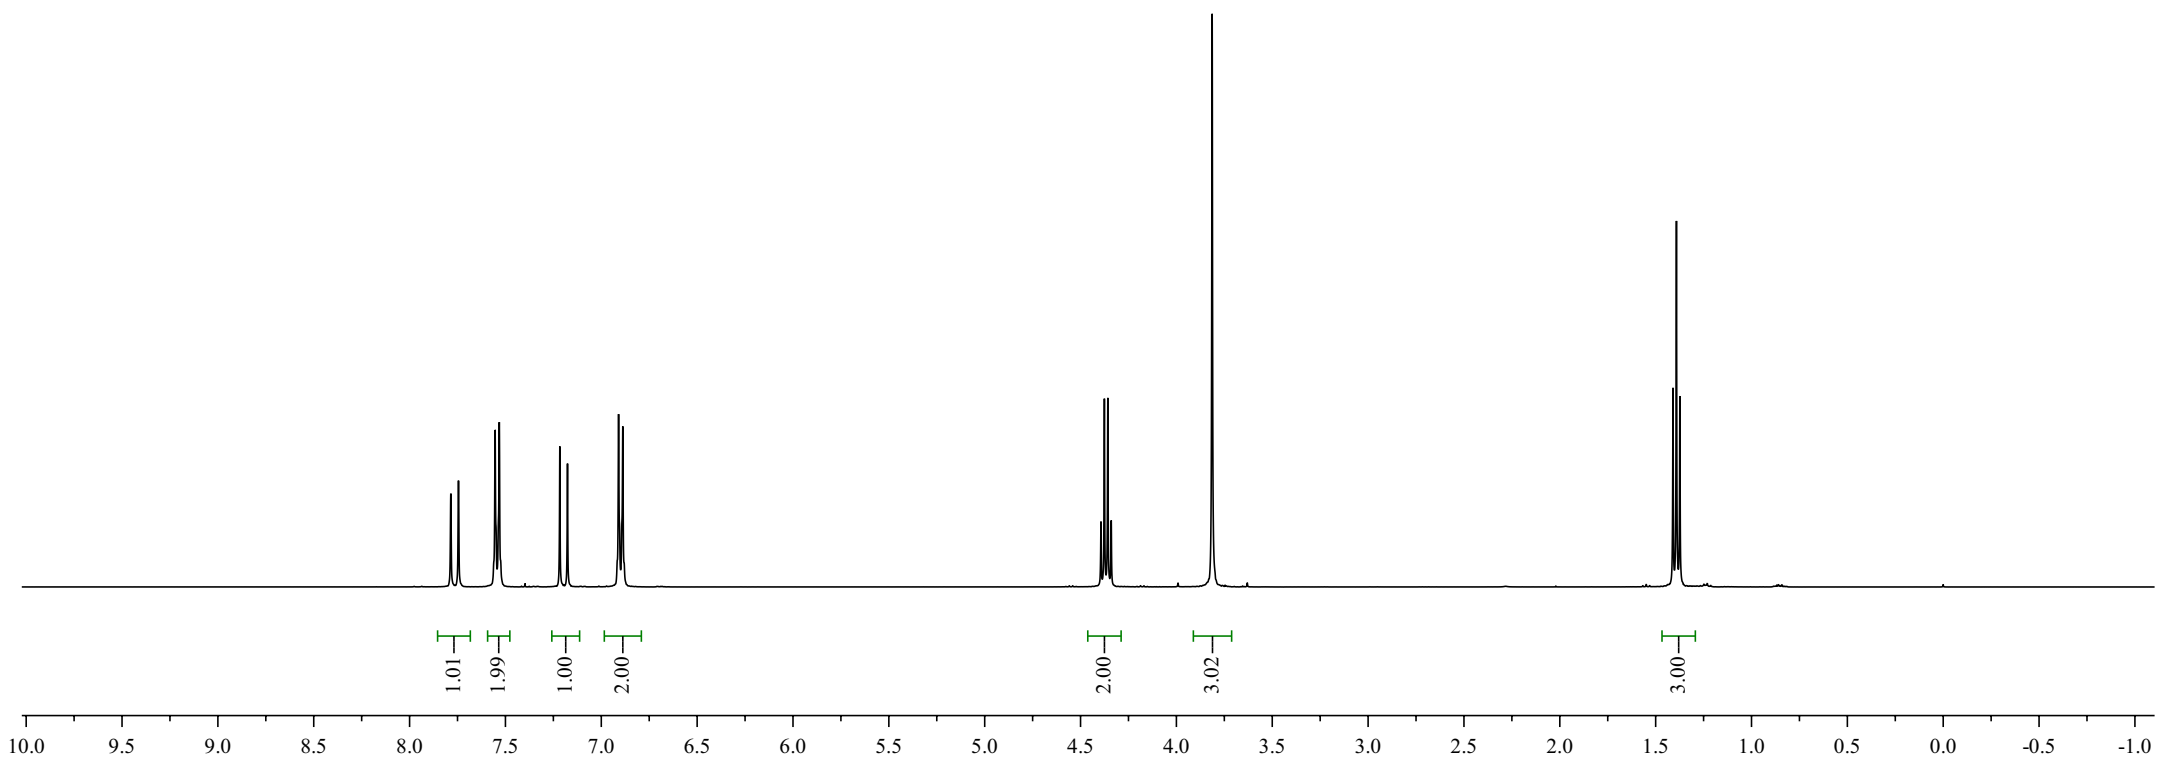

S95

—182.163

162.129  
162.007

—147.681

—130.592

—126.249

—117.669

—114.111

—61.841

—54.935

—13.611

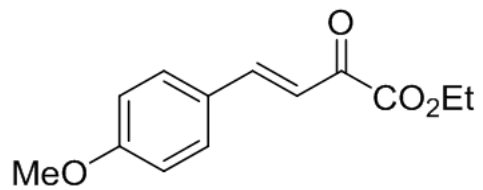

**2j**

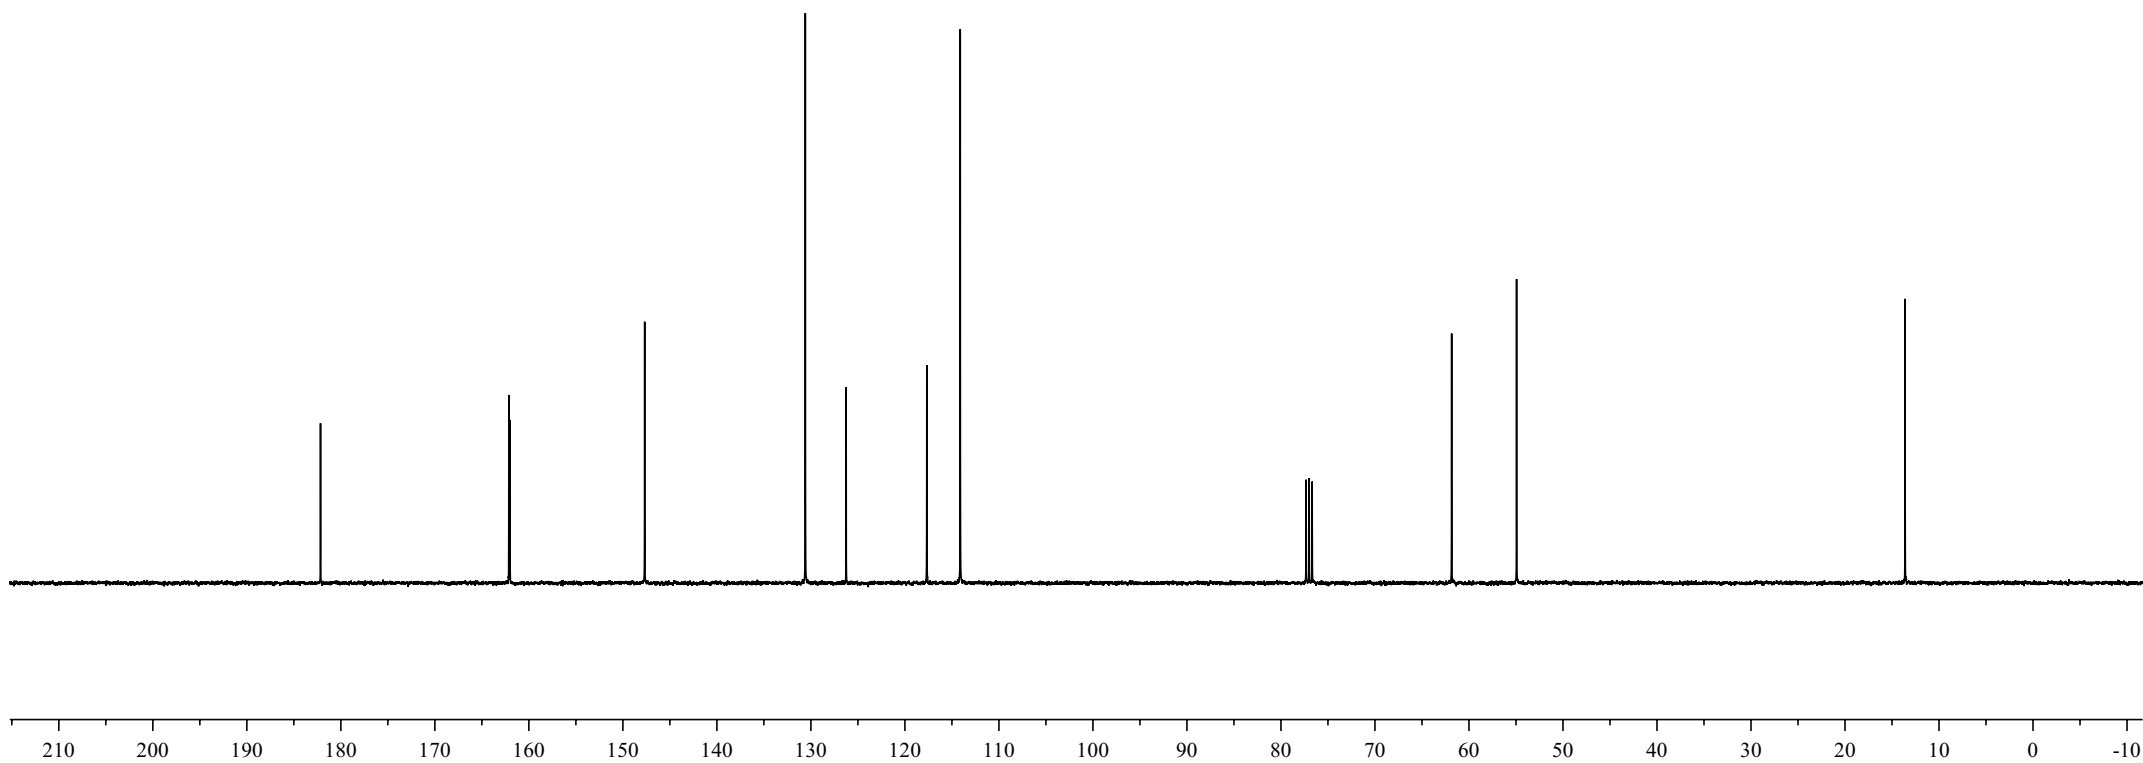



8.071  
8.044  
8.028  
8.026  
8.015  
8.013  
7.591  
7.589  
7.578  
7.576  
7.541  
7.538  
7.528  
7.526  
7.515  
7.513  
7.469  
7.468  
7.456  
7.442  
7.441  
7.439  
7.412

4.382  
4.371  
4.359  
4.347

1.368  
1.356  
1.344

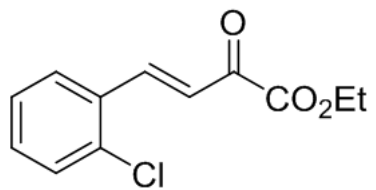

**2k**

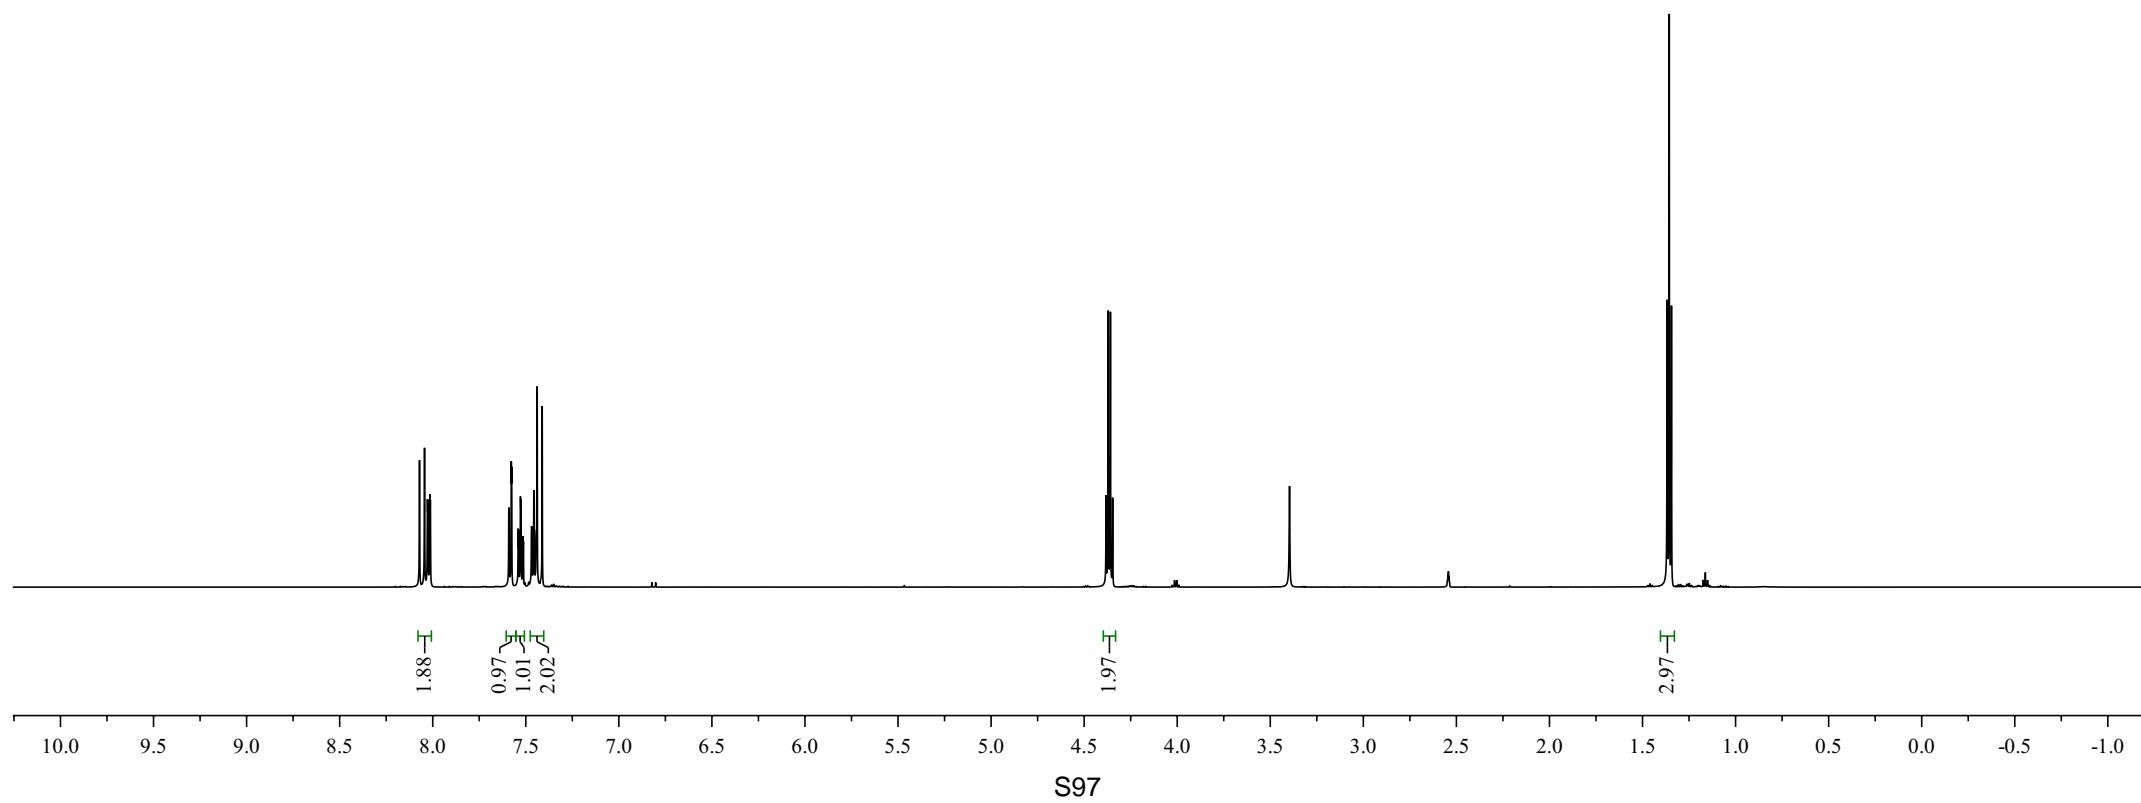

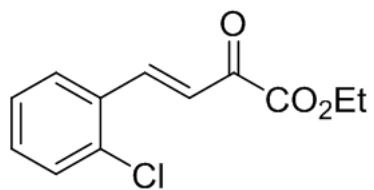

**2k**

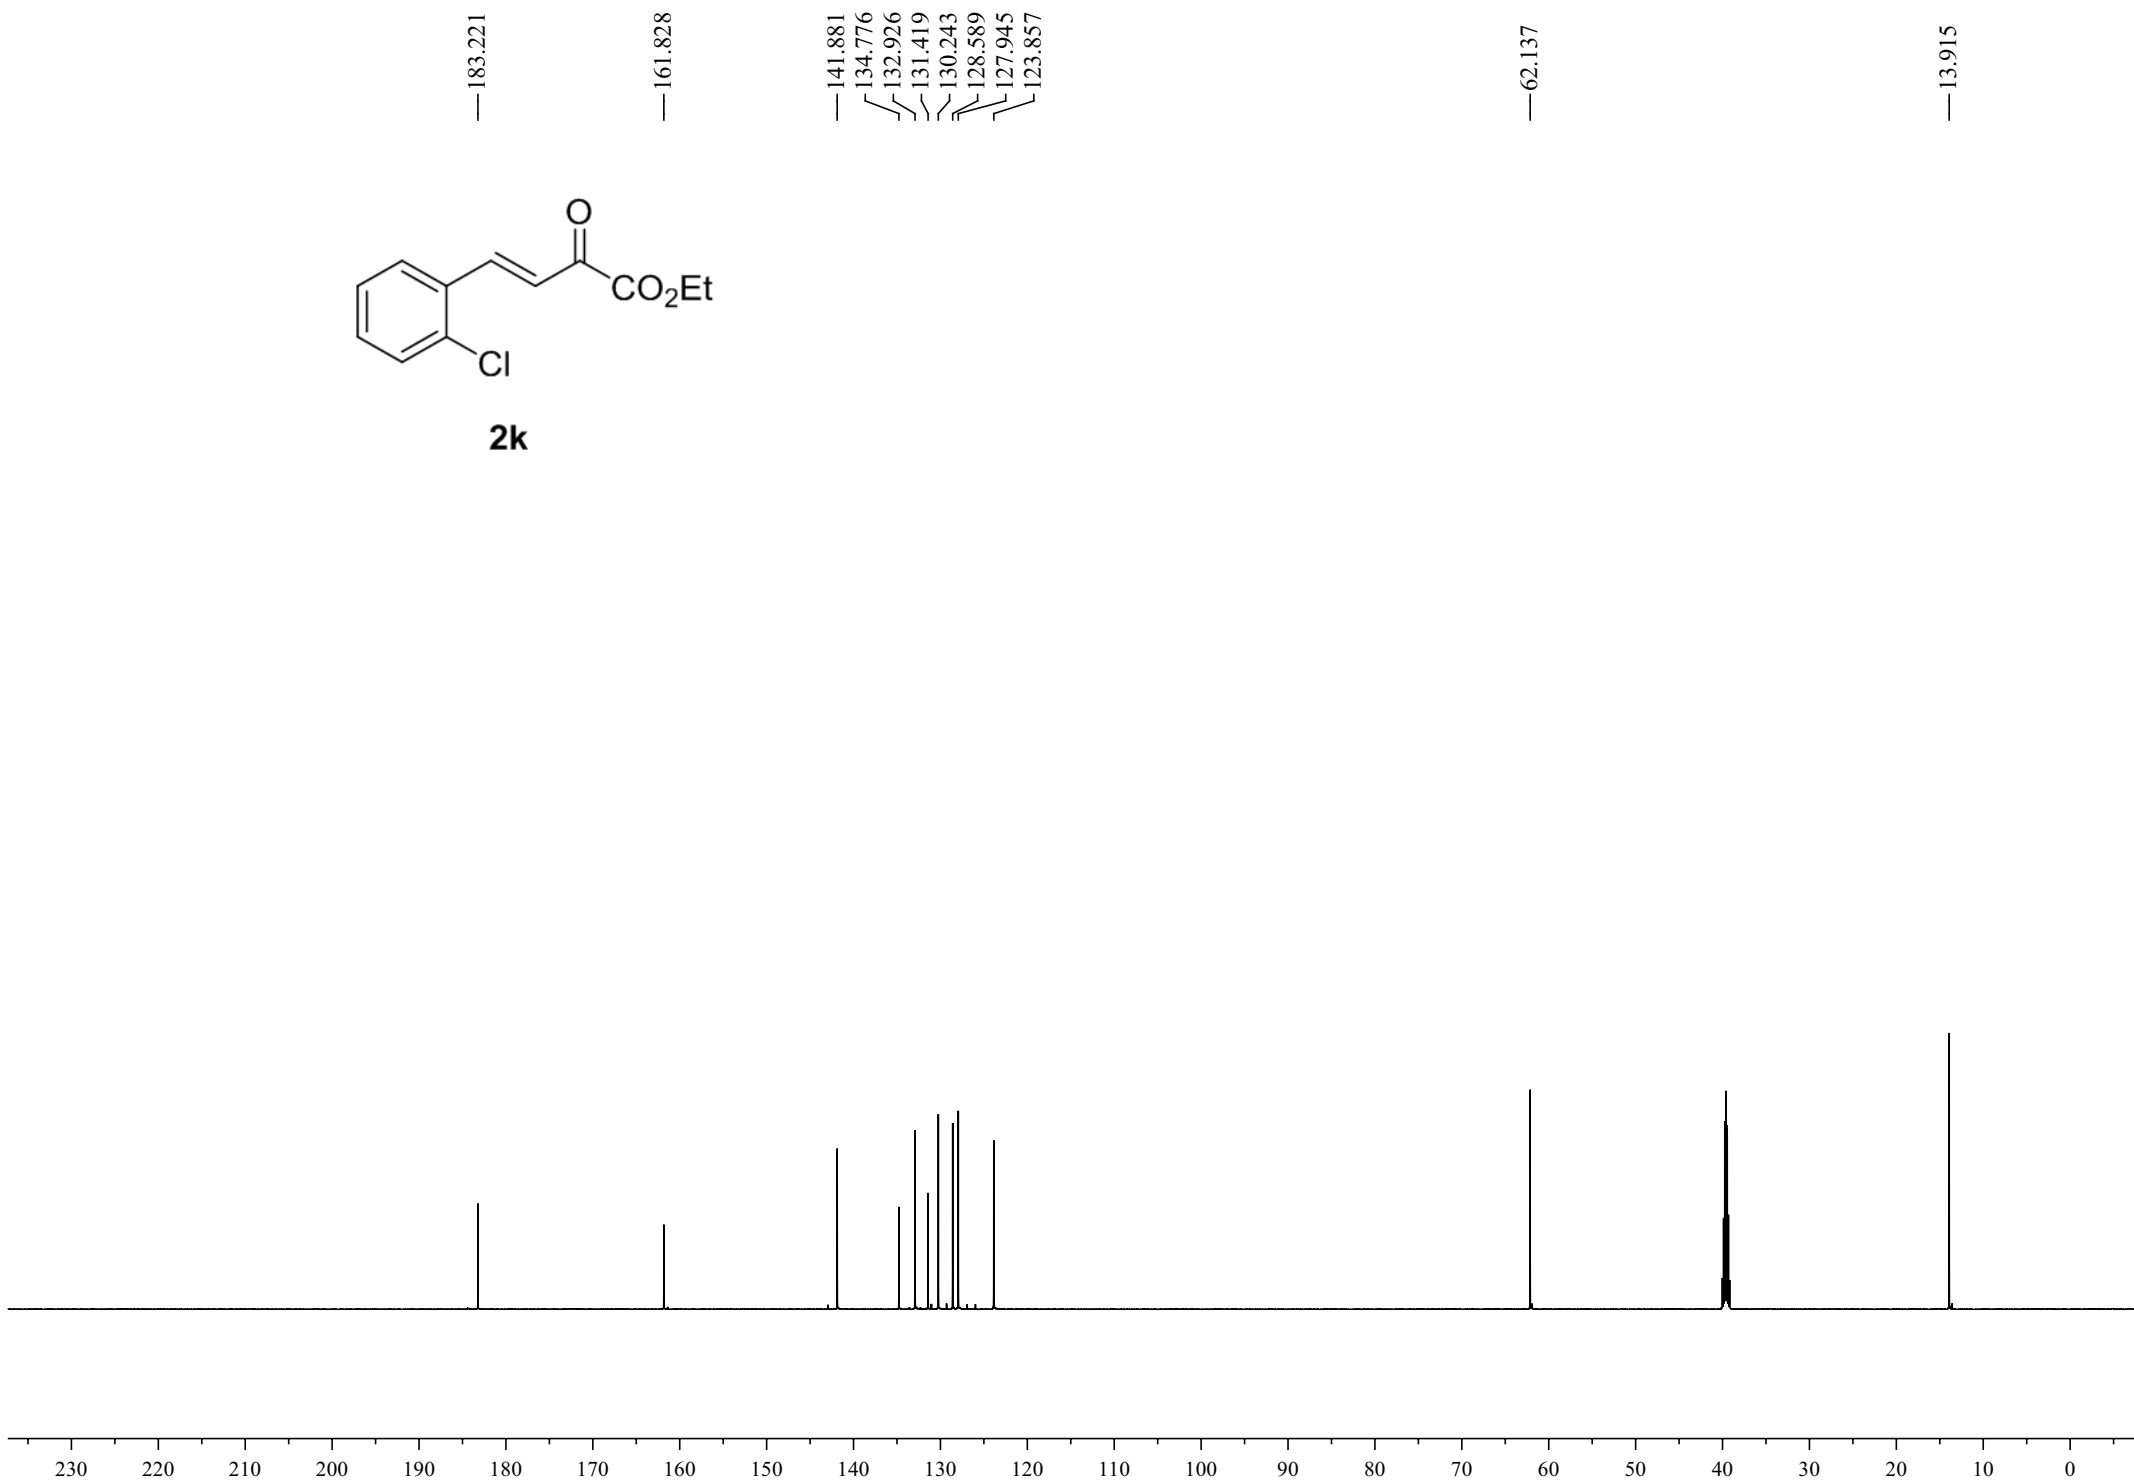

7.907  
7.771  
7.757  
7.730  
7.533  
7.513  
7.488  
7.468  
7.449  
7.411  
7.370

4.349  
4.331  
4.313  
4.295

1.328  
1.310  
1.293

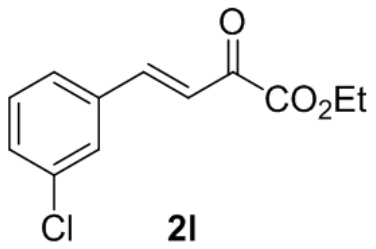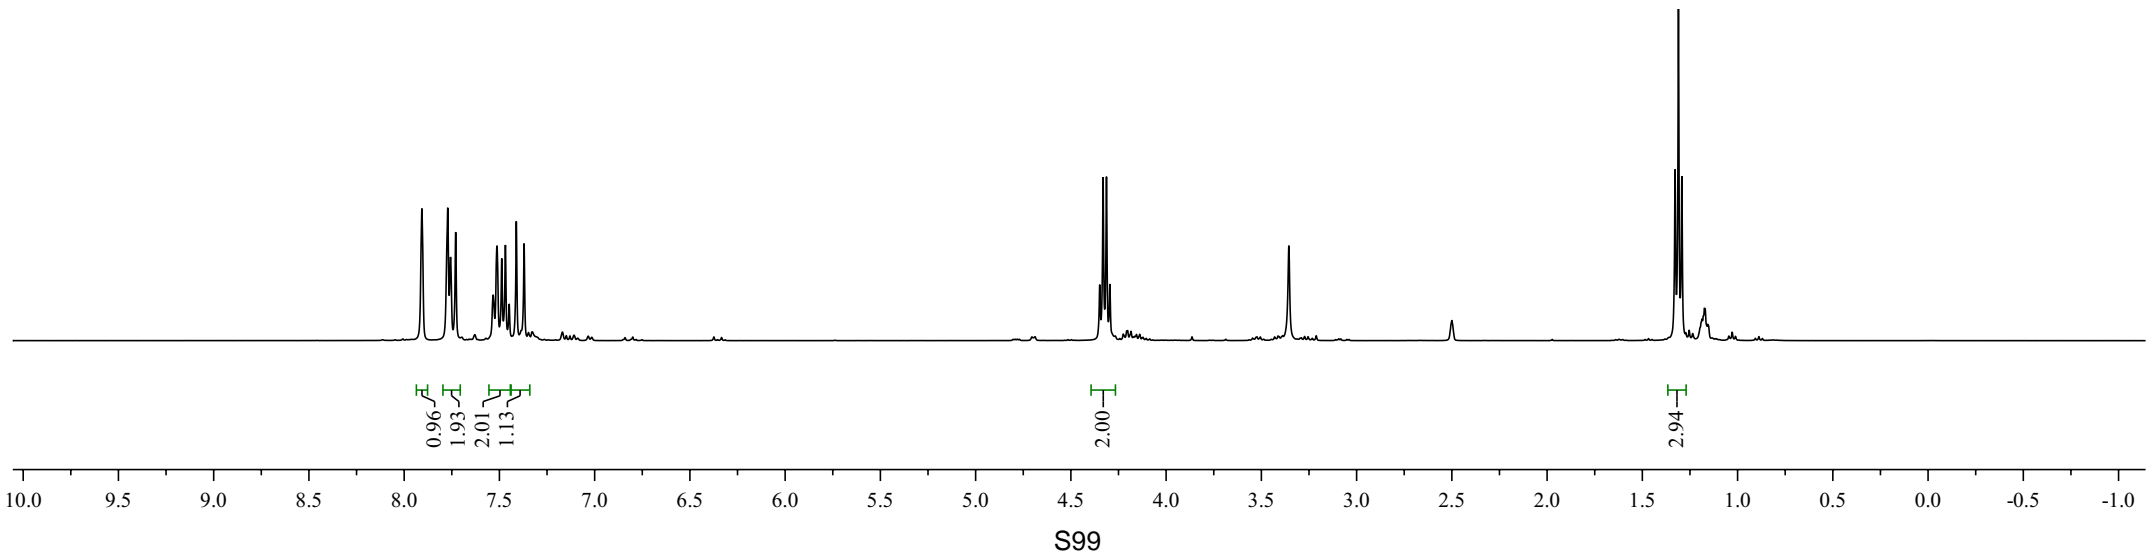

—183.847

—162.185

—146.111

136.033

133.985

131.141

130.886

128.722

127.666

122.800

—62.109

—13.894

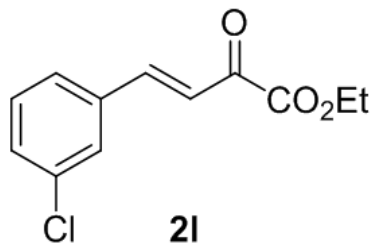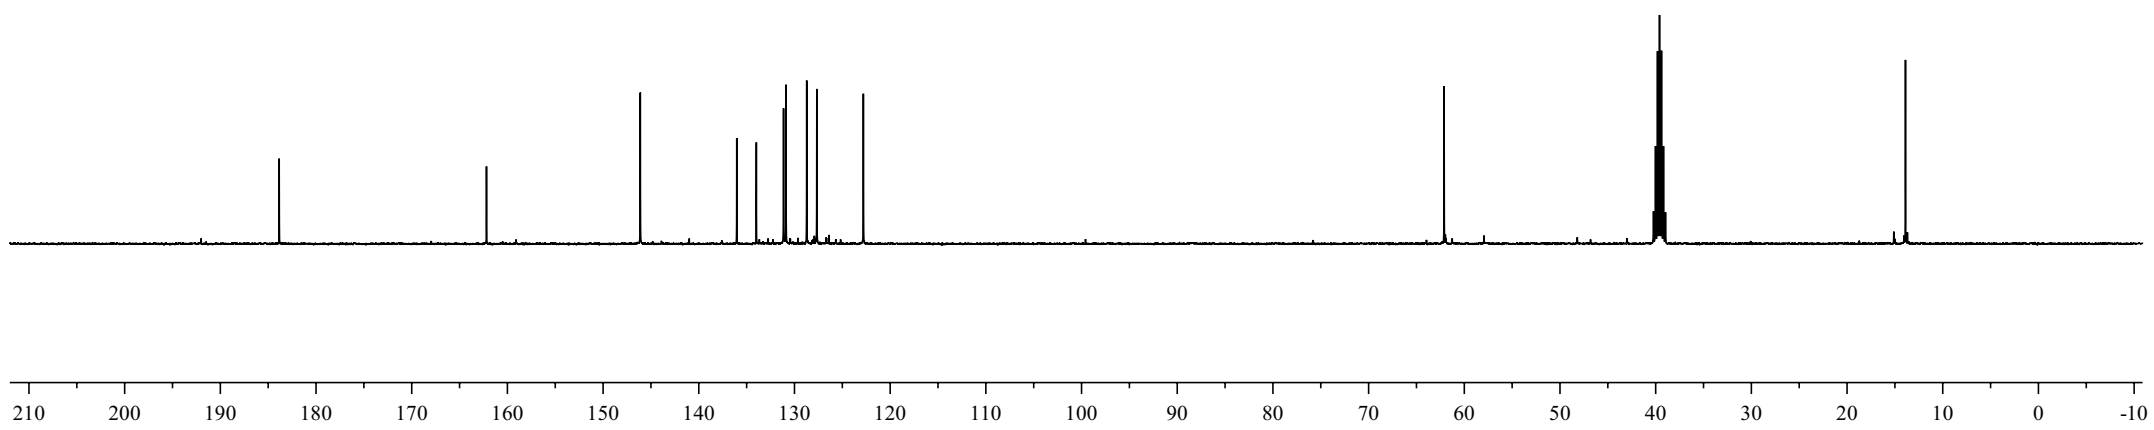

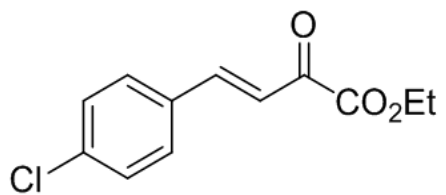

2m

7.803  
7.763  
7.566  
7.545  
7.392  
7.371  
7.362  
7.321

4.421  
4.403  
4.386  
4.368

1.429  
1.411  
1.393

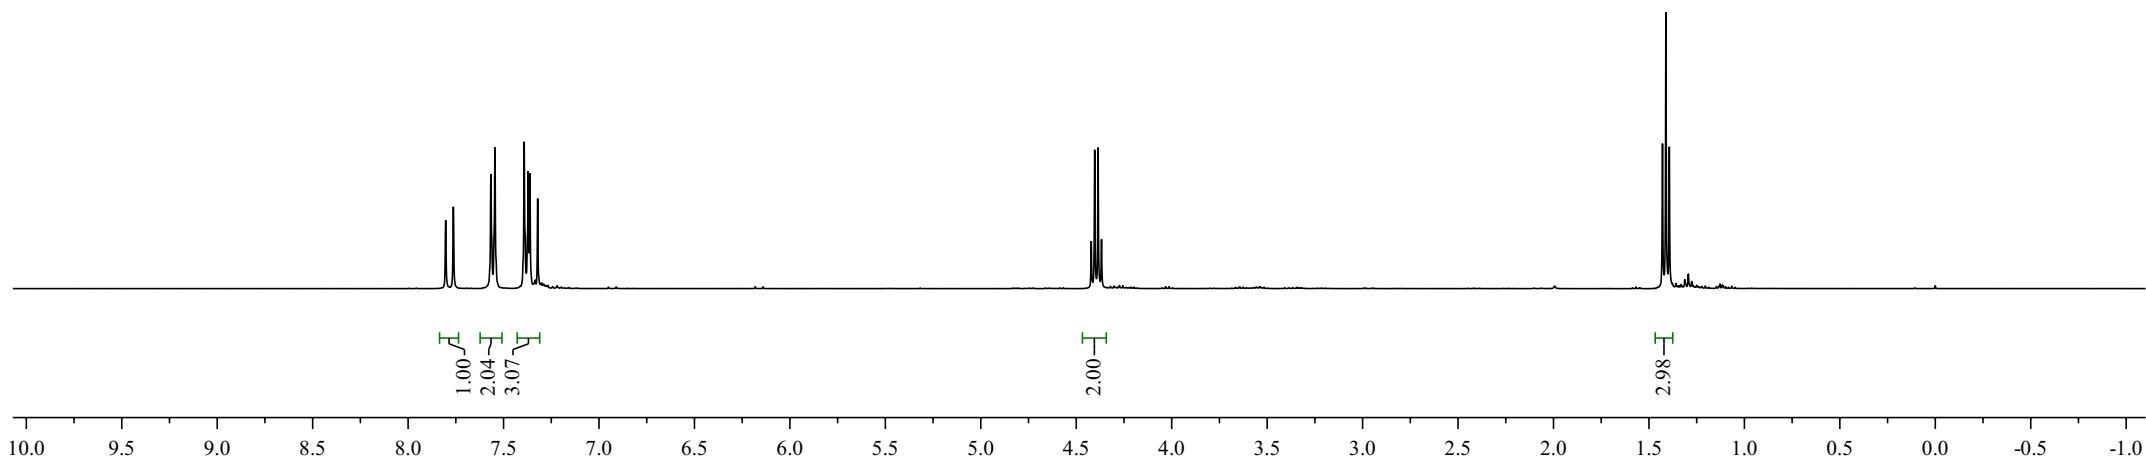

S101

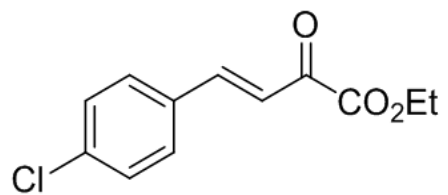

2m

—182.248

—161.739

—146.415

—137.316

—132.259

—129.937

—129.144

—120.636

—62.352

—13.832

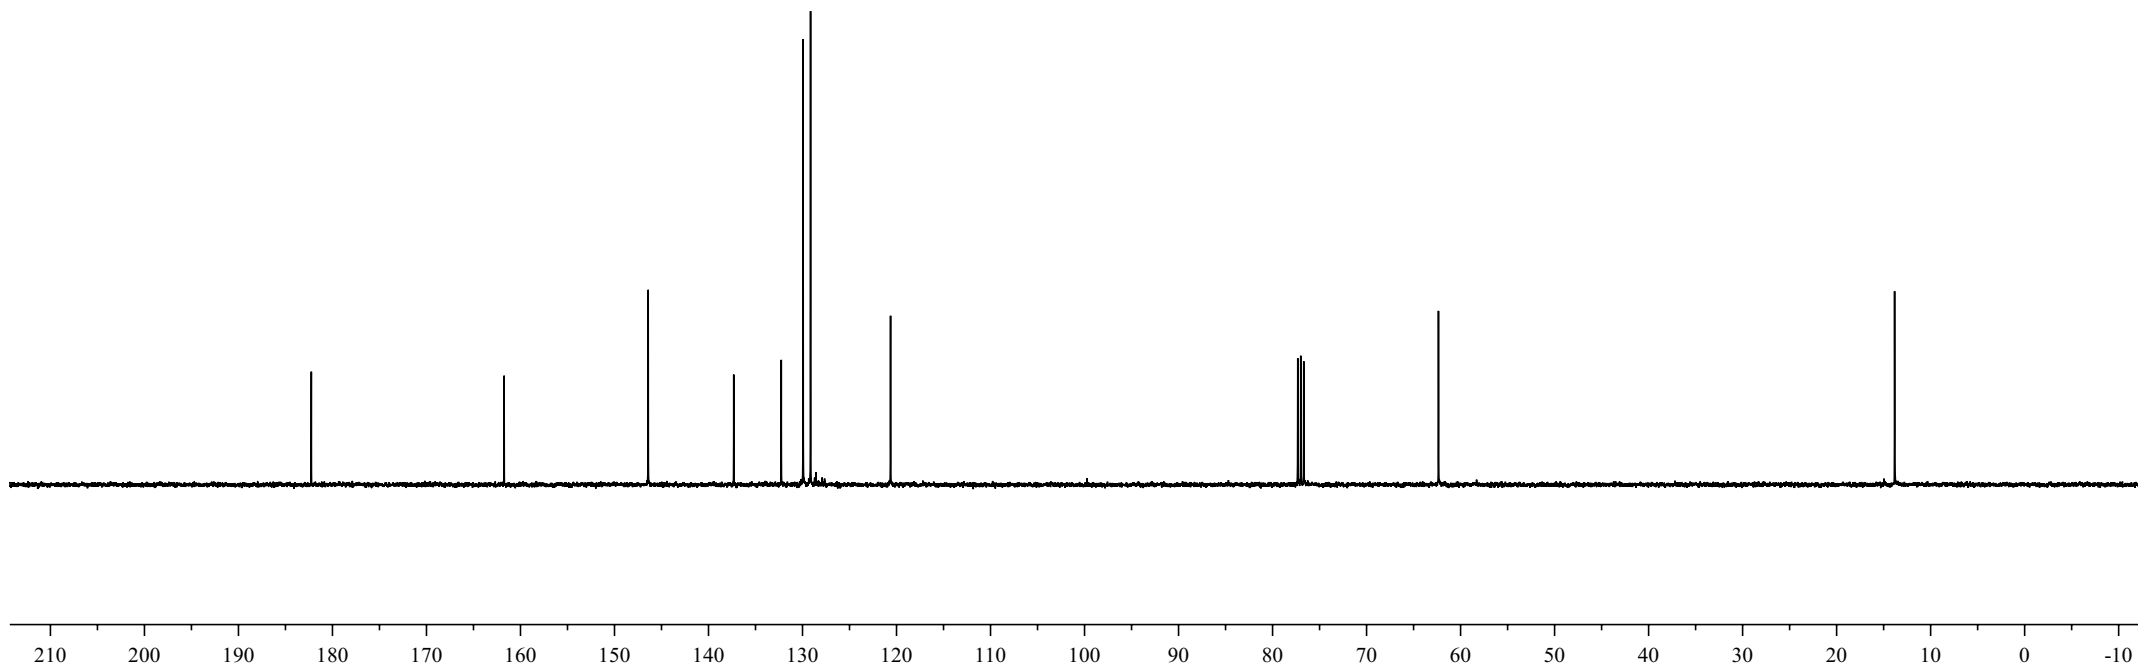

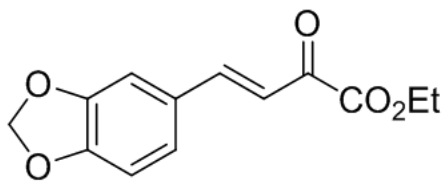

**2n**

7.791  
7.751  
7.210  
7.170  
7.140  
7.121  
6.856  
6.835  
—6.041

4.412  
4.394  
4.377  
4.359

1.427  
1.409  
1.391

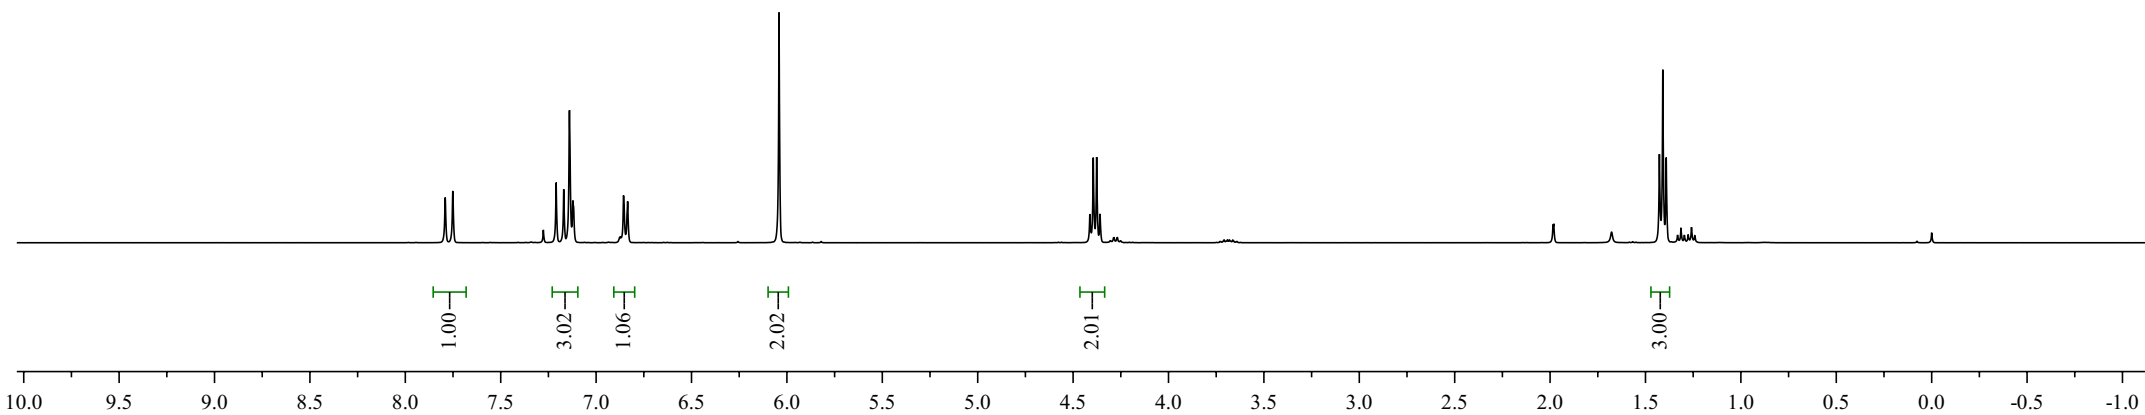

— 182.524

— 162.342

— 150.901

— 148.539

— 148.167

— 128.565

— 126.497

— 118.526

— 108.721

— 106.865

— 101.815

— 62.371

— 14.022

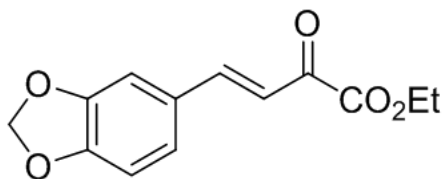

**2n**

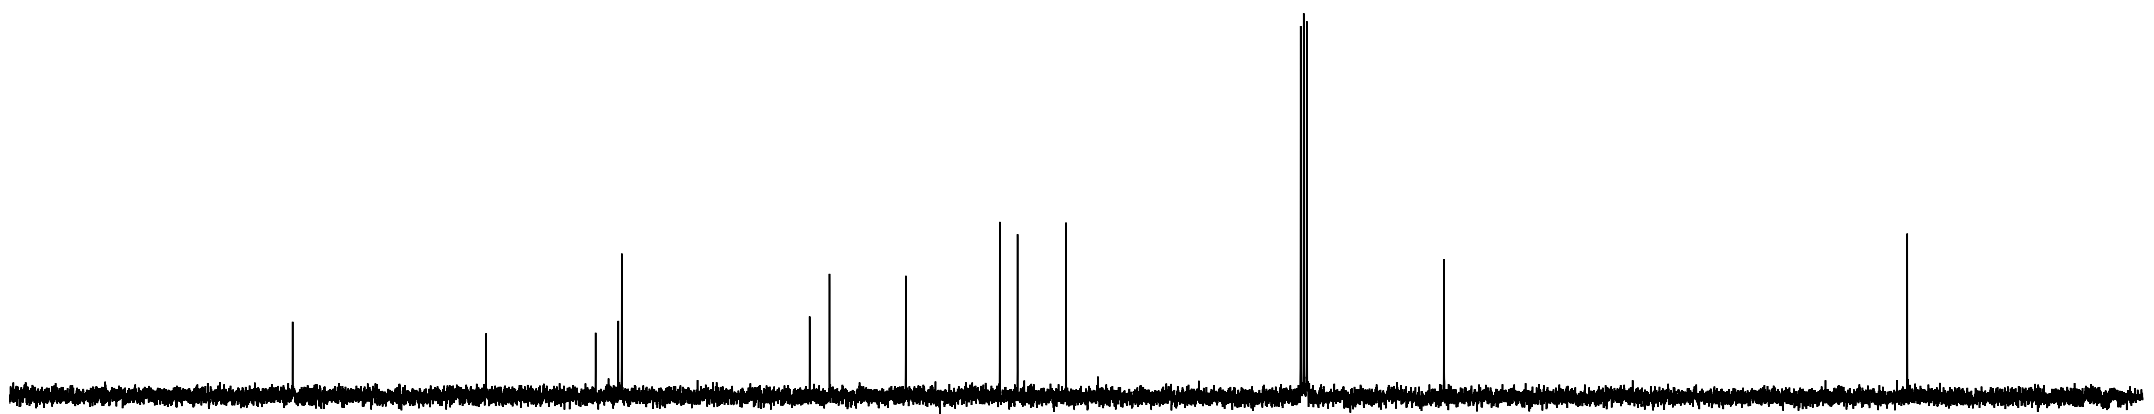

210 200 190 180 170 160 150 140 130 120 110 100 90 80 70 60 50 40 30 20 10 0 -10

S104



8.037  
8.009  
7.887  
7.874  
7.866  
7.852  
7.837  
7.761  
7.759  
7.747  
7.745  
7.568  
7.567  
7.557  
7.555  
7.544  
7.542  
7.539  
7.528  
7.517  
7.487  
7.460

4.435  
4.423  
4.411  
4.399

1.444  
1.432  
1.420

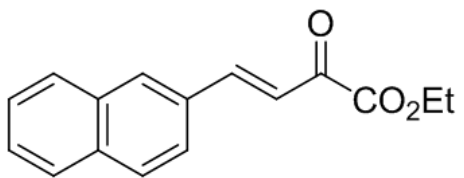

2o

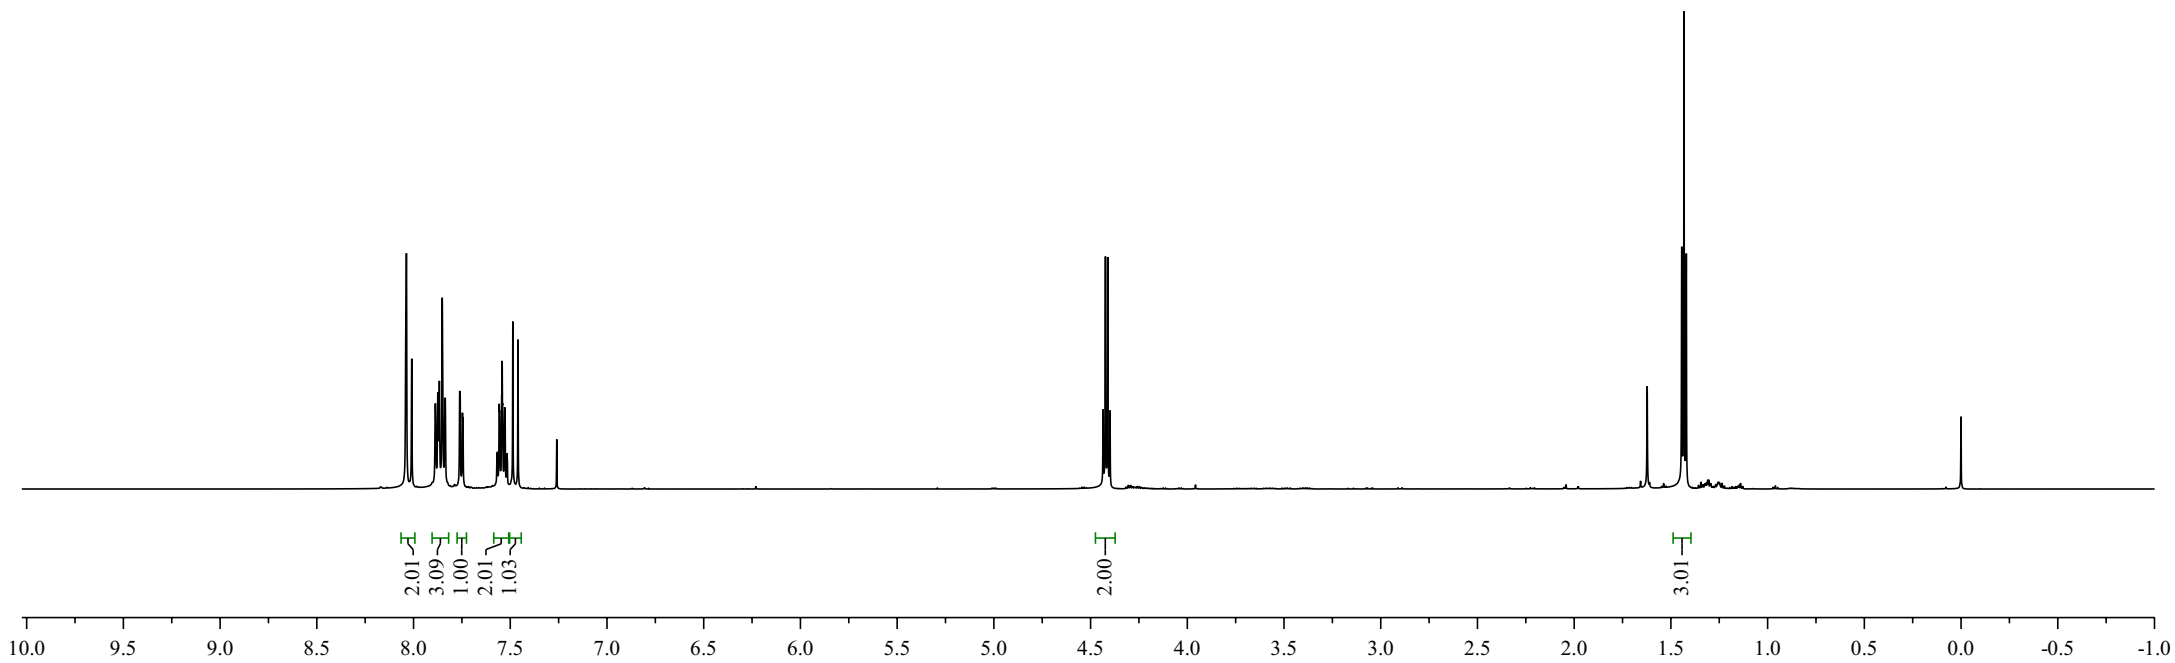

S105

—182.746

—162.269

—148.469

134.829

133.178

131.942

131.557

128.913

128.857

127.954

127.828

126.924

123.556

120.582

—62.512

—14.066

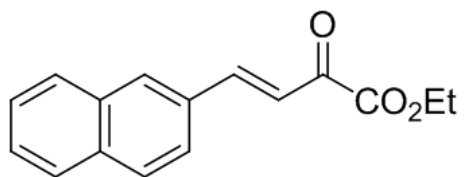

**2o**

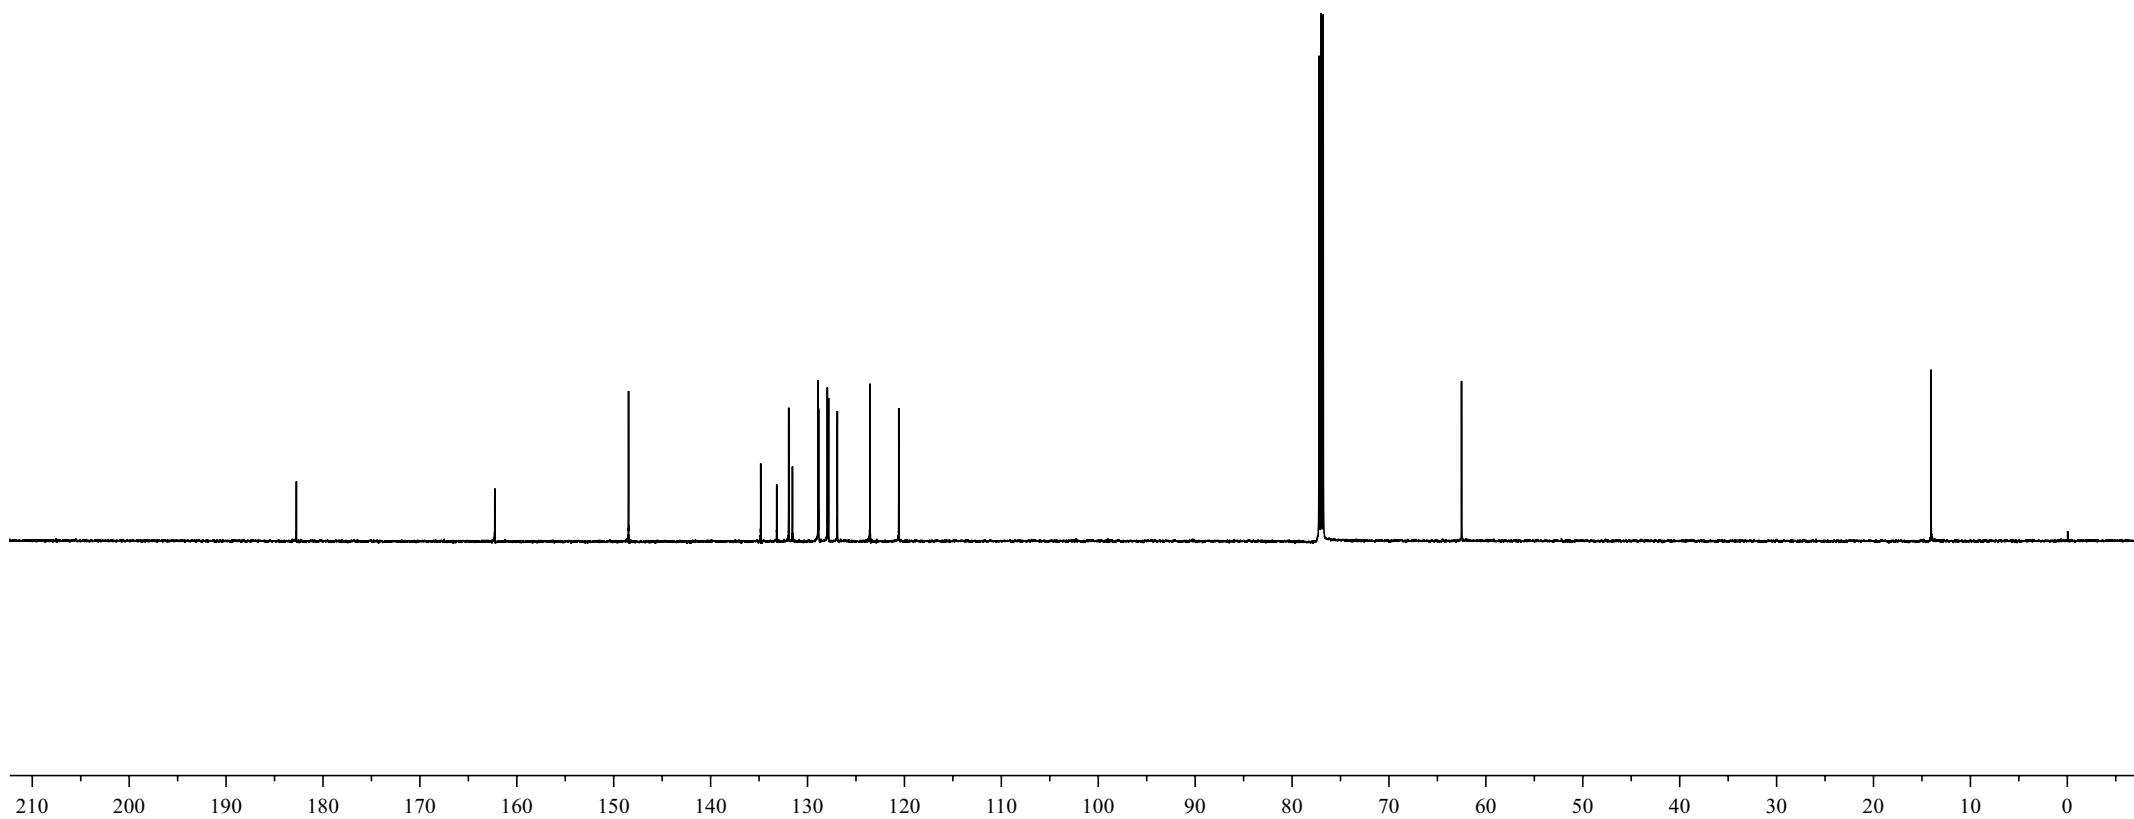

S106

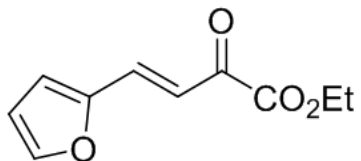

2p

7.961  
7.960  
7.959  
7.620  
7.593  
7.180  
7.174  
7.019  
6.993  
6.717  
6.714  
6.711  
6.708

4.309  
4.297  
4.285  
4.274

1.307  
1.295  
1.283

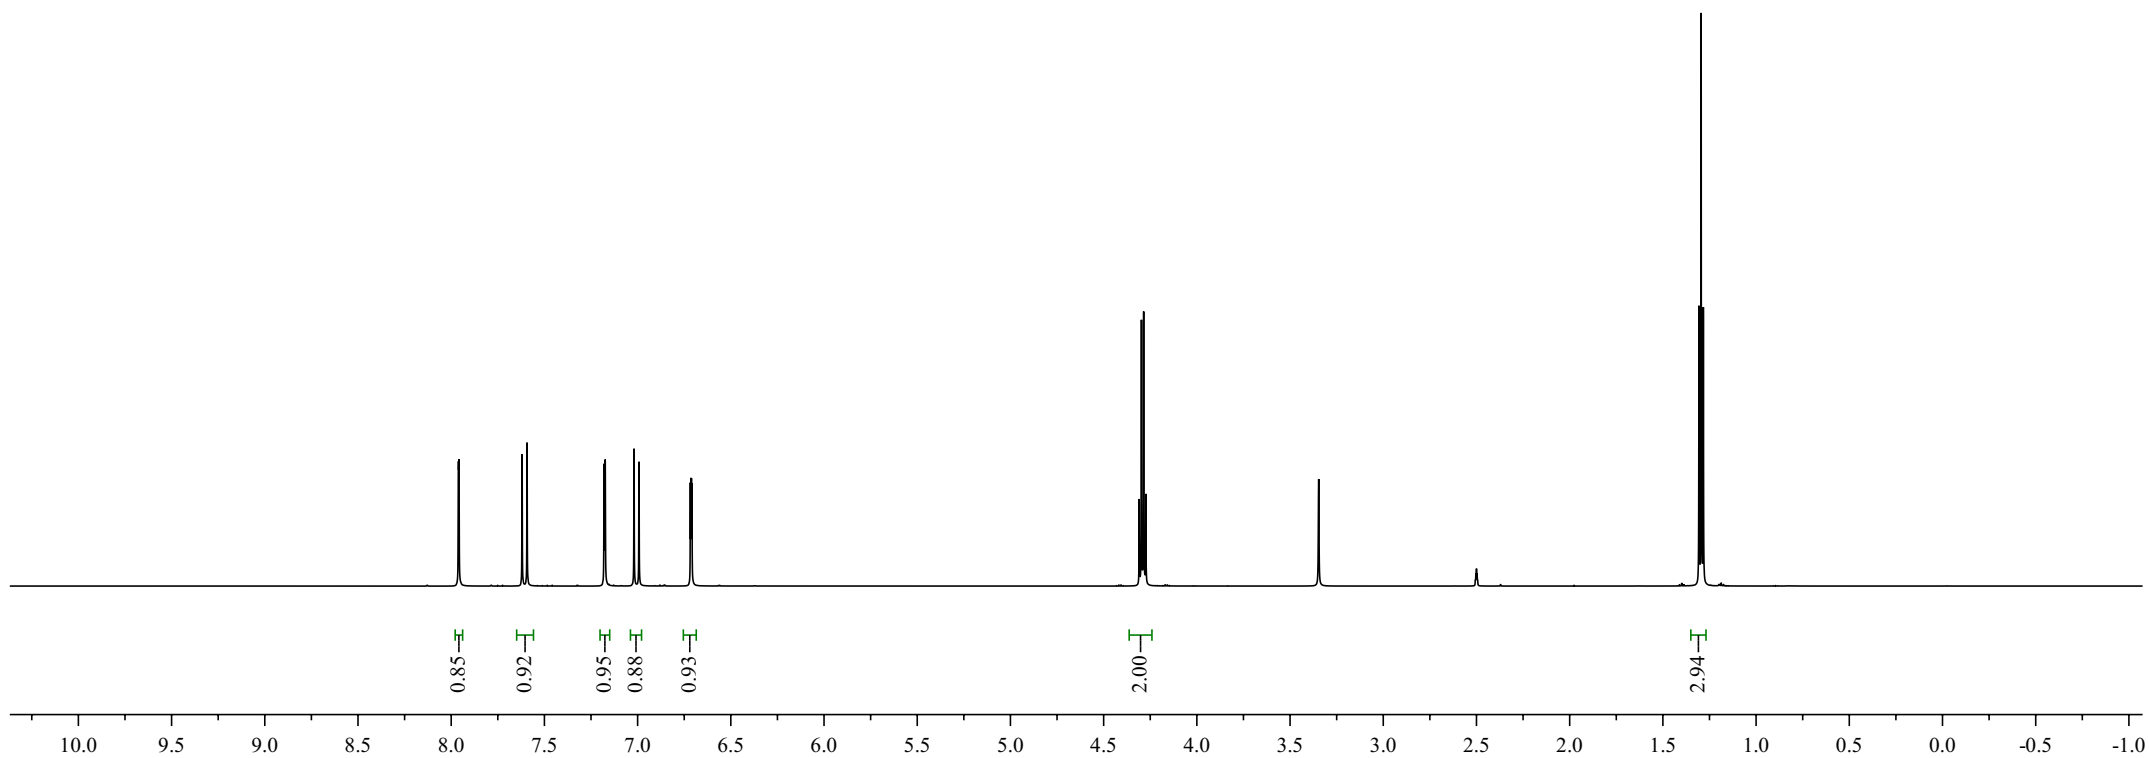

S107



2p

—182.536

—161.933

—150.435

—147.585

—133.297

—119.660

—117.578

—113.606

—61.930

—13.814

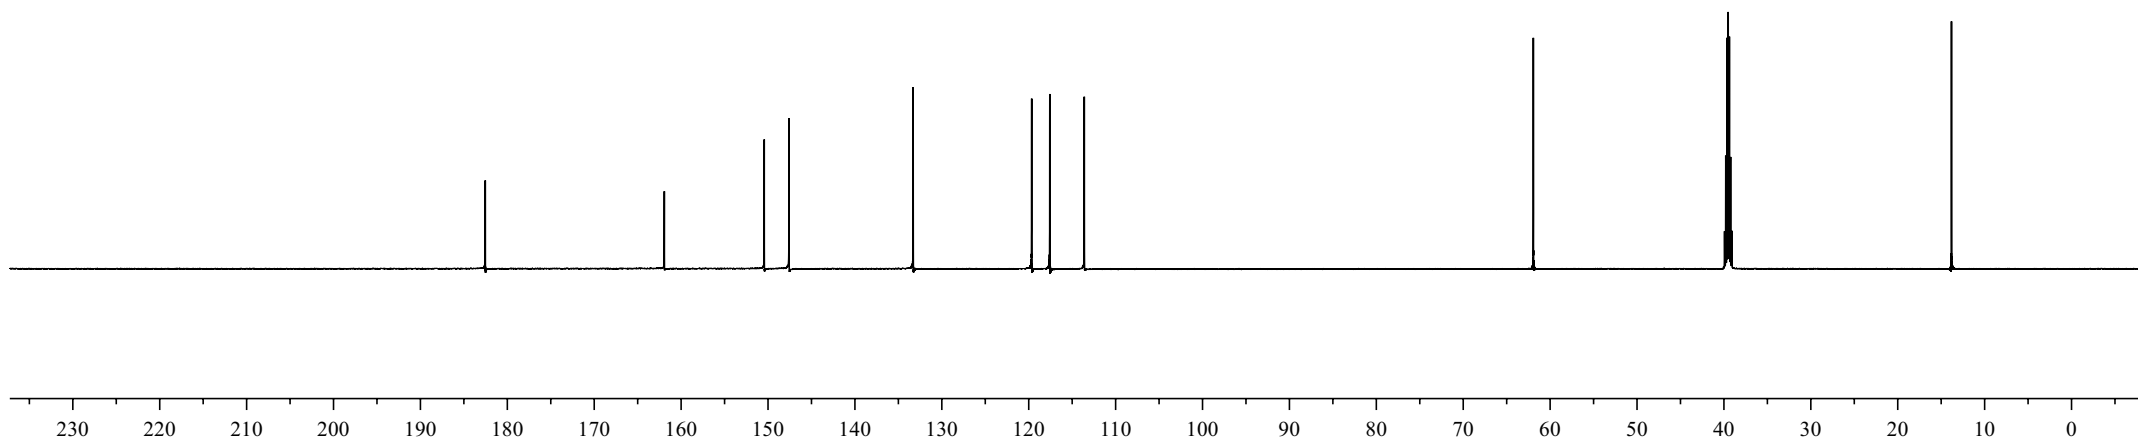

7.996  
7.956  
7.880  
7.868  
7.723  
7.714  
7.226  
7.216  
7.213  
7.204  
7.016  
6.977

4.326  
4.308  
4.290  
4.272

1.316  
1.298  
1.280

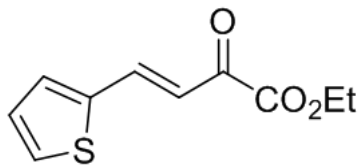

2q

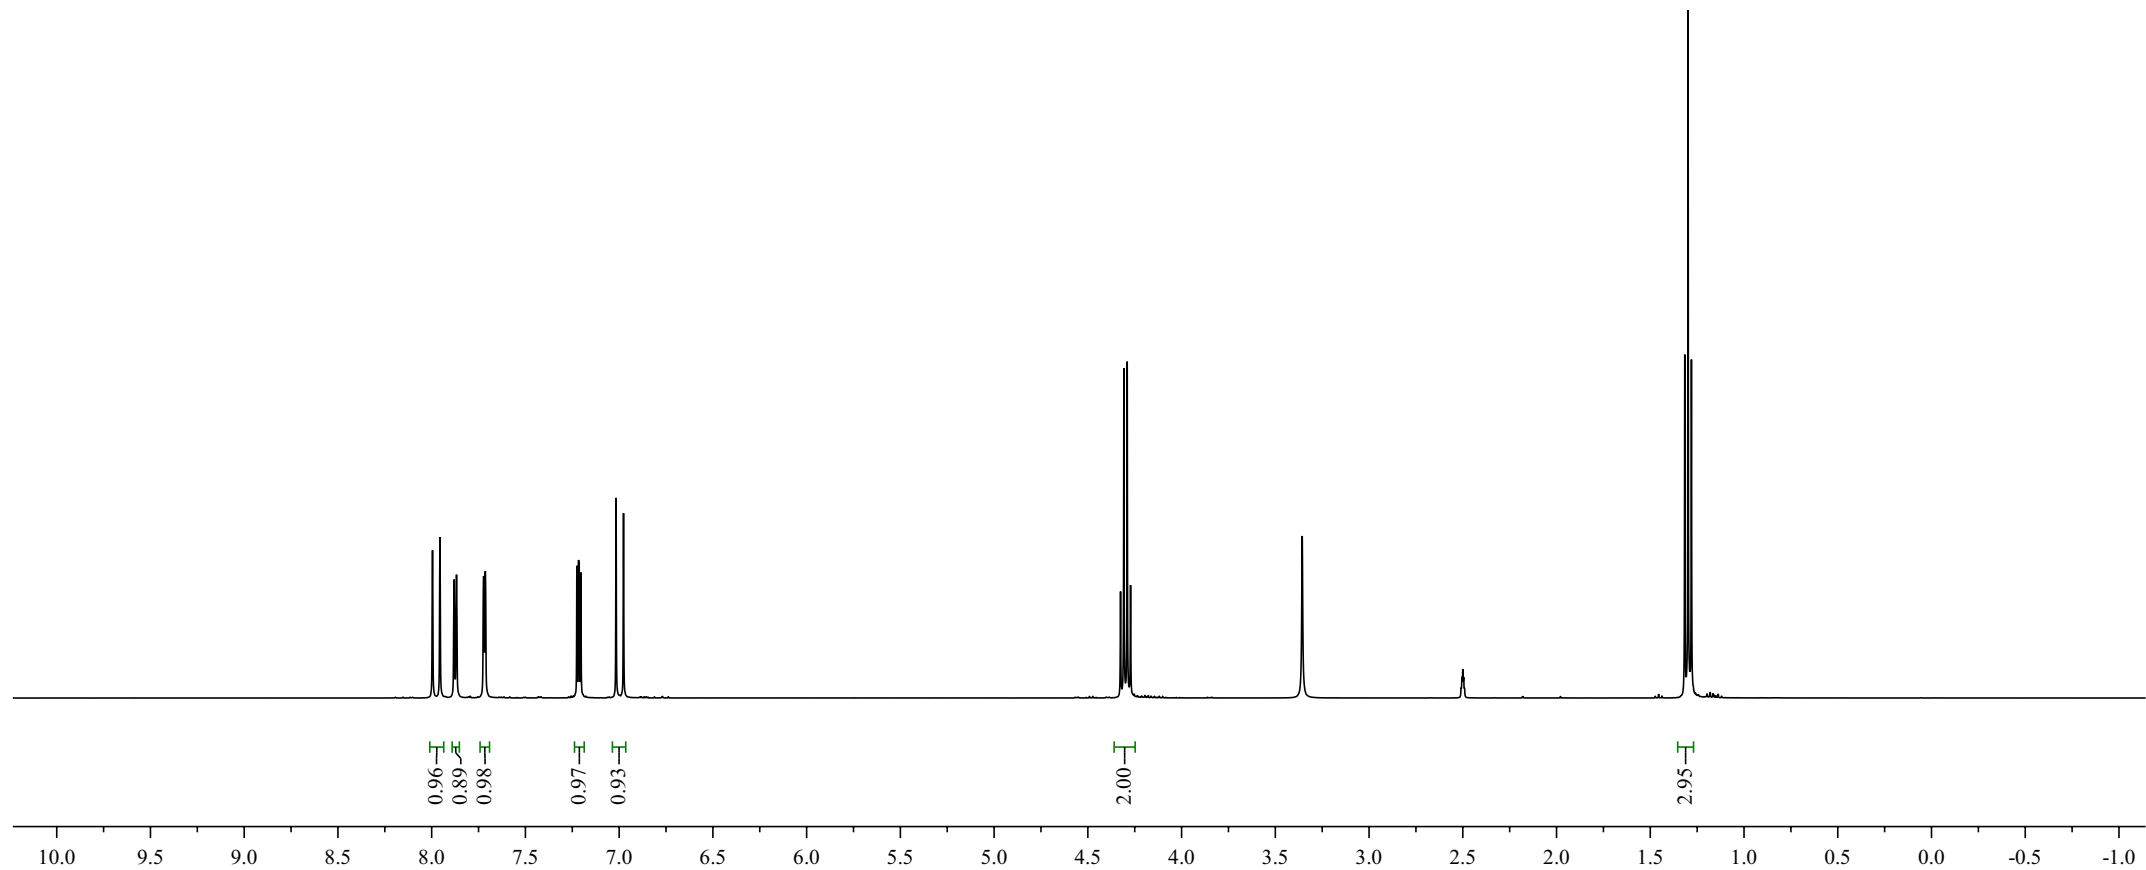

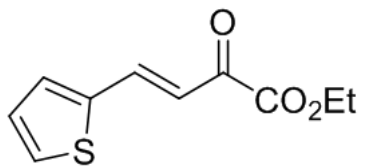

2q

—182.822

—162.226

~140.365

~139.106

—134.860

~132.383

~129.241

—119.367

—62.039

40.227

40.018

39.809

39.600

39.392

39.183

38.974

—13.918

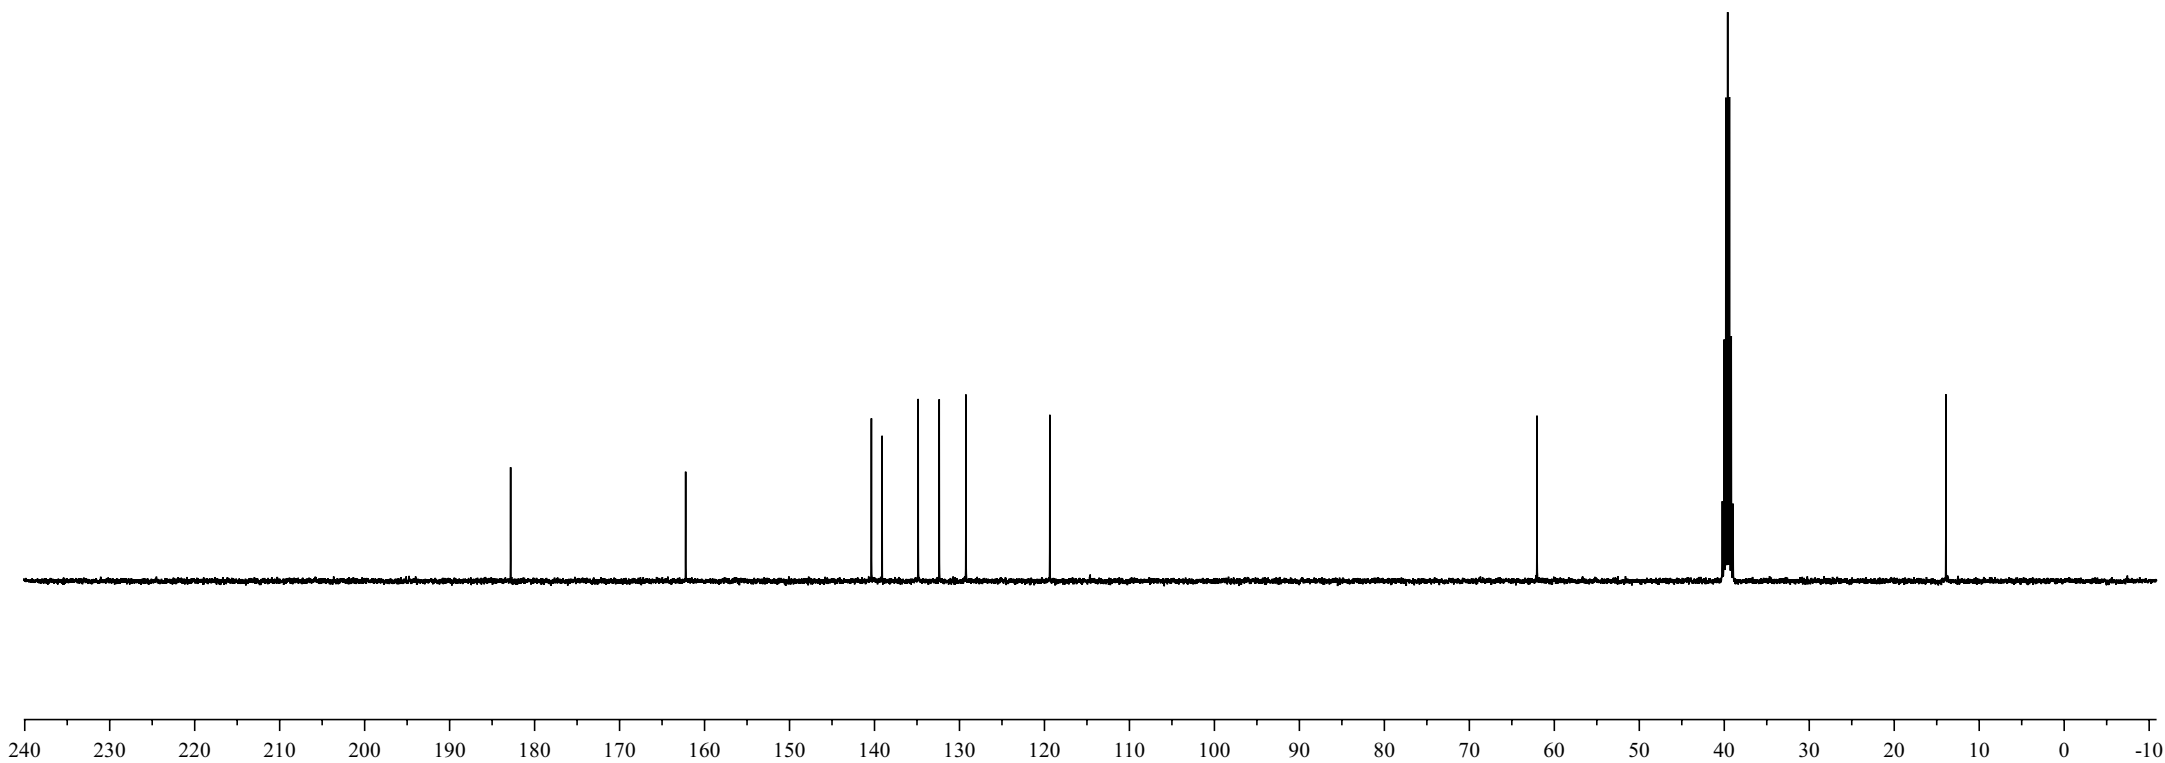

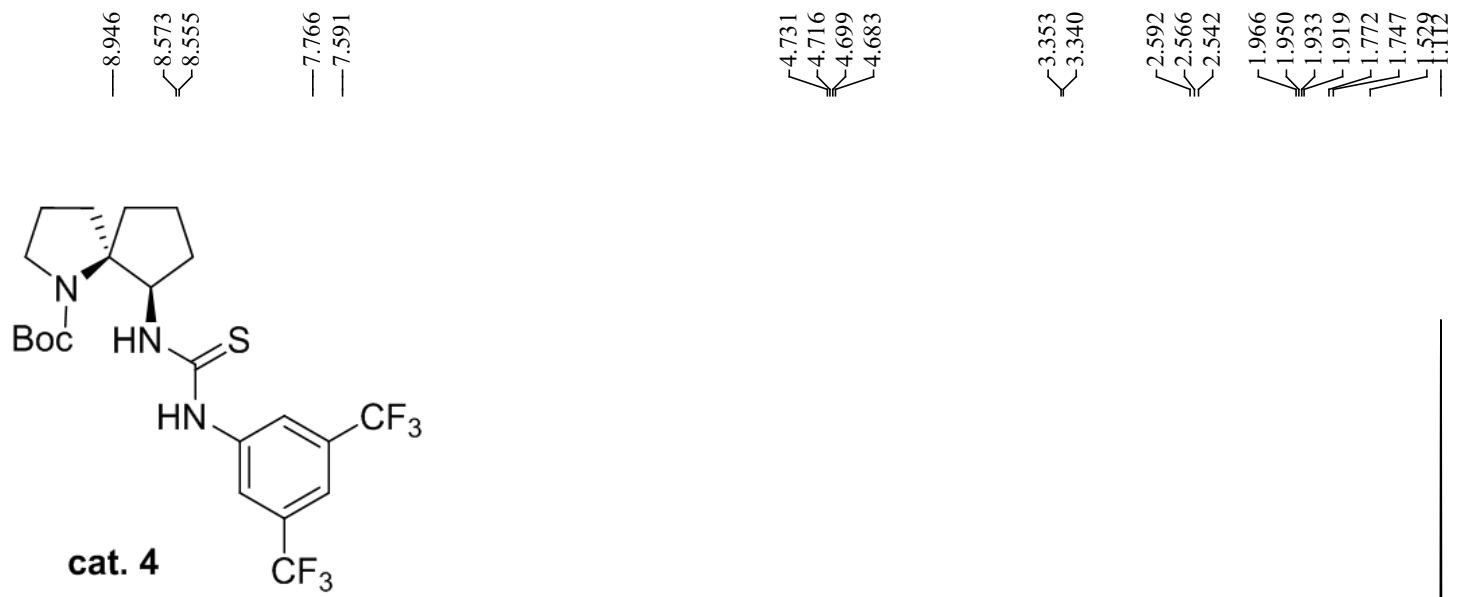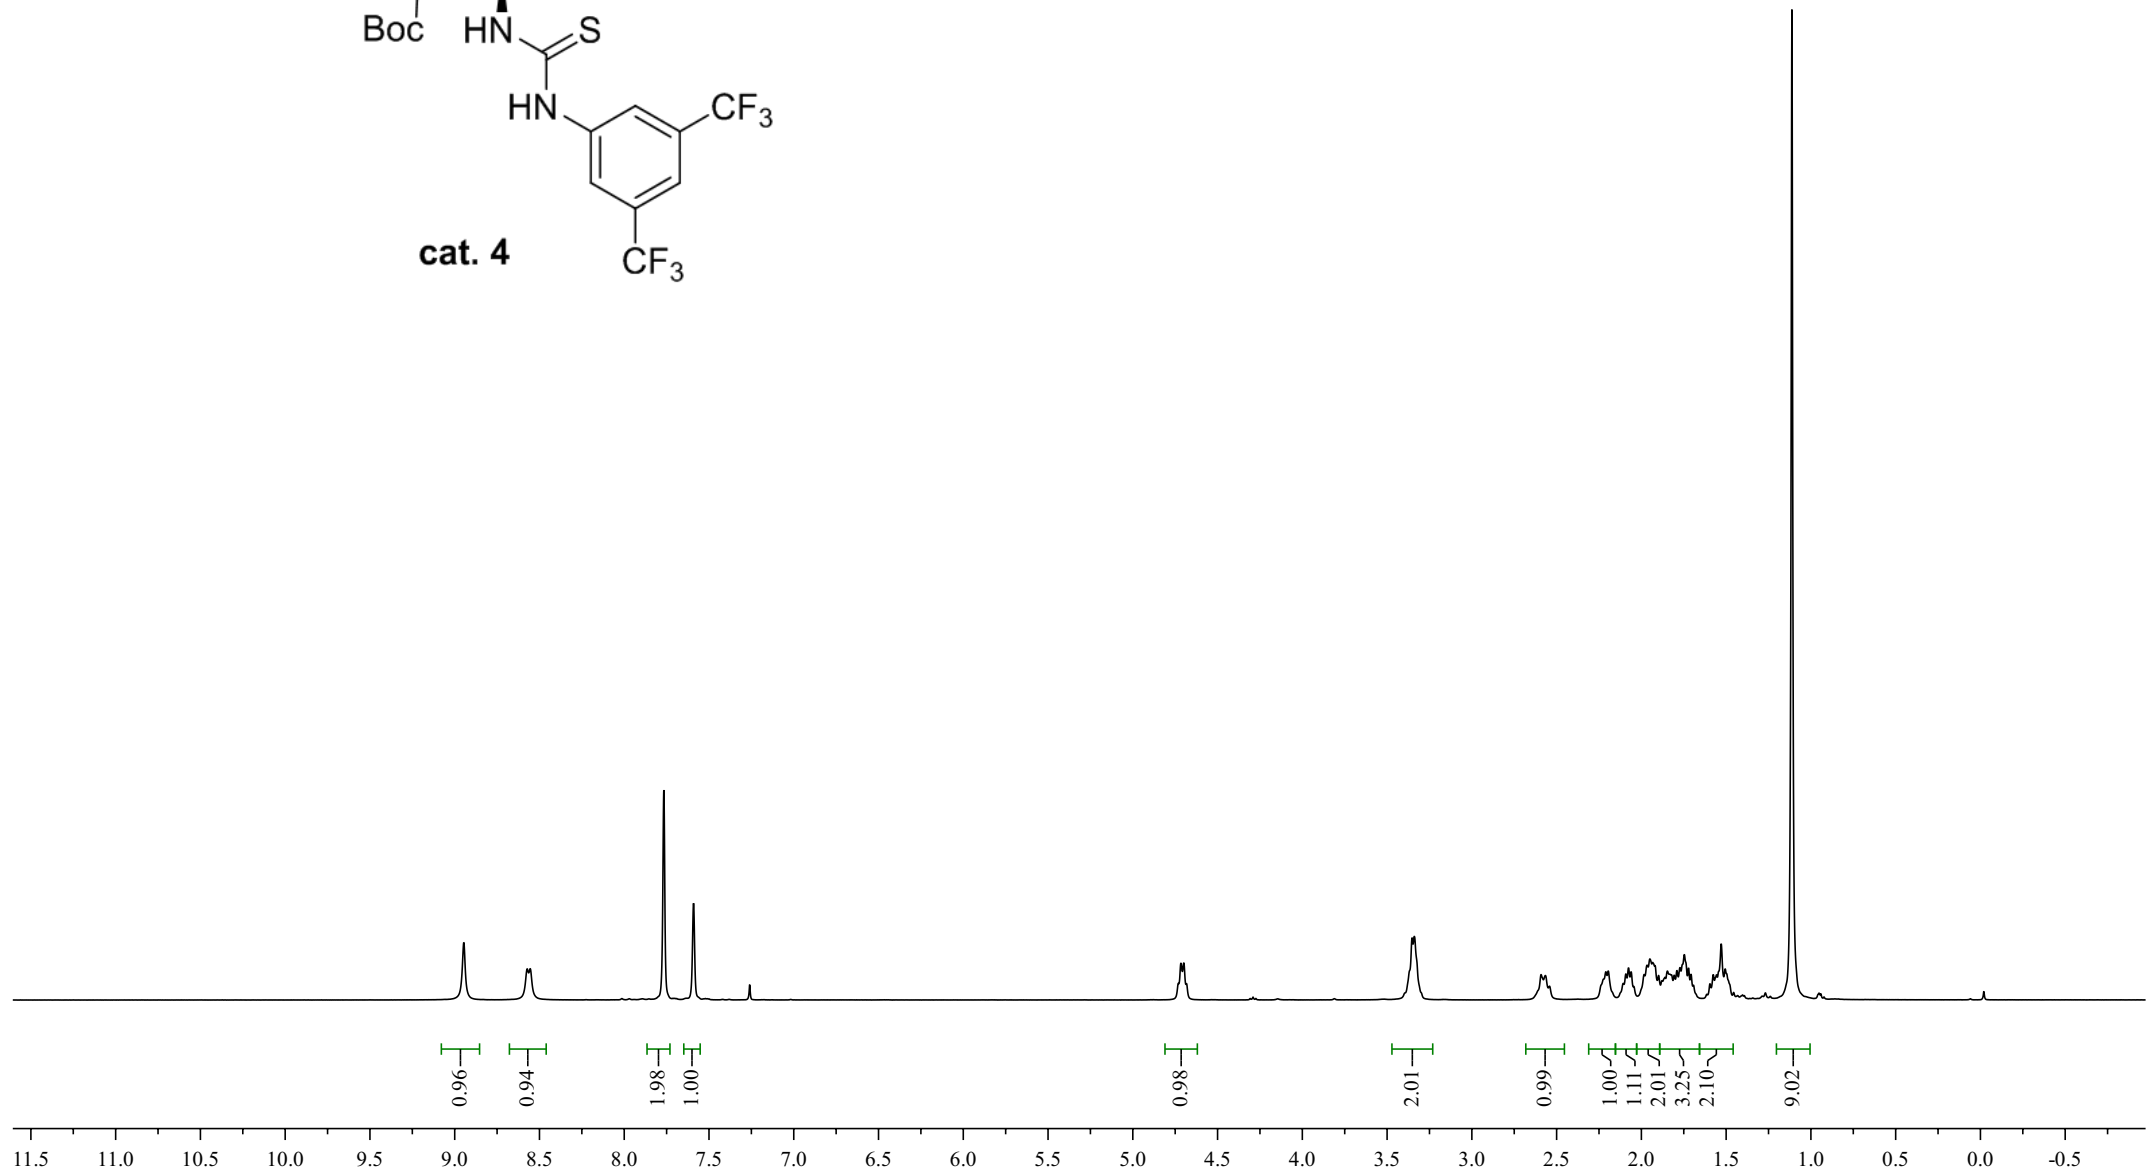

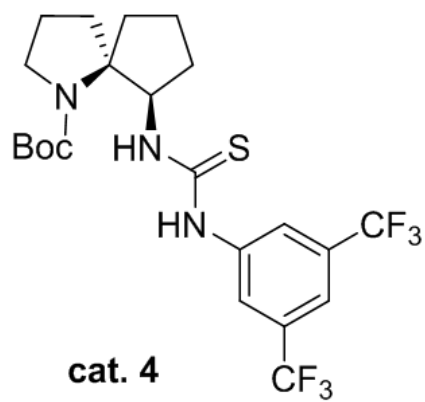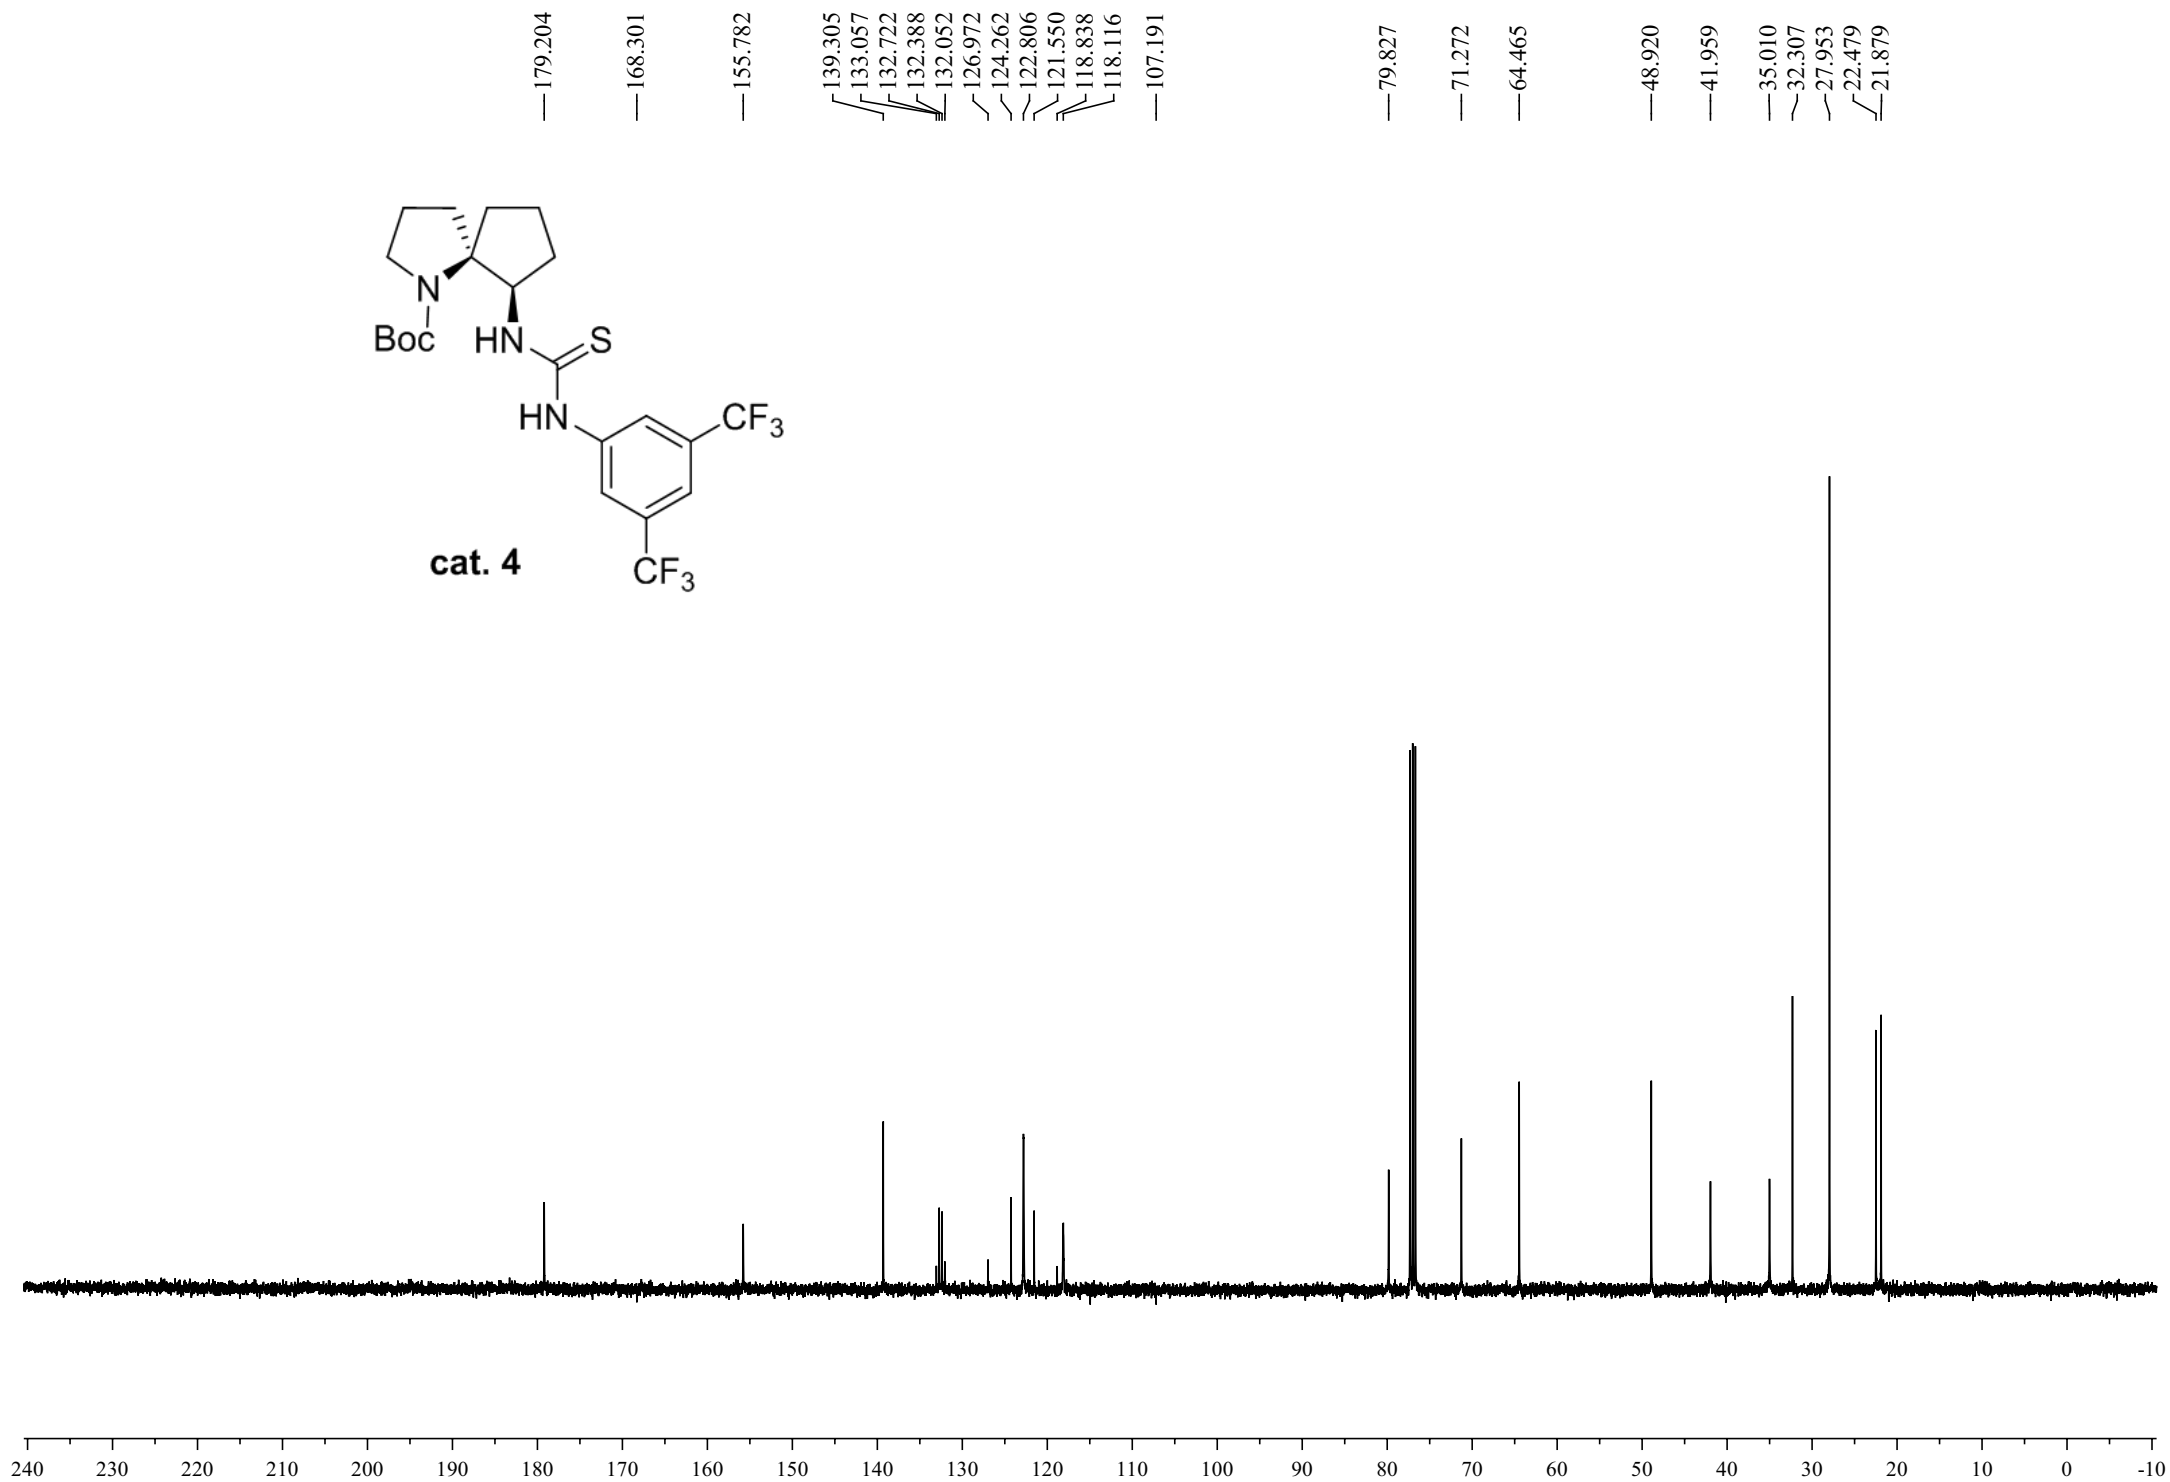



—63.185

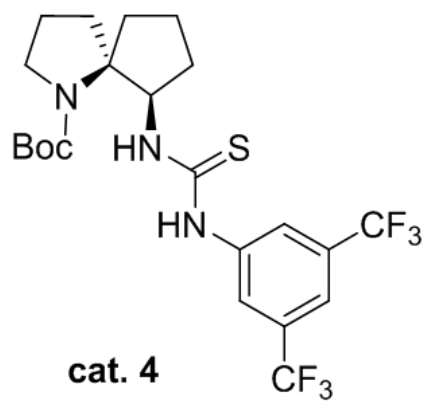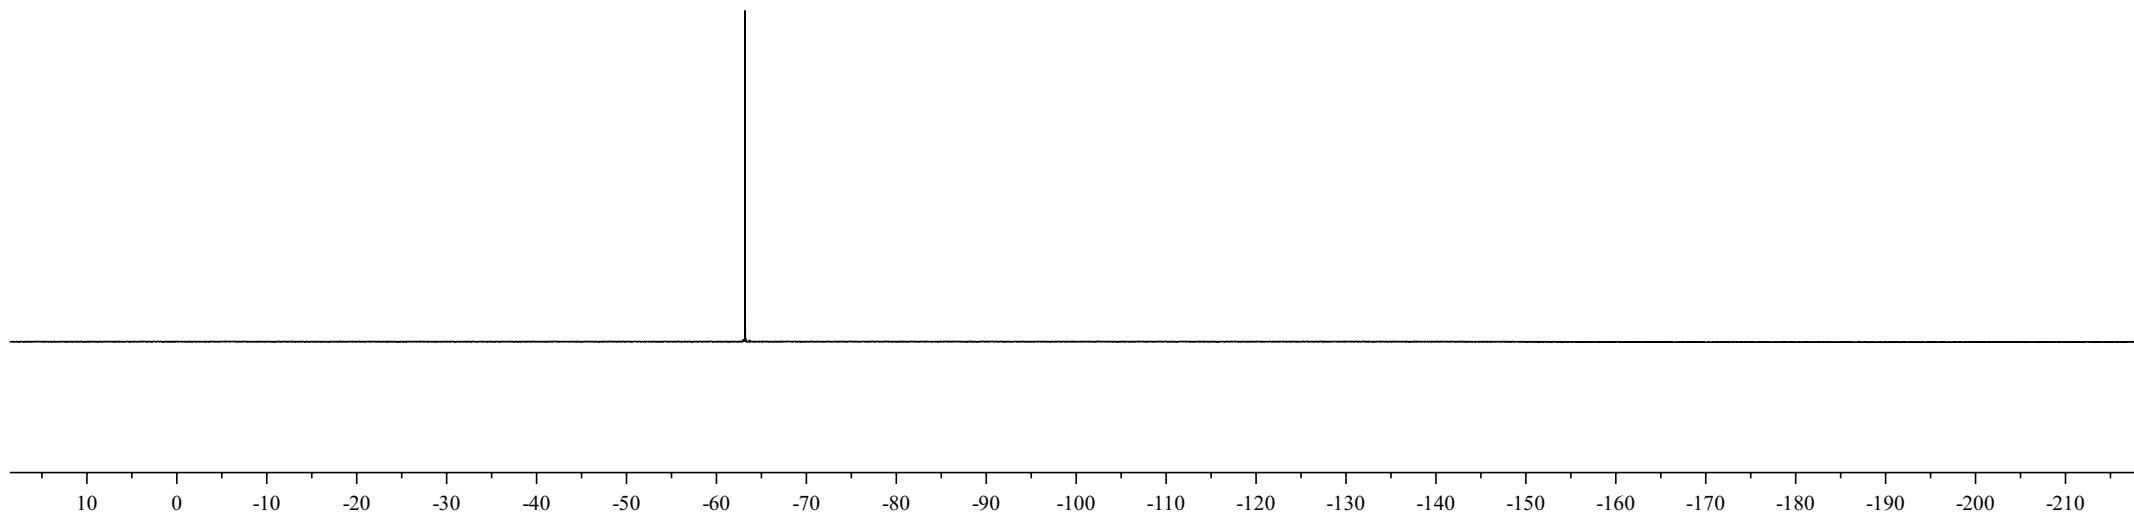

S113

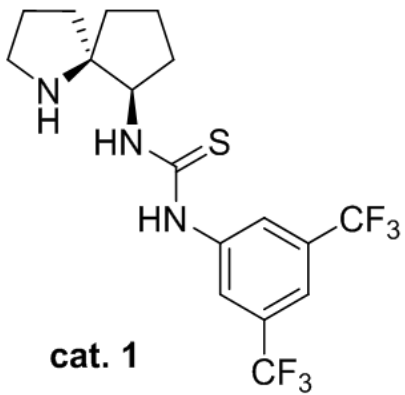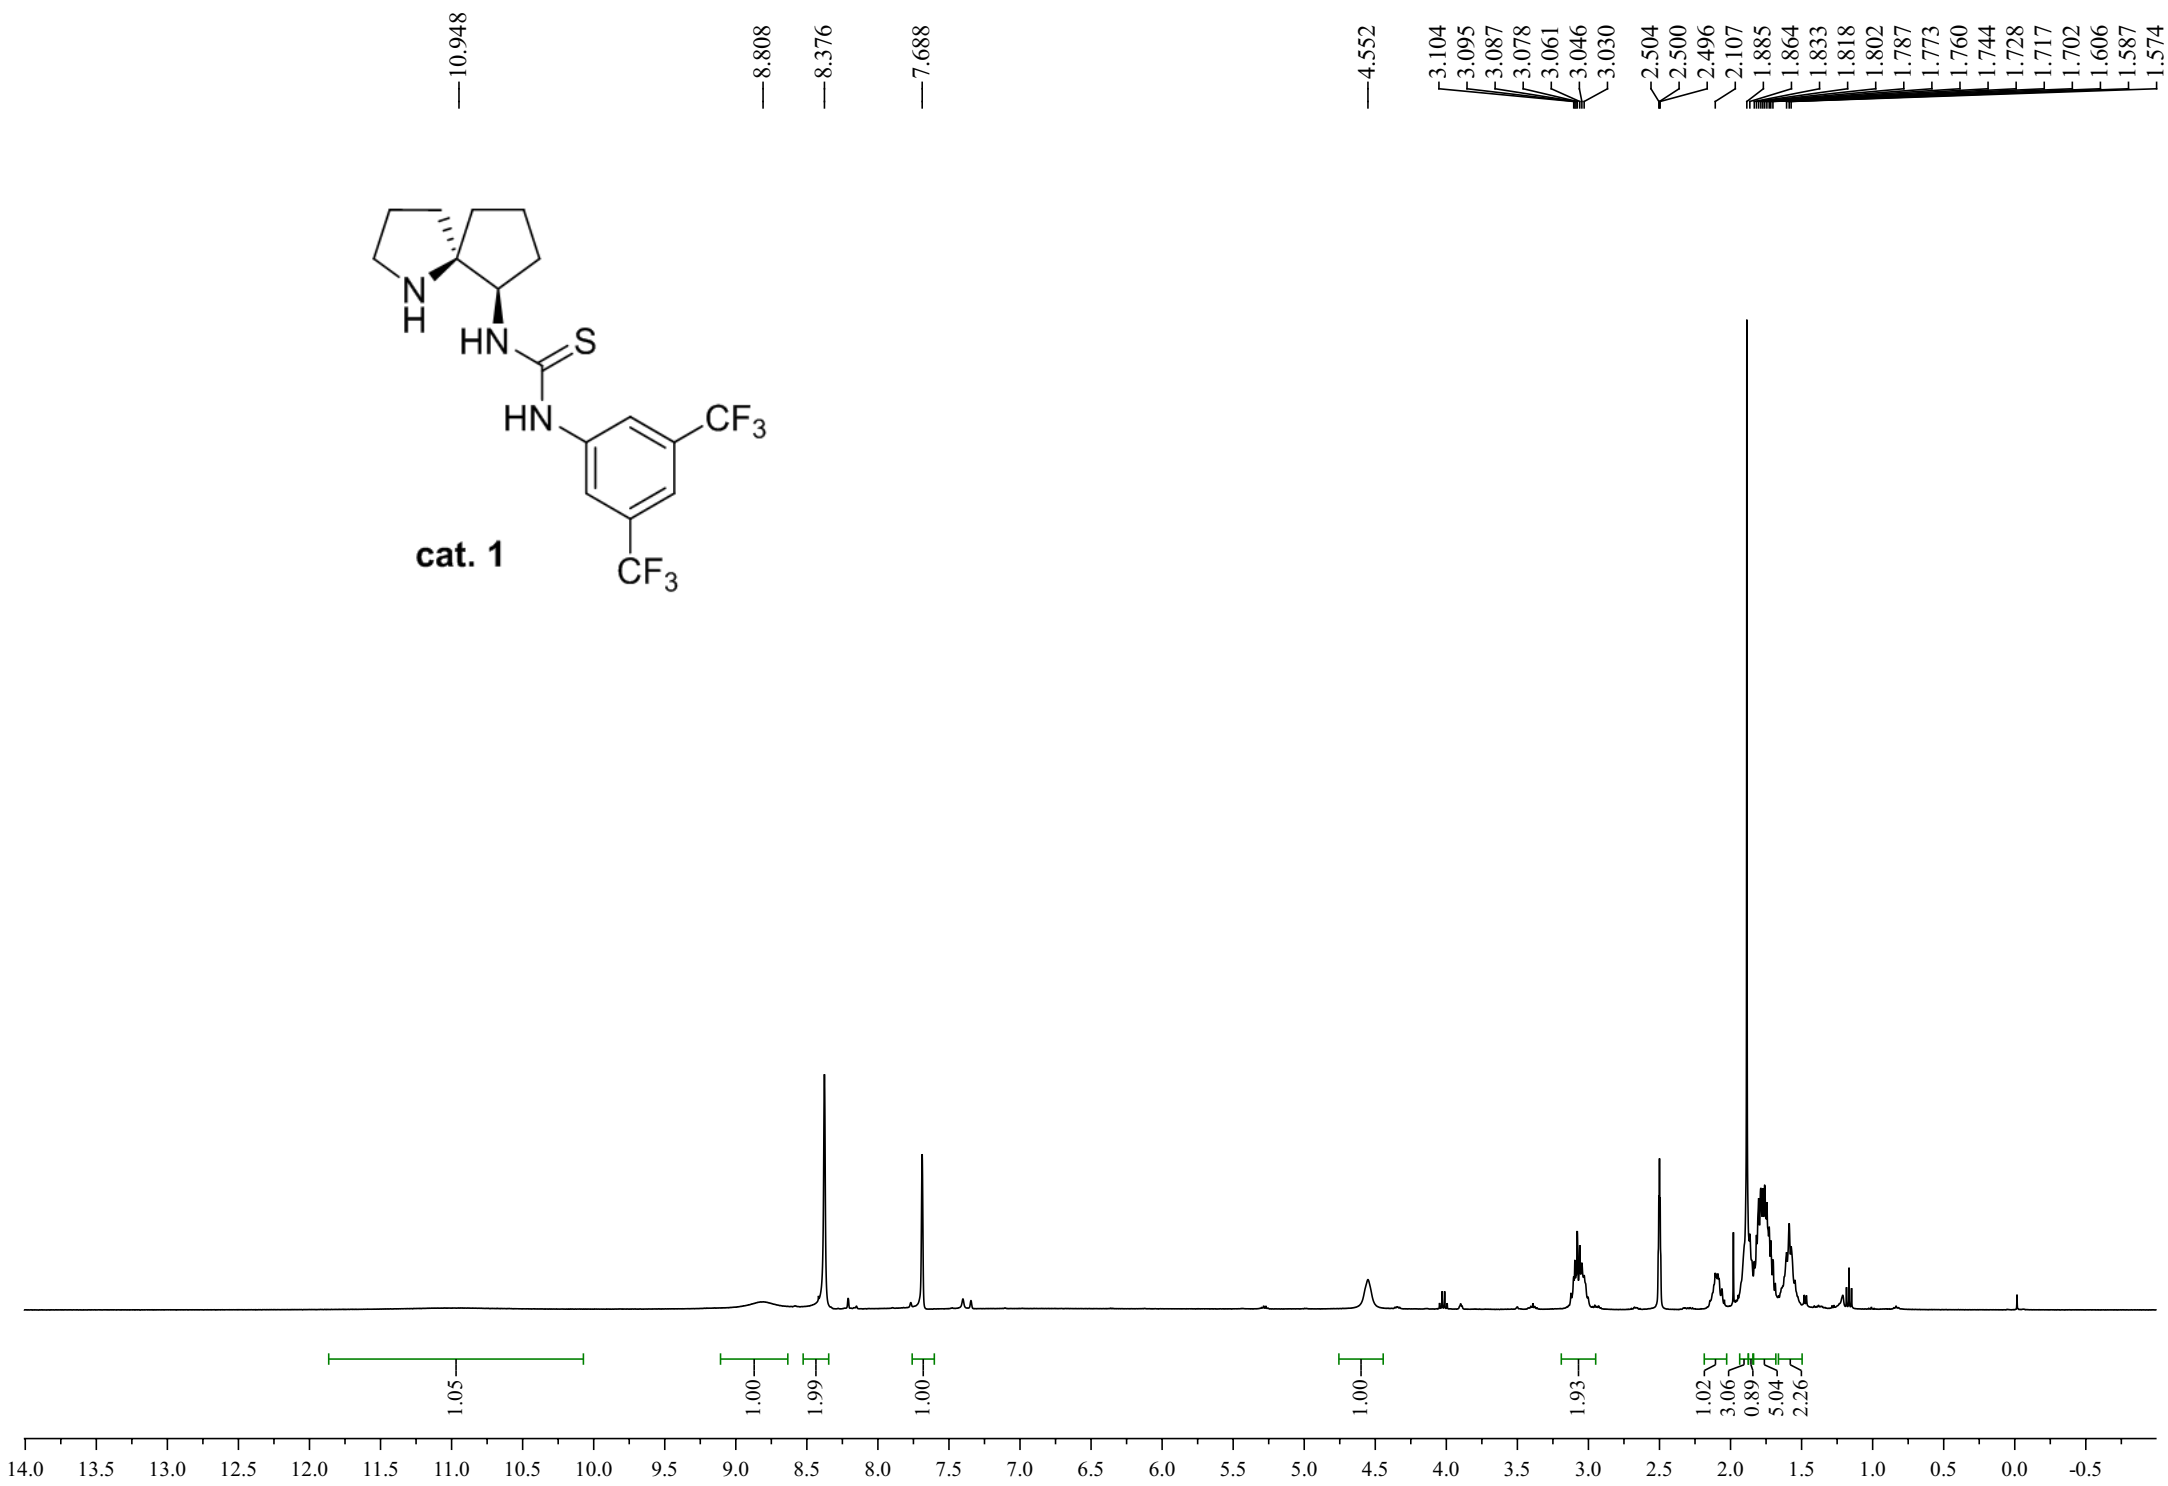

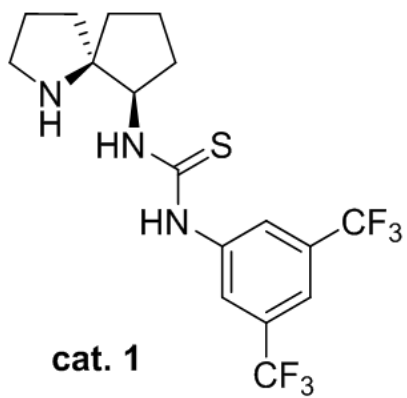

—180.377

—173.056

130.196

129.870

124.614

121.904

121.435

115.843

—71.848

—59.728

—45.340

35.516

34.863

29.793

24.026

21.738

19.695

240 230 220 210 200 190 180 170 160 150 140 130 120 110 100 90 80 70 60 50 40 30 20 10 0 -10



-61.666  
-61.681  
-61.688

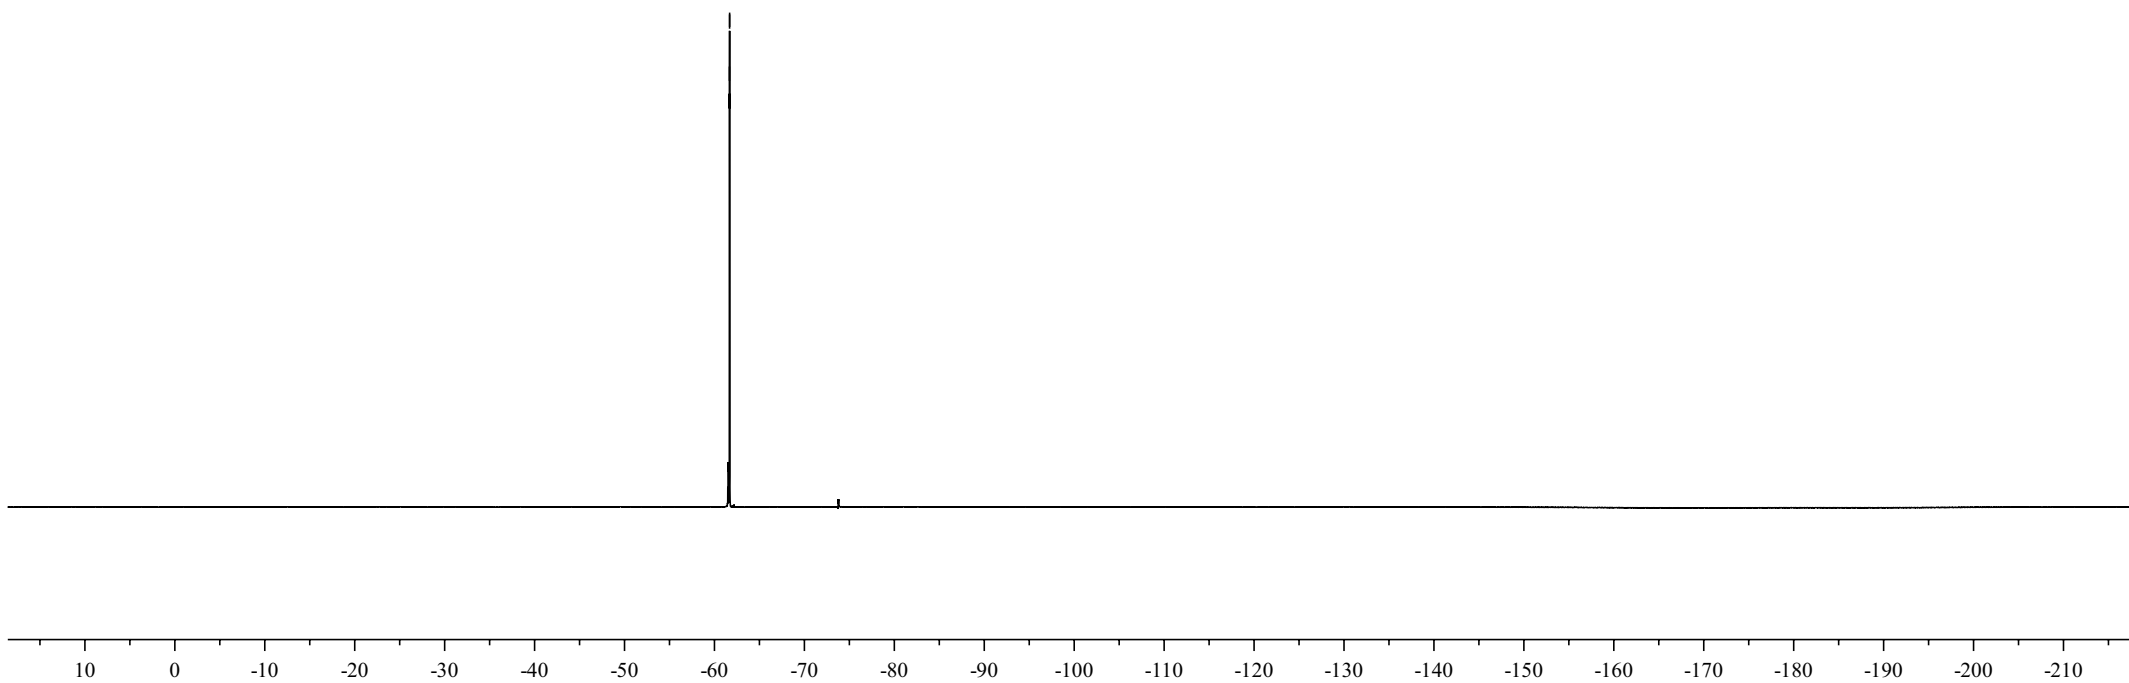

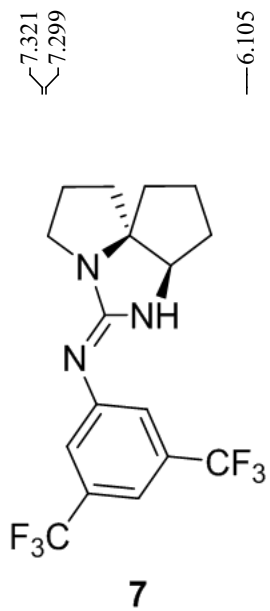

7

7.321  
7.299

6.105

3.944  
3.933

3.271  
3.062  
3.045  
3.035  
3.022  
3.006

1.971  
1.967  
1.953  
1.950  
1.939  
1.931  
1.927  
1.911  
1.902  
1.894  
1.878  
1.863  
1.849  
1.813  
1.799  
1.784  
1.765  
1.746  
1.731  
1.713  
1.699  
1.688  
1.681  
1.667  
1.653  
1.641  
1.624  
1.613  
1.436  
1.422  
1.405  
1.391  
1.375  
1.360

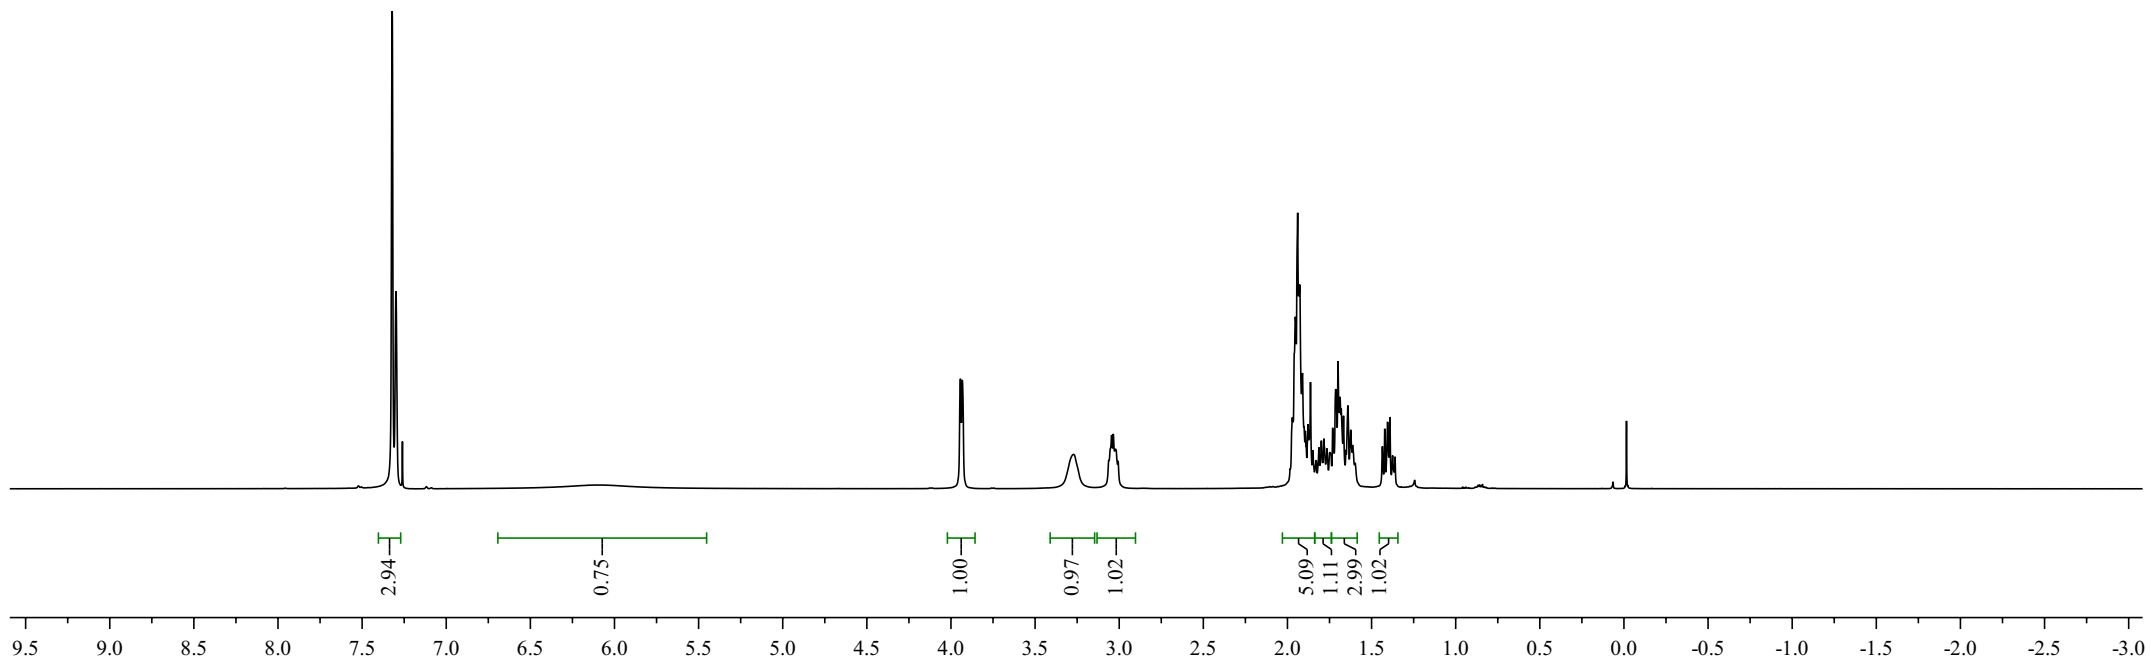

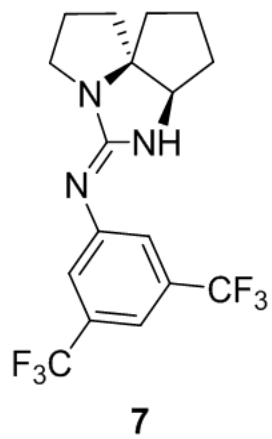

— 160.001  
— 151.902  
132.332  
132.008  
131.685  
131.360  
127.687  
124.976  
122.639  
122.267  
119.557  
113.374

— 79.268

— 62.394

— 47.391

39.455

36.024

35.347

26.175

23.879

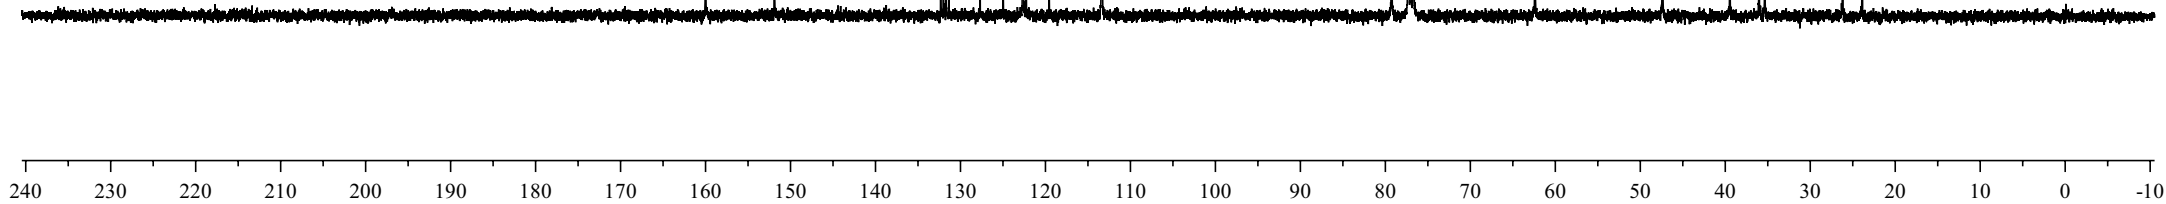

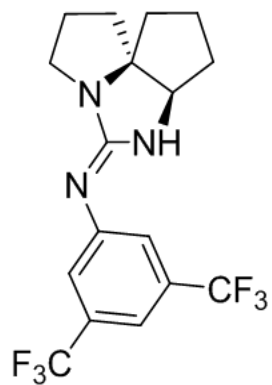

7

—-62.902

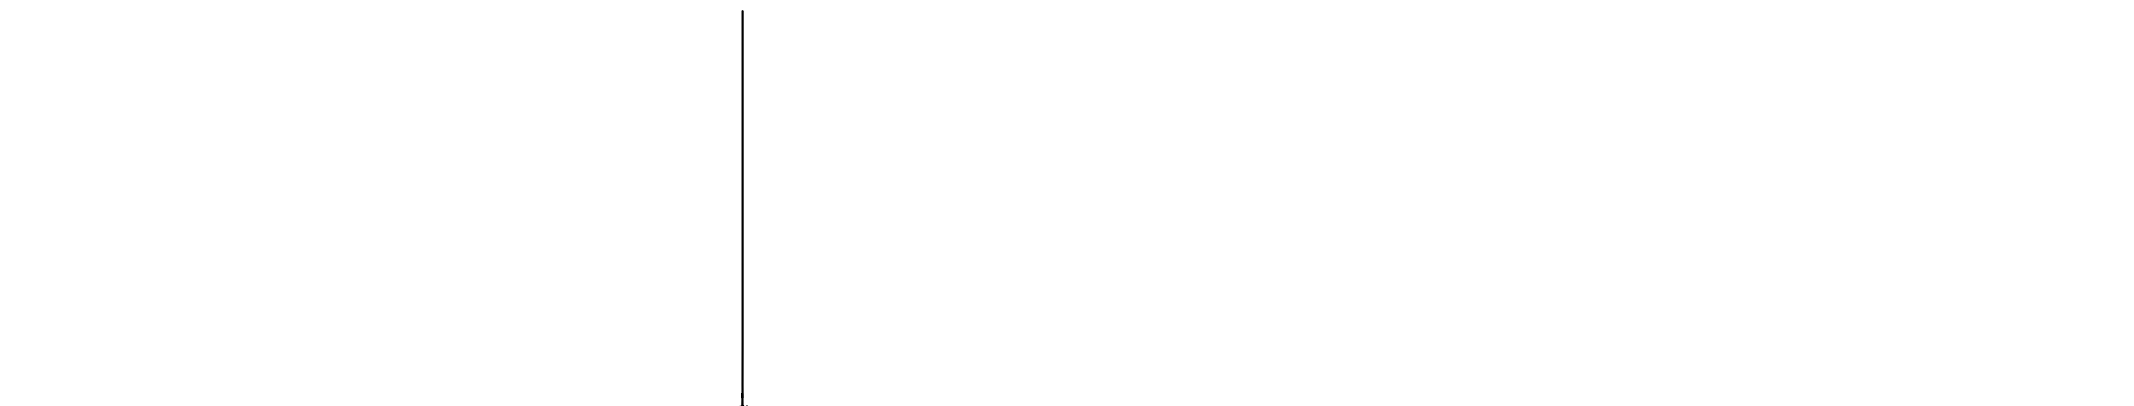

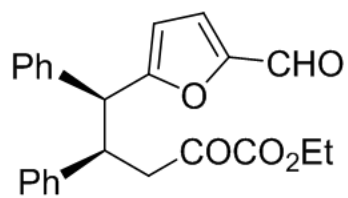

**3a**

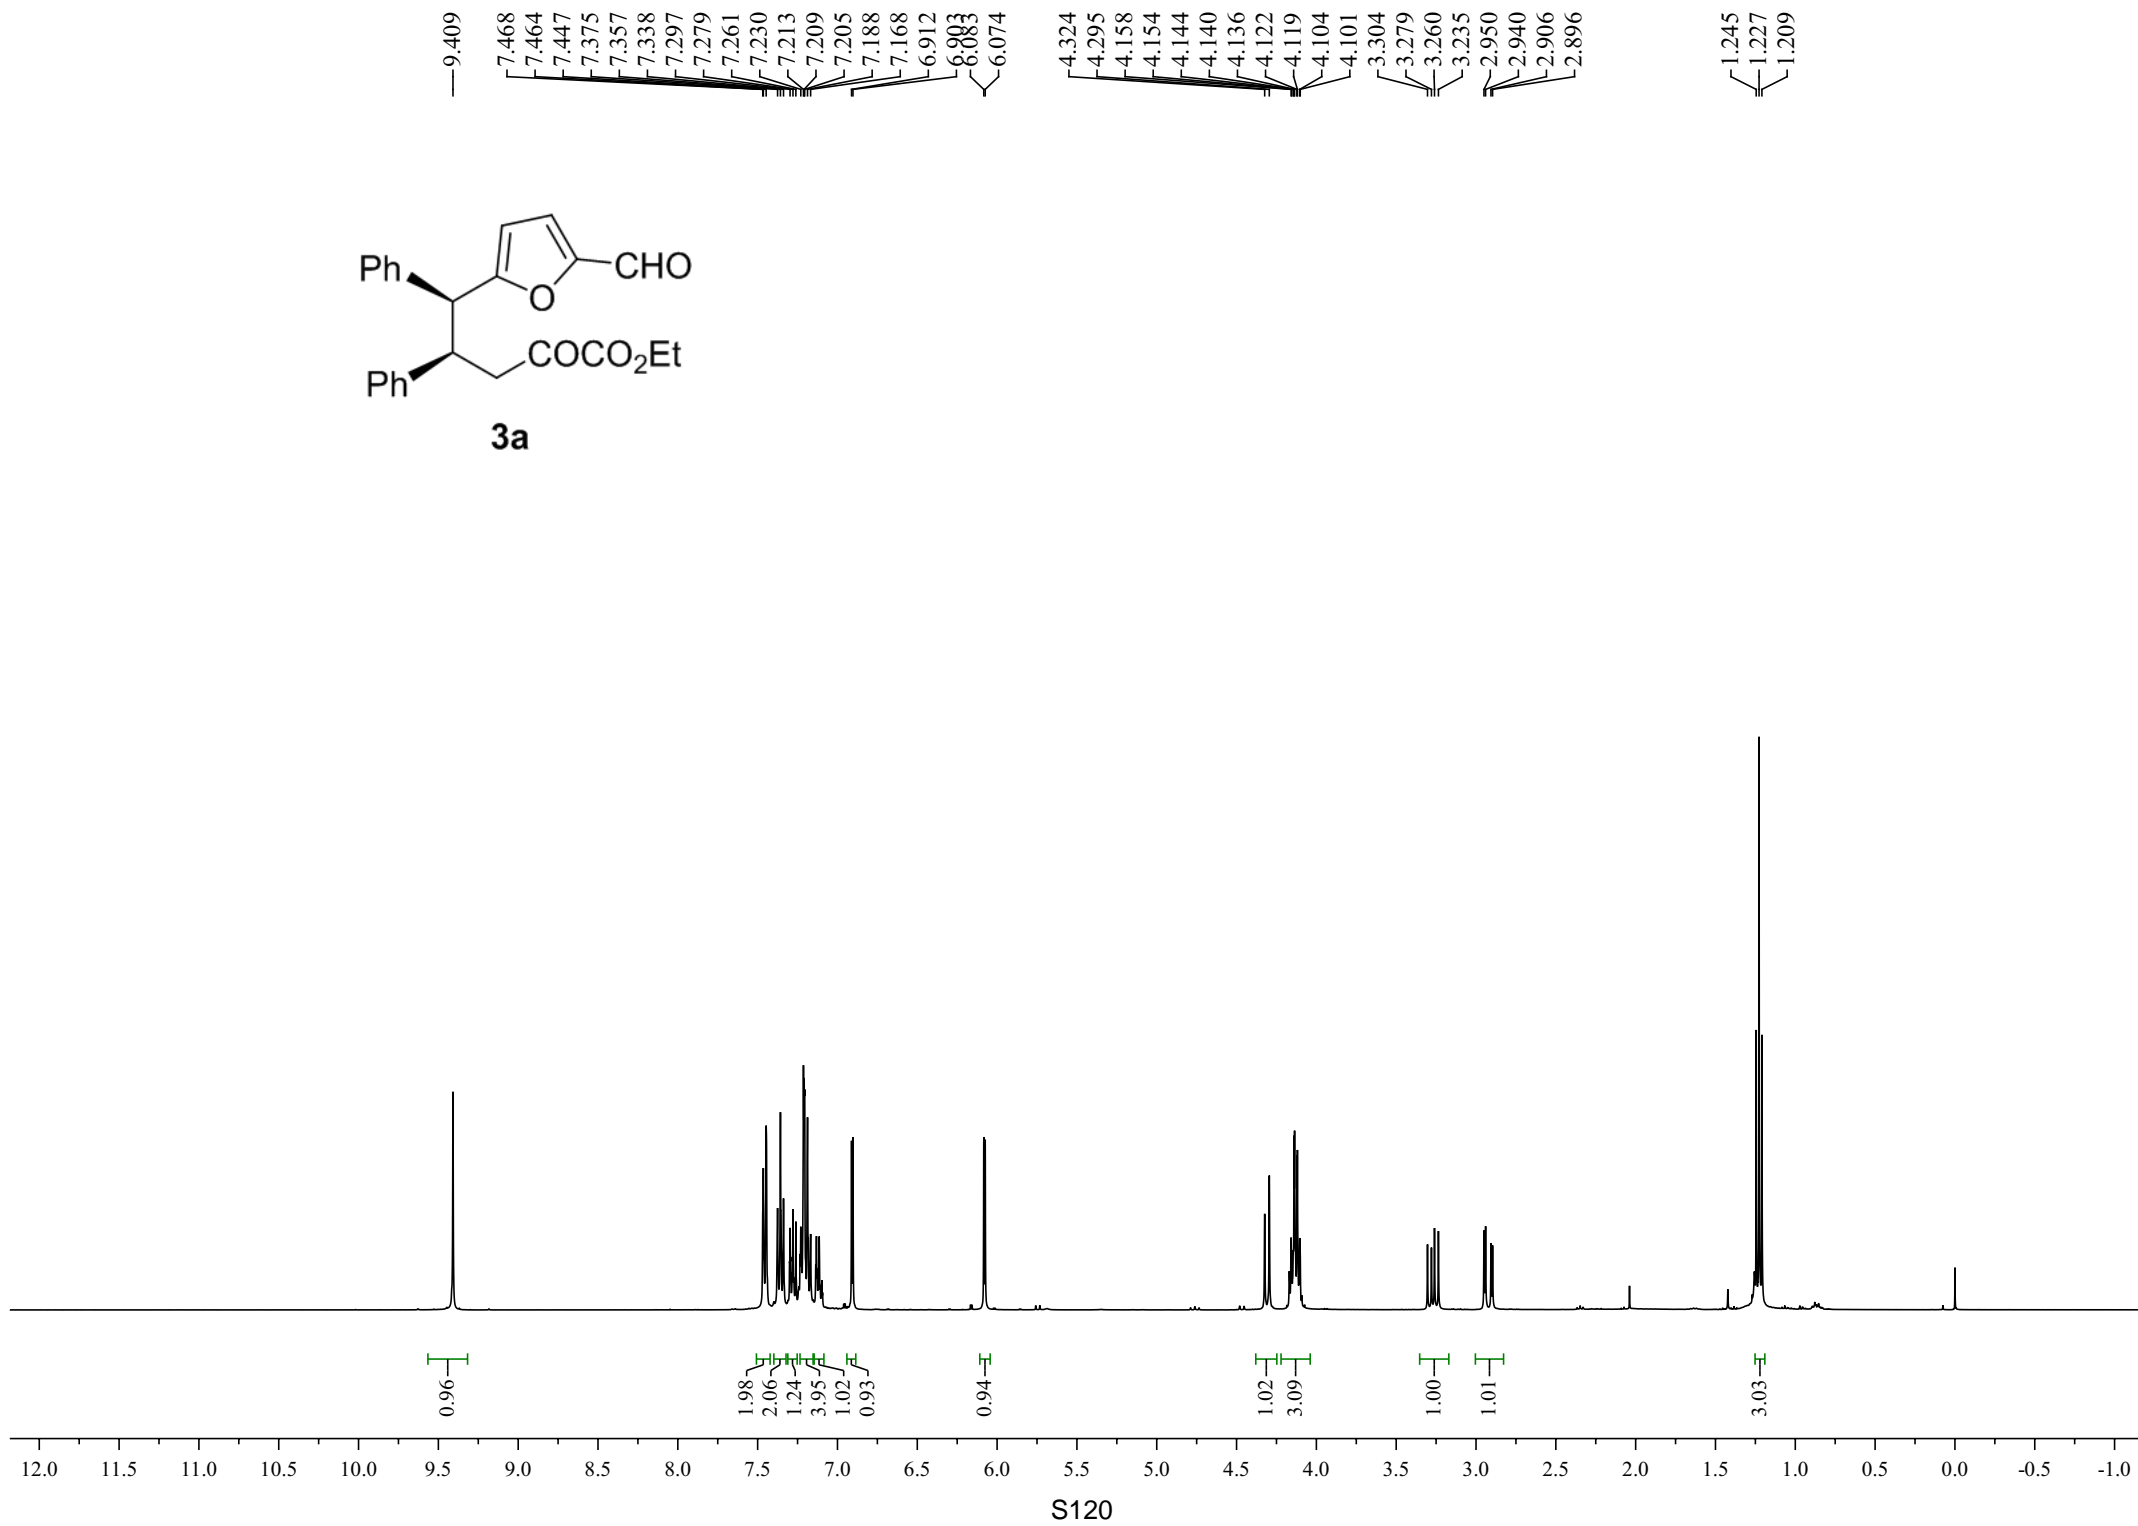



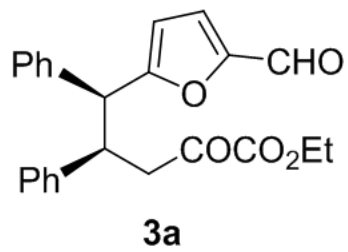

— 192.079

— 177.014

— 162.133

— 160.267

— 151.757

— 140.921

— 138.478

— 129.103

— 128.487

— 128.470

— 127.777

— 127.038

— 109.914

— 62.356

— 52.029

— 44.870

— 43.725

— 13.775

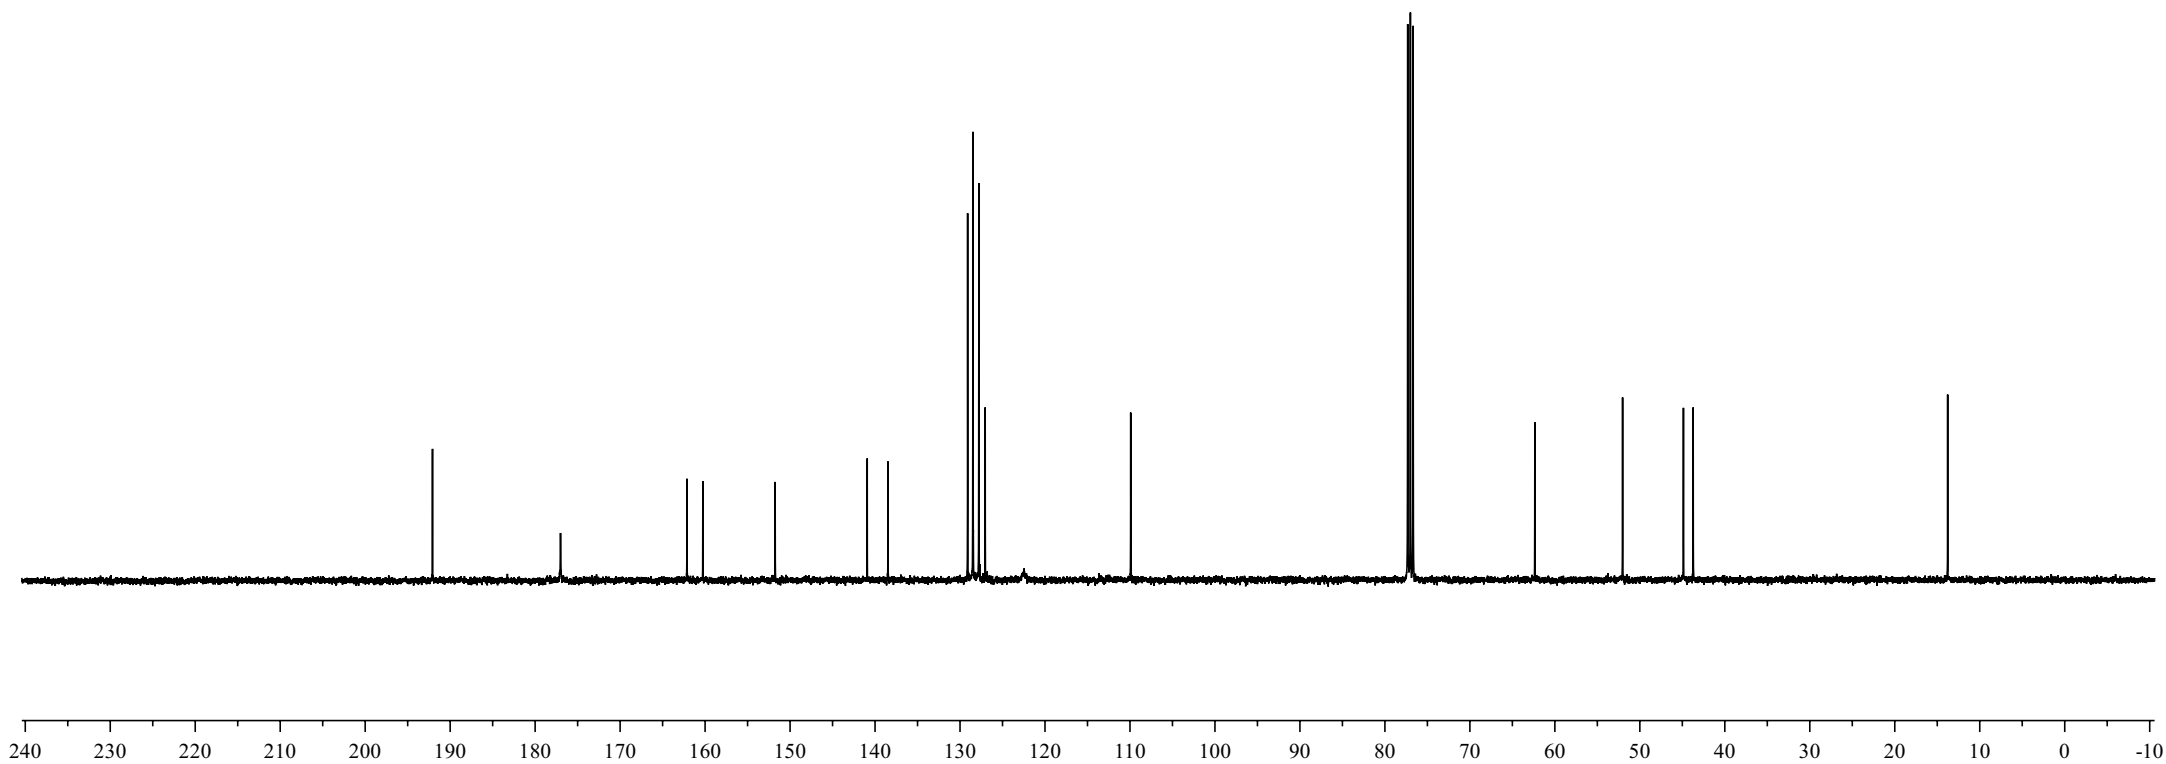

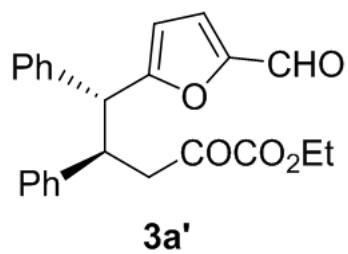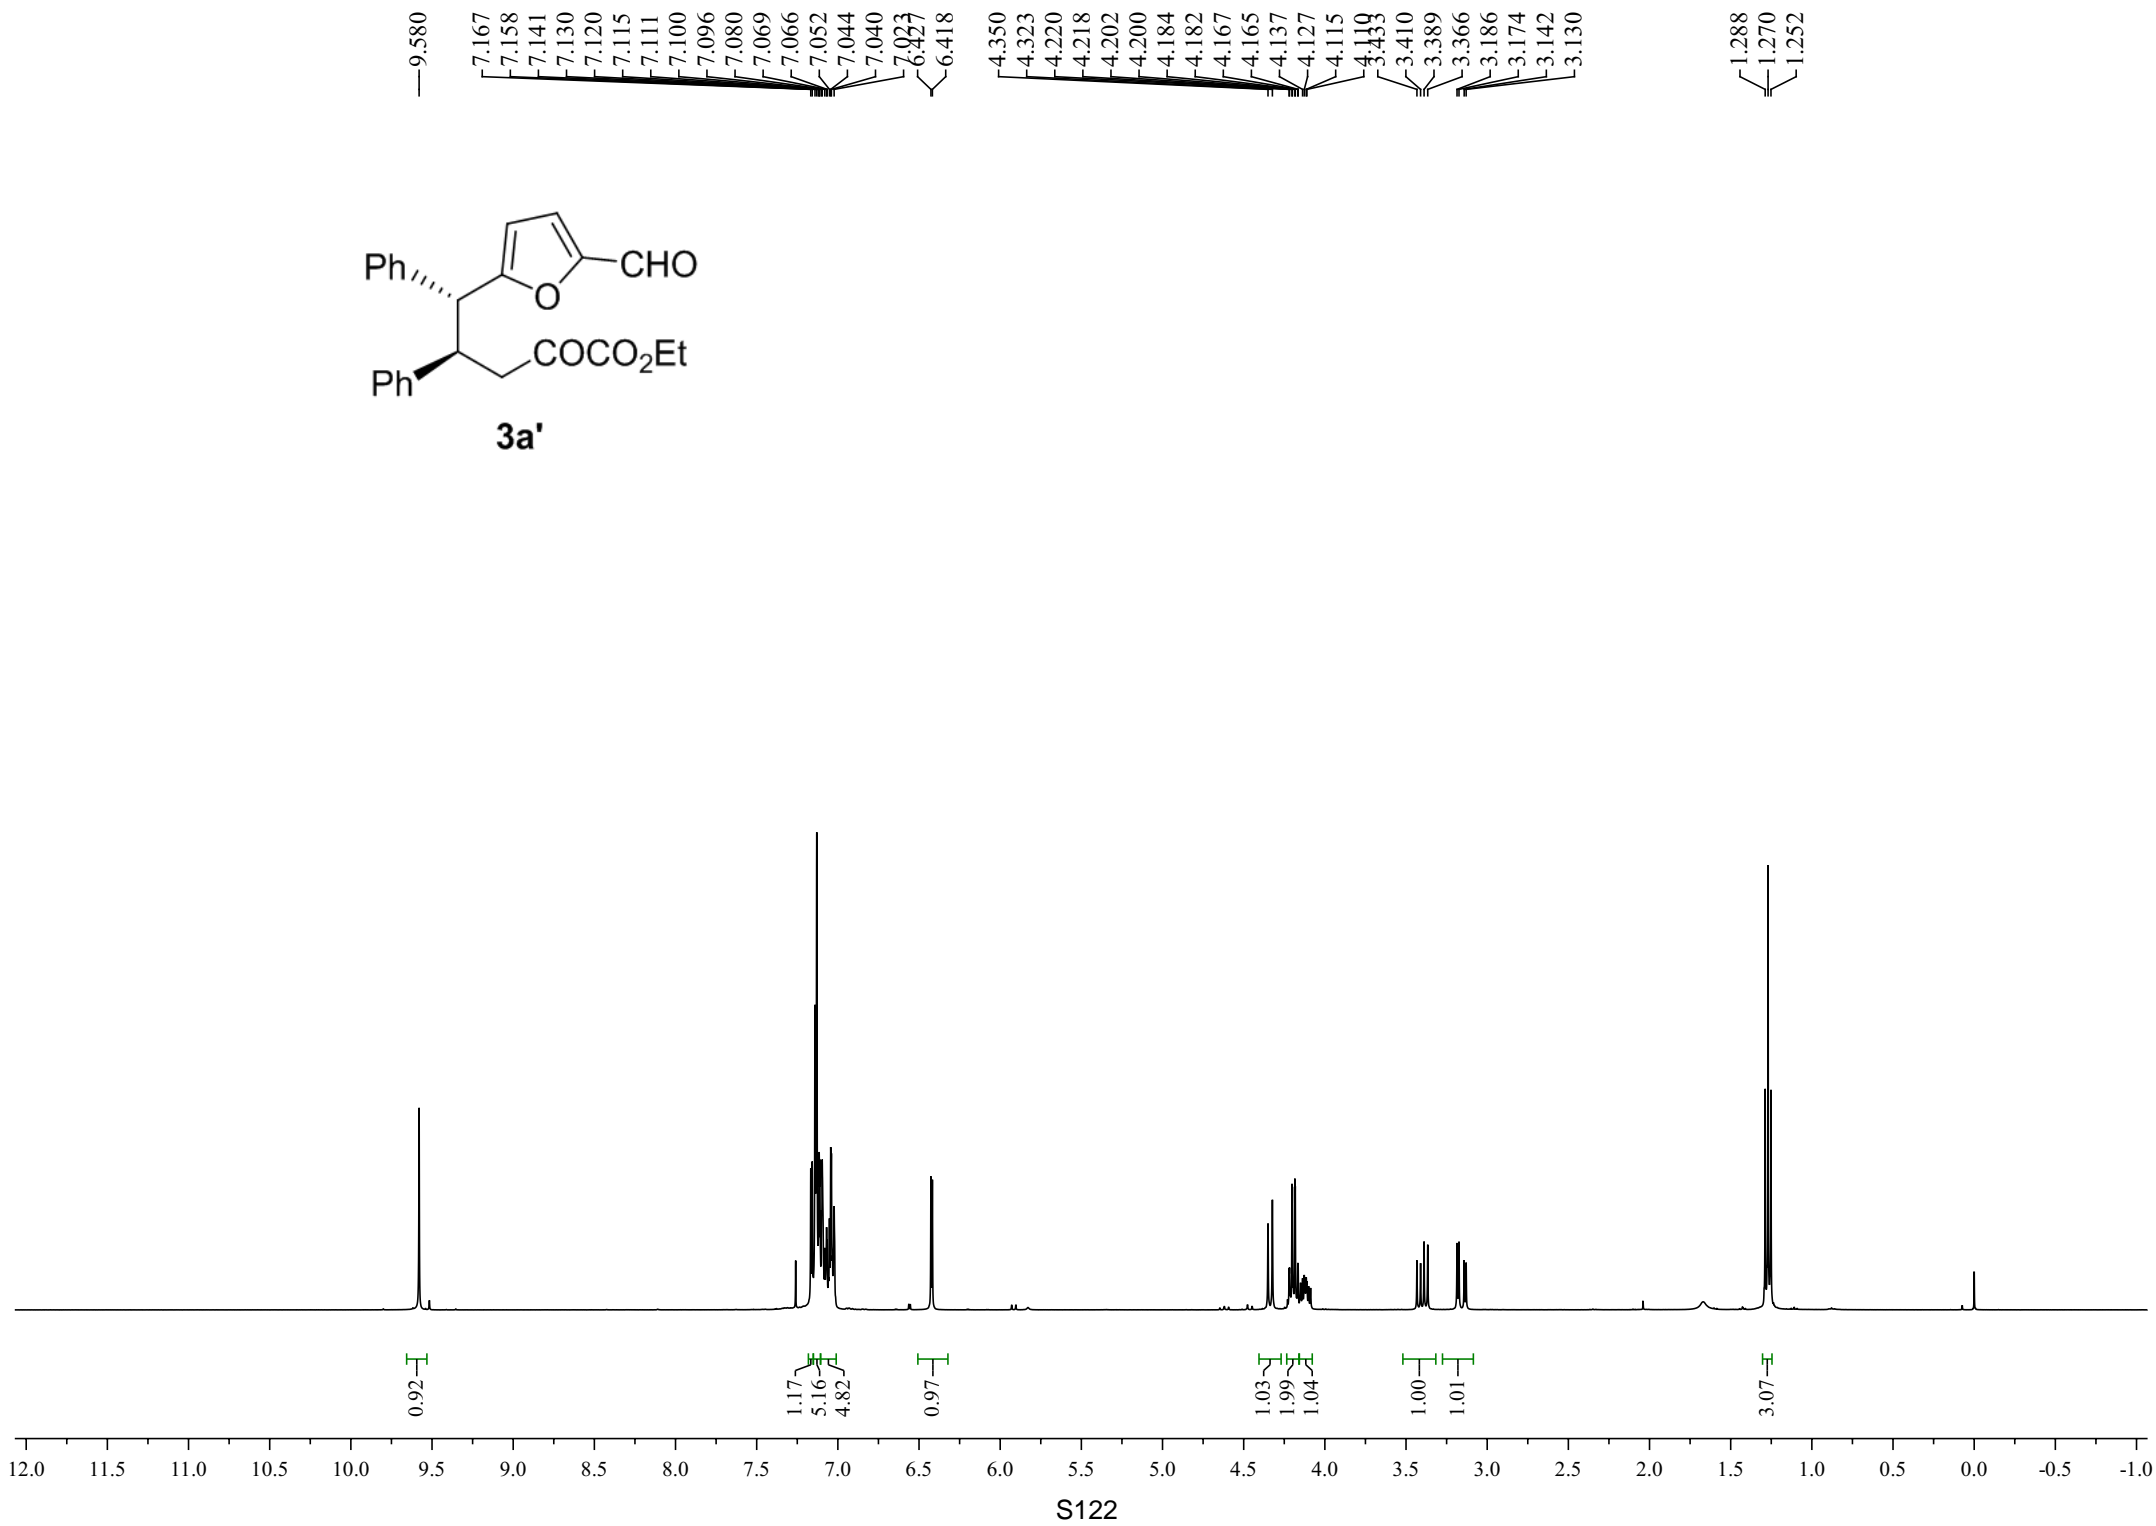

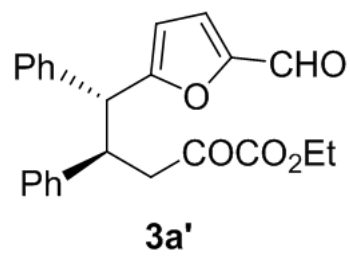

— 191.996

— 177.215

~ 162.422

~ 160.412

— 152.223

~ 140.334

~ 138.261

~ 128.471

~ 128.354

~ 128.274

~ 128.112

~ 127.070

~ 126.857

— 110.432

— 62.484

~ 51.656

~ 45.115

~ 44.007

— 13.830

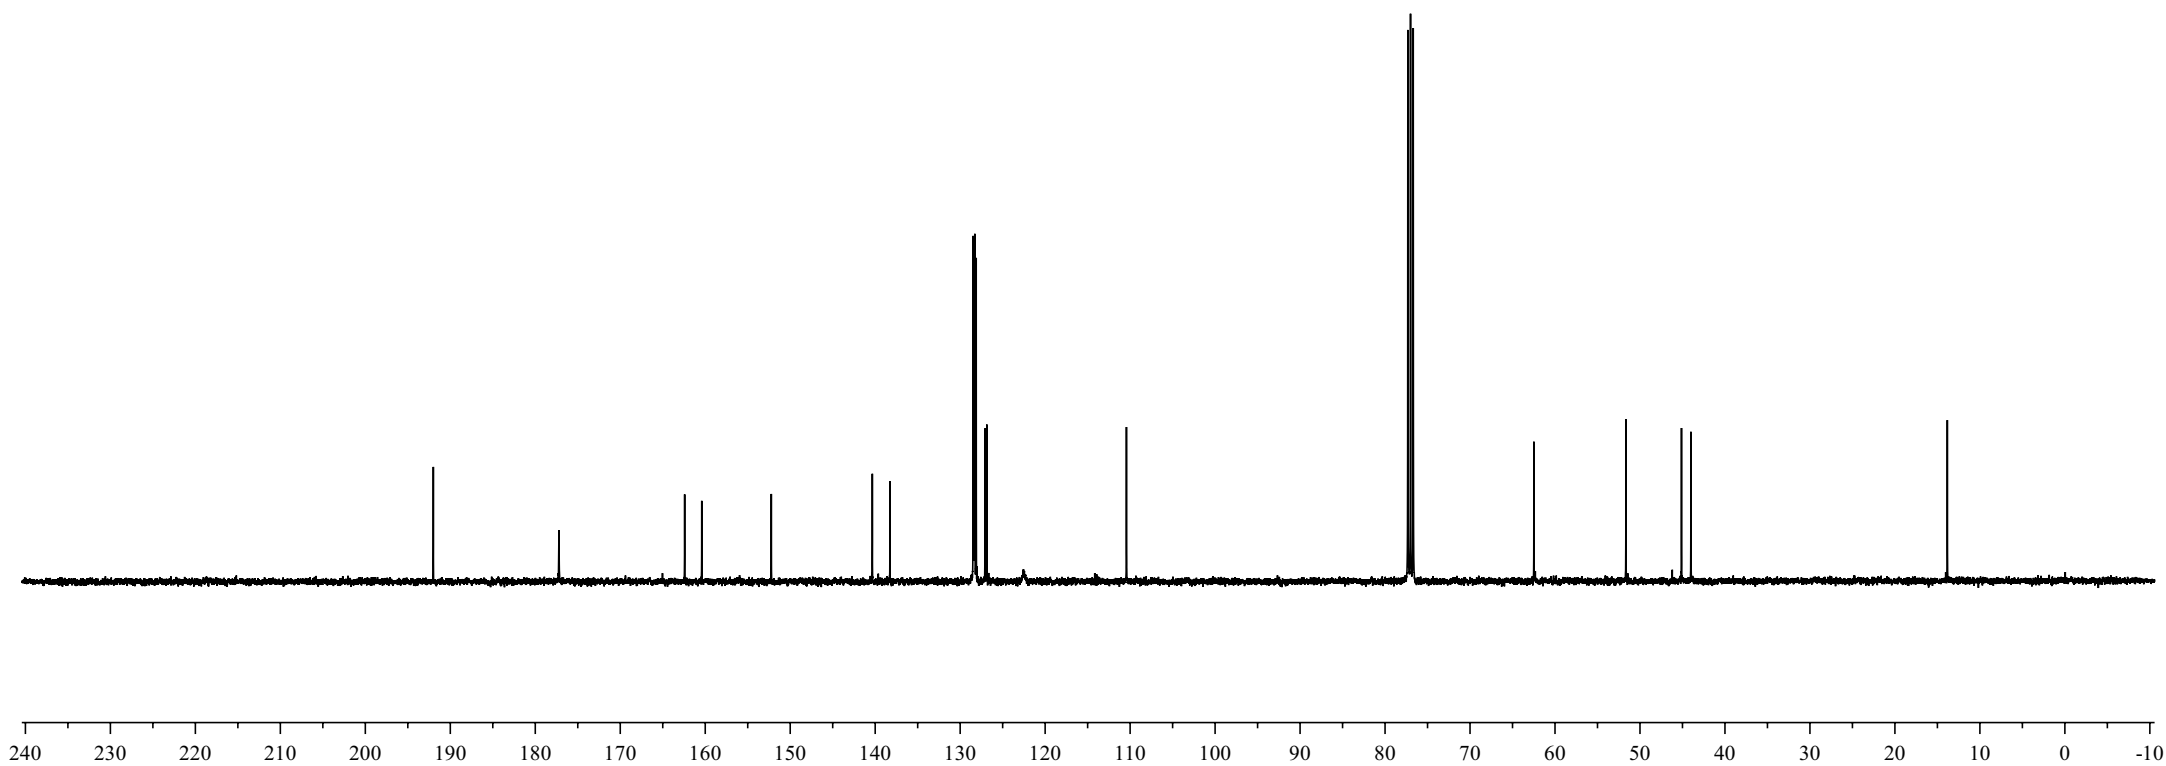

9.331  
7.589  
7.577  
7.379  
7.366  
7.263  
7.250  
7.239  
7.227  
7.213  
7.206  
7.202  
7.189  
7.178  
7.177  
7.121  
6.468  
6.460

4.710  
4.690  
4.134  
4.128  
4.093  
4.081  
4.069  
4.057  
3.335  
3.324  
3.306  
2.863  
2.857  
2.834  
2.828

1.171  
1.159  
1.147

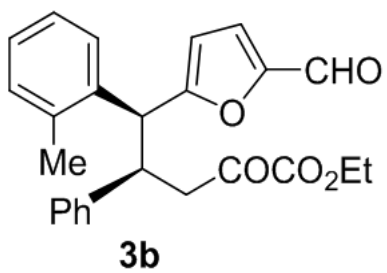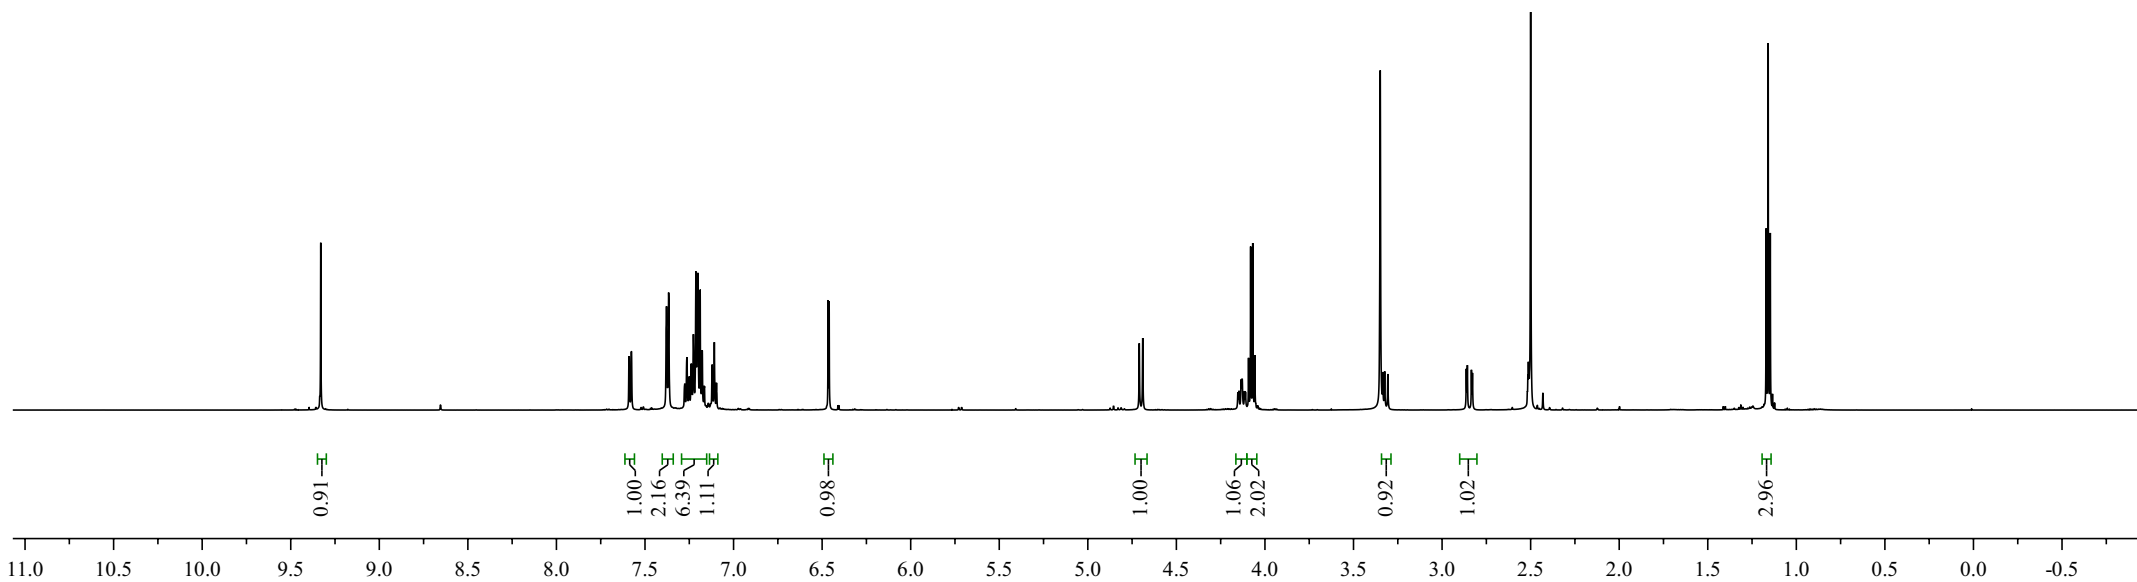

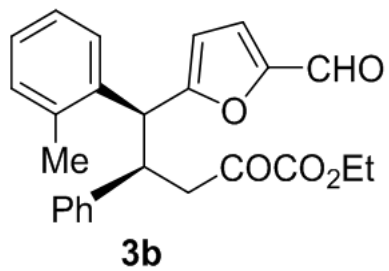

—192.272  
 —177.324  
 —162.323  
 —159.976  
 —151.041  
 —141.572  
 —137.372  
 —136.439  
 —130.690  
 —128.138  
 —128.093  
 —127.223  
 —127.142  
 —126.758  
 —126.660  
 —110.180

—61.712

—45.904  
 —44.082  
 —42.761

—19.695  
 —13.672

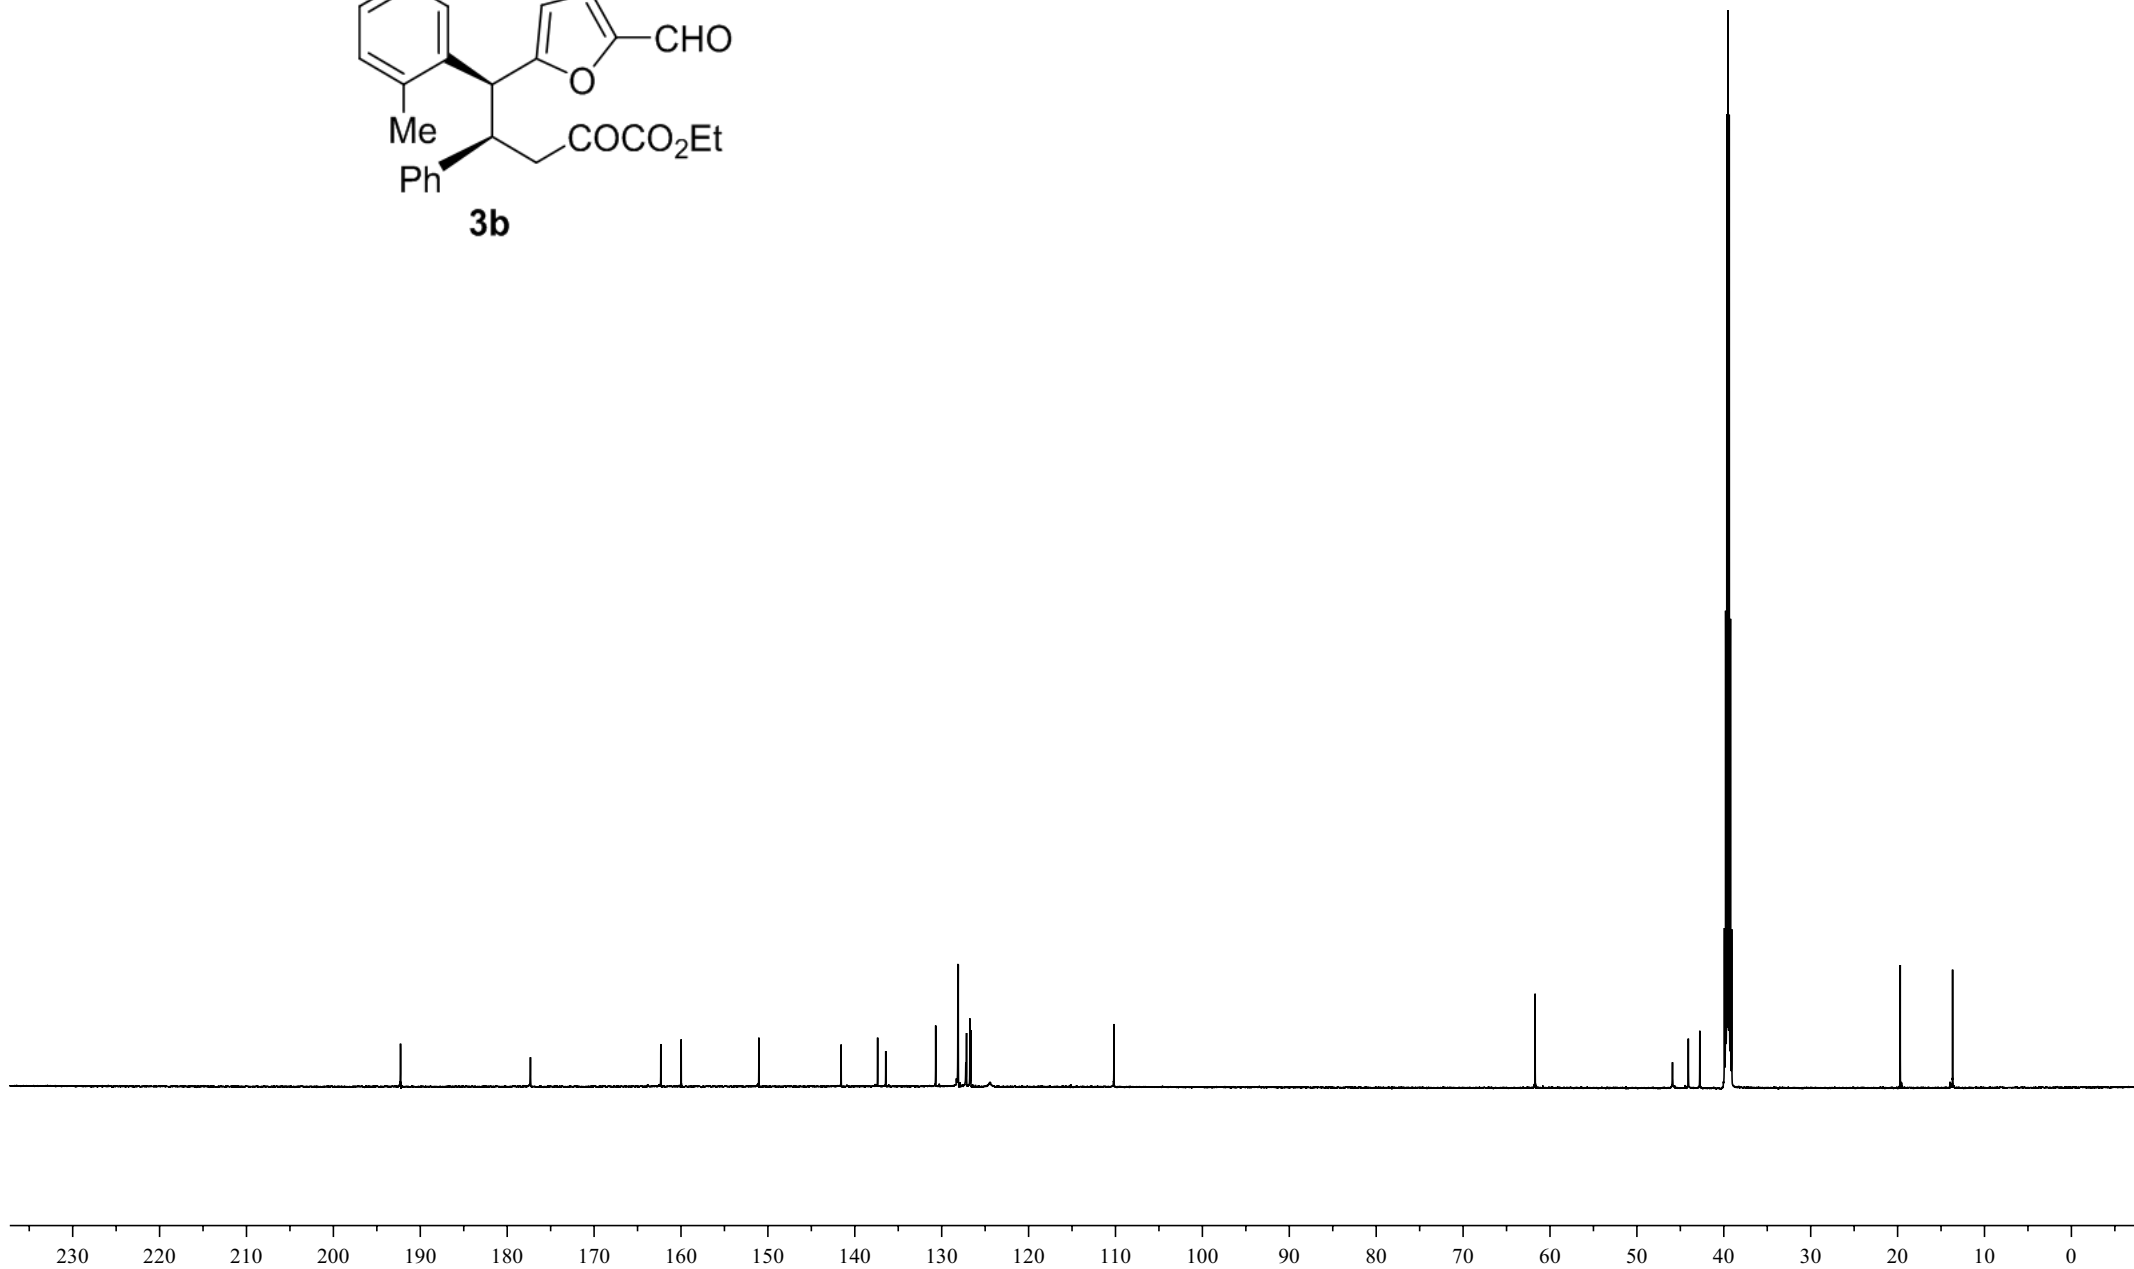

9.489  
 7.568  
 7.555  
 7.462  
 7.456  
 7.248  
 7.246  
 7.234  
 7.102  
 7.089  
 7.076  
 7.064  
 7.063  
 7.010  
 6.998  
 6.988  
 6.986  
 6.931  
 6.929  
 6.919  
 6.917  
 6.907  
 6.905  
 6.891  
 6.880  
 6.756  
 6.750  
 4.870  
 4.851  
 4.127  
 4.115  
 4.104  
 4.092  
 3.456  
 3.440  
 3.426  
 3.410  
 3.128  
 3.120  
 3.098  
 3.091  
 2.164  
 1.196  
 1.184  
 1.172

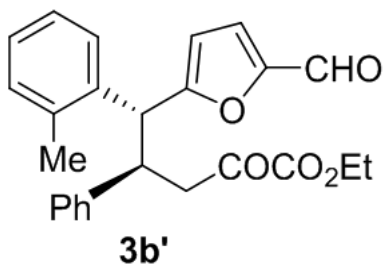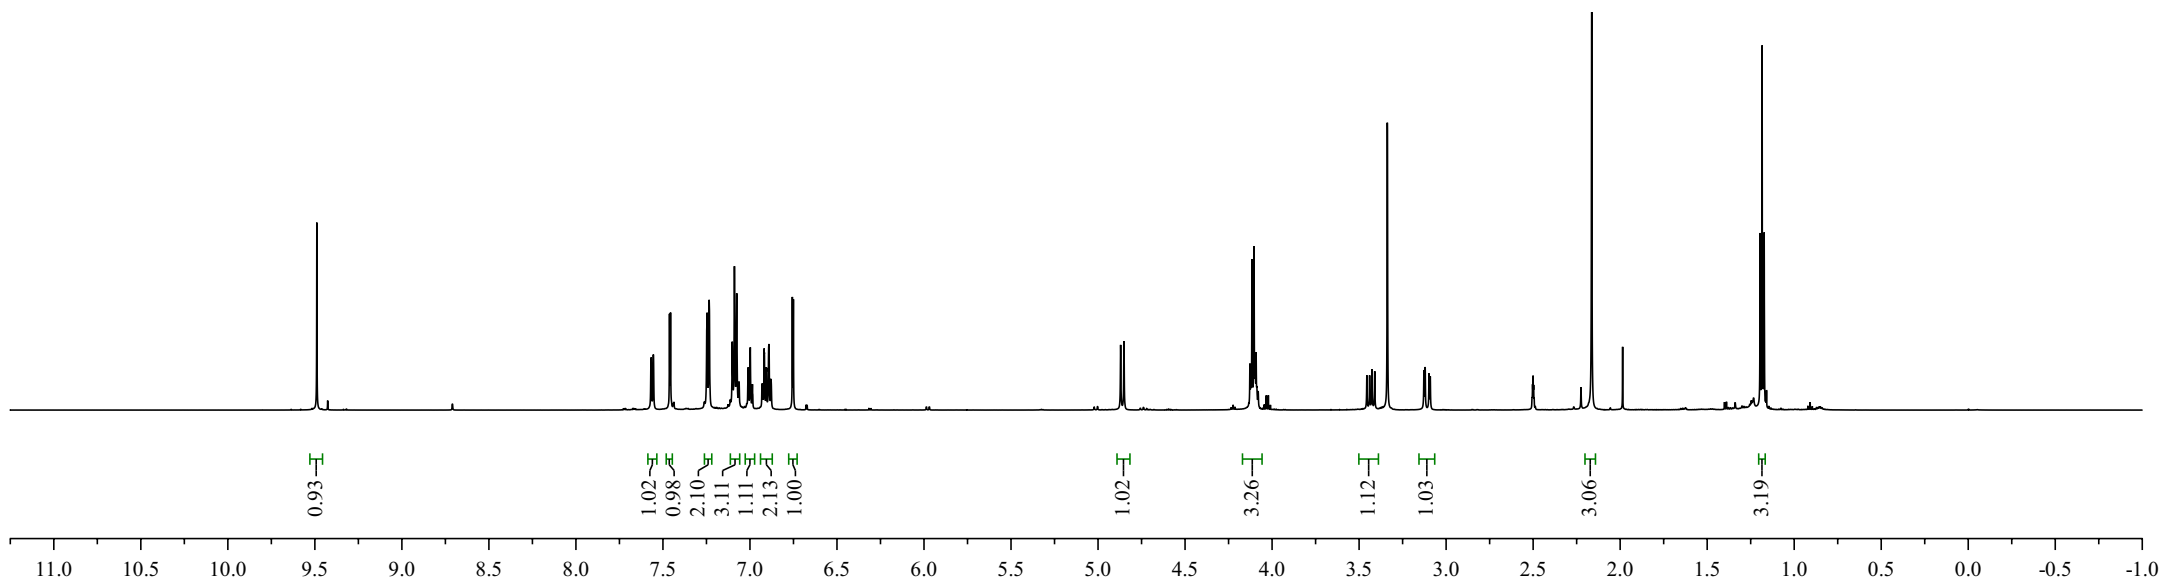

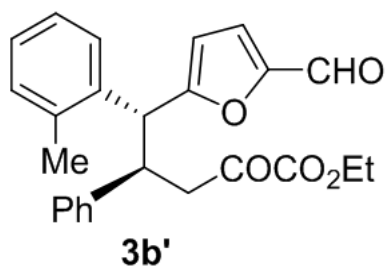

—191.836  
—177.589  
—162.363  
—159.973  
—151.796  
141.351  
137.321  
135.552  
129.993  
128.152  
127.896  
127.843  
126.395  
125.962  
—110.587

—61.721

45.011  
44.010  
43.806

—19.395

—13.714

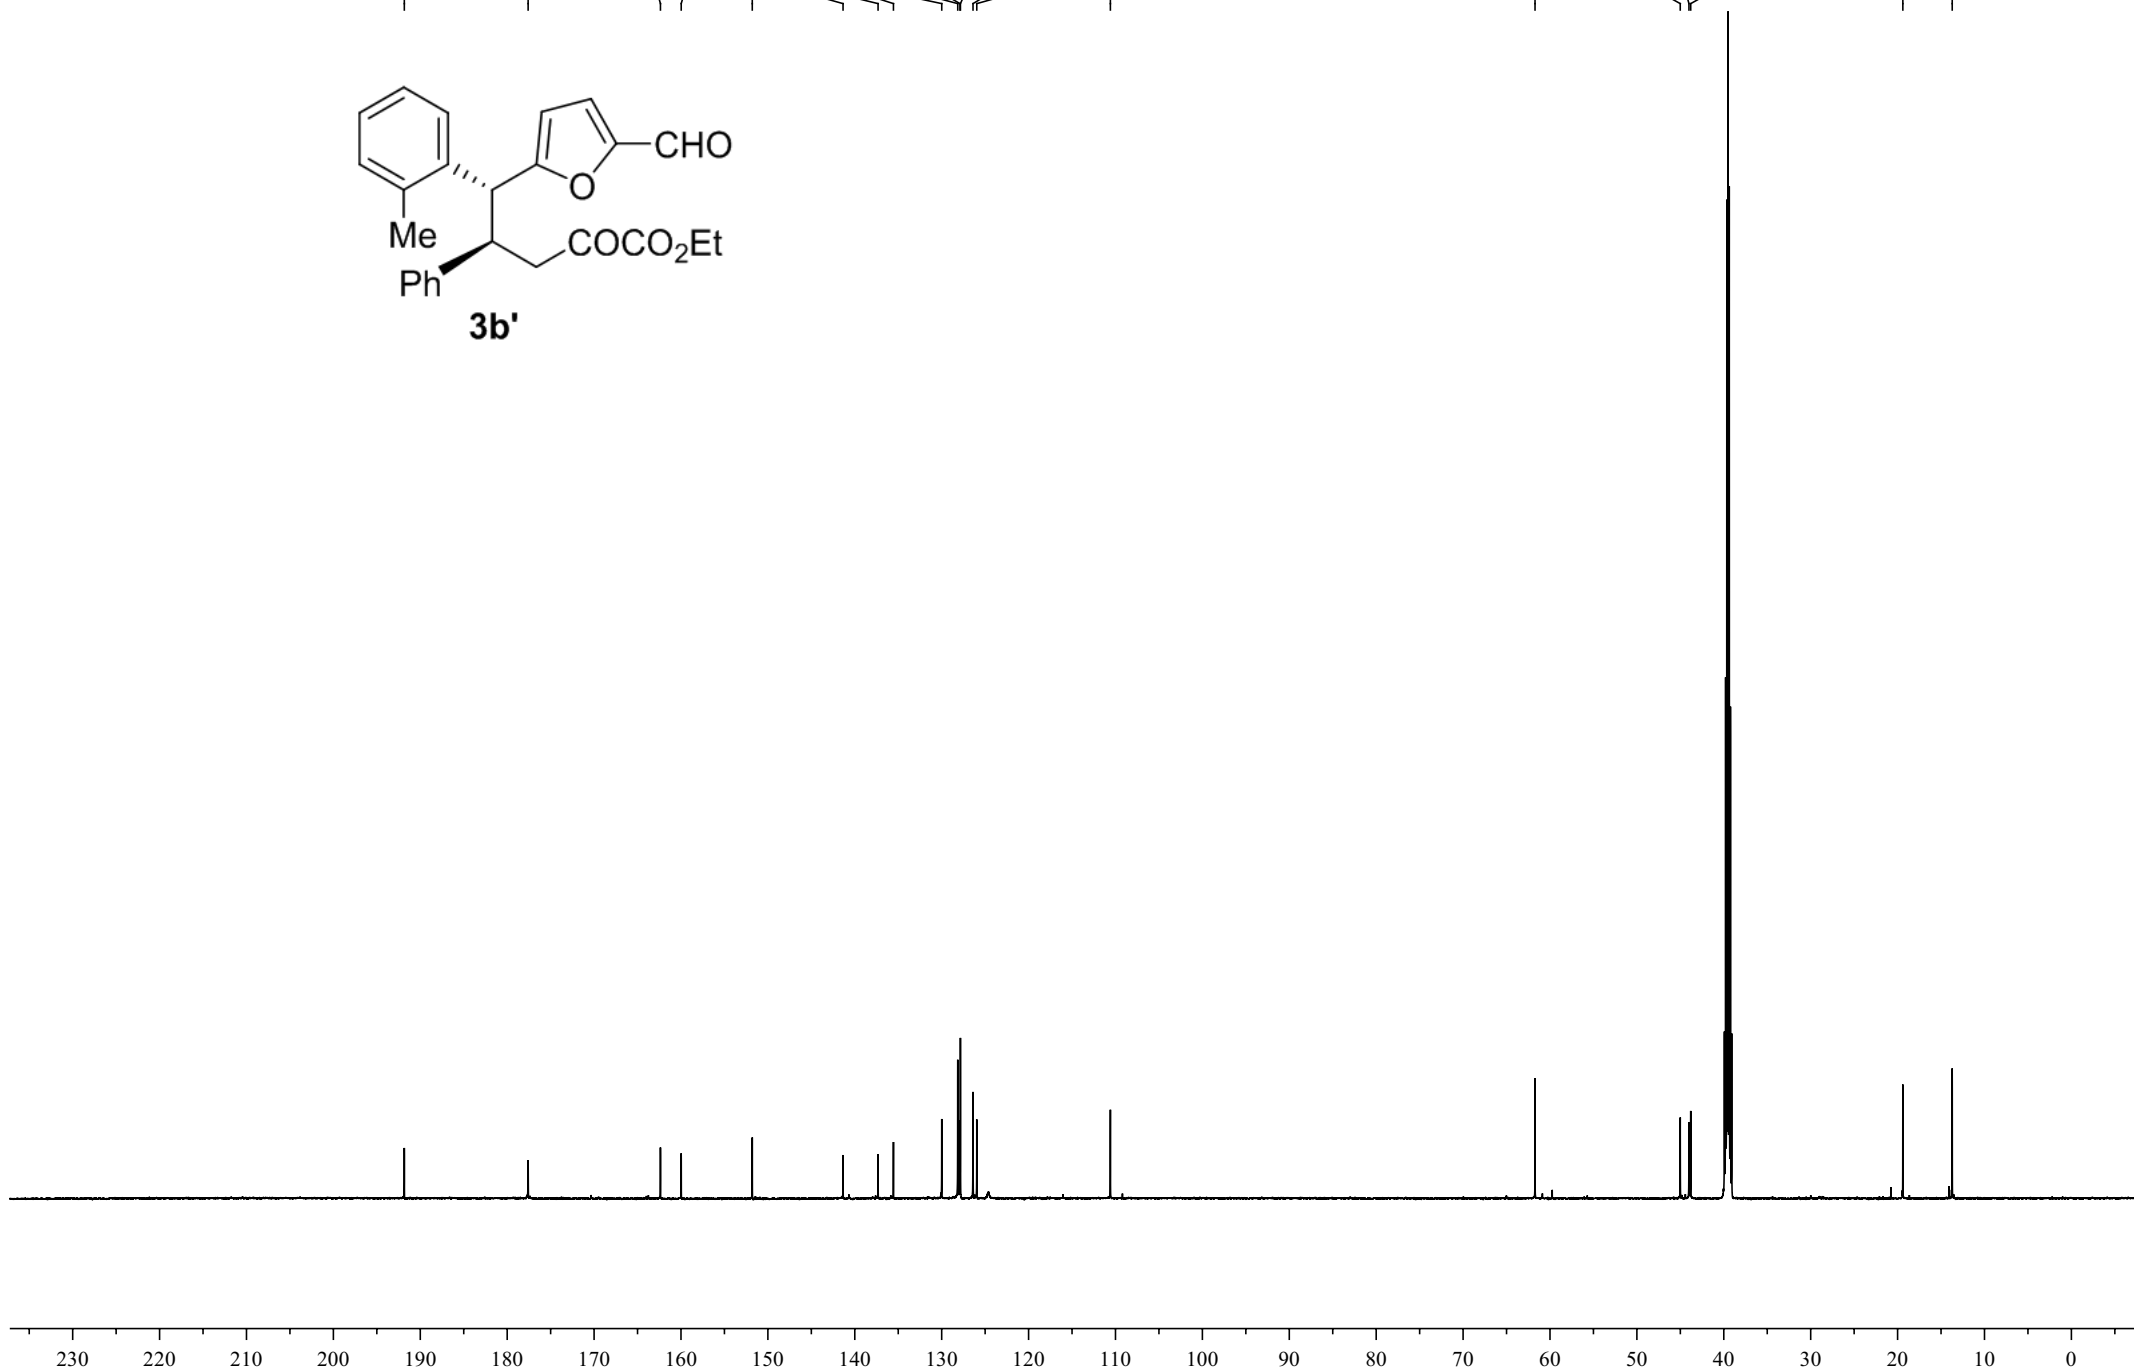

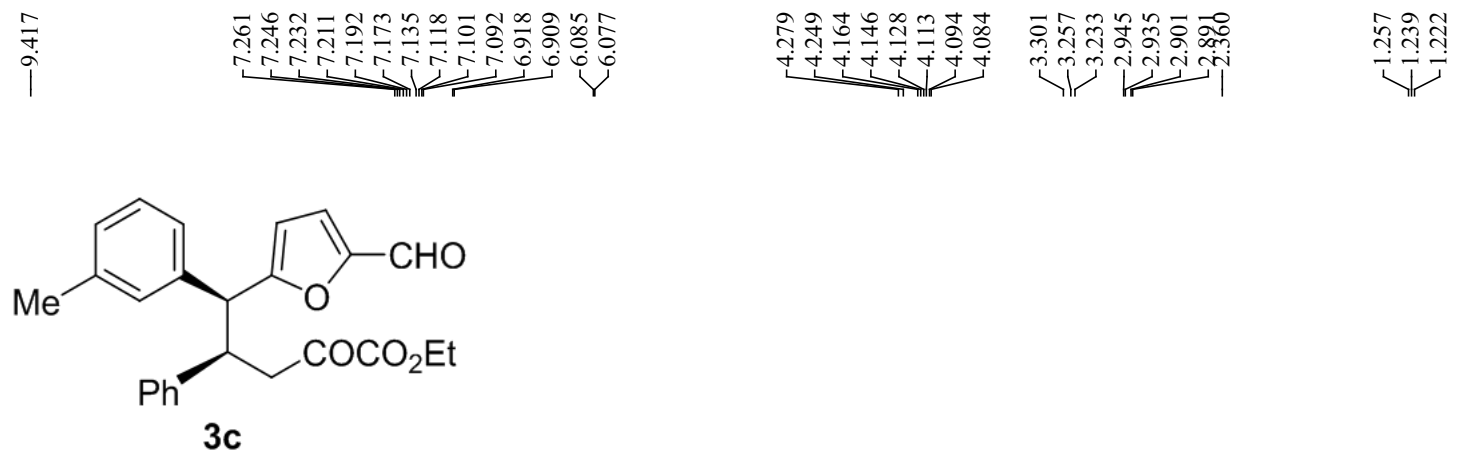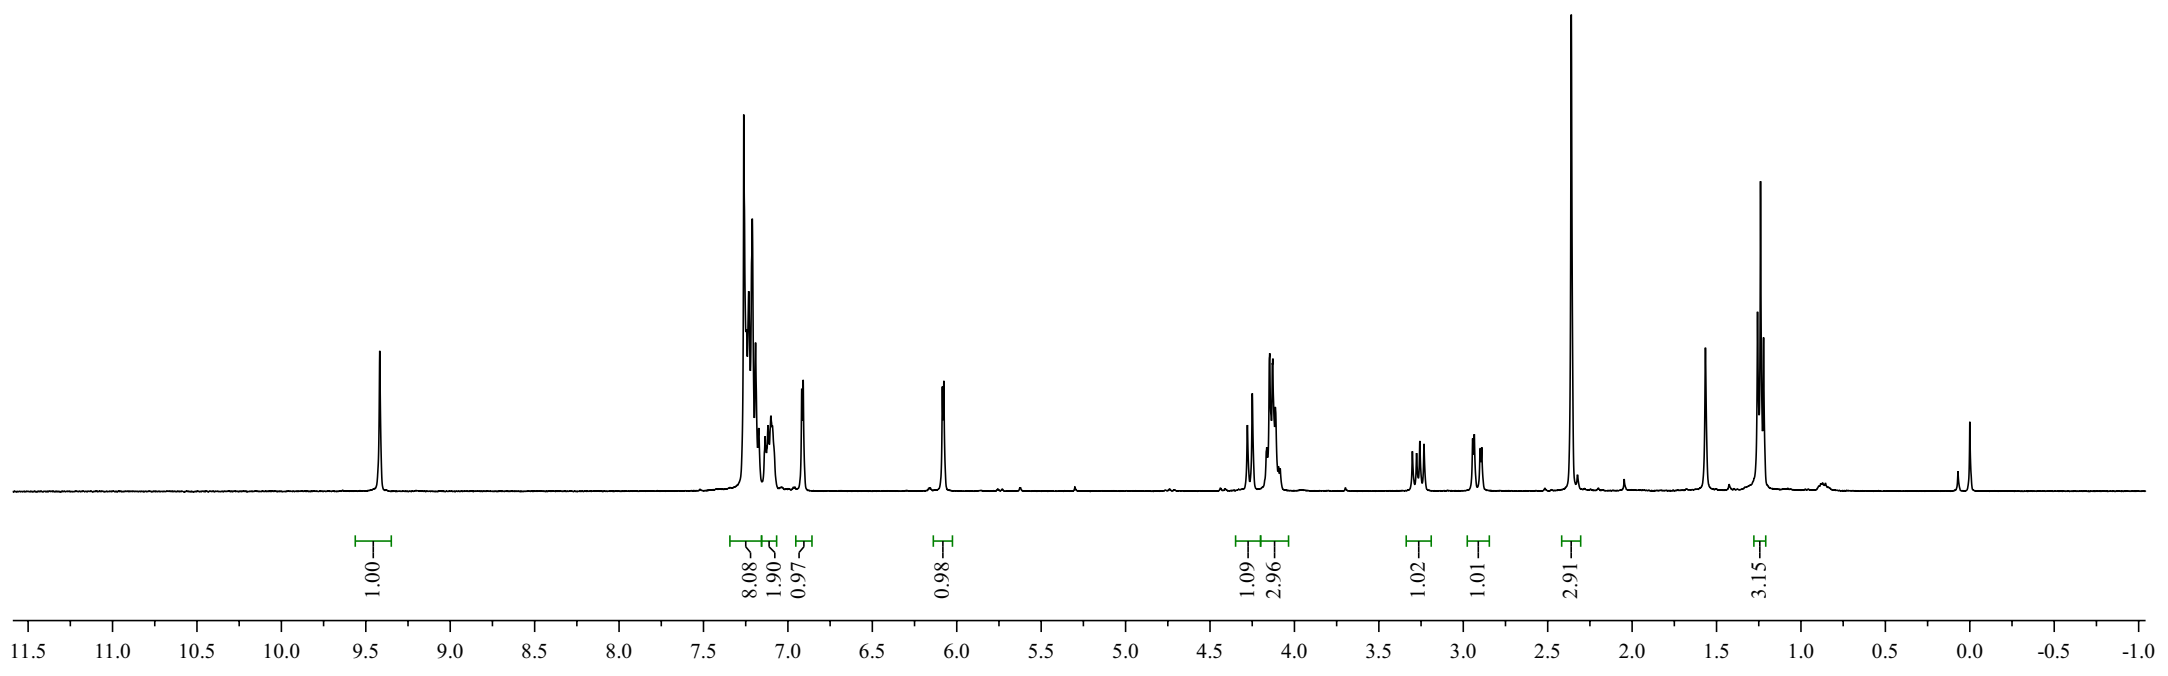



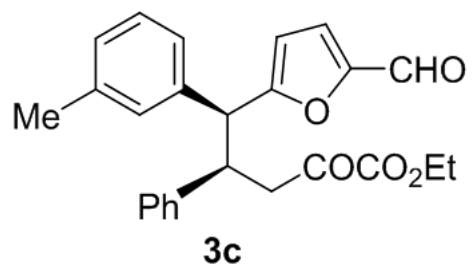

—192.171  
—177.073  
—162.370  
—160.337  
—151.758  
—141.070  
—138.874  
—138.473  
—129.239  
—129.053  
—128.603  
—128.510  
—127.929  
—109.859

—62.409  
—52.021  
—44.831  
—43.866  
—21.486  
—13.837

240 230 220 210 200 190 180 170 160 150 140 130 120 110 100 90 80 70 60 50 40 30 20 10 0 -10

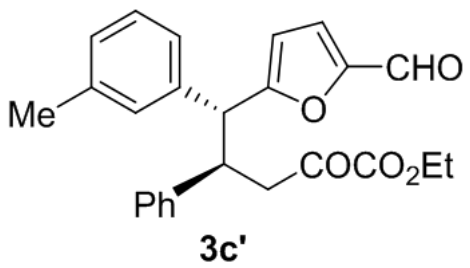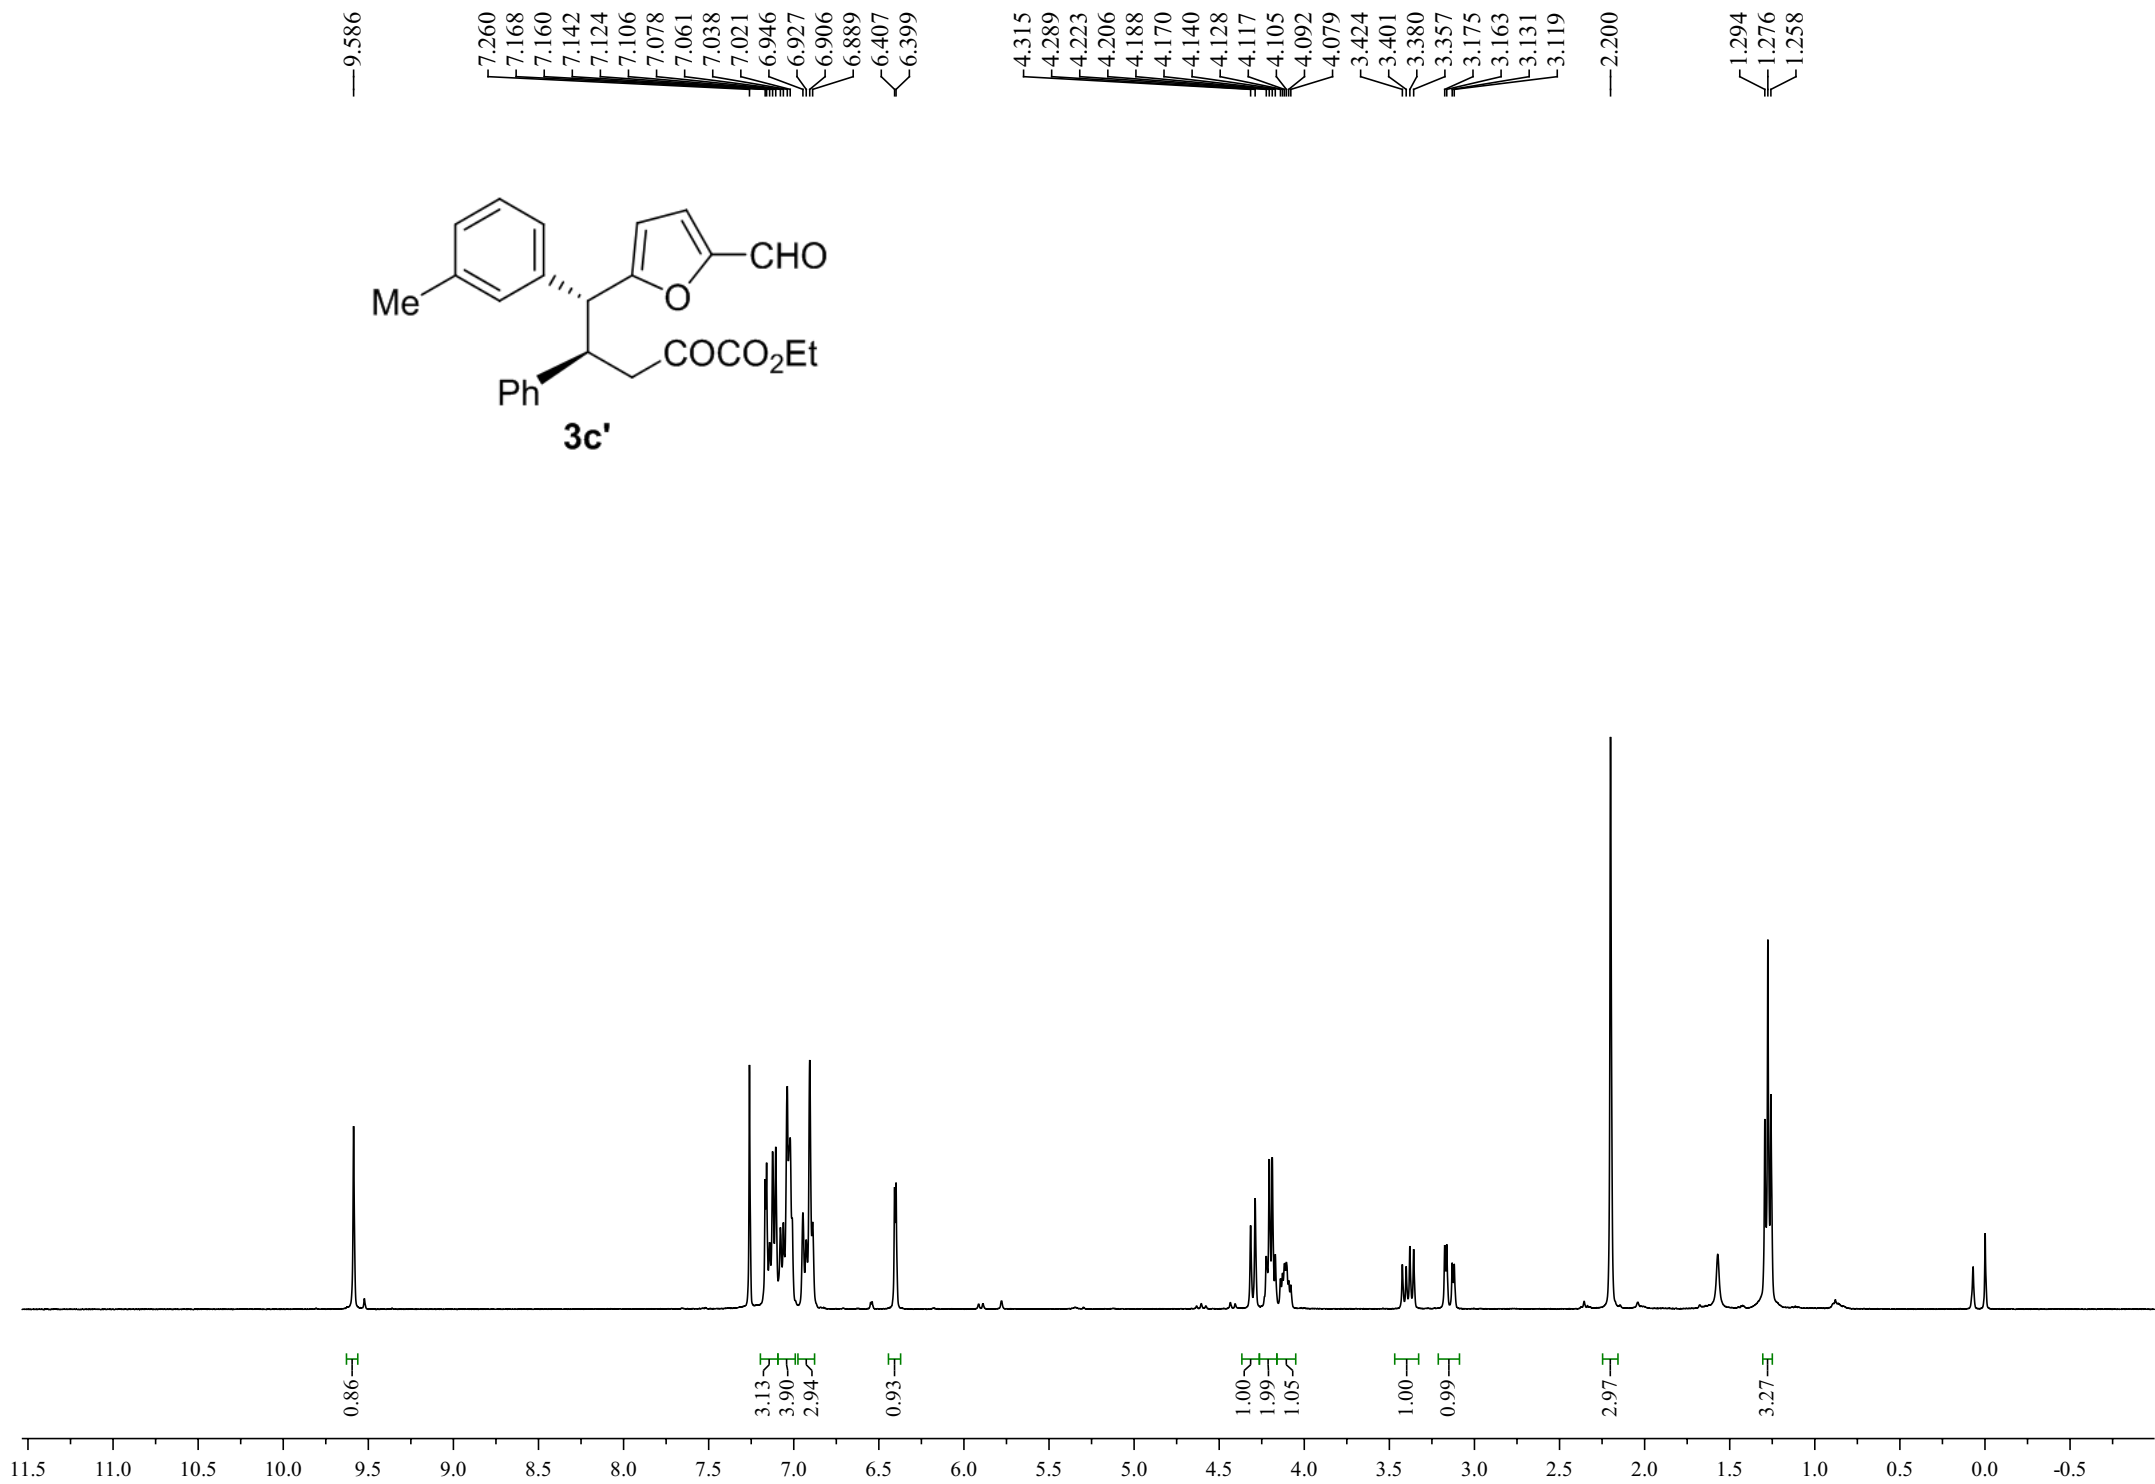

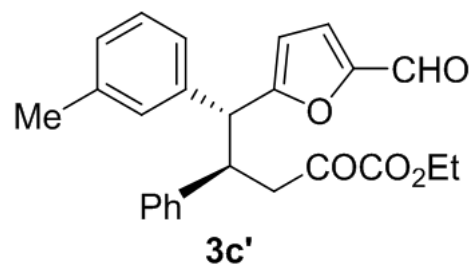

— 192.109  
— 177.256  
— 162.679  
— 160.477  
— 152.210  
— 140.432  
— 138.133  
— 137.968  
— 129.289  
— 128.265  
— 128.157  
— 127.862  
— 126.866  
— 125.500  
— 110.431

— 62.513  
— 51.559  
— 45.005  
— 44.008

— 21.313  
— 13.871

240 230 220 210 200 190 180 170 160 150 140 130 120 110 100 90 80 70 60 50 40 30 20 10 0 -10

S131

9.407  
 7.347  
 7.327  
 7.260  
 7.228  
 7.223  
 7.203  
 7.185  
 7.173  
 7.154  
 7.133  
 7.129  
 7.124  
 7.118  
 7.112  
 6.905  
 6.896  
 6.064  
 6.055  
 4.283  
 4.254  
 4.161  
 4.144  
 4.134  
 4.125  
 4.116  
 4.108  
 4.091  
 4.081  
 3.289  
 3.245  
 3.221  
 2.968  
 2.958  
 2.924  
 2.914  
 2.326  
 1.252  
 1.234  
 1.216

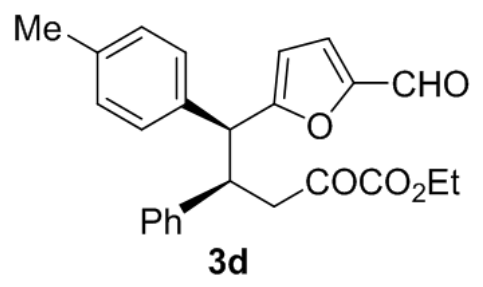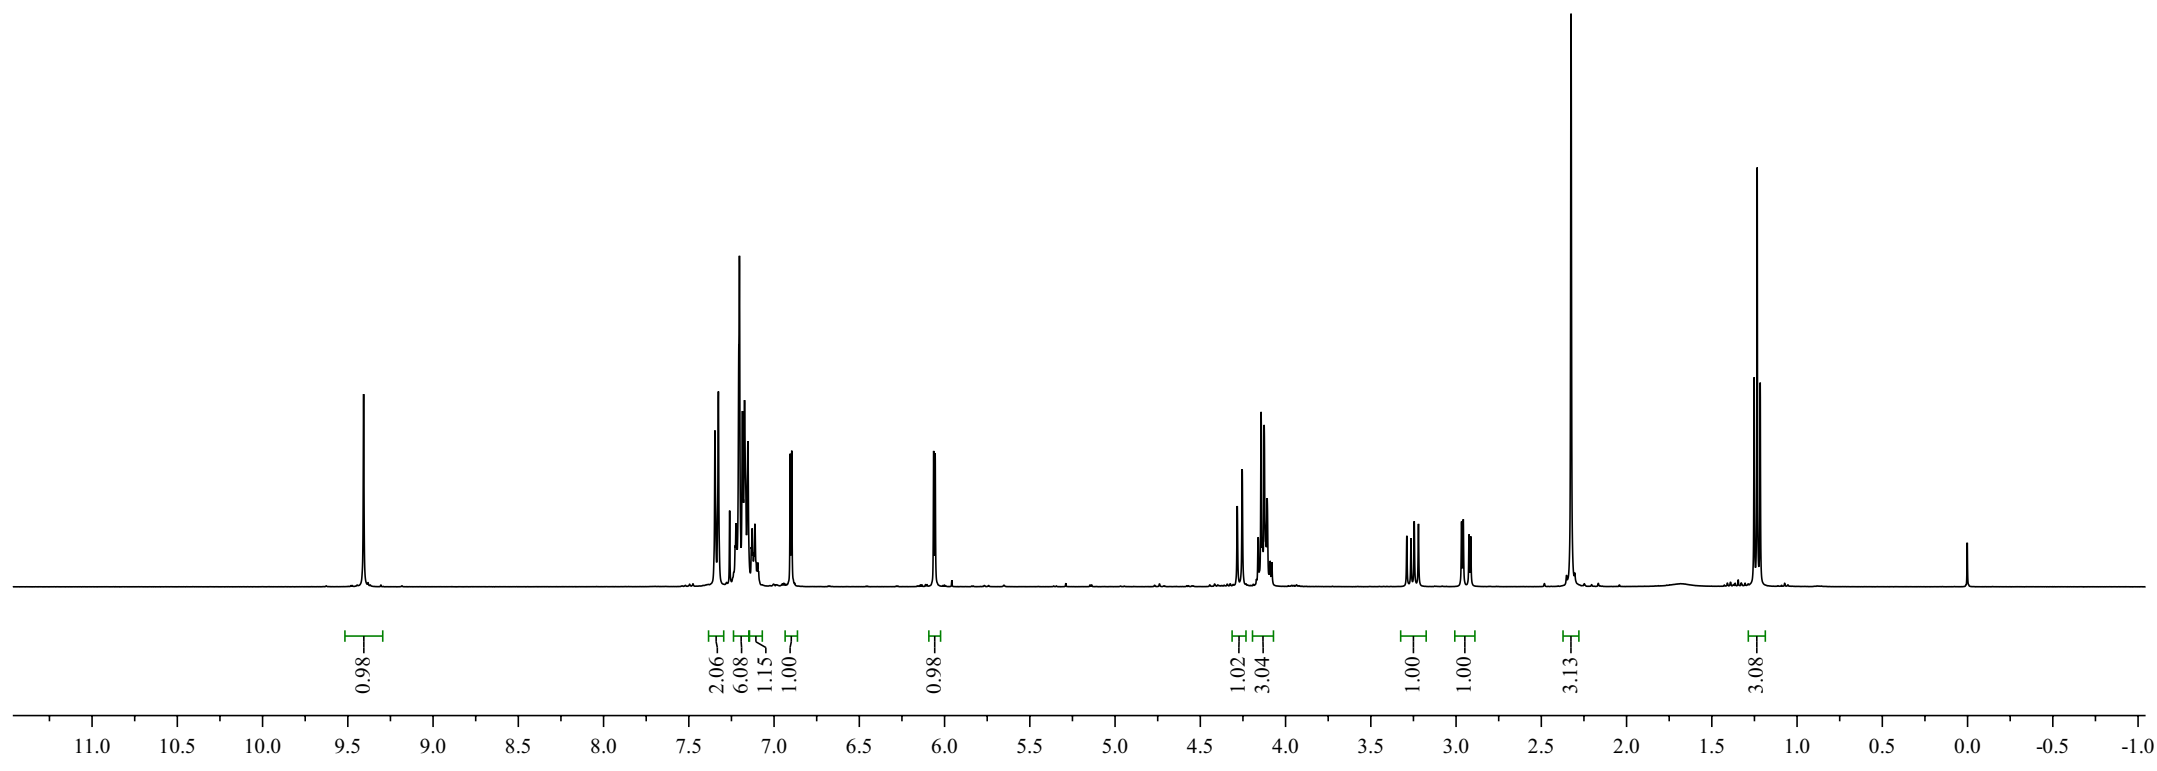

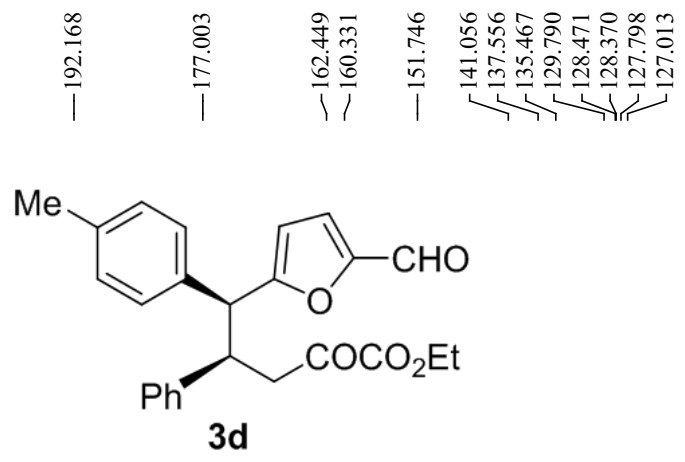

—192.168

—177.003

—162.449

—160.331

—151.746

—141.056

—137.556

—135.467

—129.790

—128.471

—128.370

—127.798

—127.013

—109.765

—62.345

—51.704

—44.922

—43.808

—21.020

—13.803

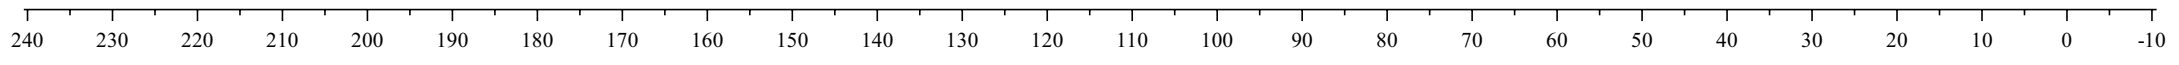

9.573  
 7.258  
 7.152  
 7.143  
 7.125  
 7.121  
 7.106  
 7.080  
 7.077  
 7.062  
 7.055  
 7.048  
 7.044  
 7.031  
 7.028  
 7.011  
 6.949  
 6.930  
 6.392  
 6.383  
 4.329  
 4.302  
 4.218  
 4.216  
 4.200  
 4.198  
 4.182  
 4.180  
 4.164  
 4.137  
 4.125  
 4.114  
 4.110  
 4.102  
 4.098  
 3.405  
 3.383  
 3.361  
 3.339  
 3.169  
 3.157  
 3.125  
 3.113  
 2.197  
 1.287  
 1.270  
 1.252

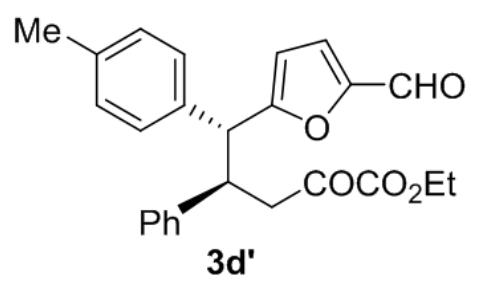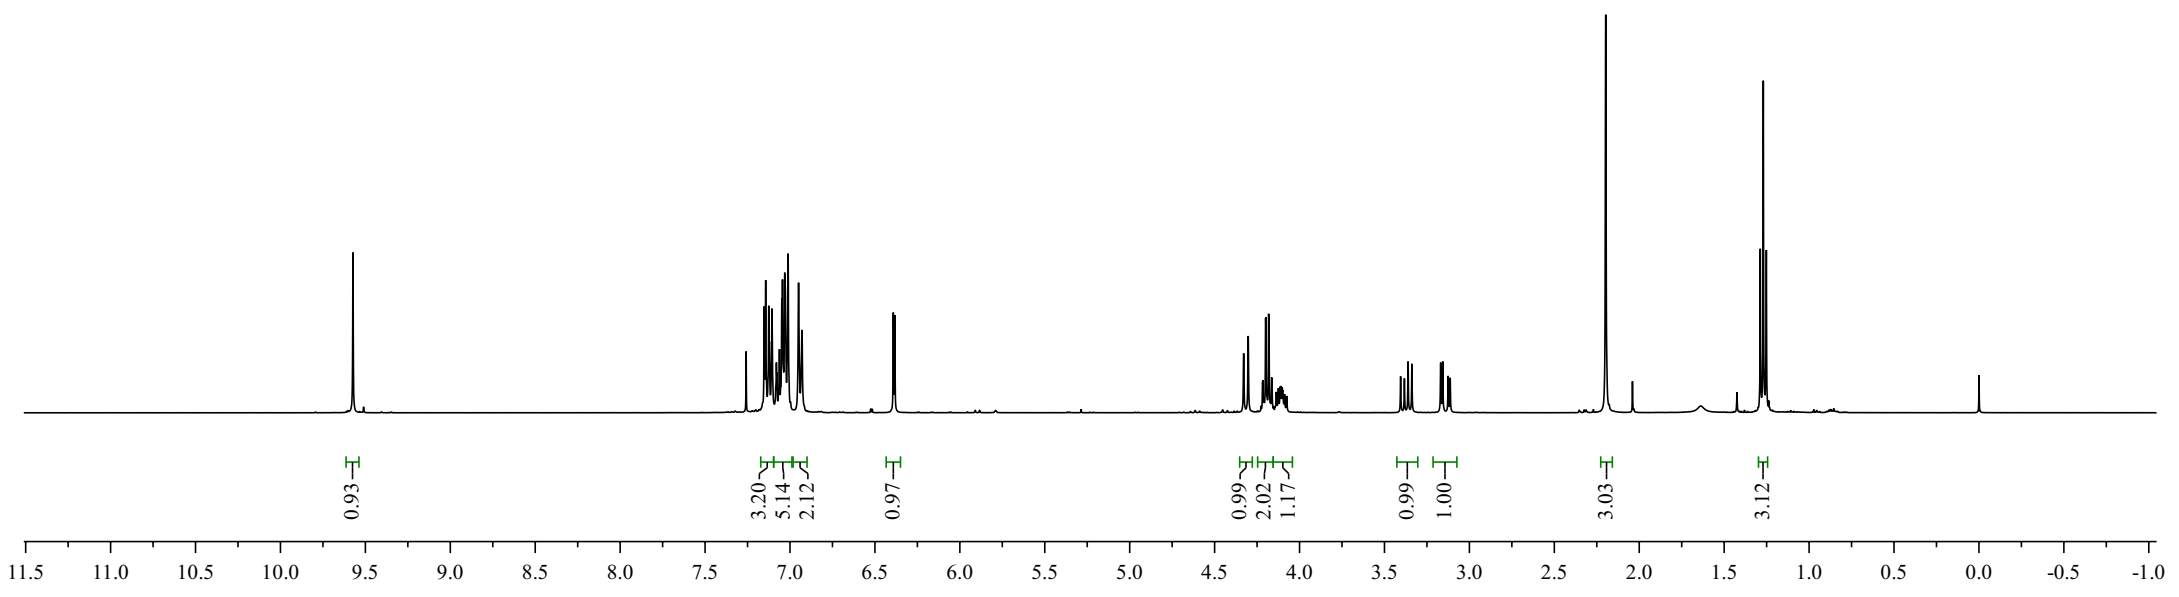

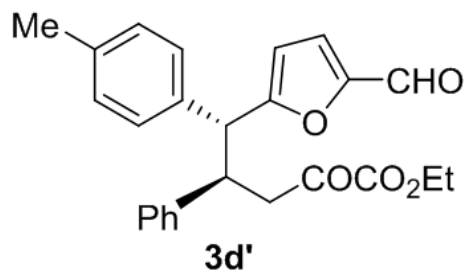

—192.077

—177.212

—162.775

—160.460

—152.183

—140.482

—136.702

—135.179

—129.077

—128.336

—128.275

—128.155

—126.824

—110.328

—62.467

—51.202

—45.035

—44.055

—20.918

—13.843

240 230 220 210 200 190 180 170 160 150 140 130 120 110 100 90 80 70 60 50 40 30 20 10 0 -10

S135

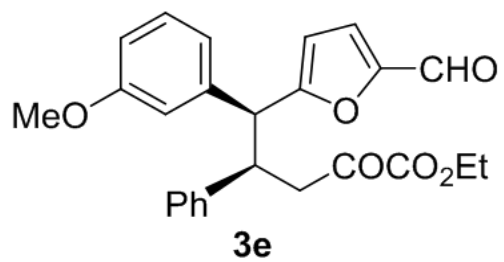

9.332  
 7.359 7.341 7.311 7.292 7.272 7.225 7.216 7.201 7.182 7.163 7.111 7.101 7.081 7.062 6.860 6.855 6.840 6.835 6.513 6.504  
 4.585 4.555  
 4.082 4.064 4.046 4.028 3.761  
 3.254 3.228 2.876 2.866 2.833 2.823  
 1.160 1.142 1.124

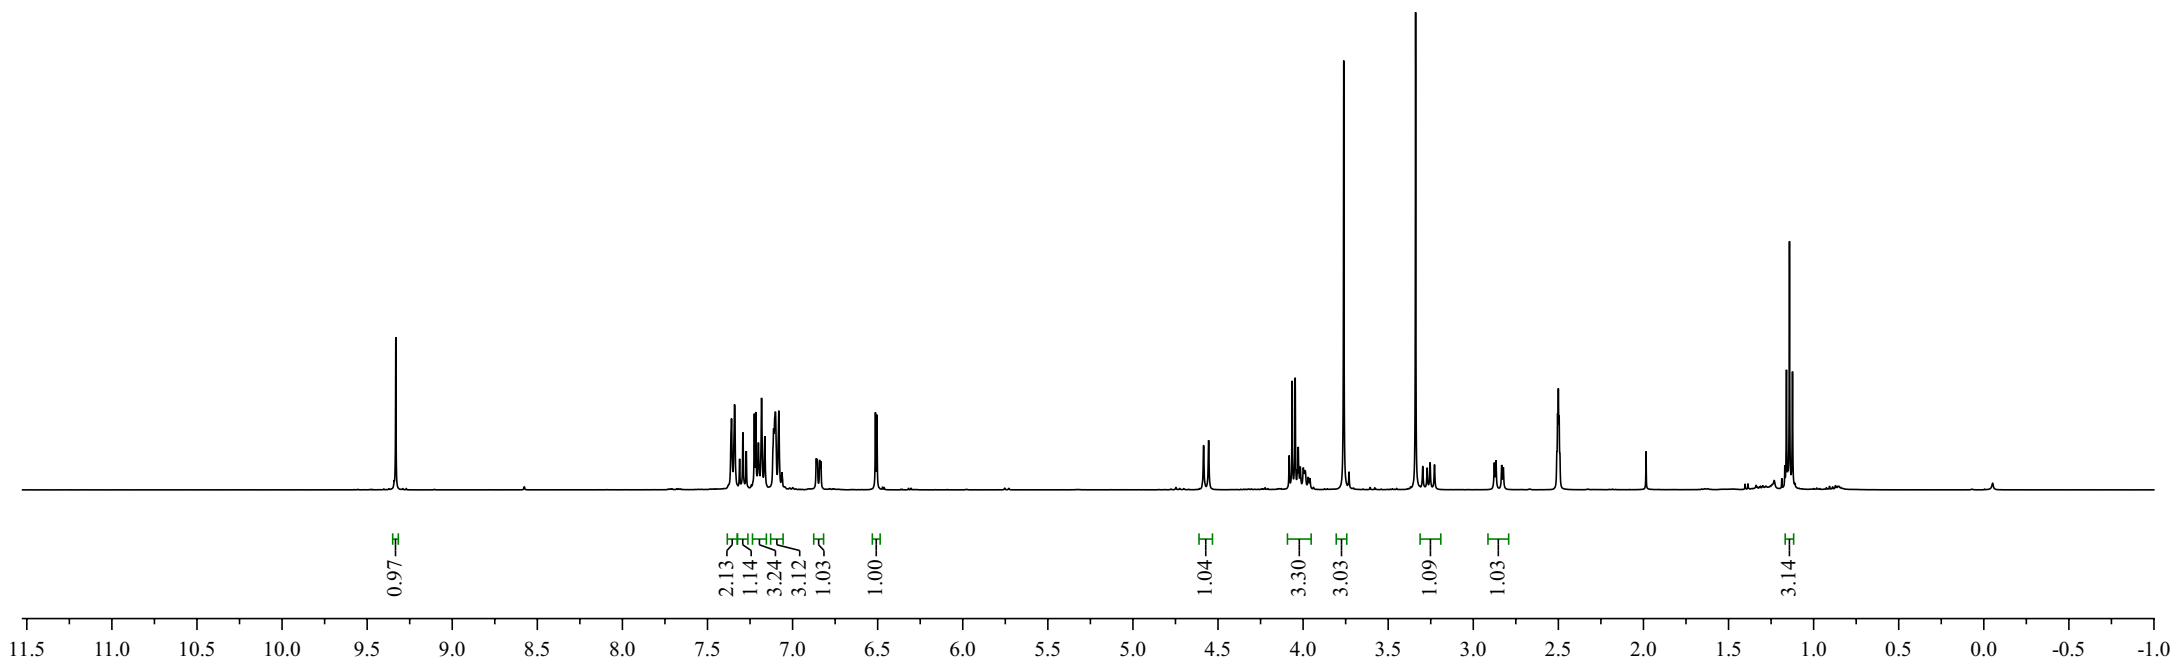



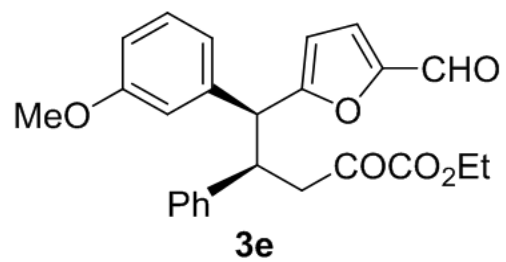

—192.136  
—177.359  
162.609  
159.941  
159.470  
—150.991  
141.779  
141.021  
129.941  
128.049  
126.566  
120.541  
114.492  
112.495  
110.046

—61.653  
55.026  
50.374  
44.221  
43.442

—13.637

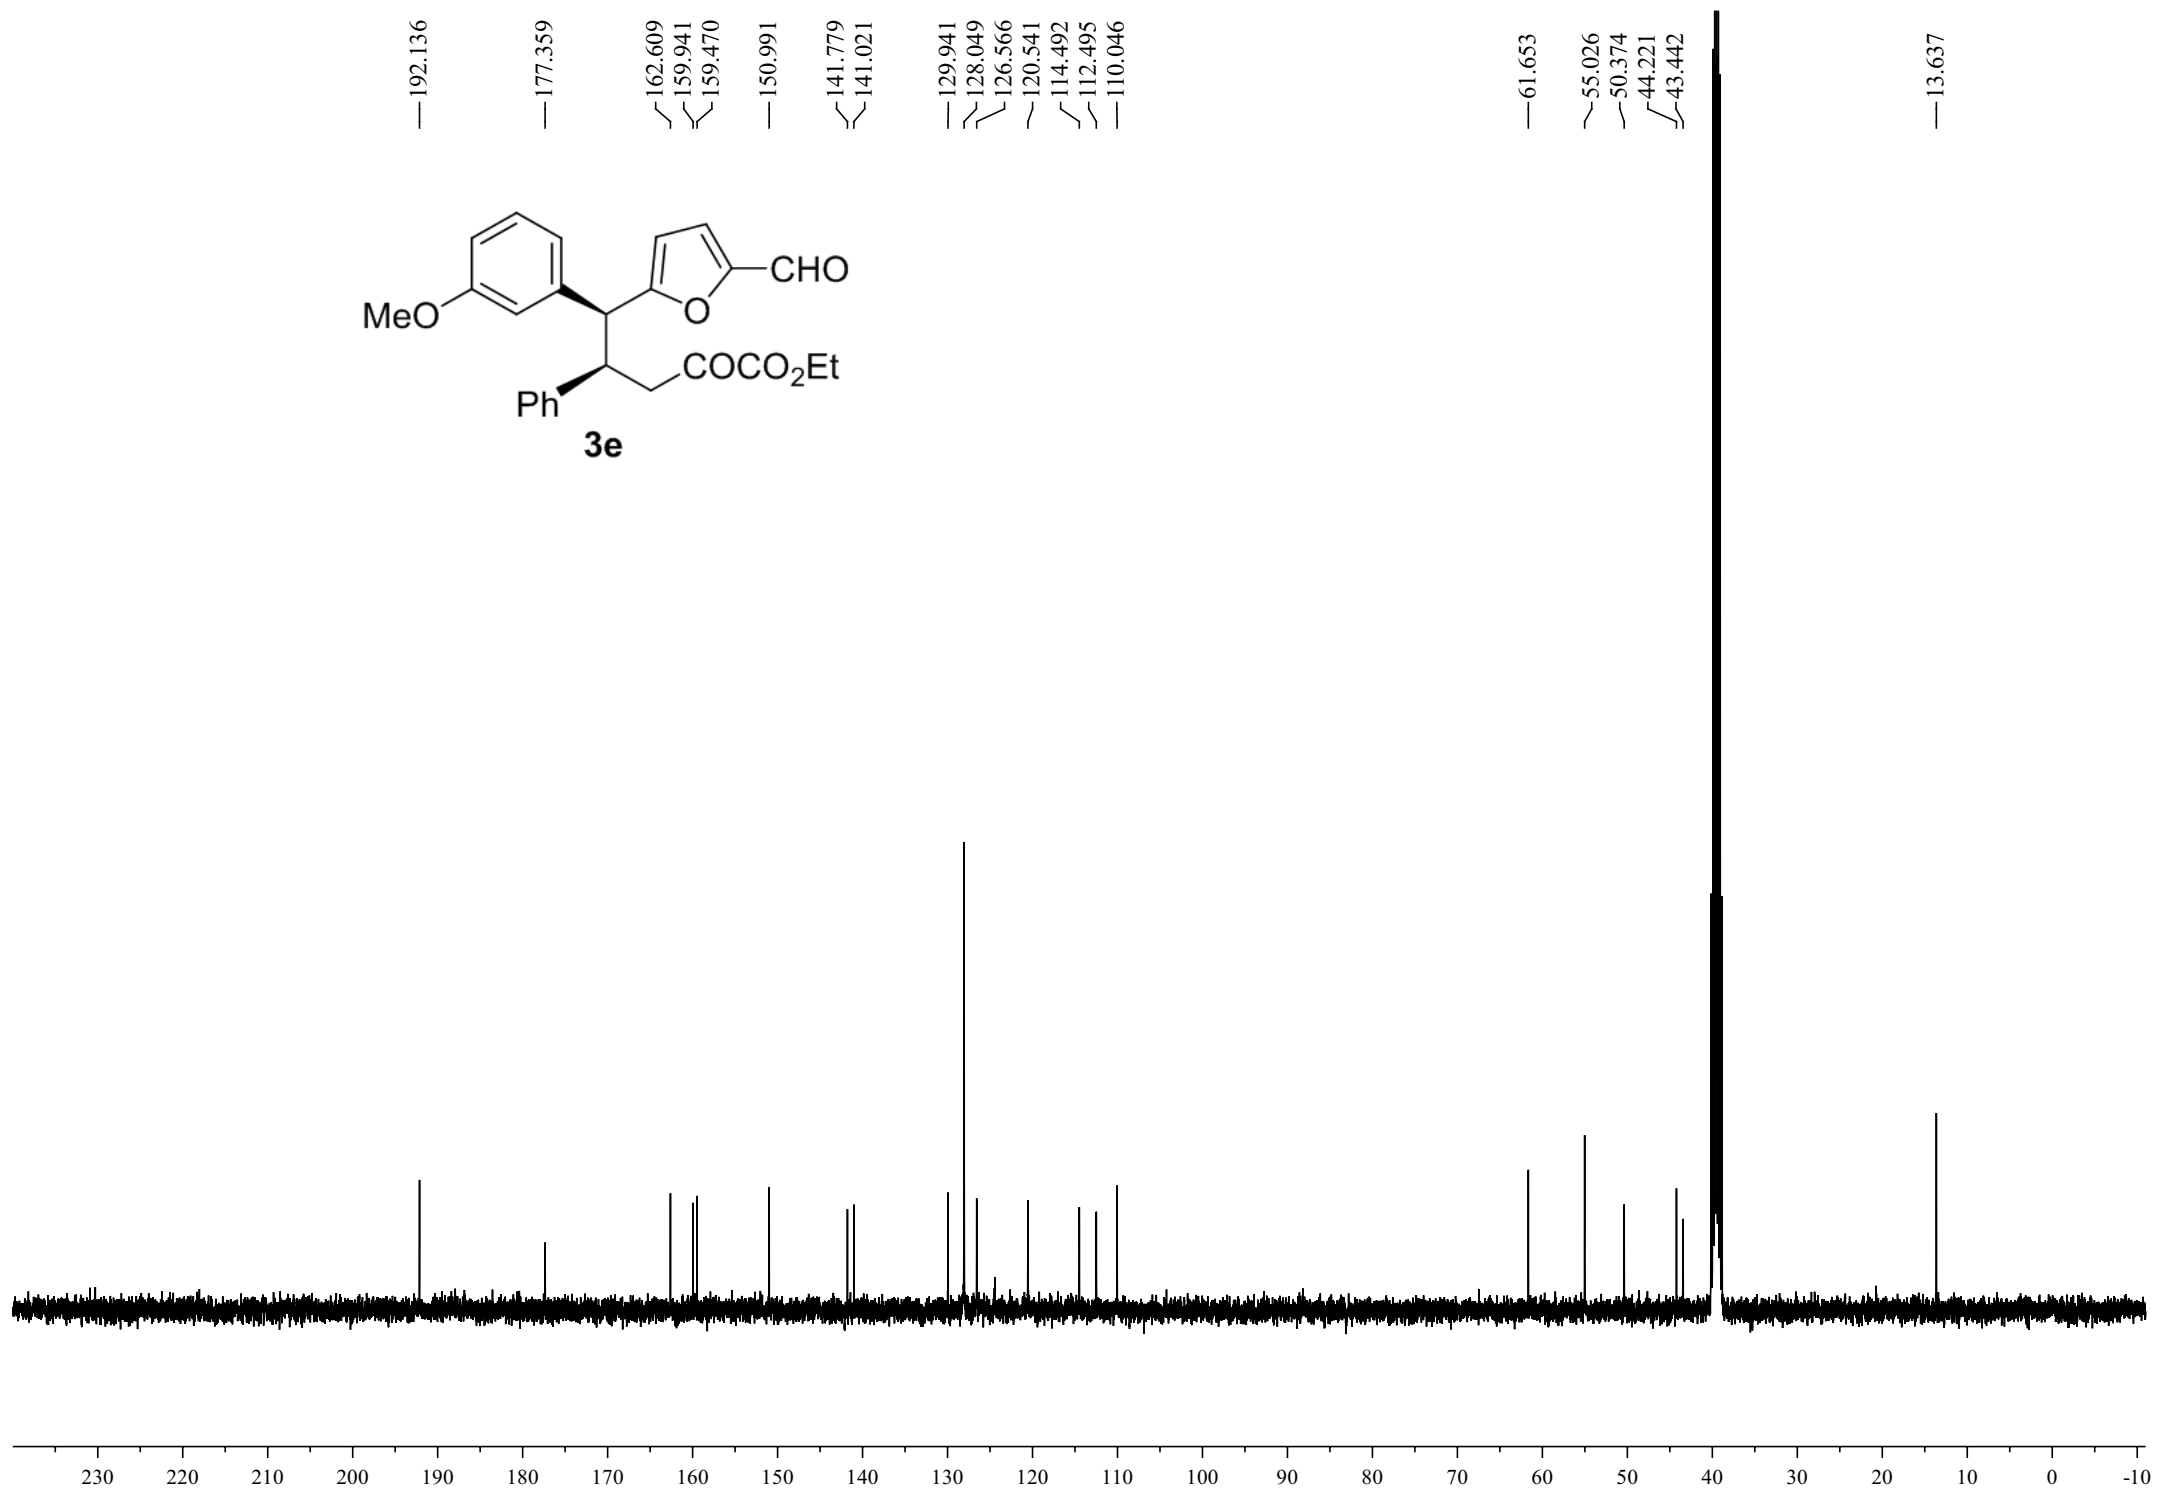

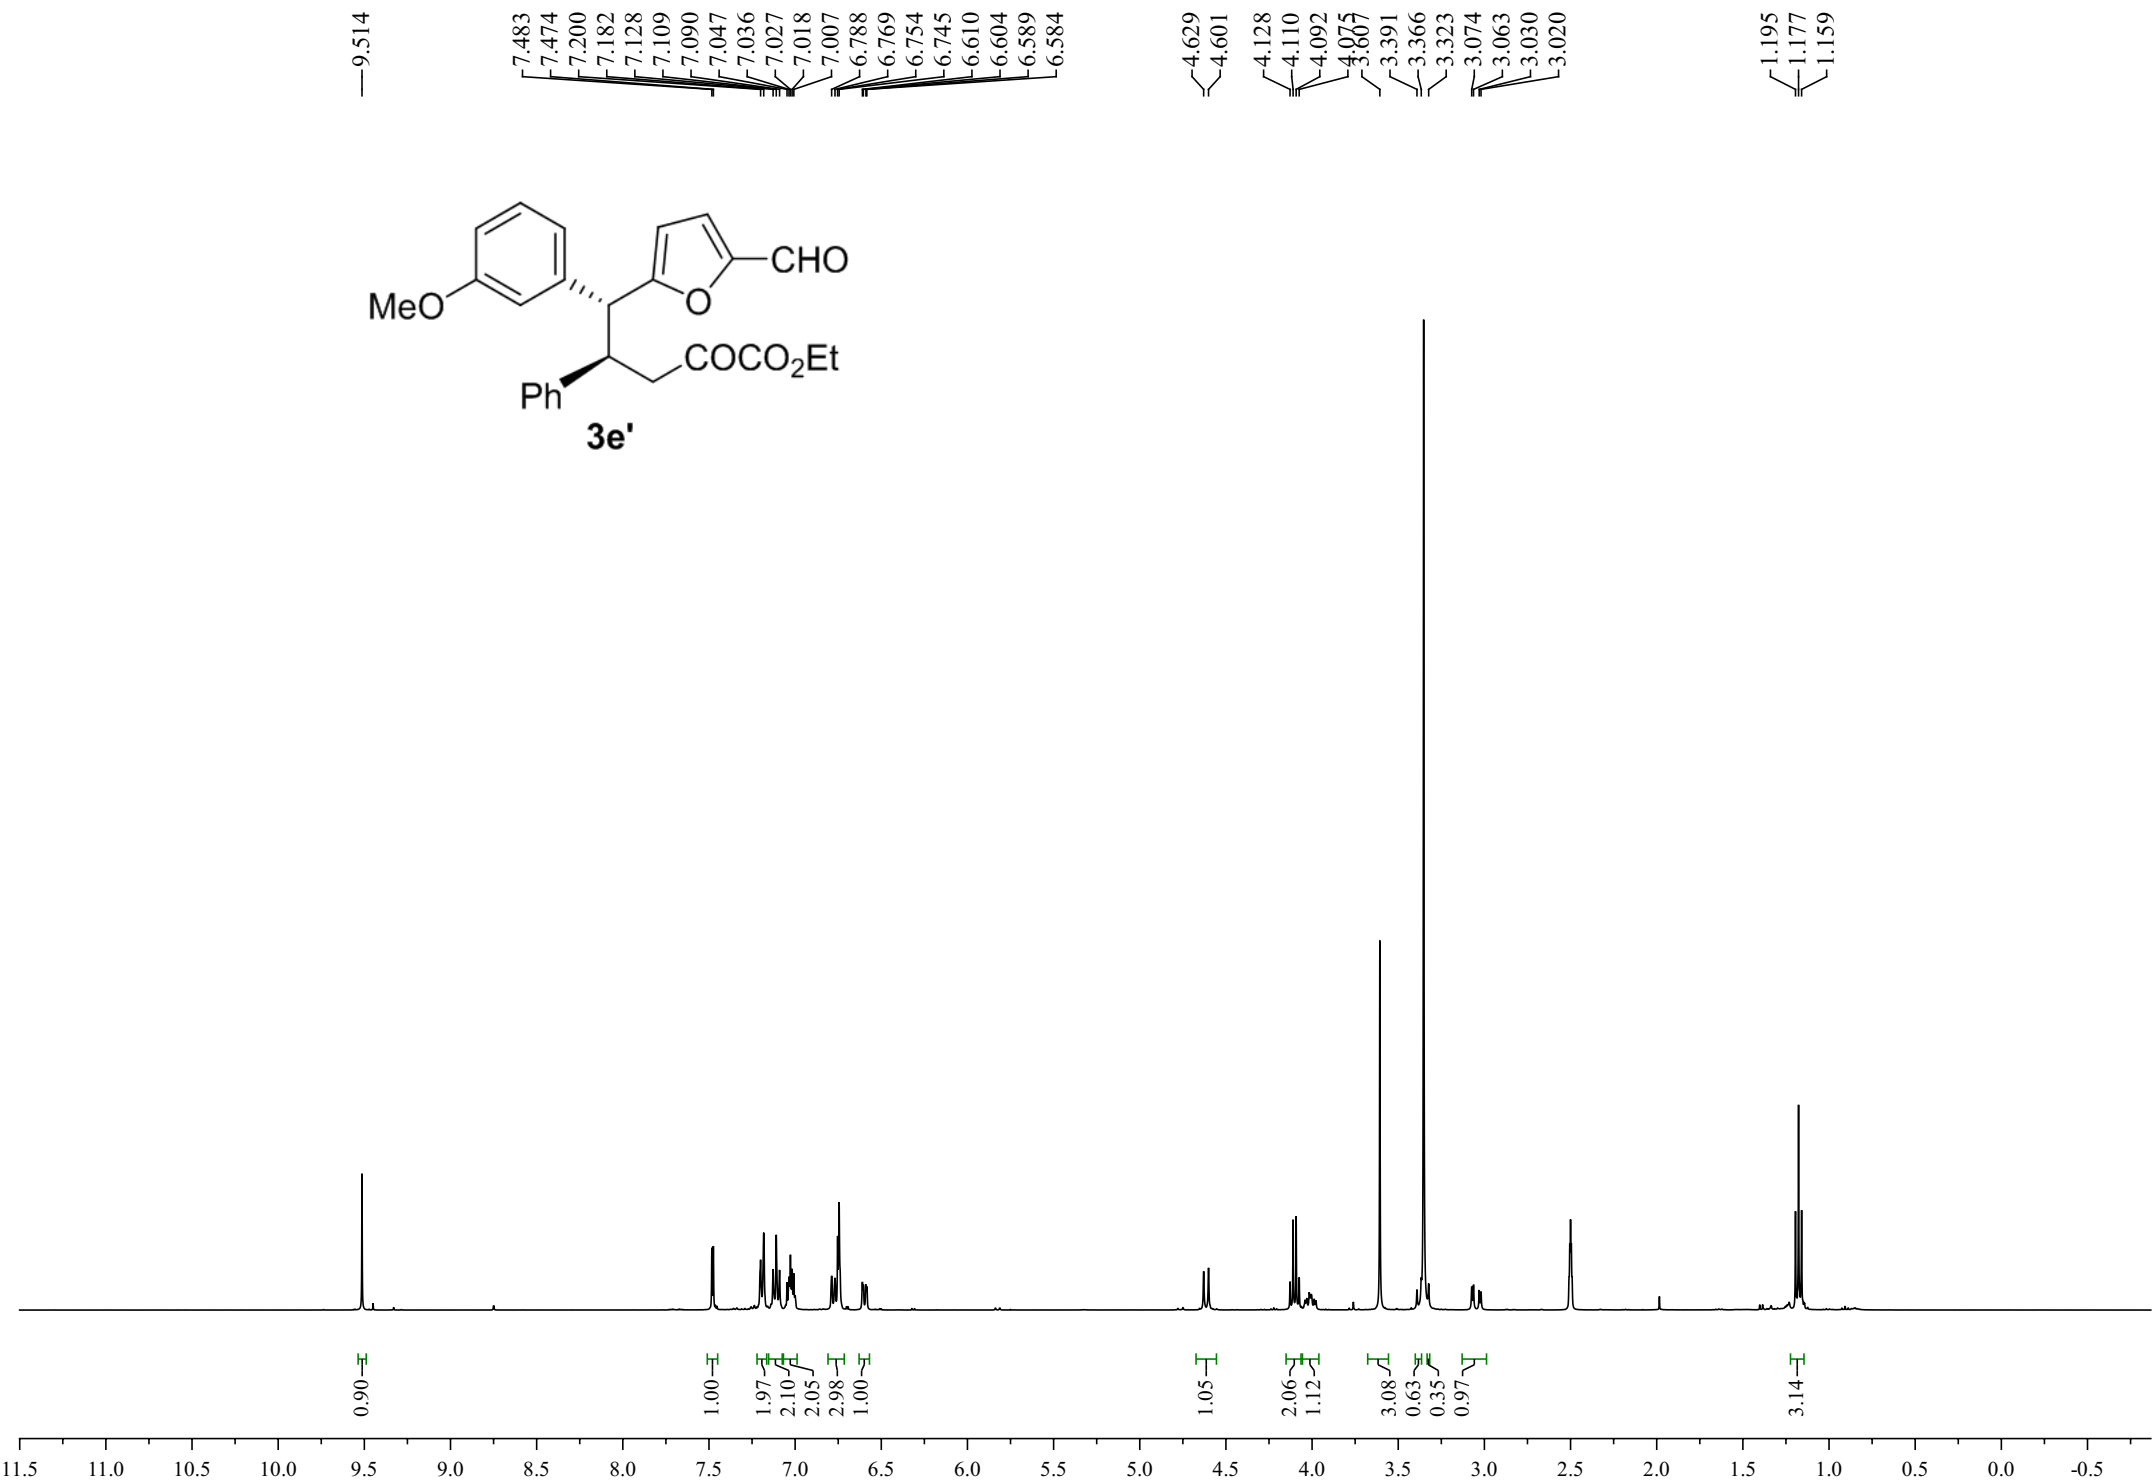

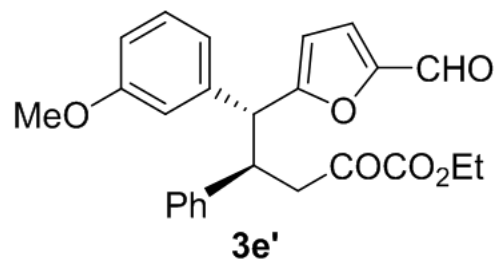

—191.872

—177.705

—162.545

—159.989

—158.860

—151.789

—141.082

—140.633

—129.168

—128.340

—127.909

—126.386

—120.712

—114.415

—111.863

—110.509

—61.749

—54.844

—49.892

—44.190

—43.974

—13.700

240 230 220 210 200 190 180 170 160 150 140 130 120 110 100 90 80 70 60 50 40 30 20 10 0 -10

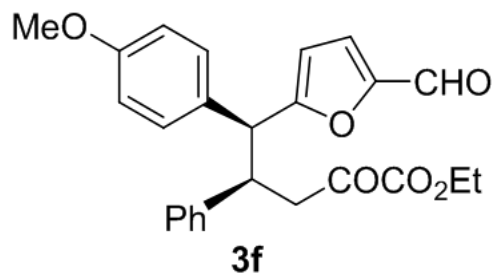

9.326  
 7.438  
 7.423  
 7.419  
 7.342  
 7.330  
 7.212  
 7.206  
 7.191  
 7.179  
 7.166  
 7.091  
 7.079  
 7.067  
 6.943  
 6.928  
 6.451  
 6.445

4.547  
 4.528  
 4.074  
 4.062  
 4.050  
 4.038  
 3.731  
 3.235  
 3.218  
 2.866  
 2.859  
 2.837  
 2.830

1.154  
 1.142  
 1.130

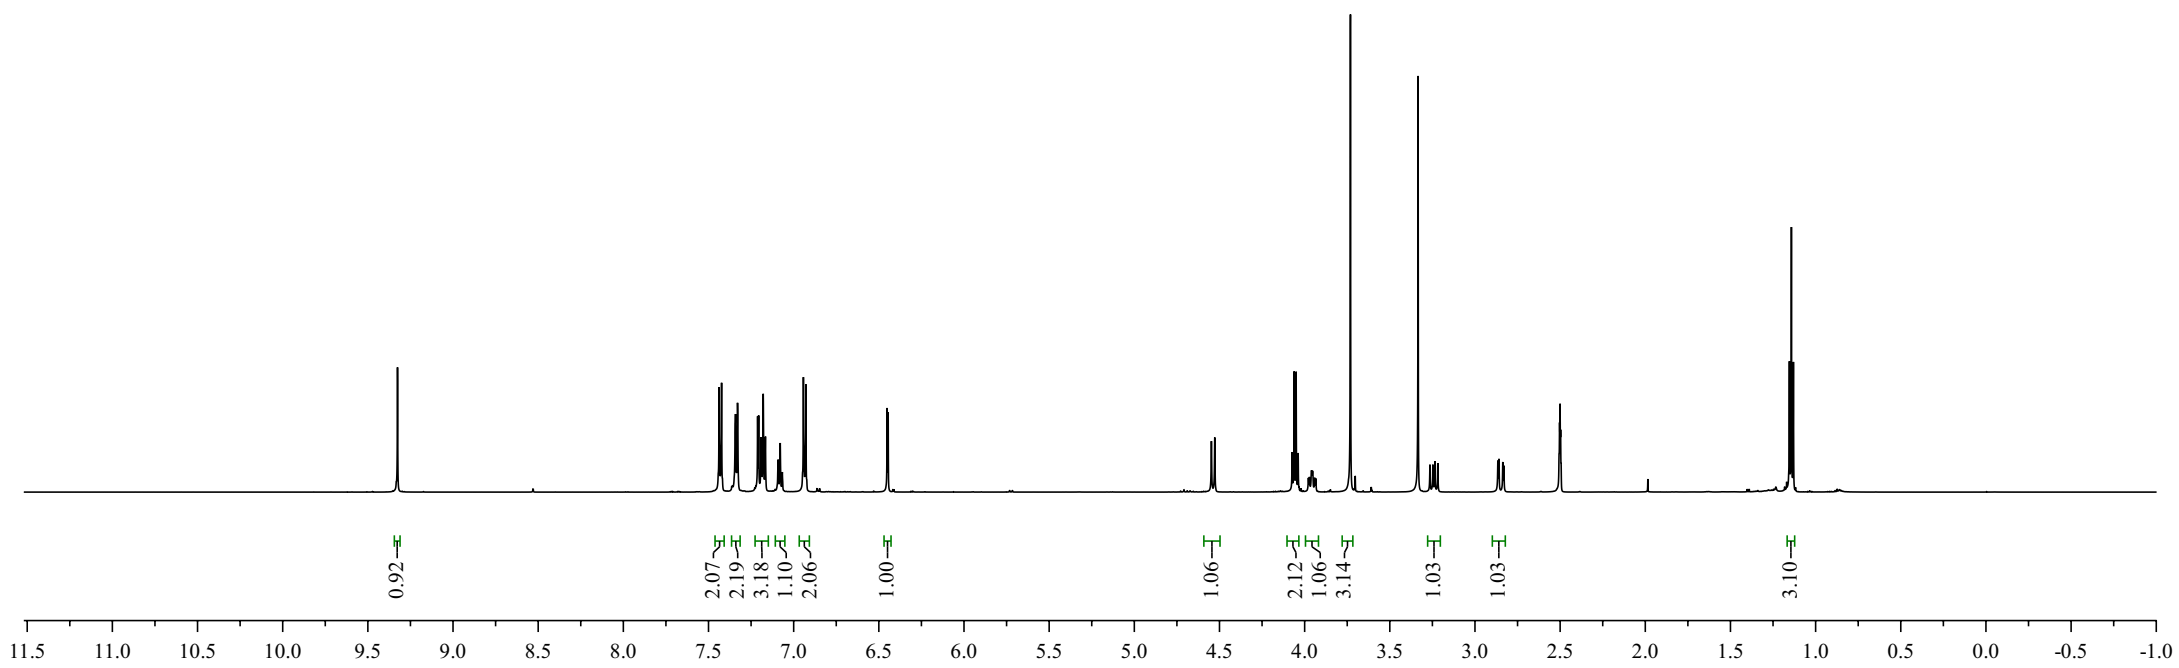

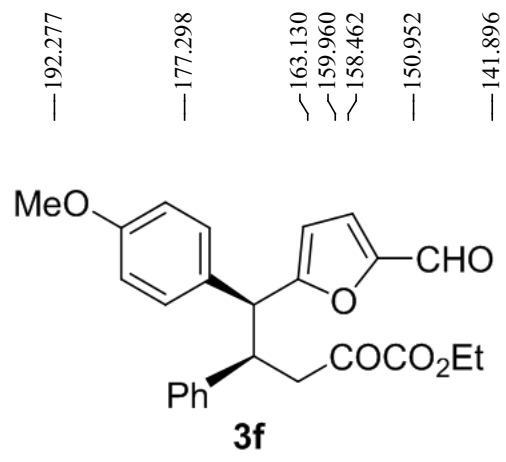

—192.277

—177.298

—163.130

—159.960

—158.462

—150.952

—141.896

—131.350

—129.544

—128.052

—128.034

—126.542

—114.236

—109.731

—61.667

—55.040

—49.640

—44.484

—43.497

—13.650

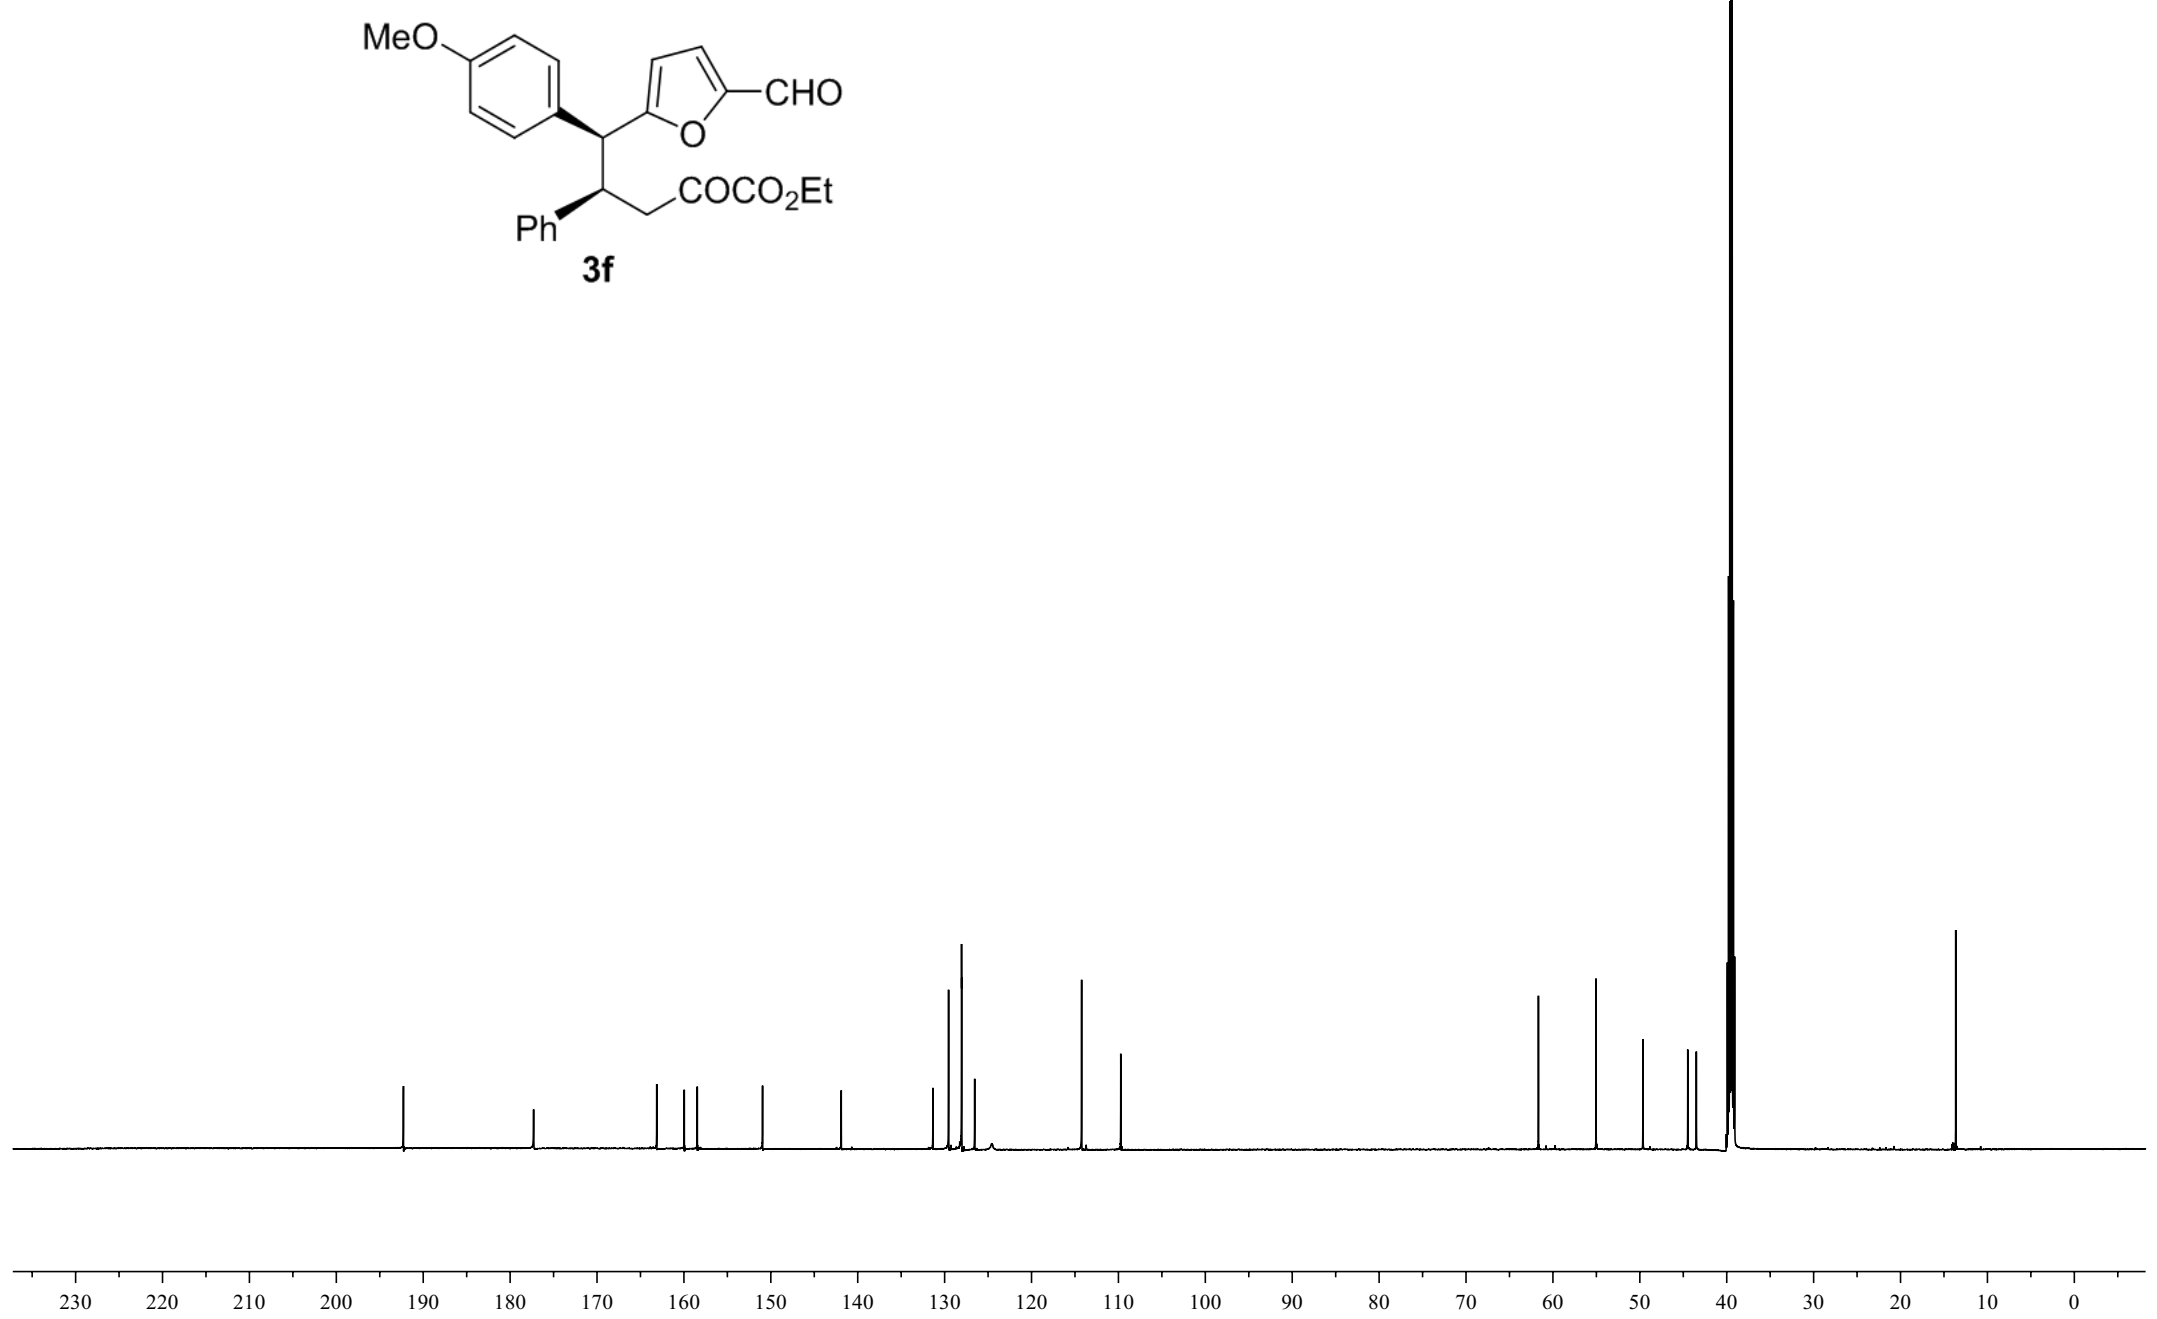

9.504  
 7.471 7.465 7.178 7.166 7.121 7.117 7.108 7.102 7.095 7.029 7.017 7.005 6.701 6.695 6.681 6.666  
 4.588 4.569  
 4.108 4.096 4.084 3.886 3.358 3.342 3.313 3.061 3.054 3.032 3.025  
 1.190 1.178 1.167

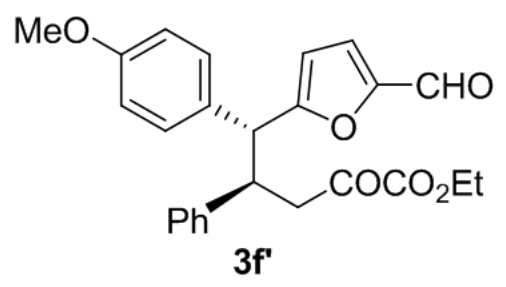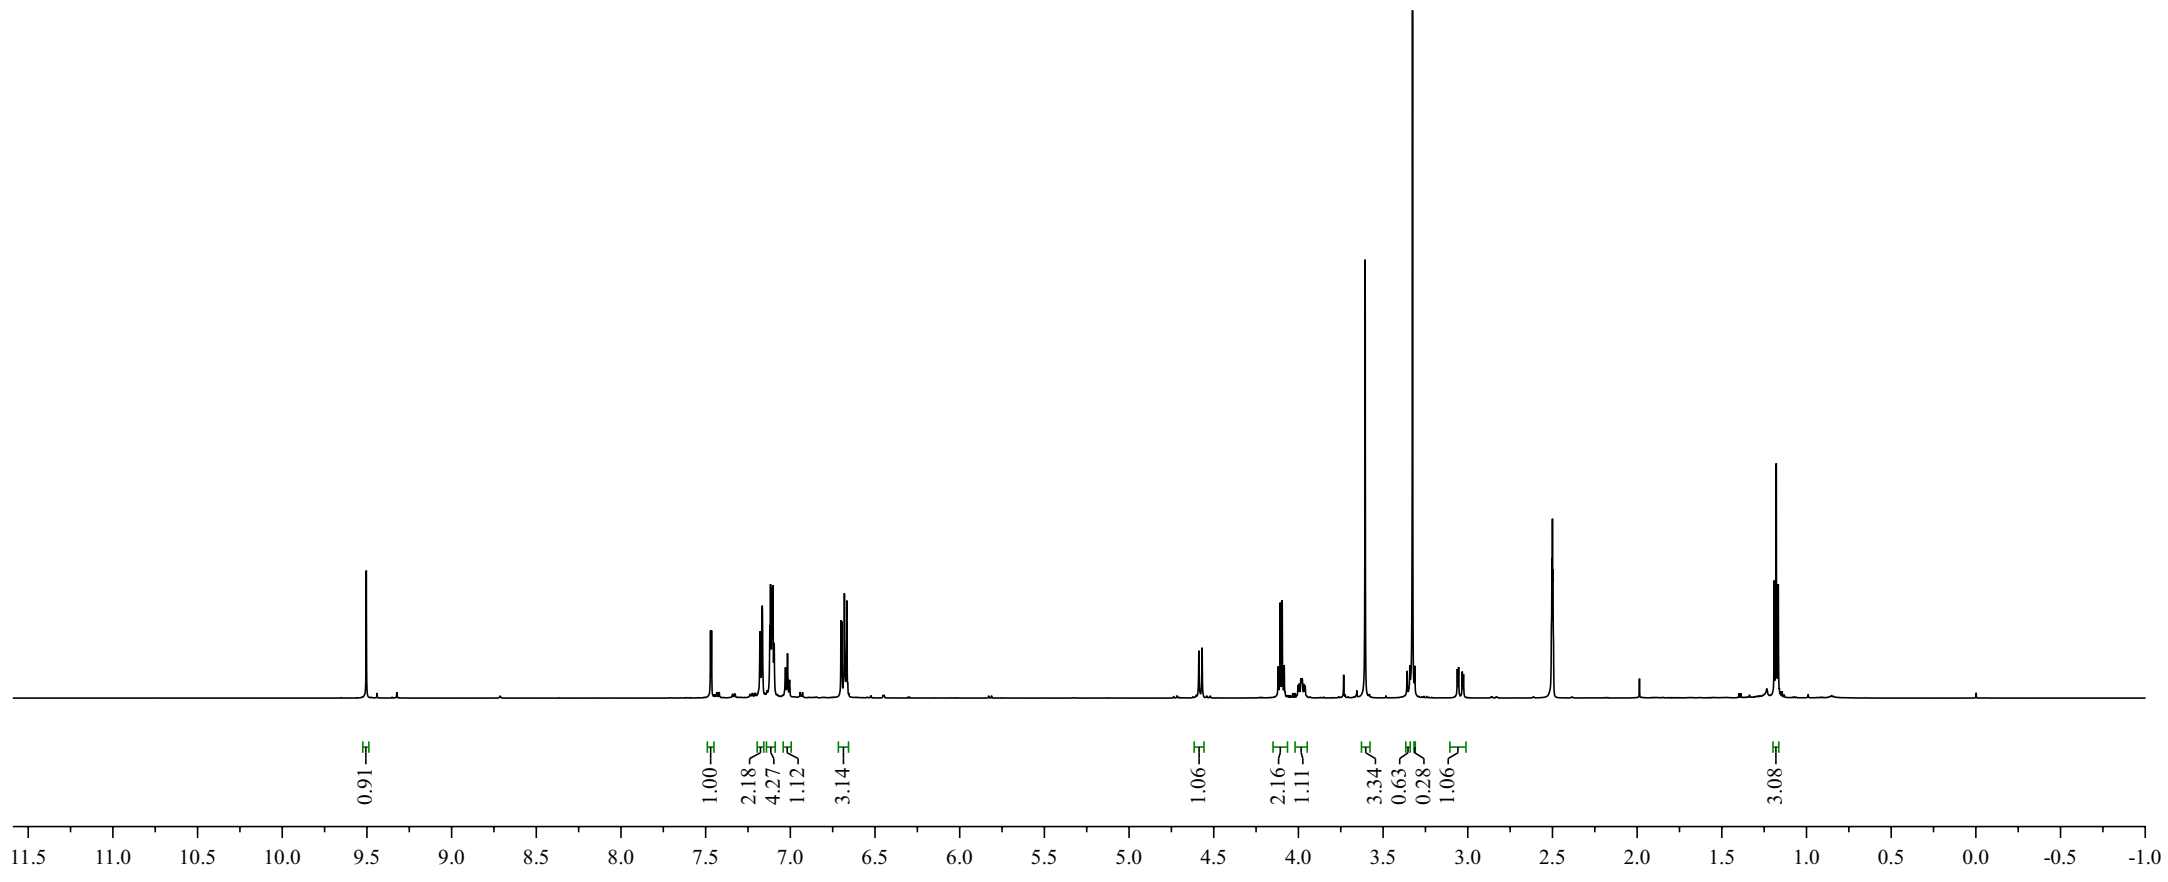

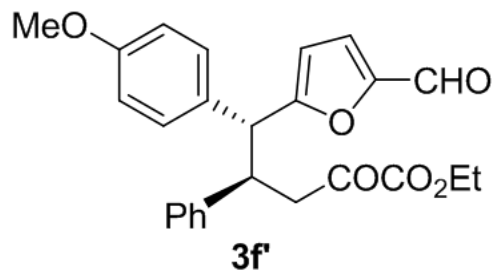

—191.883

—177.611

~163.077

~159.980

~157.720

~151.715

—141.256

~131.042

~129.461

~128.309

~127.918

~126.330

—113.523

—110.167

—61.720

~54.814

~49.139

~44.305

~44.012

—13.694

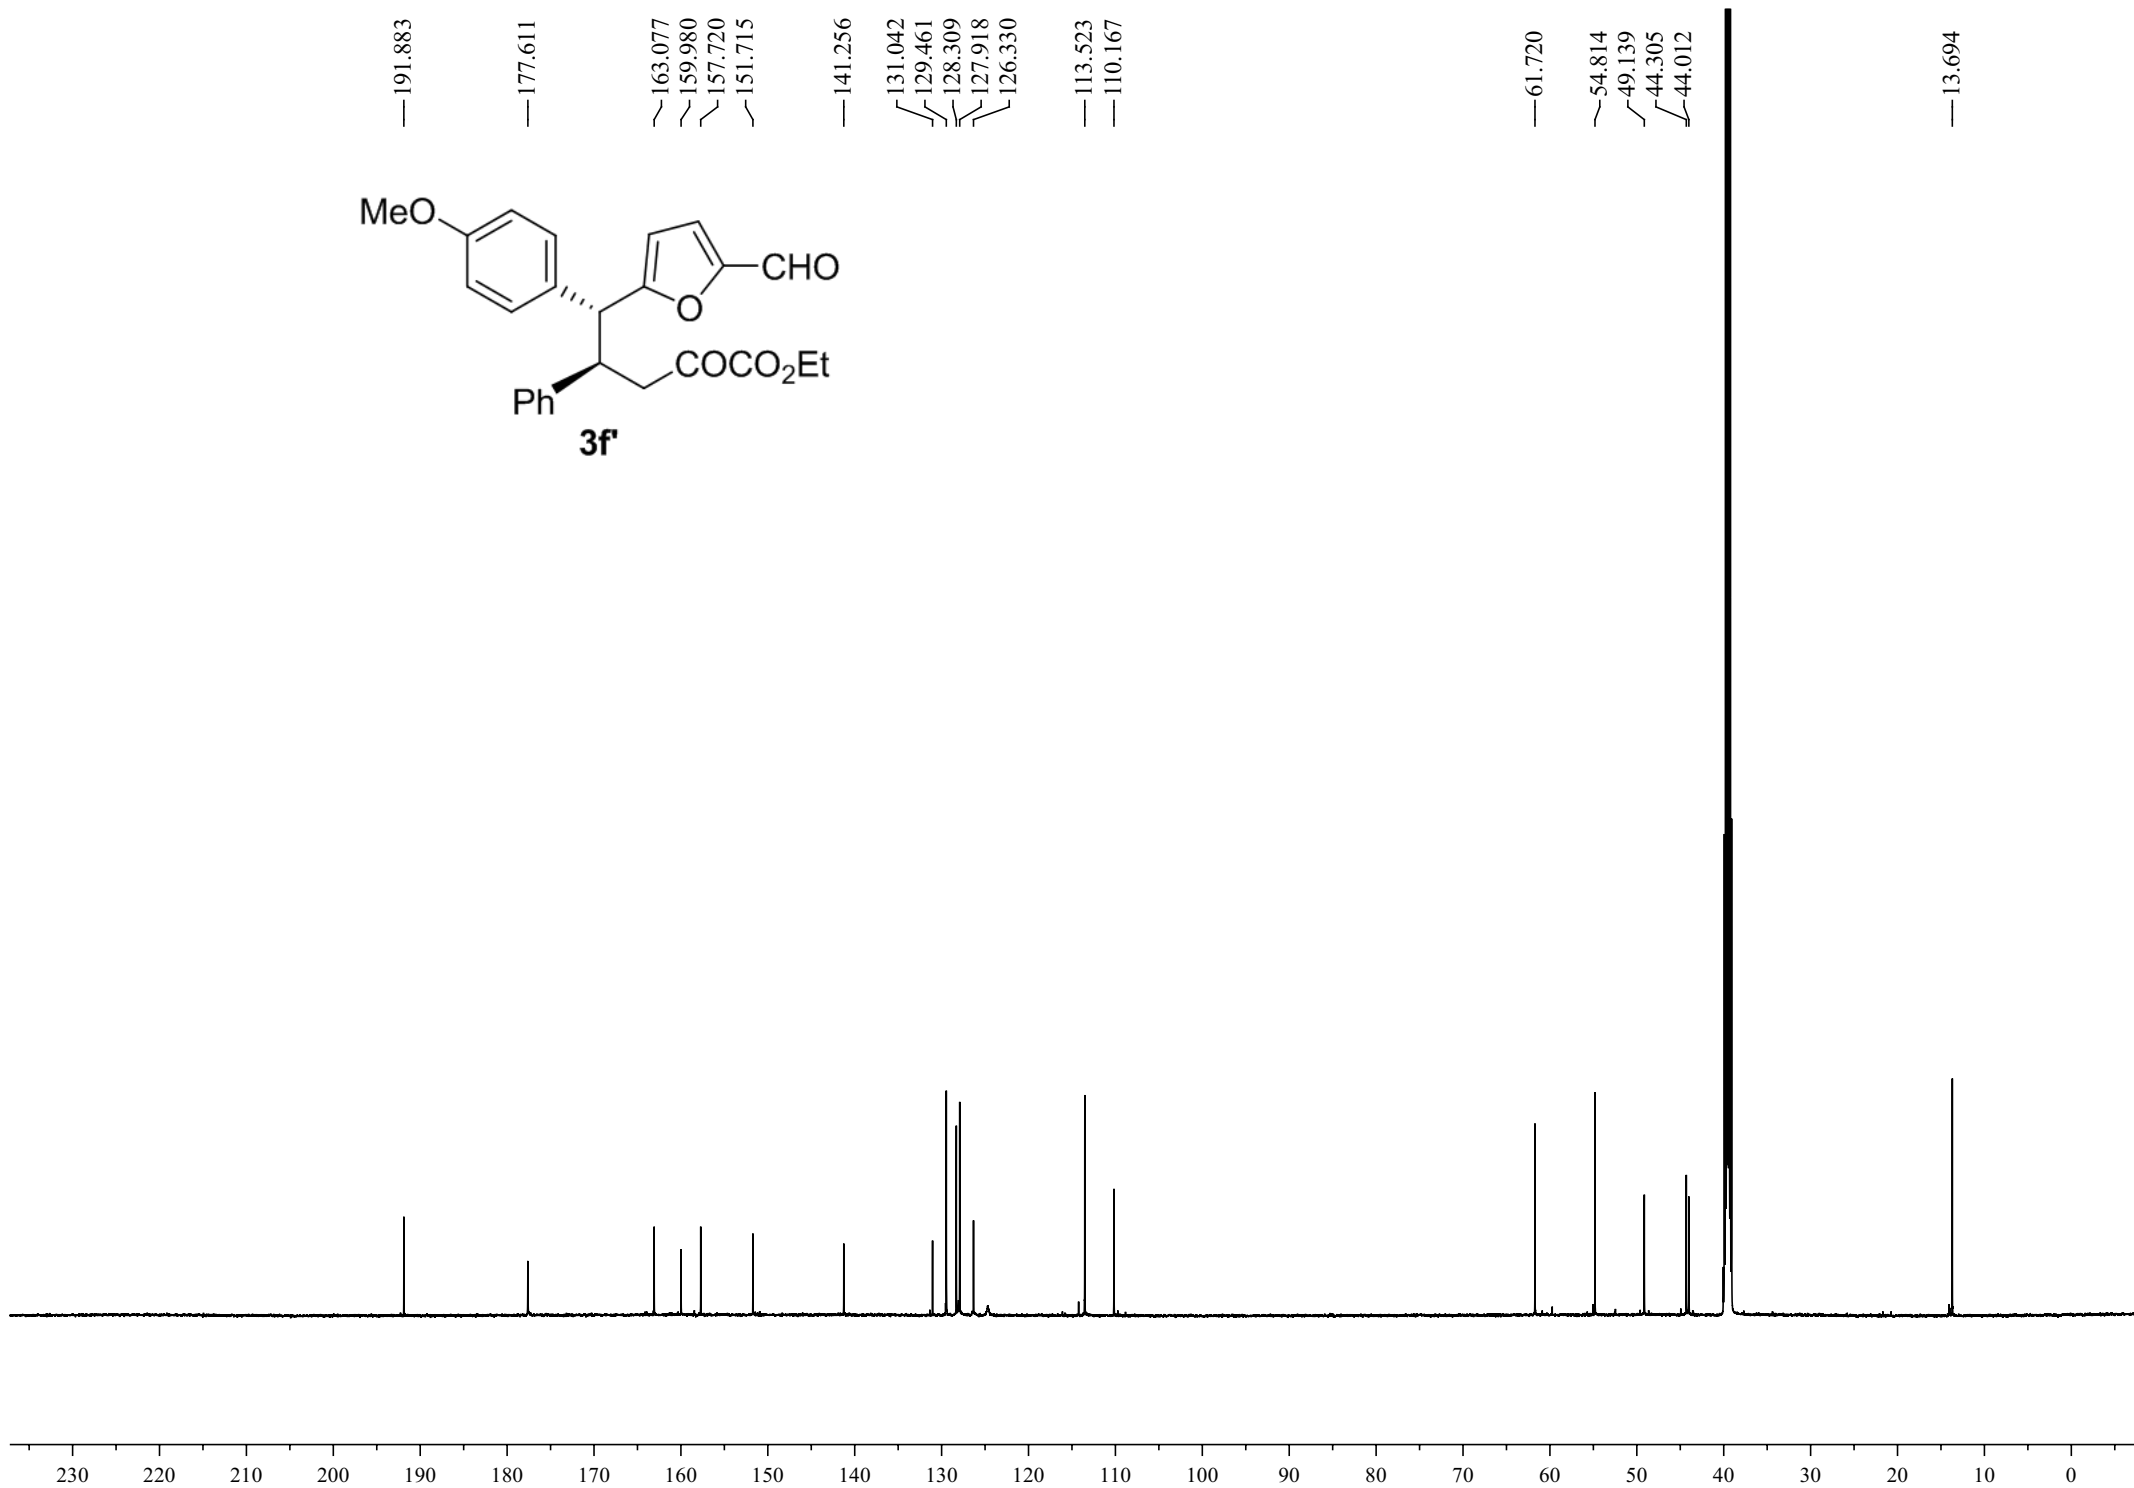

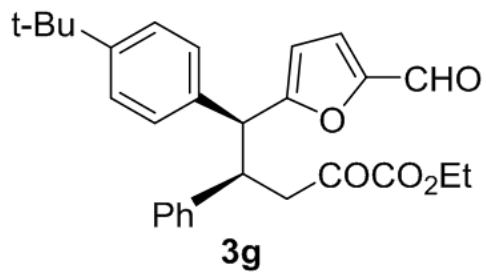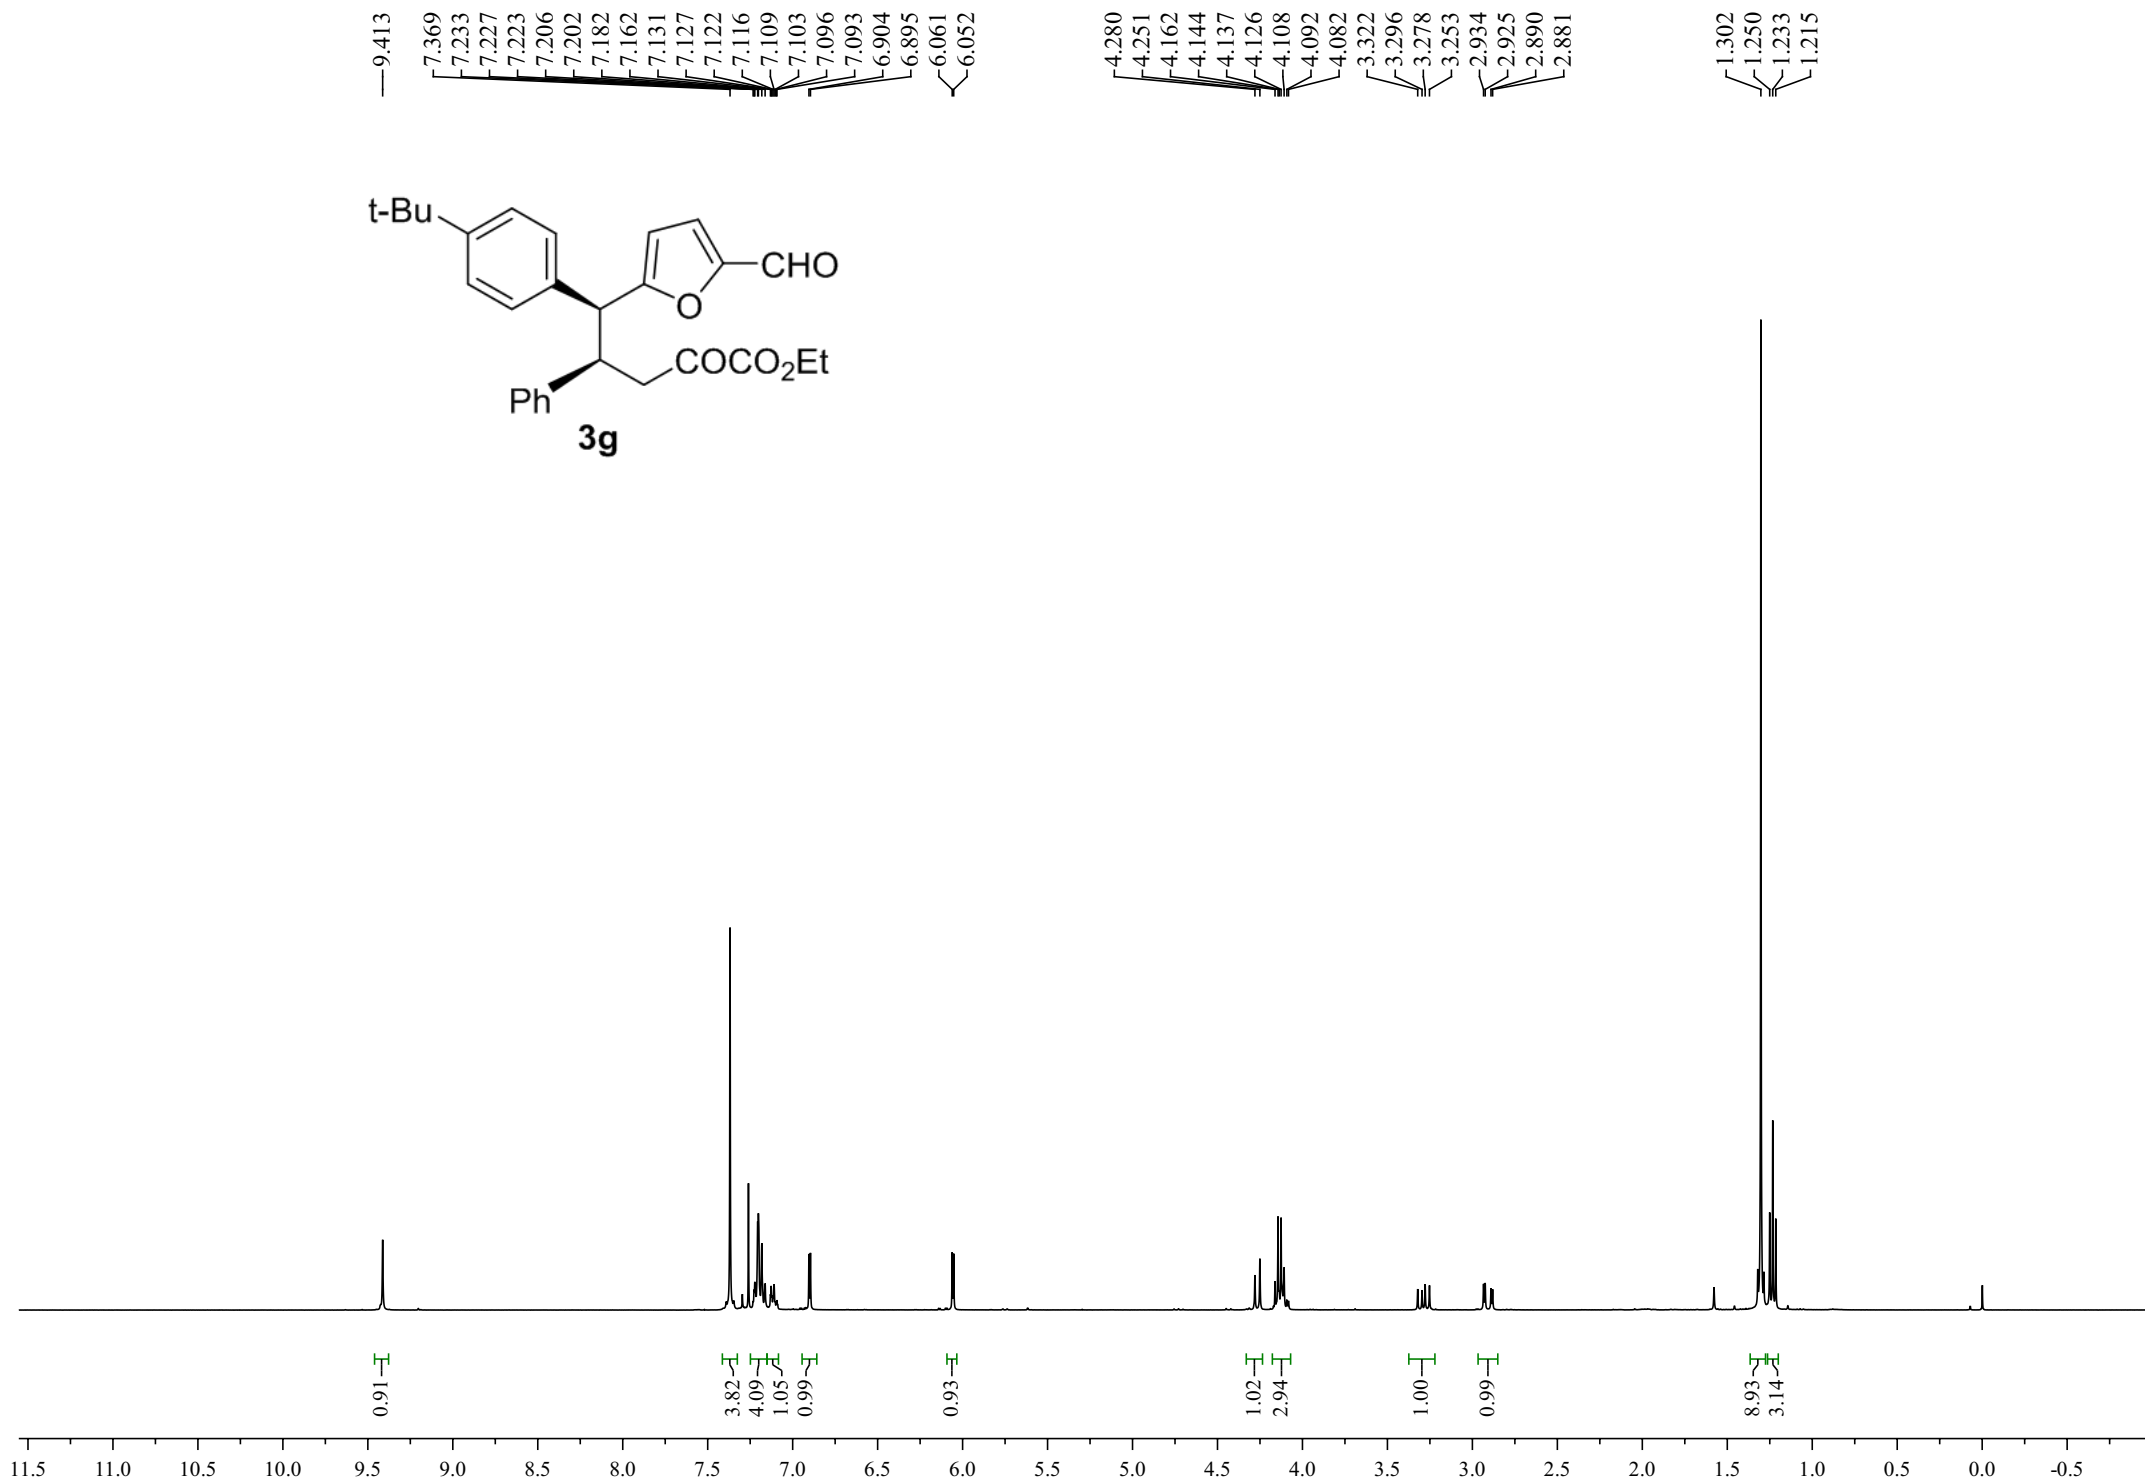



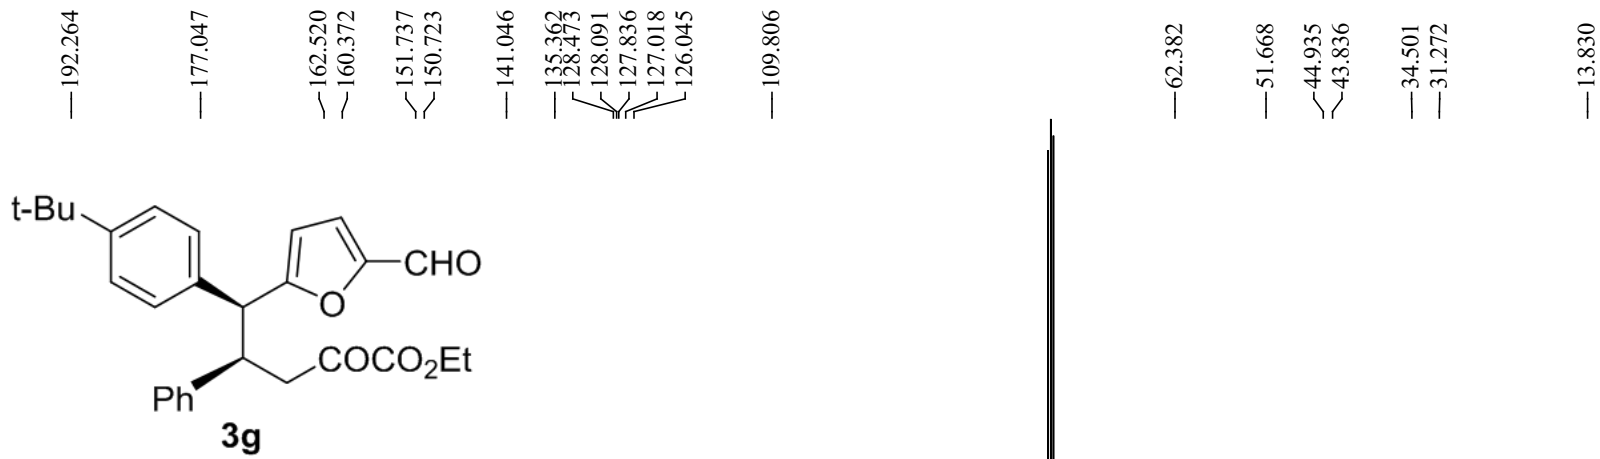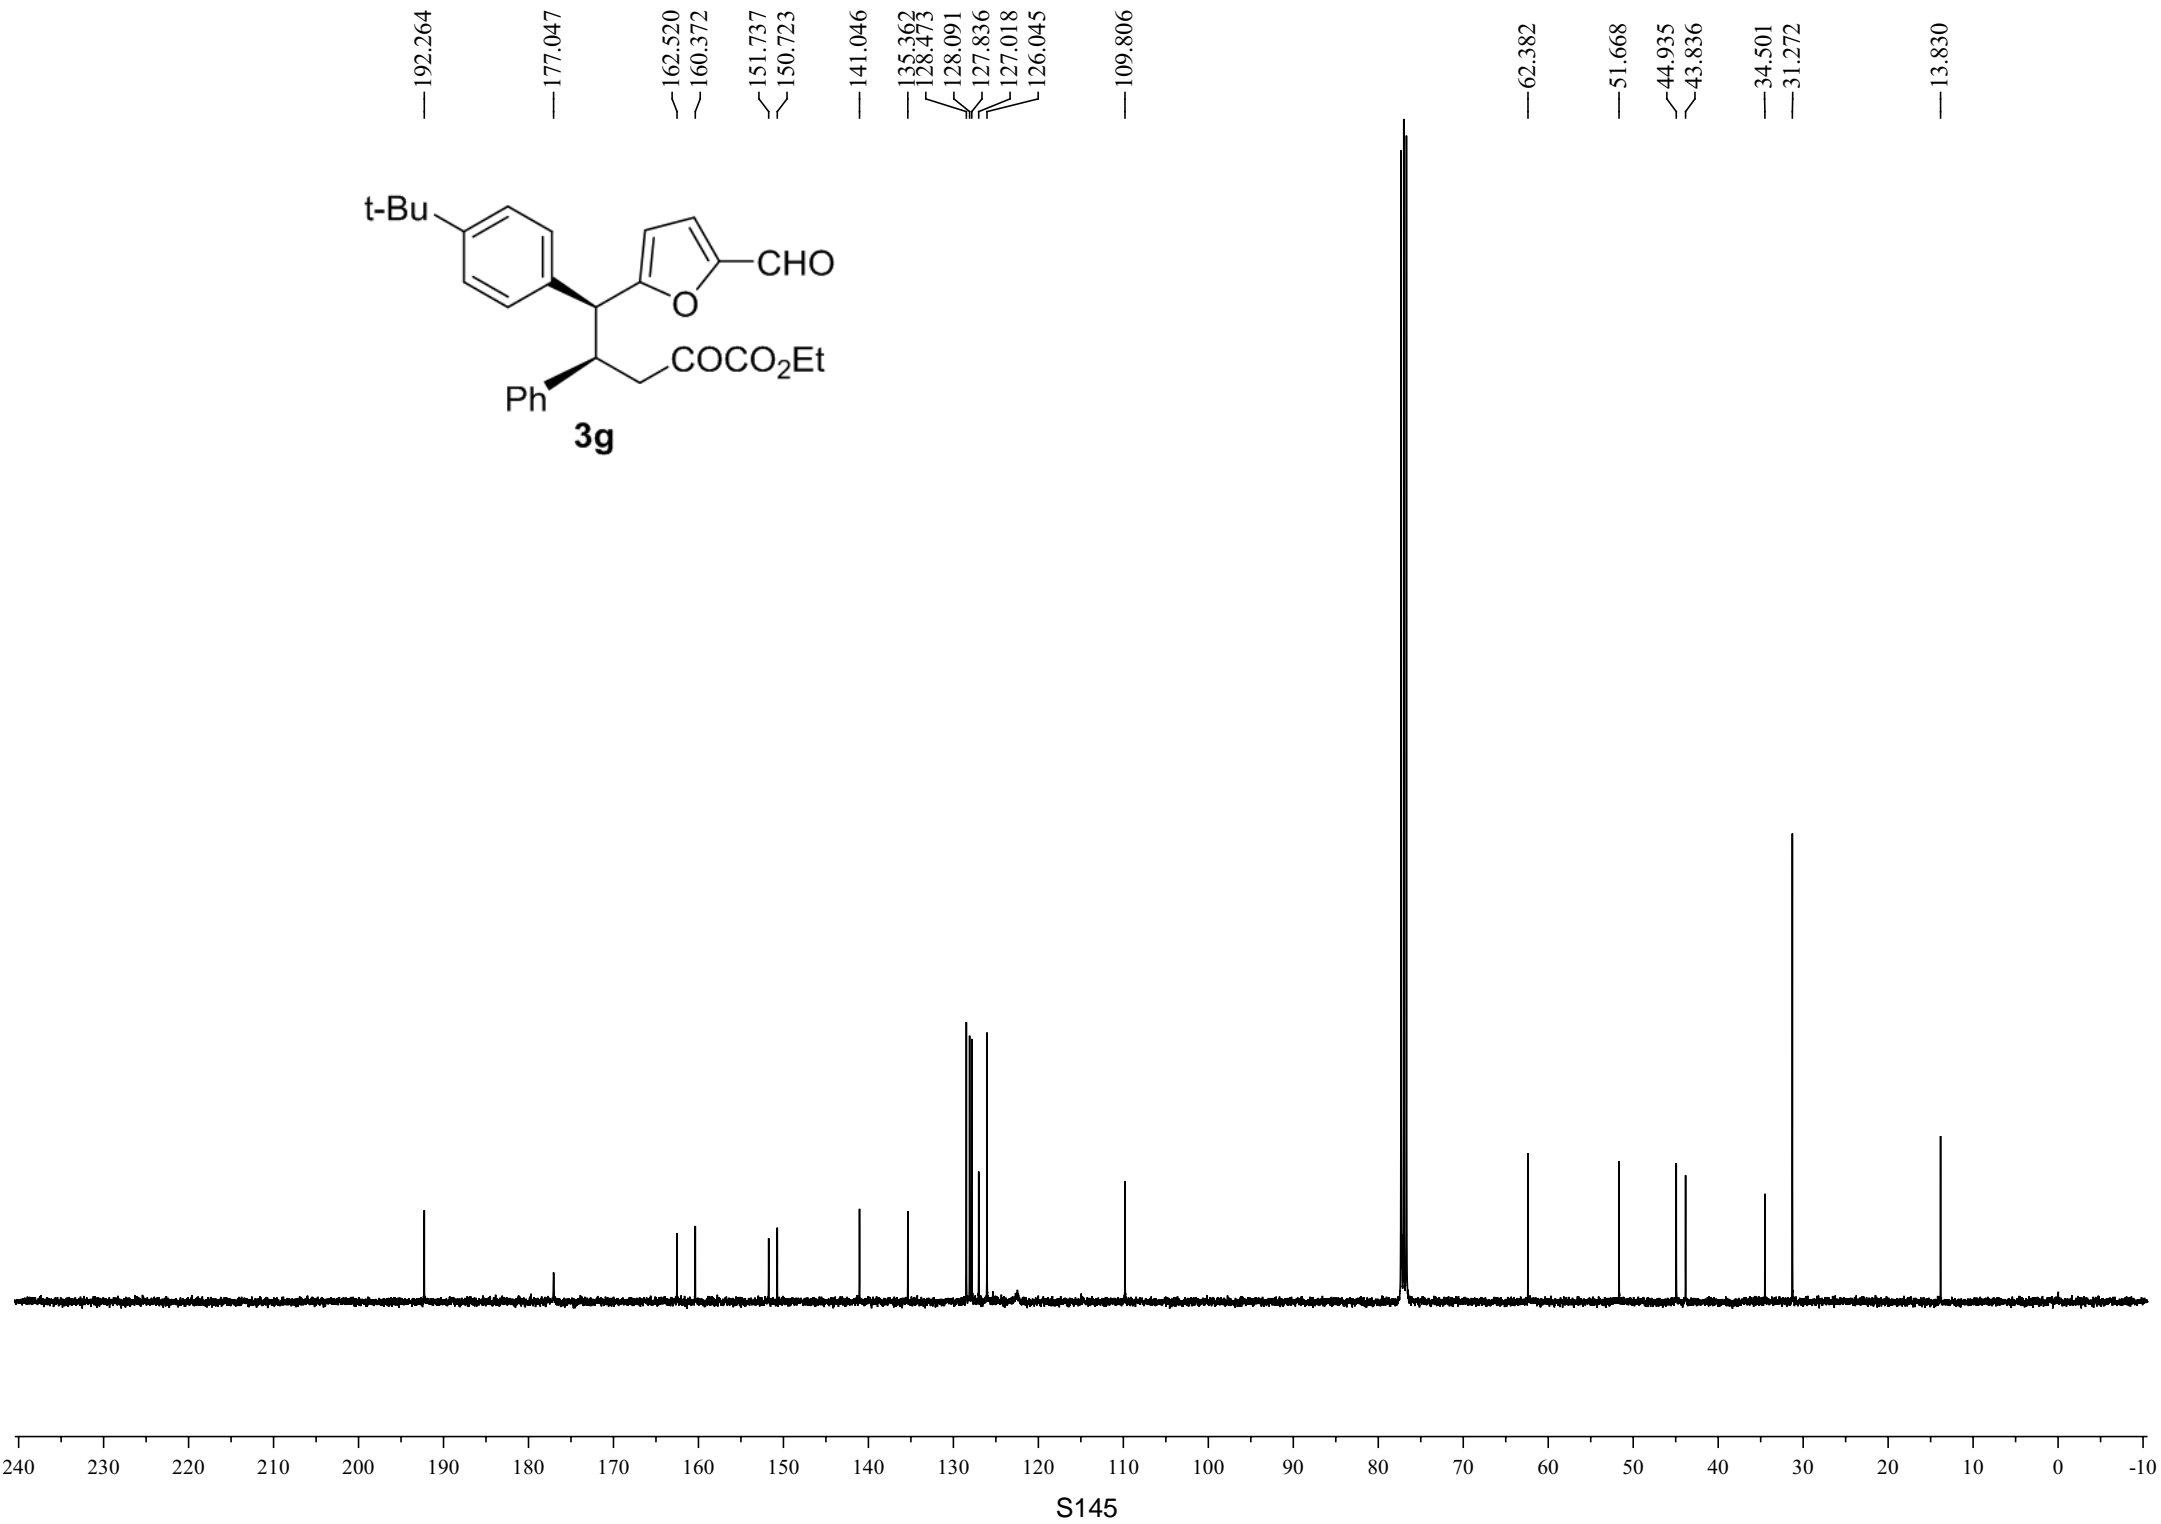

9.586

7.159  
7.151  
7.137  
7.115  
7.097  
7.080  
7.076  
7.062  
7.051  
7.030  
7.022  
7.018  
7.001  
6.388  
6.379

4.326  
4.300  
4.221  
4.205  
4.203  
4.197  
4.187  
4.185  
4.169  
4.125  
4.113  
4.102  
4.089  
4.077  
3.433  
3.411  
3.389  
3.367  
3.164  
3.152  
3.120  
3.108

1.292  
1.274  
1.257  
1.206

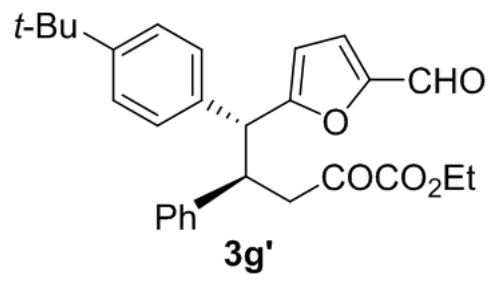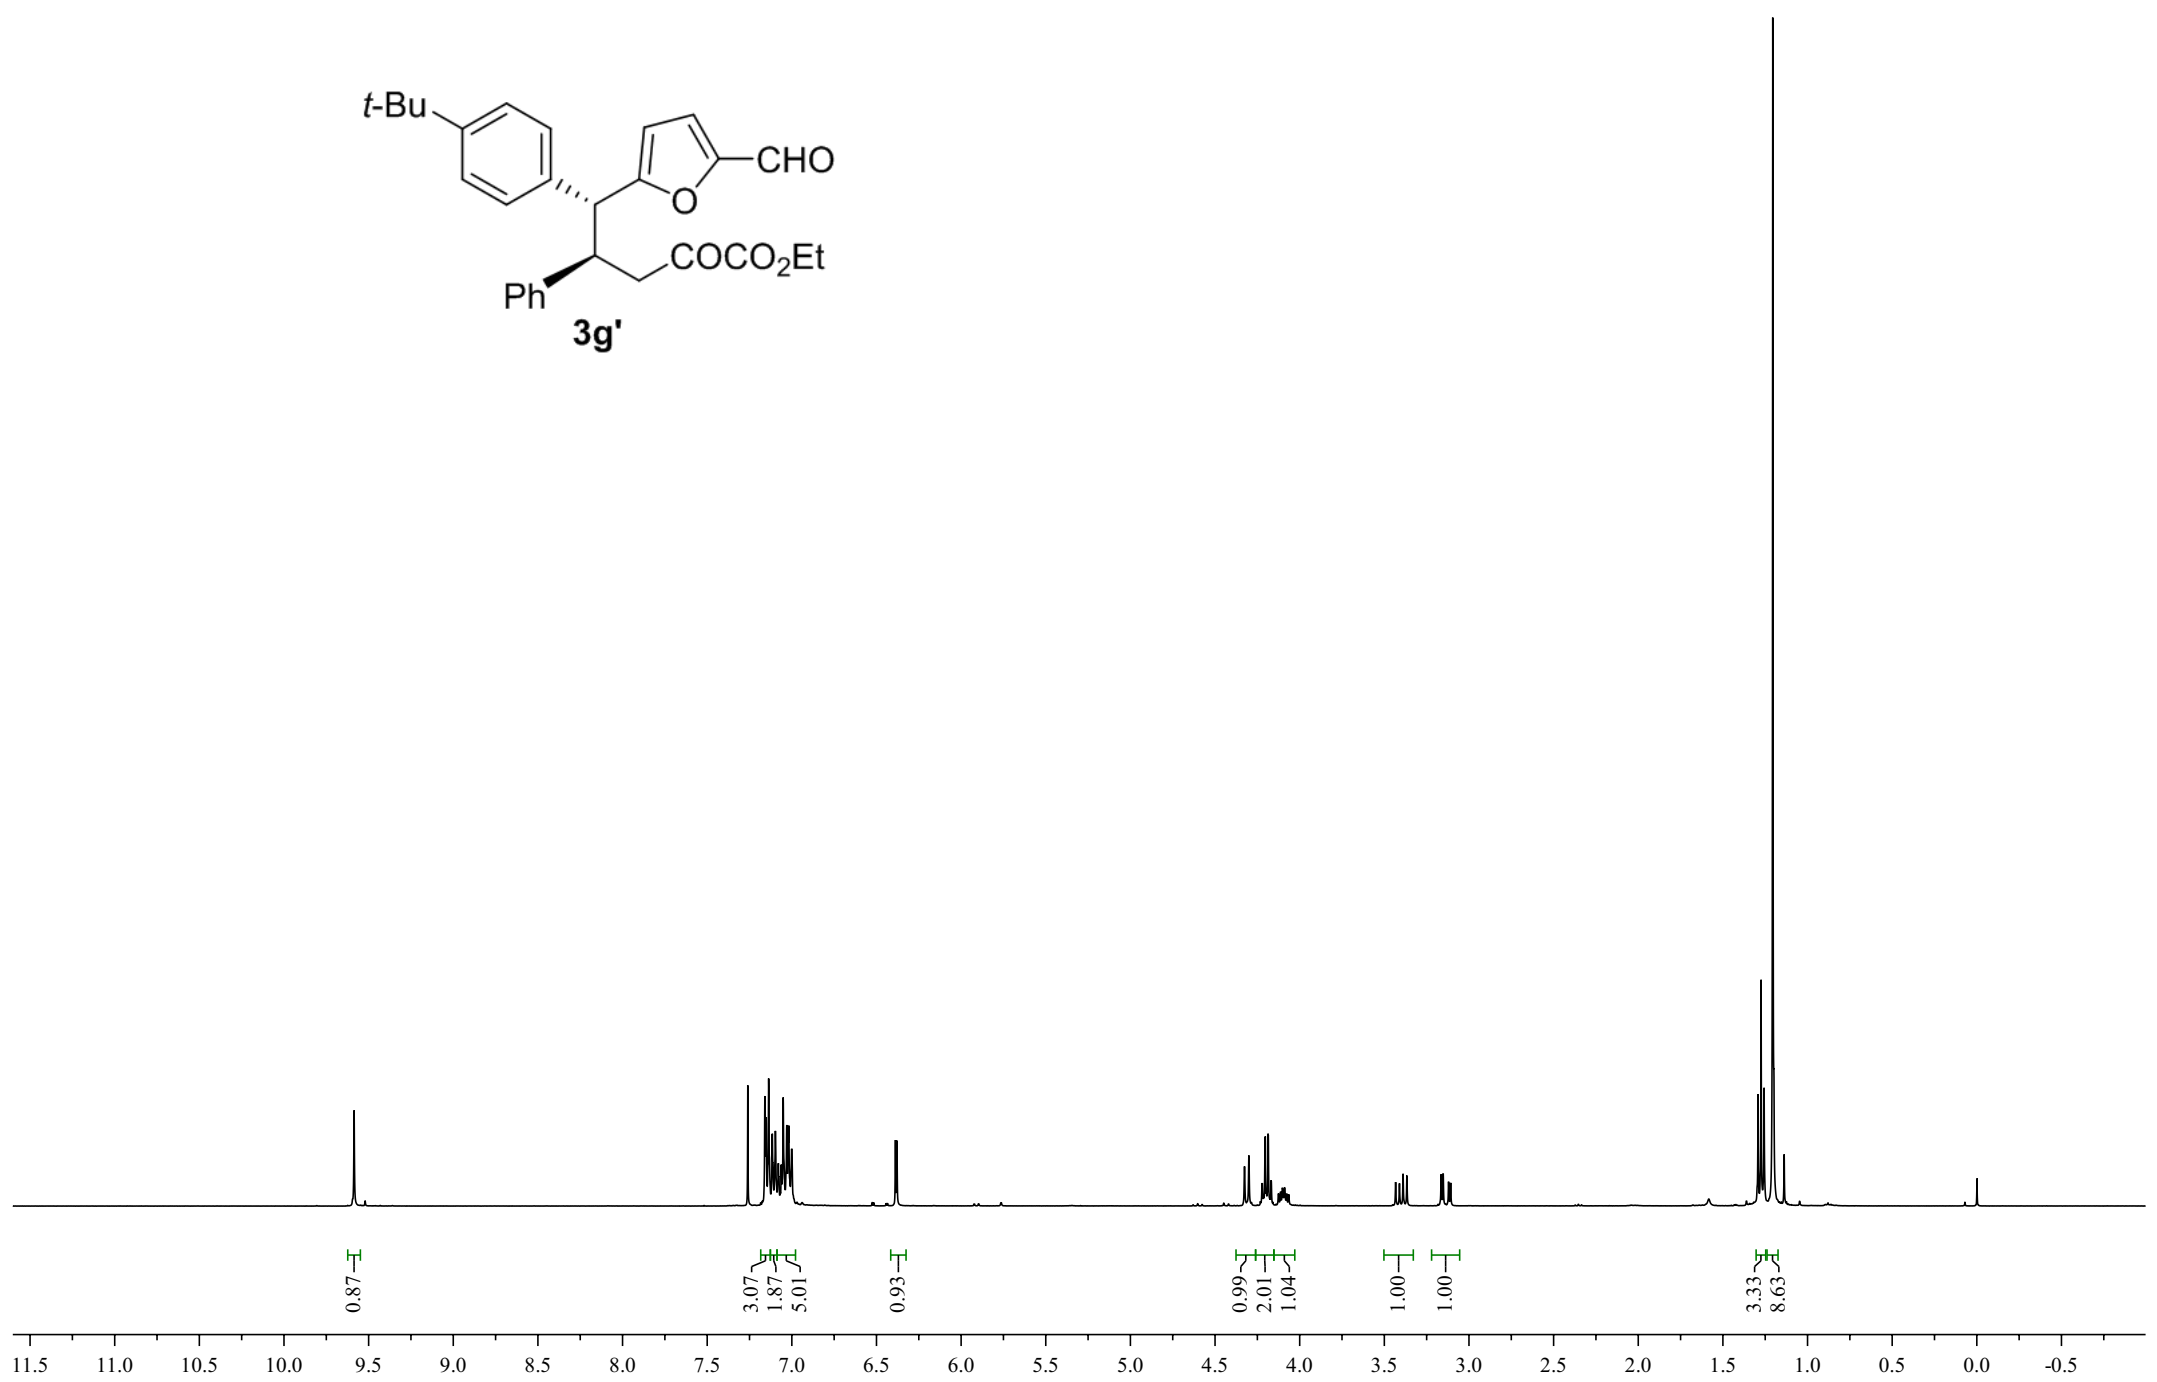

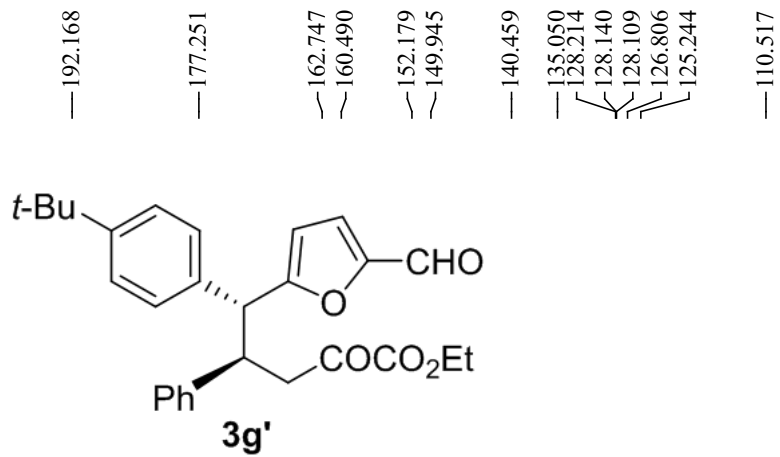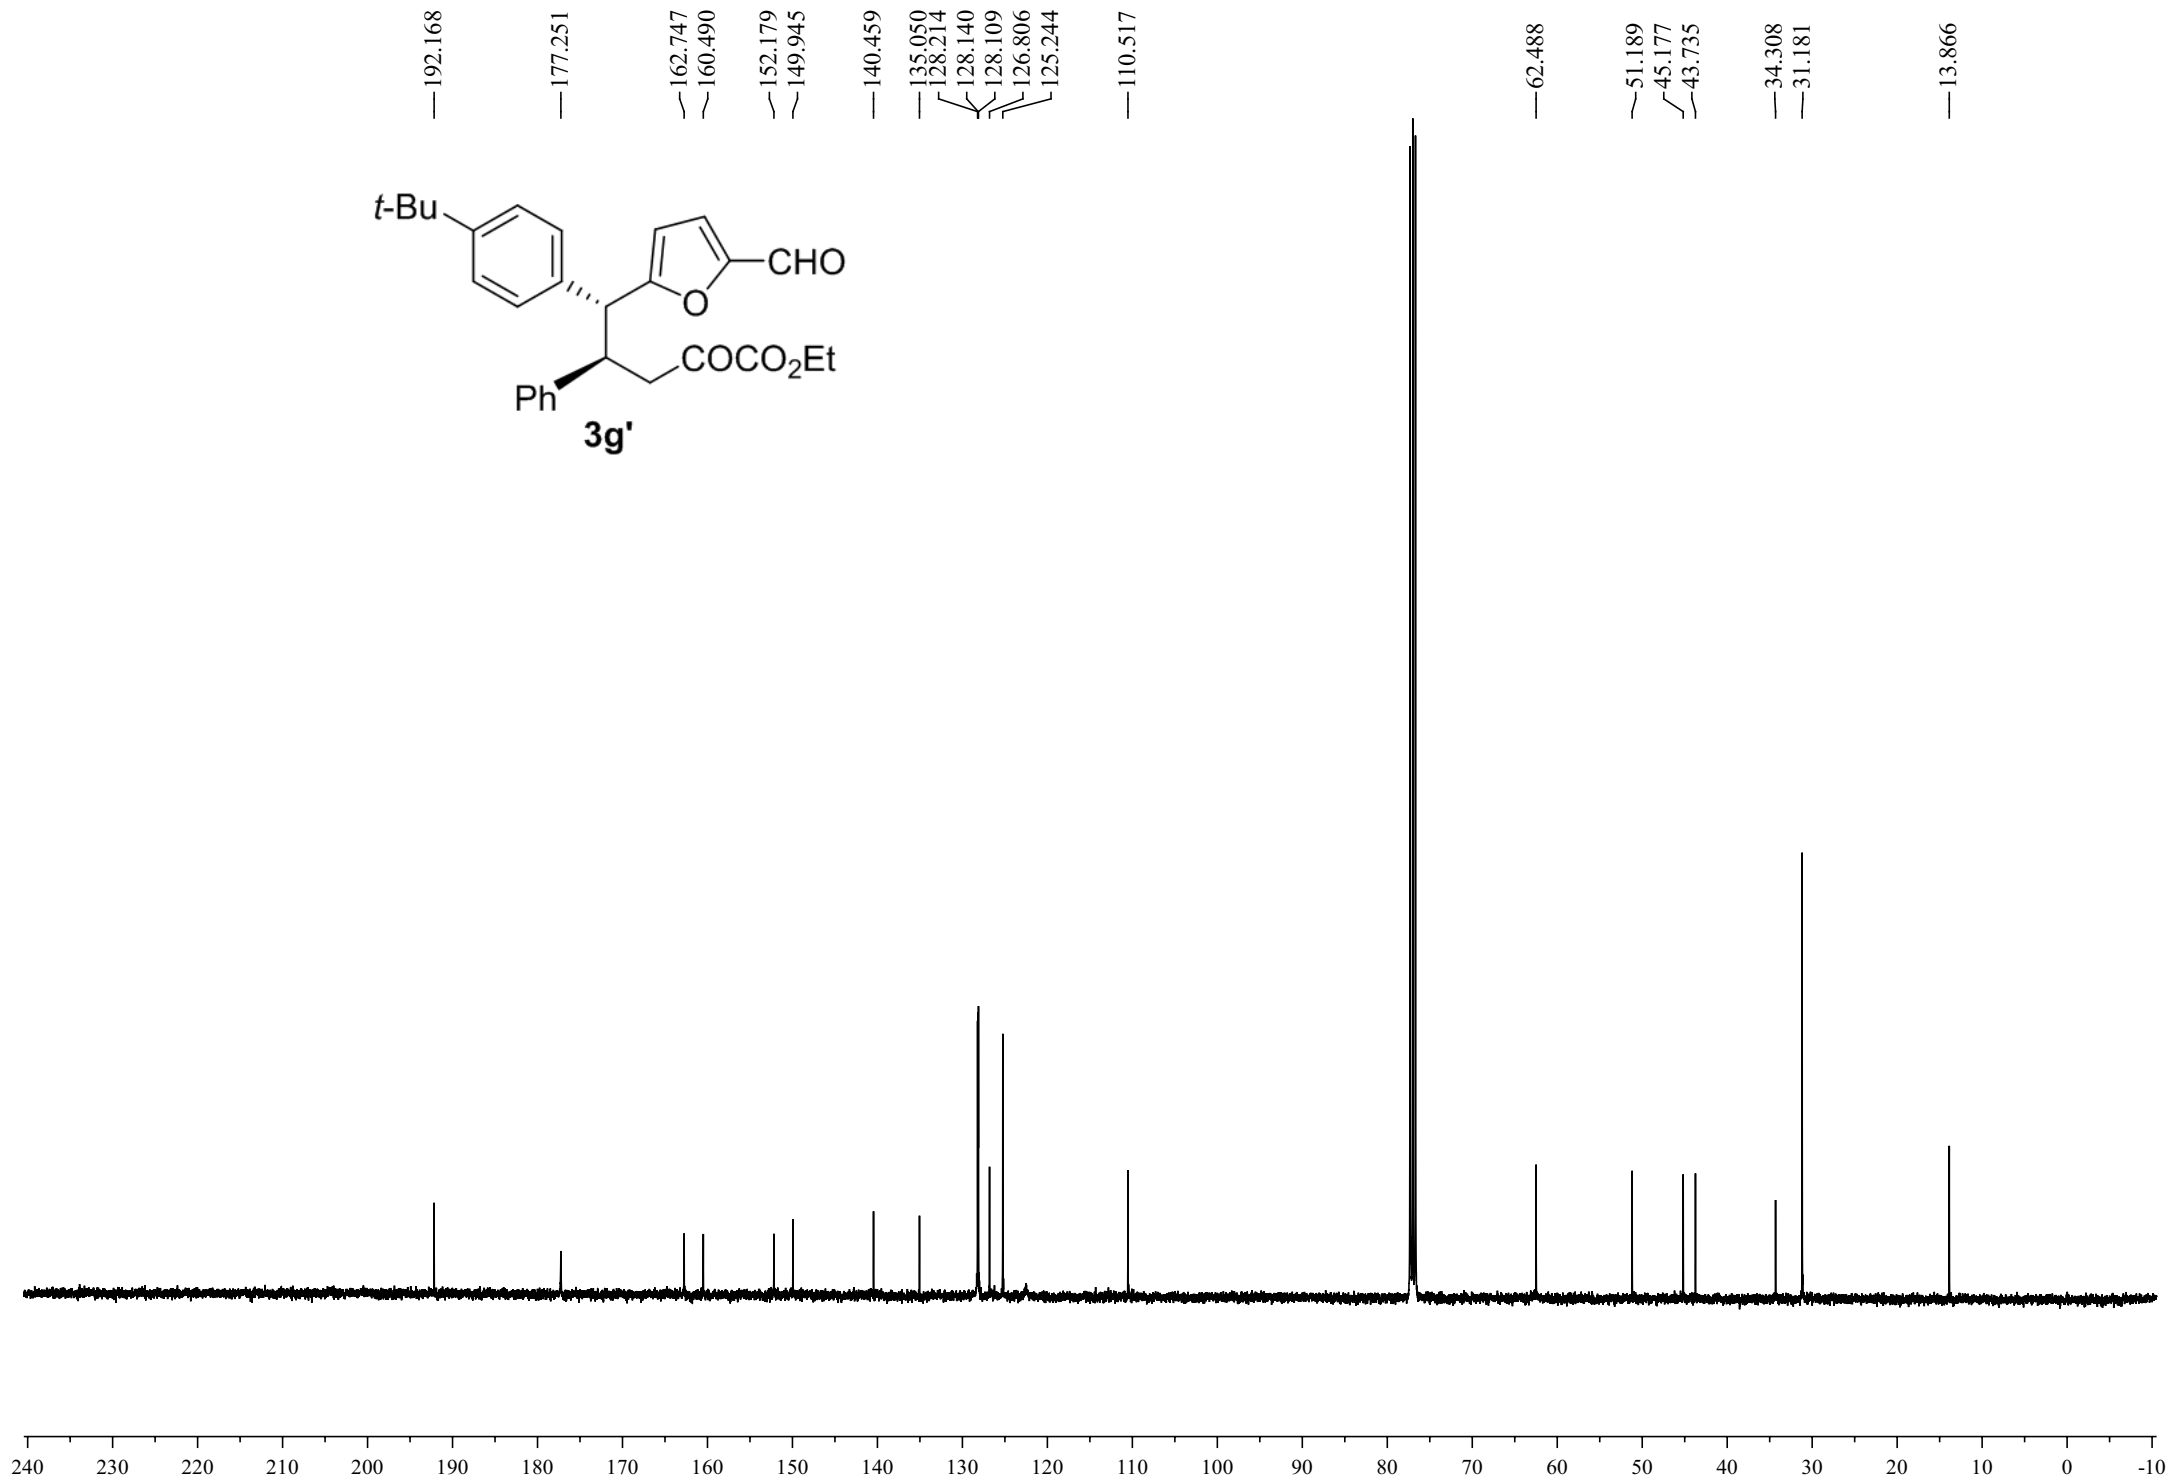

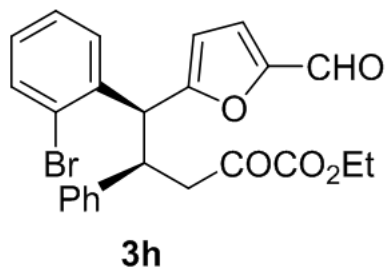

9.348  
 7.706  
 7.704  
 7.693  
 7.691  
 7.673  
 7.671  
 7.456  
 7.309  
 7.297  
 7.247  
 7.241  
 7.228  
 7.216  
 7.203  
 7.117  
 6.560  
 6.554

4.979  
 4.960

4.119  
 4.113  
 4.079  
 4.067  
 4.055  
 4.044

3.340  
 3.332  
 3.311  
 3.319  
 2.842  
 2.820  
 2.813

1.159  
 1.147  
 1.135

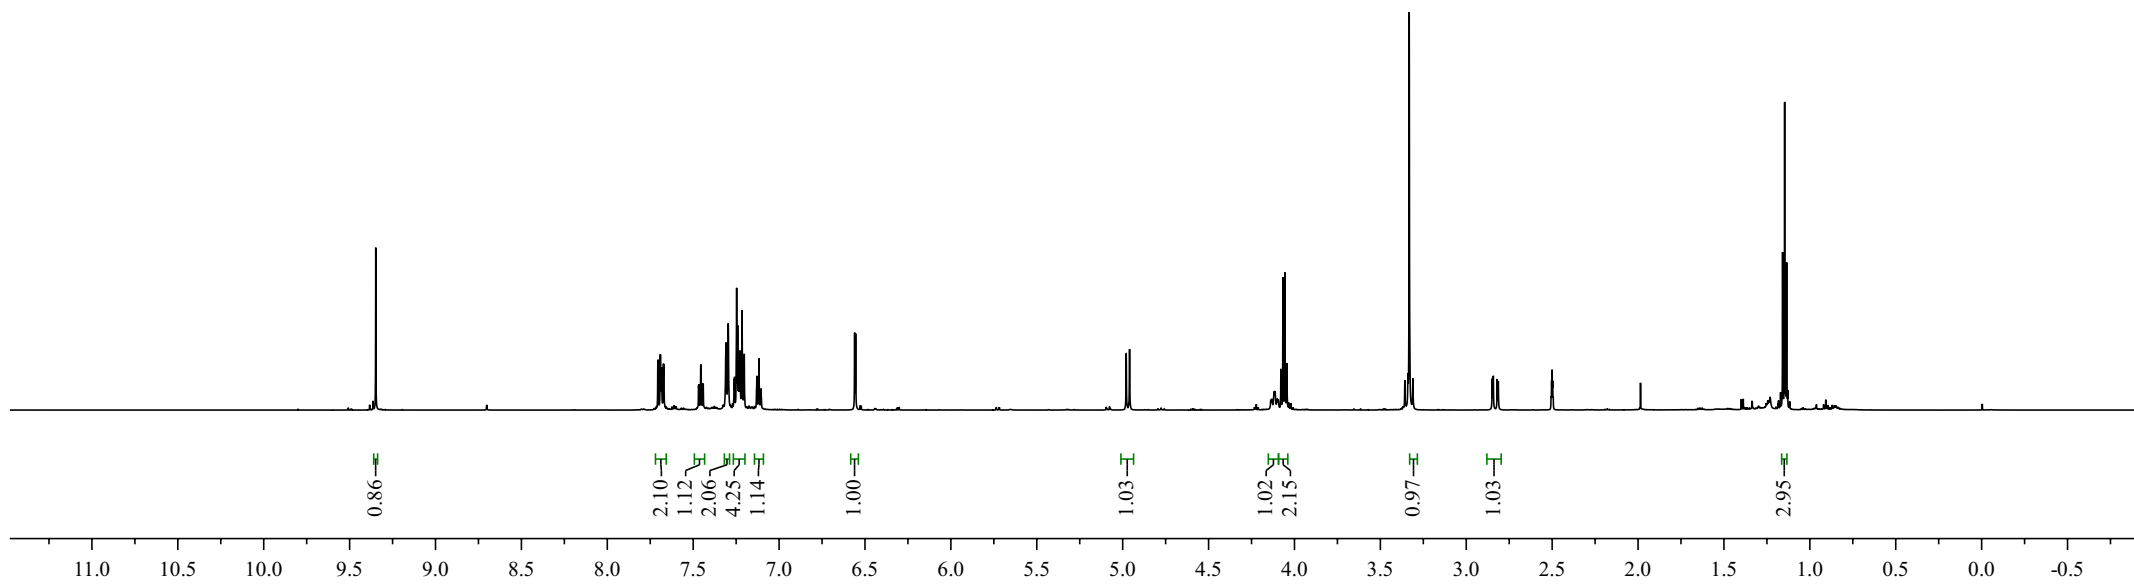



— 191.686  
— 177.565  
— 160.763  
— 159.761  
— 151.242  
— 141.162  
— 137.906  
— 133.092  
— 129.564  
— 128.742  
— 128.303  
— 127.925  
— 126.862  
— 124.713  
— 110.816

— 61.725

— 49.334  
— 44.080  
— 42.381

— 13.670

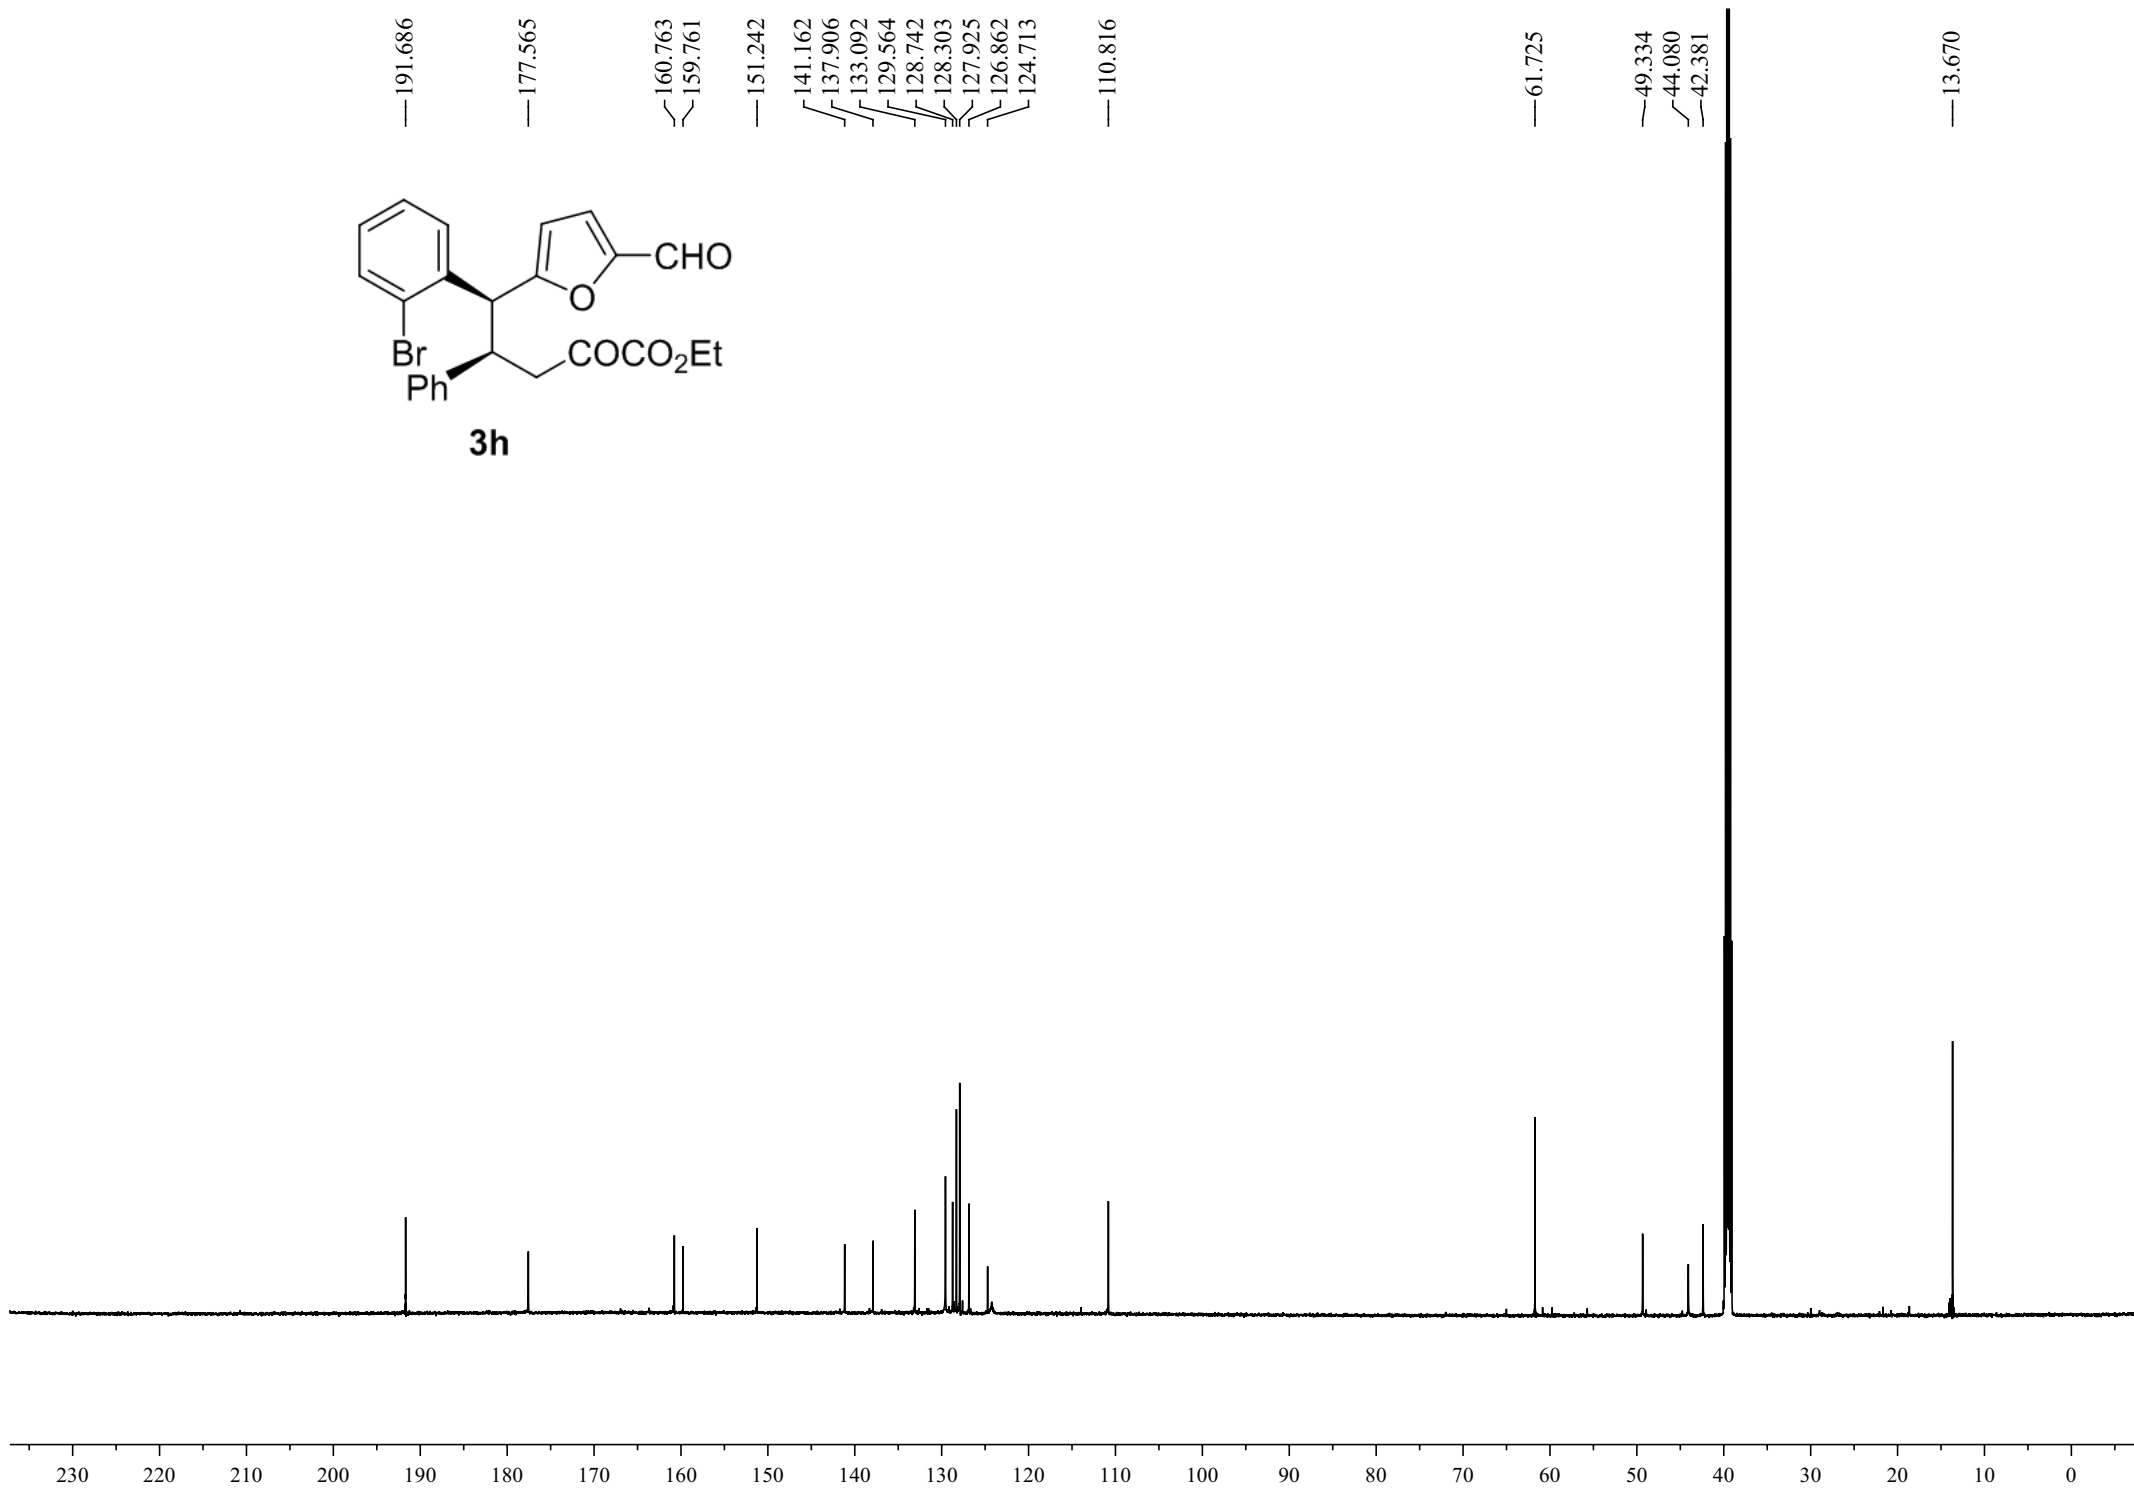

9.507  
 7.738  
 7.735  
 7.718  
 7.715  
 7.481  
 7.472  
 7.376  
 7.374  
 7.356  
 7.354  
 7.275  
 7.254  
 7.236  
 7.132  
 7.114  
 7.095  
 7.039  
 7.021  
 7.015  
 7.011  
 6.995  
 6.992  
 6.785  
 6.778  
 5.098  
 5.069  
 4.166  
 4.160  
 4.156  
 4.135  
 4.117  
 4.099  
 4.082  
 3.436  
 3.433  
 3.412  
 3.389  
 3.177  
 3.166  
 3.133  
 3.122  
 1.200  
 1.182  
 1.164

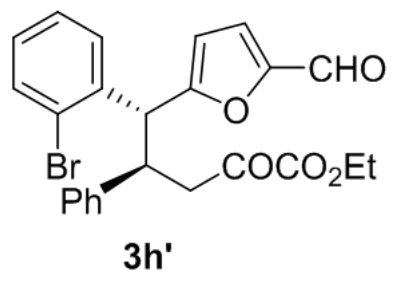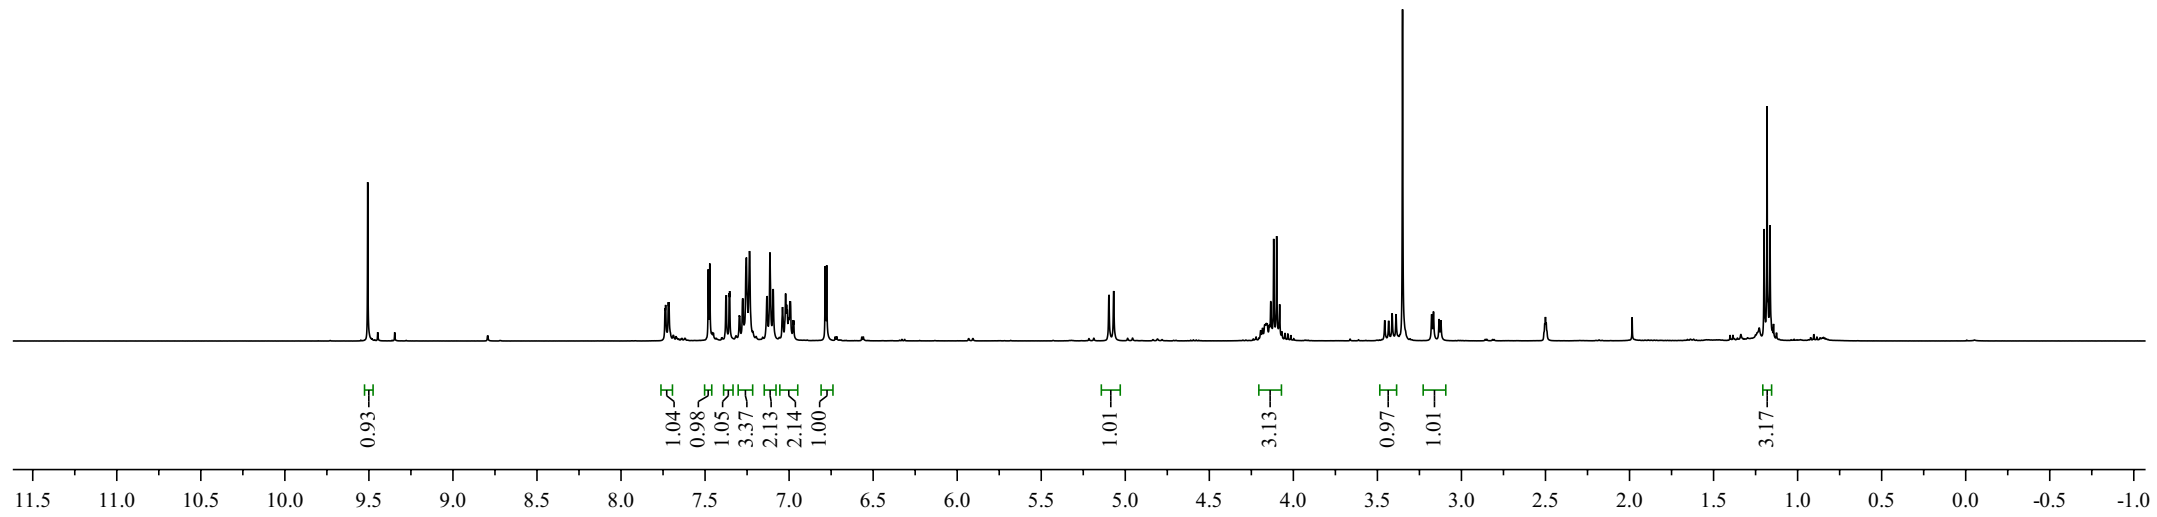

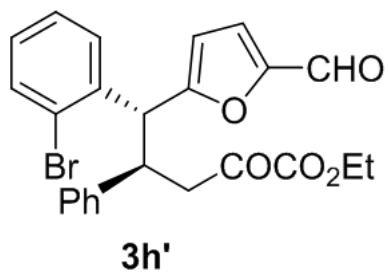

— 191.617  
— 177.776  
— 160.634  
— 159.906  
— 151.990  
— 140.671  
— 137.796  
— 132.529  
— 130.210  
— 128.805  
— 128.170  
— 127.953  
— 127.873  
— 126.611  
— 124.138  
— 111.240

— 61.763

— 48.325  
— 43.705  
— 43.504

— 13.717

240 230 220 210 200 190 180 170 160 150 140 130 120 110 100 90 80 70 60 50 40 30 20 10 0 -10

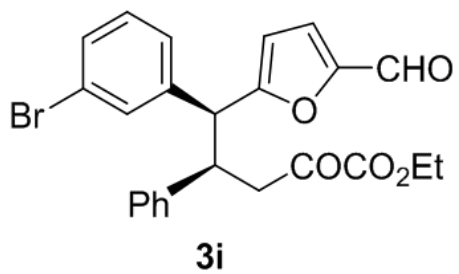

9.334  
7.776  
7.565  
7.545  
7.494  
7.474  
7.472  
7.369  
7.349  
7.237  
7.228  
7.203  
7.185  
7.166  
7.099  
6.981  
6.558

4.686  
4.656  
4.071  
4.053  
4.035  
4.031  
4.013  
3.325  
3.281  
3.259  
2.849  
2.815  
2.805

1.165  
1.147  
1.129

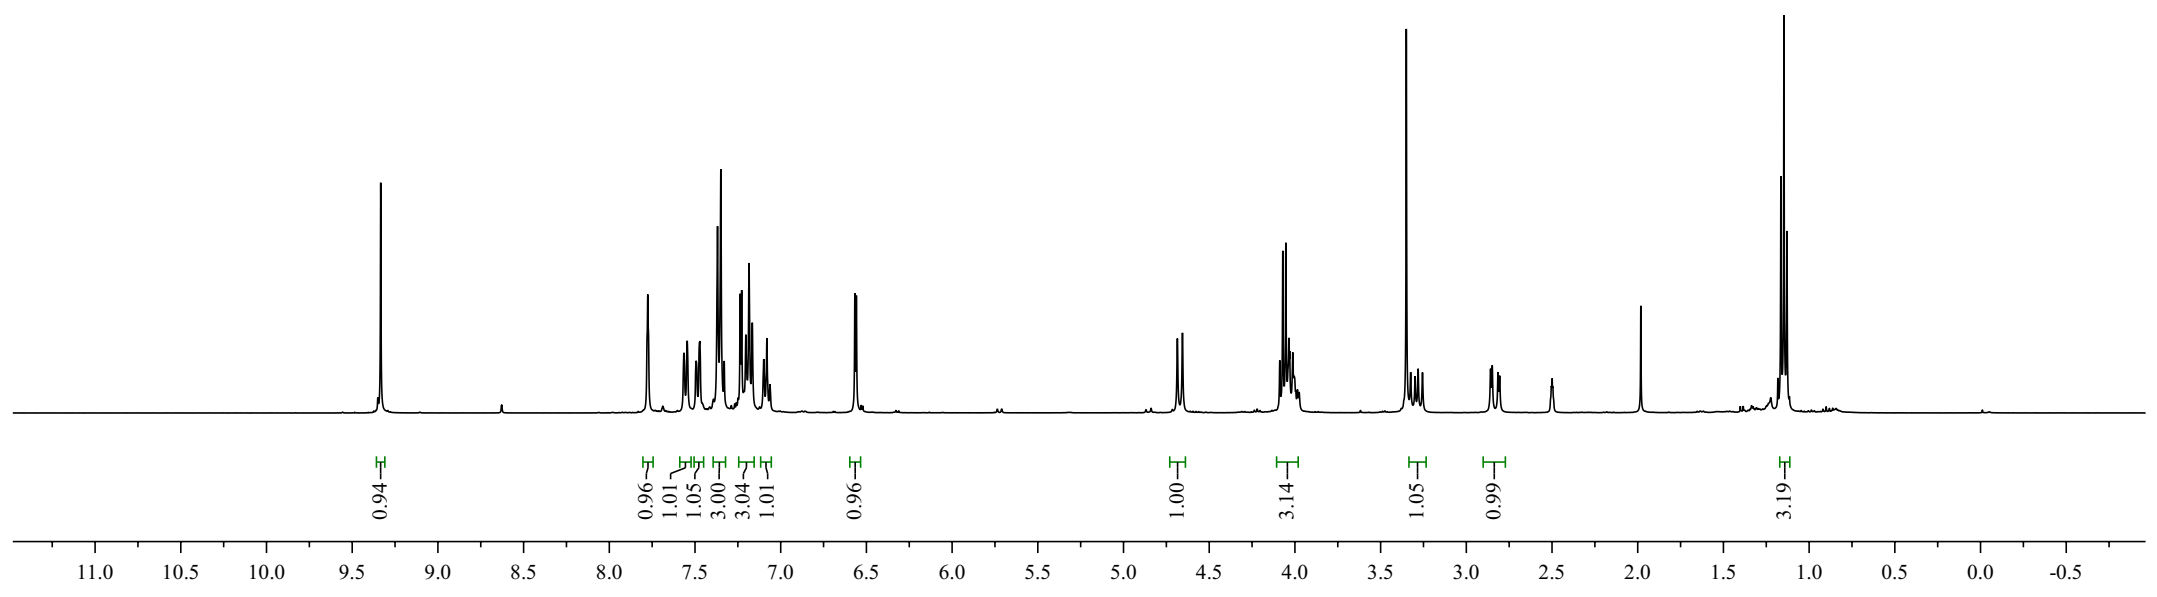



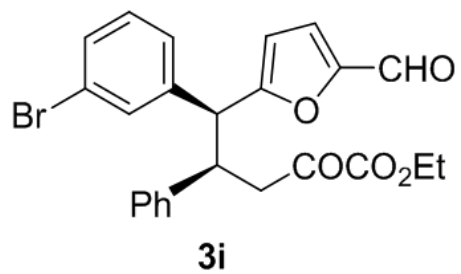

—191.936  
—177.467  
—161.978  
—159.838  
—151.101  
—142.342  
—141.617  
—131.269  
—131.077  
—130.356  
—128.089  
—127.521  
—126.647  
—122.076  
—110.331

—61.694

—49.760

—44.072

—43.332

—13.686

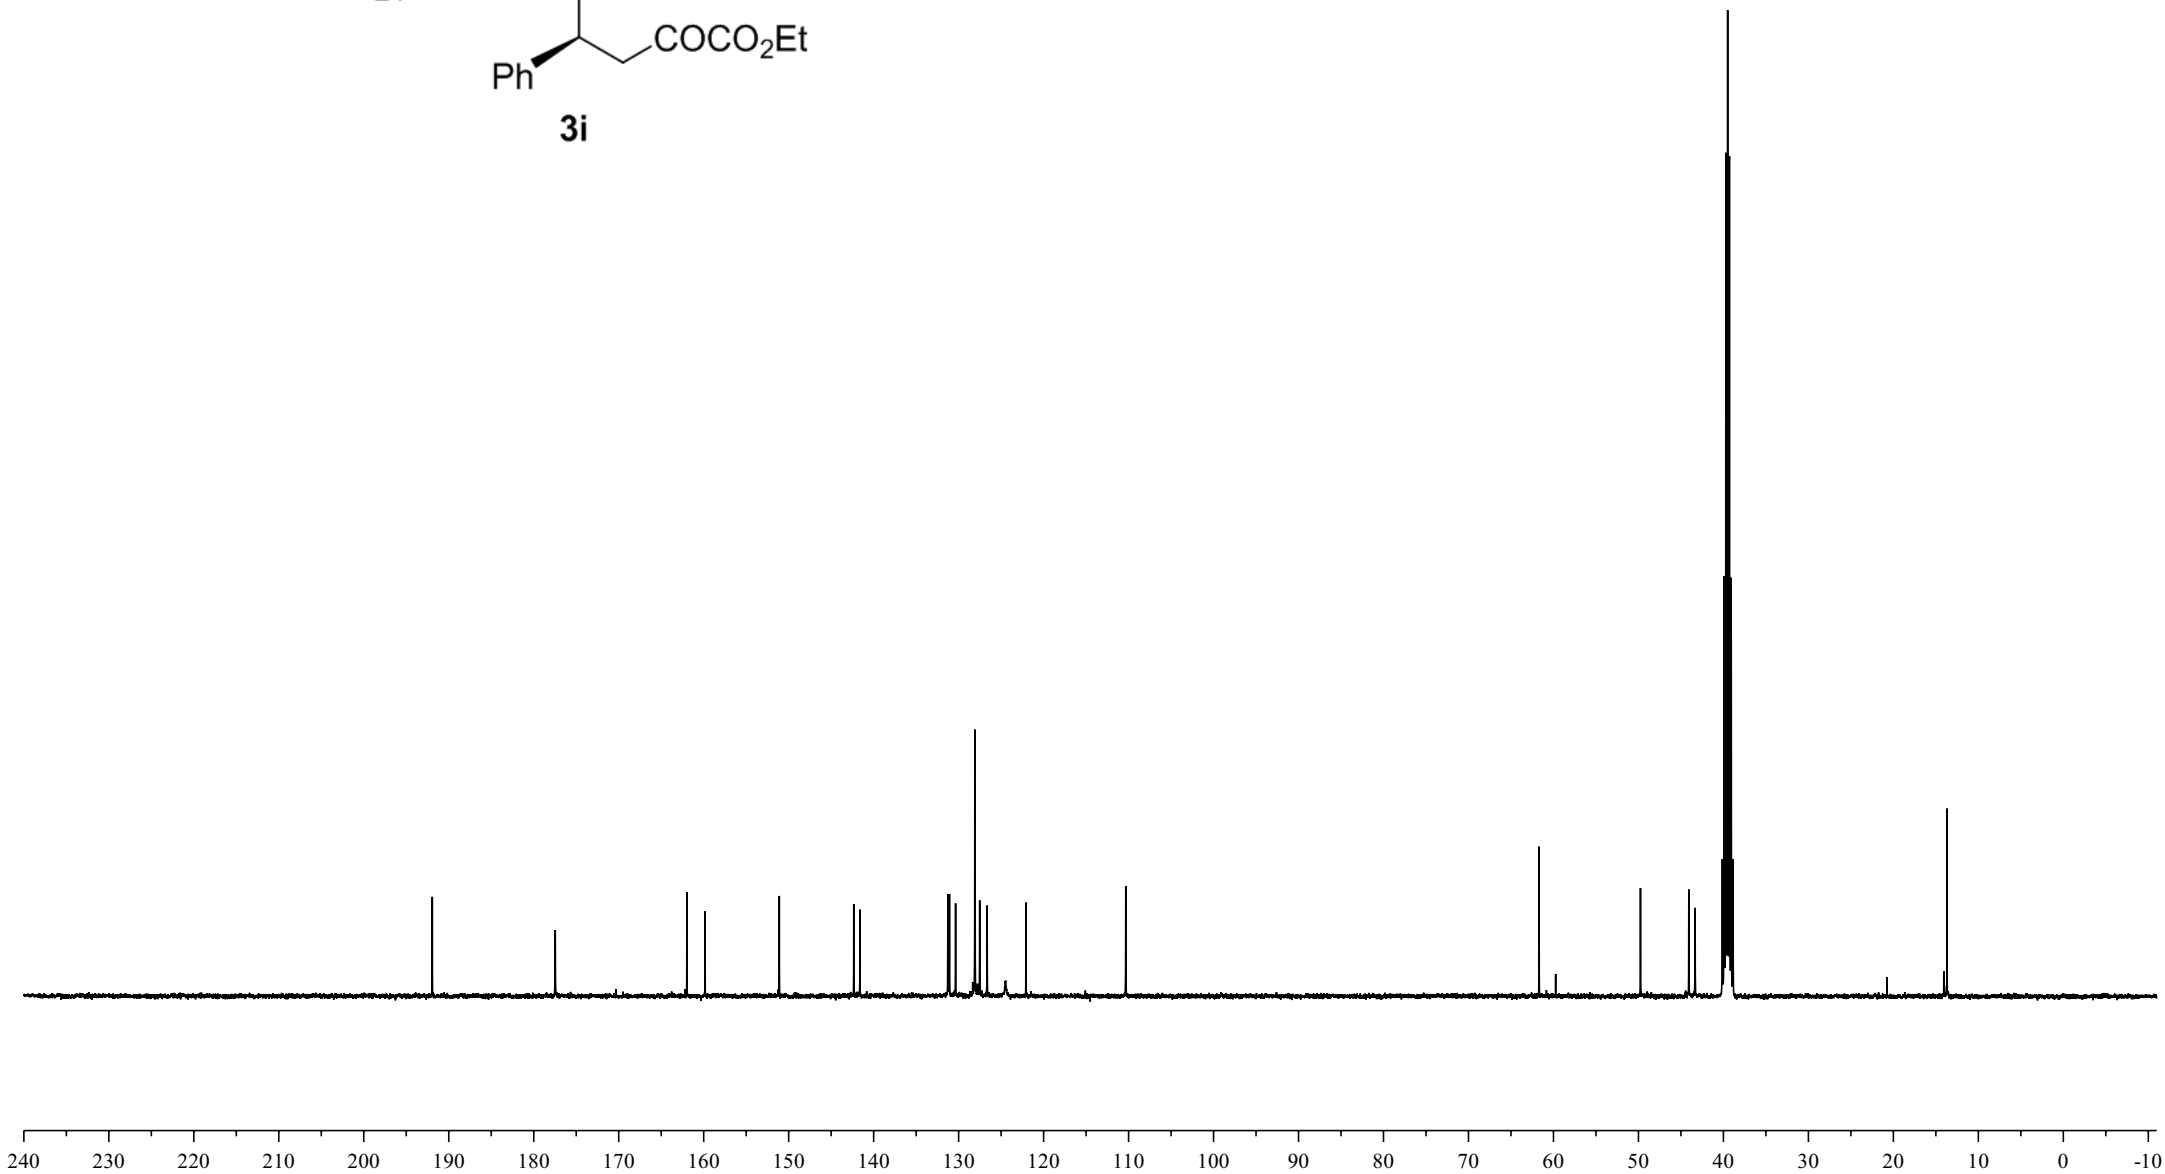

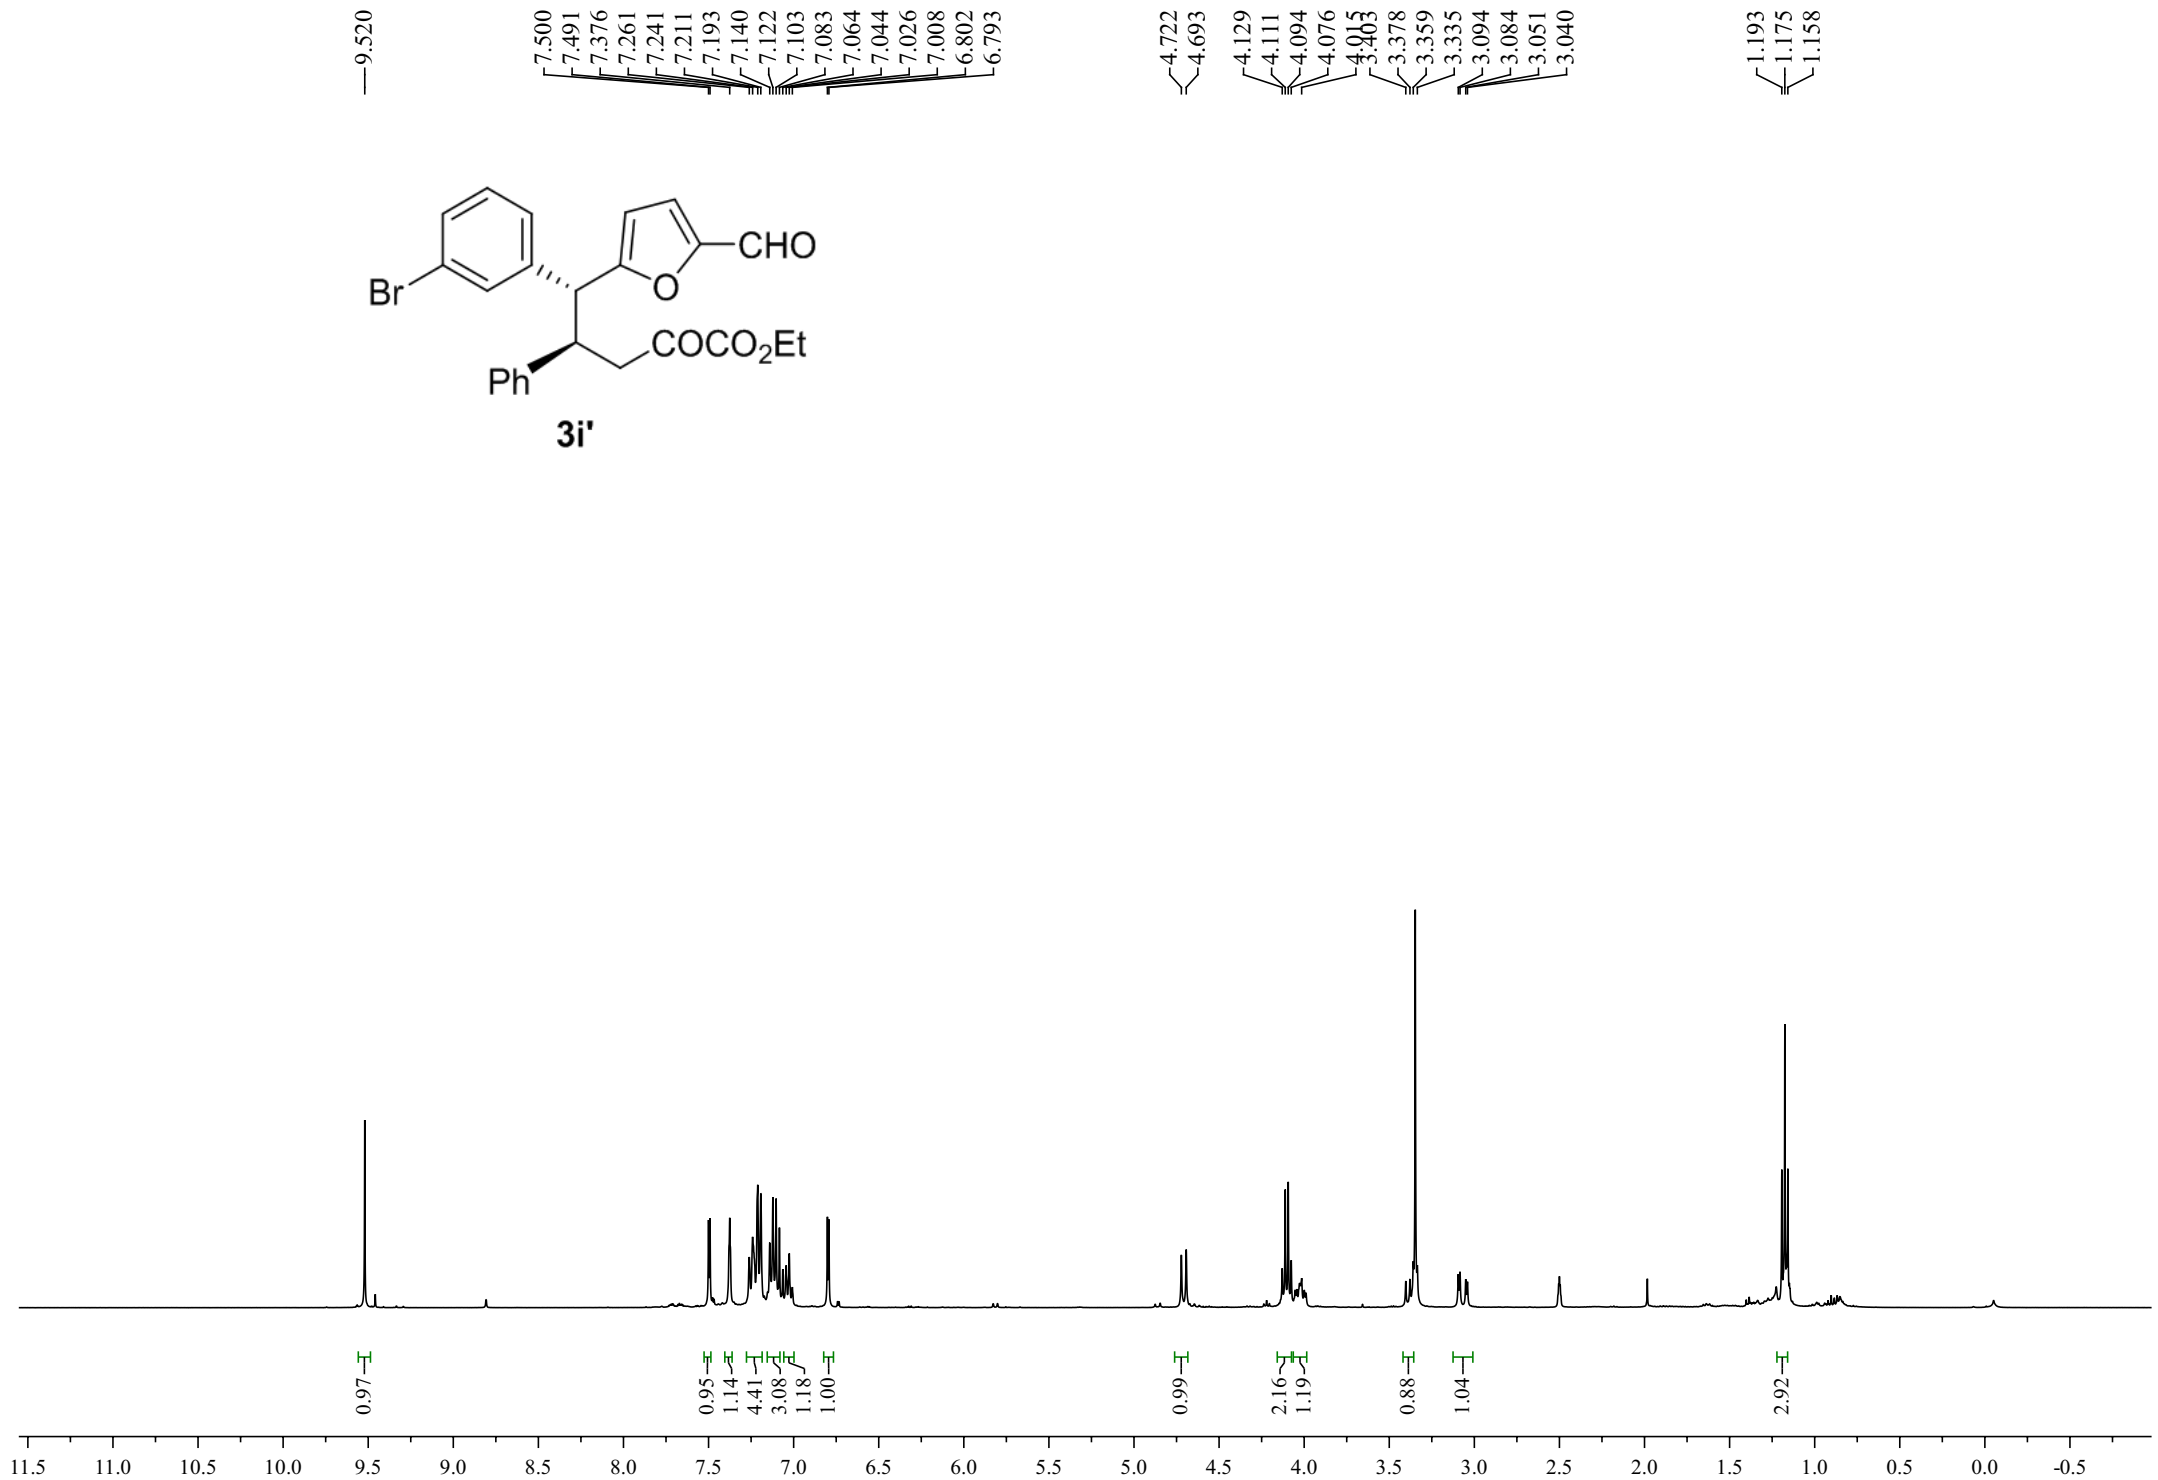

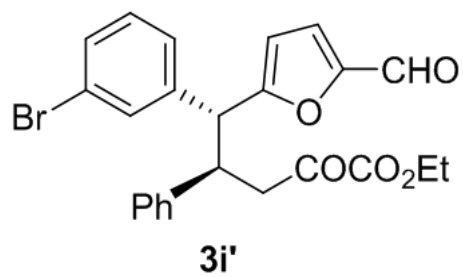

— 191.669 — 177.779 — 161.805 — 159.921 — 151.927 — 141.932 — 140.808 — 131.228 — 130.317 — 129.556 — 128.325 — 127.995 — 127.469 — 121.288 — 110.708 — 61.747 — 49.330 — 44.027 — 43.904 — 13.700

240 230 220 210 200 190 180 170 160 150 140 130 120 110 100 90 80 70 60 50 40 30 20 10 0 -10

S155

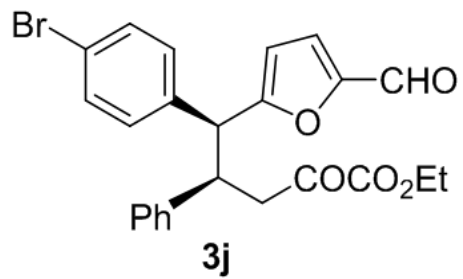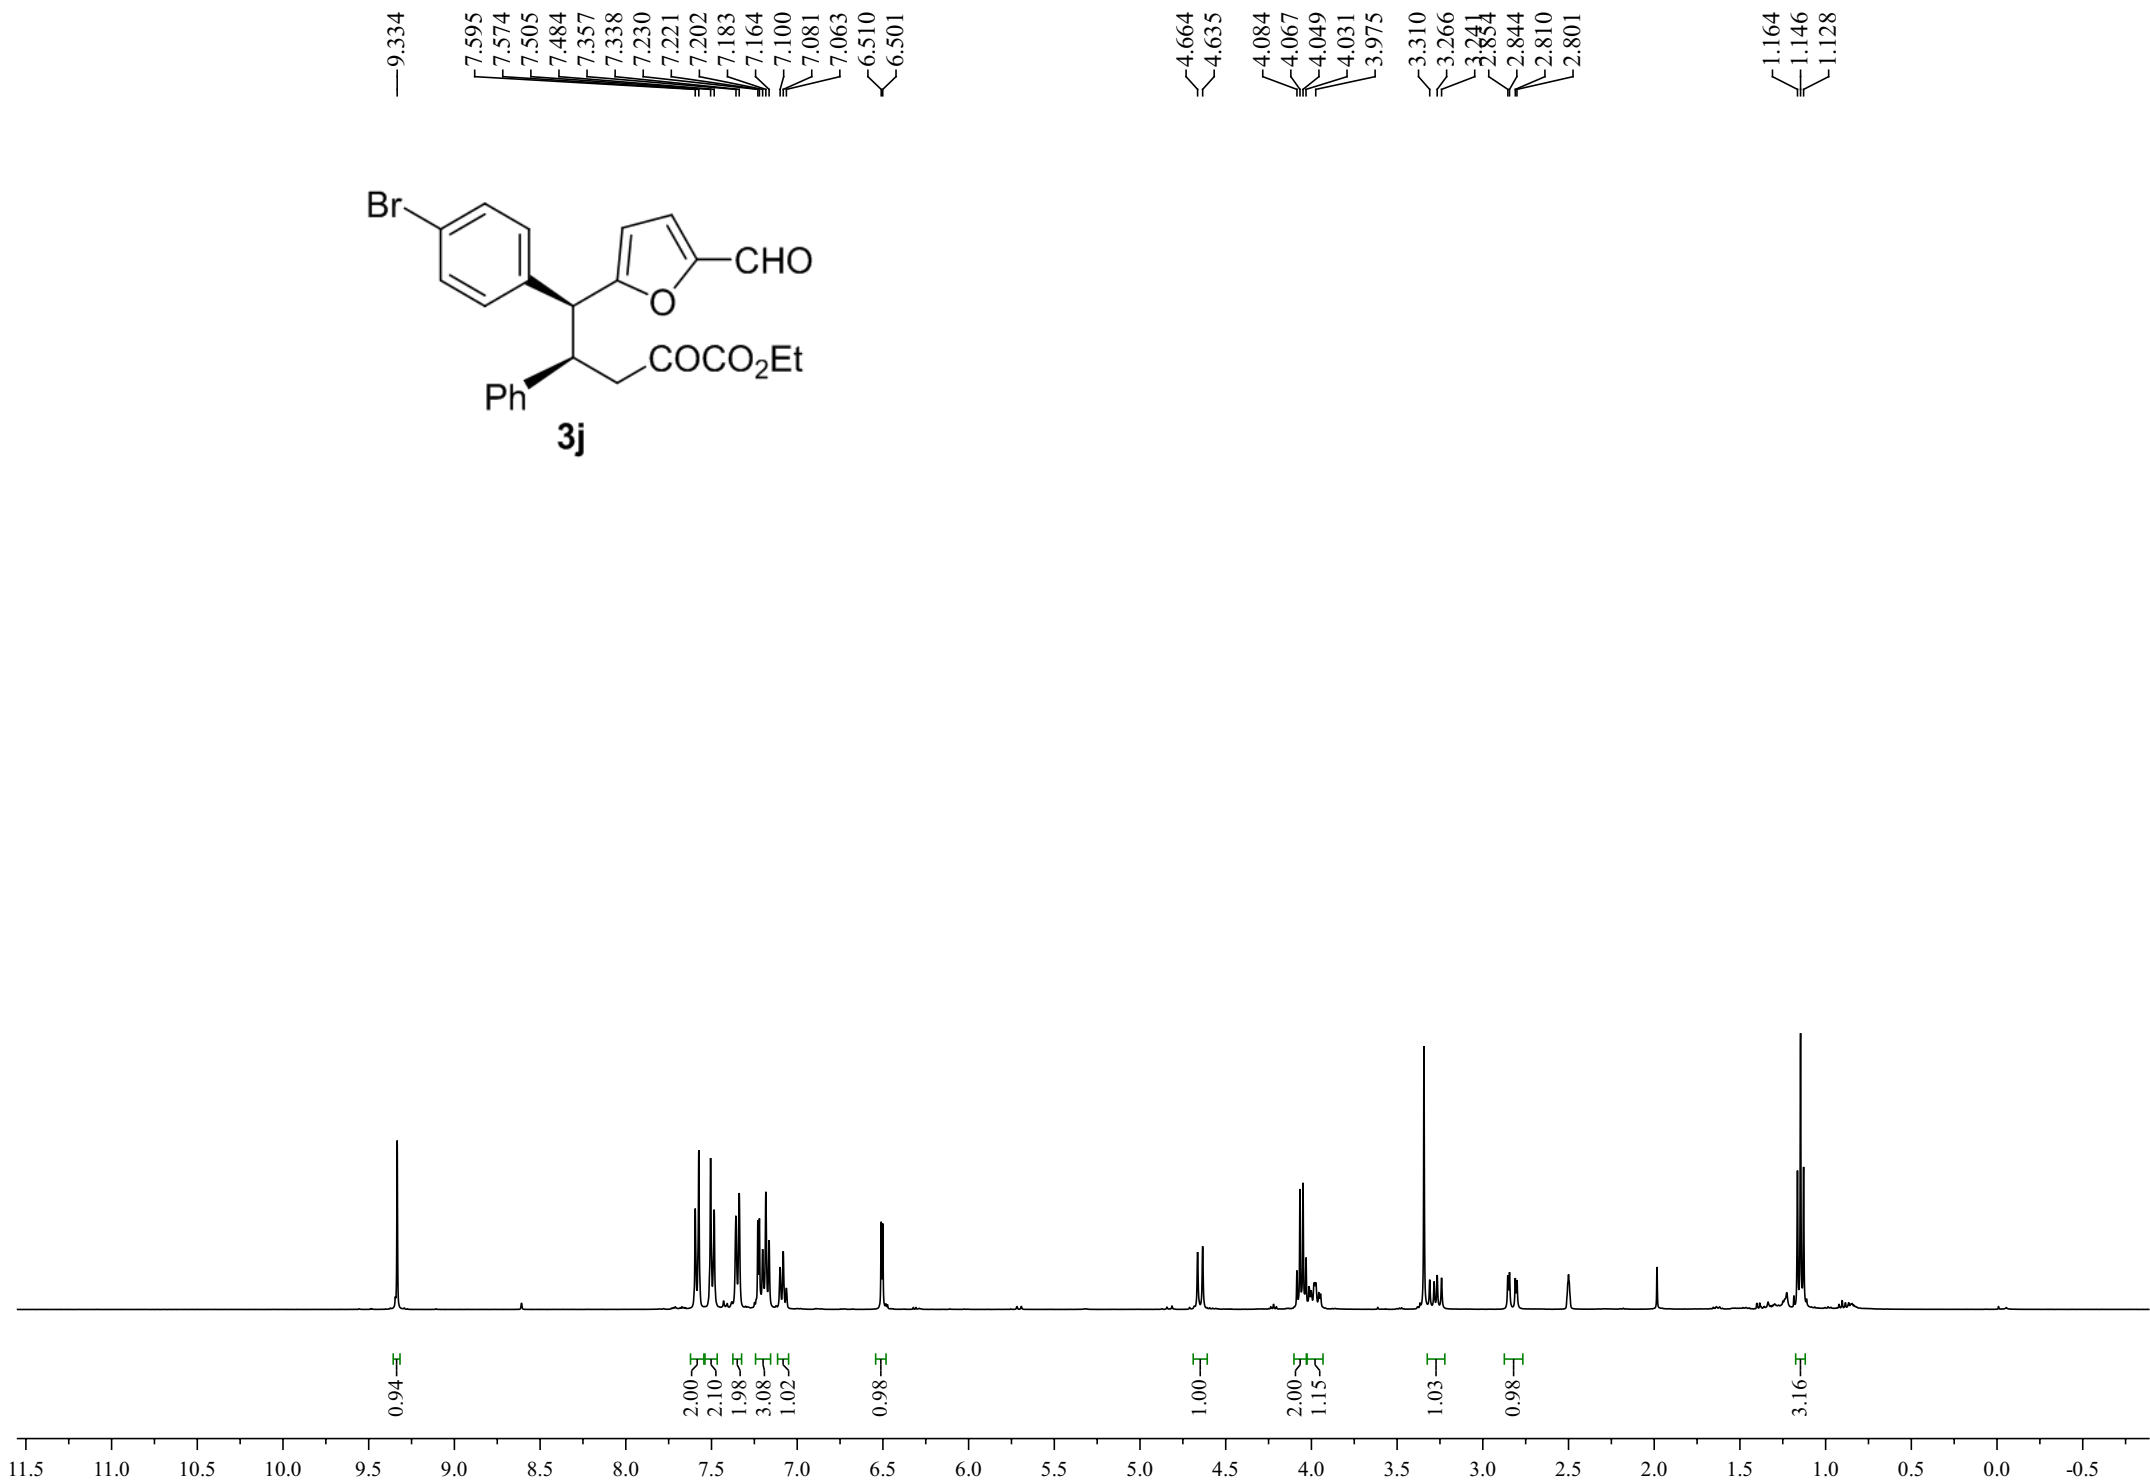

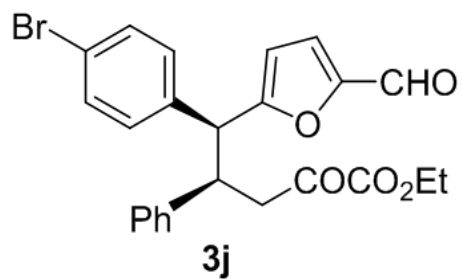

—191.976

—177.423

—162.110

—159.876

—151.112

—141.653

—138.992

—131.786

—130.738

—128.083

—126.636

—120.663

—110.187

—61.685

—49.631

—44.124

—43.308

—13.683

240 230 220 210 200 190 180 170 160 150 140 130 120 110 100 90 80 70 60 50 40 30 20 10 0 -10

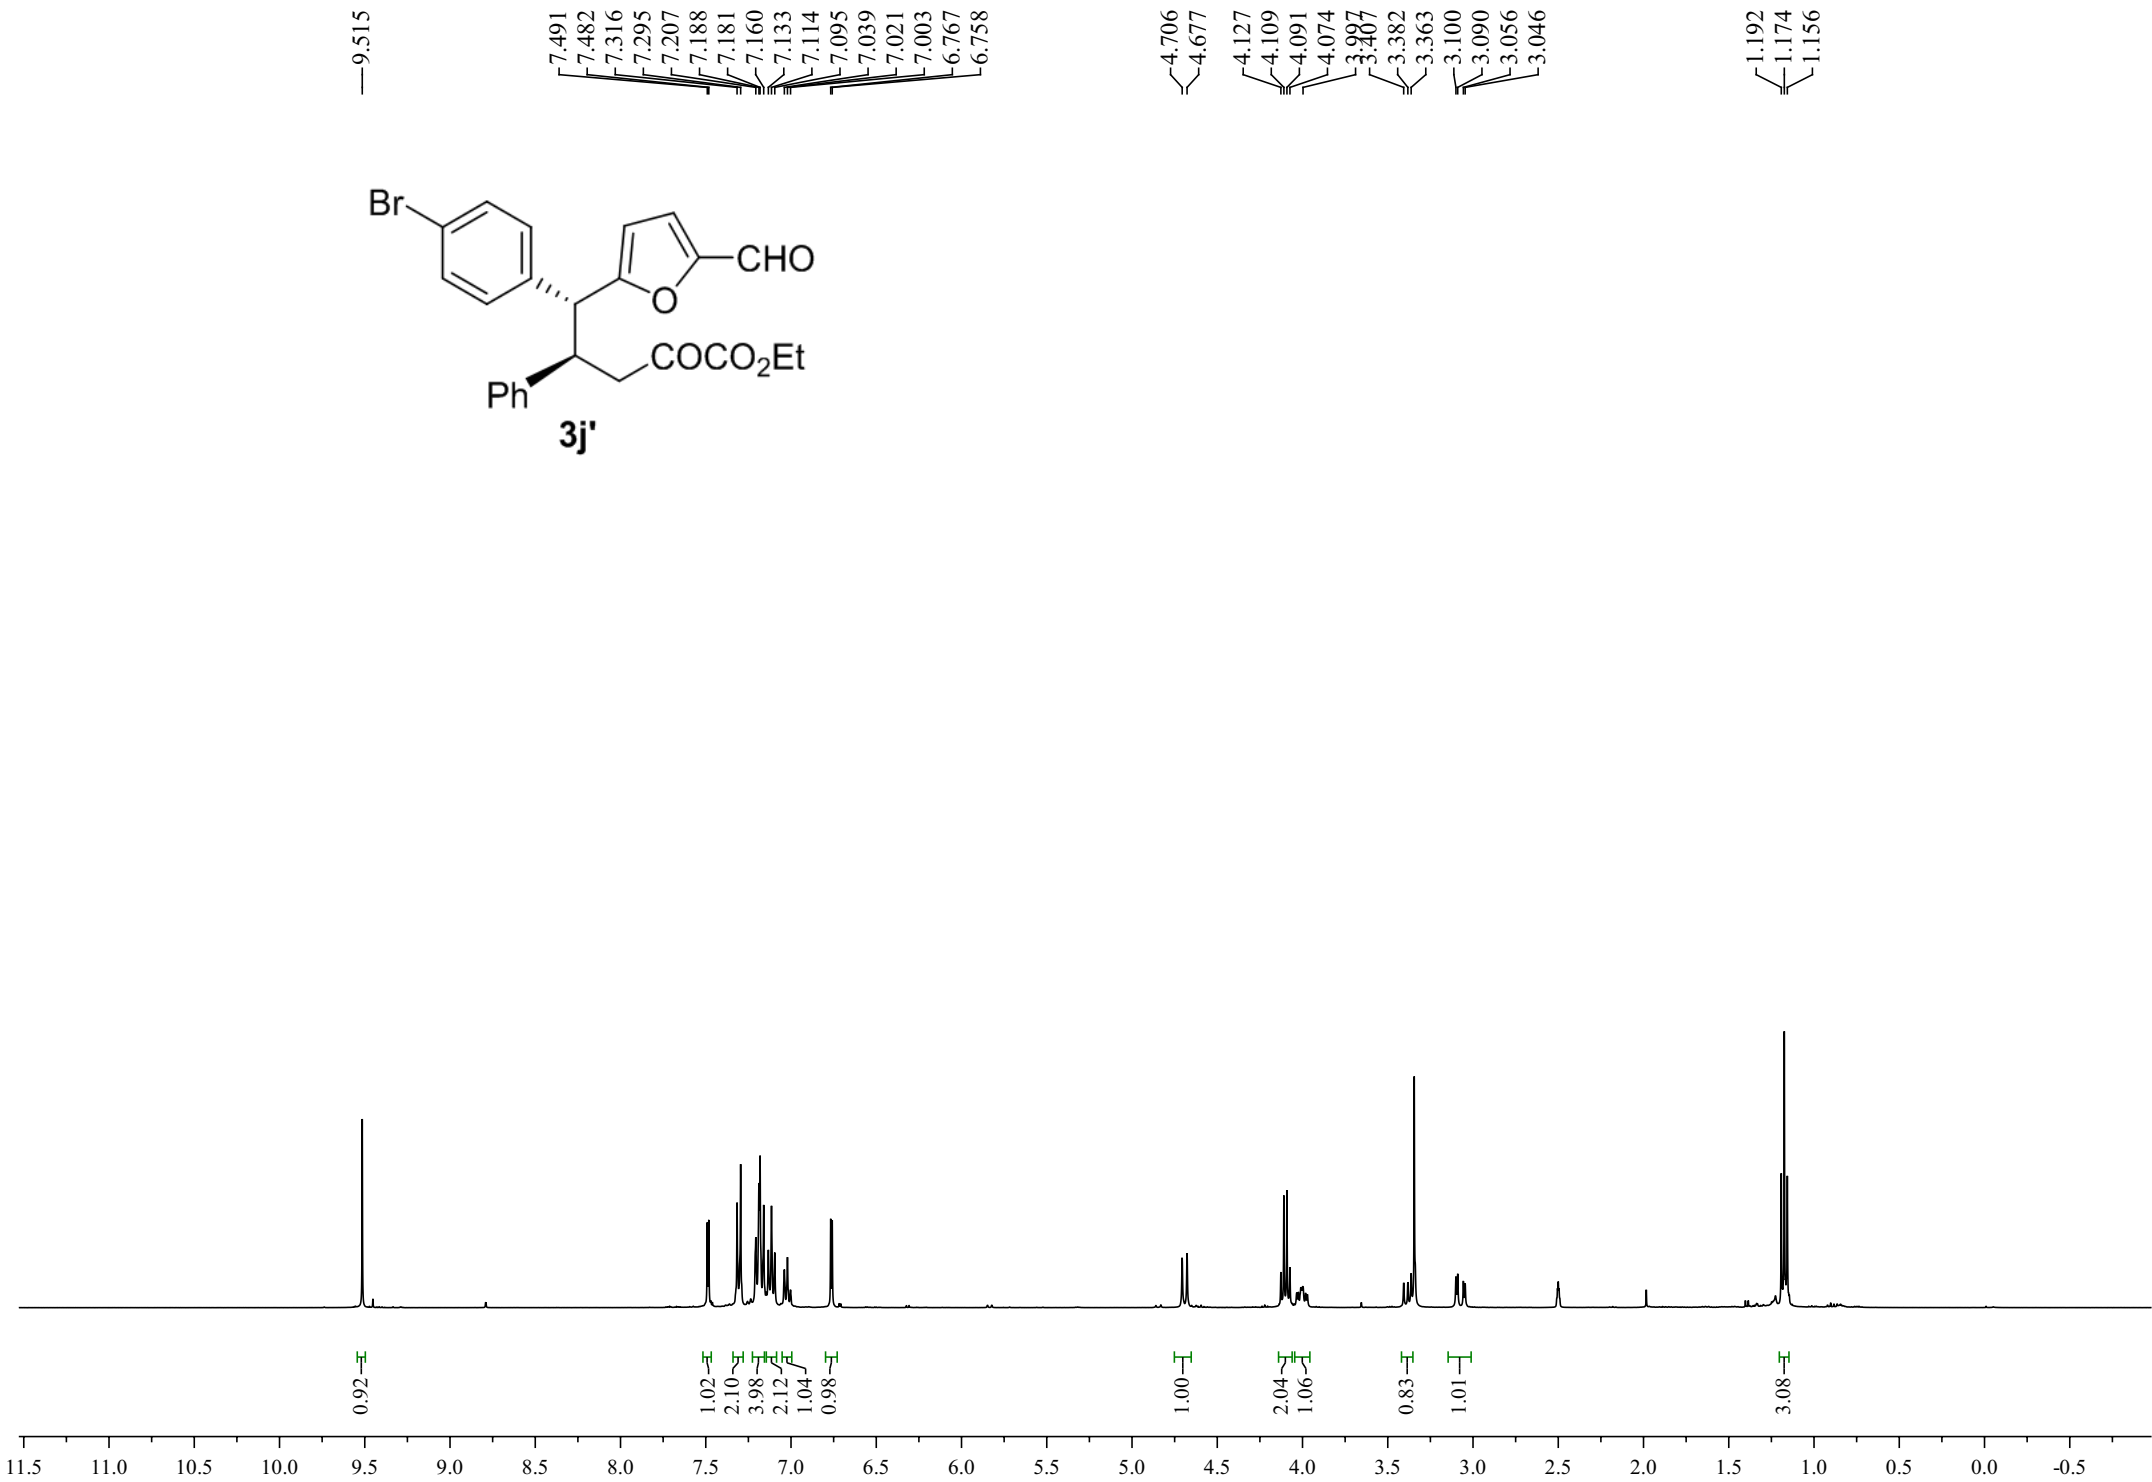

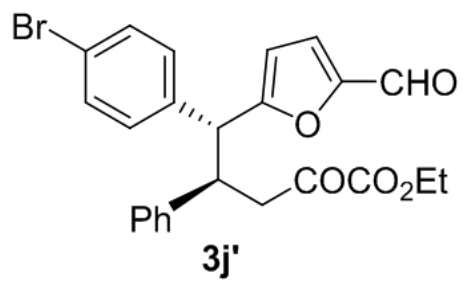

— 191.687  
— 177.712  
— 161.951  
— 159.912  
— 151.893  
— 140.920  
— 138.681  
— 131.043  
— 130.658  
— 128.320  
— 127.982  
— 119.785  
— 110.571

— 61.727  
— 49.221  
— 44.056  
— 43.927

— 13.686

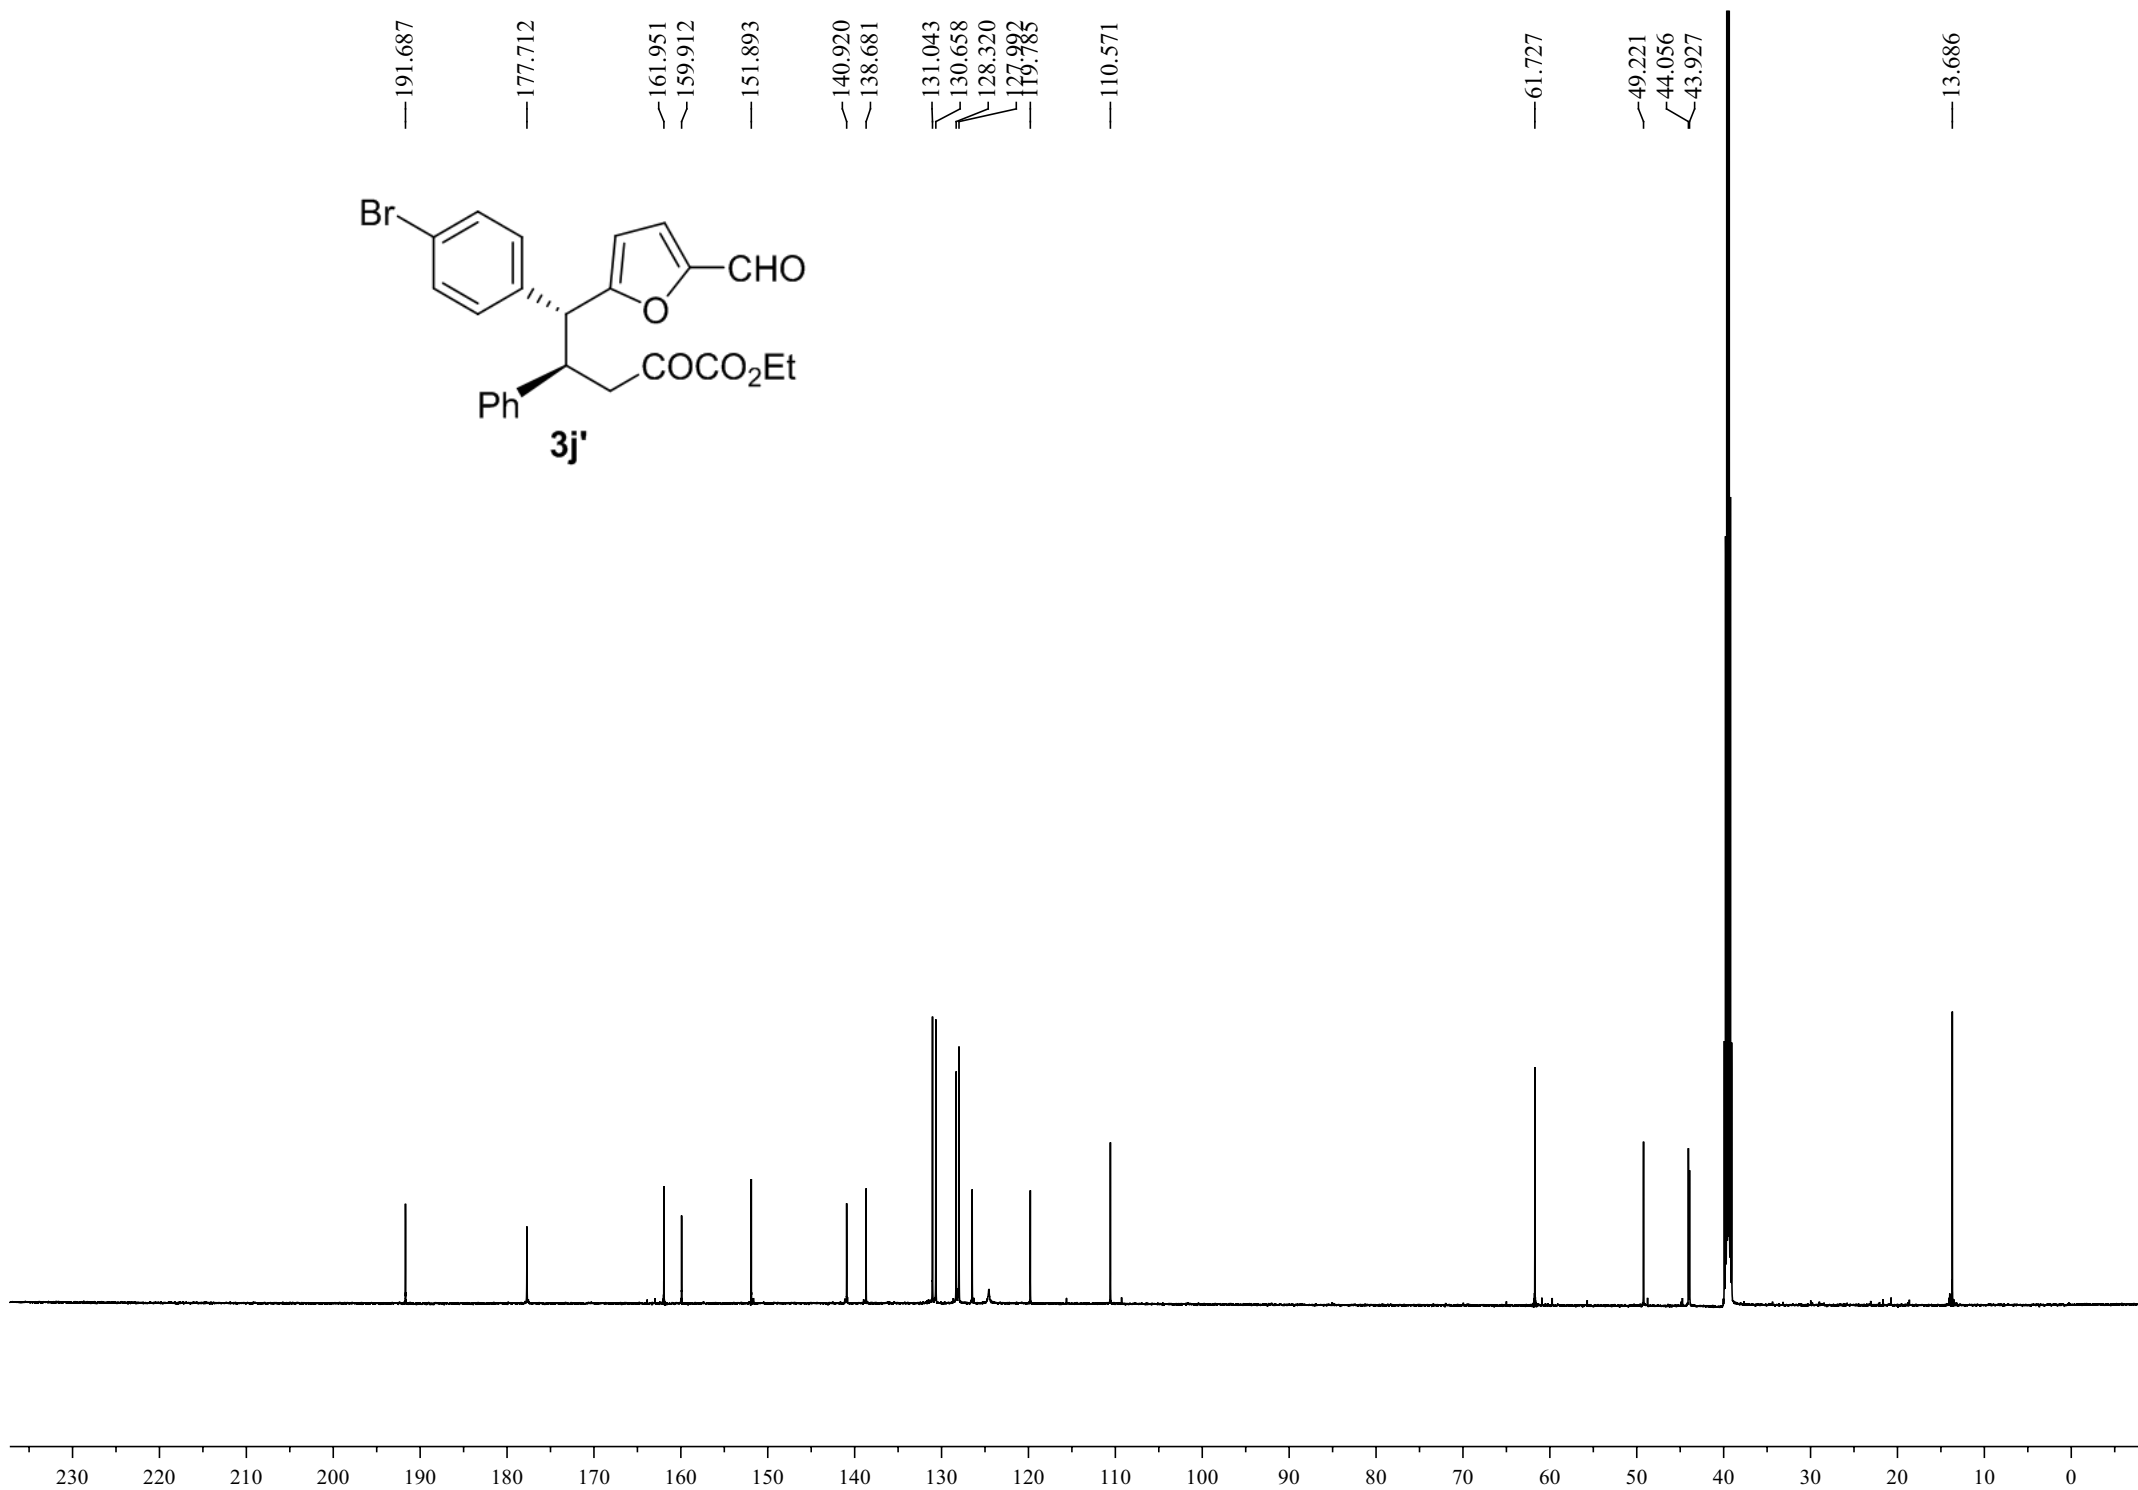

9.338  
7.642  
7.638  
7.348  
7.330  
7.269  
7.263  
7.260  
7.252  
7.250  
7.241  
7.232  
7.213  
7.194  
7.175  
7.119  
7.109  
6.499  
6.490

4.816  
4.787  
4.123  
4.105  
4.090  
4.072  
4.054  
4.036  
3.516  
3.299  
3.273  
2.913  
2.904  
2.870  
2.860

1.163  
1.146  
1.128

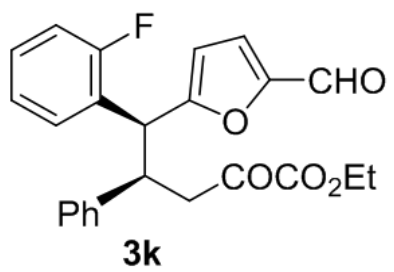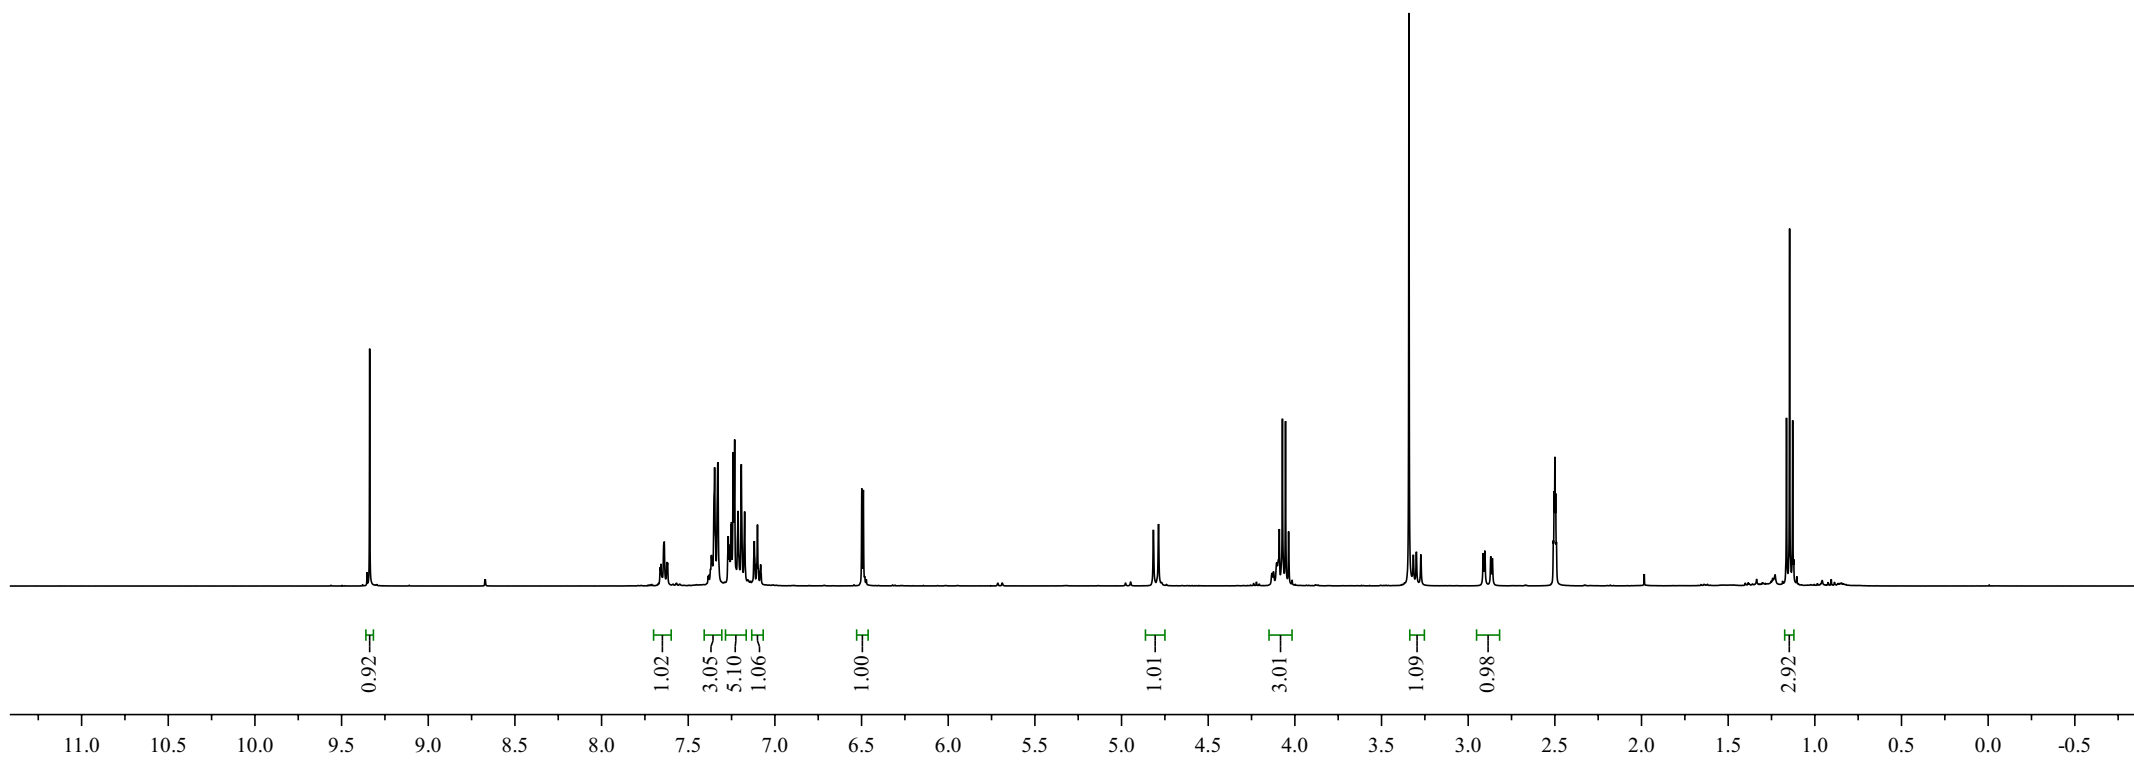



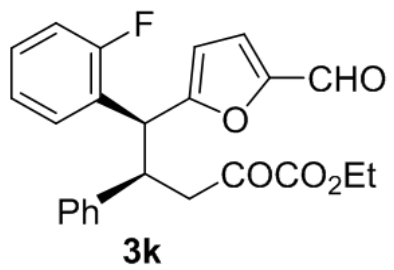

—191.821  
—177.507  
—161.065  
—159.830  
—158.862  
—151.103  
—141.301  
—129.715  
—128.175  
—128.069  
—126.773  
—125.140  
—123.997  
—115.775  
—110.613

—61.715

—43.542  
—43.169  
—43.049

—13.668

240 230 220 210 200 190 180 170 160 150 140 130 120 110 100 90 80 70 60 50 40 30 20 10 0 -10

S161



—116.780

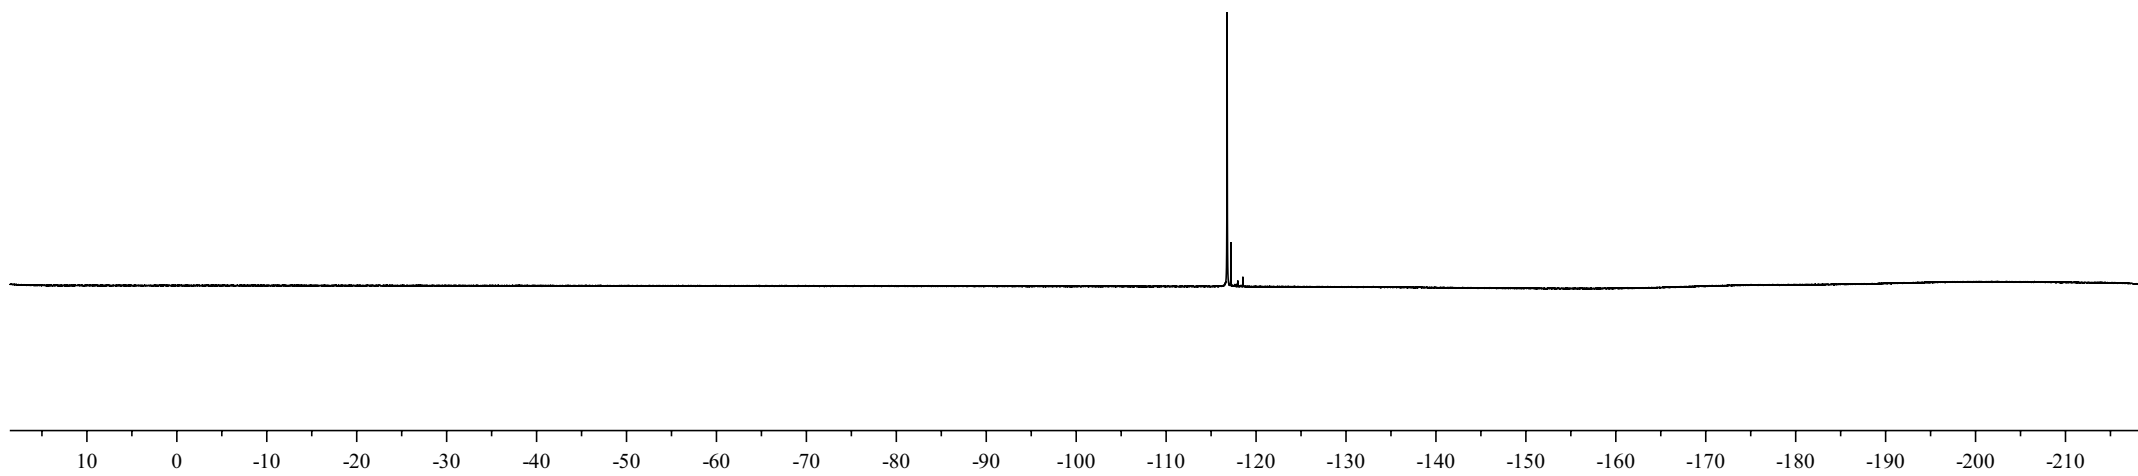

S162

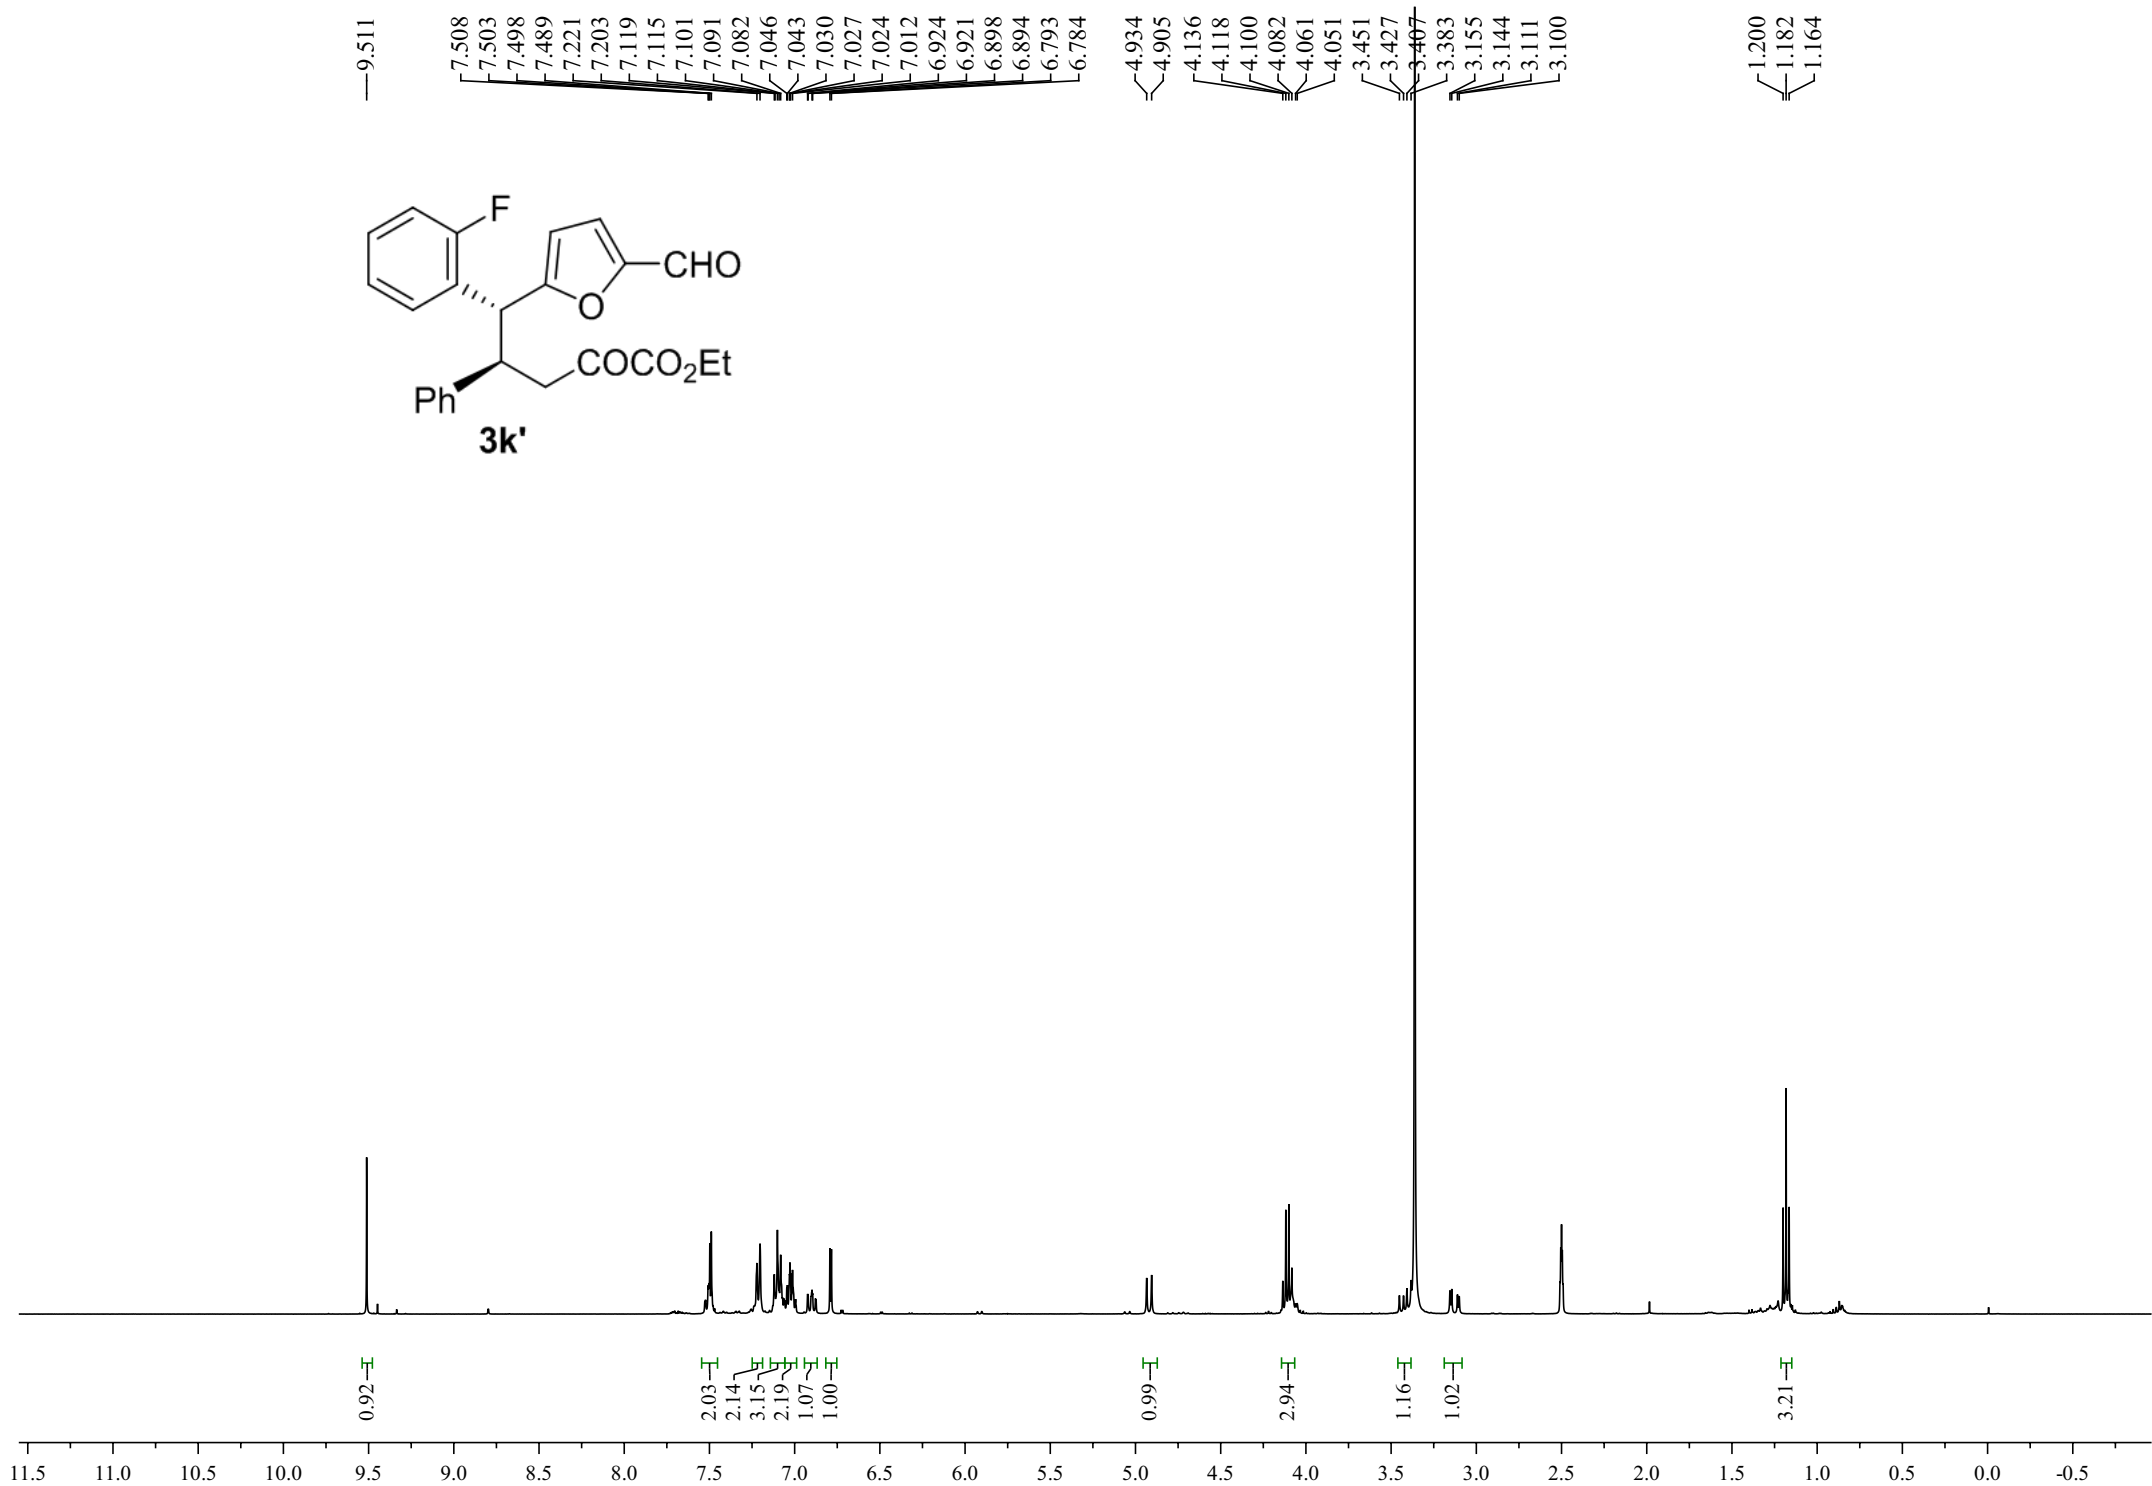

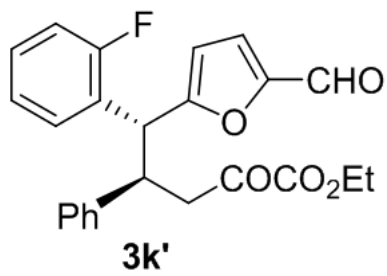

—191.775  
—177.815  
161.243  
160.729  
159.958  
158.297  
151.868  
—140.891  
130.255  
130.218  
128.107  
127.968  
126.590  
124.405  
115.288  
115.064  
110.813

—61.780

43.967  
43.328  
40.742

—13.729

240 230 220 210 200 190 180 170 160 150 140 130 120 110 100 90 80 70 60 50 40 30 20 10 0 -10

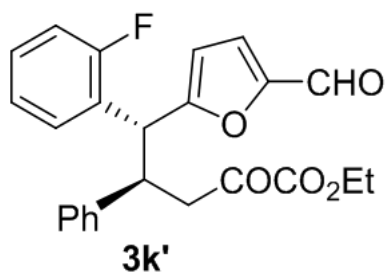

—-117.159

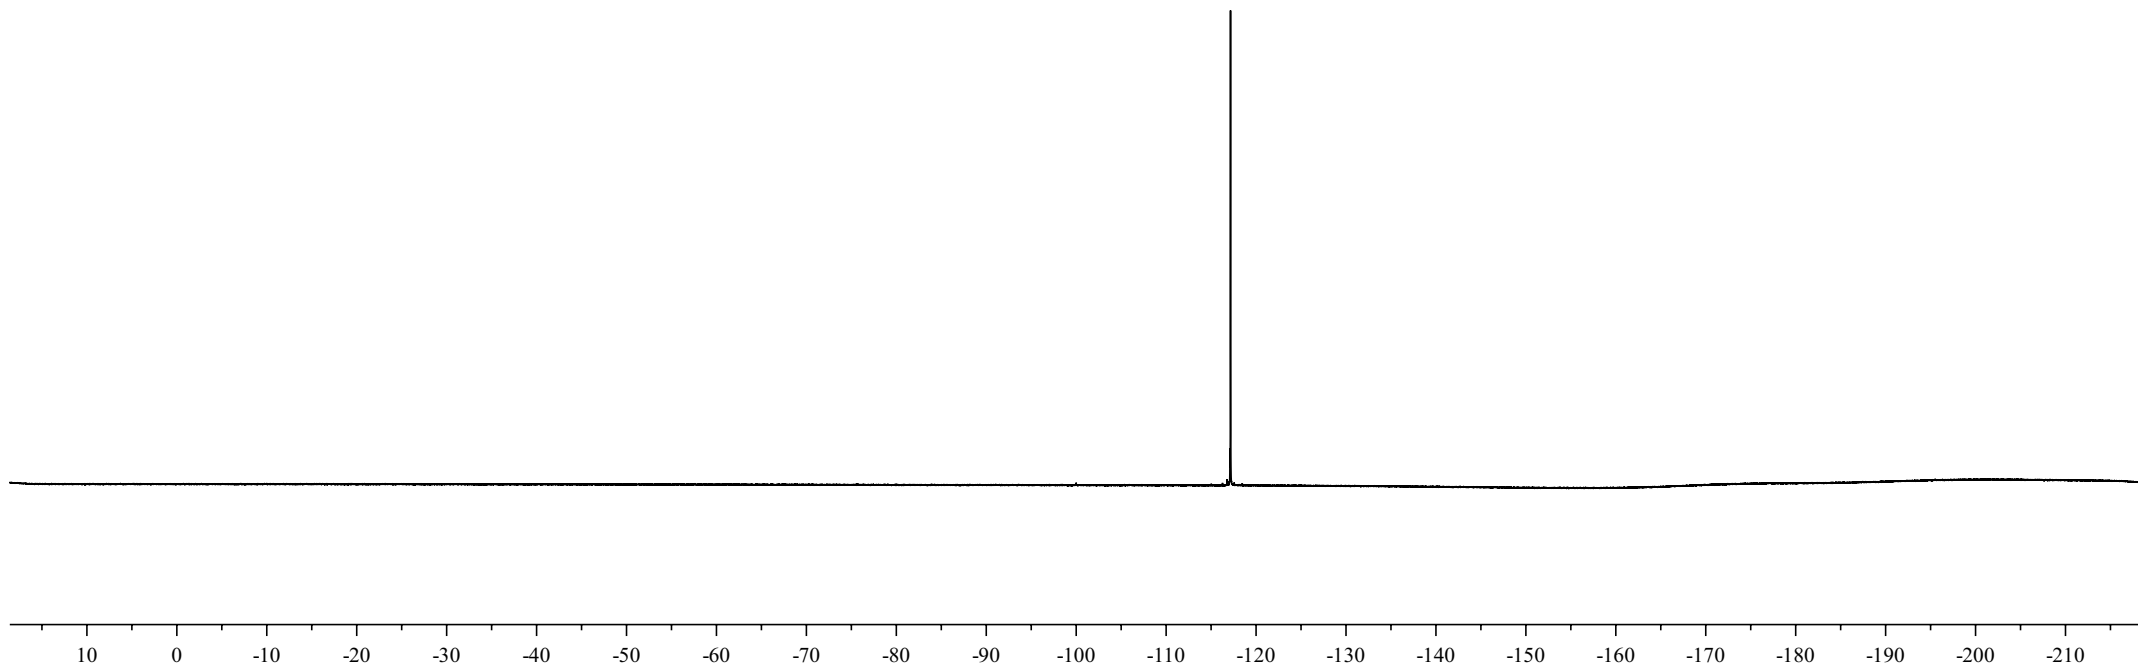

S165

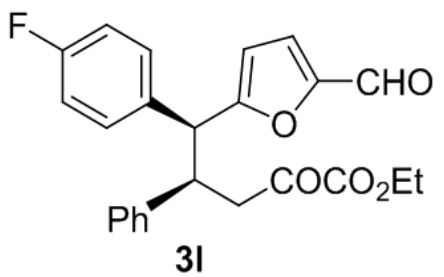

9.333  
 7.572  
 7.564  
 7.550  
 7.355  
 7.352  
 7.334  
 7.237  
 7.227  
 7.218  
 7.214  
 7.202  
 7.192  
 7.184  
 7.165  
 7.083  
 6.499  
 6.490

4.667  
 4.637  
 4.084  
 4.067  
 4.049  
 4.032  
 4.015  
 3.290  
 3.246  
 3.221  
 2.856  
 2.846  
 2.812  
 2.802

1.160  
 1.143  
 1.125

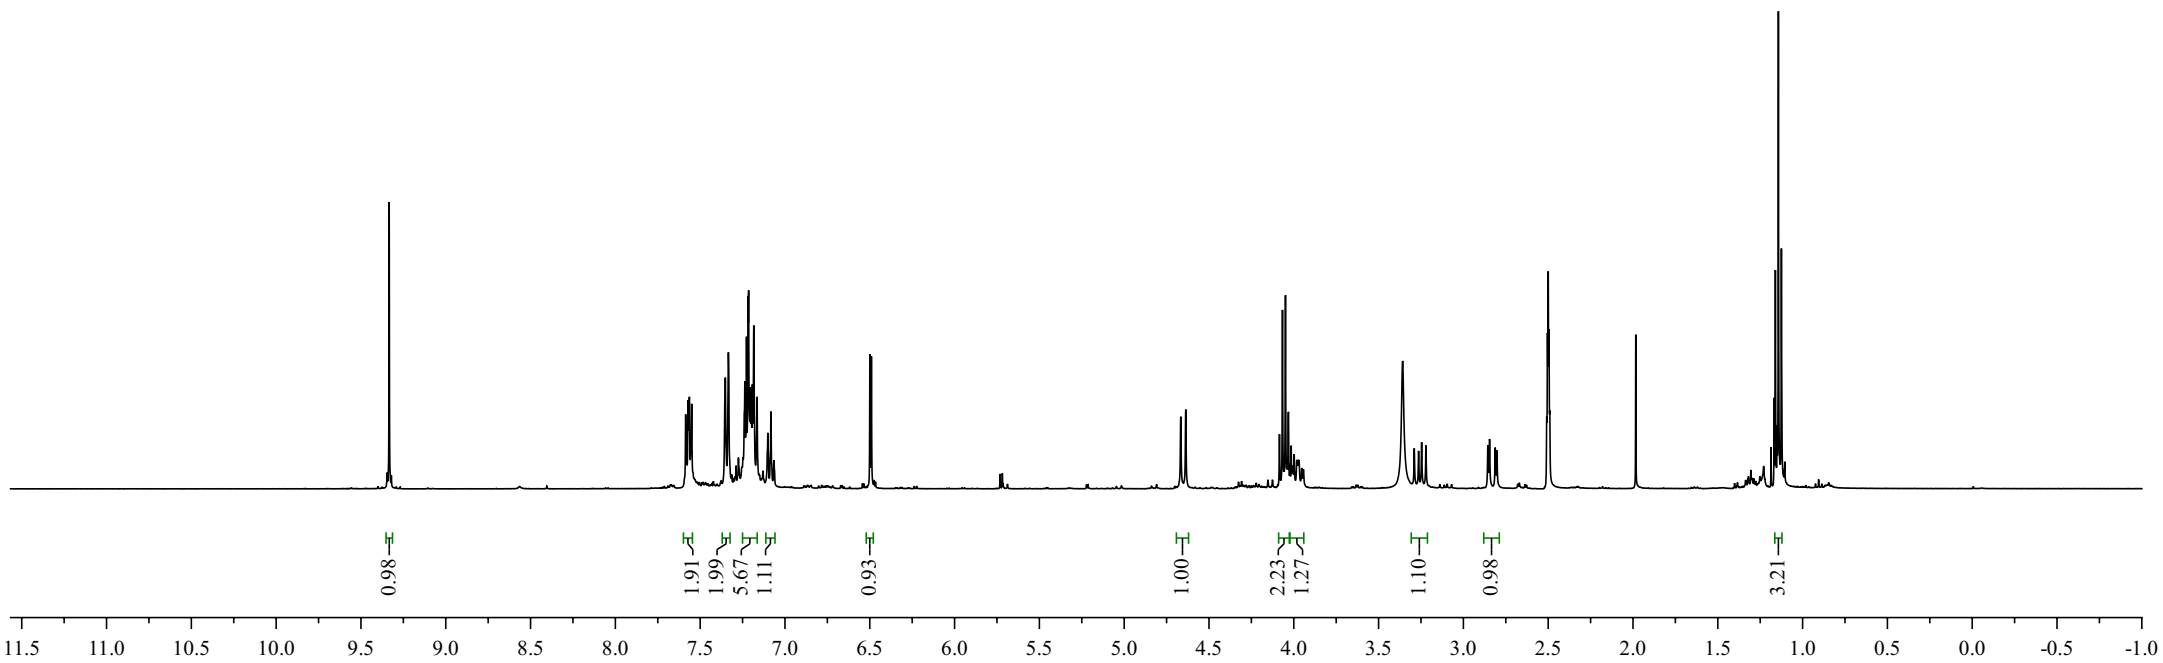

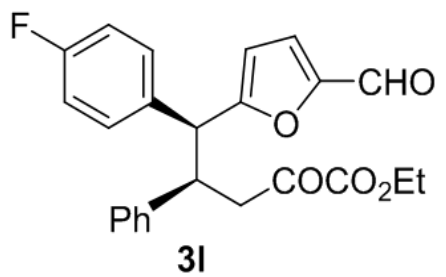

— 192.063

— 177.407

— 162.472

— 160.176

— 159.900

— 151.068

— 141.737

— 135.712

— 130.486

— 130.405

— 128.079

— 128.044

— 126.614

— 115.761

— 115.549

— 110.054

— 61.677

— 49.492

— 44.414

— 43.347

— 13.661

240 230 220 210 200 190 180 170 160 150 140 130 120 110 100 90 80 70 60 50 40 30 20 10 0 -10

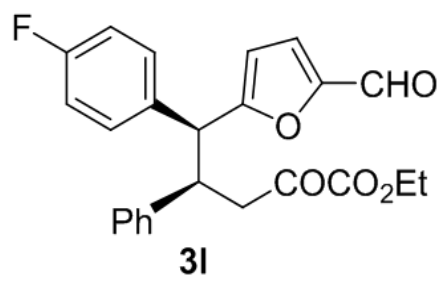

—115.084

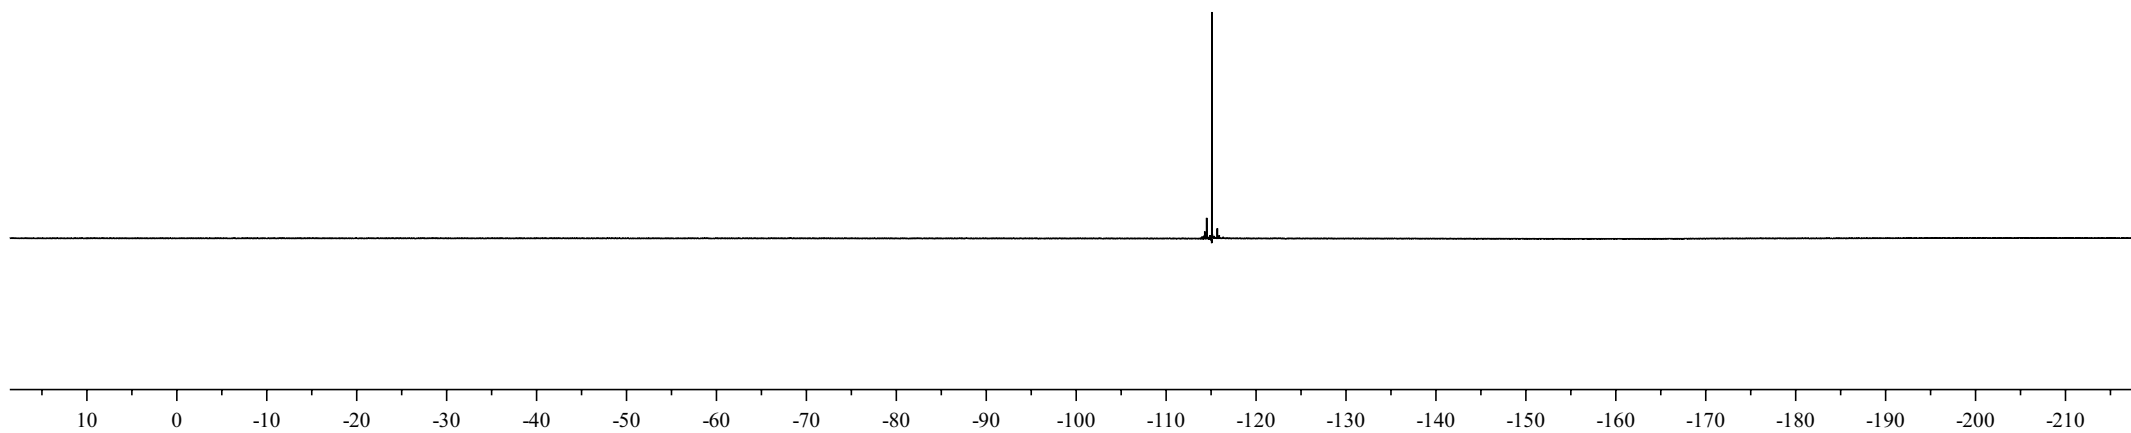

S168



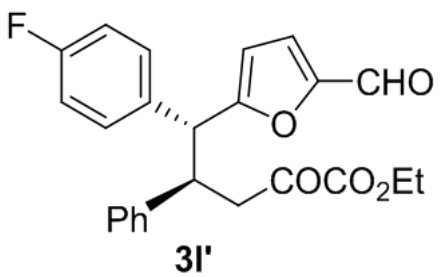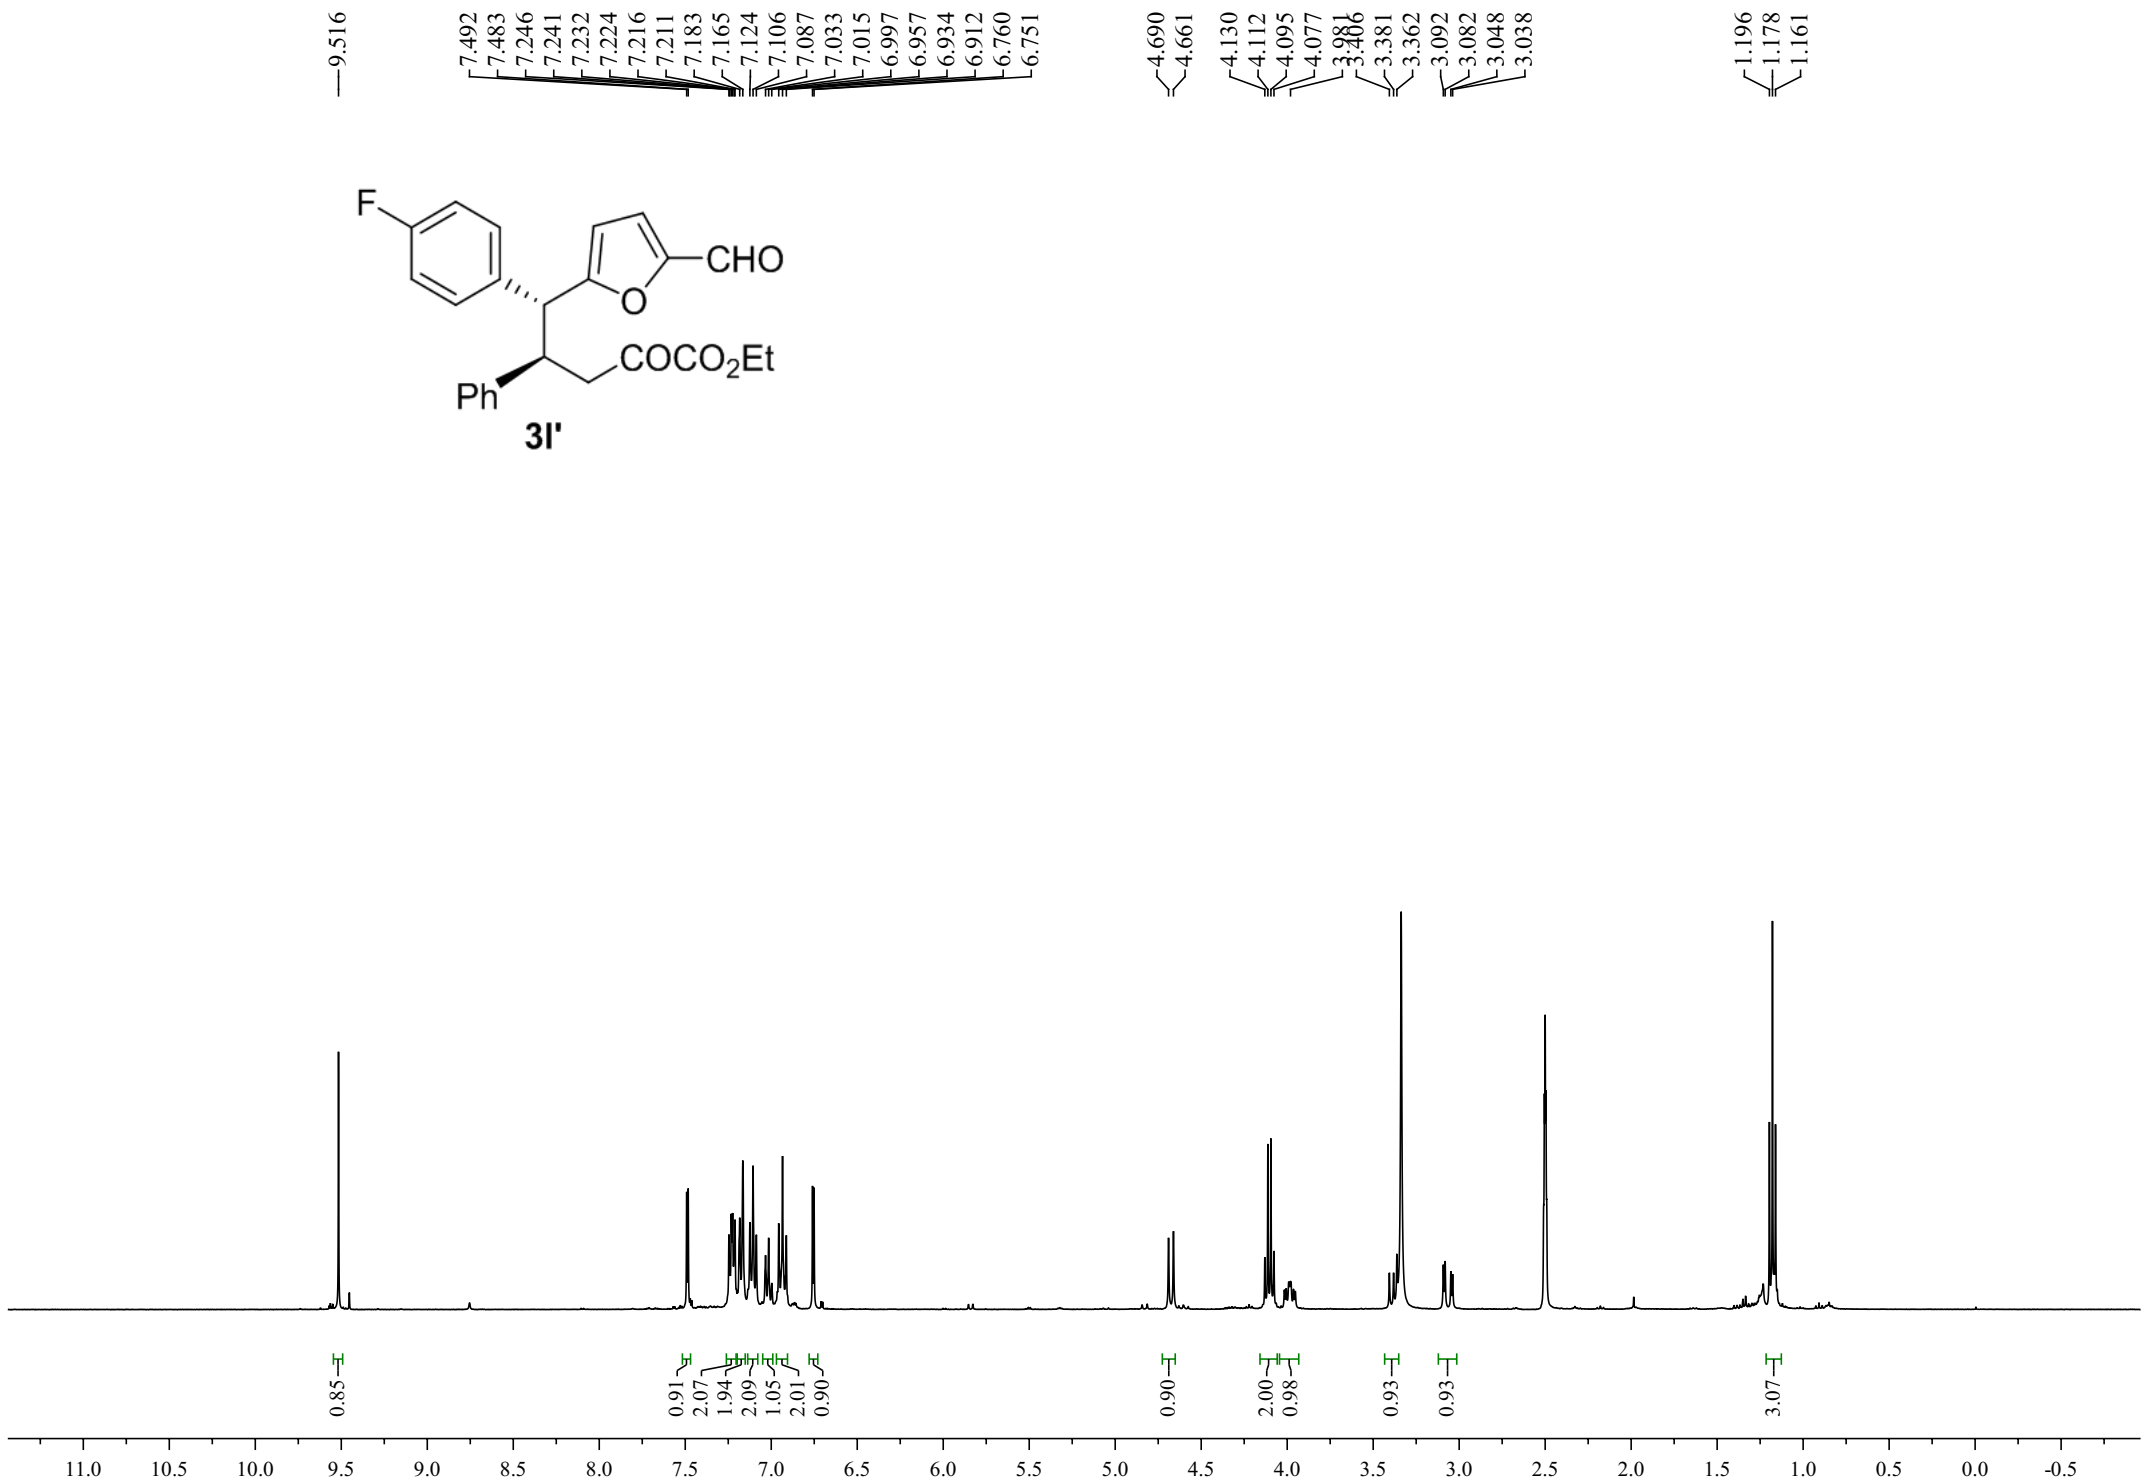

—191.770  
—177.722  
162.360  
161.533  
159.943  
—151.851  
141.008  
135.439  
135.419  
130.342  
130.289  
128.320  
127.950  
126.414  
114.969  
114.828  
110.455

—61.737

49.108  
44.388  
43.887

—13.698

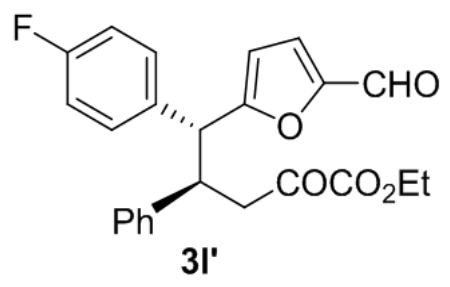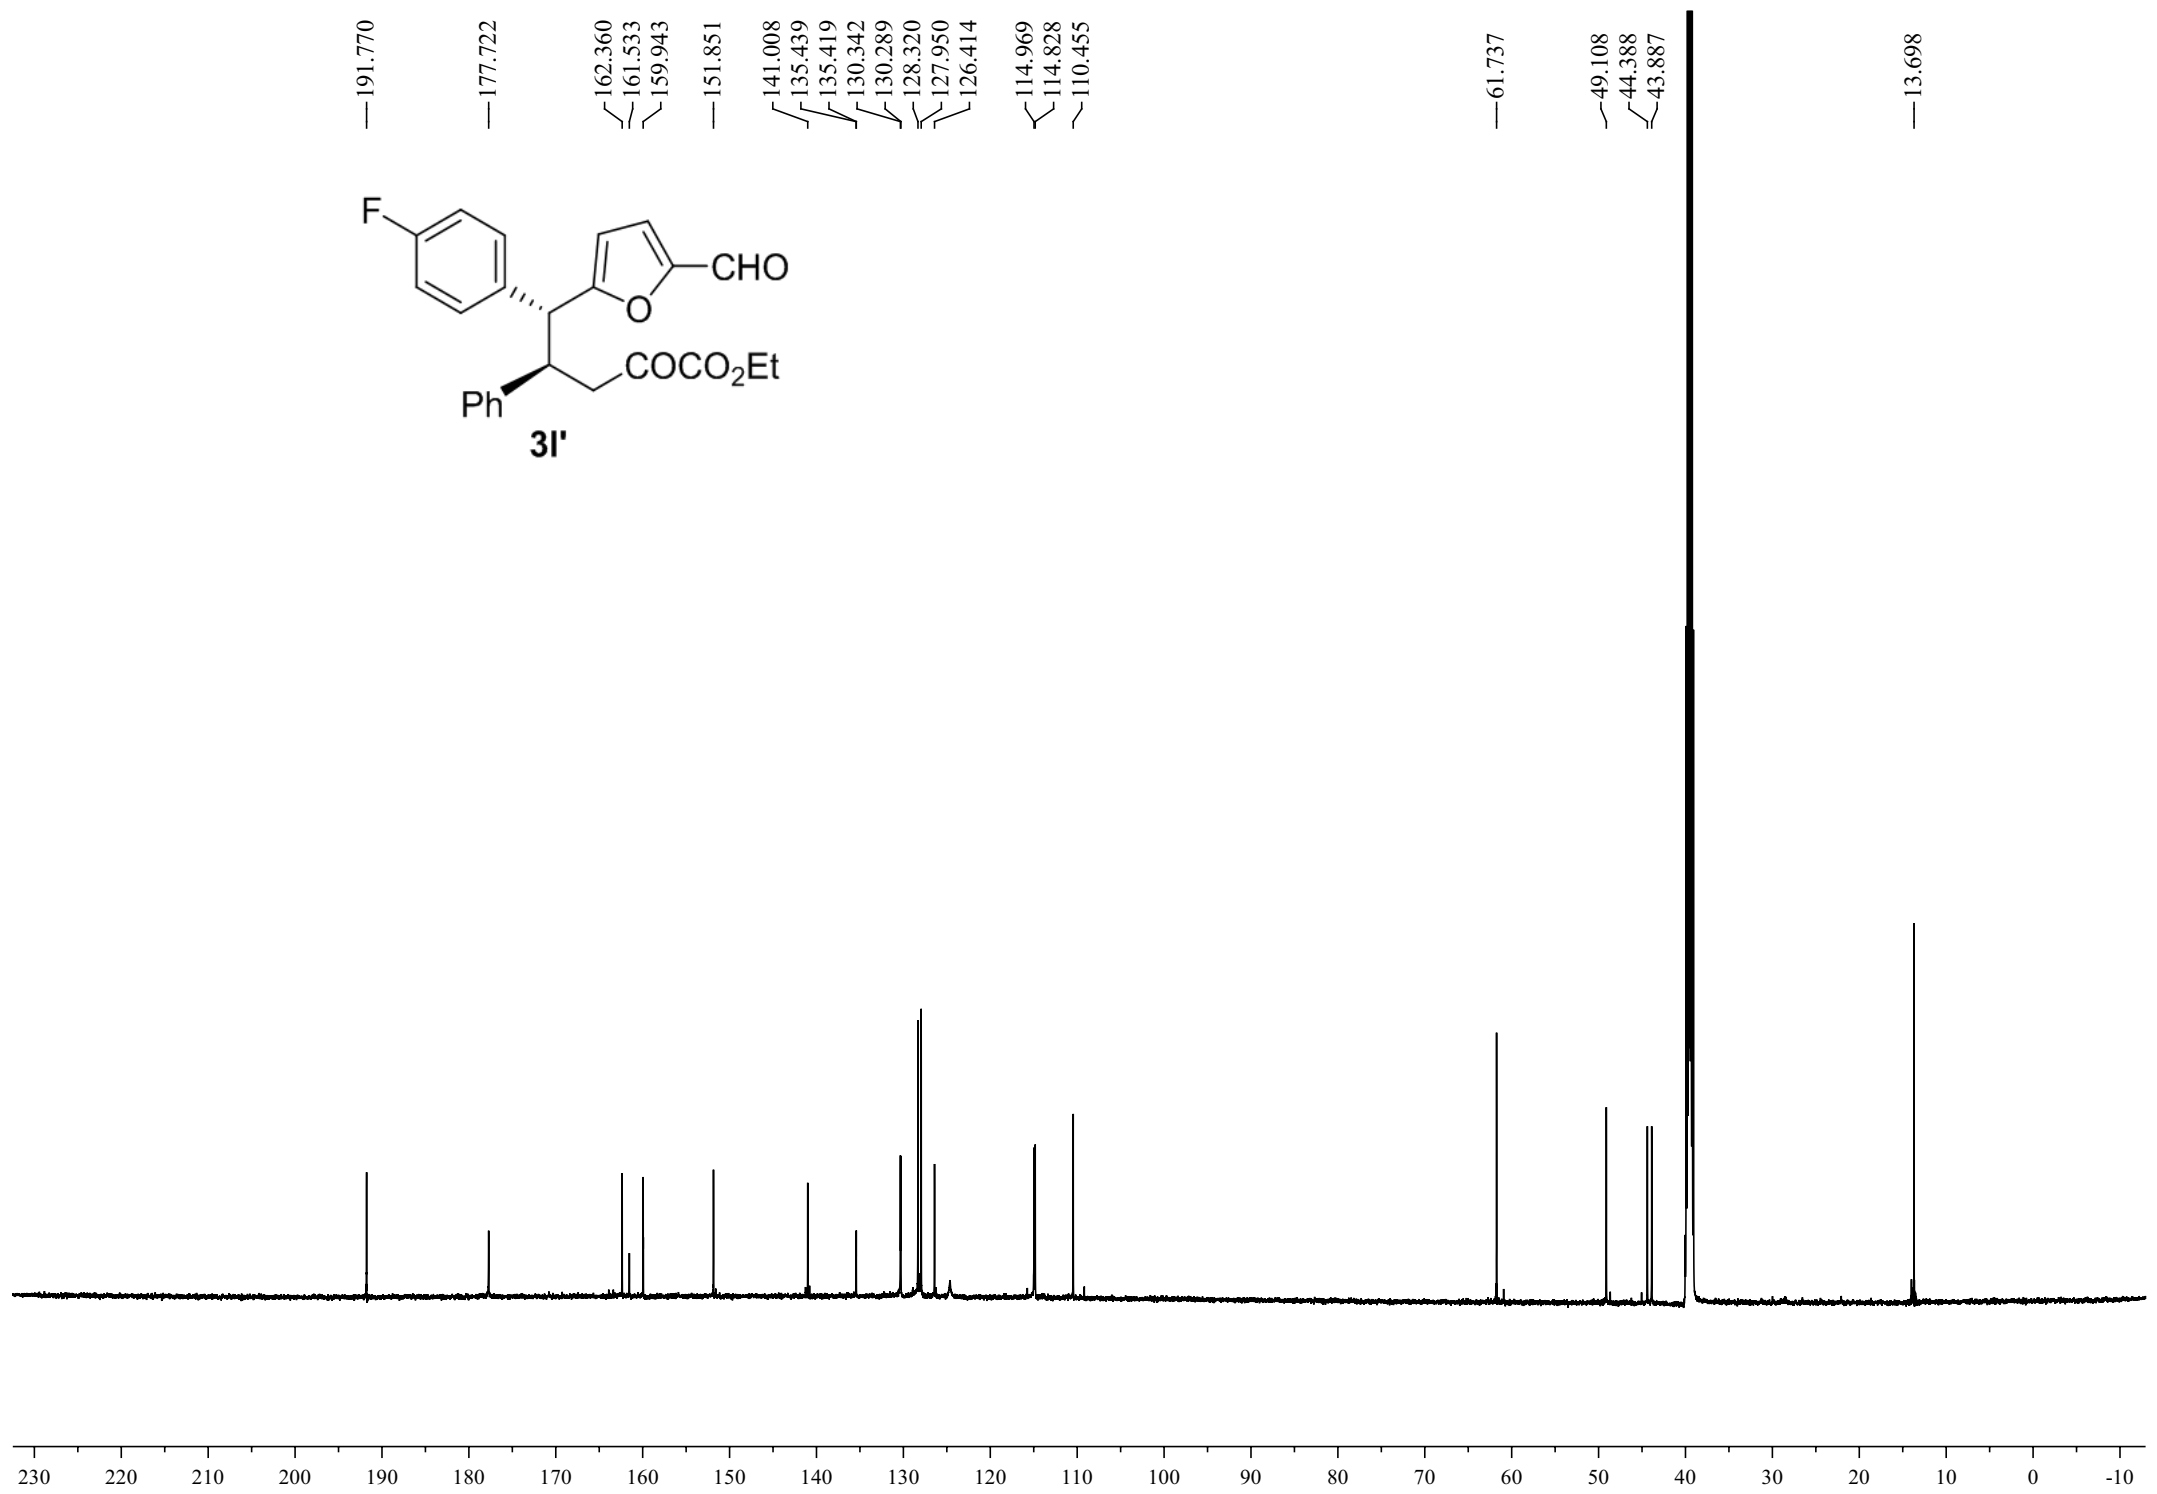

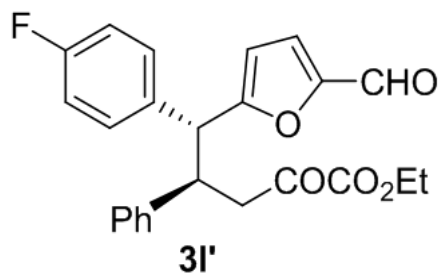

—-115.957

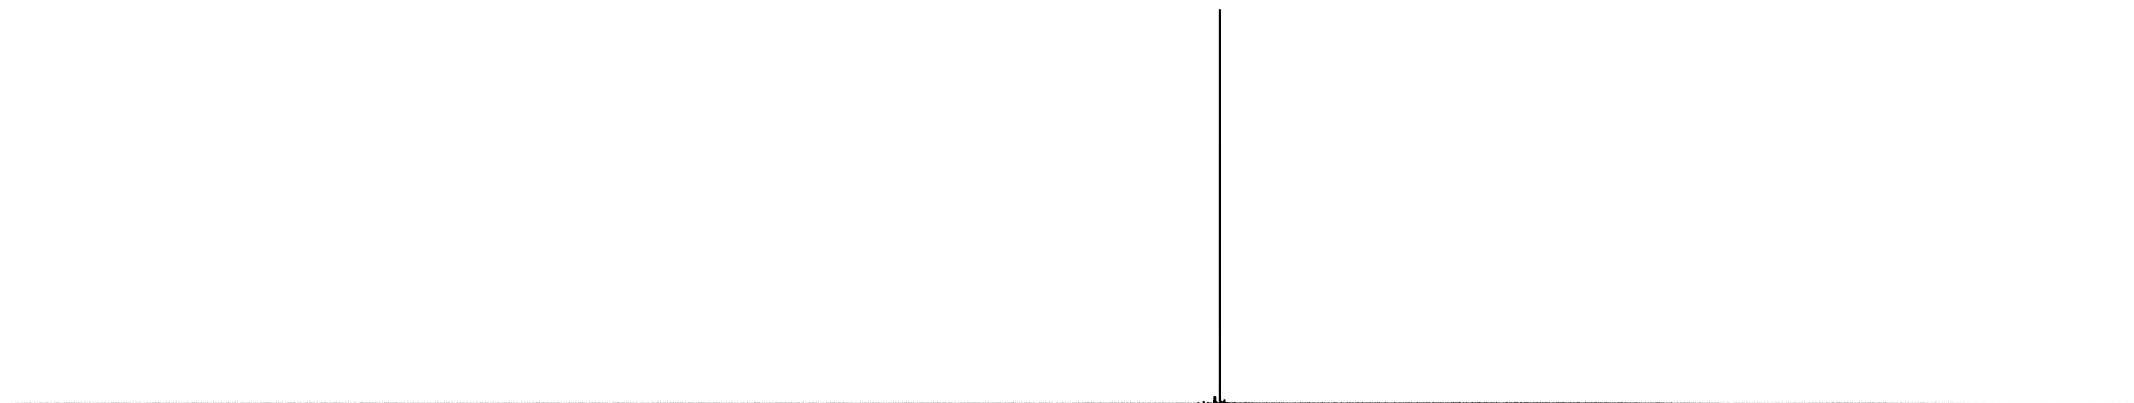

S171

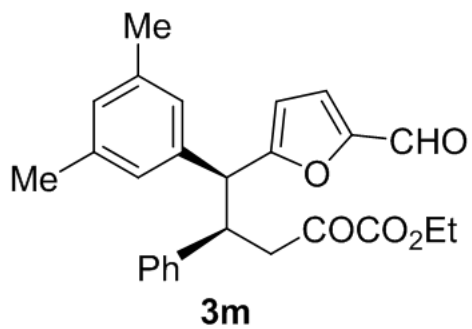

9.316  
 7.360  
 7.342  
 7.218  
 7.209  
 7.196  
 7.177  
 7.158  
 7.123  
 7.092  
 7.074  
 7.056  
 6.896  
 6.506  
 6.497

4.504  
 4.474  
 4.079  
 4.062  
 4.044  
 4.026  
 3.279  
 3.235  
 3.210  
 2.856  
 2.846  
 2.813  
 2.803  
 2.262

1.160  
 1.142  
 1.124

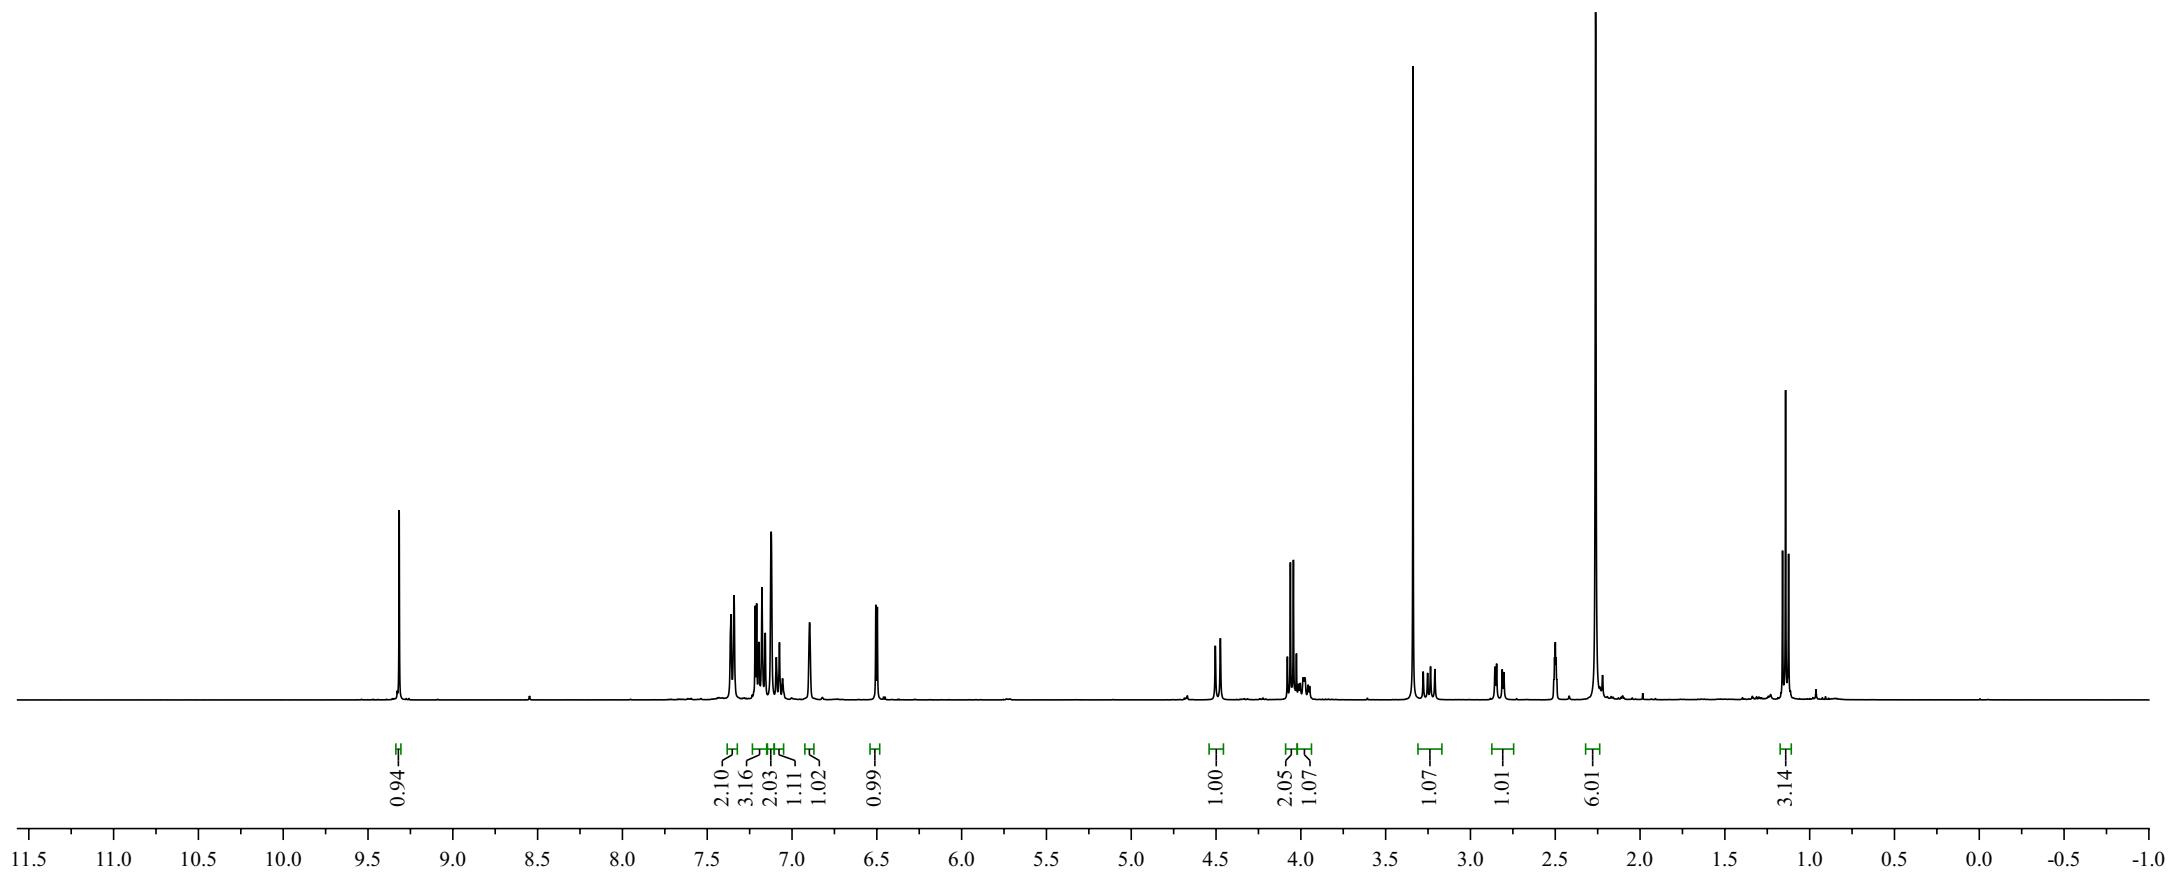

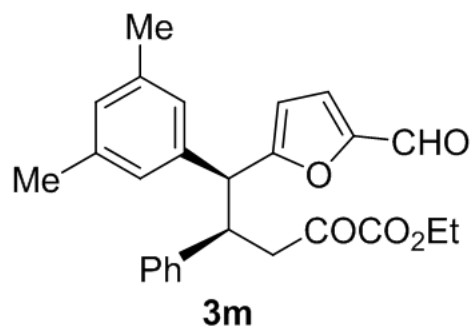

— 192.214  
— 177.328  
— 162.970  
— 159.925  
— 150.909  
— 141.886  
— 139.435  
— 137.852  
— 128.829  
— 128.060  
— 126.541  
— 126.132  
— 109.901

— 61.661  
— 50.397  
— 44.187  
— 43.562

— 20.967  
— 13.660

240 230 220 210 200 190 180 170 160 150 140 130 120 110 100 90 80 70 60 50 40 30 20 10 0 -10

9.502

7.470 7.461 7.197 7.179 7.130 7.112 7.093 7.035 7.017 6.998 6.807 6.712 6.703 6.652

4.557 4.528

4.128 4.110 4.093 4.075 3.978 3.354 3.339 3.310 3.070 3.060 3.027 3.016

2.094

1.194 1.176 1.158

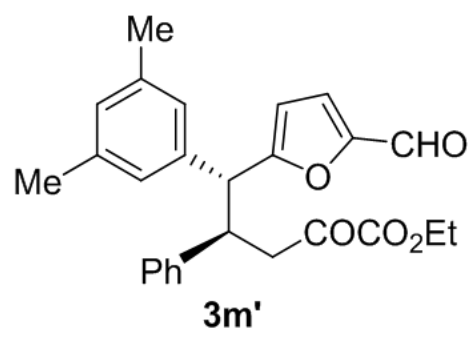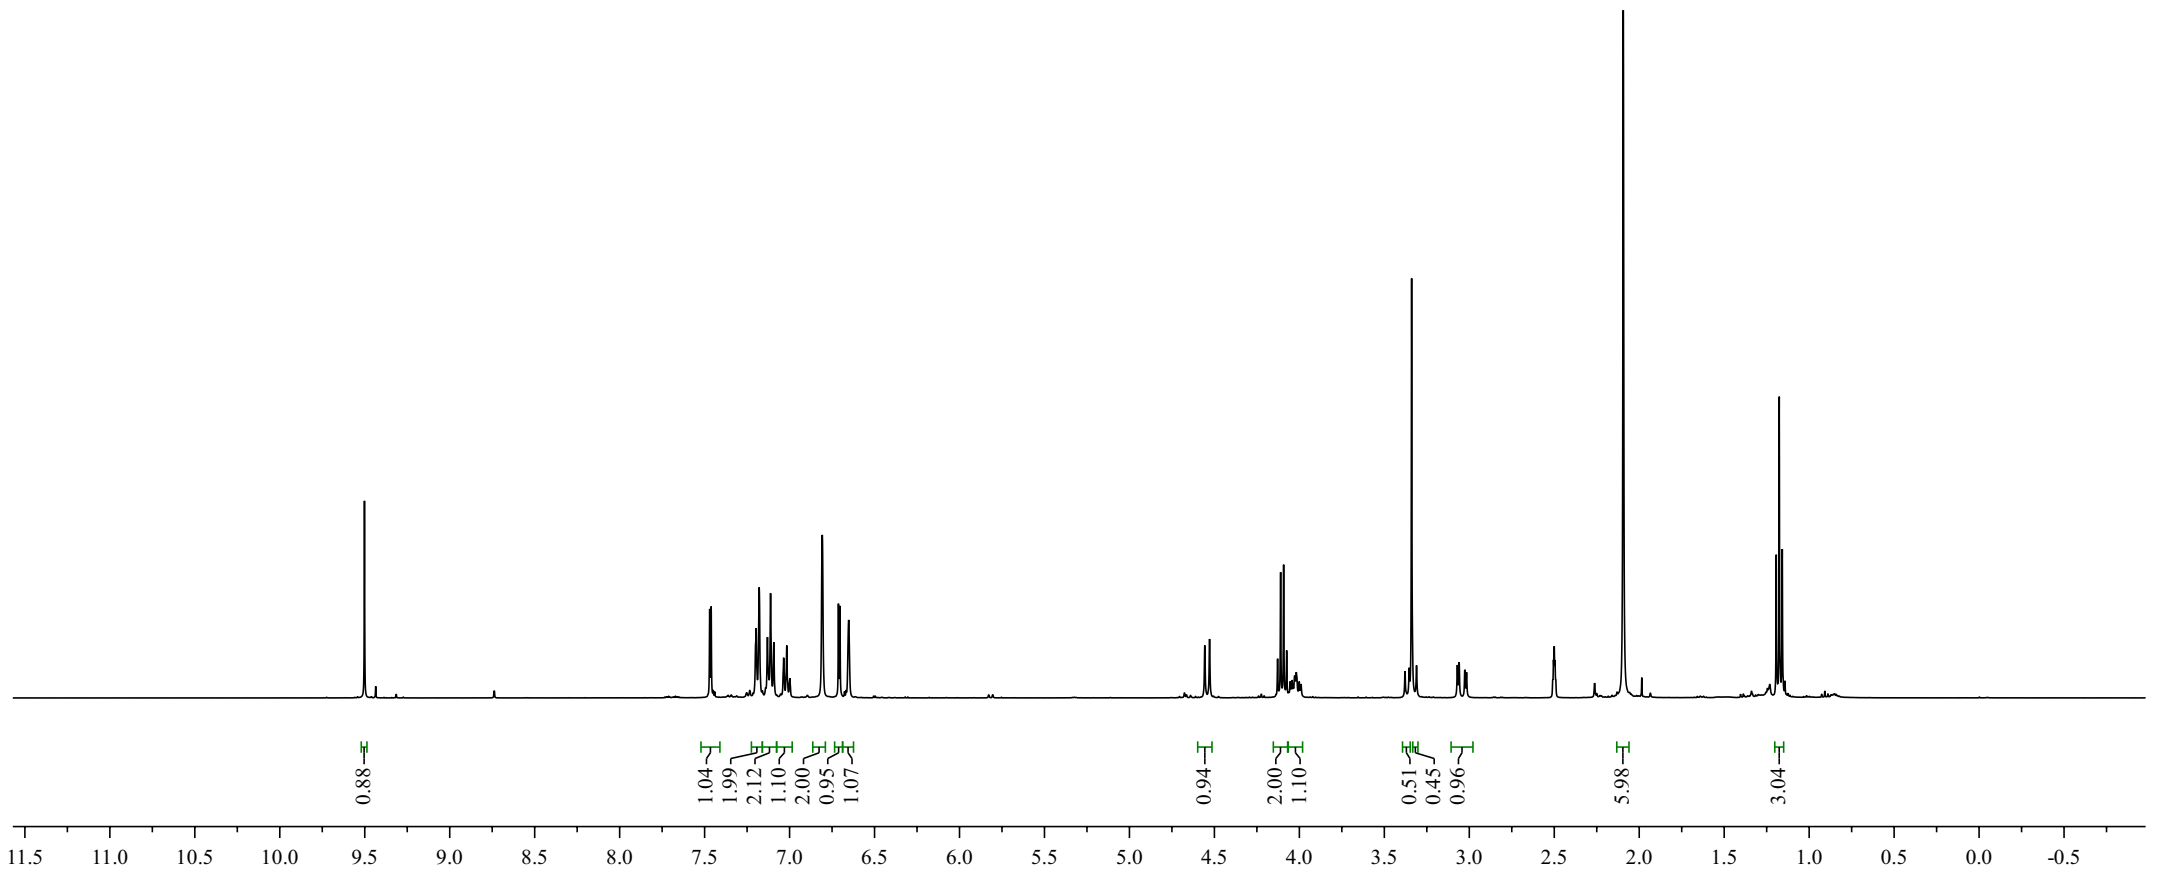

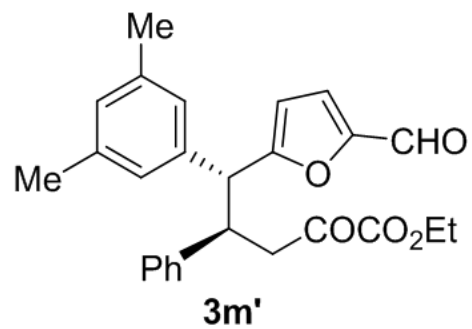

—191.886  
—177.638  
—162.934  
—159.992  
—151.699  
—141.221  
—138.893  
—136.945  
—128.300  
—128.104  
—127.873  
—126.330  
—126.205  
—110.347

—61.722

—49.821

—43.941

—20.801

—13.687

240 230 220 210 200 190 180 170 160 150 140 130 120 110 100 90 80 70 60 50 40 30 20 10 0 -10

9.438  
 7.334  
 7.329  
 7.325  
 7.239  
 7.235  
 7.198  
 7.187  
 7.165  
 7.143  
 7.133  
 7.122  
 7.112  
 6.940  
 6.931  
 6.111  
 6.102

4.308  
 4.280  
 4.162  
 4.157  
 4.144  
 4.133  
 4.126  
 4.108  
 4.095  
 3.258  
 3.235  
 3.215  
 3.191  
 3.018  
 3.007  
 2.975  
 2.964

1.325  
 1.251  
 1.233  
 1.215

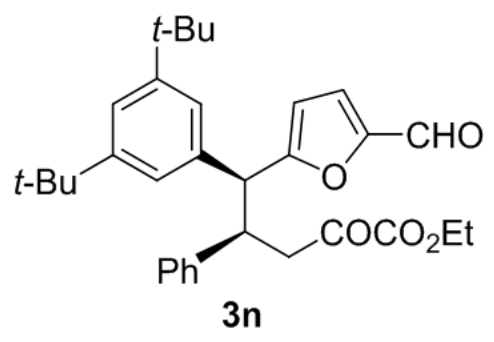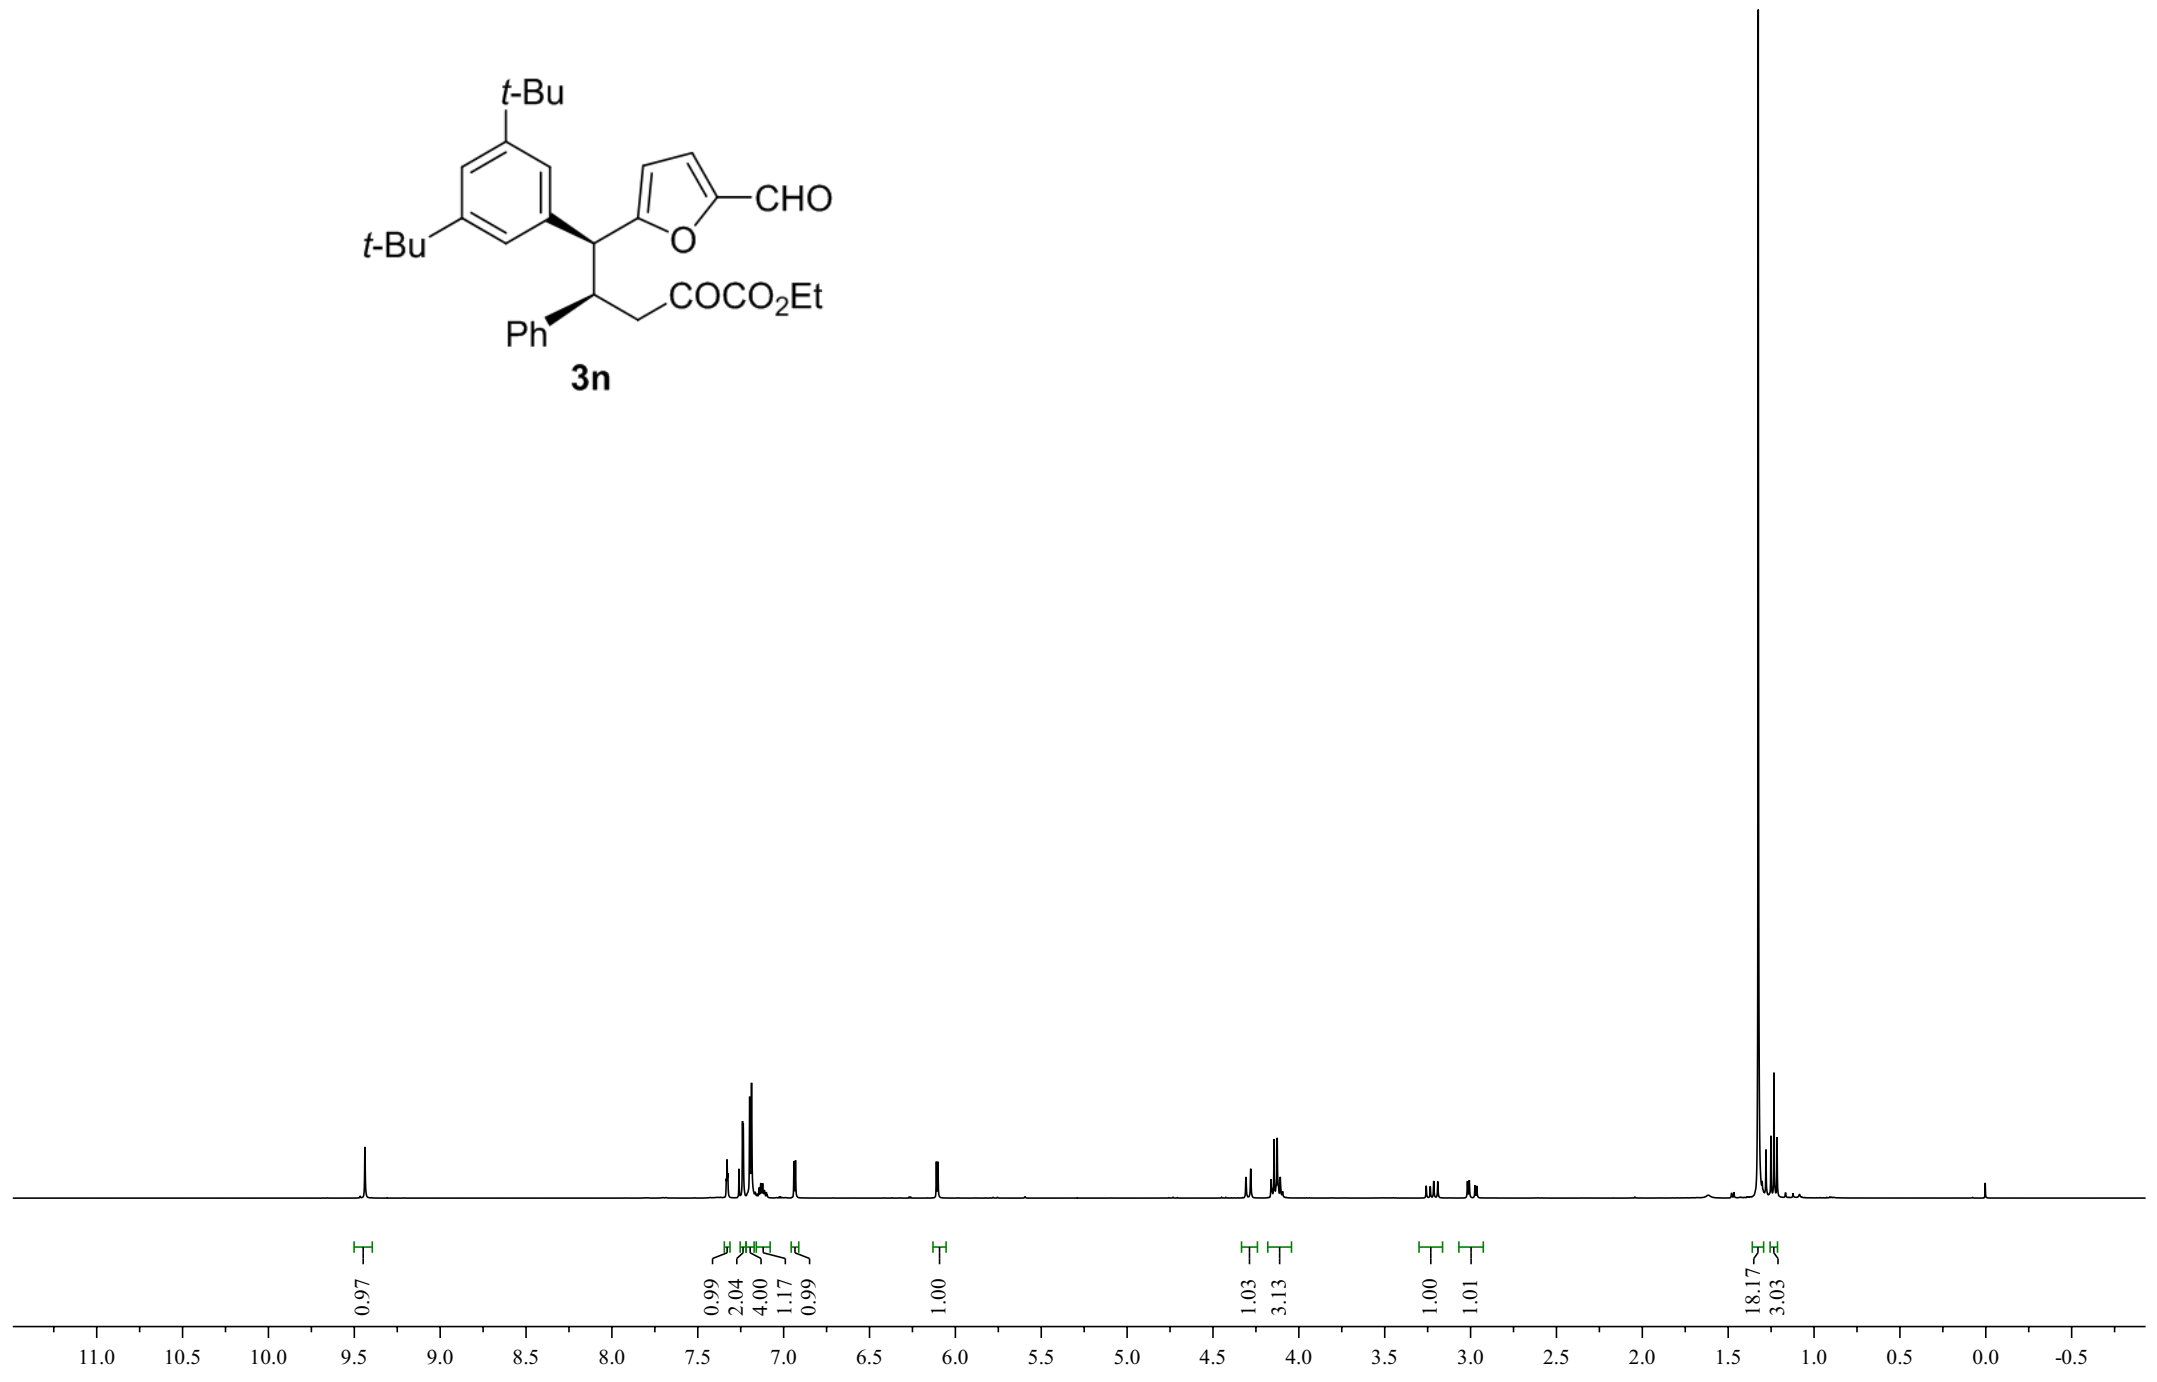



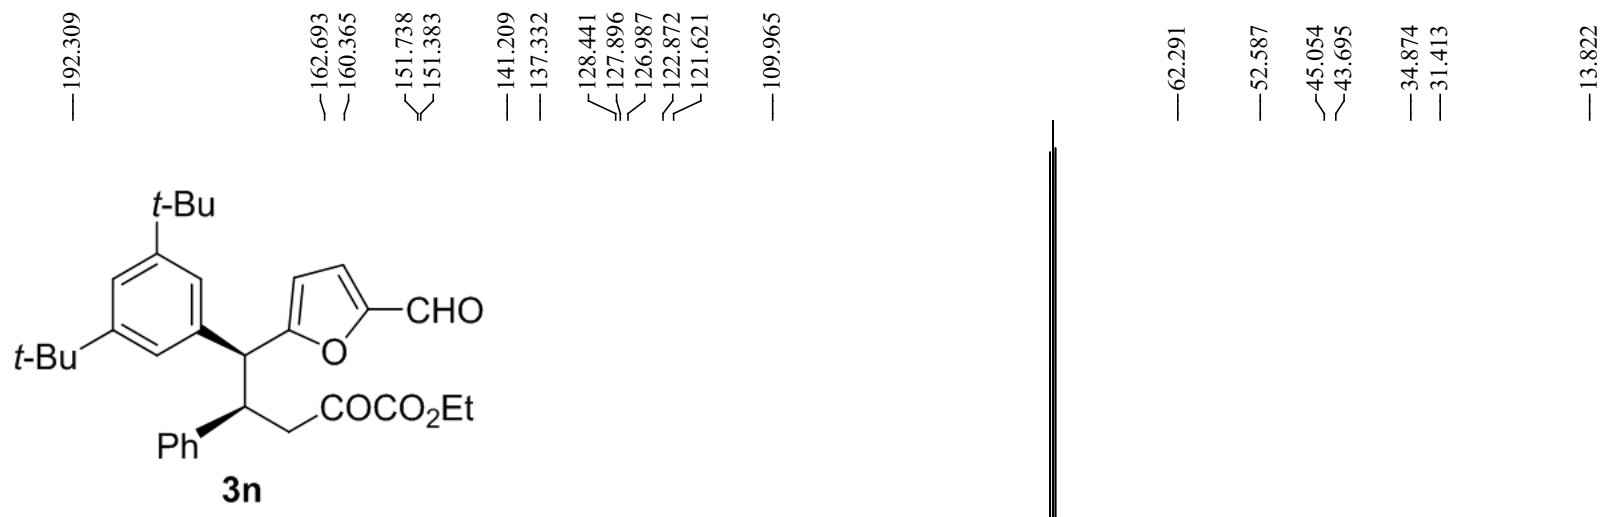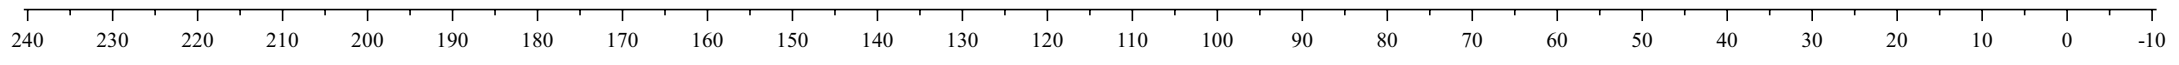

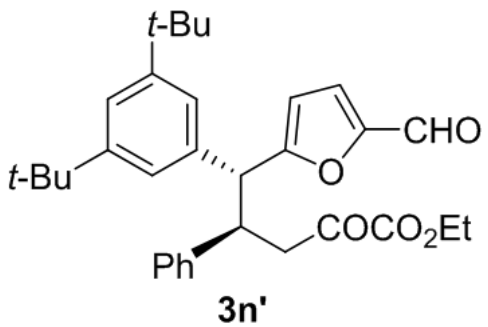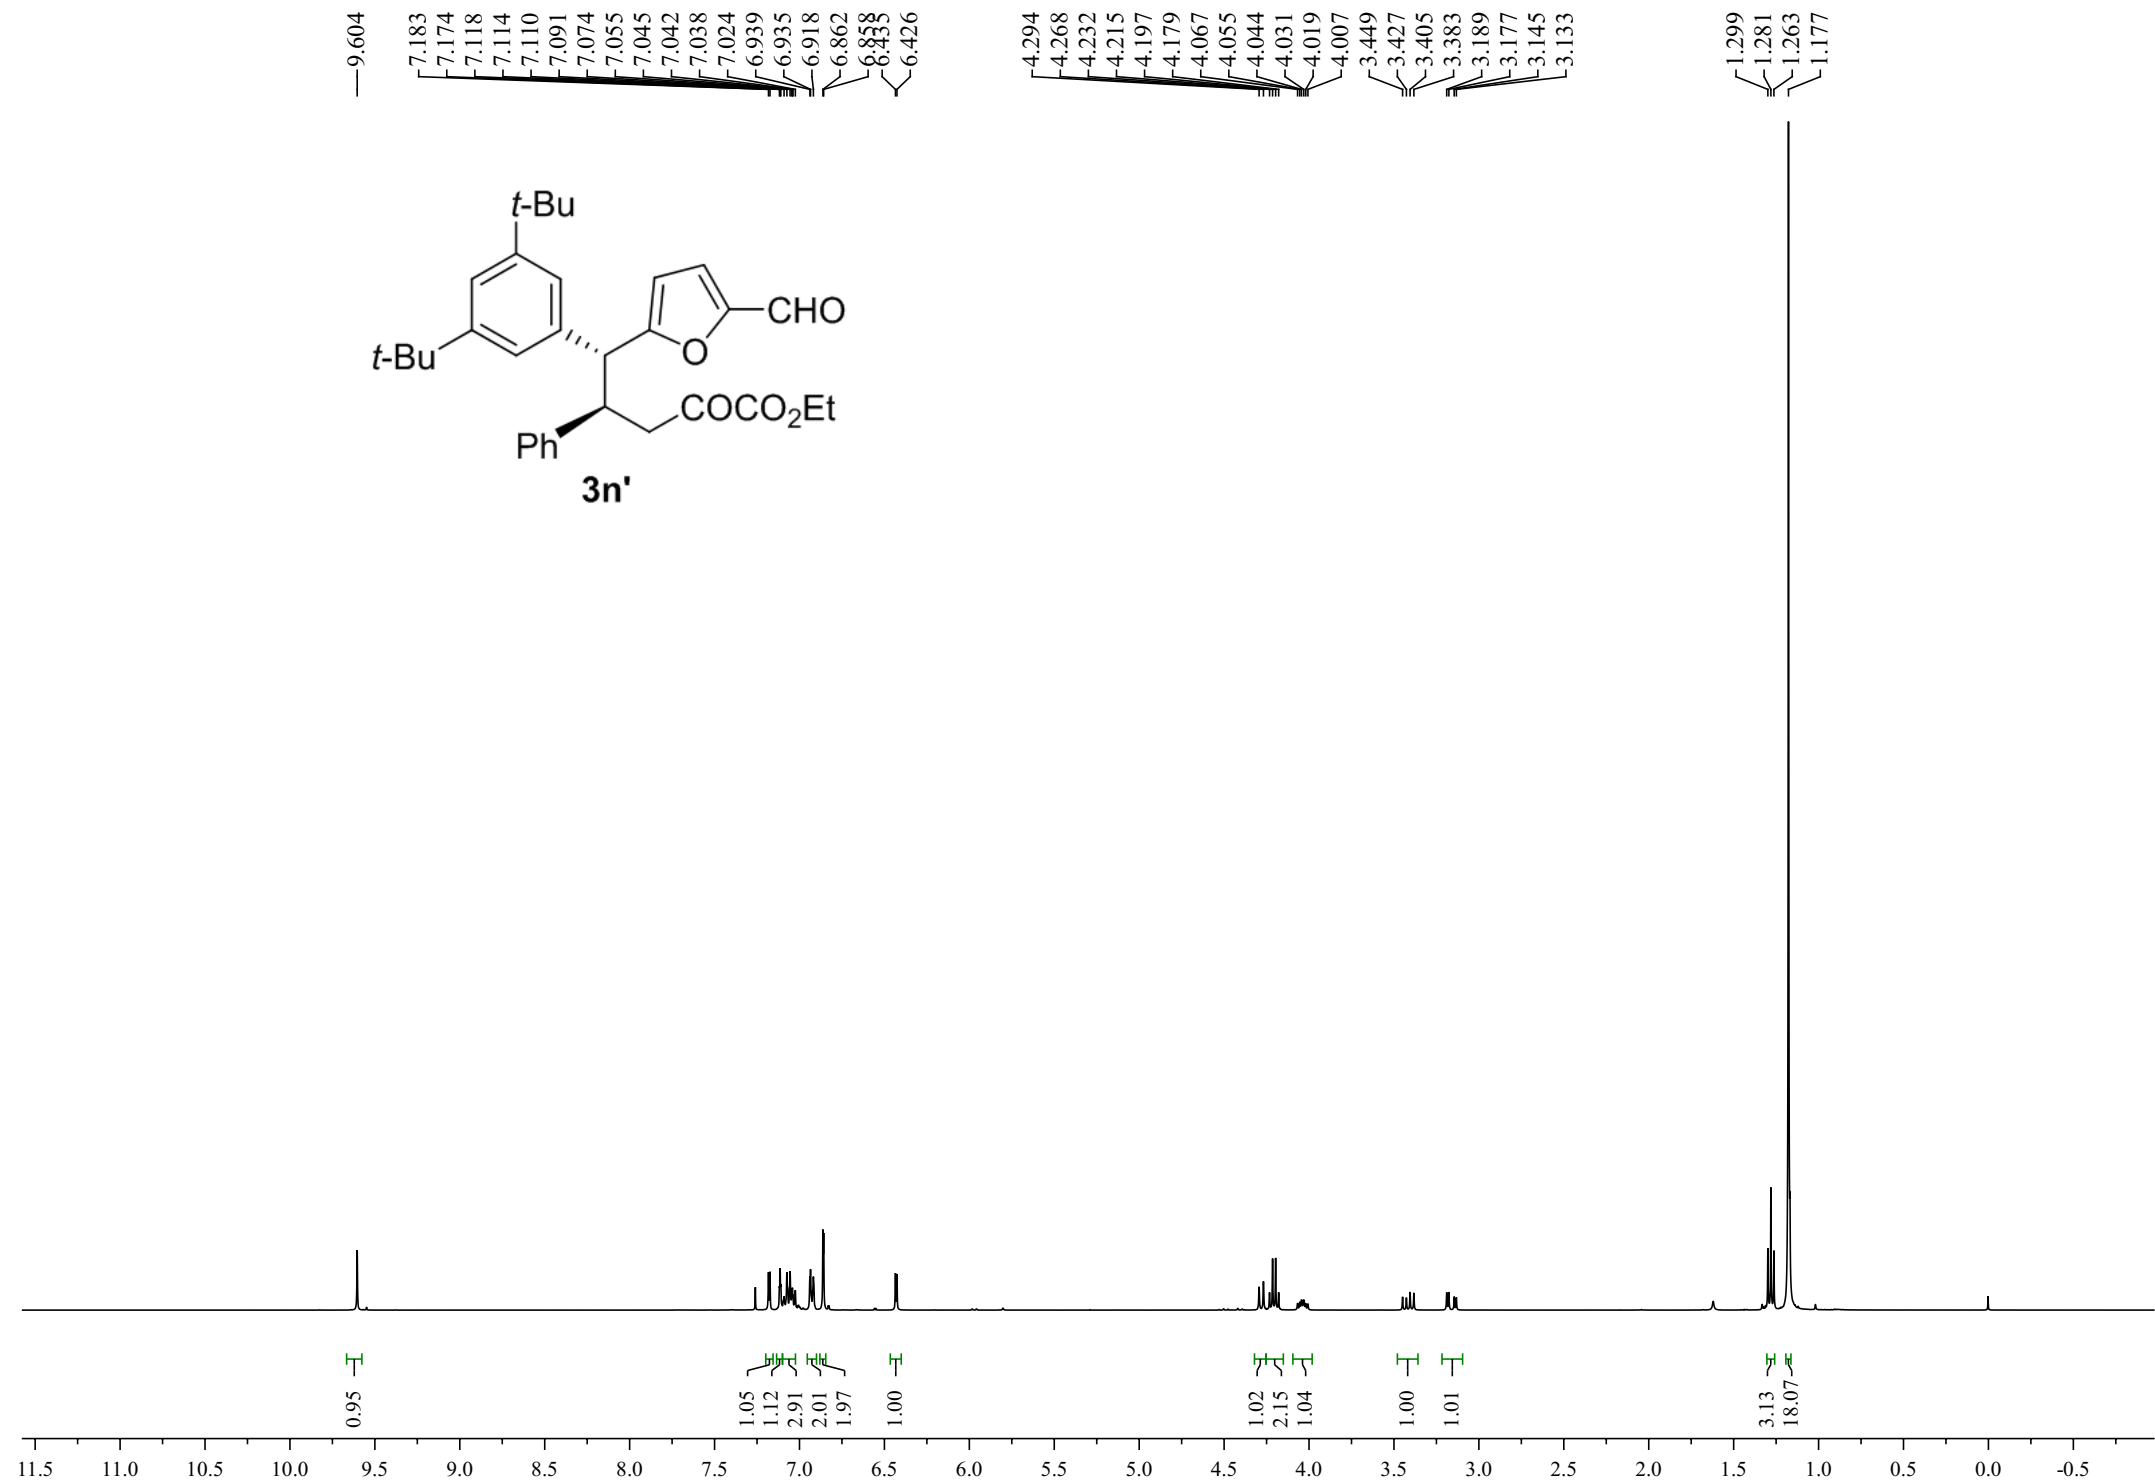

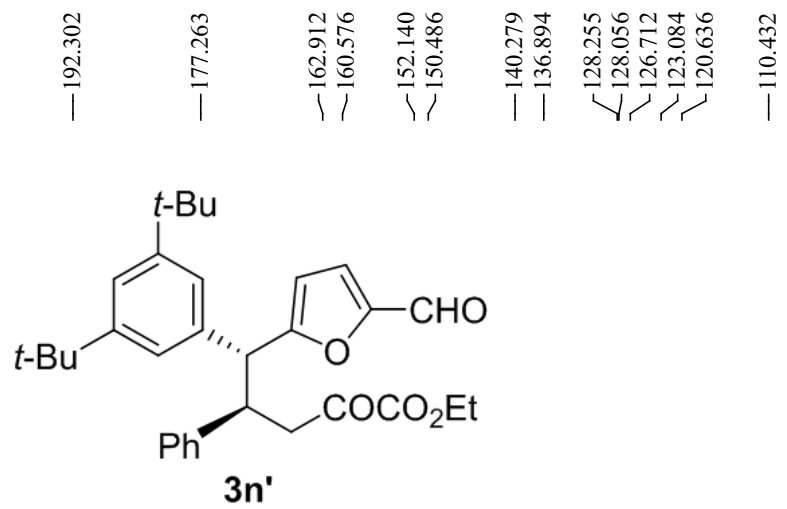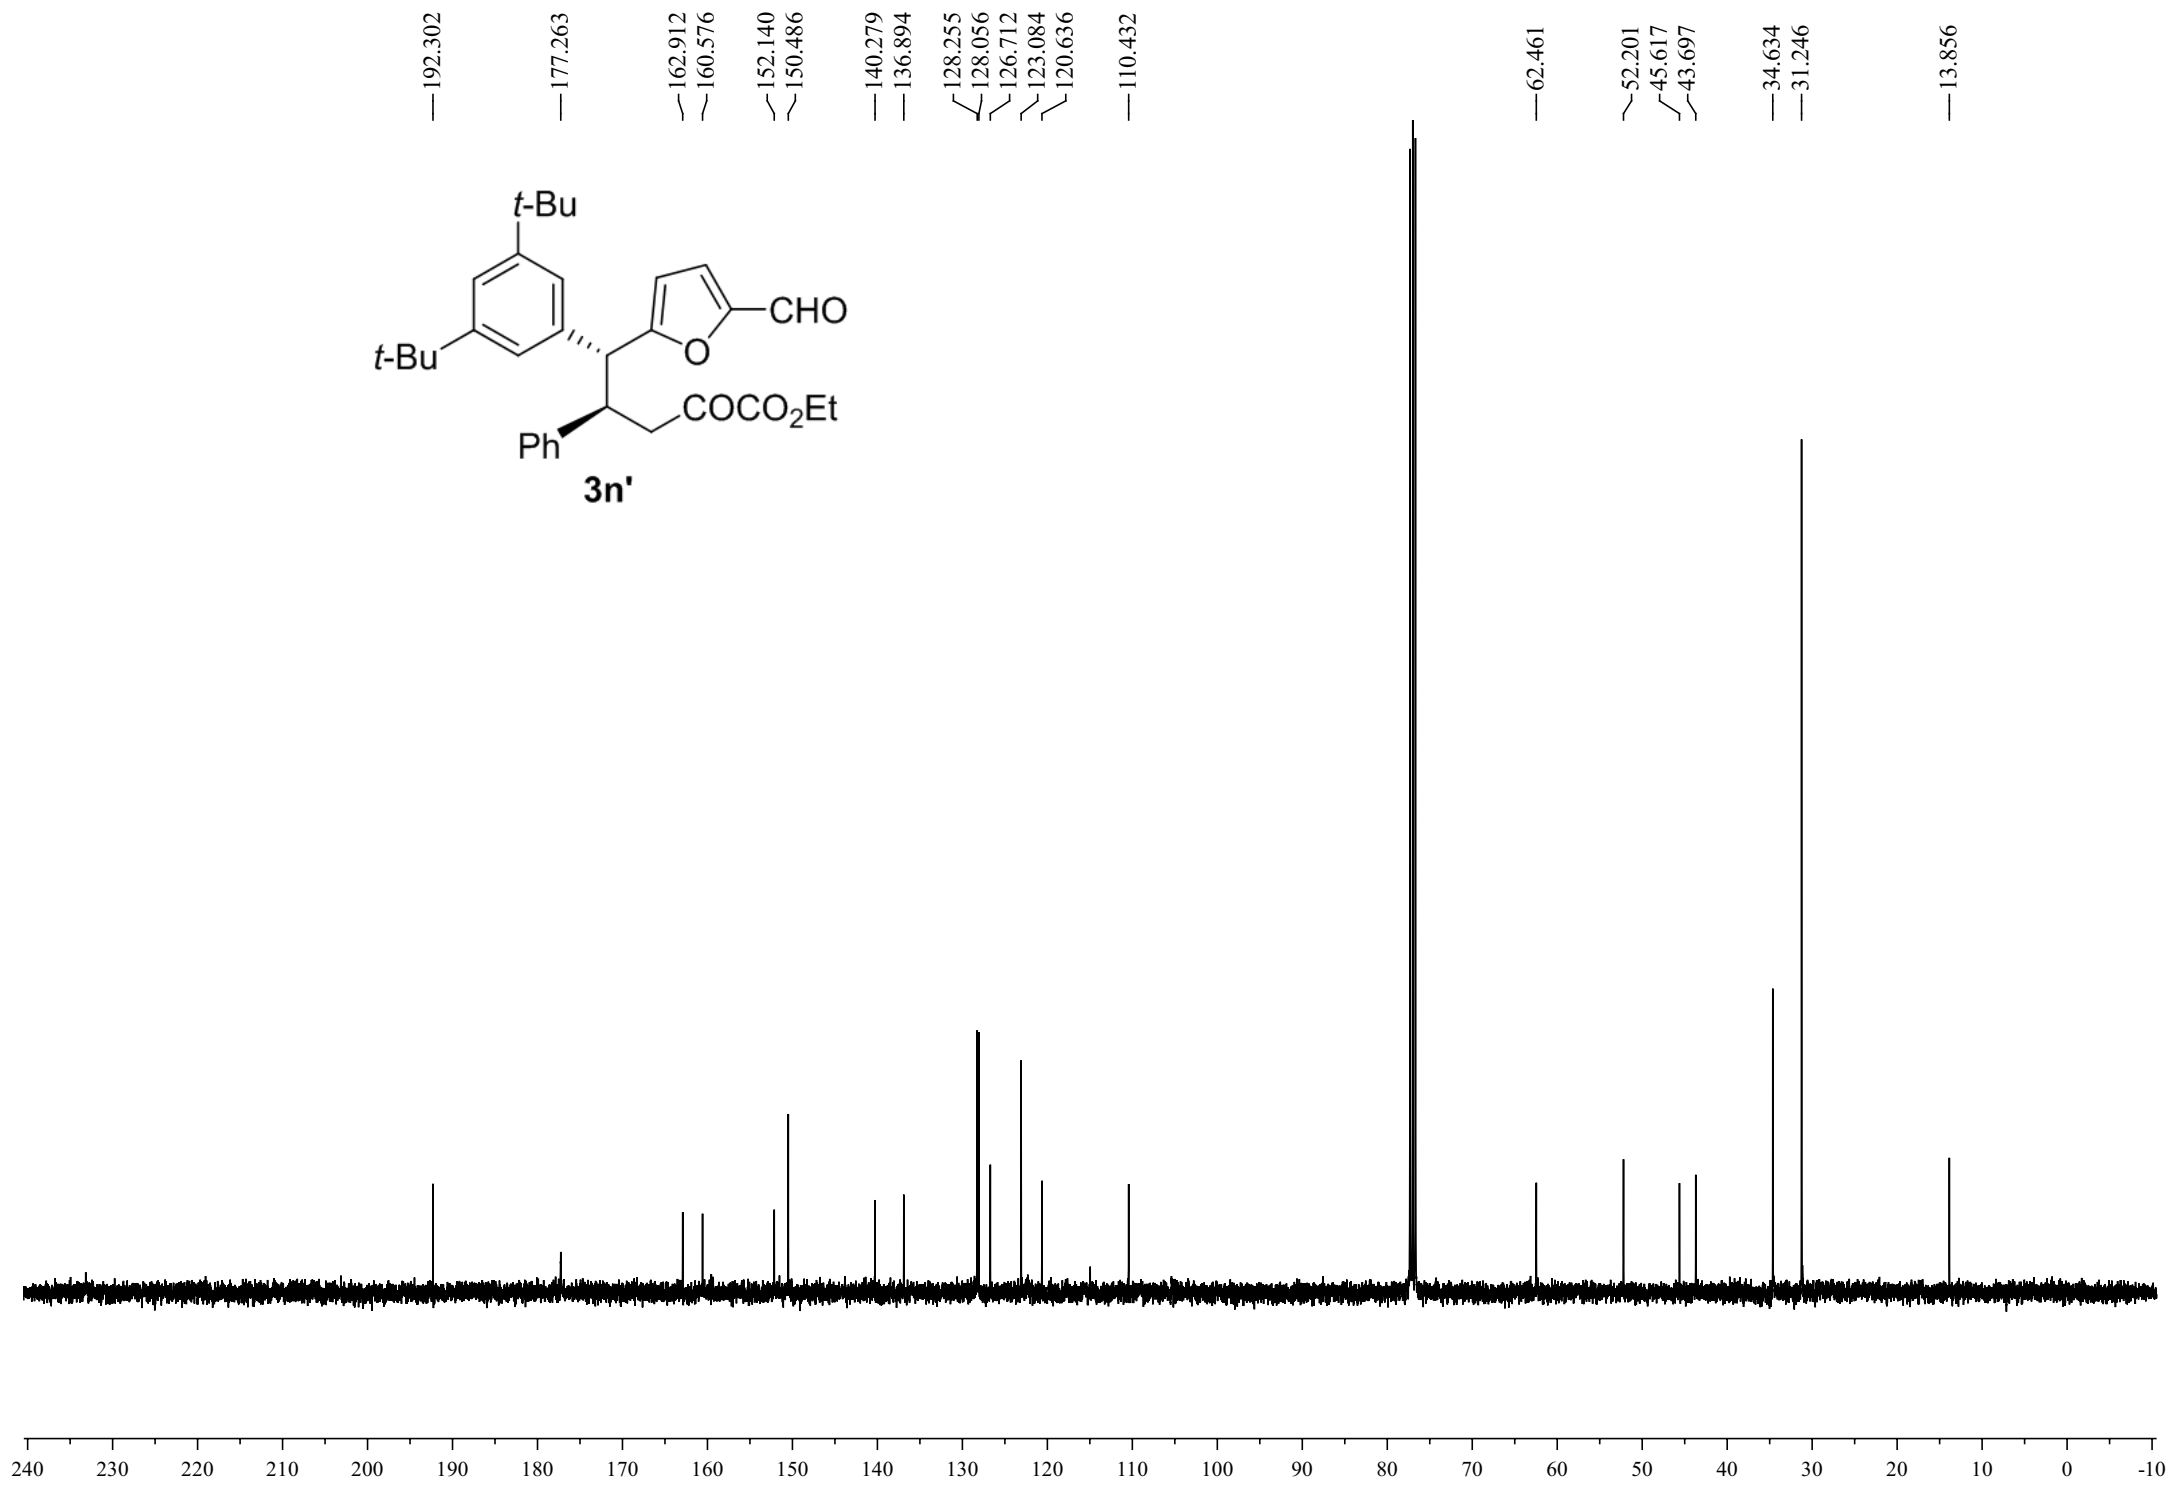

9.424  
 7.879  
 7.869  
 7.848  
 7.614  
 7.609  
 7.514  
 7.502  
 7.496  
 7.479  
 7.294  
 7.290  
 7.272  
 7.241  
 7.223  
 7.204  
 7.145  
 6.933  
 6.924  
 6.149  
 6.140  
 4.509  
 4.480  
 4.286  
 4.273  
 4.262  
 4.257  
 4.049  
 4.040  
 4.031  
 4.012  
 3.994  
 3.984  
 3.976  
 3.369  
 3.285  
 3.265  
 3.241  
 3.024  
 3.013  
 2.980  
 2.969  
 1.158  
 1.141  
 1.123

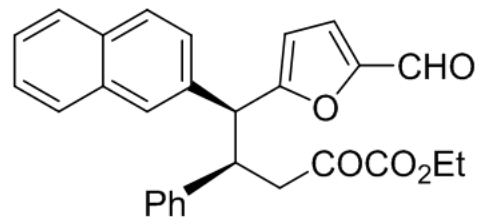

**3o**

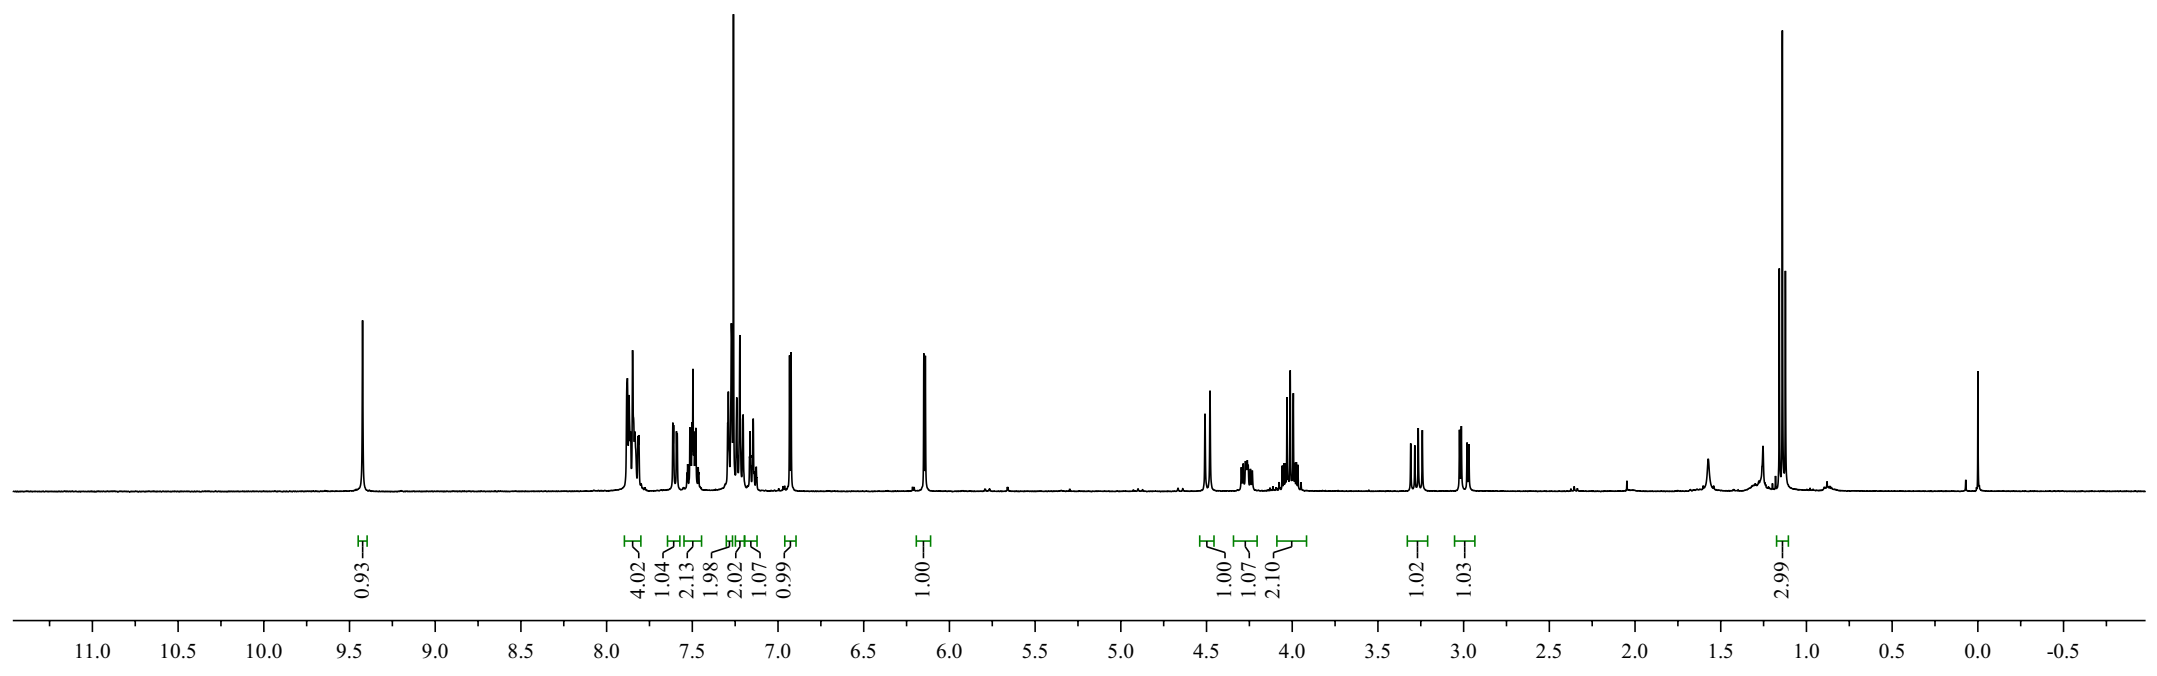

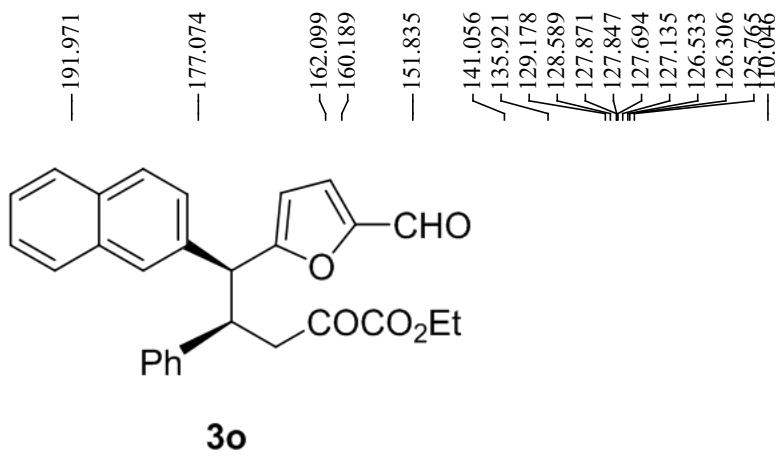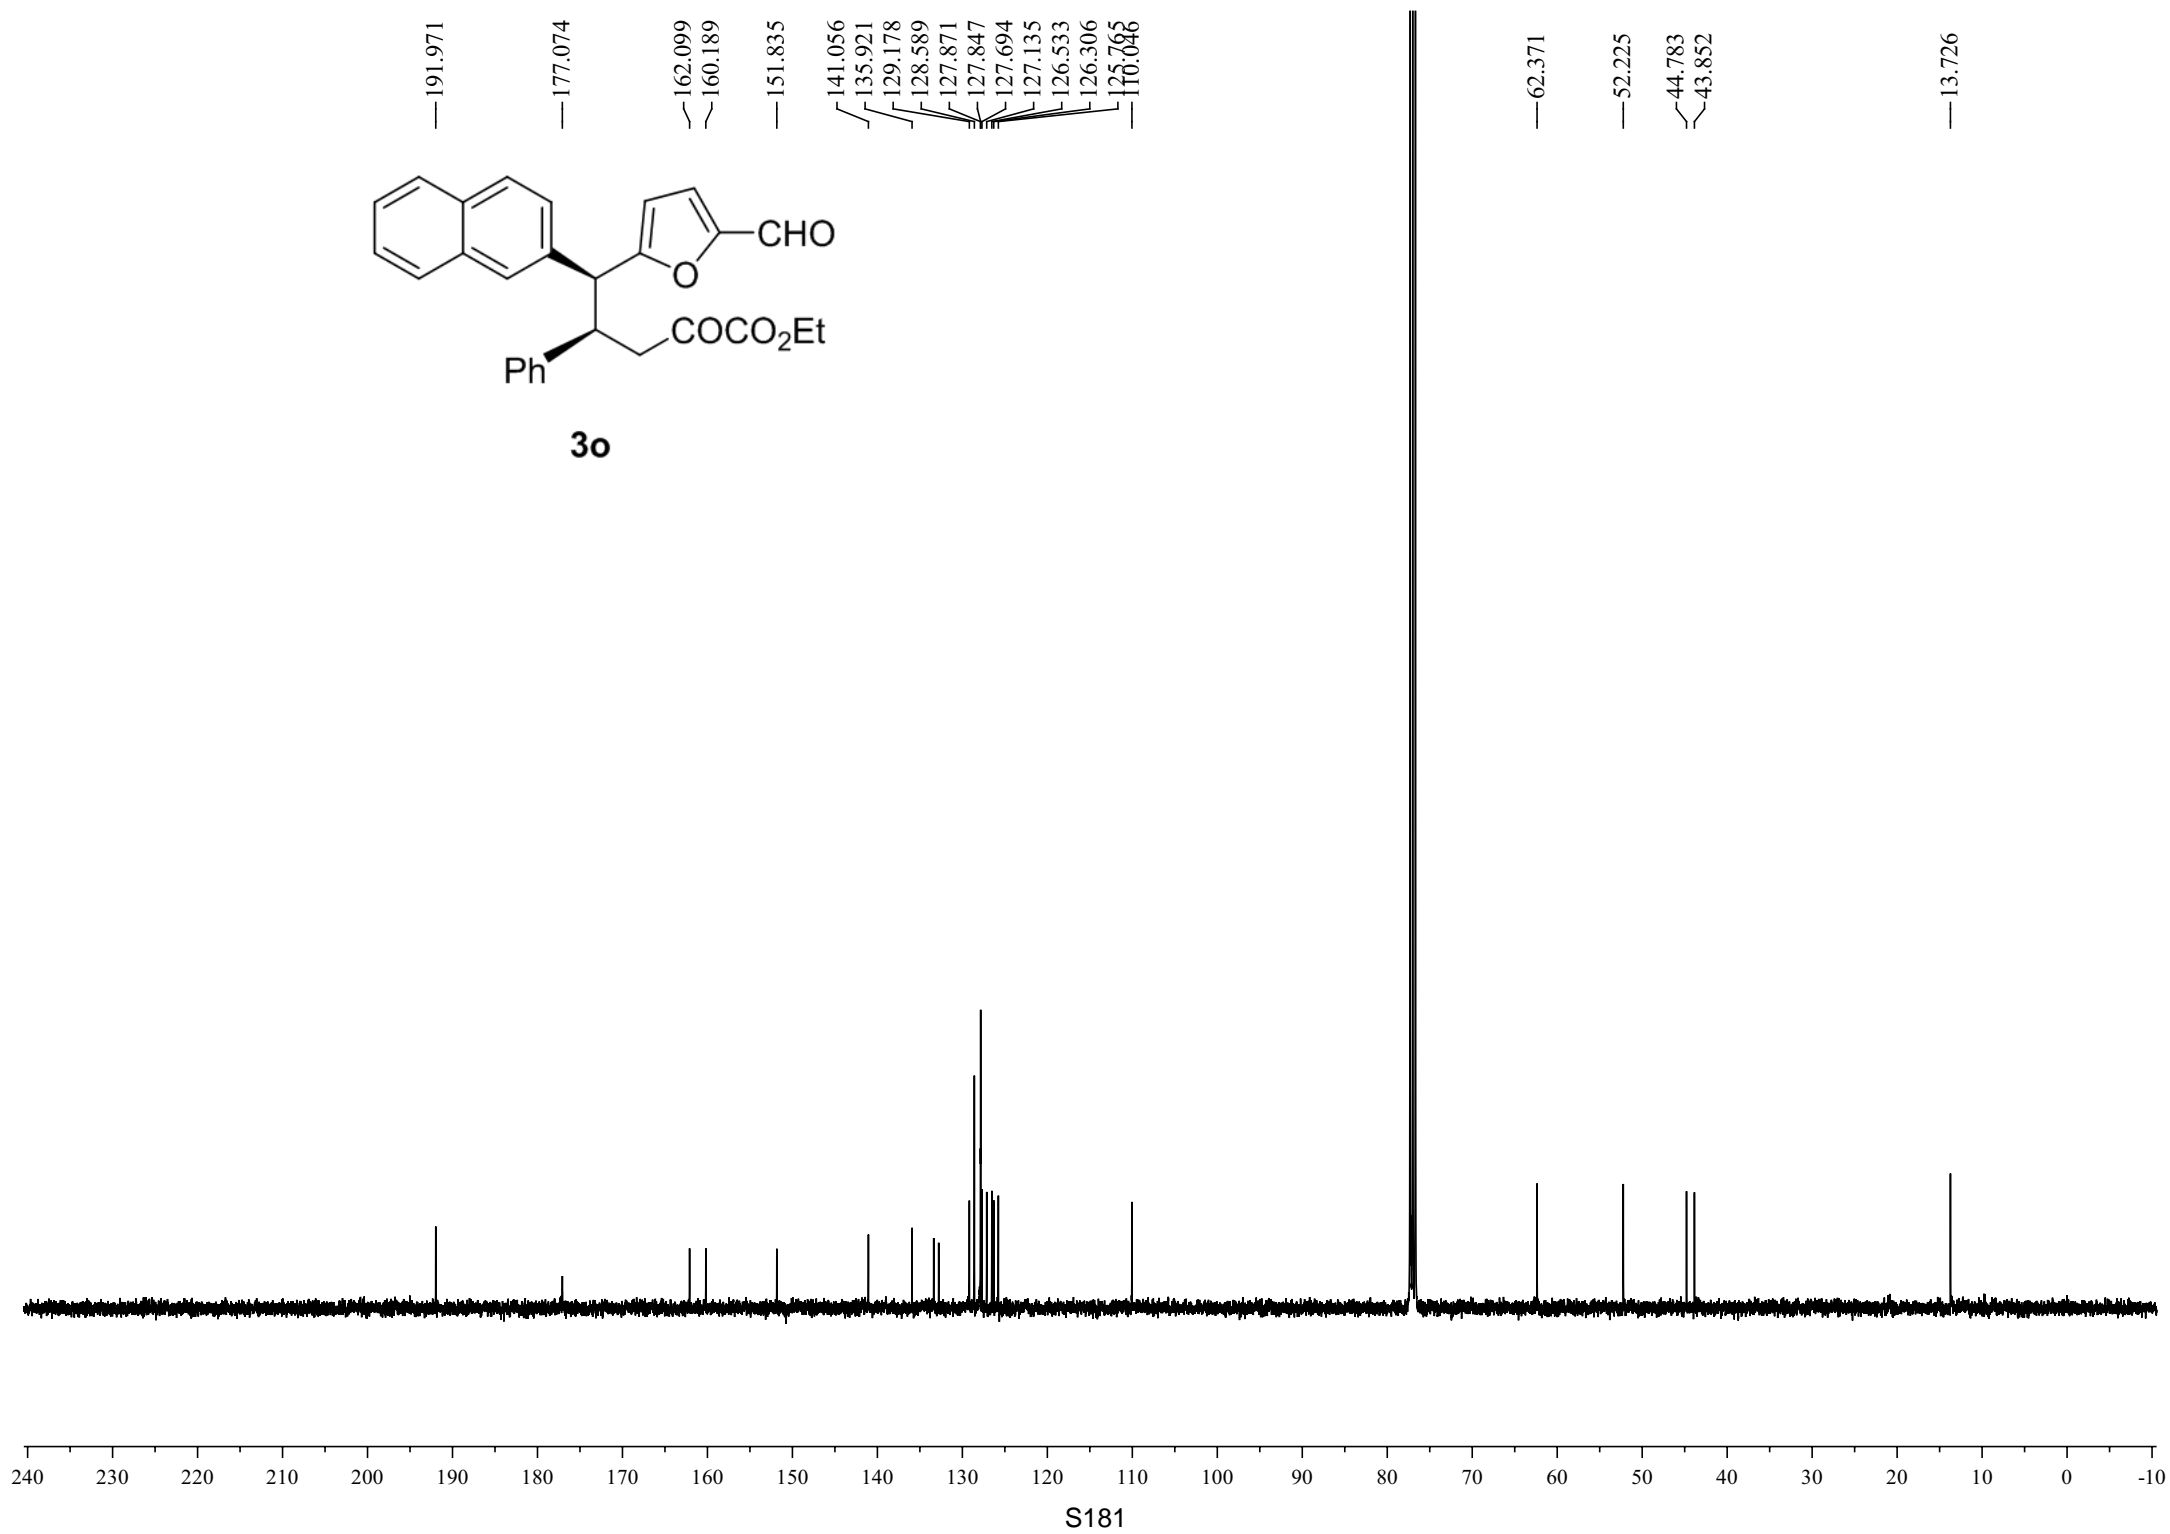

9.589  
7.691  
7.659  
7.637  
7.555  
7.407  
7.403  
7.394  
7.384  
7.380  
7.340  
7.335  
7.318  
7.314  
7.171  
7.162  
7.088  
7.077  
6.457  
6.448

4.555  
4.528  
4.290  
4.280  
4.275  
4.268  
4.263  
4.240  
4.229  
4.212  
4.210  
4.194  
4.192  
4.176  
3.445  
3.423  
3.401  
3.251  
3.238  
3.207  
3.194

1.296  
1.278  
1.260

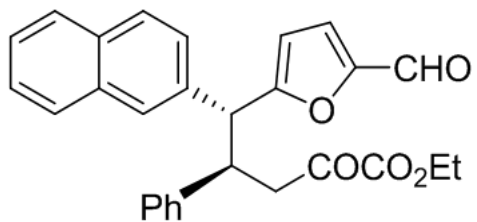

3o'

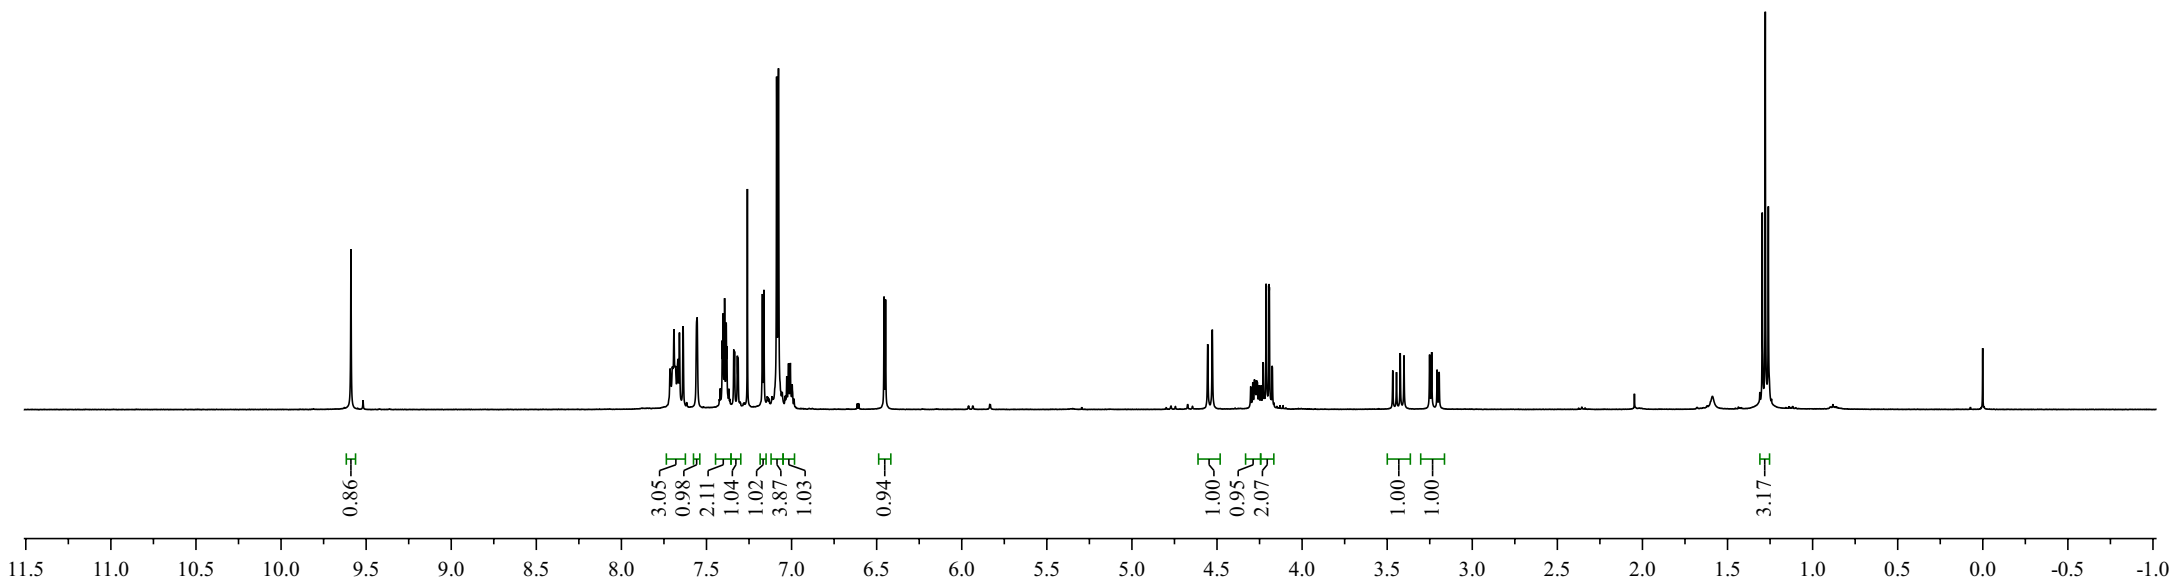

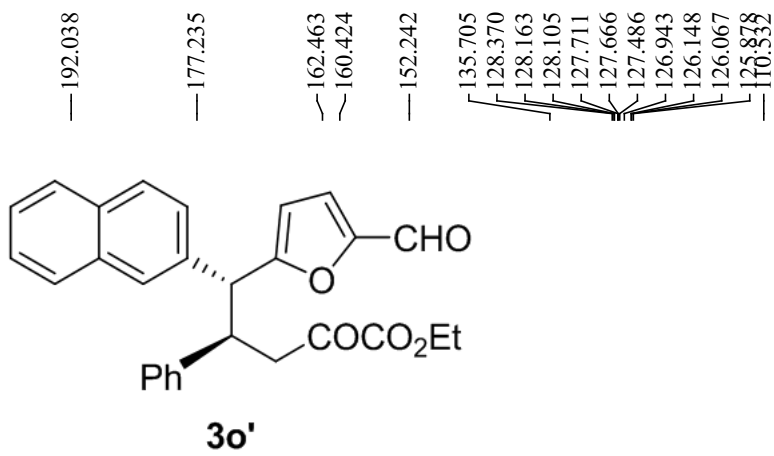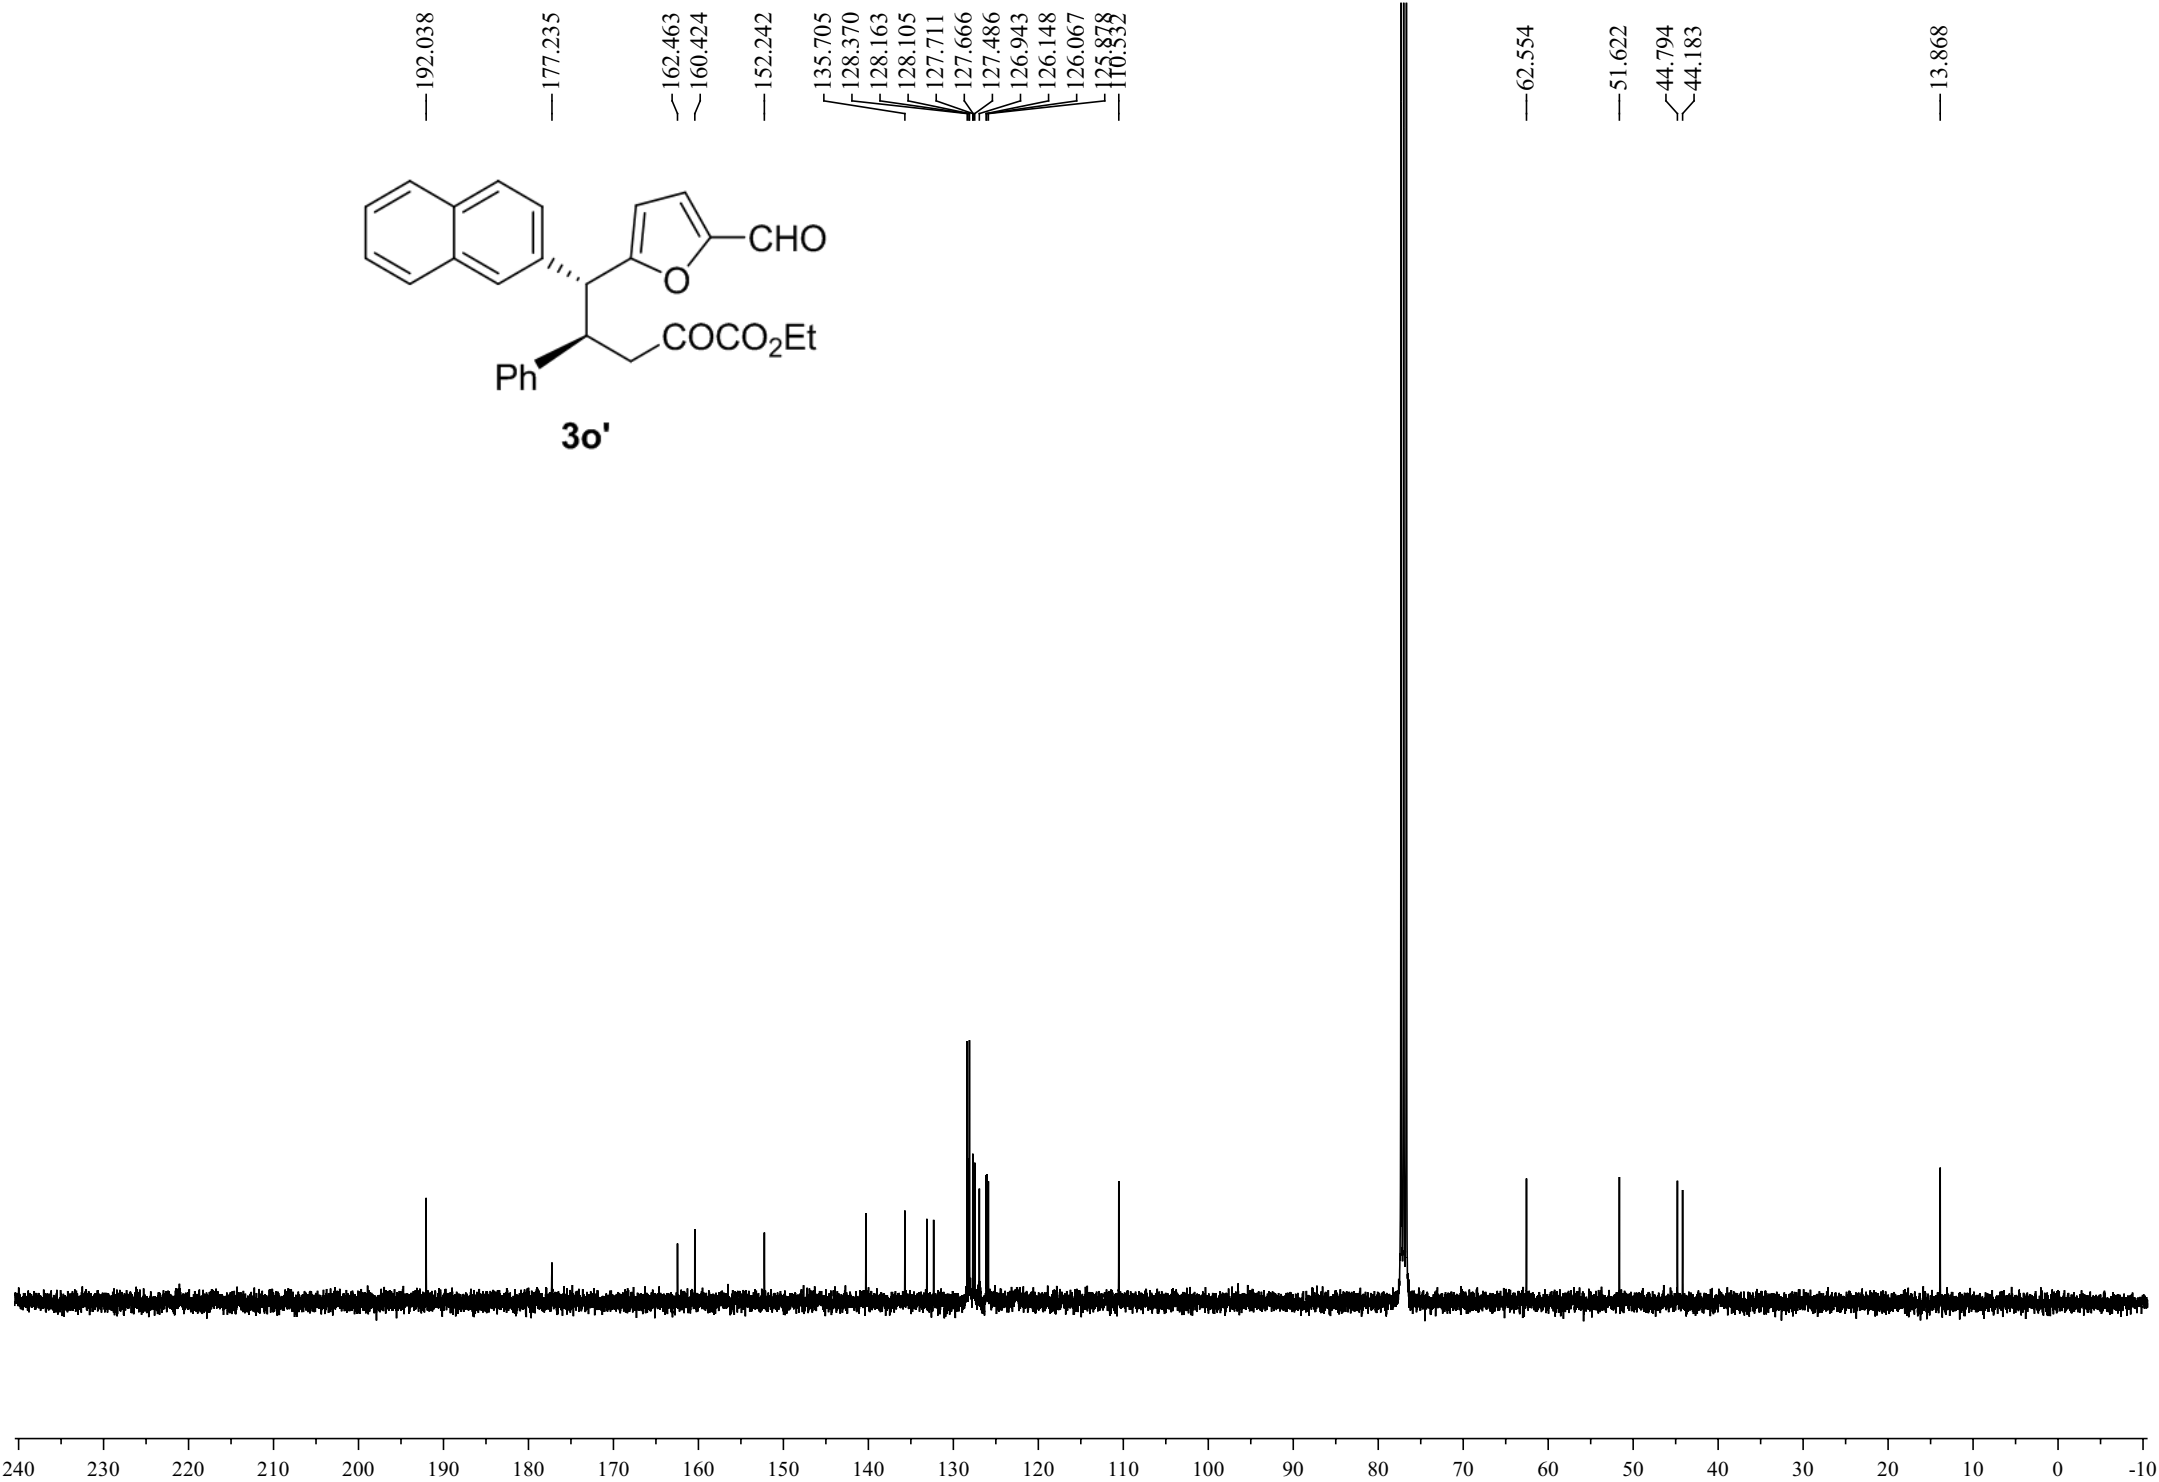

9.330  
7.548  
7.545  
7.527  
7.398  
7.379  
7.371  
7.368  
7.360  
7.350  
7.274  
7.223  
7.214  
7.201  
7.183  
7.163  
6.589  
6.493

4.617  
4.588  
4.034  
4.016  
4.008  
3.989  
3.601  
3.342  
3.298  
2.845  
2.845  
2.836  
2.801  
2.792

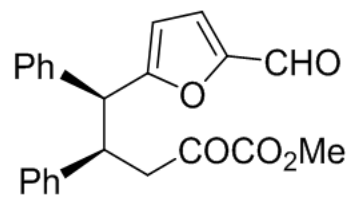

4a

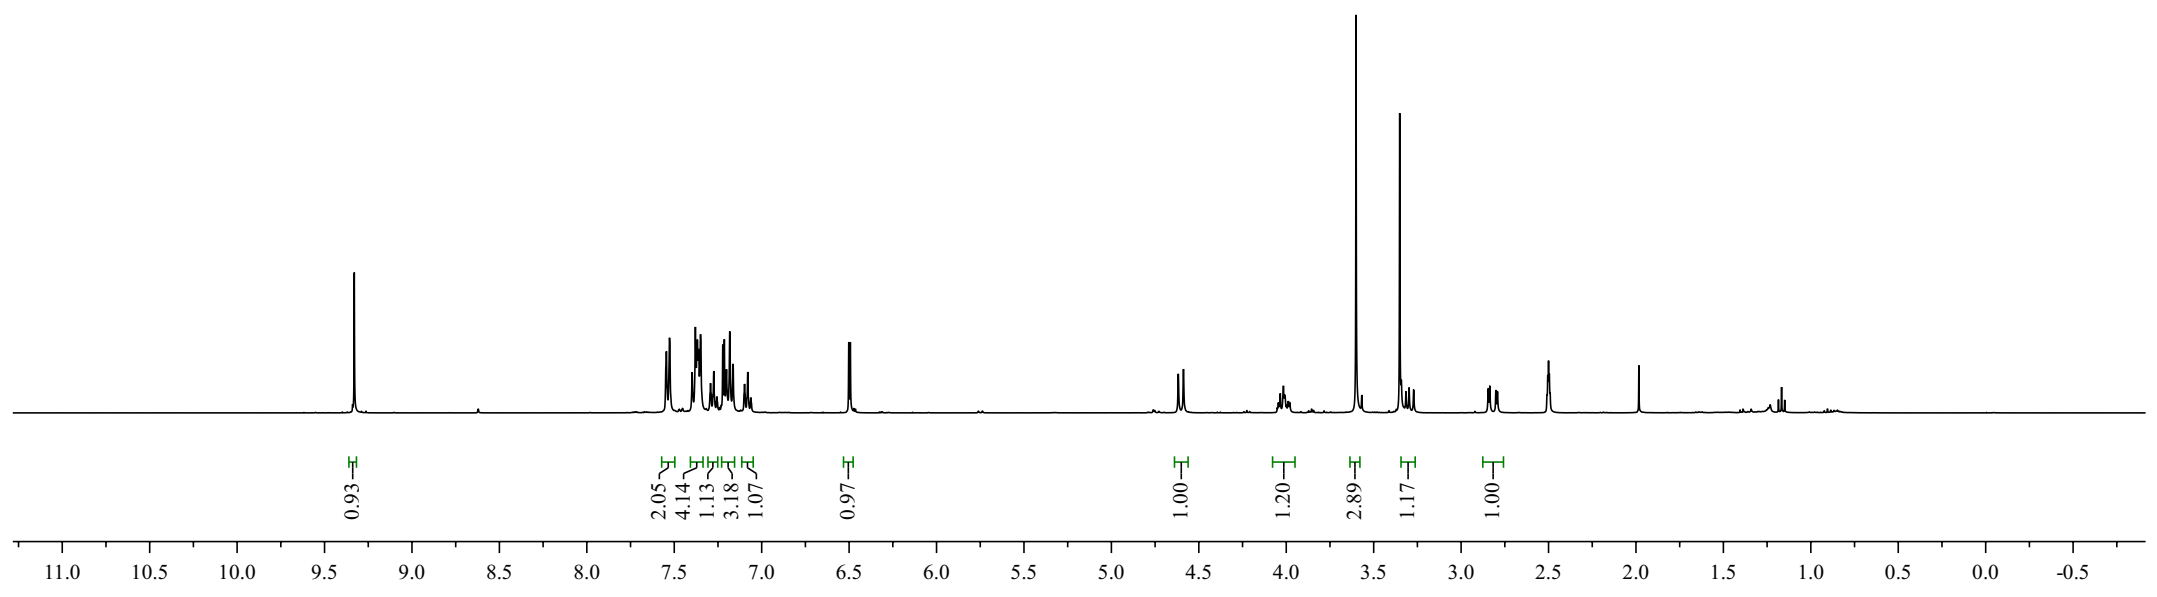



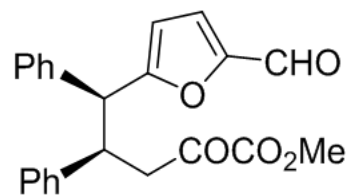

4a

— 191.743  
— 177.351  
— 162.741  
— 160.306  
— 151.026  
— 141.803  
— 139.535  
— 128.872  
— 128.475  
— 128.083  
— 128.032  
— 127.406  
— 126.560  
— 110.001  
— 52.462  
— 50.423  
— 44.136  
— 43.493

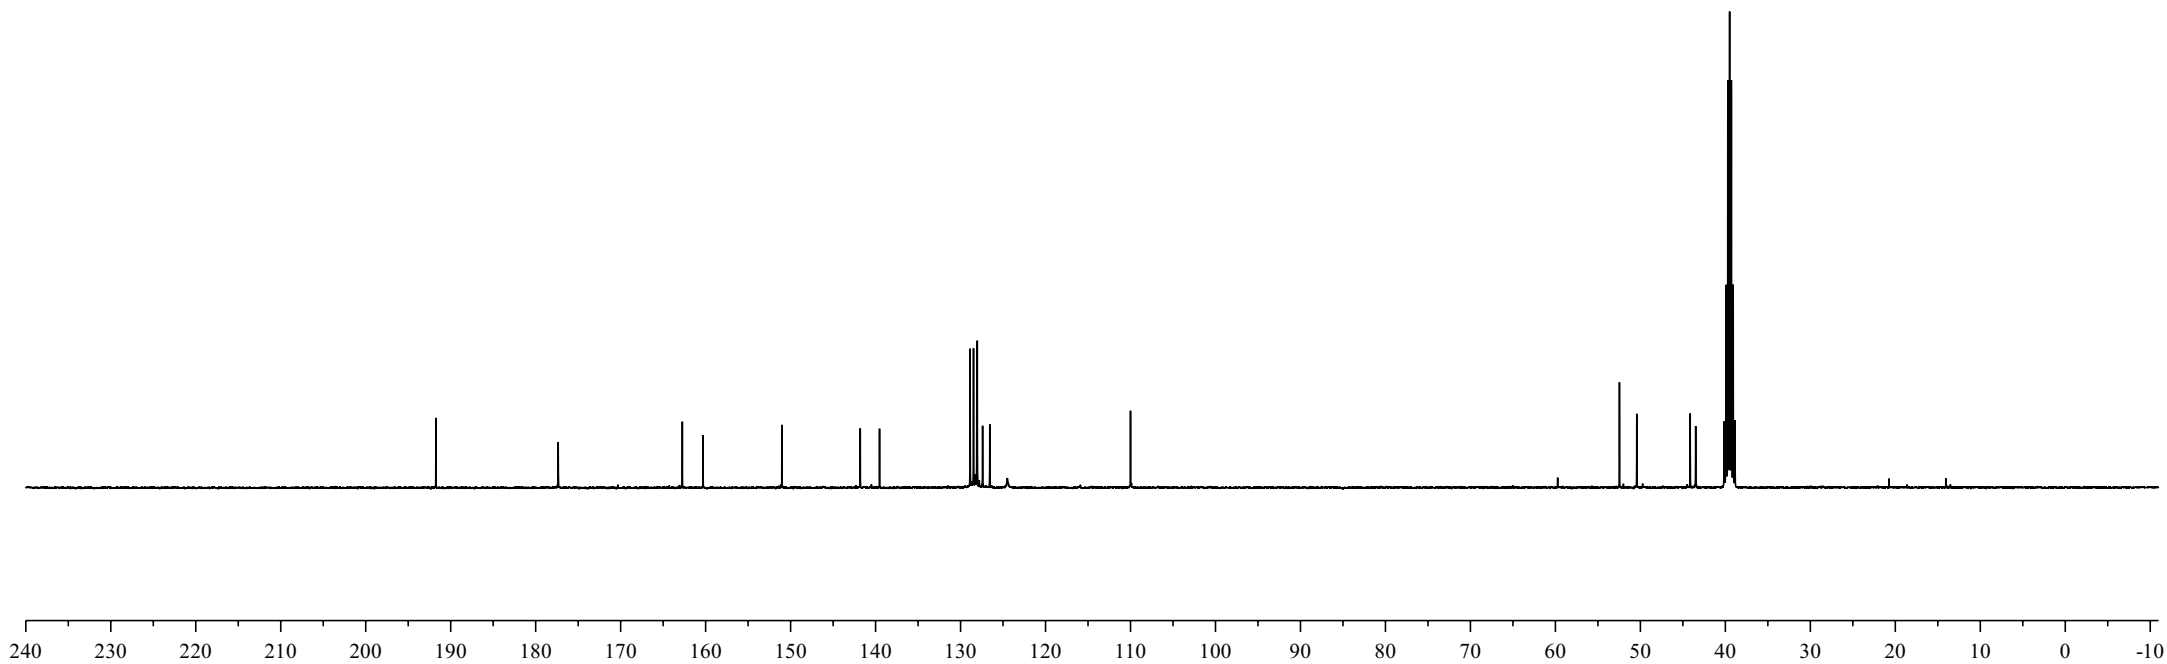

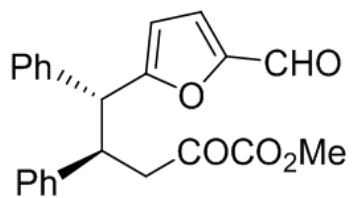

4a'

9.510  
7.484  
7.475  
7.215  
7.212  
7.194  
7.192  
7.173  
7.128  
7.109  
7.089  
7.070  
7.040  
7.021  
7.016  
7.014  
7.003  
7.000  
6.995  
6.977  
6.752  
6.743

4.650  
4.621  
4.046  
4.032  
4.017  
4.004  
3.656  
3.427  
3.403  
3.383  
3.358  
3.110  
3.100  
3.066  
3.056

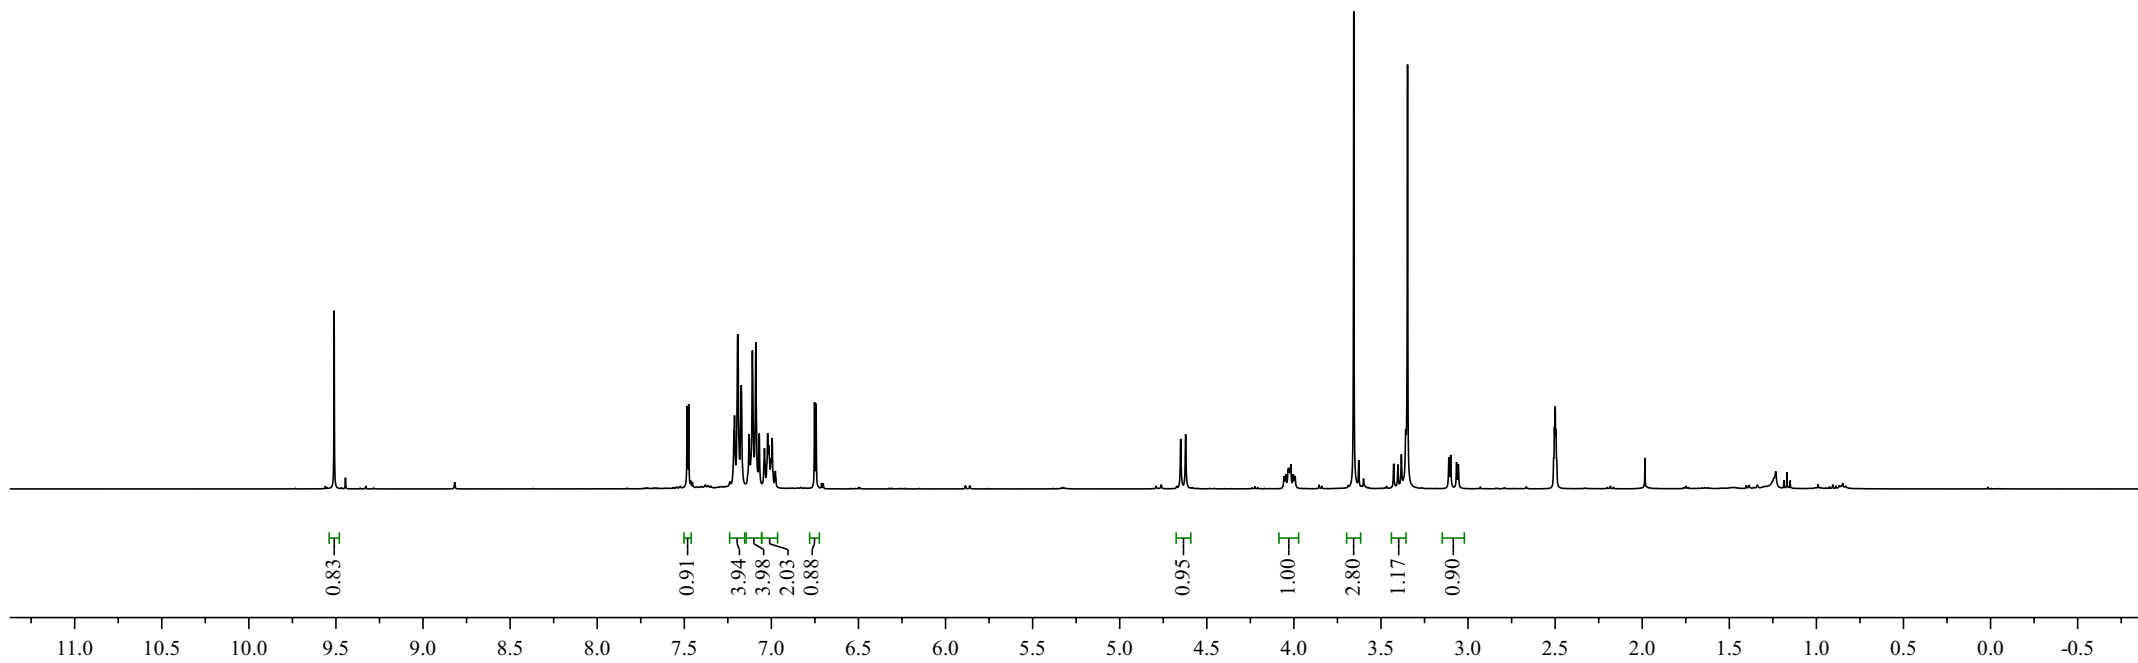

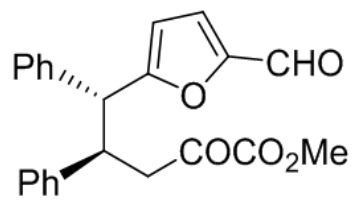

4a'

— 191.412

— 177.675

— 162.659

— 160.377

— 151.797

— 141.156

— 139.166

— 128.443

— 128.323

— 128.142

— 127.865

— 126.590

— 126.315

— 110.428

— 52.541

— 49.993

— 44.113

— 44.053

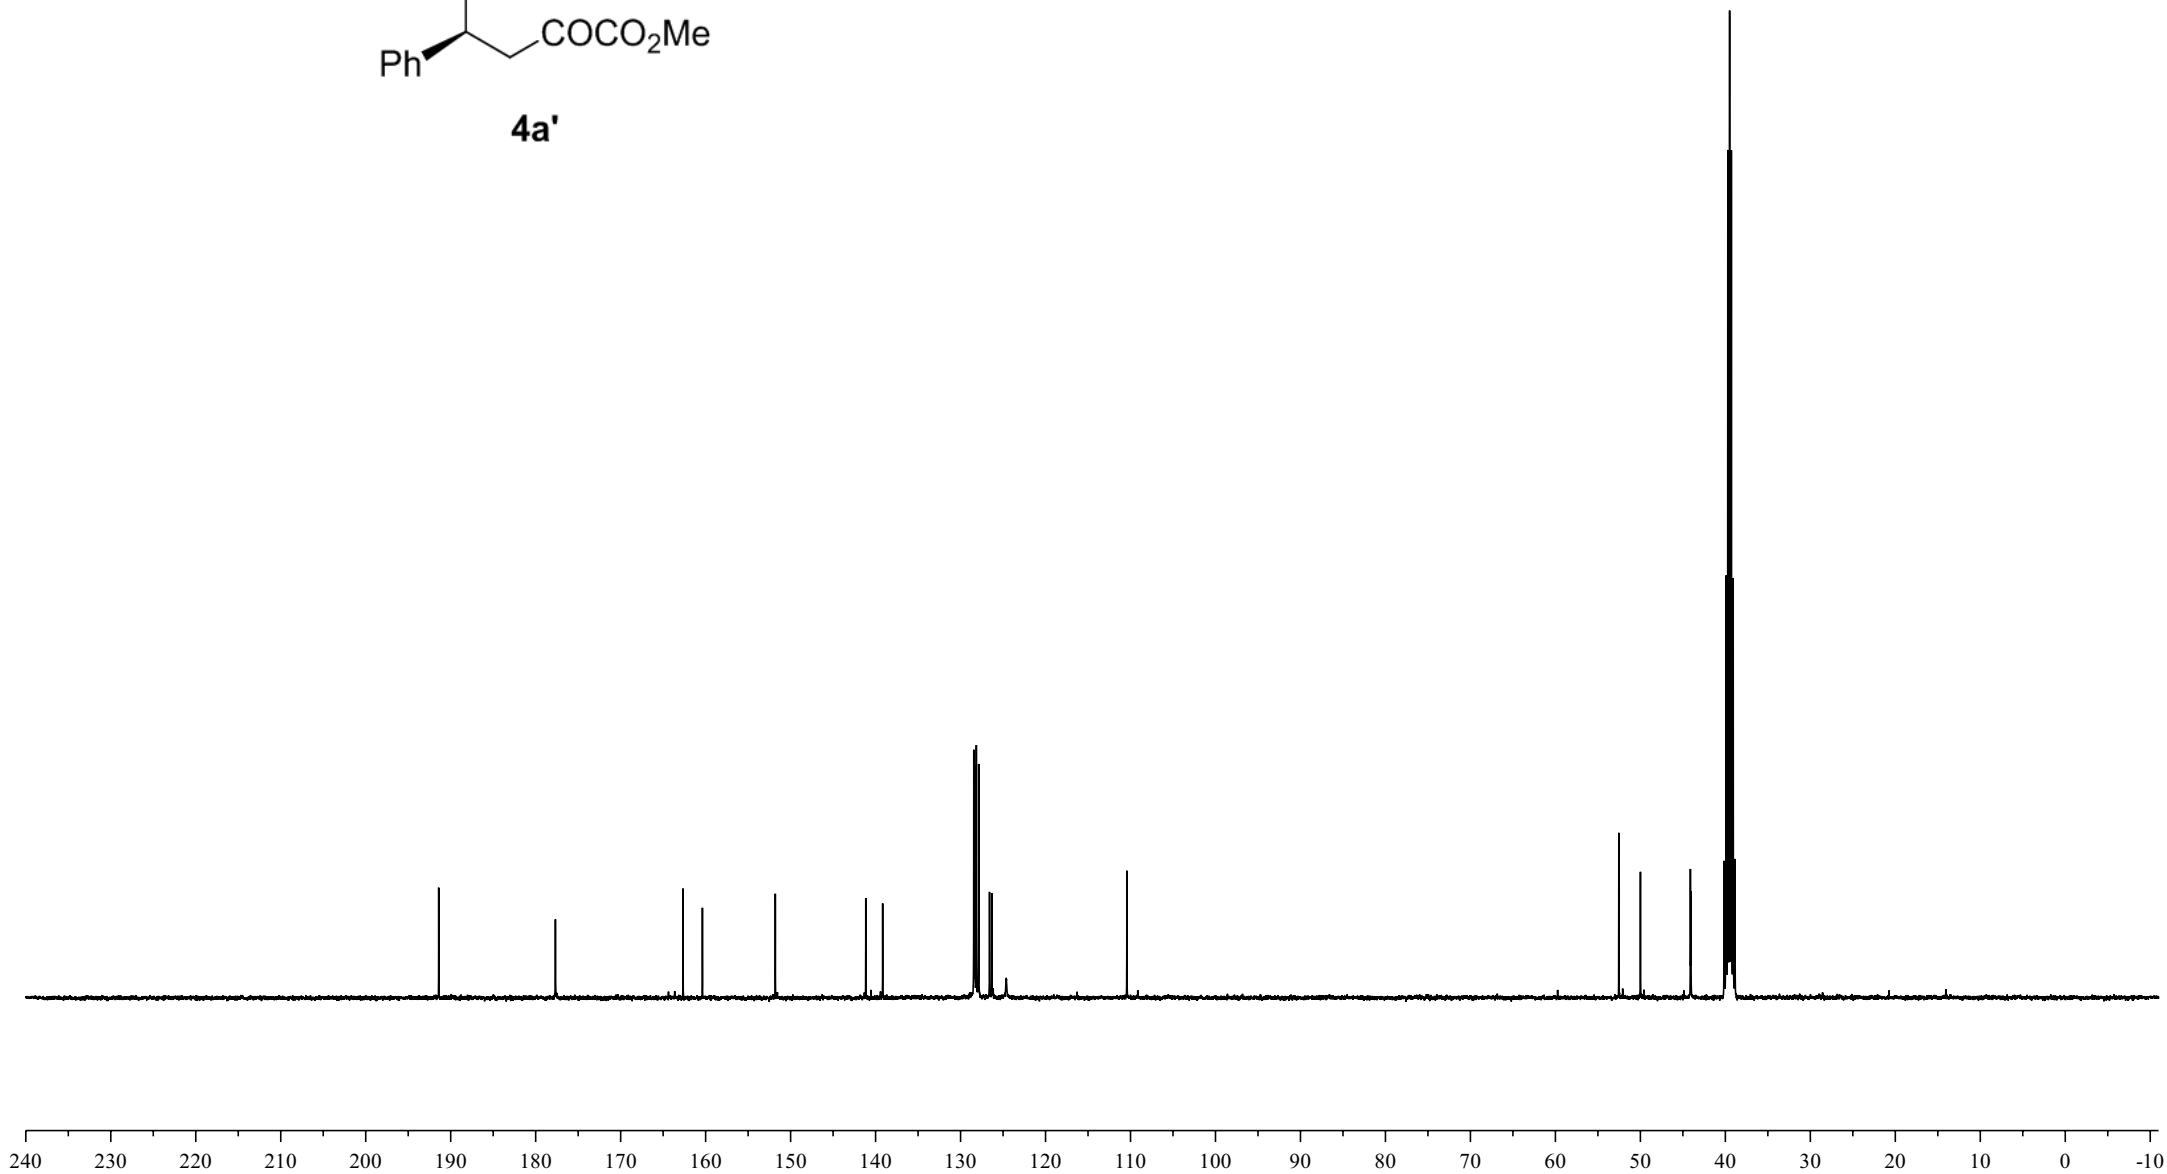

7.547  
7.535  
7.391  
7.379  
7.366  
7.358  
7.346  
7.288  
7.275  
7.263  
7.217  
7.211  
7.199  
7.186  
7.173  
7.097  
7.085  
7.073  
6.490  
6.484

4.849  
4.839  
4.828  
4.818  
4.808  
4.621  
4.602  
4.027  
4.015  
4.008  
3.996  
3.286  
3.258  
3.249  
2.811  
2.789  
2.782

1.138  
1.136  
1.128  
1.126

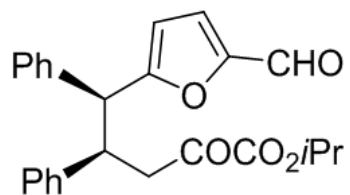

**4b**

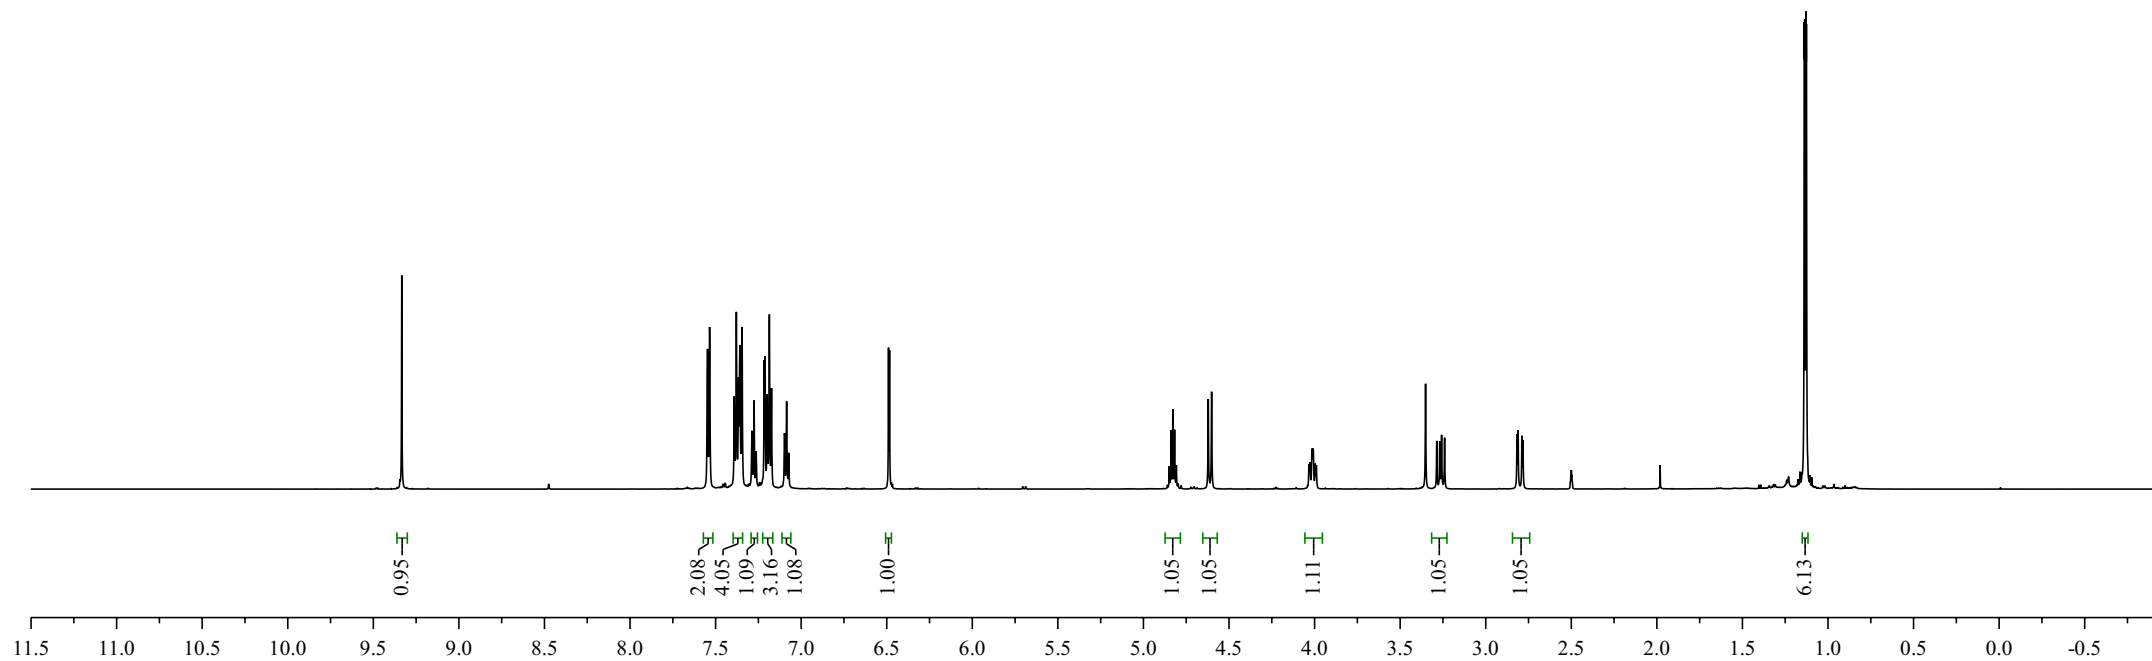

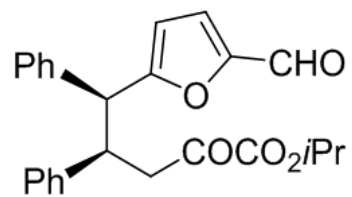

**4b**

— 192.557  
— 177.343  
— 162.672  
— 159.502  
— 151.053  
— 141.669  
— 139.529  
— 128.884  
— 128.456  
— 128.091  
— 128.055  
— 127.409  
— 126.620  
— 110.020  
— 69.807  
— 50.465  
— 44.455  
— 43.392  
— 21.168  
— 21.147

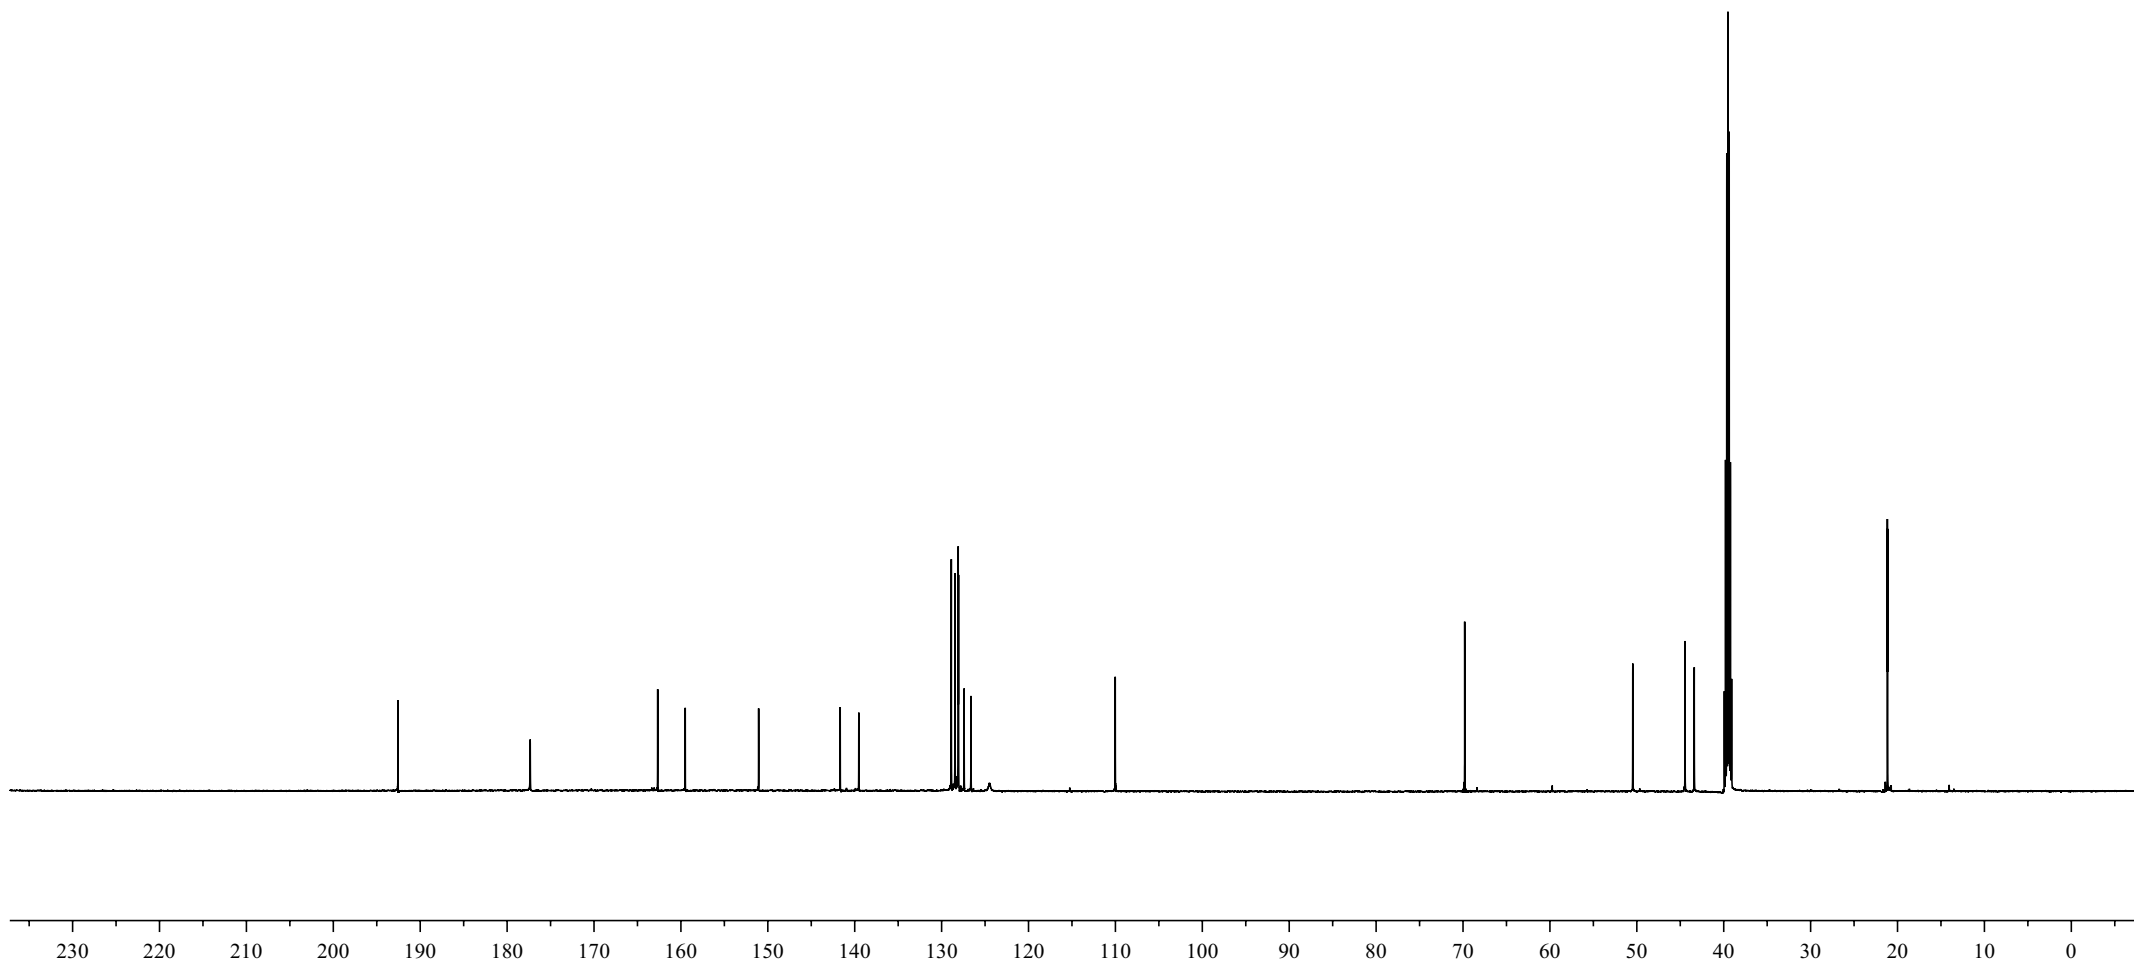

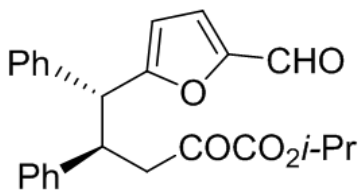

**4b'**

9.518

7.483  
7.477  
7.217  
7.205  
7.184  
7.172  
7.124  
7.111  
7.106  
7.098  
7.093  
7.081  
7.035  
7.023  
7.013  
7.001  
6.989  
6.756  
6.750

4.903  
4.892  
4.882  
4.871  
4.861  
4.659  
4.640

4.032  
4.025  
4.014  
3.987  
3.370  
3.358  
3.342  
3.073  
3.066  
3.044  
3.037

1.185  
1.179  
1.175  
1.169

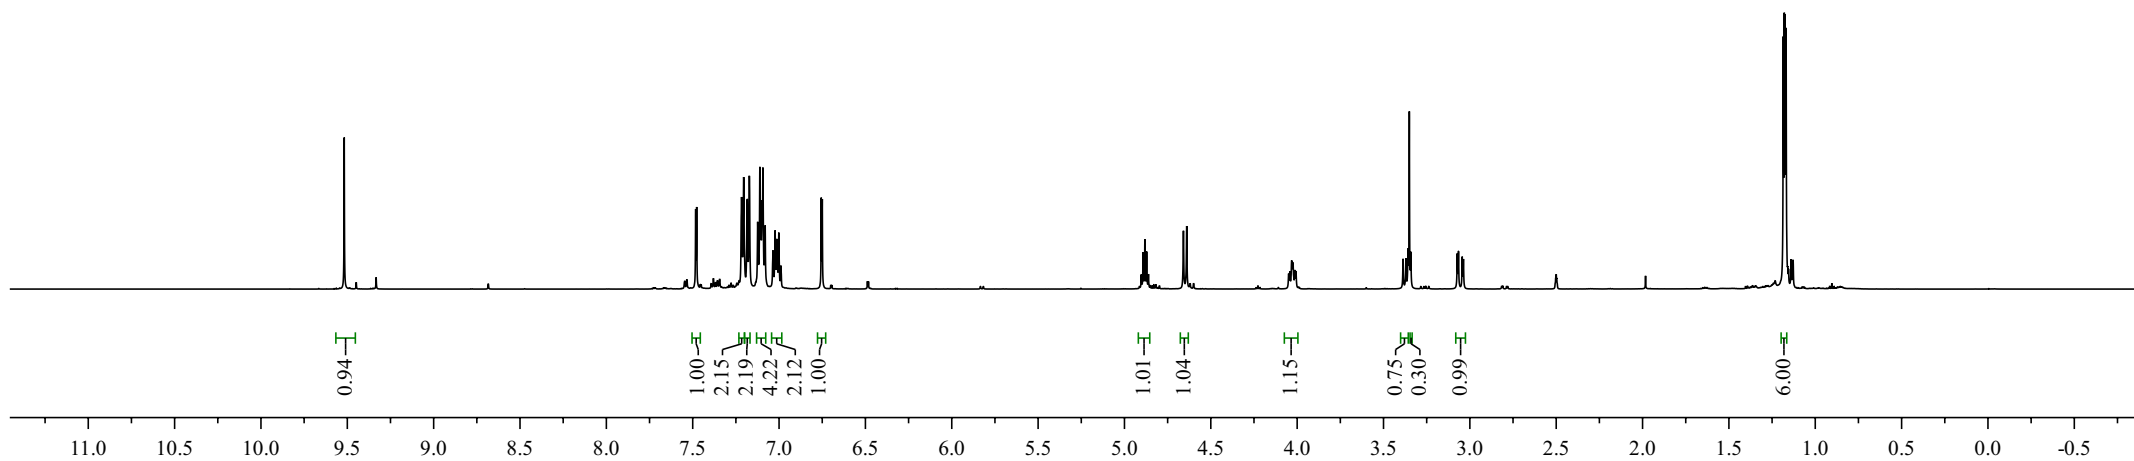

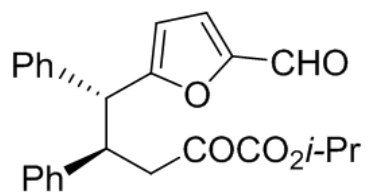

**4b'**

—192.223  
—177.643  
—162.604  
—159.523  
—151.823  
—141.023  
—139.132  
—128.431  
—128.293  
—128.147  
—127.910  
—126.590  
—126.362  
—110.440

—69.860

—50.019  
—44.440  
—43.898

—21.177

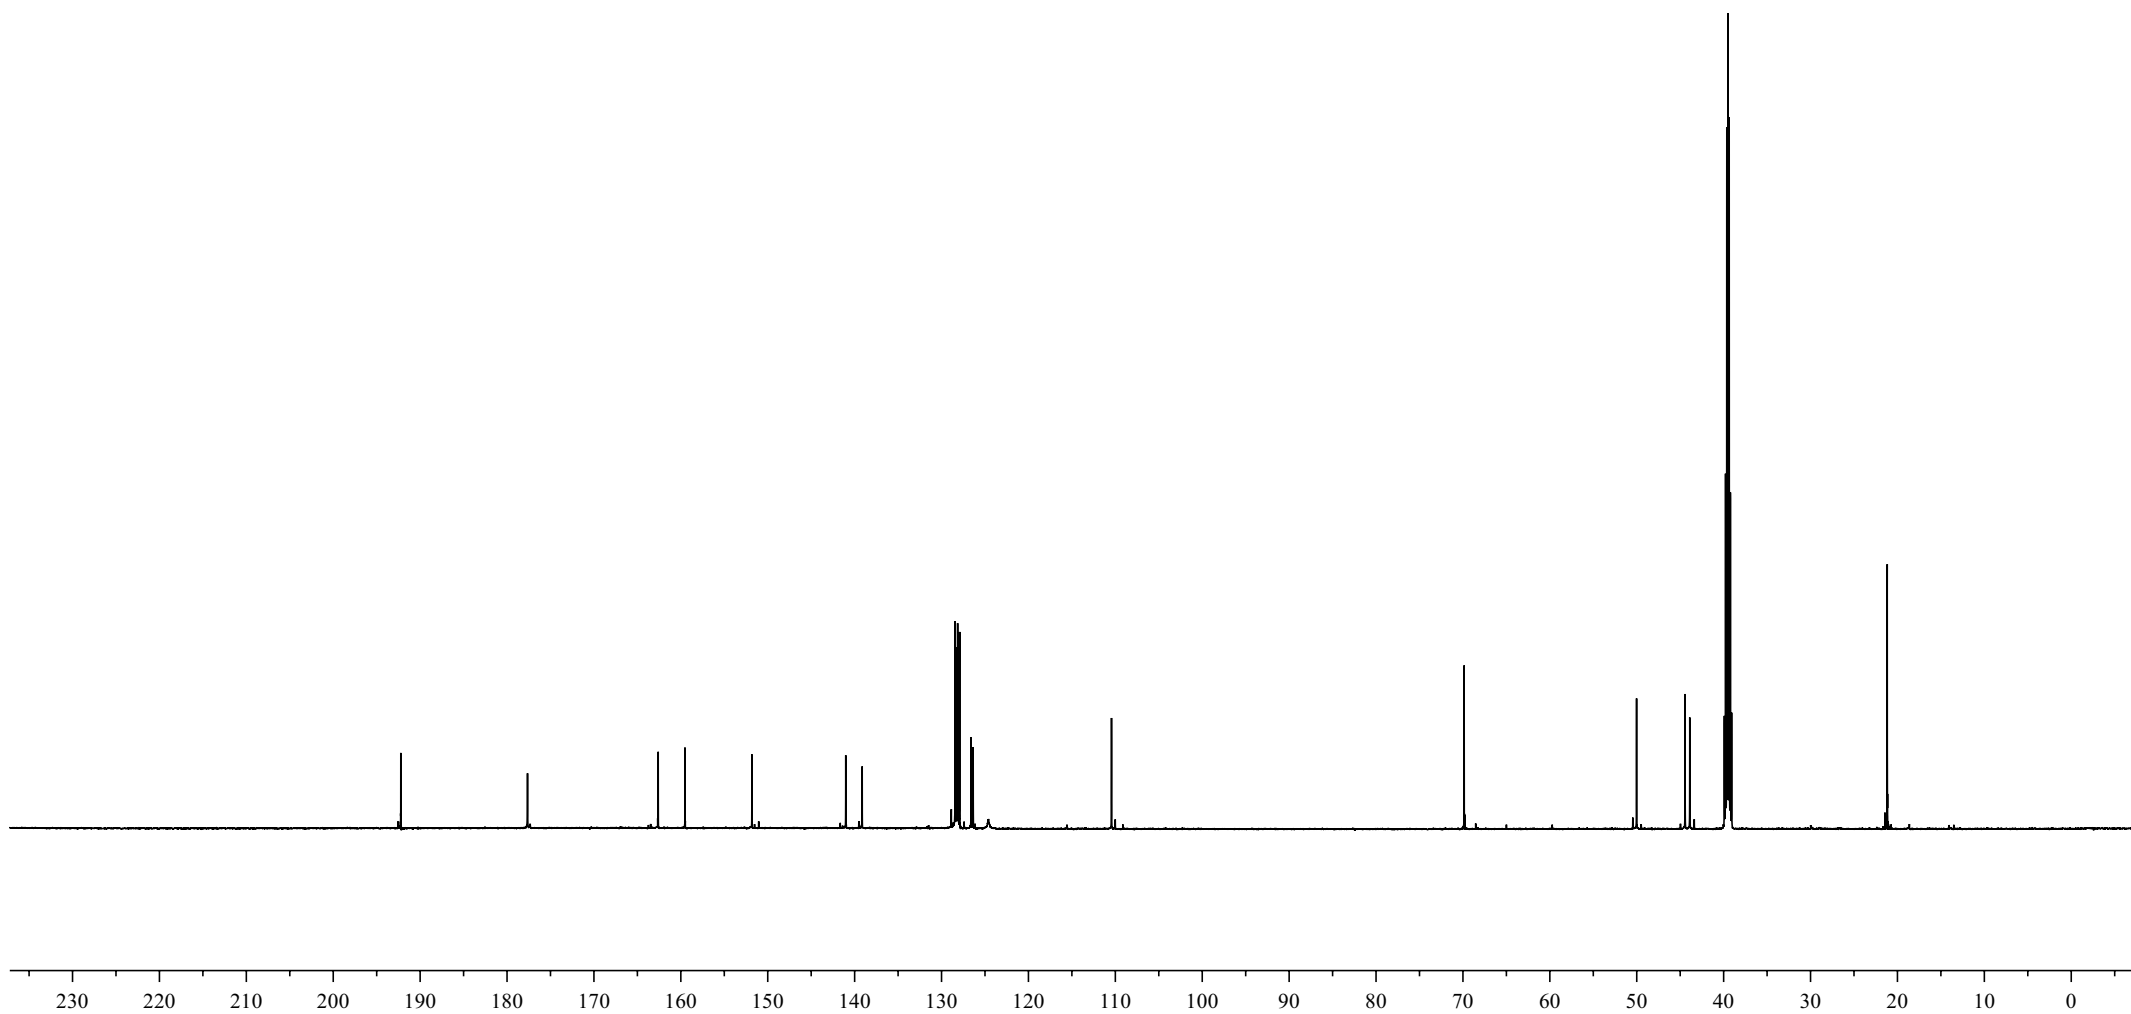

9.331  
7.539  
7.521  
7.397  
7.378  
7.359  
7.348  
7.330  
7.295  
7.276  
7.223  
7.214  
7.201  
7.182  
7.163  
7.102  
6.984  
6.485  
6.476

4.652  
4.642  
4.631  
4.617  
4.588  
4.019  
4.002  
3.992  
3.974  
3.274  
3.231  
3.205  
2.825  
2.815  
2.782  
2.773  
1.687  
1.594  
1.578  
1.446  
1.431  
1.401  
1.394  
1.370  
1.345  
1.323  
1.301  
1.274  
1.250  
1.231

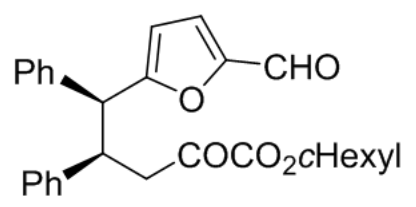

**4c**

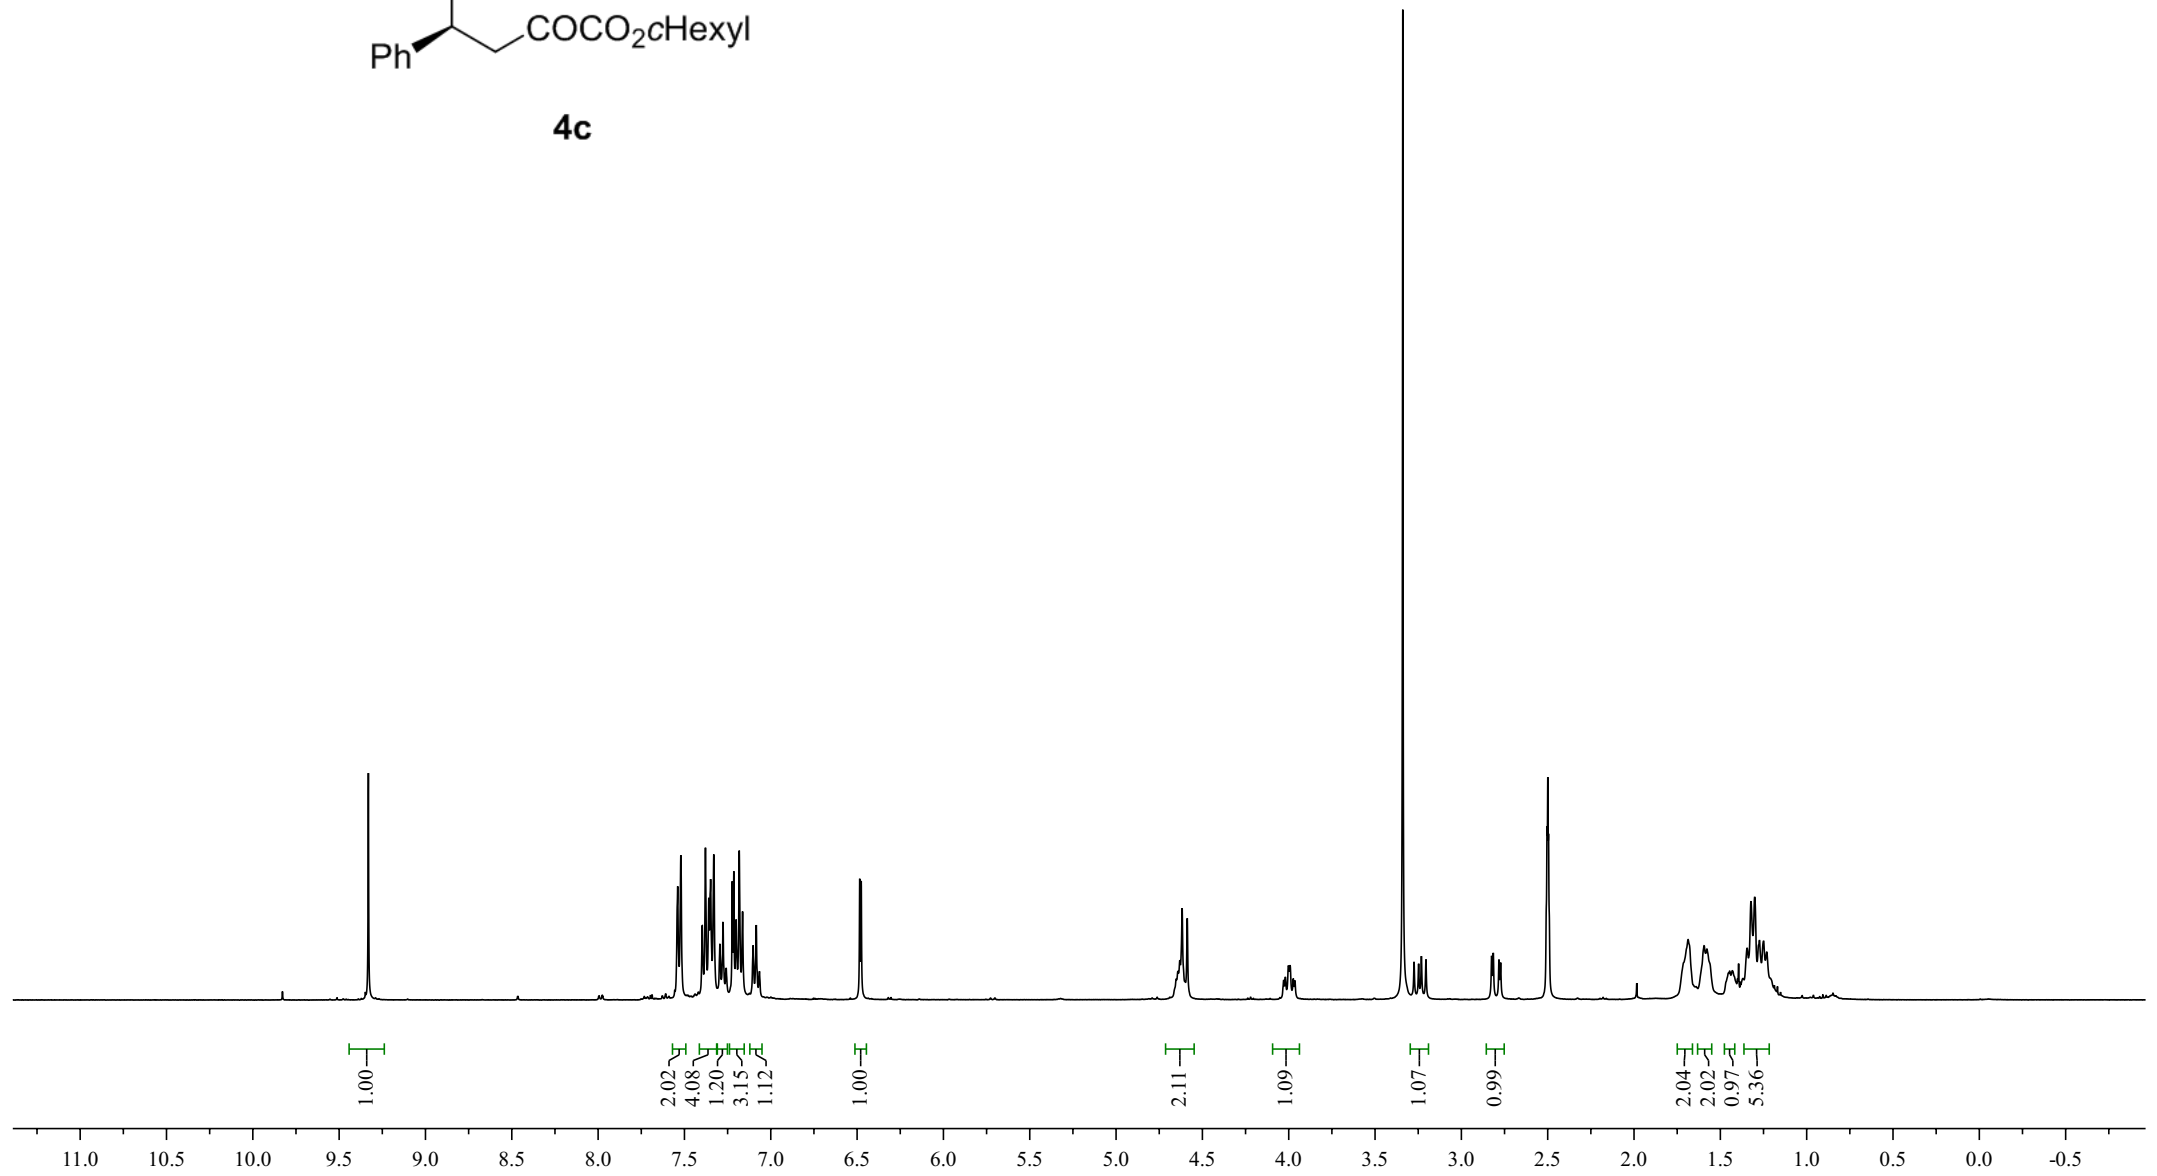



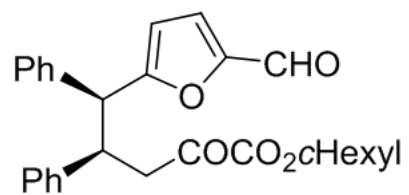

**4c**

— 192.595  
— 177.370  
— 162.661  
— 159.323  
— 151.053  
— 141.651  
— 139.526  
— 128.885  
— 128.453  
— 128.098  
— 128.044  
— 127.416  
— 126.627  
— 110.036  
— 74.133  
— 50.463  
— 44.473  
— 43.510  
— 30.554  
— 30.517  
— 24.637  
— 22.852

240 230 220 210 200 190 180 170 160 150 140 130 120 110 100 90 80 70 60 50 40 30 20 10 0 -10

S193

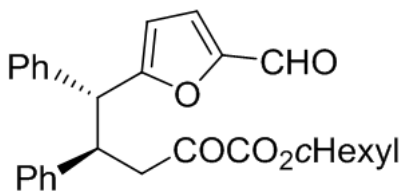

**4c'**

9.513

7.486  
7.477  
7.217  
7.214  
7.196  
7.178  
7.160  
7.142  
7.130  
7.112  
7.091  
7.071  
7.042  
7.023  
7.018  
7.005  
6.999  
6.981  
6.753  
6.744

4.703  
4.692  
4.682  
4.672  
4.661  
4.632

4.041  
4.027  
4.017  
3.989  
3.982  
3.357  
3.315

3.080  
3.069  
3.037  
3.027

1.757  
1.731  
1.633  
1.626  
1.610  
1.471  
1.464  
1.448  
1.420  
1.401  
1.394  
1.385  
1.367  
1.348  
1.337  
1.327  
1.297  
1.272  
1.253  
1.245  
1.232

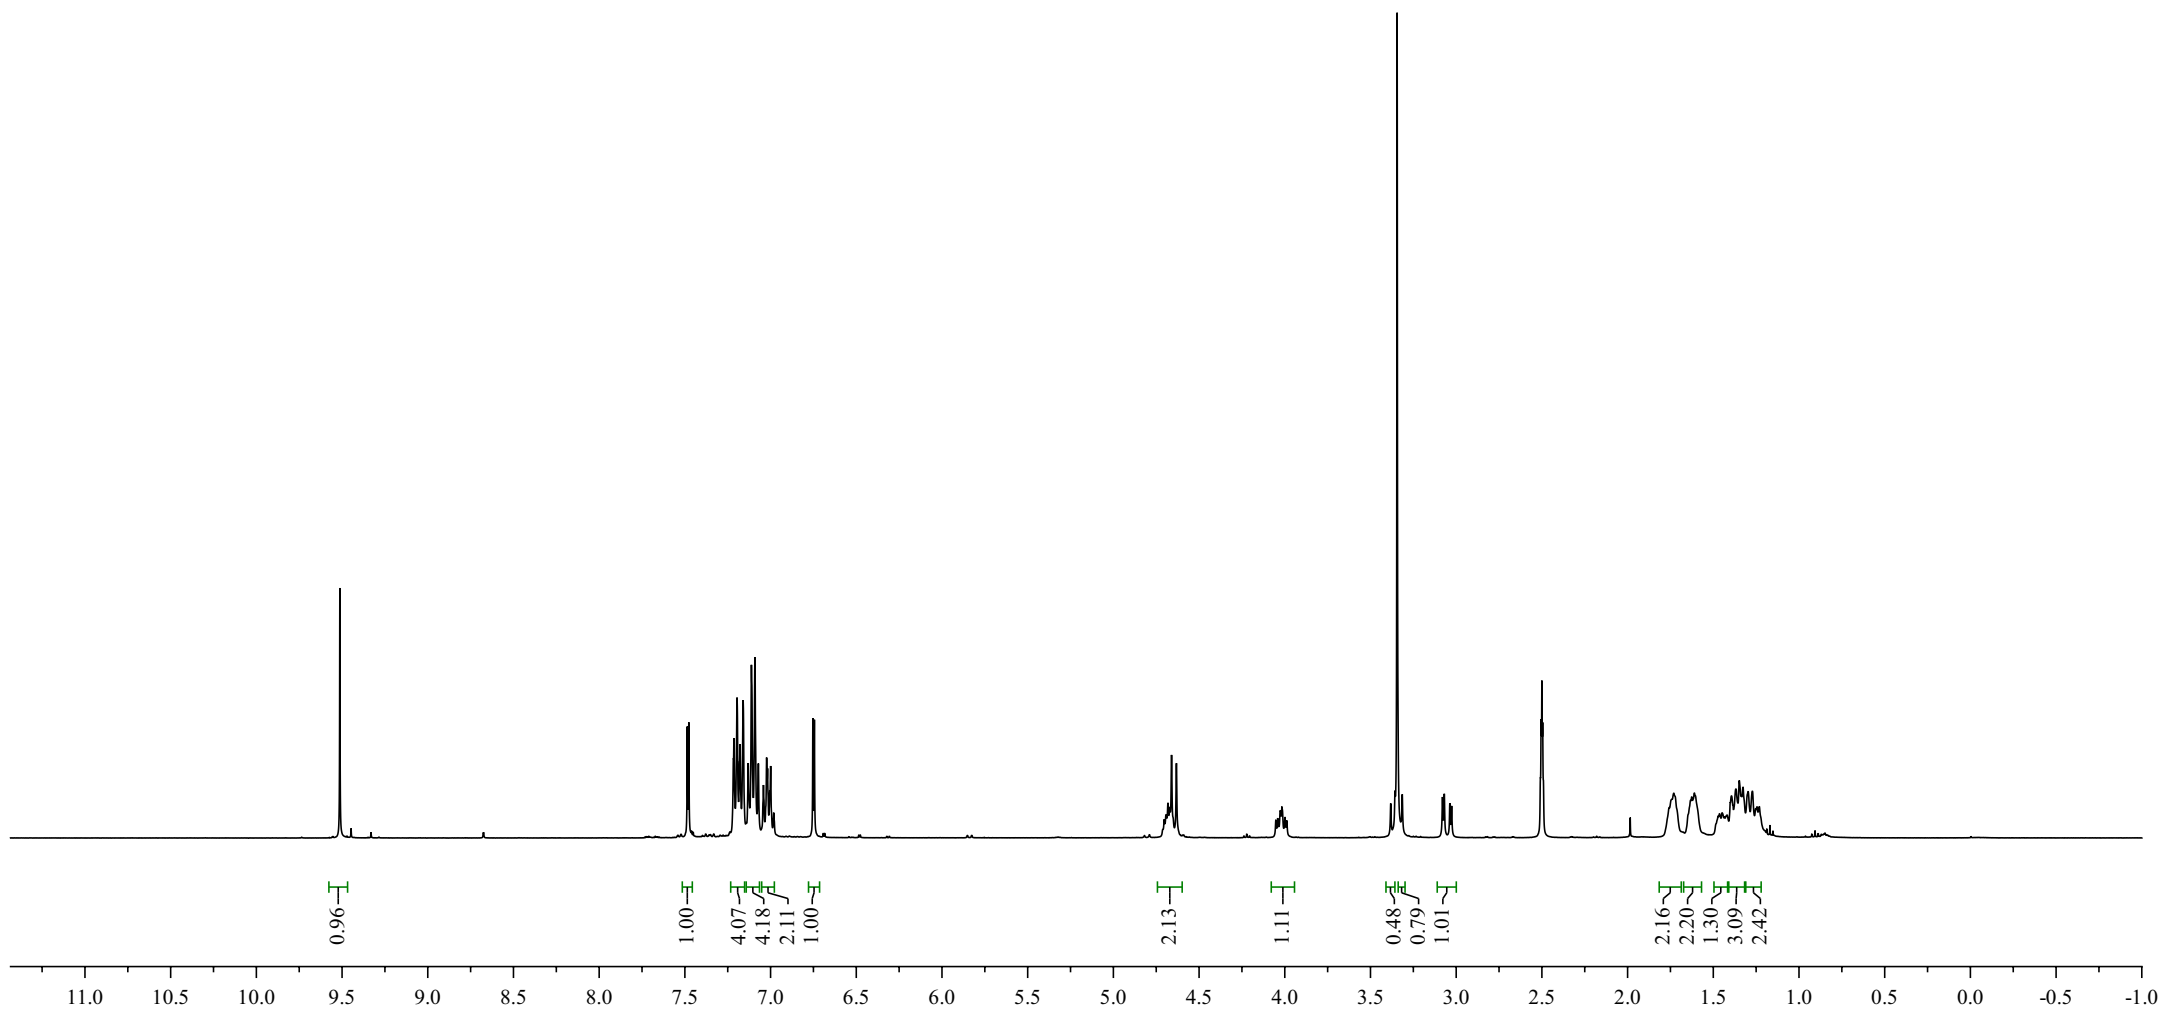

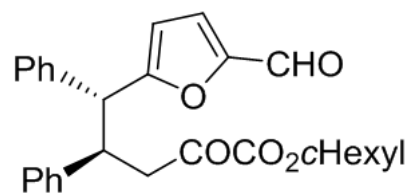

**4c'**

— 192.284  
— 177.658  
— 162.611  
— 159.353  
— 151.838  
— 141.019  
— 139.134  
— 128.450  
— 128.297  
— 128.166  
— 127.930  
— 126.614  
— 126.385  
— 110.472

— 74.215

— 50.025  
— 44.489  
— 44.006

— 30.584  
— 30.566  
— 24.645  
— 22.919

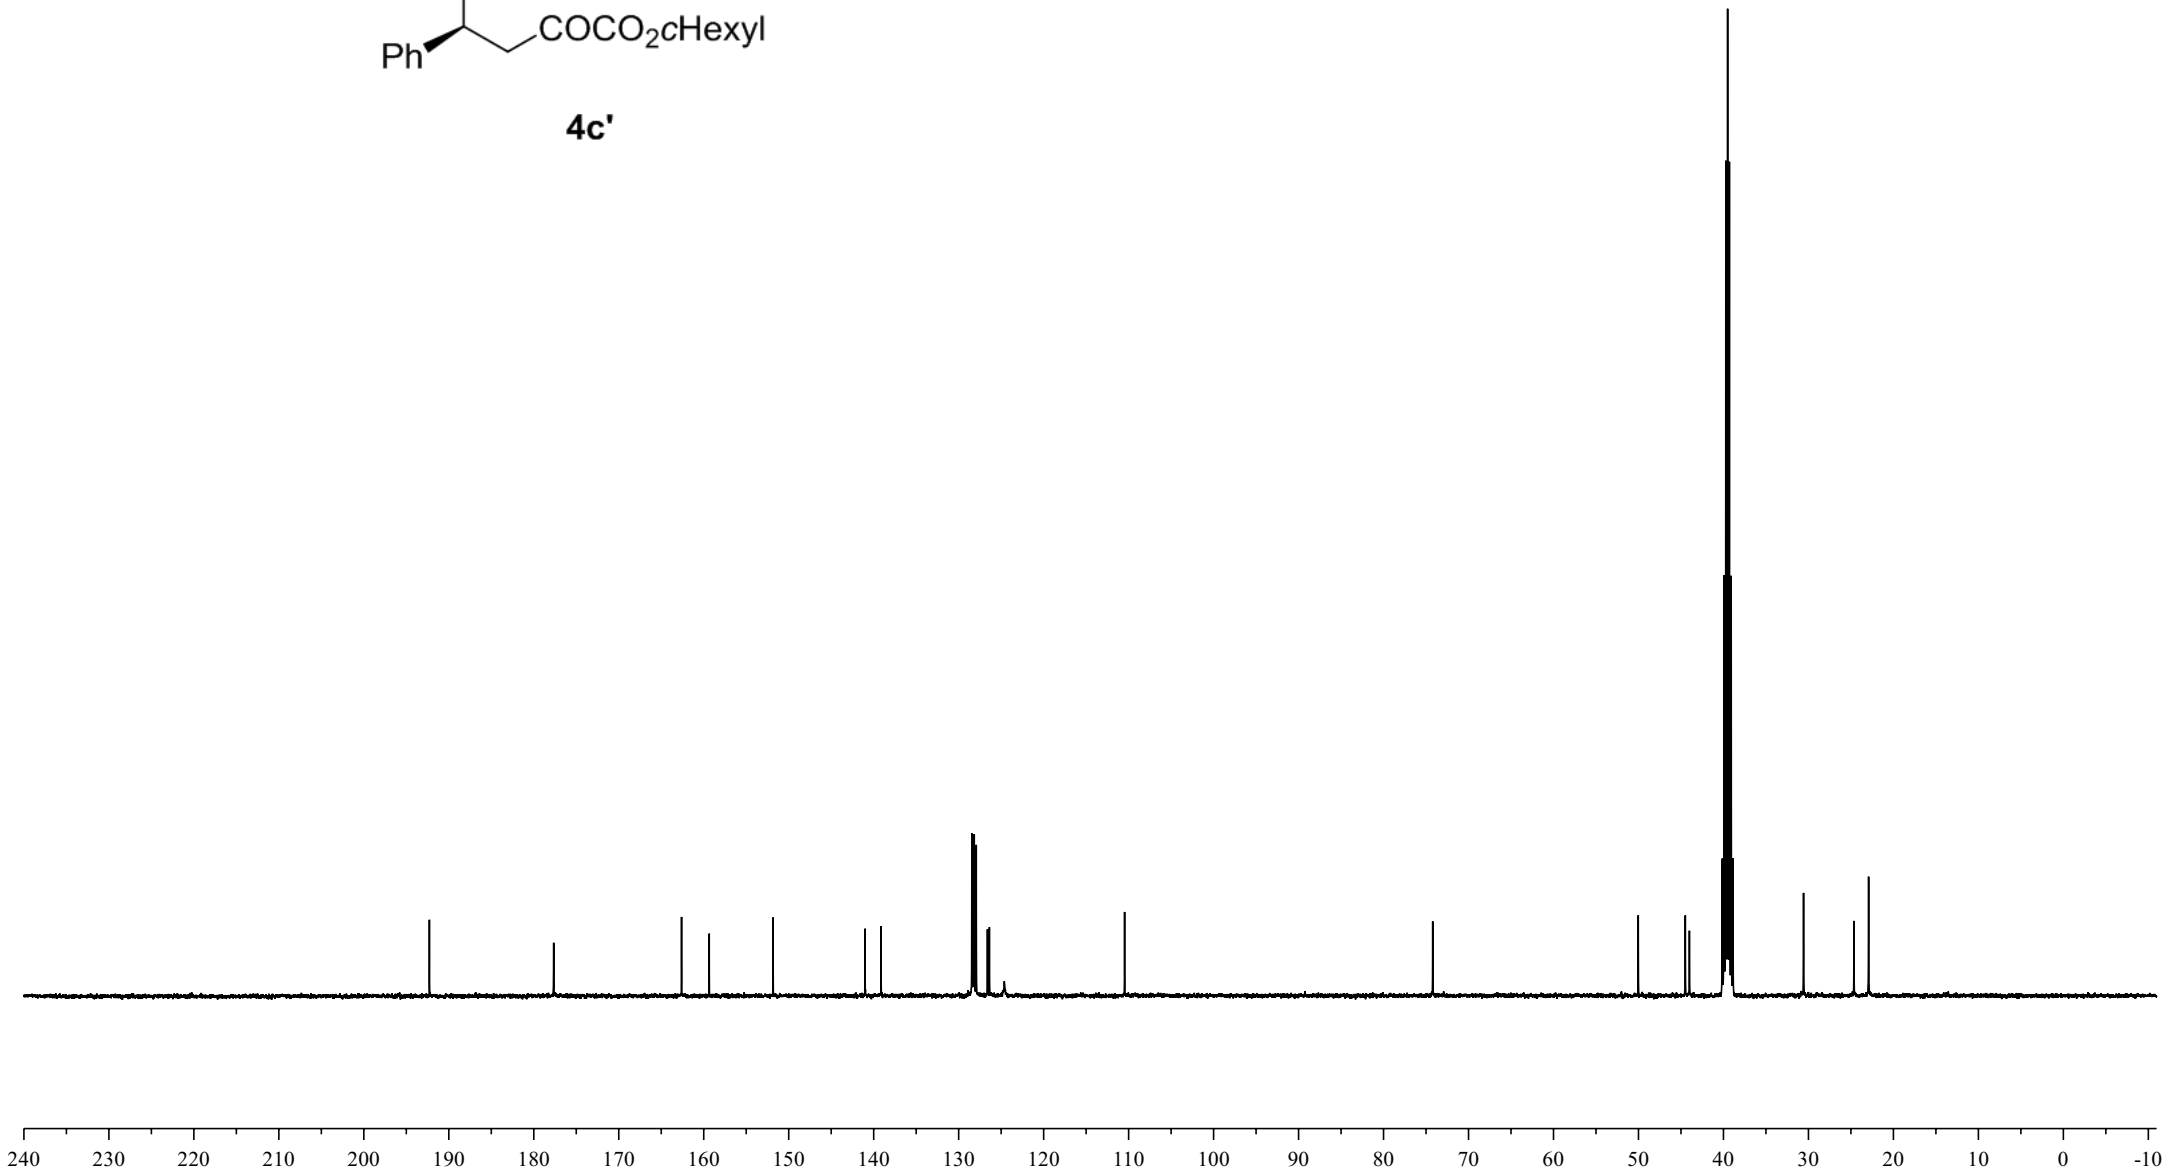

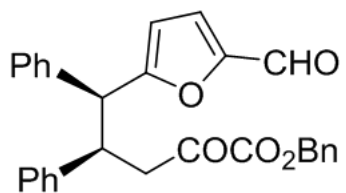

**4d**

9.331  
7.513  
7.495  
7.390  
7.372  
7.368  
7.347  
7.327  
7.308  
7.258  
7.220  
7.211  
7.188  
7.170  
7.151  
7.078  
6.471  
6.462

5.093  
4.616  
4.586  
4.034  
4.016  
4.004  
3.986  
3.312  
3.269  
3.243  
2.879  
2.869  
2.836  
2.826

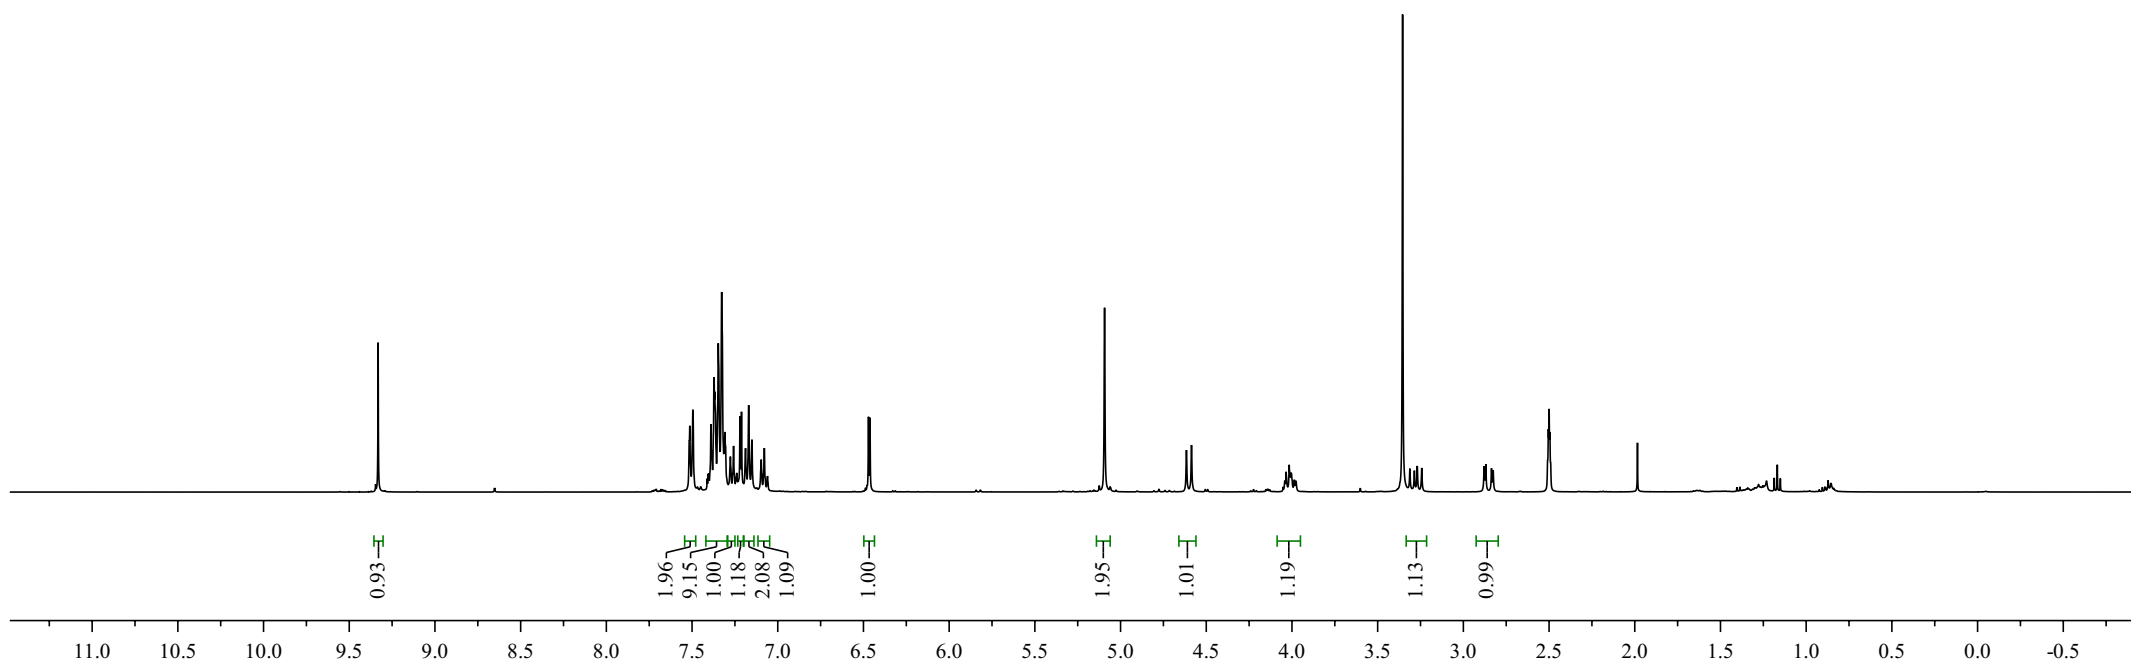

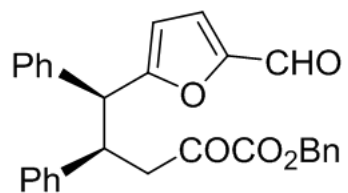

**4d**

191.838  
177.368  
162.683  
159.576  
151.053  
139.494  
134.878  
128.869  
128.475  
128.454  
128.412  
128.385  
128.082  
128.048  
127.401  
126.618  
110.004

67.012

50.448  
44.325  
43.657

240 230 220 210 200 190 180 170 160 150 140 130 120 110 100 90 80 70 60 50 40 30 20 10 0 -10

9.501  
 7.449  
 7.440  
 7.400  
 7.394  
 7.386  
 7.378  
 7.370  
 7.367  
 7.361  
 7.190  
 7.172  
 7.153  
 7.135  
 7.123  
 7.105  
 7.089  
 7.086  
 7.071  
 7.052  
 7.037  
 7.019  
 7.007  
 6.989  
 6.720  
 5.149  
 4.654  
 4.625  
 4.036  
 4.024  
 4.018  
 4.014  
 3.416  
 3.391  
 3.372  
 3.136  
 3.125  
 3.093  
 3.082

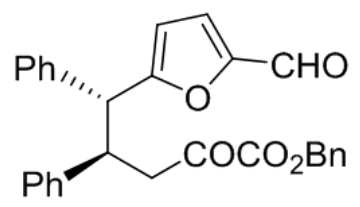

**4d'**

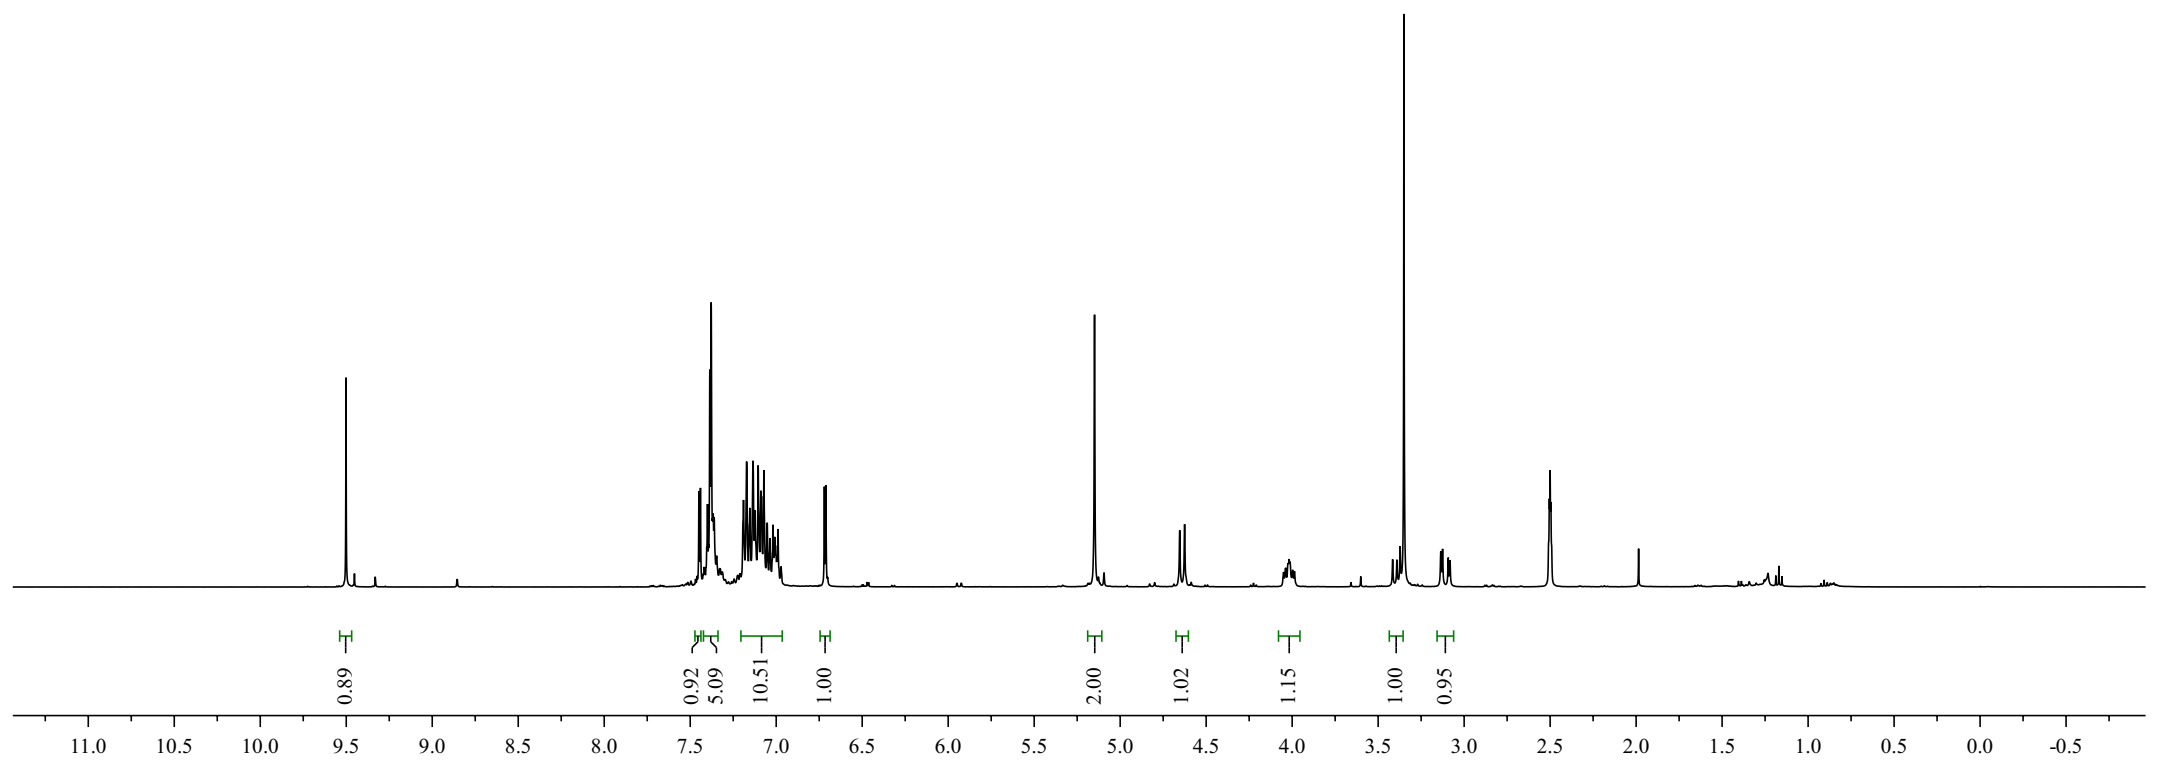

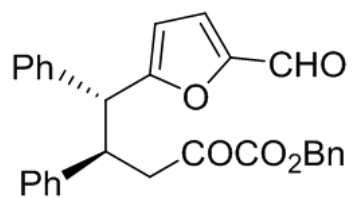

4d'

191.518  
177.675  
162.631  
159.623  
151.801  
141.036  
139.139  
134.938  
128.499  
128.450  
128.287  
128.147  
127.896  
126.599  
126.358  
110.405

67.067  
49.975  
44.316  
44.171

240 230 220 210 200 190 180 170 160 150 140 130 120 110 100 90 80 70 60 50 40 30 20 10 0 -10

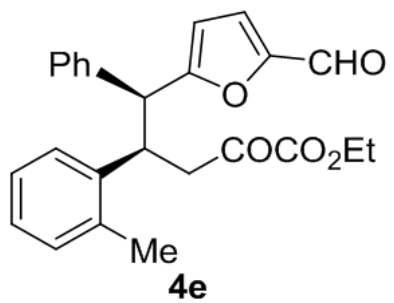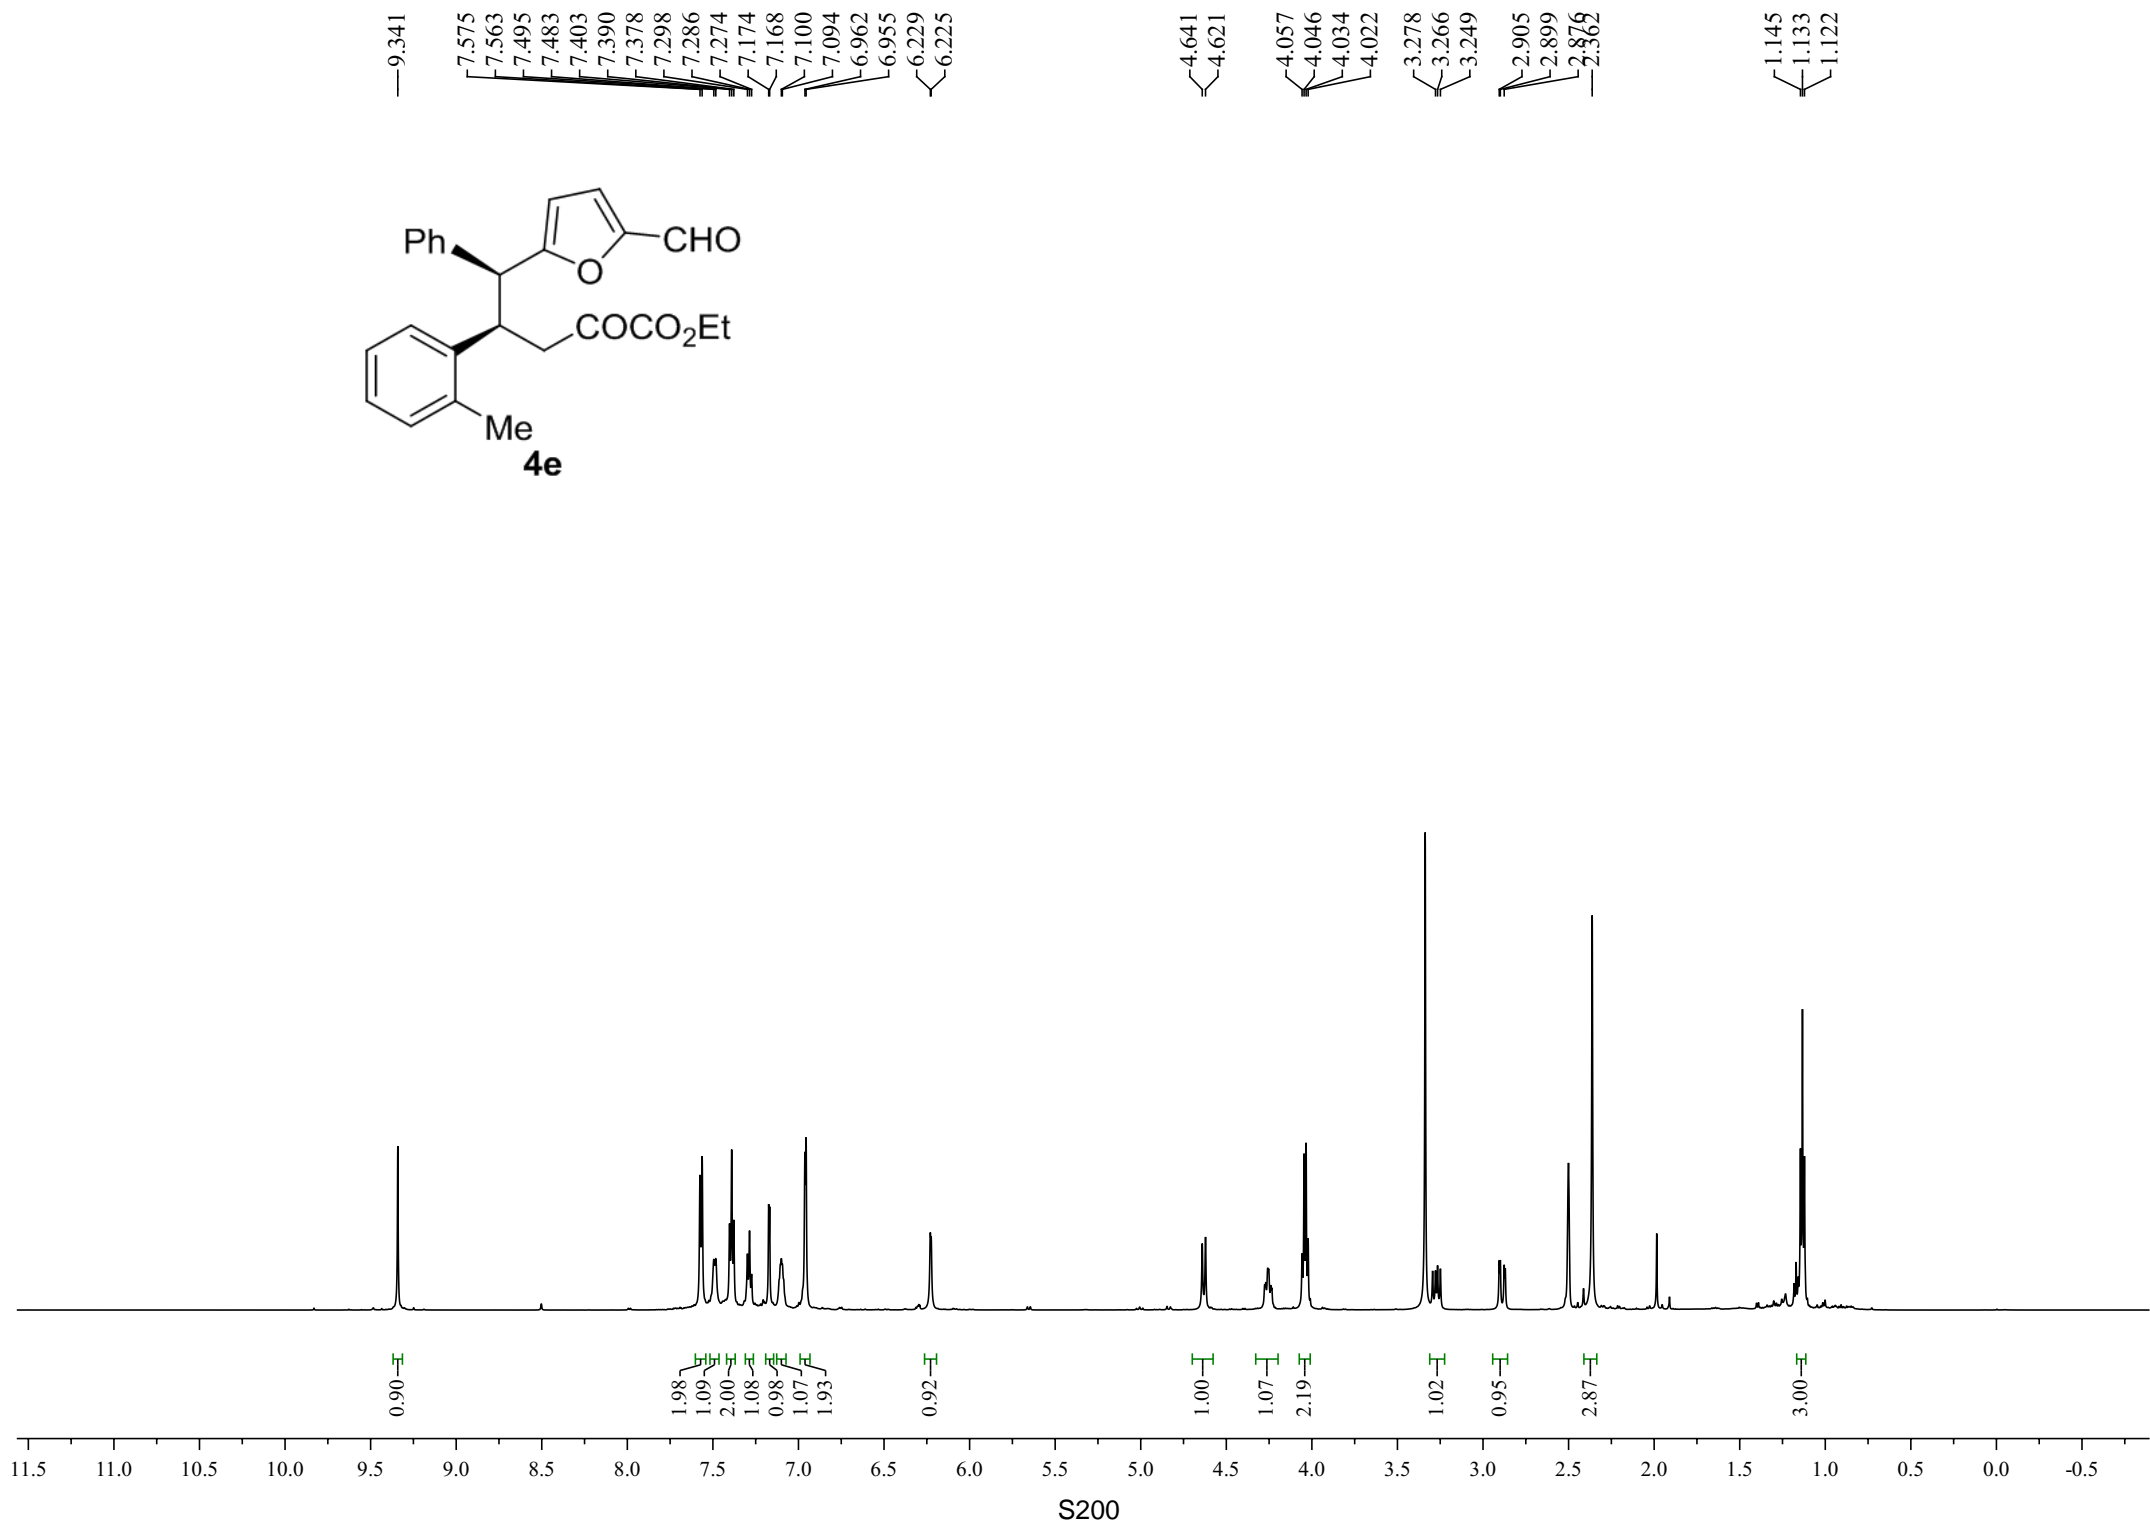



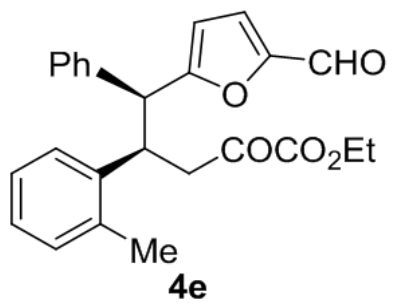

—192.160  
—177.223  
—162.507  
—159.849  
—151.158  
140.032  
139.376  
135.942  
129.886  
128.869  
128.532  
127.415  
126.425  
126.229  
125.983  
—109.619

—61.650  
—59.726

—50.460  
—43.998

—20.726  
—19.030  
—13.640

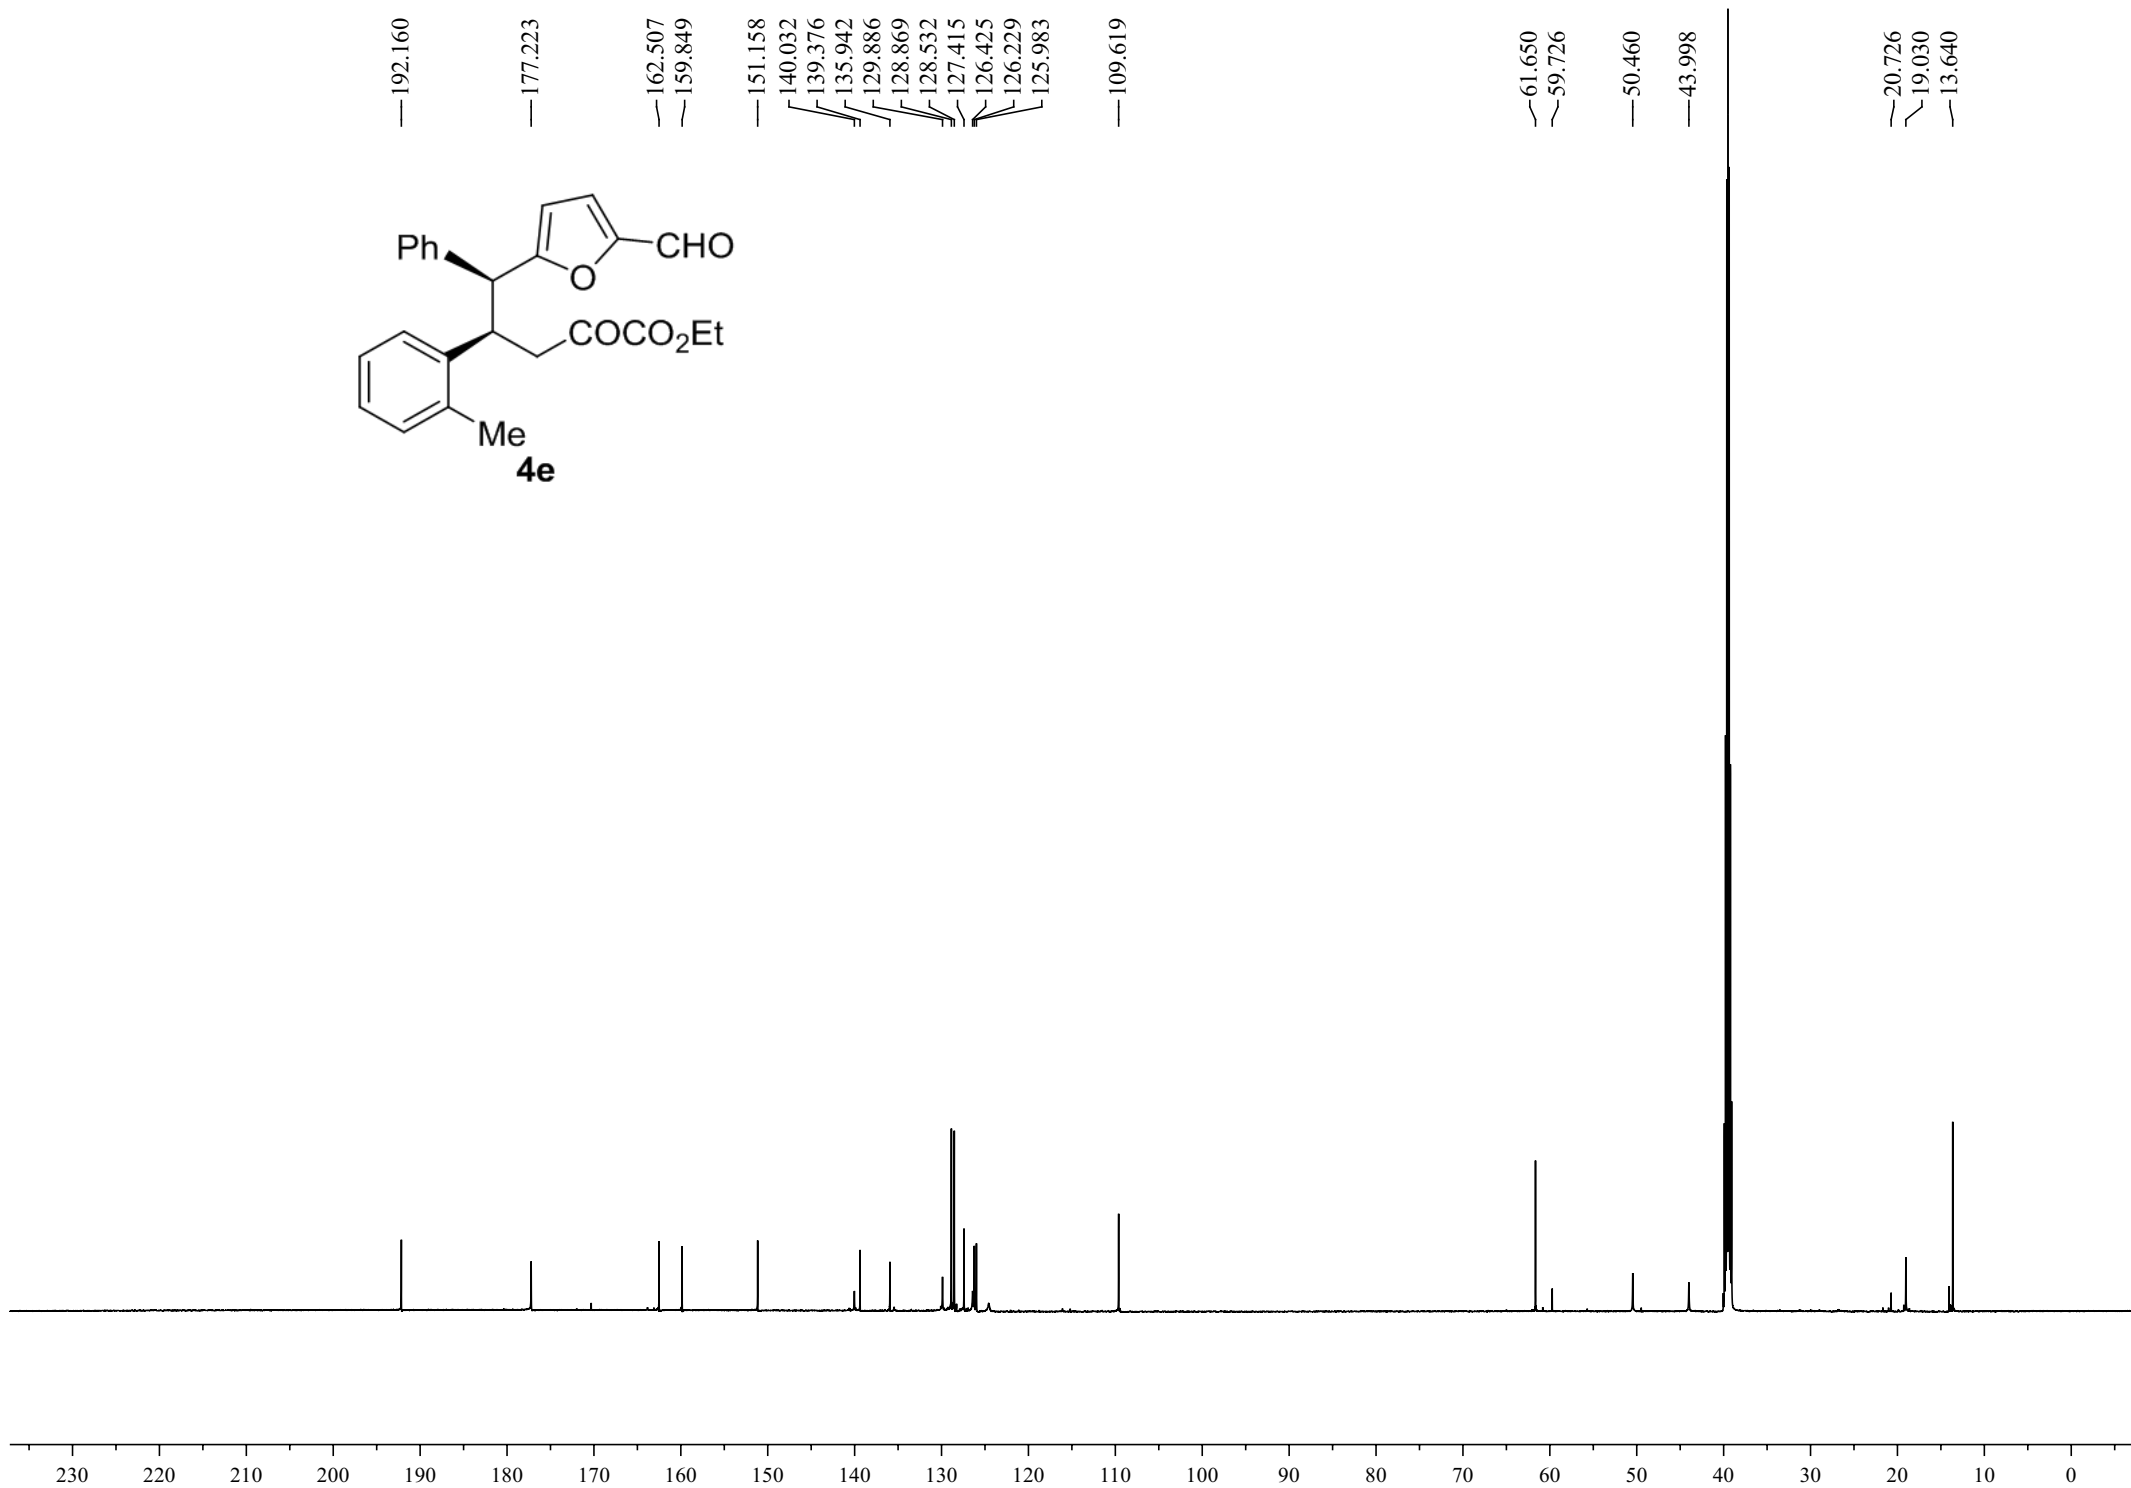

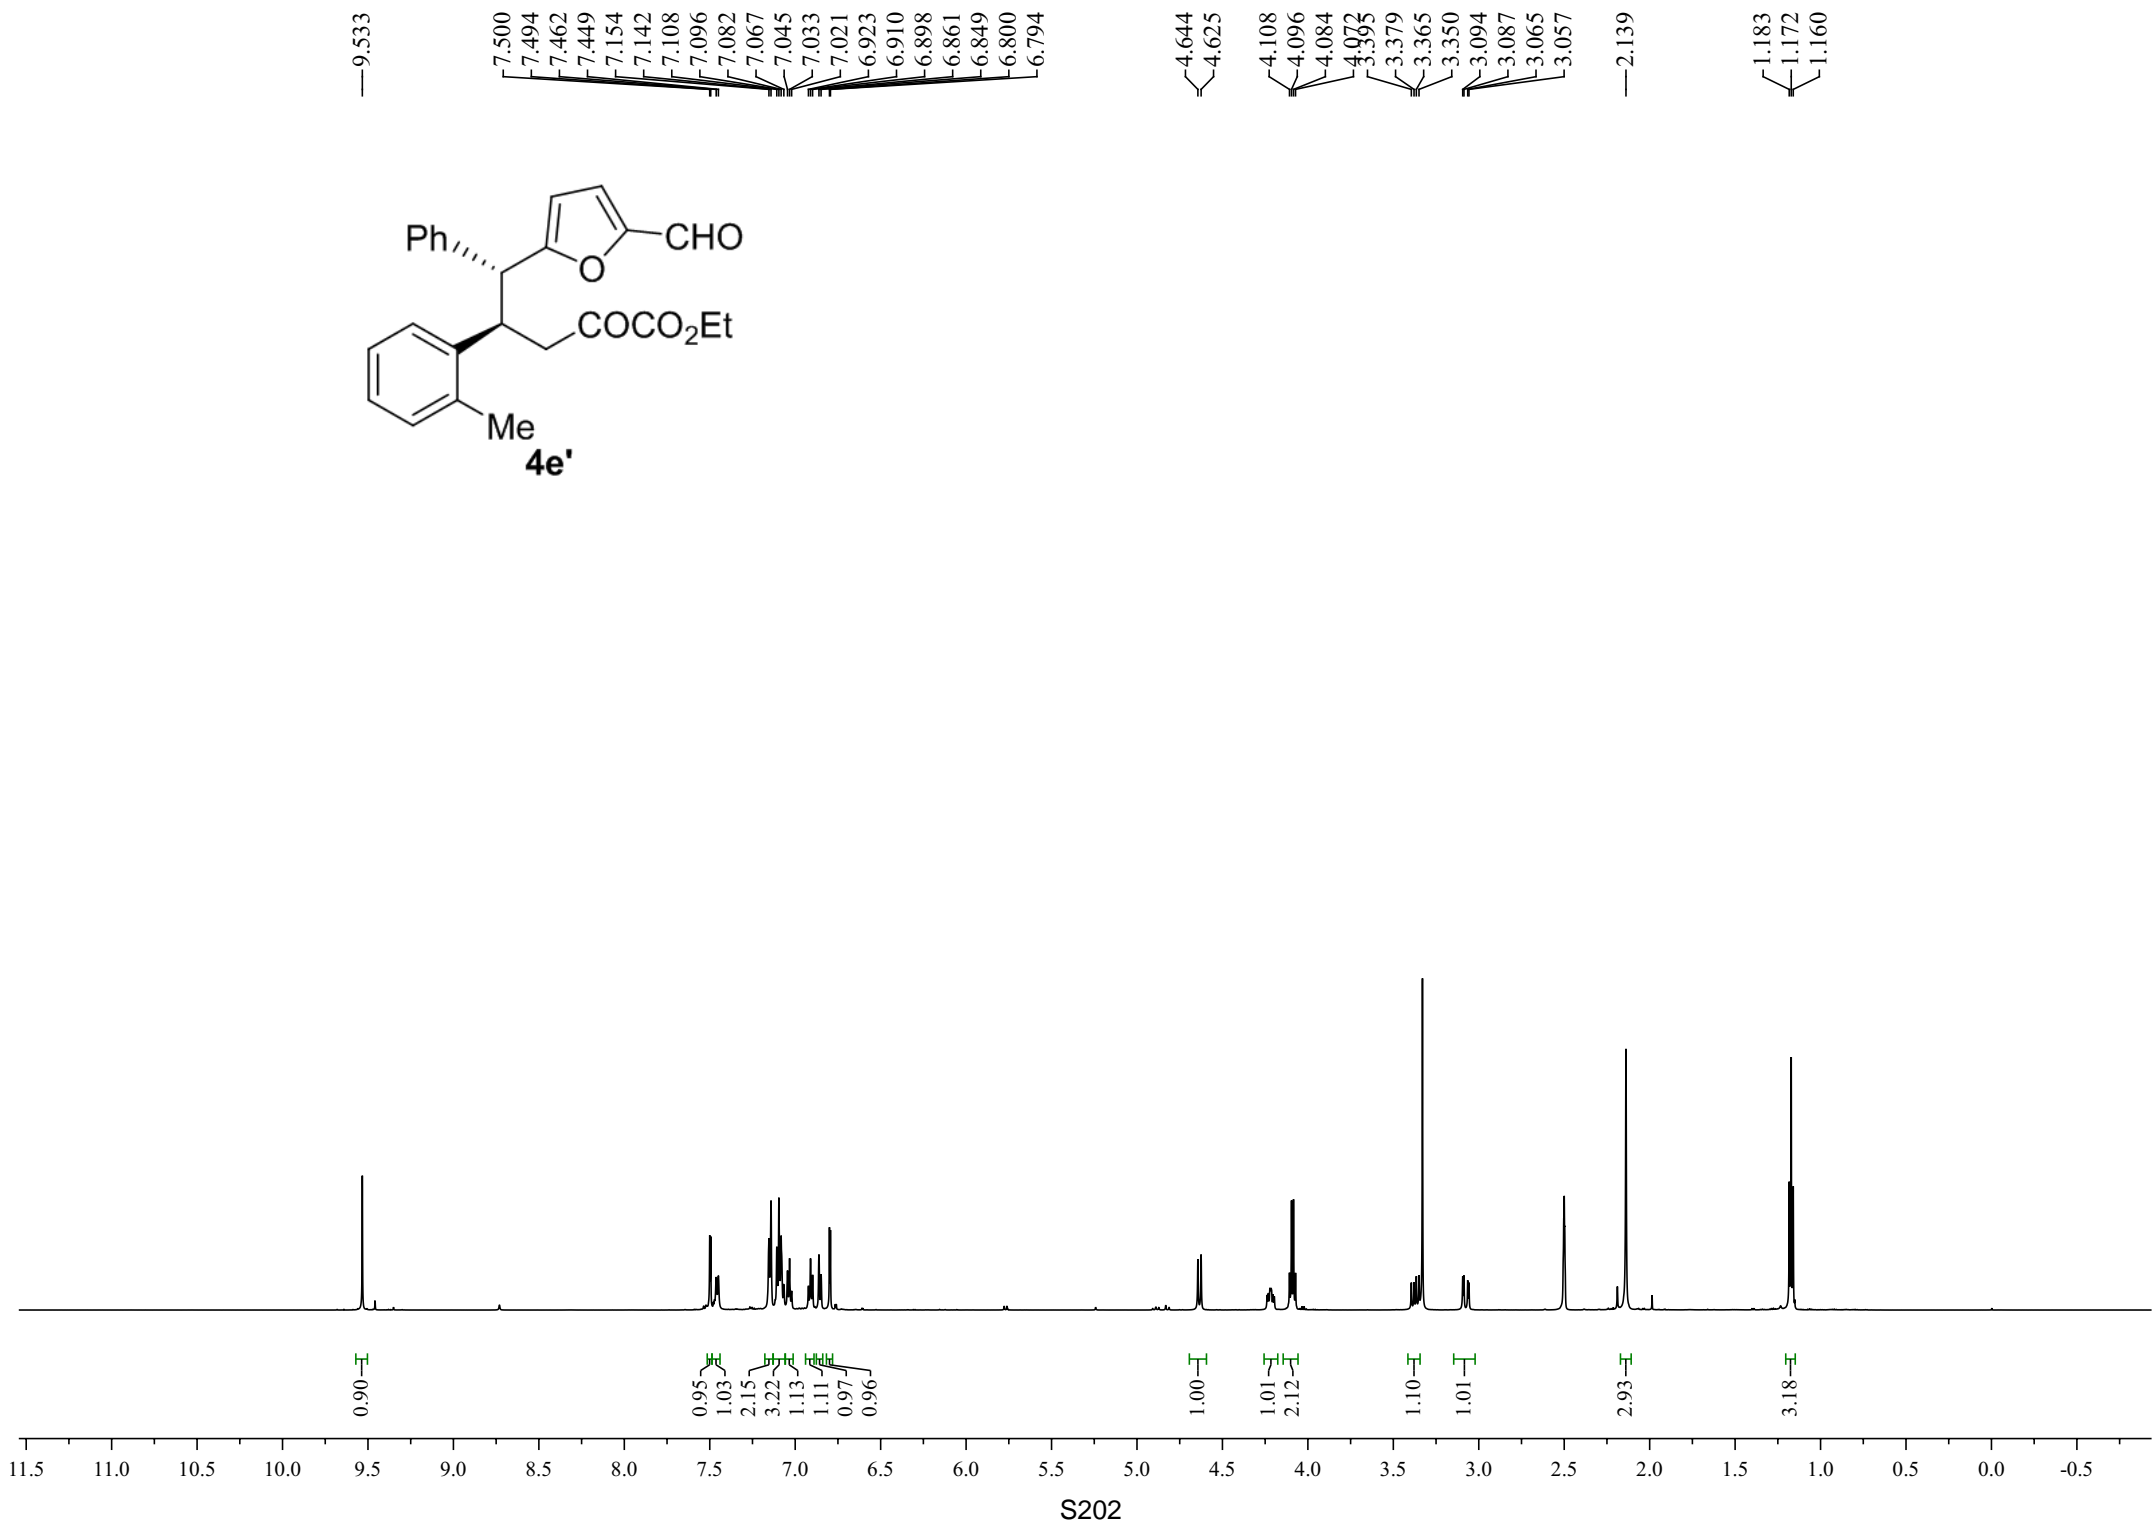

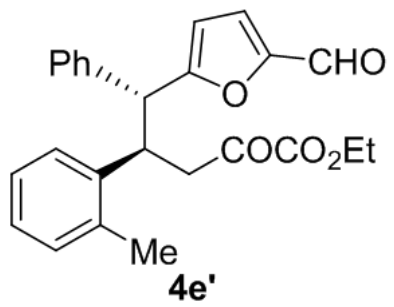

—191.846  
—177.711  
—162.461  
—159.886  
—151.861  
139.748  
139.137  
135.869  
129.748  
128.176  
127.966  
126.678  
126.085  
125.890  
—110.751

—61.709

—50.158

—44.449

—19.394

—13.667

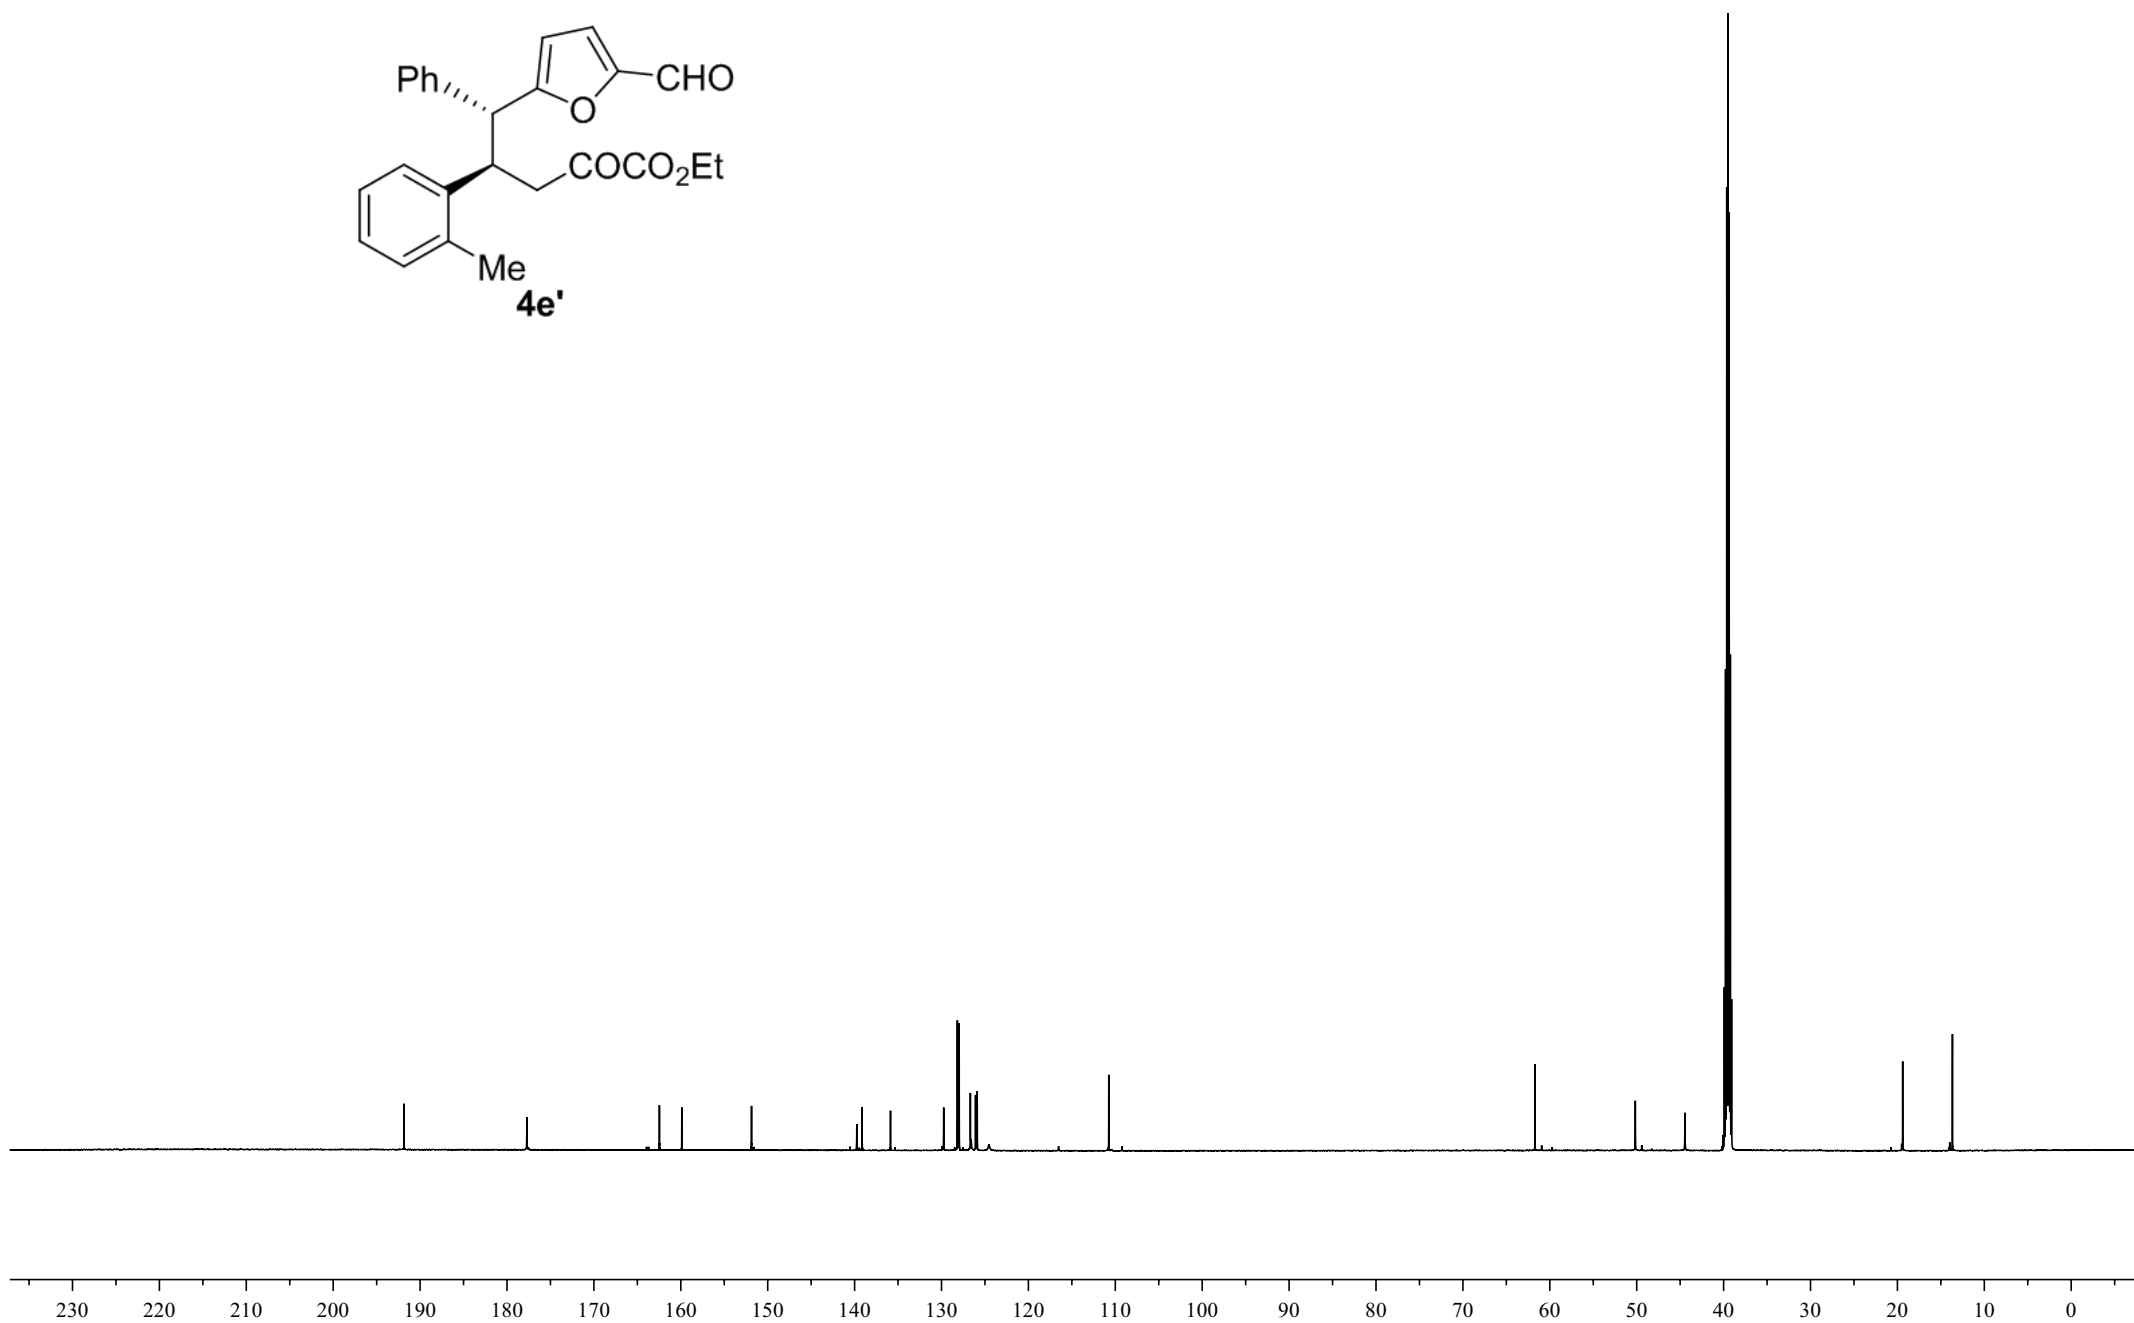

9.420  
7.452  
7.449  
7.431  
7.371  
7.367  
7.354  
7.334  
7.294  
7.290  
7.275  
7.260  
7.074  
7.055  
7.016  
6.995  
6.936  
6.927  
6.918  
6.099  
6.091

4.314  
4.285  
4.159  
4.145  
4.141  
4.127  
4.124  
4.115  
4.109  
4.106  
4.101  
4.097  
4.091  
3.772  
3.247  
3.228  
3.204  
2.938  
2.928  
2.895  
2.884  
2.246

1.252  
1.234  
1.216

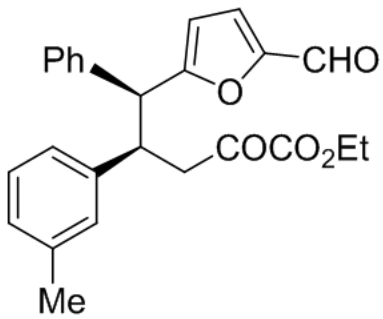

4f

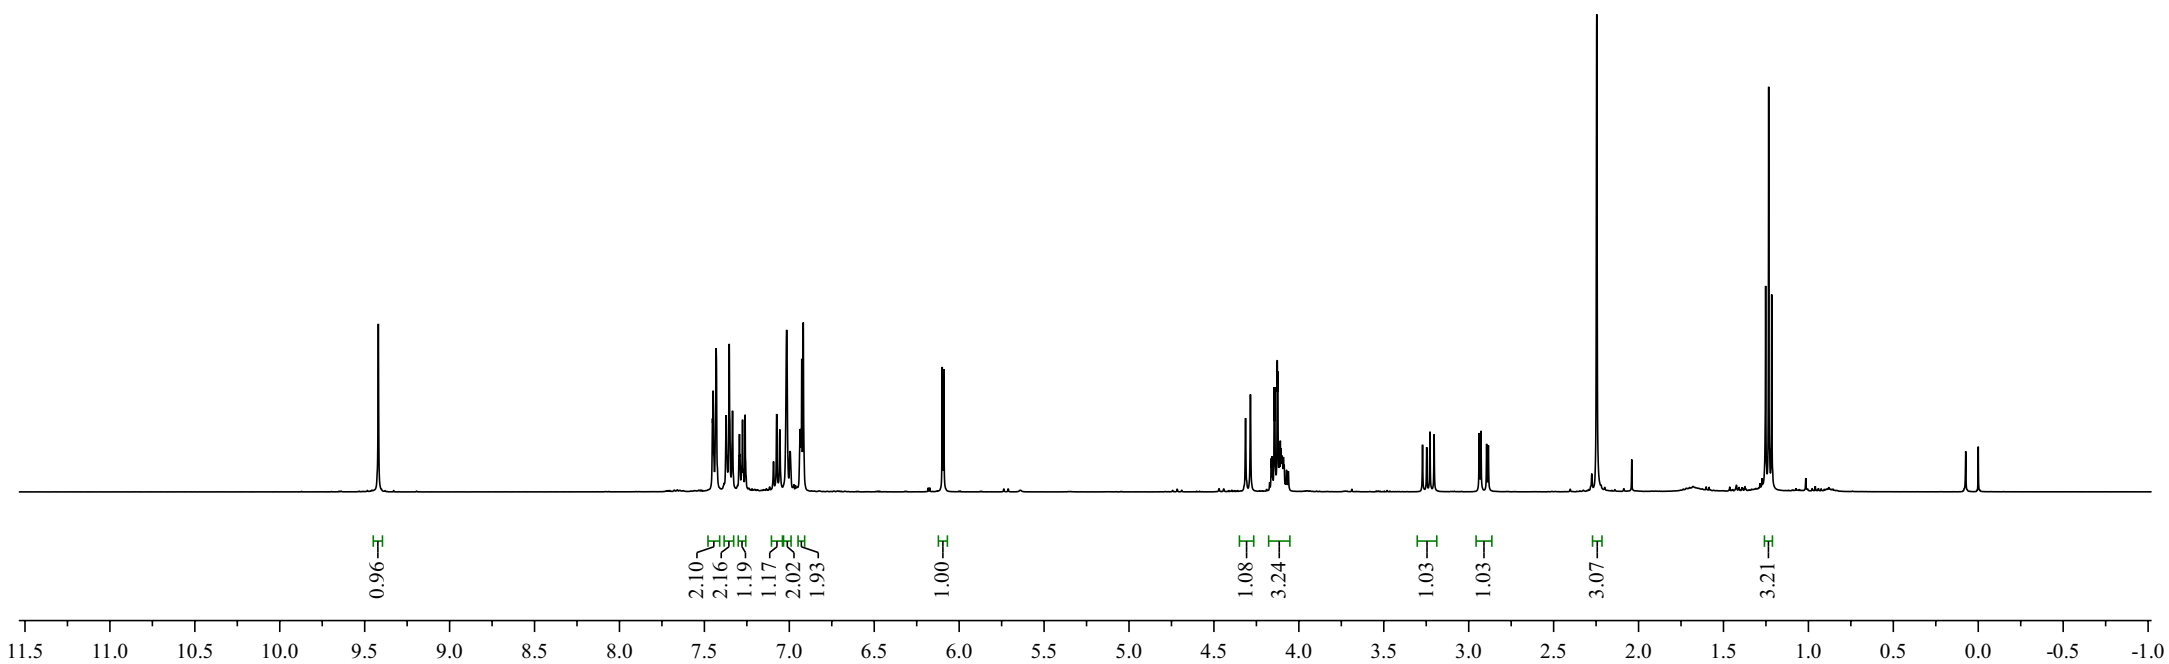

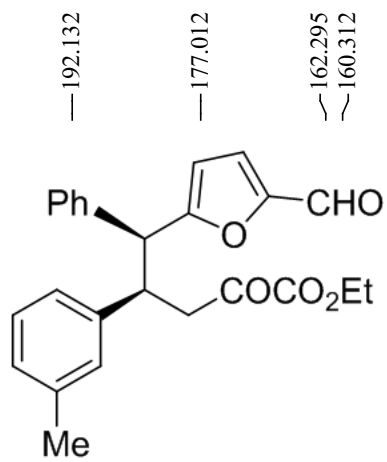

**4f**

—192.132  
 —177.012  
 —162.295  
 —160.312  
 —151.760  
 —140.874  
 —138.598  
 —138.016  
 —129.094  
 —128.555  
 —128.528  
 —128.314  
 —127.807  
 —127.773  
 —127.566

—62.342  
 —52.021  
 —44.775  
 —43.793  
 —21.326  
 —13.800

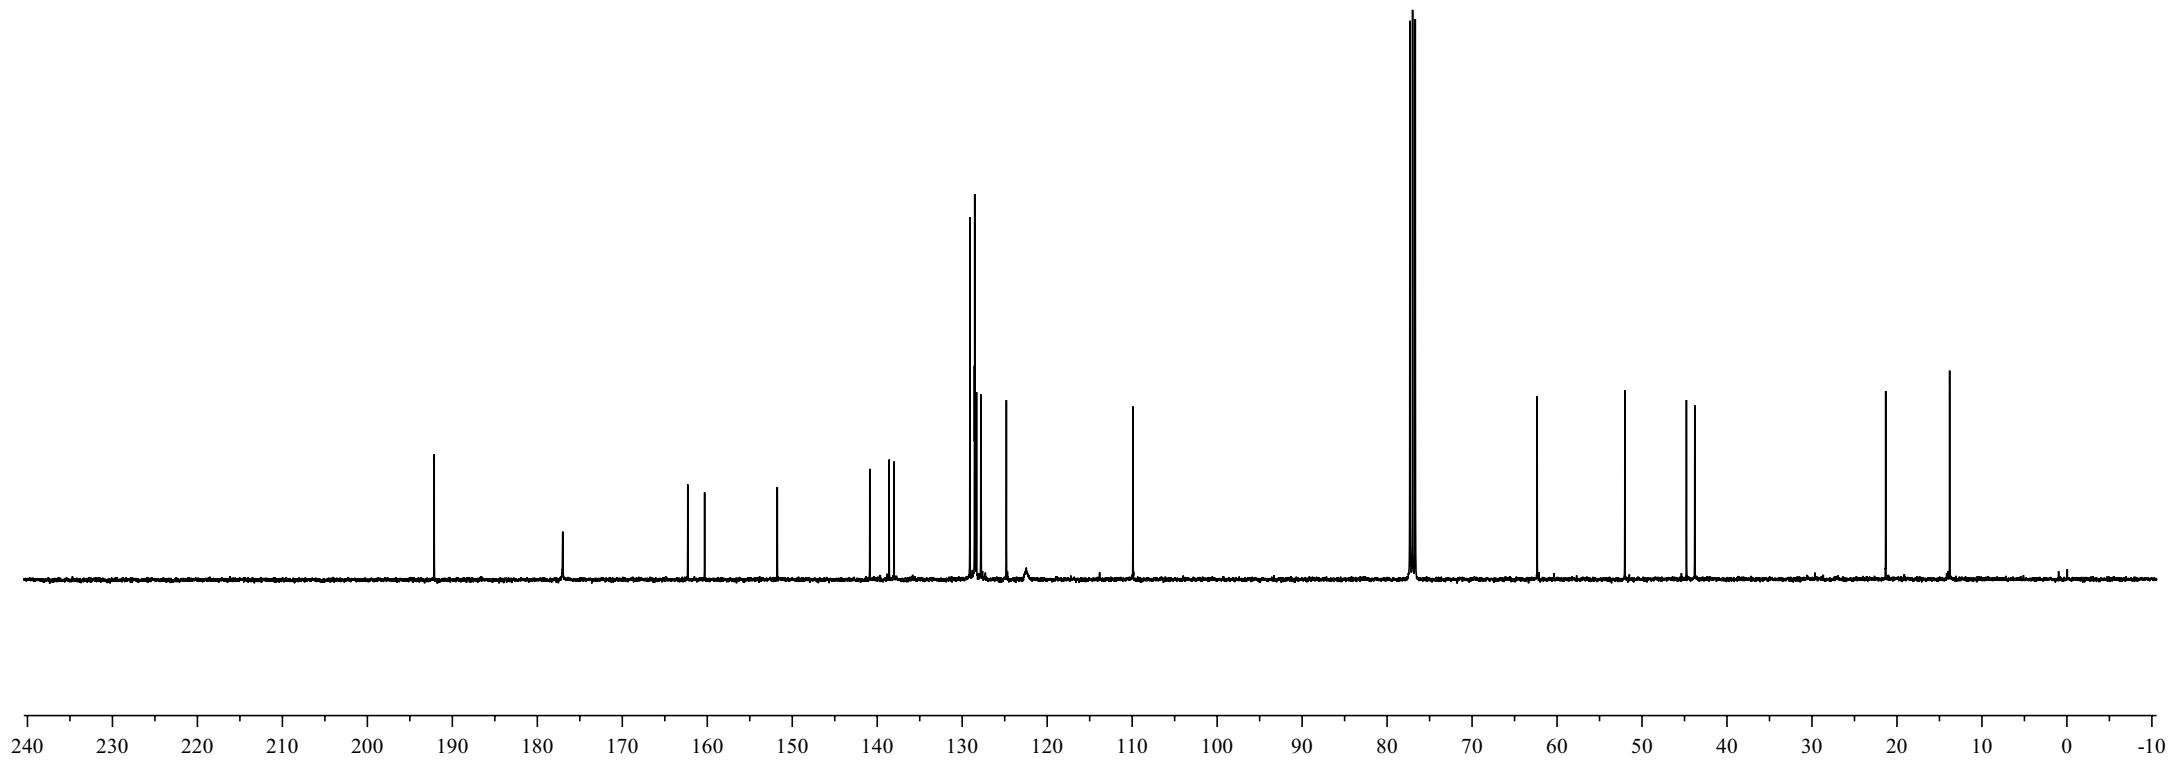

9.581  
 7.161  
 7.152  
 7.147  
 7.136  
 7.119  
 7.109  
 7.101  
 7.098  
 7.087  
 7.075  
 7.016  
 6.997  
 6.977  
 6.871  
 6.853  
 6.829  
 6.813  
 6.811  
 6.402  
 4.342  
 4.315  
 4.225  
 4.222  
 4.207  
 4.204  
 4.189  
 4.187  
 4.171  
 4.169  
 4.111  
 4.099  
 4.089  
 4.076  
 4.072  
 3.407  
 3.385  
 3.363  
 3.341  
 3.175  
 3.163  
 3.131  
 3.119  
 2.187  
 1.293  
 1.275  
 1.257

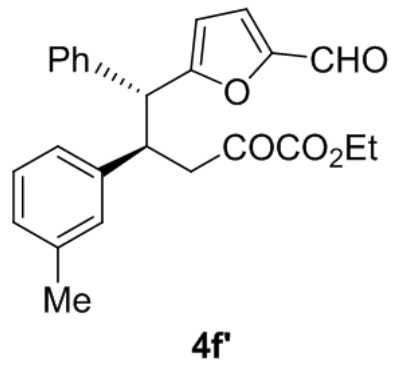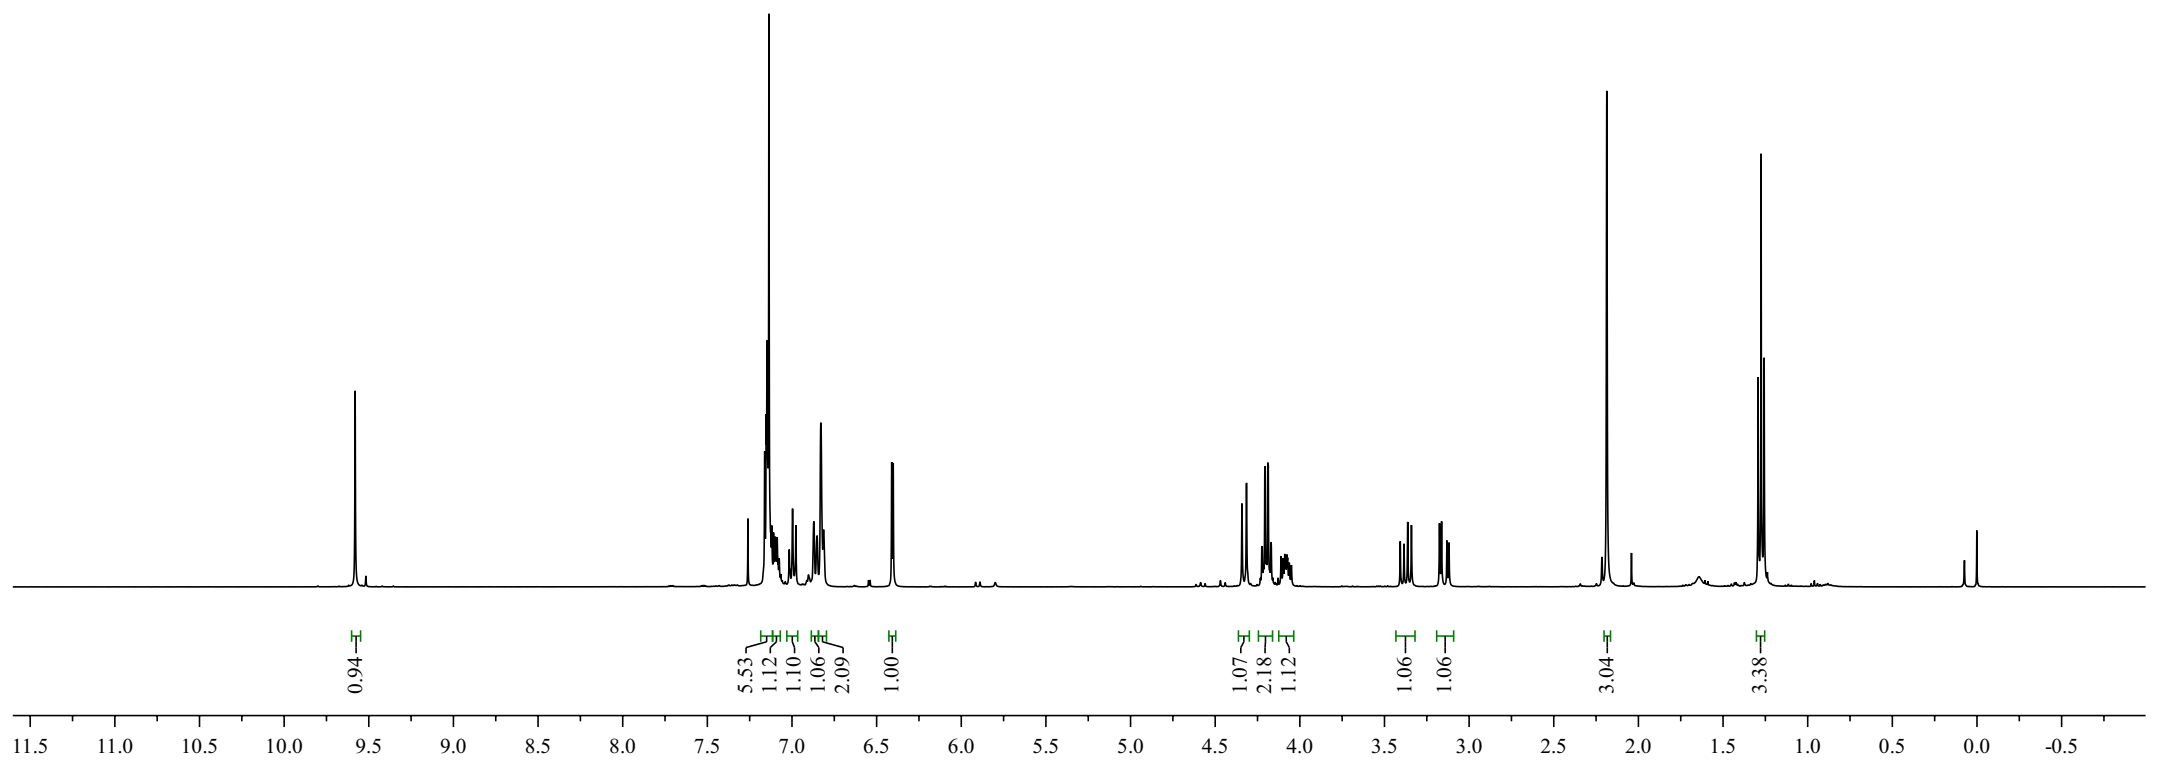

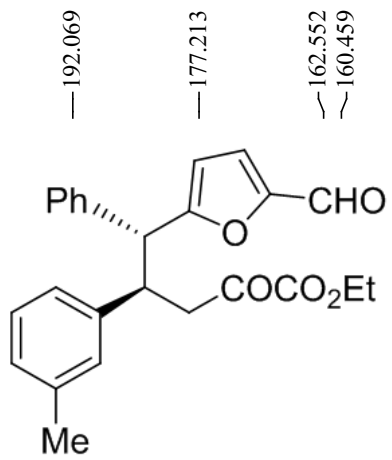

**4f**

— 192.069 — 177.213 — 162.552 — 160.459 — 152.218 — 140.250 — 138.338 — 137.752 — 128.971 — 128.507 — 128.318 — 128.109 — 127.589 — 125.952 — 110.445

— 62.457

— 51.632

— 45.012

— 44.003

— 21.270

— 13.841

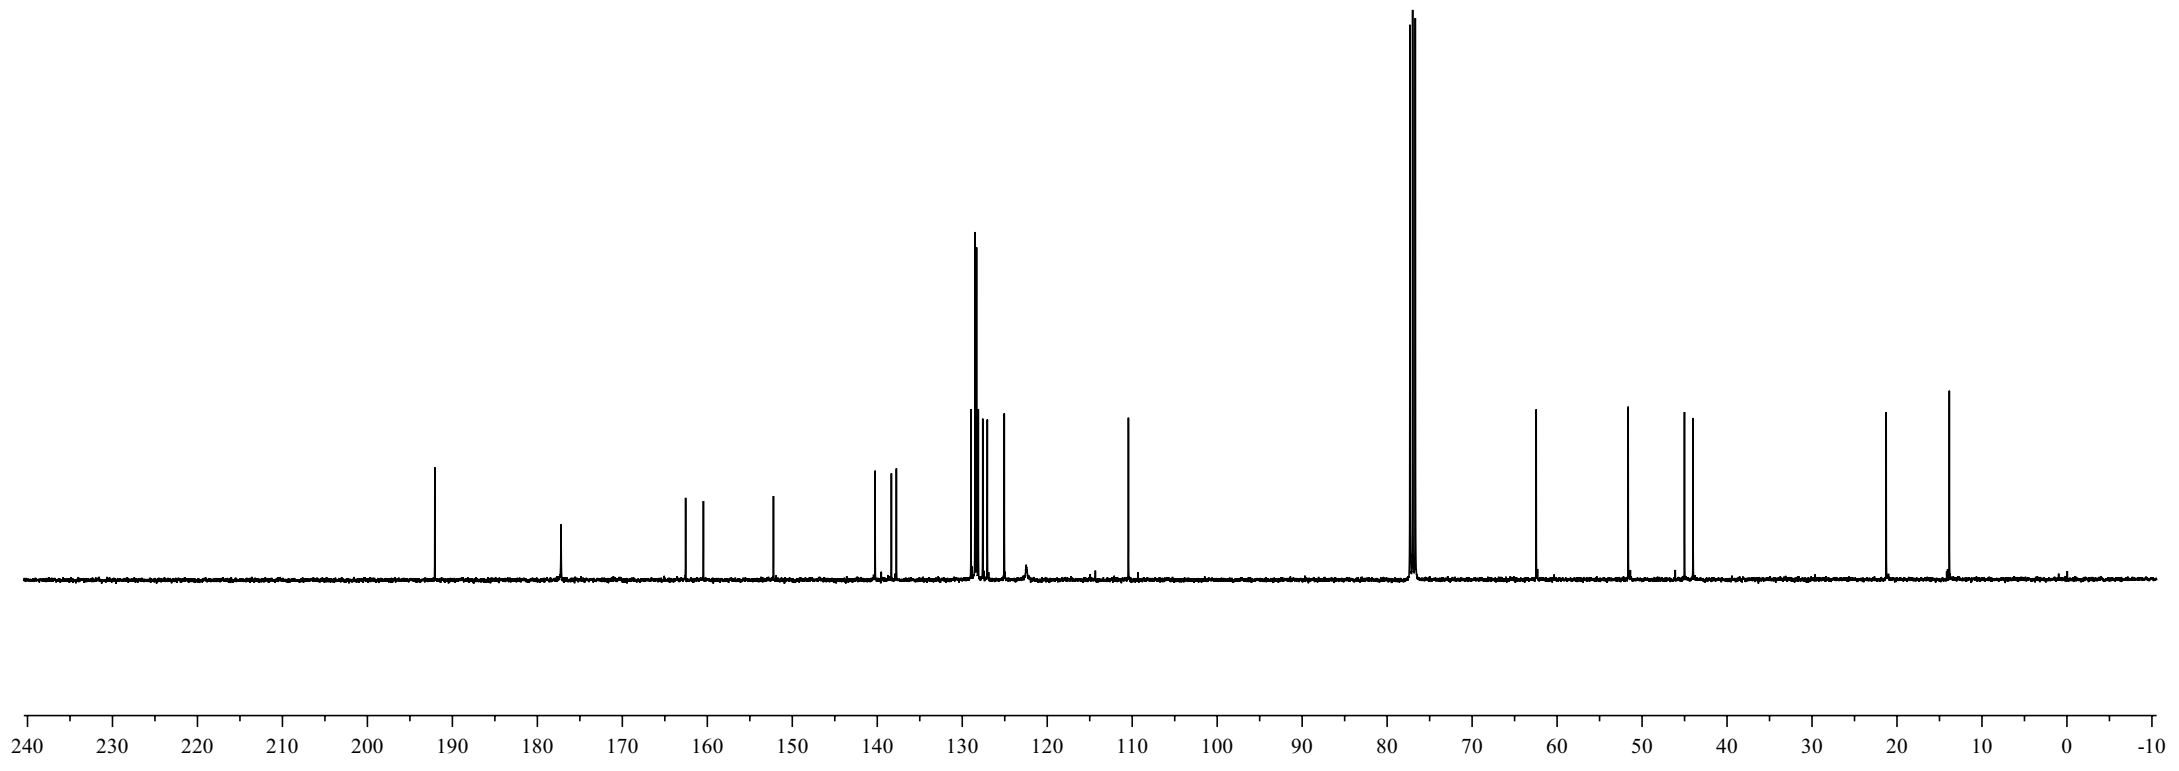

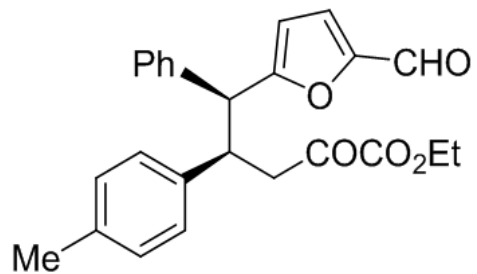

**4g**

9.335  
7.530  
7.528  
7.510  
7.392  
7.373  
7.354  
7.288  
7.270  
7.252  
7.248  
7.236  
7.227  
7.218  
6.996  
6.976  
6.502  
6.493

4.591  
4.561

4.078  
4.060  
4.043  
4.025

3.258  
3.215  
3.189  
2.777  
2.744  
2.735  
2.172

1.155  
1.137  
1.119

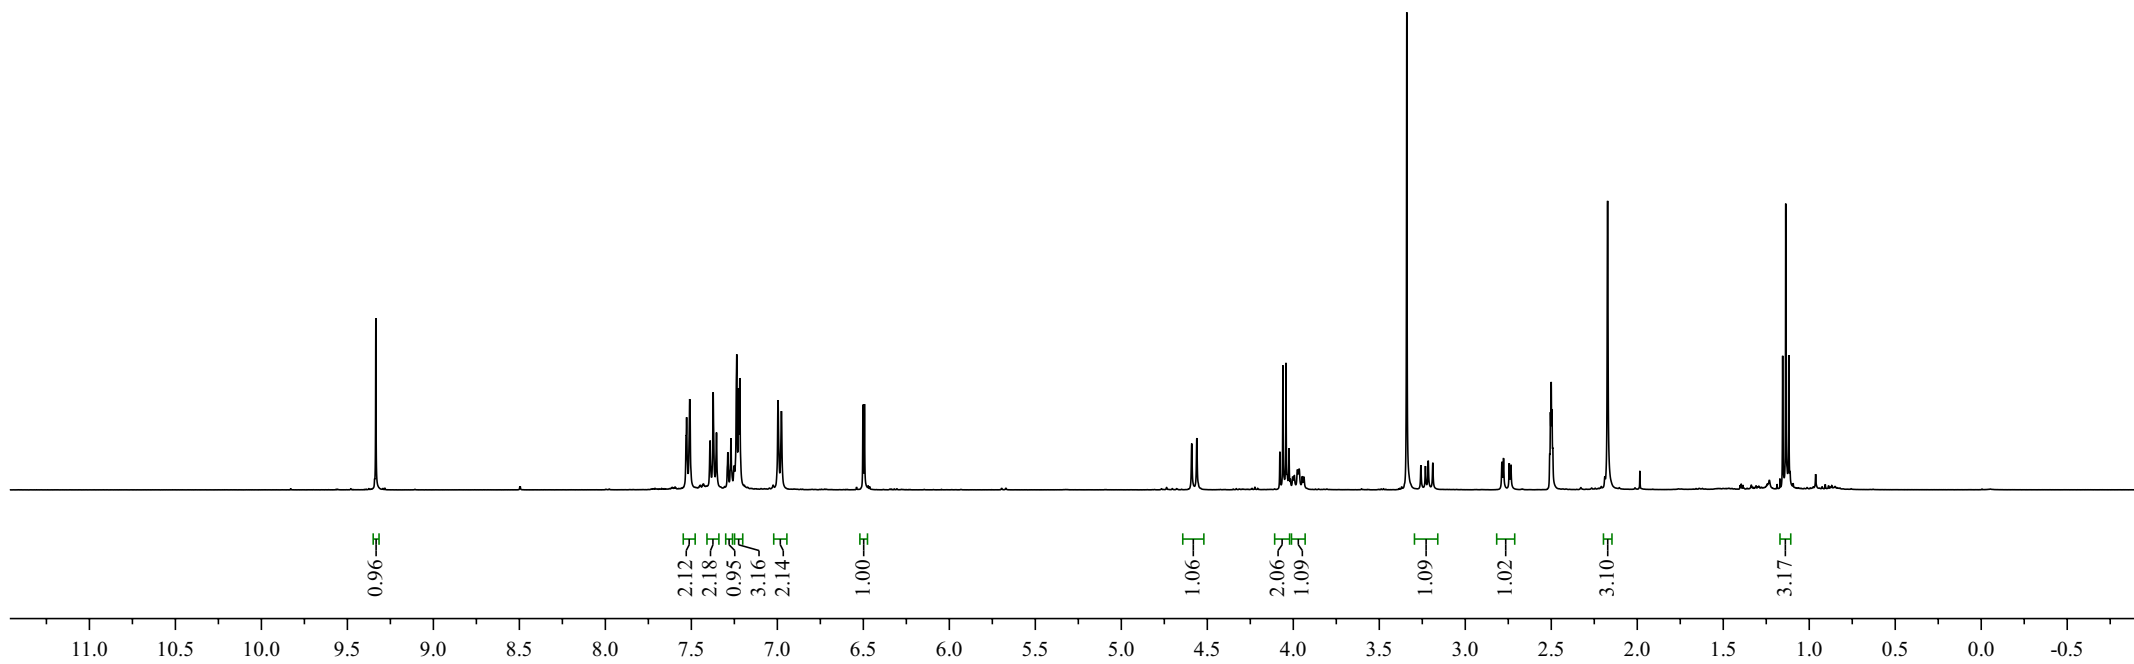



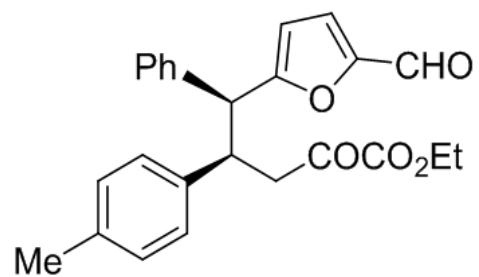

4g

— 192.278  
 — 177.369  
 — 162.829  
 — 159.962  
 — 151.024  
 — 139.635  
 — 138.634  
 — 135.525  
 — 128.873  
 — 128.697  
 — 128.438  
 — 127.920  
 — 127.378  
 — 109.983  
 — 61.668  
 — 50.449  
 — 43.868  
 — 43.580  
 — 20.544  
 — 13.656

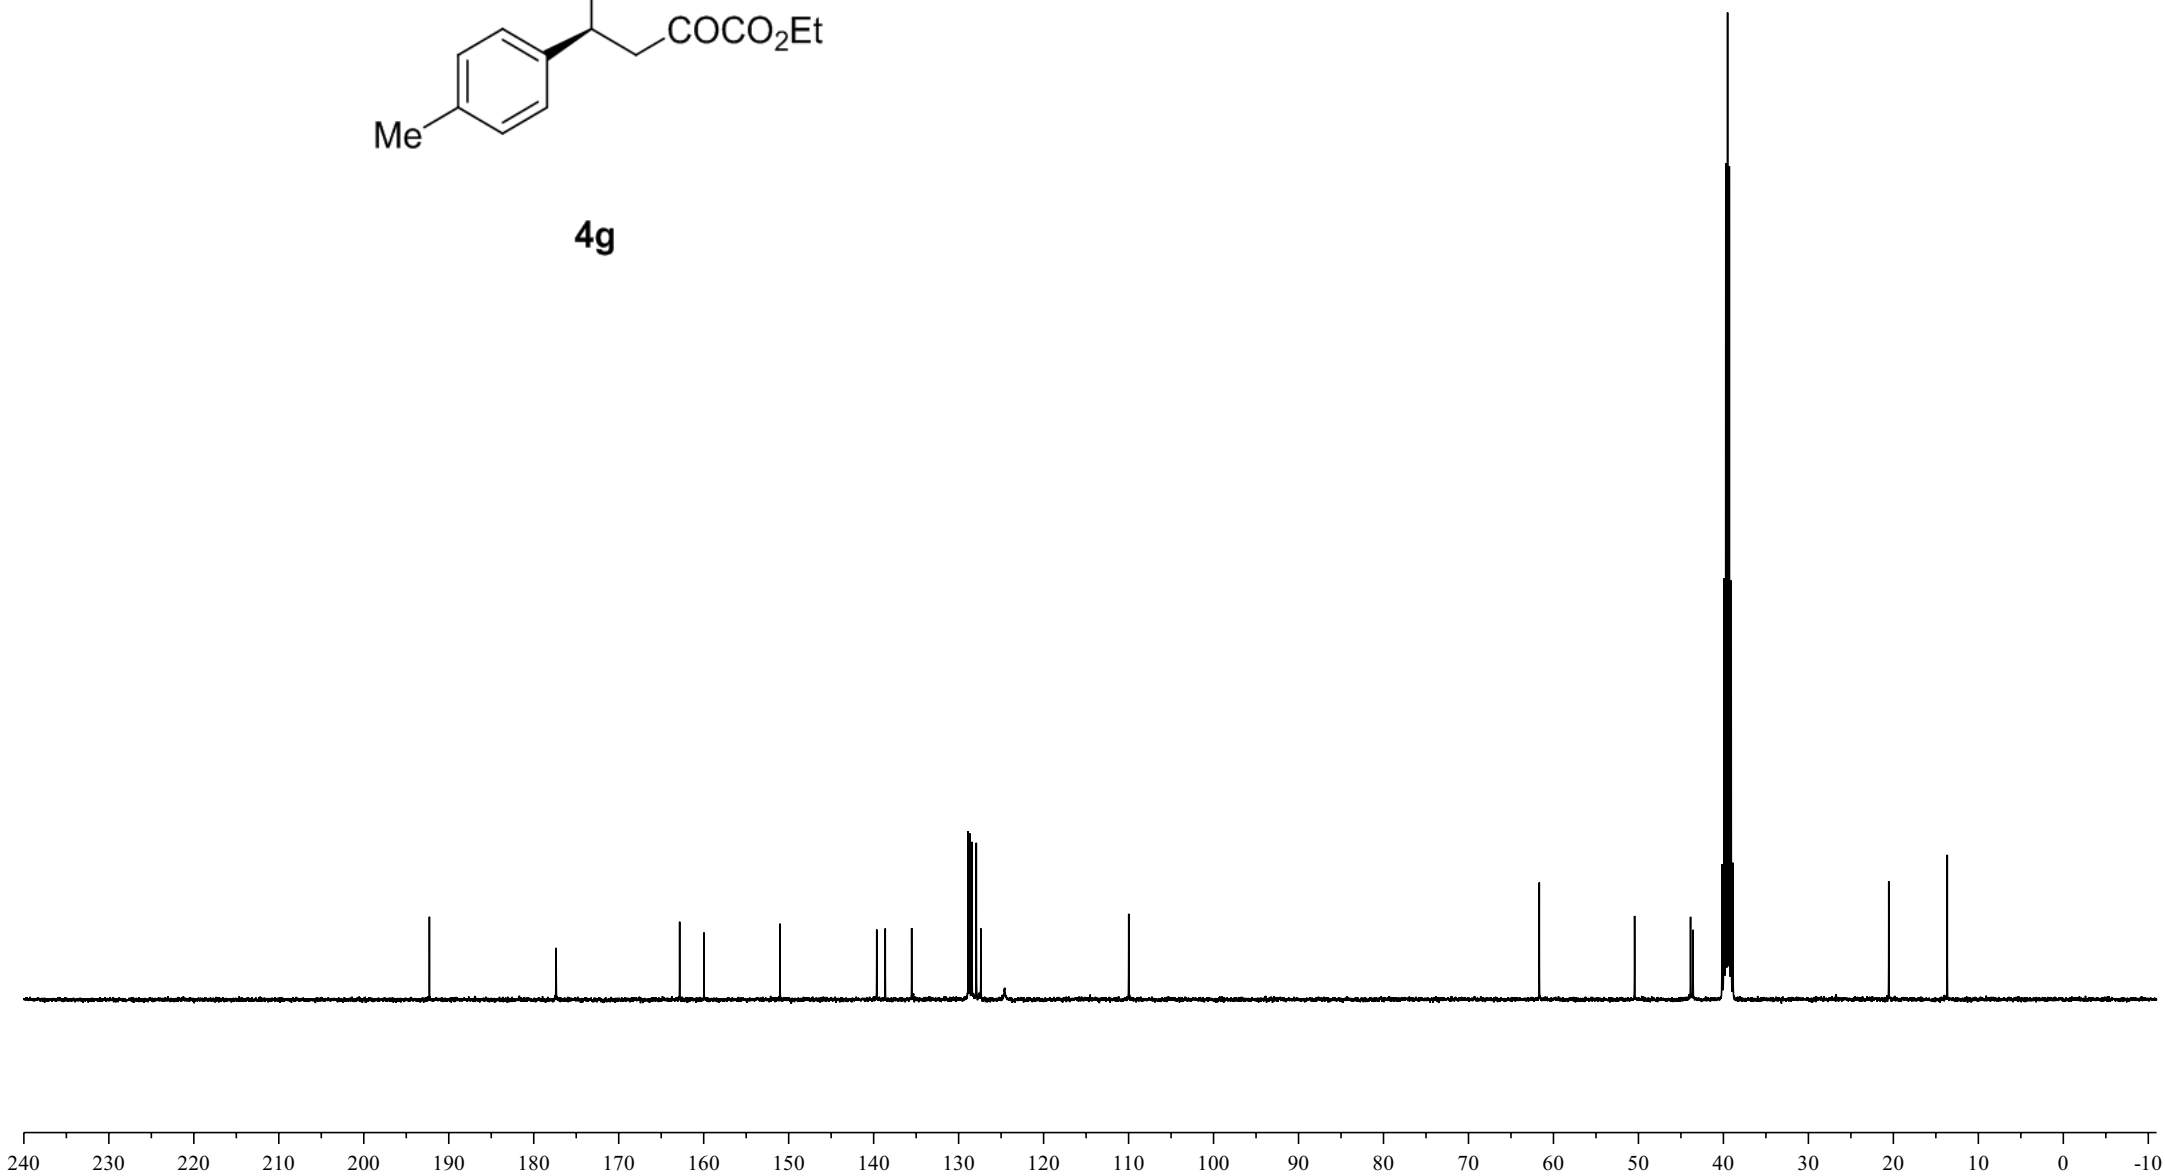

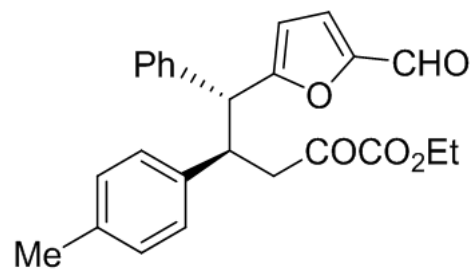

4g'

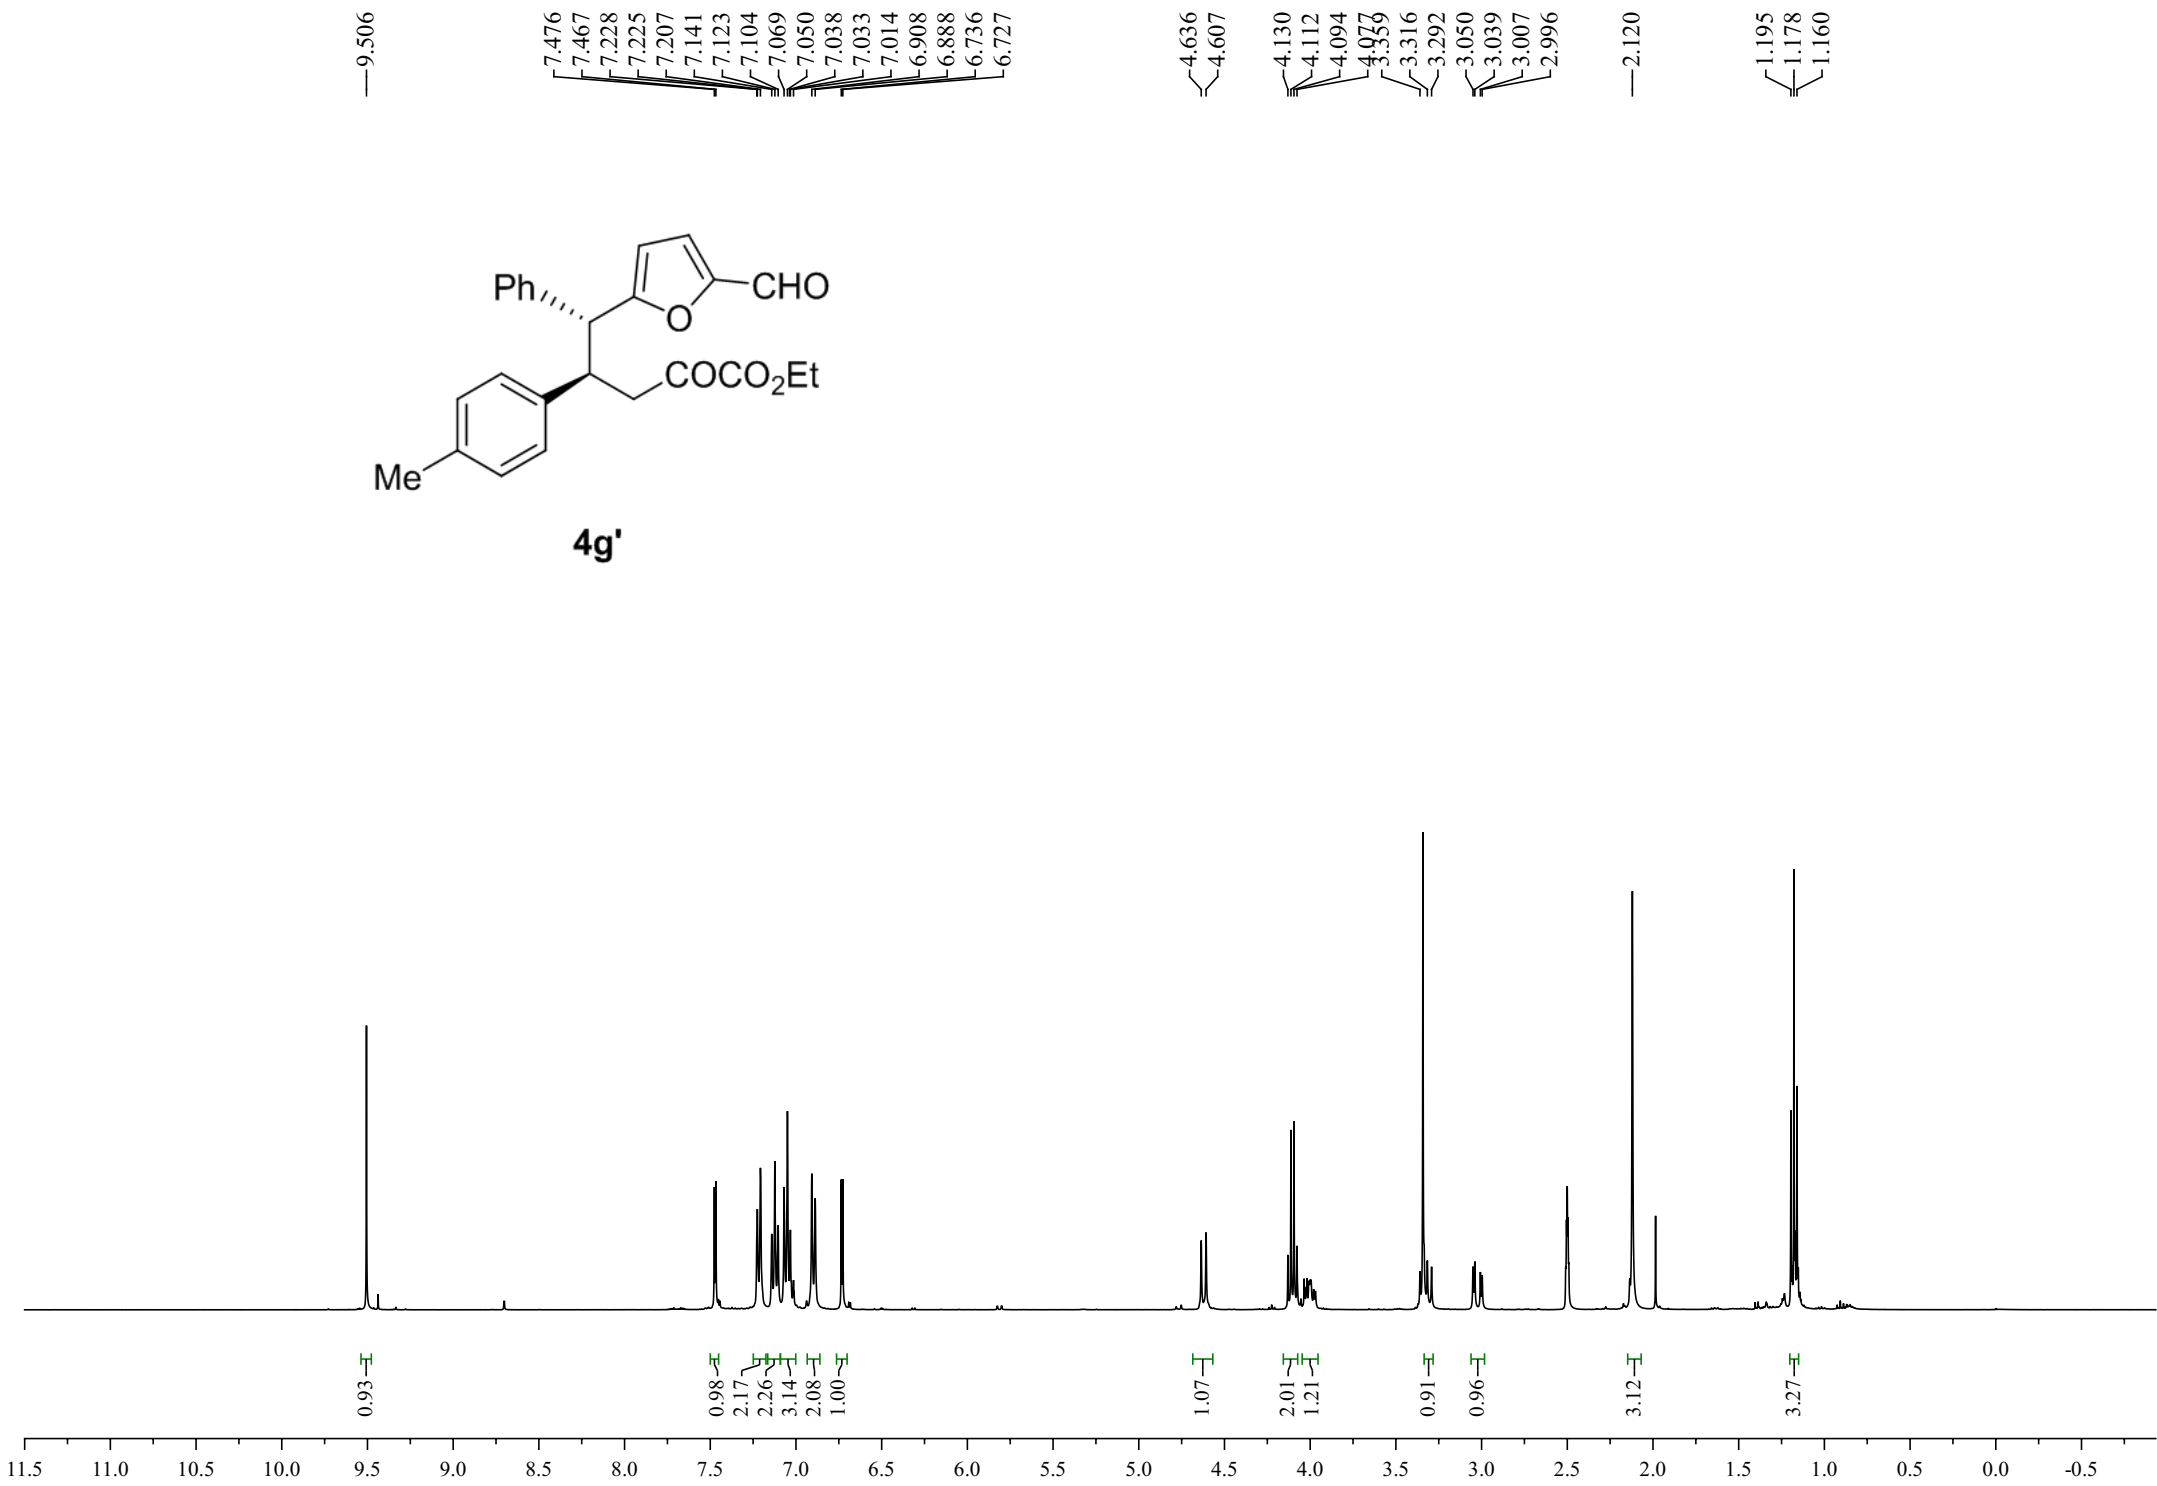

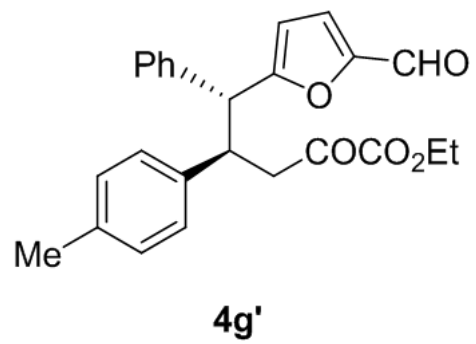

- 191.927
- 177.650
- 162.747
- 160.005
- 151.796
- 139.233
- 138.005
- 135.218
- 128.543
- 128.457
- 128.179
- 128.154
- 126.611
- 110.404
- 61.727
- 49.993
- 44.108
- 43.834
- 20.496
- 13.684

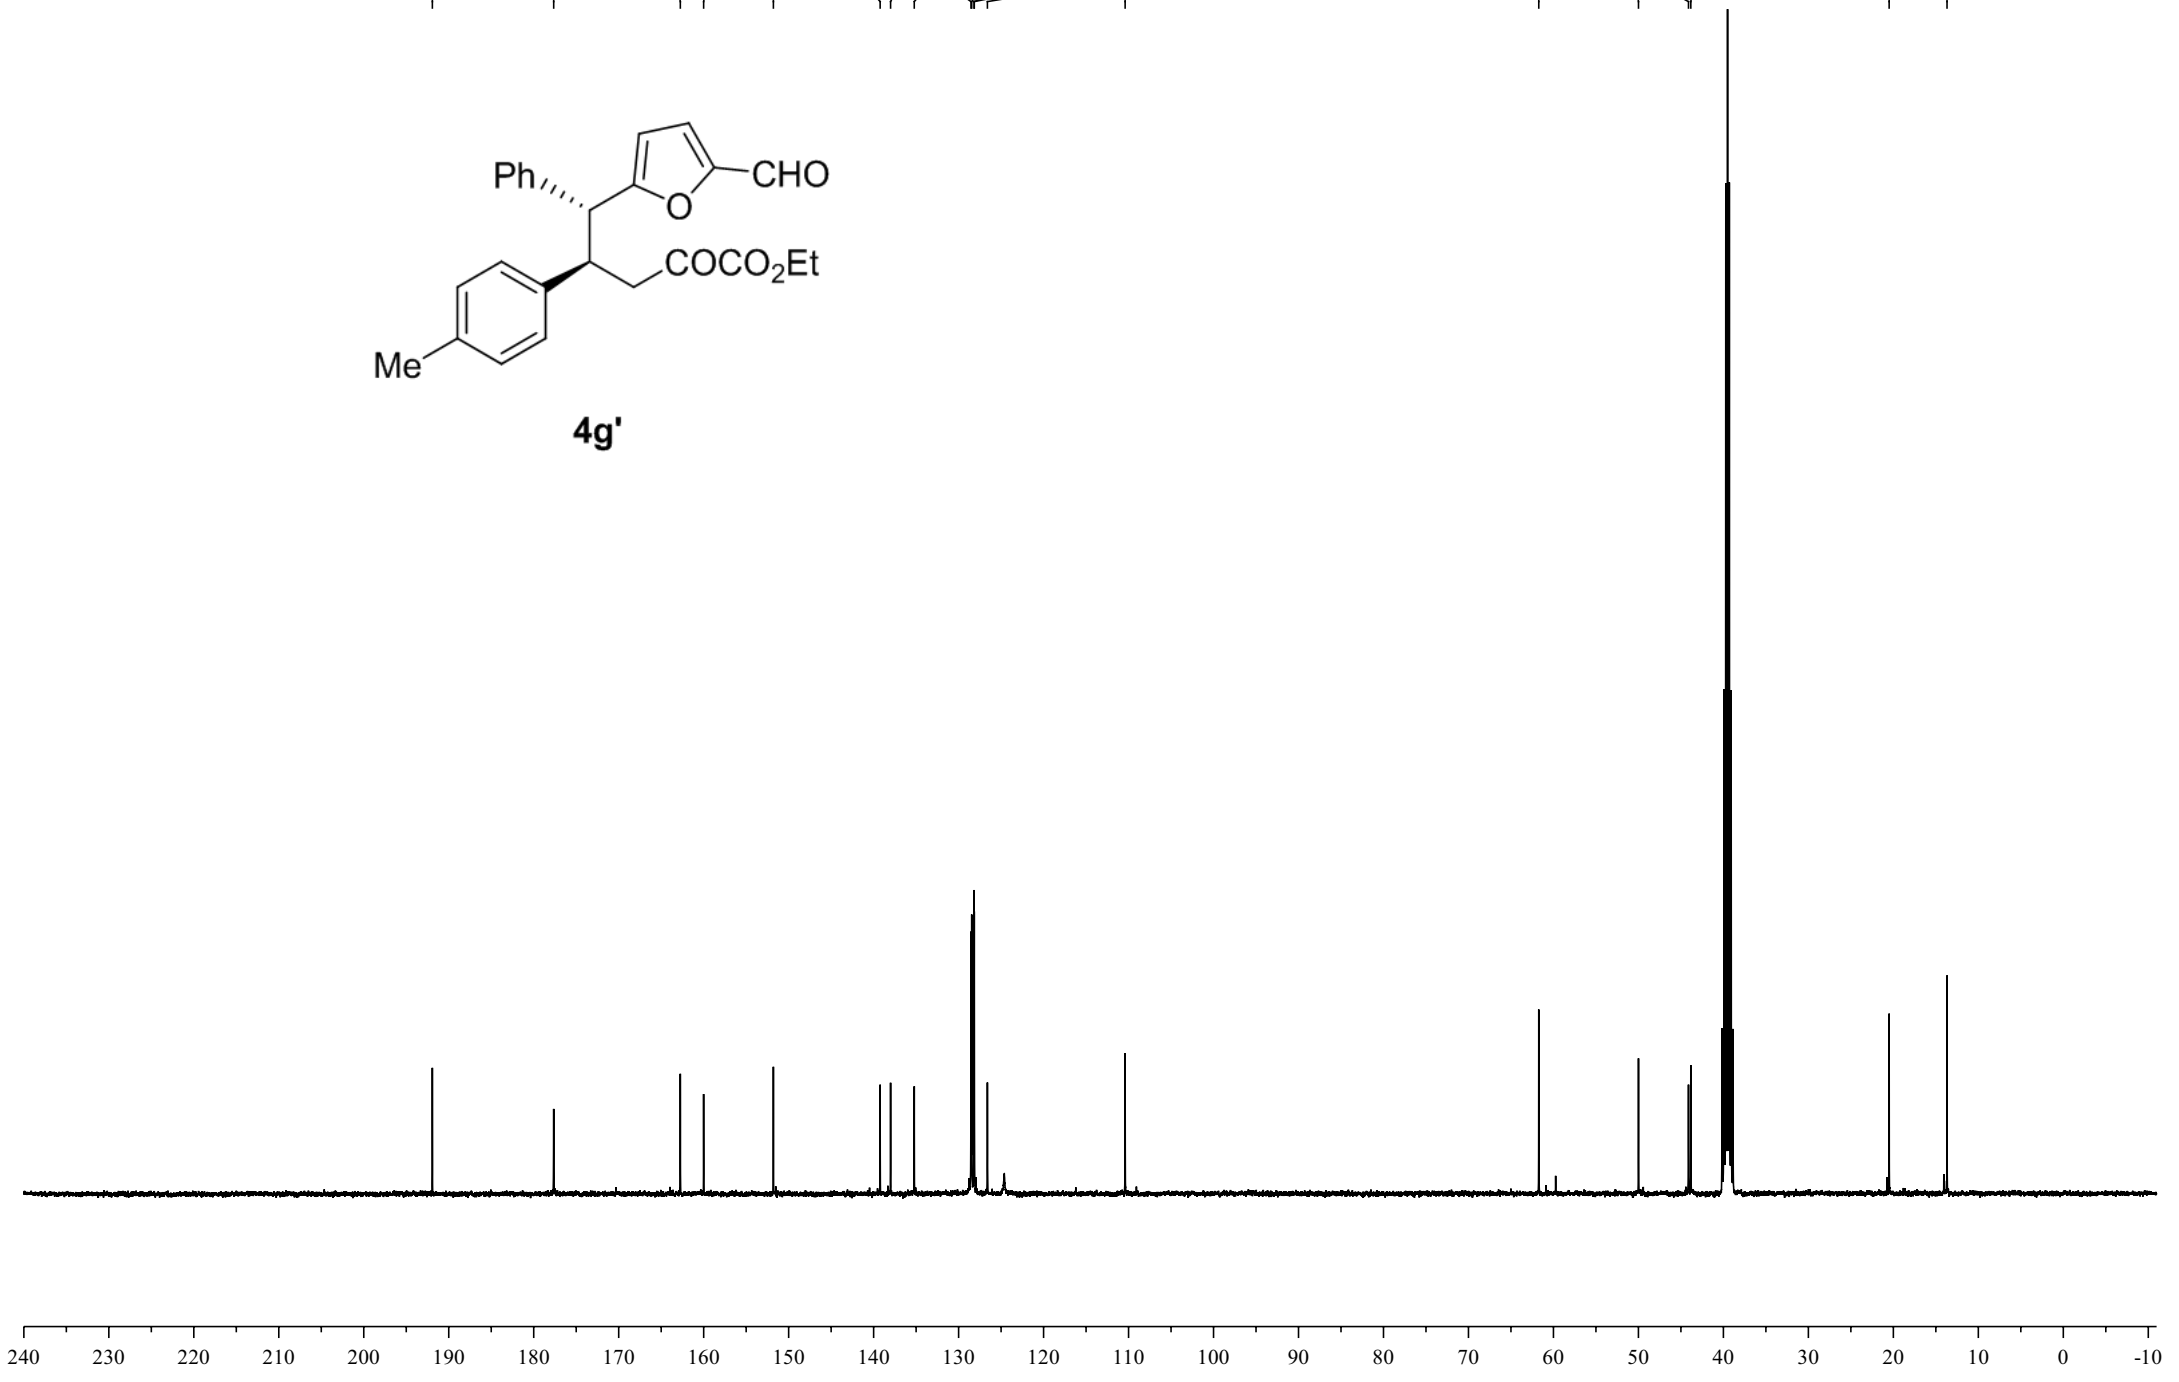

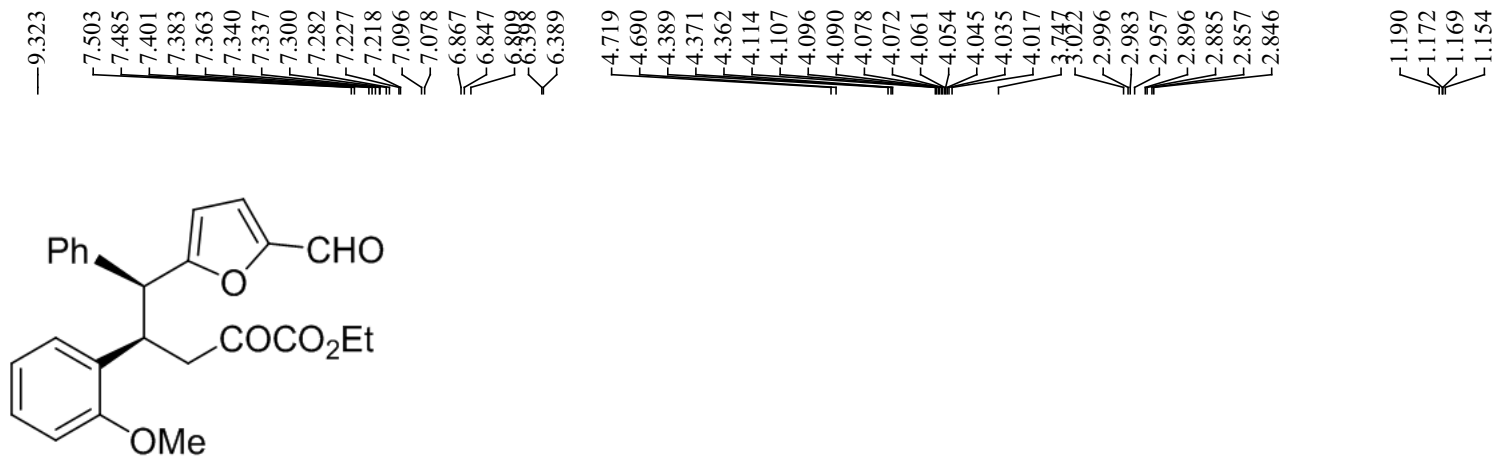

4h

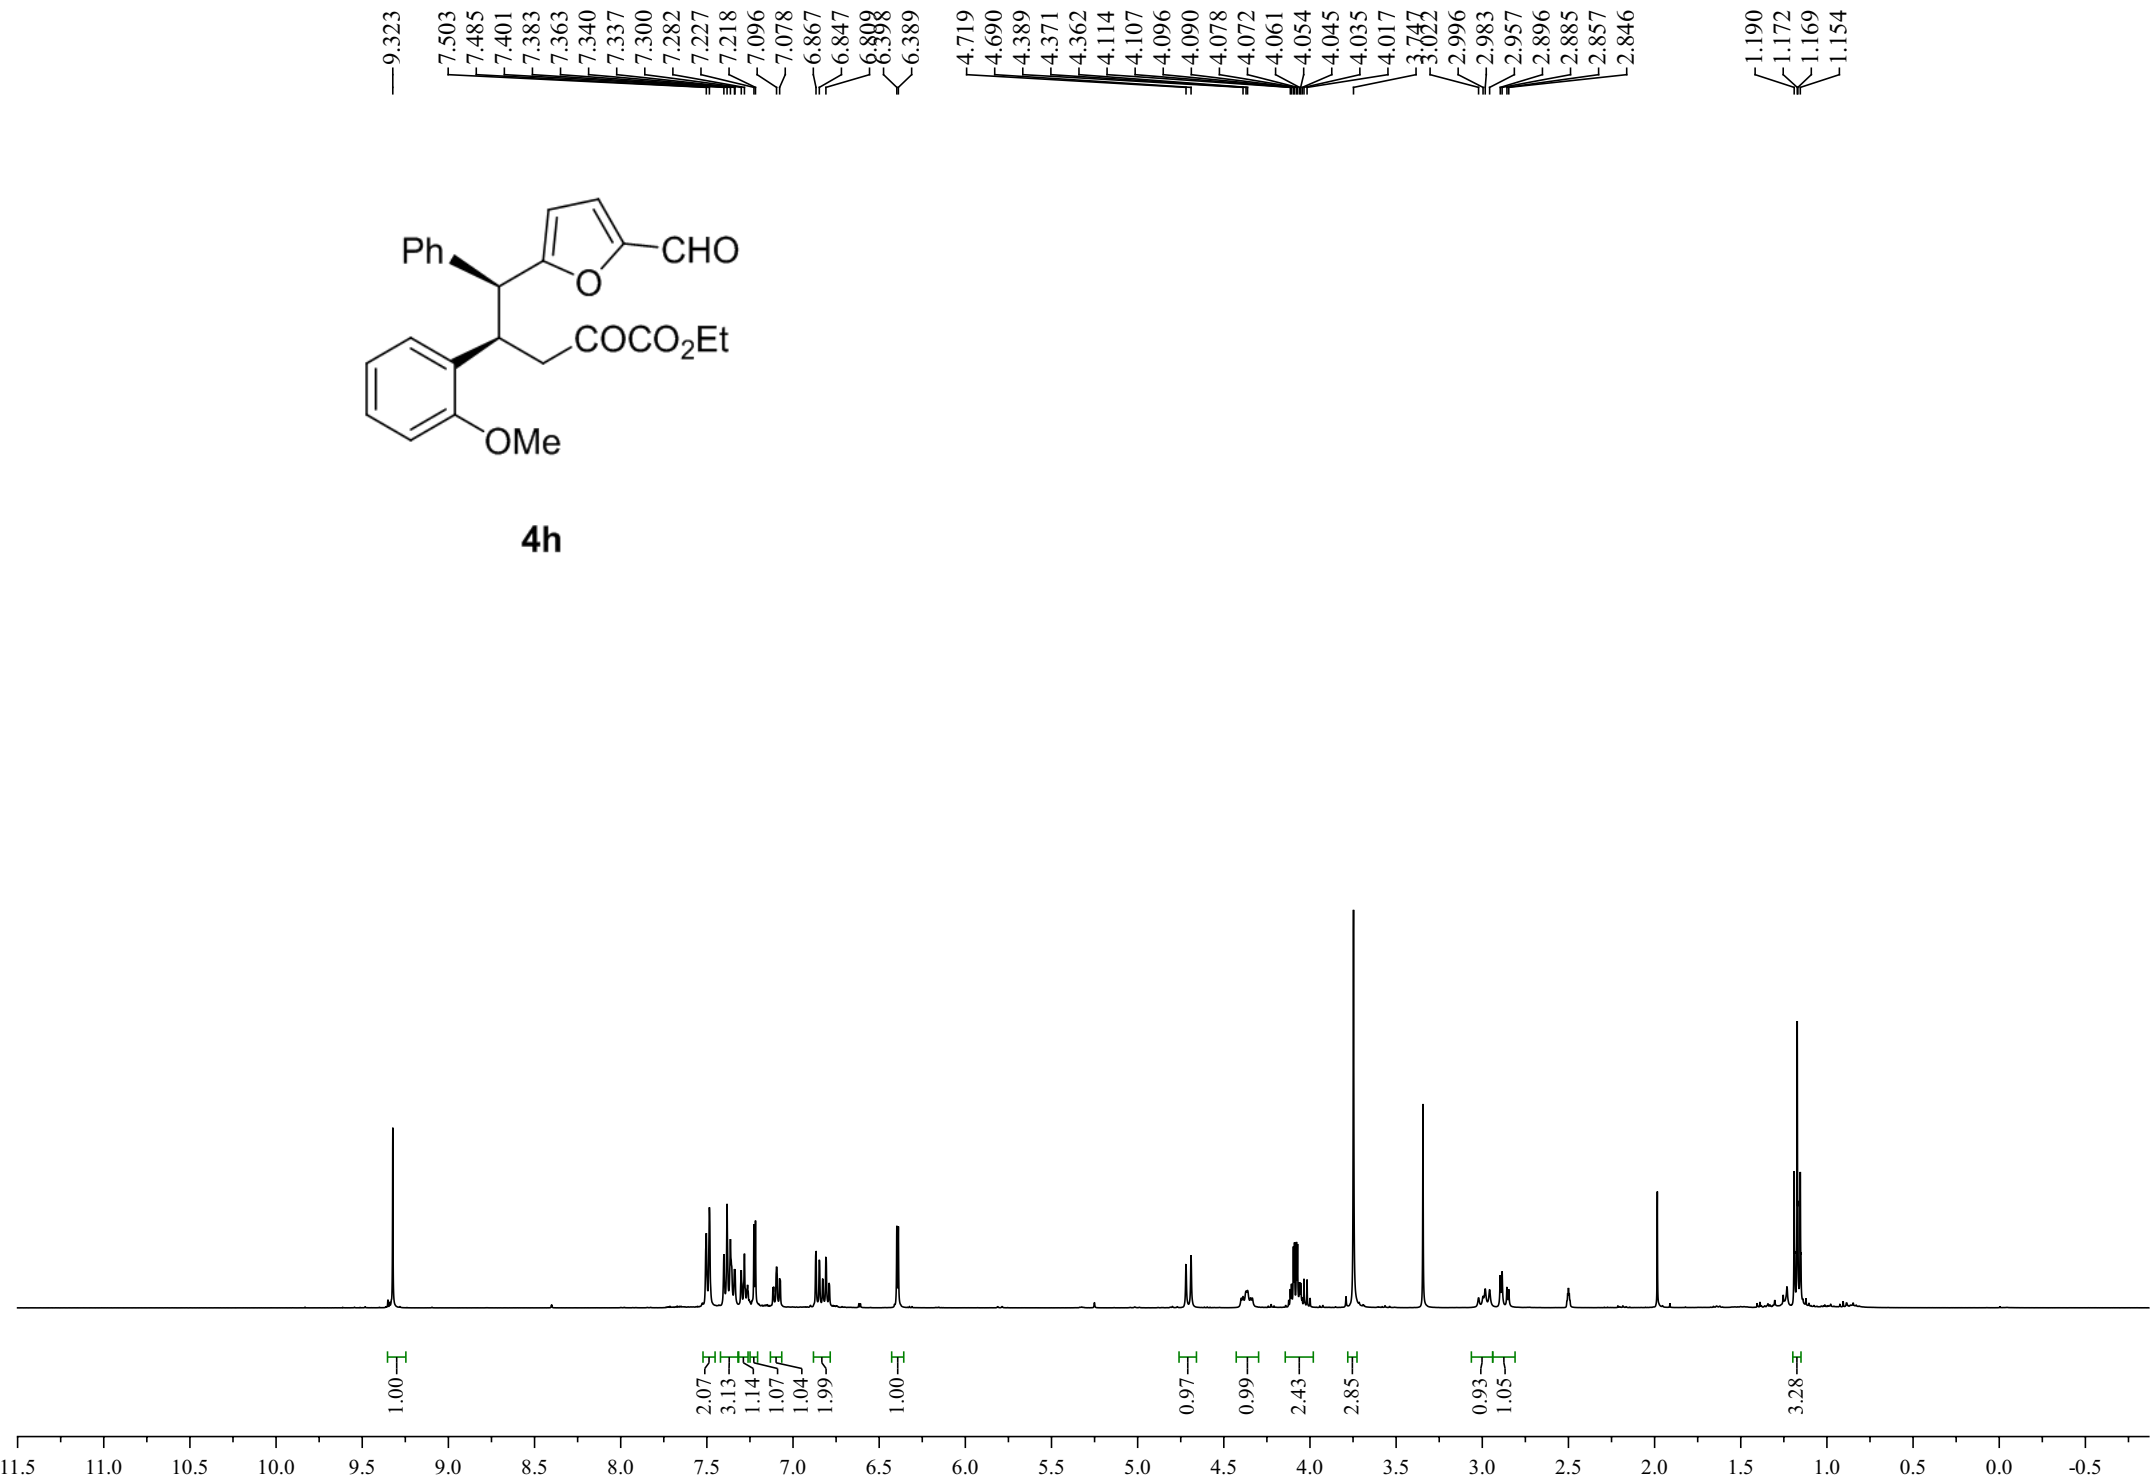

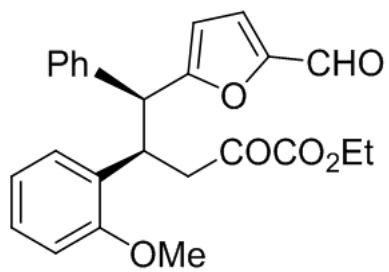

4h

—191.900

—177.292

~162.954

~159.726

~156.685

~151.155

—139.468

~128.821

~128.559

~127.920

~126.347

~110.997

~109.308

~61.581

~55.374

~49.097

~43.017

—20.723

—13.704

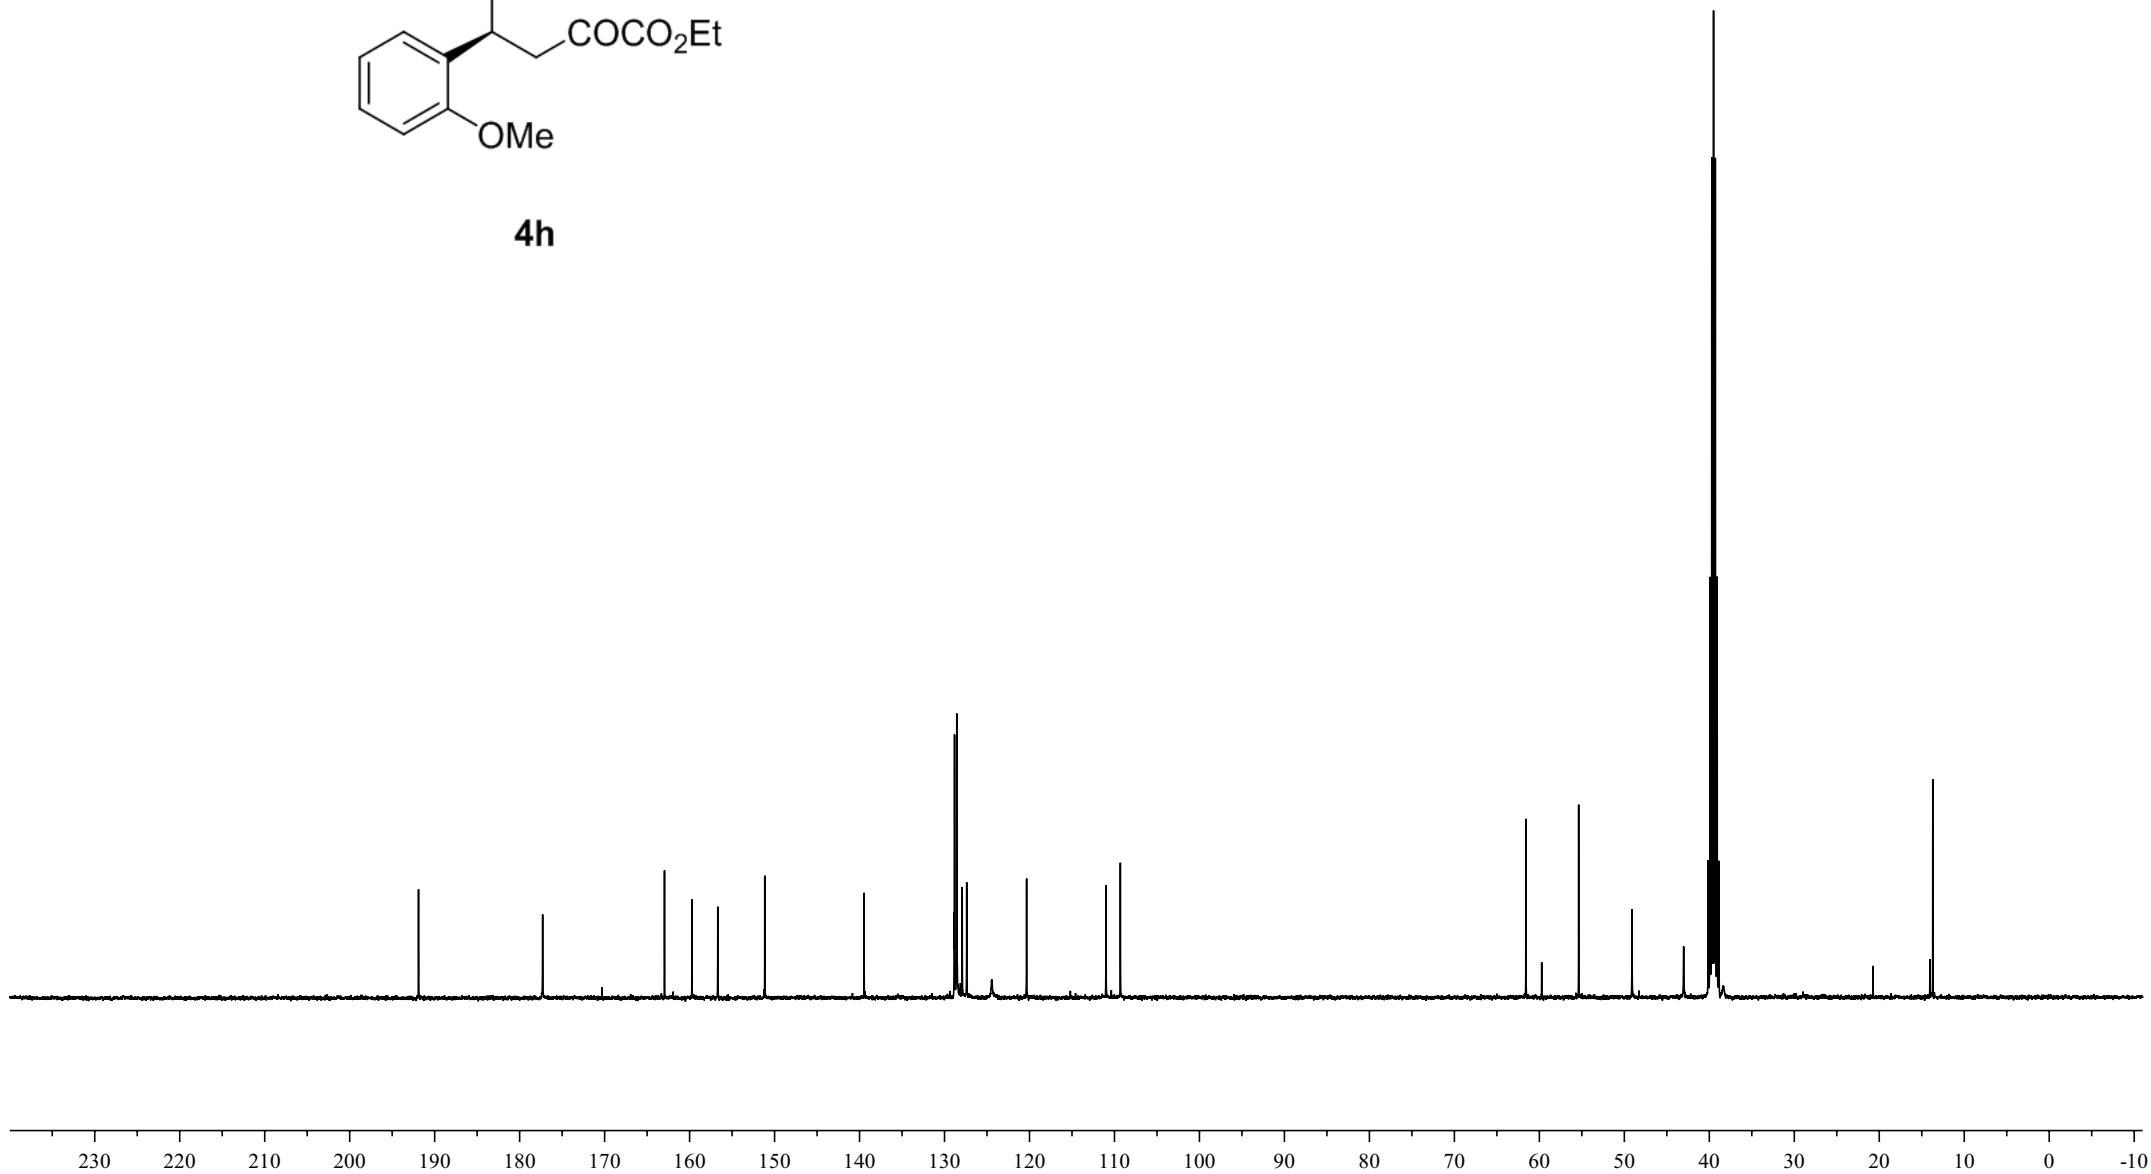

9.511  
 7.485  
 7.479  
 7.203  
 7.201  
 7.189  
 7.188  
 7.185  
 7.172  
 7.170  
 7.114  
 7.102  
 7.089  
 7.017  
 7.014  
 7.002  
 7.001  
 7.000  
 6.998  
 6.755  
 6.749  
 6.738  
 6.713  
 6.712  
 4.732  
 4.713  
 4.406  
 4.401  
 4.149  
 4.144  
 4.138  
 4.132  
 4.126  
 4.120  
 4.114  
 4.108  
 3.196  
 3.179  
 3.169  
 3.153  
 3.100  
 3.092  
 3.073  
 3.066  
 1.218  
 1.206  
 1.194

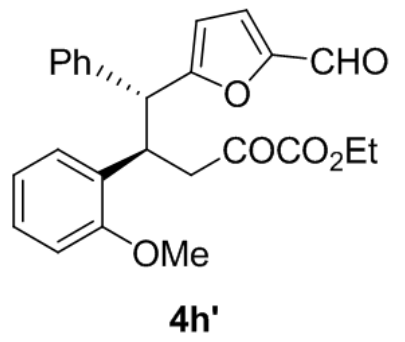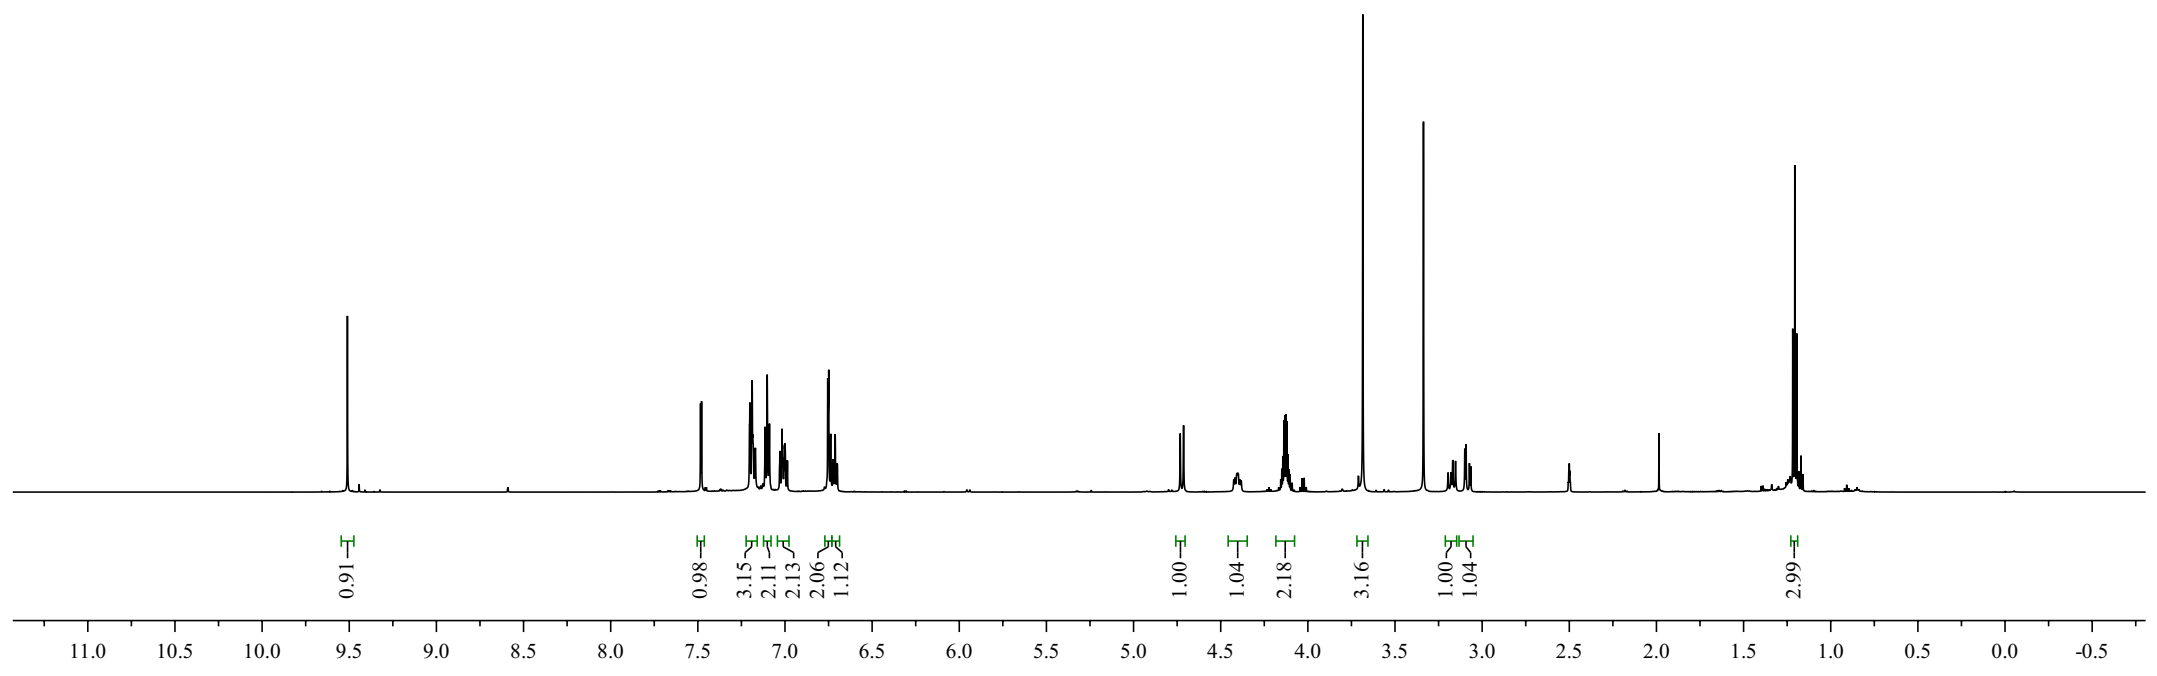

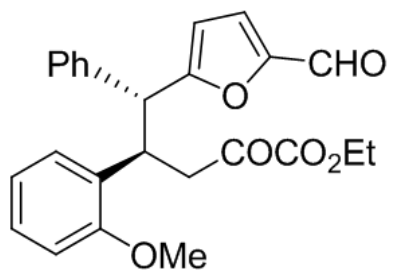

4h'

—192.215

—178.147

~163.312

~160.353

~157.187

~152.332

—139.817

129.440

128.881

128.610

128.470

128.198

127.057

120.622

111.324

110.866

62.156

55.705

49.275

43.799

—14.220

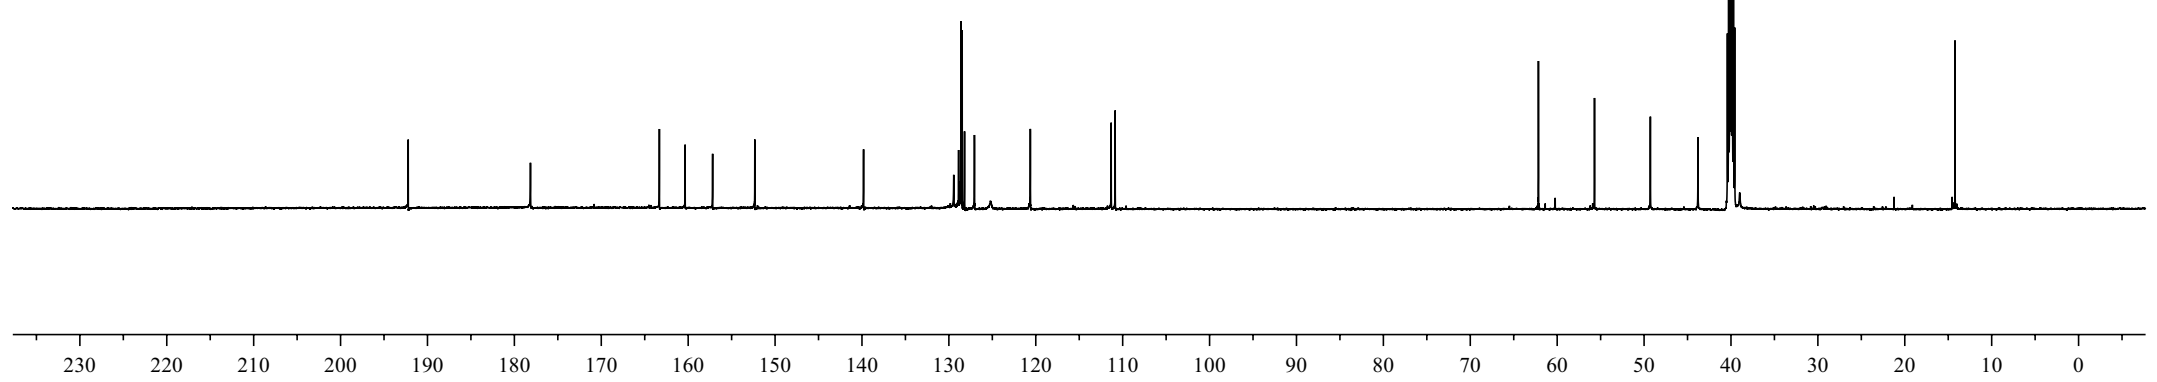

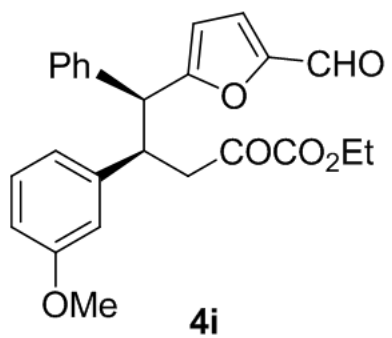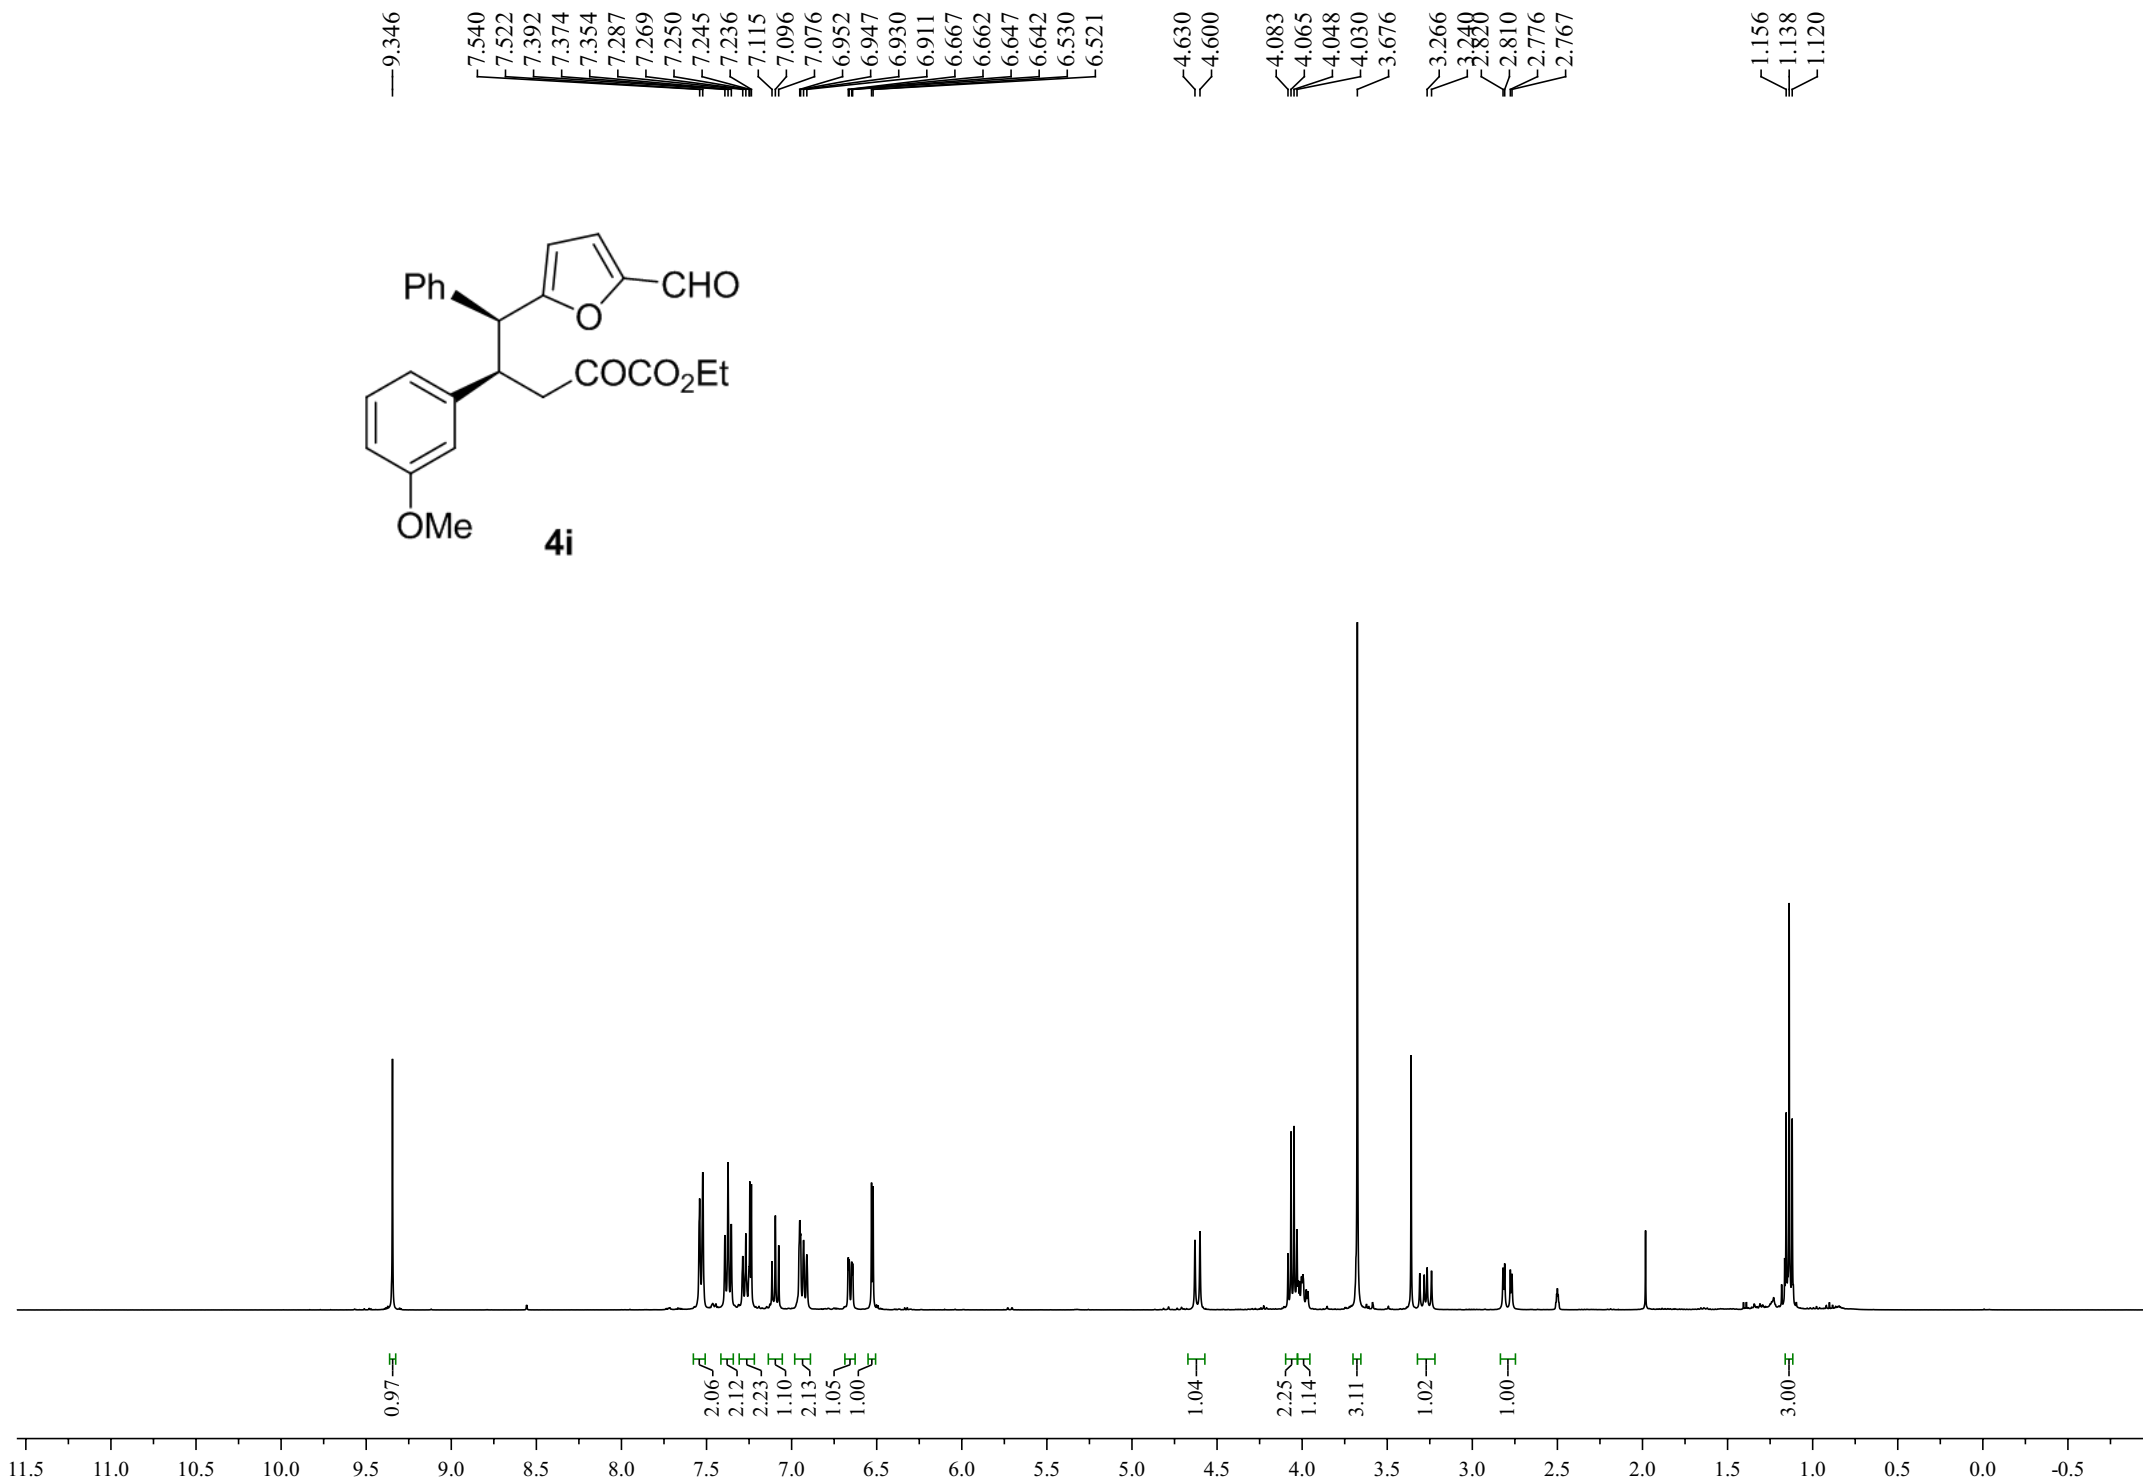



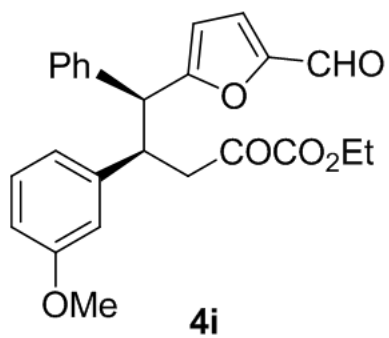

— 192.192  
— 177.375  
— 162.756  
— 159.960  
— 158.953  
— 151.061  
— 143.361  
— 139.567  
— 129.075  
— 128.876  
— 128.480  
— 127.403  
— 120.308  
— 113.937  
— 111.917  
— 110.035

— 61.683  
— 54.863  
— 50.309  
— 44.307  
— 43.363

— 13.652

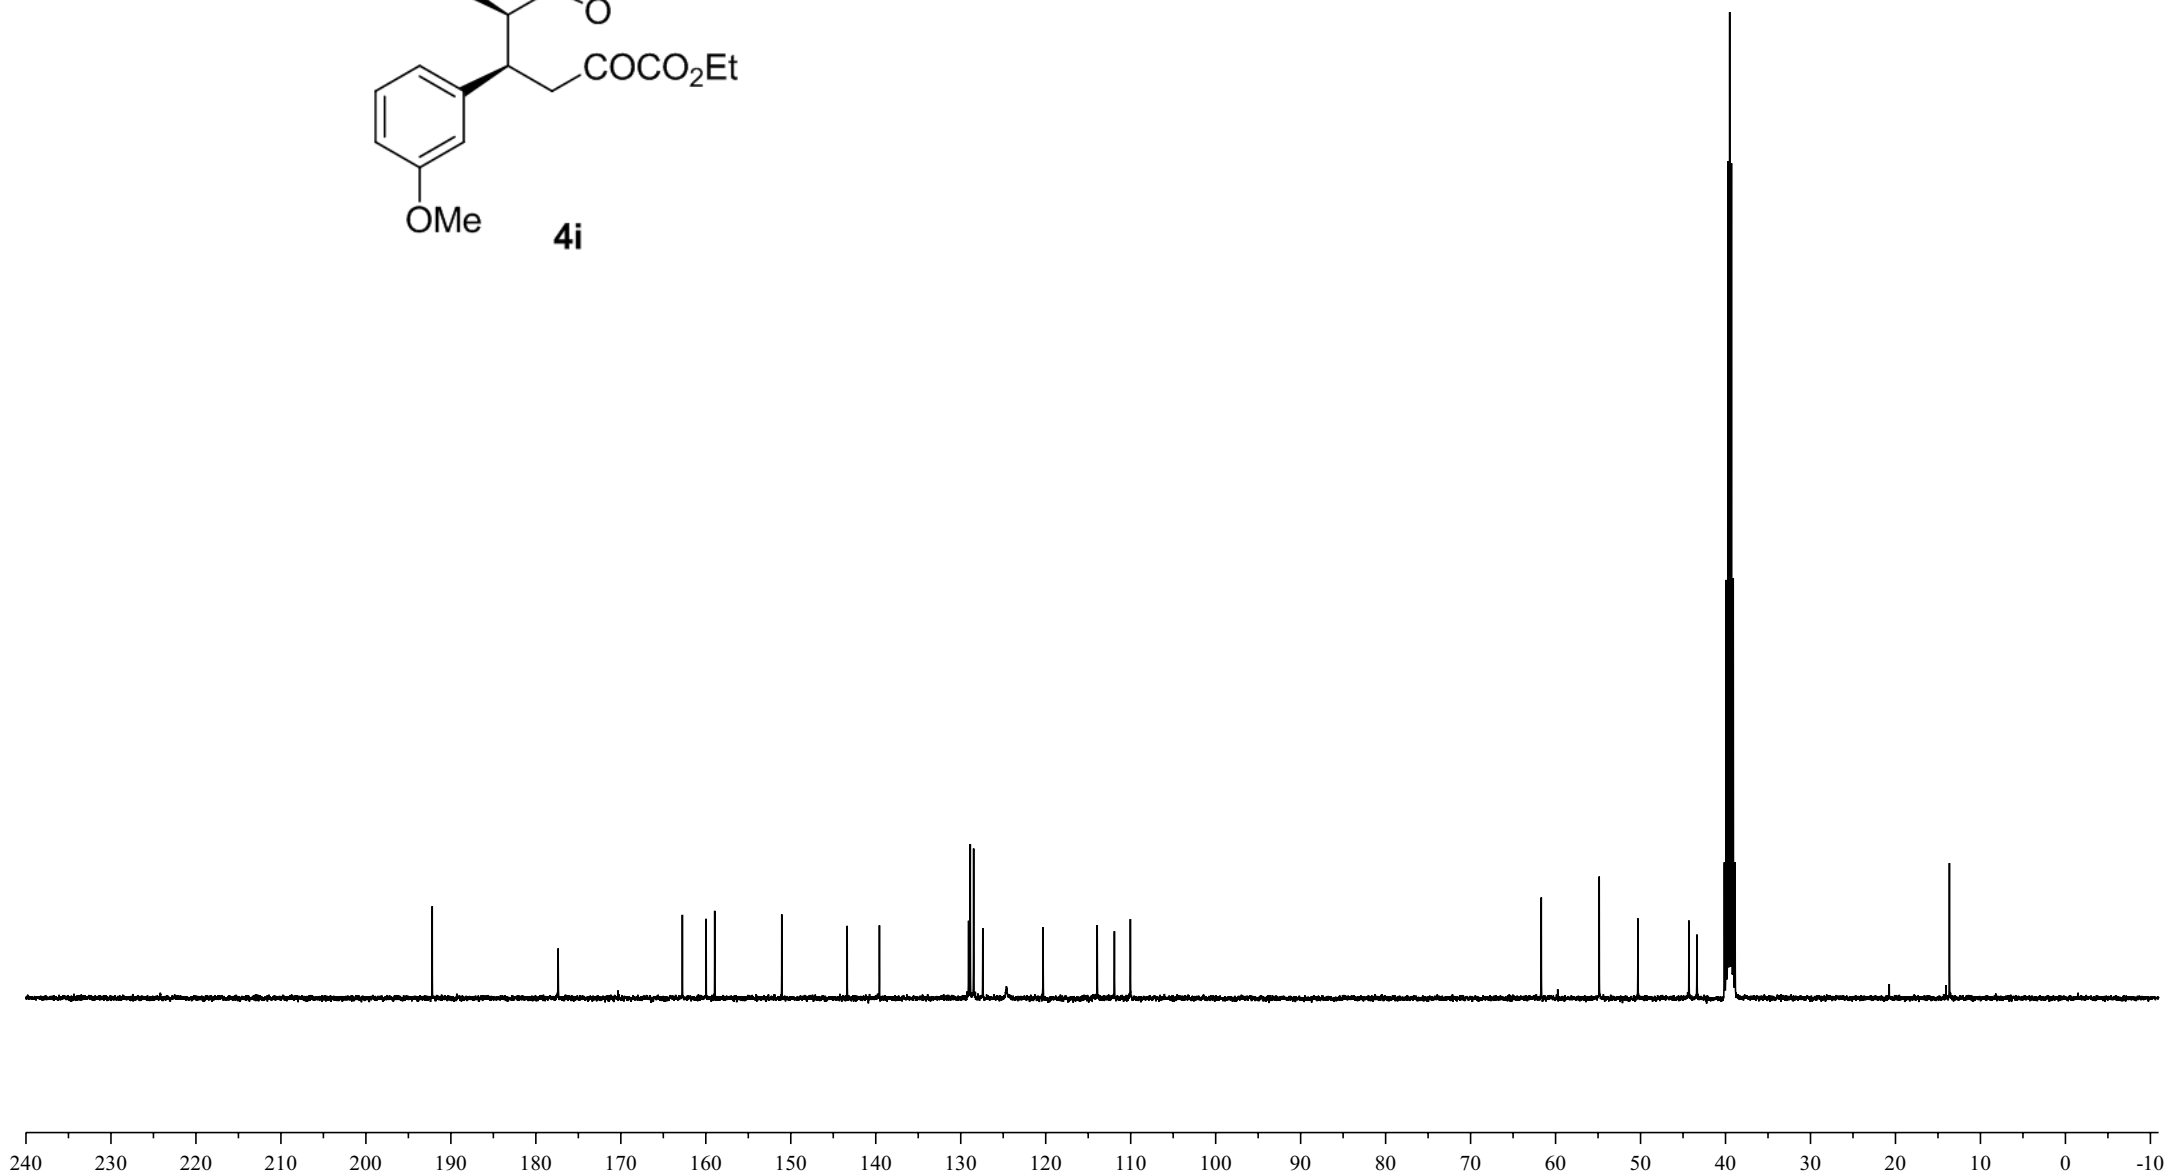

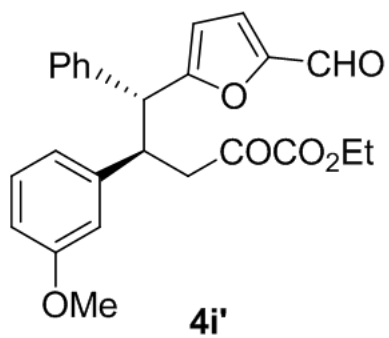

— 9.513  
 7.475  
 7.469  
 7.247  
 7.234  
 7.142  
 7.130  
 7.117  
 7.053  
 7.041  
 7.029  
 7.014  
 7.001  
 6.988  
 6.786  
 6.754  
 6.742  
 6.736  
 6.580  
 6.577  
 6.566  
 6.563

4.674  
 4.655  
 4.130  
 4.118  
 4.107  
 4.095  
 3.622  
 3.397  
 3.381  
 3.368  
 3.363  
 3.353  
 3.080  
 3.073  
 3.051  
 3.044

1.193  
 1.181  
 1.169

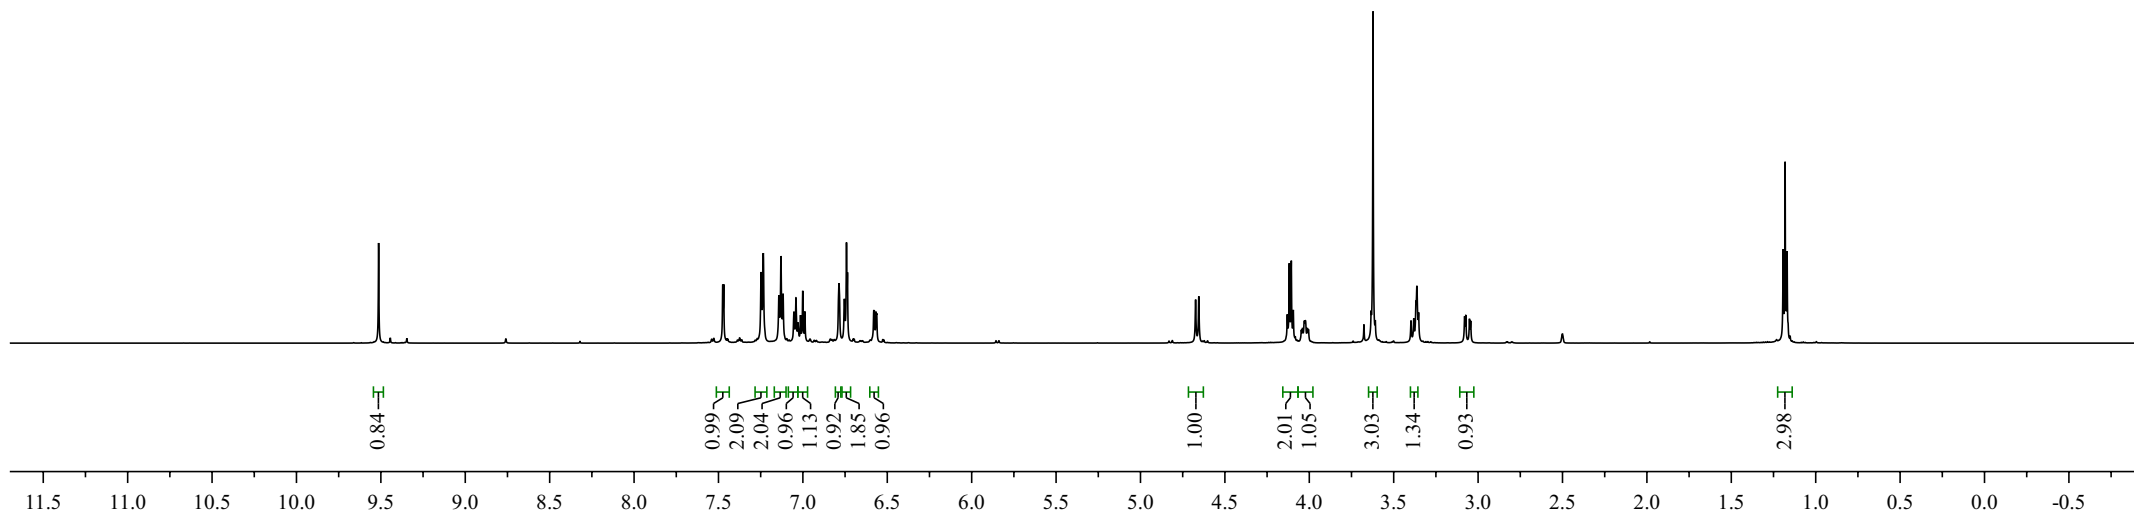

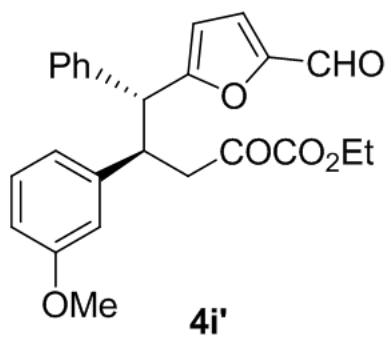

— 191.844  
— 177.646  
— 162.666  
— 160.004  
— 158.807  
— 151.806  
— 142.675  
— 139.164  
— 128.870  
— 128.474  
— 128.152  
— 126.618  
— 120.625  
— 114.072  
— 111.743  
— 110.434

— 61.742  
— 54.787  
— 49.869  
— 44.271  
— 43.882

— 13.674

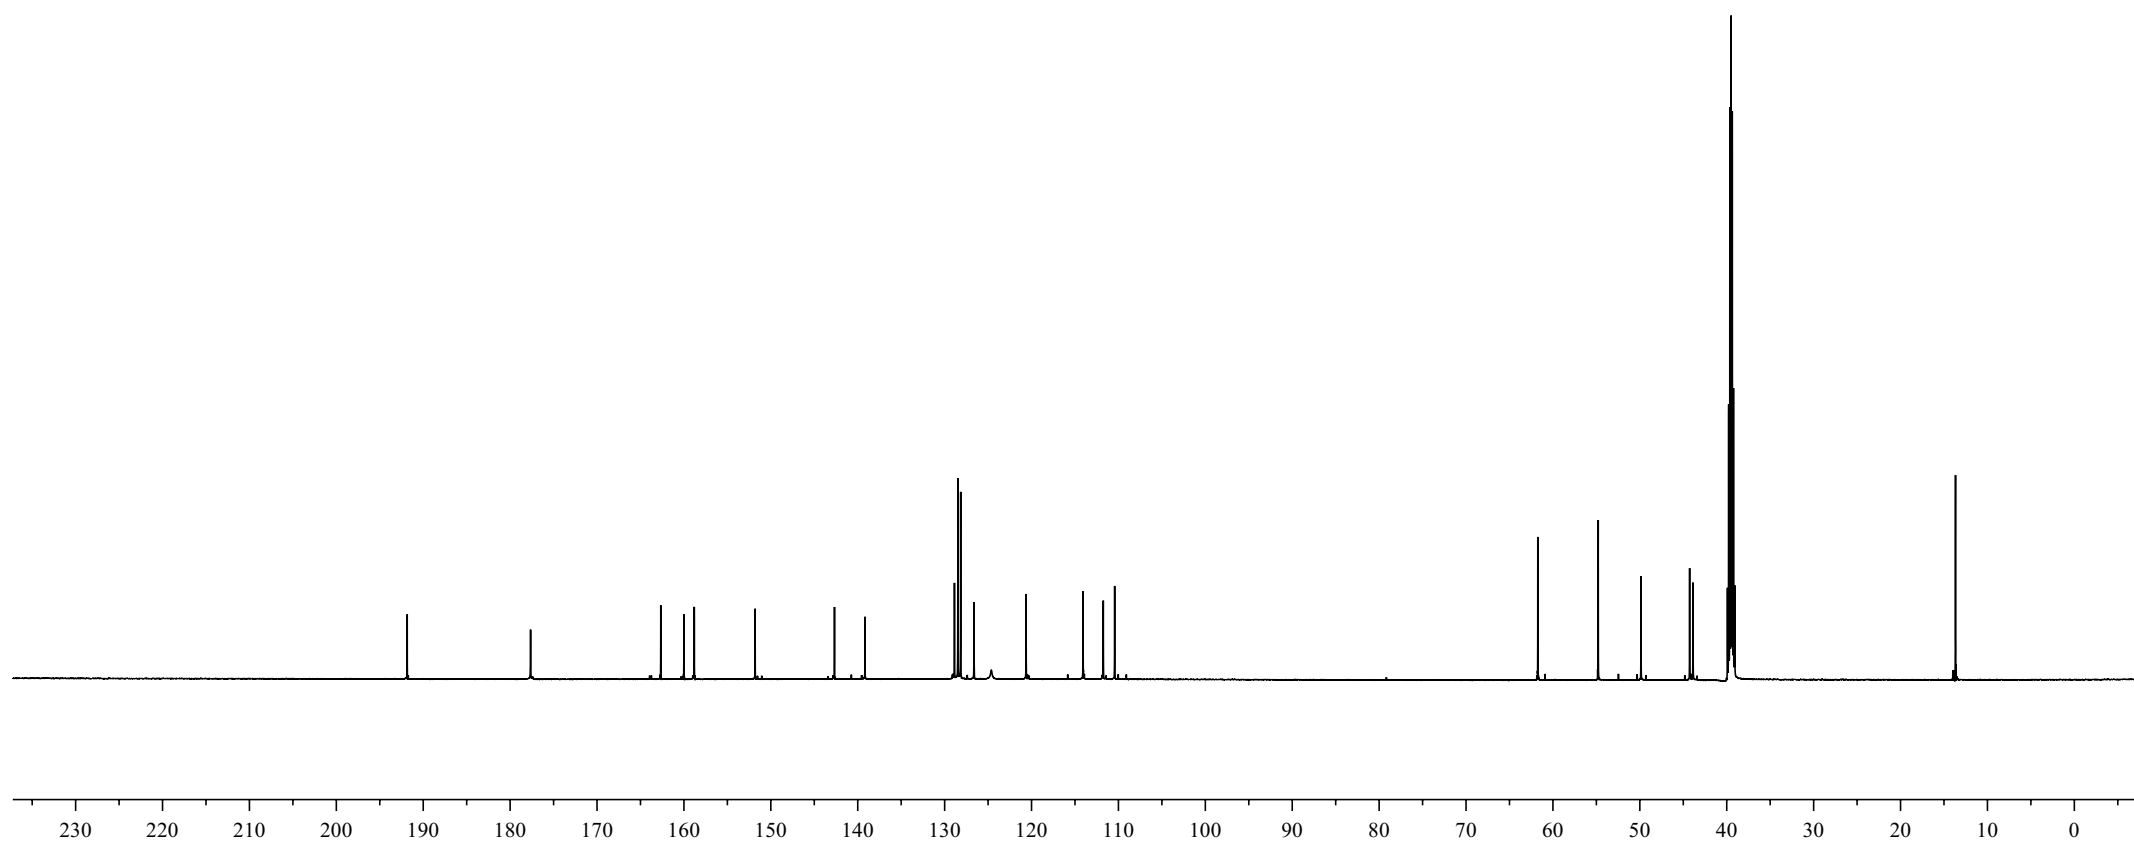

9.339  
7.529  
7.511  
7.391  
7.373  
7.354  
7.287  
7.284  
7.275  
7.269  
7.253  
7.245  
7.236  
6.761  
6.754  
6.732  
6.509  
6.500

4.577  
4.548

4.081  
4.063  
4.046  
4.028  
3.651

3.216  
3.189  
3.174  
2.765  
2.732  
2.722

1.156  
1.138  
1.121

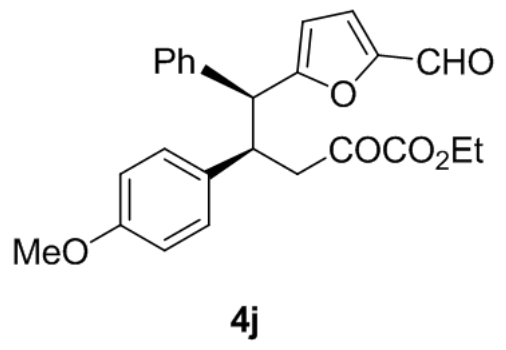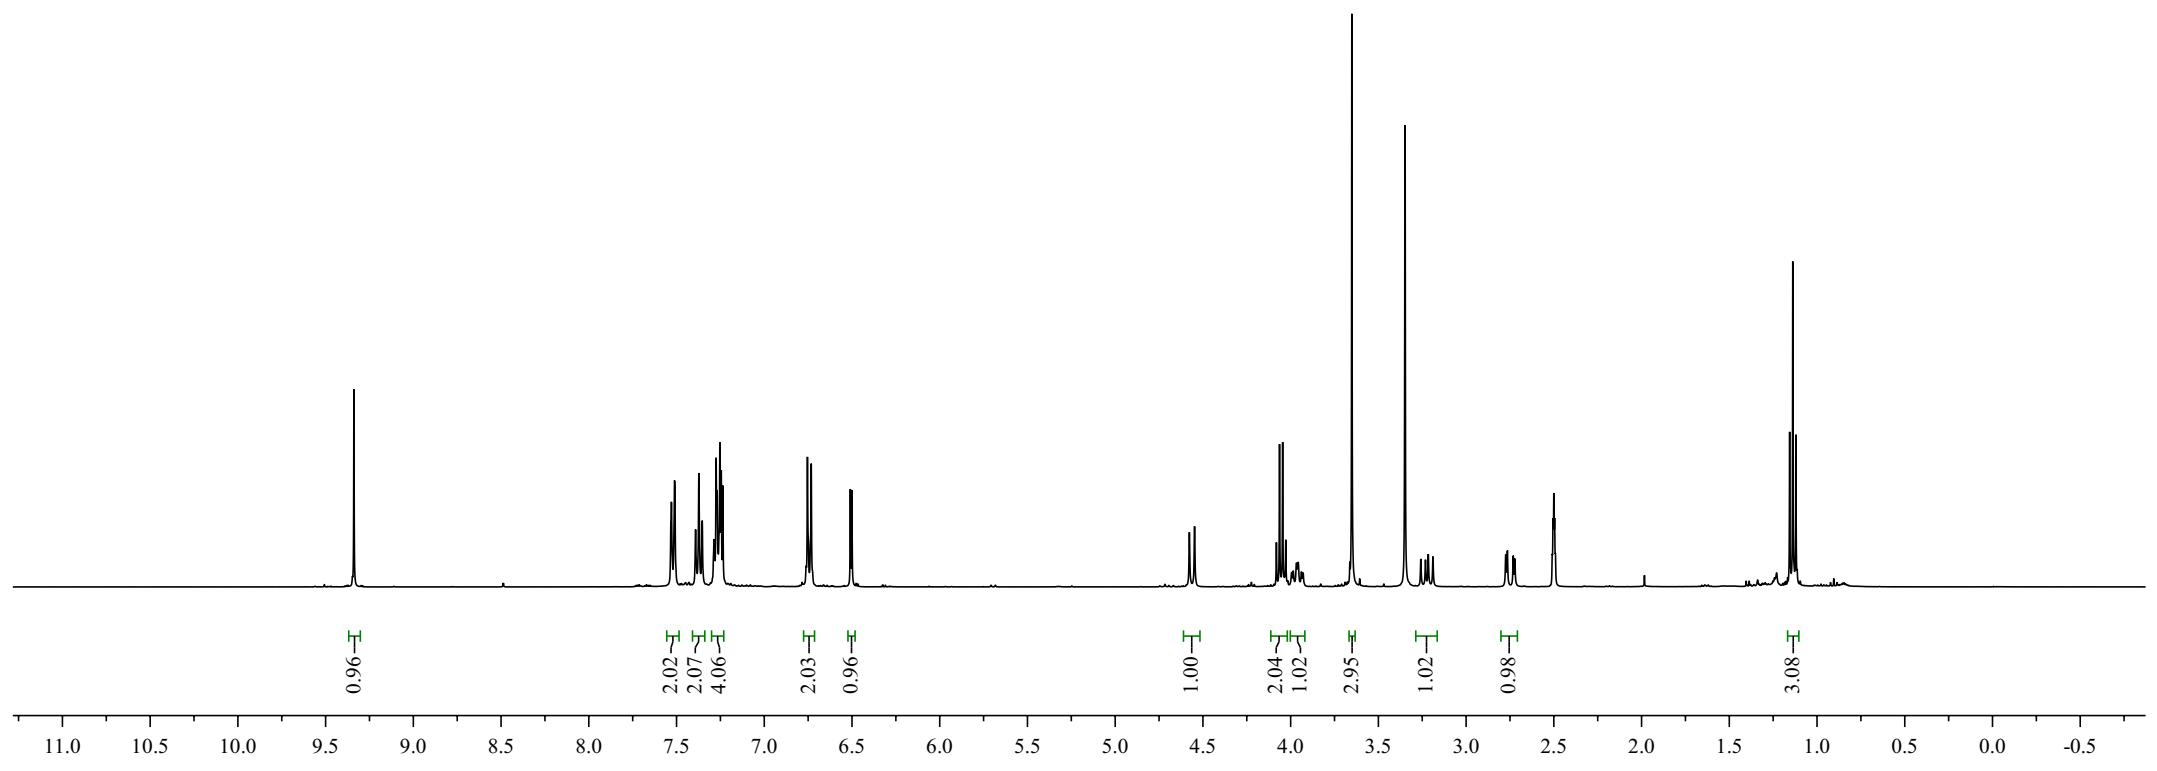

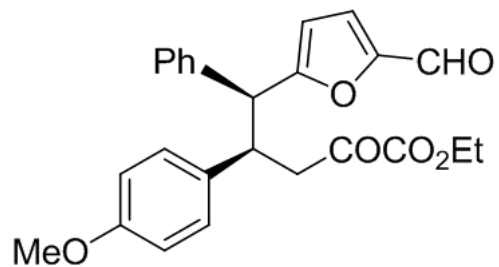

4j

— 192.385

— 177.349

~ 162.916

~ 159.985

~ 157.716

— 151.021

~ 139.679

~ 133.442

~ 129.075

~ 128.861

~ 128.418

~ 127.357

— 113.421

— 109.969

— 61.665

— 54.798

— 50.605

~ 43.629

~ 43.520

— 13.654

240 230 220 210 200 190 180 170 160 150 140 130 120 110 100 90 80 70 60 50 40 30 20 10 0 -10

S221

9.508

7.477  
7.468  
7.221  
7.218  
7.200  
7.147  
7.129  
7.109  
7.096  
7.074  
7.056  
7.038  
7.020  
6.733  
6.724  
6.663  
6.641

4.615  
4.587  
4.133  
4.116  
4.098  
4.080  
3.610  
3.351  
3.308  
3.283  
3.034  
3.023  
2.991  
2.980

1.199  
1.181  
1.163

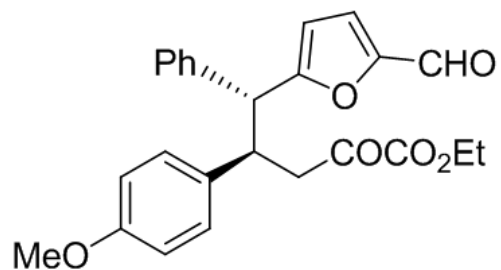

4j'

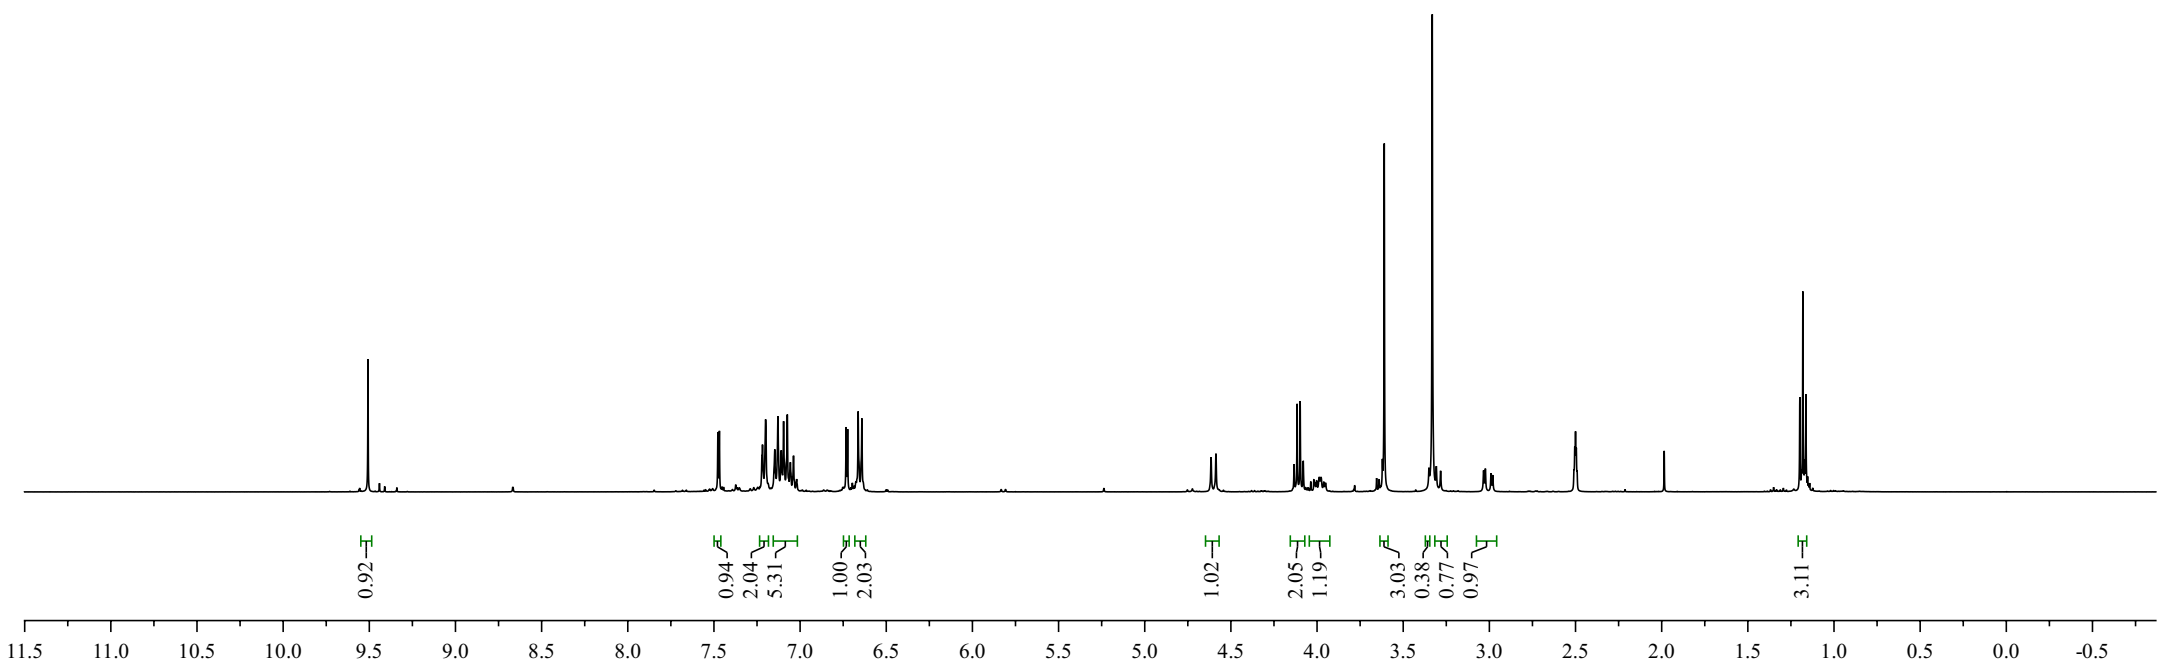



4j'

- 192.024
- 177.617
- 162.773
- 160.021
- 157.484
- 151.758
- 139.272
- 132.819
- 129.267
- 128.430
- 128.149
- 126.559
- 113.248
- 110.338
- 61.702
- 54.722
- 50.126
- 44.144
- 43.496
- 13.664

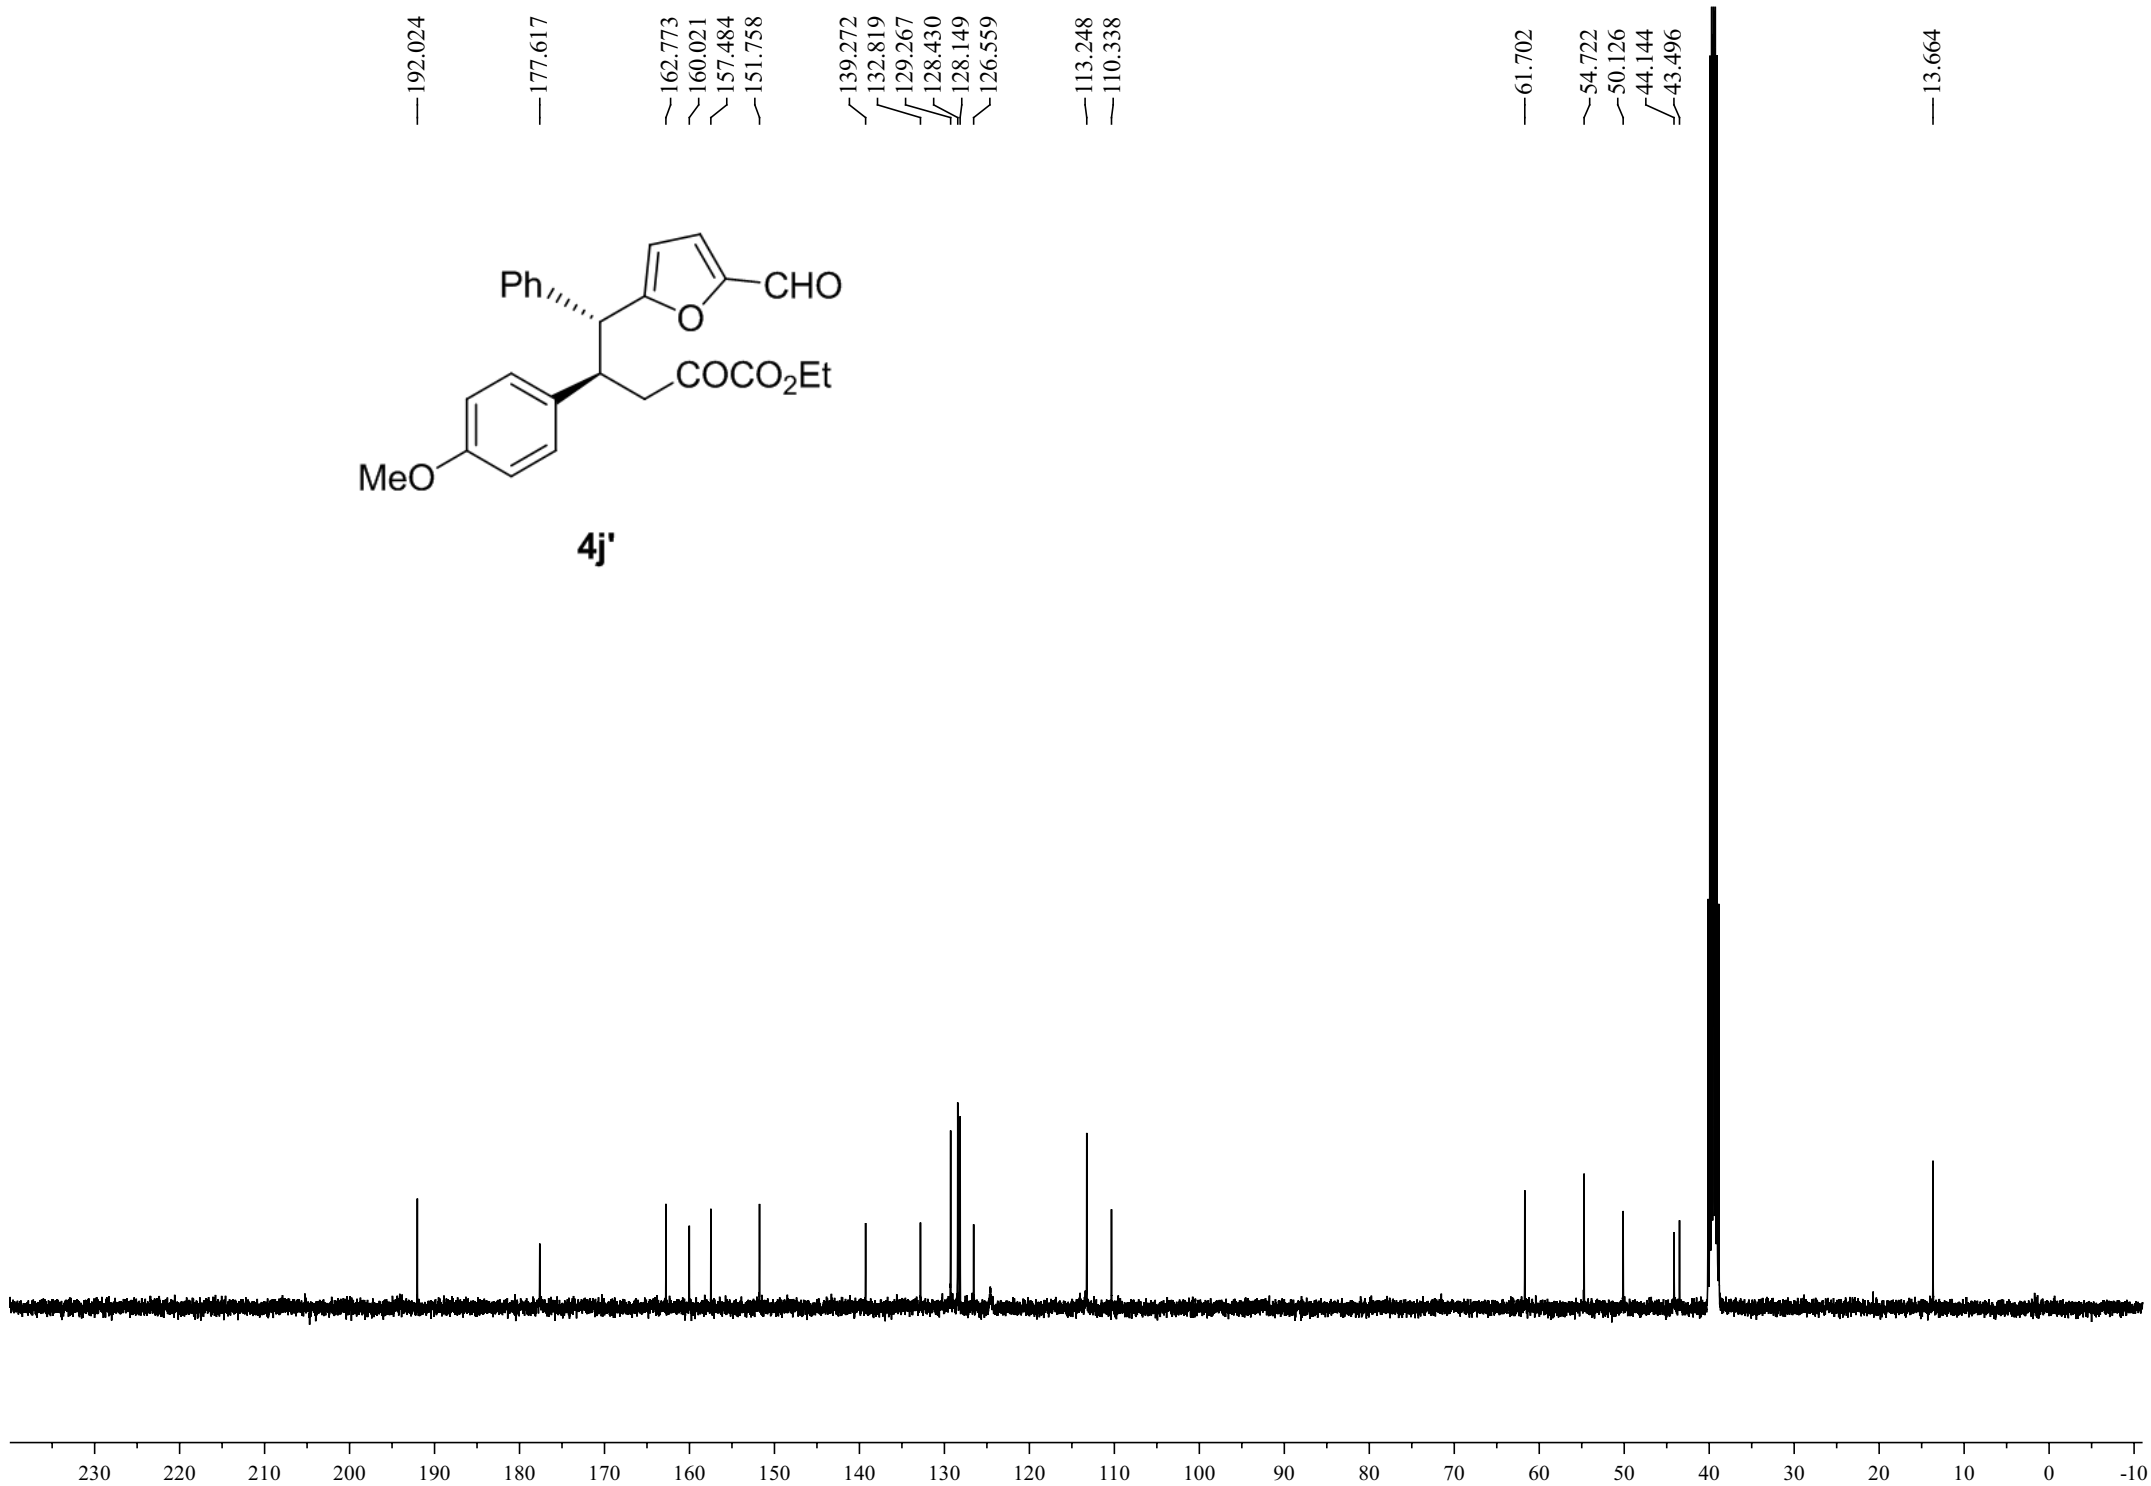

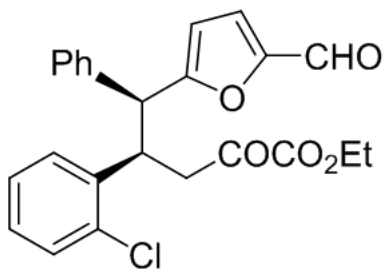

4k

9.348  
7.537  
7.525  
7.411  
7.399  
7.386  
7.313  
7.301  
7.279  
7.266  
7.260  
7.225  
7.219  
7.143  
7.141  
7.130  
7.128  
6.354  
6.350

4.706  
4.688  
4.521  
4.090  
4.078  
4.066  
4.055  
3.144  
3.038  
3.031  
3.010  
3.003

1.172  
1.160  
1.149

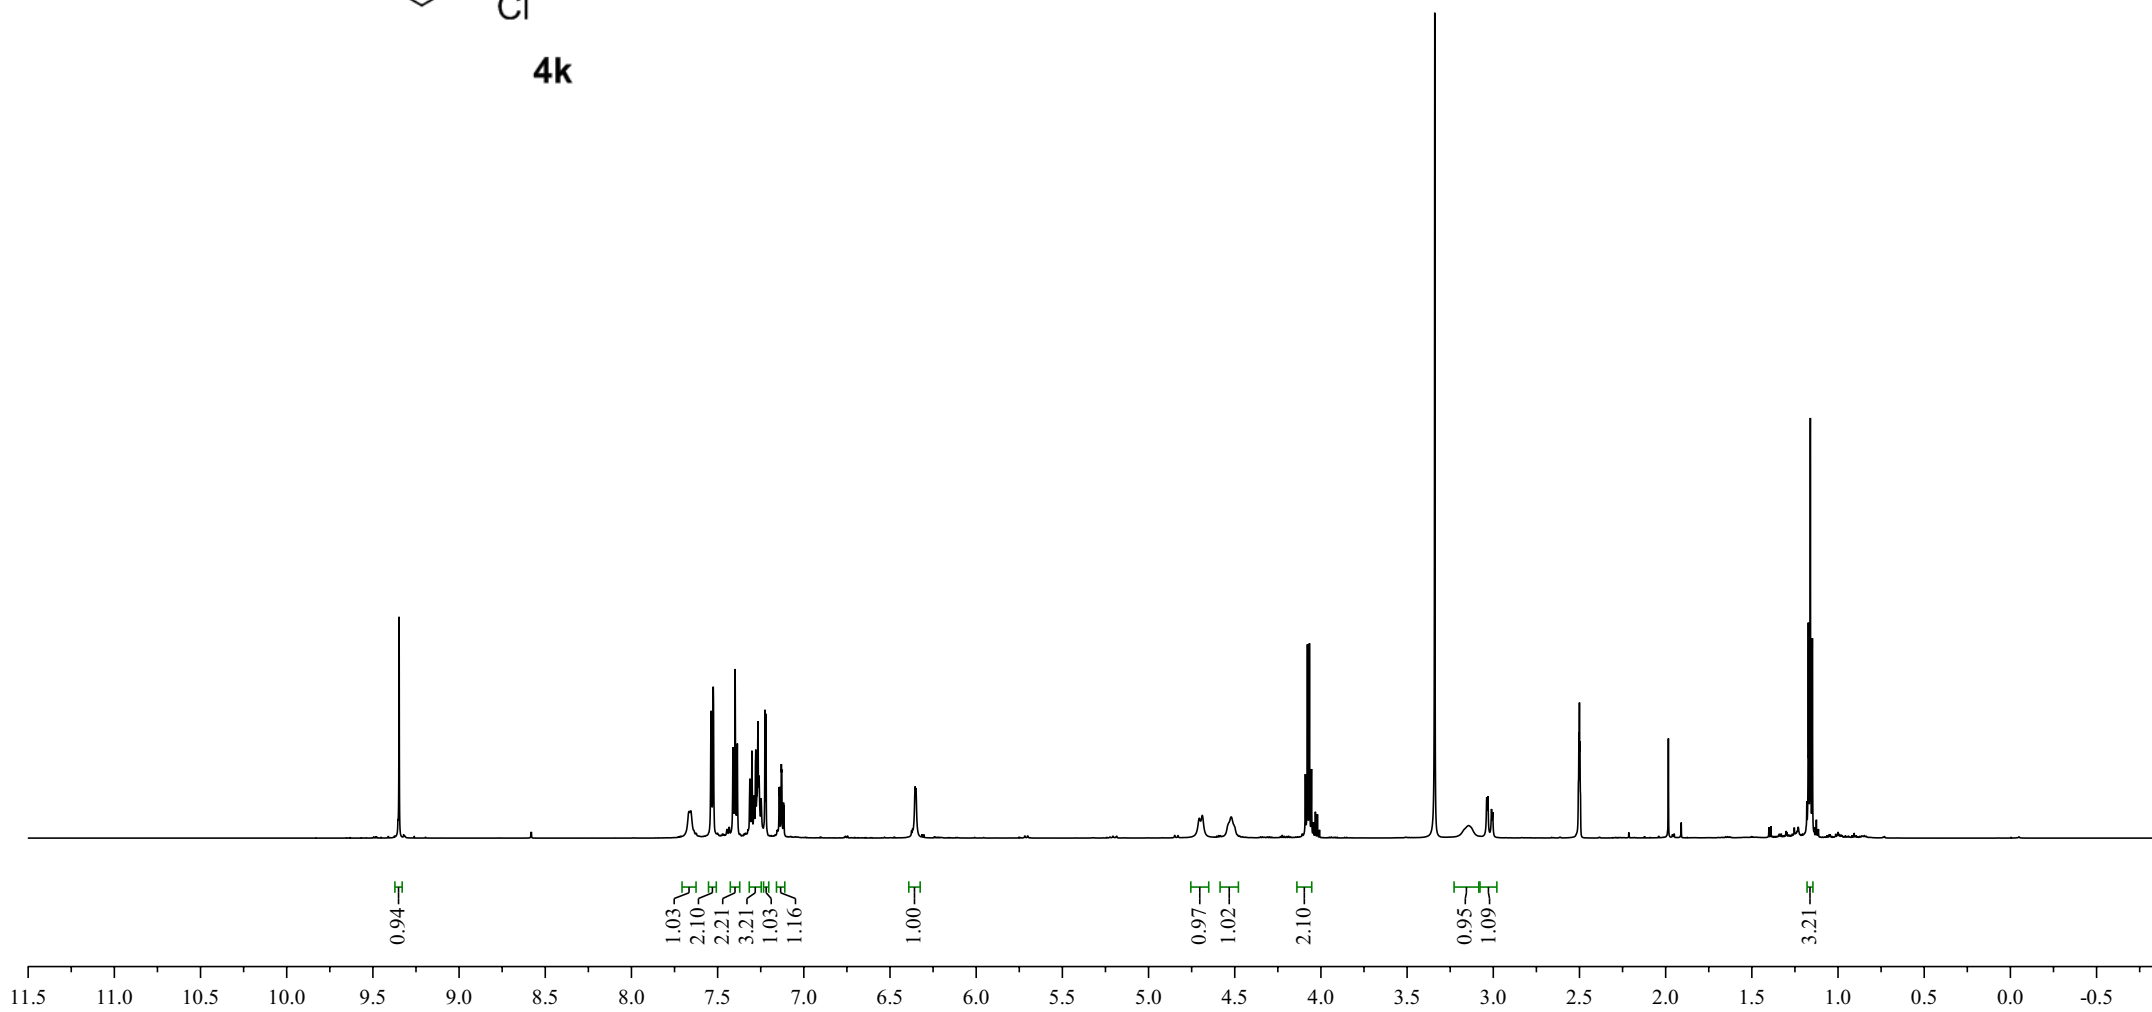



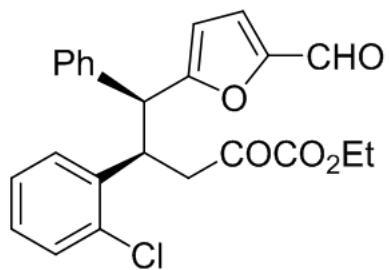

4k

—191.300  
—177.385  
—161.998  
—159.565  
—151.319  
138.789  
133.329  
129.135  
128.892  
128.712  
128.635  
128.258  
127.574  
127.306

—109.473

—61.668  
—59.729

—49.862

—43.301

—20.729

—13.678

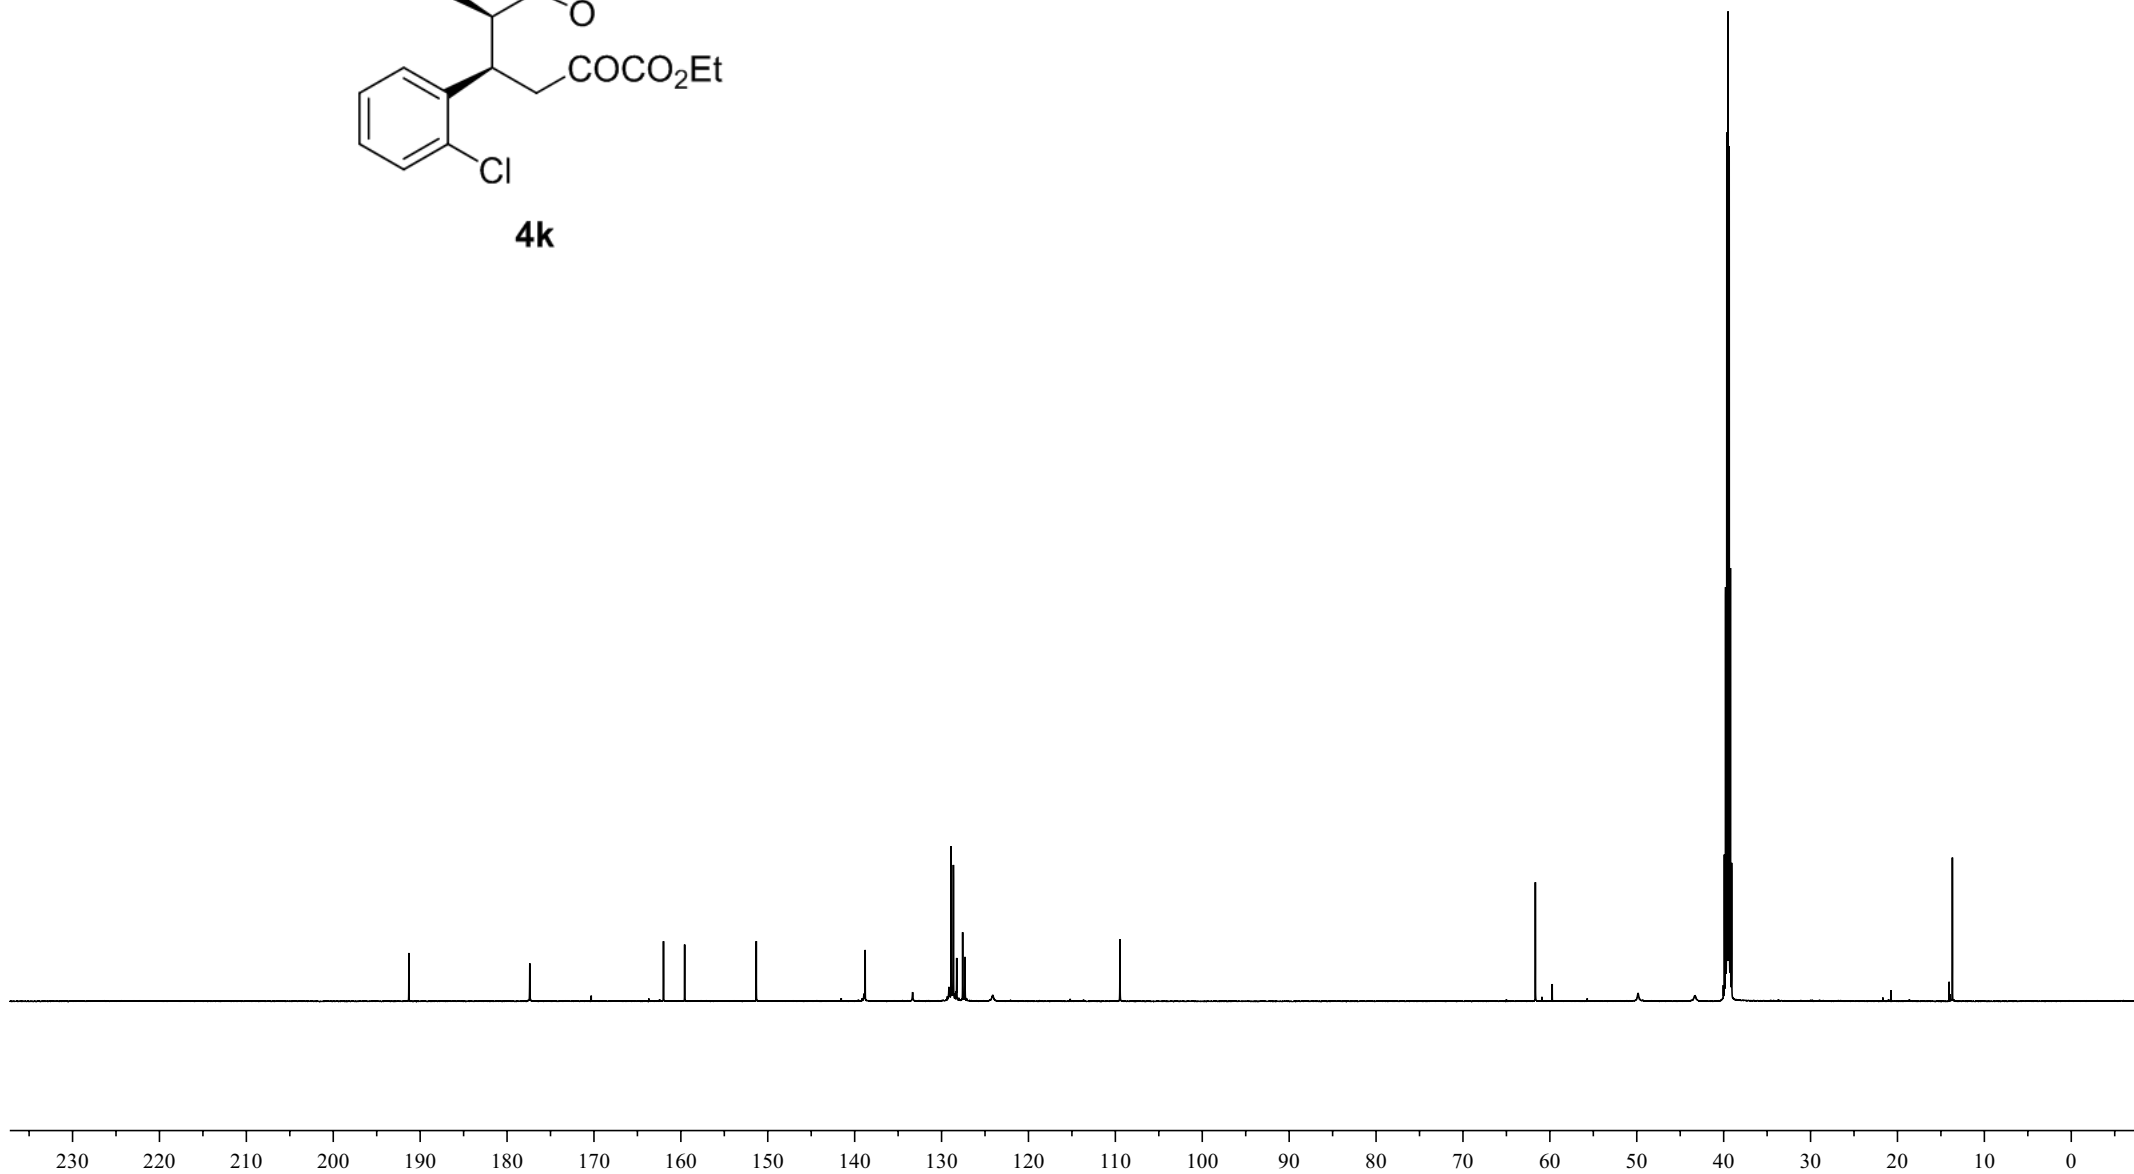

9.531  
 7.579  
 7.567  
 7.492  
 7.486  
 7.217  
 7.204  
 7.192  
 7.179  
 7.165  
 7.163  
 7.151  
 7.150  
 7.134  
 7.121  
 7.108  
 7.059  
 7.056  
 7.053  
 7.047  
 7.043  
 7.030  
 6.764  
 6.758  
 4.738  
 4.580  
 4.572  
 4.561  
 4.557  
 4.546  
 4.143  
 4.131  
 4.119  
 3.285  
 3.270  
 3.243  
 3.235  
 3.215  
 3.207  
 1.212  
 1.200  
 1.188

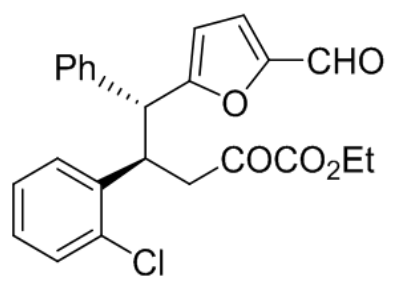

4k'

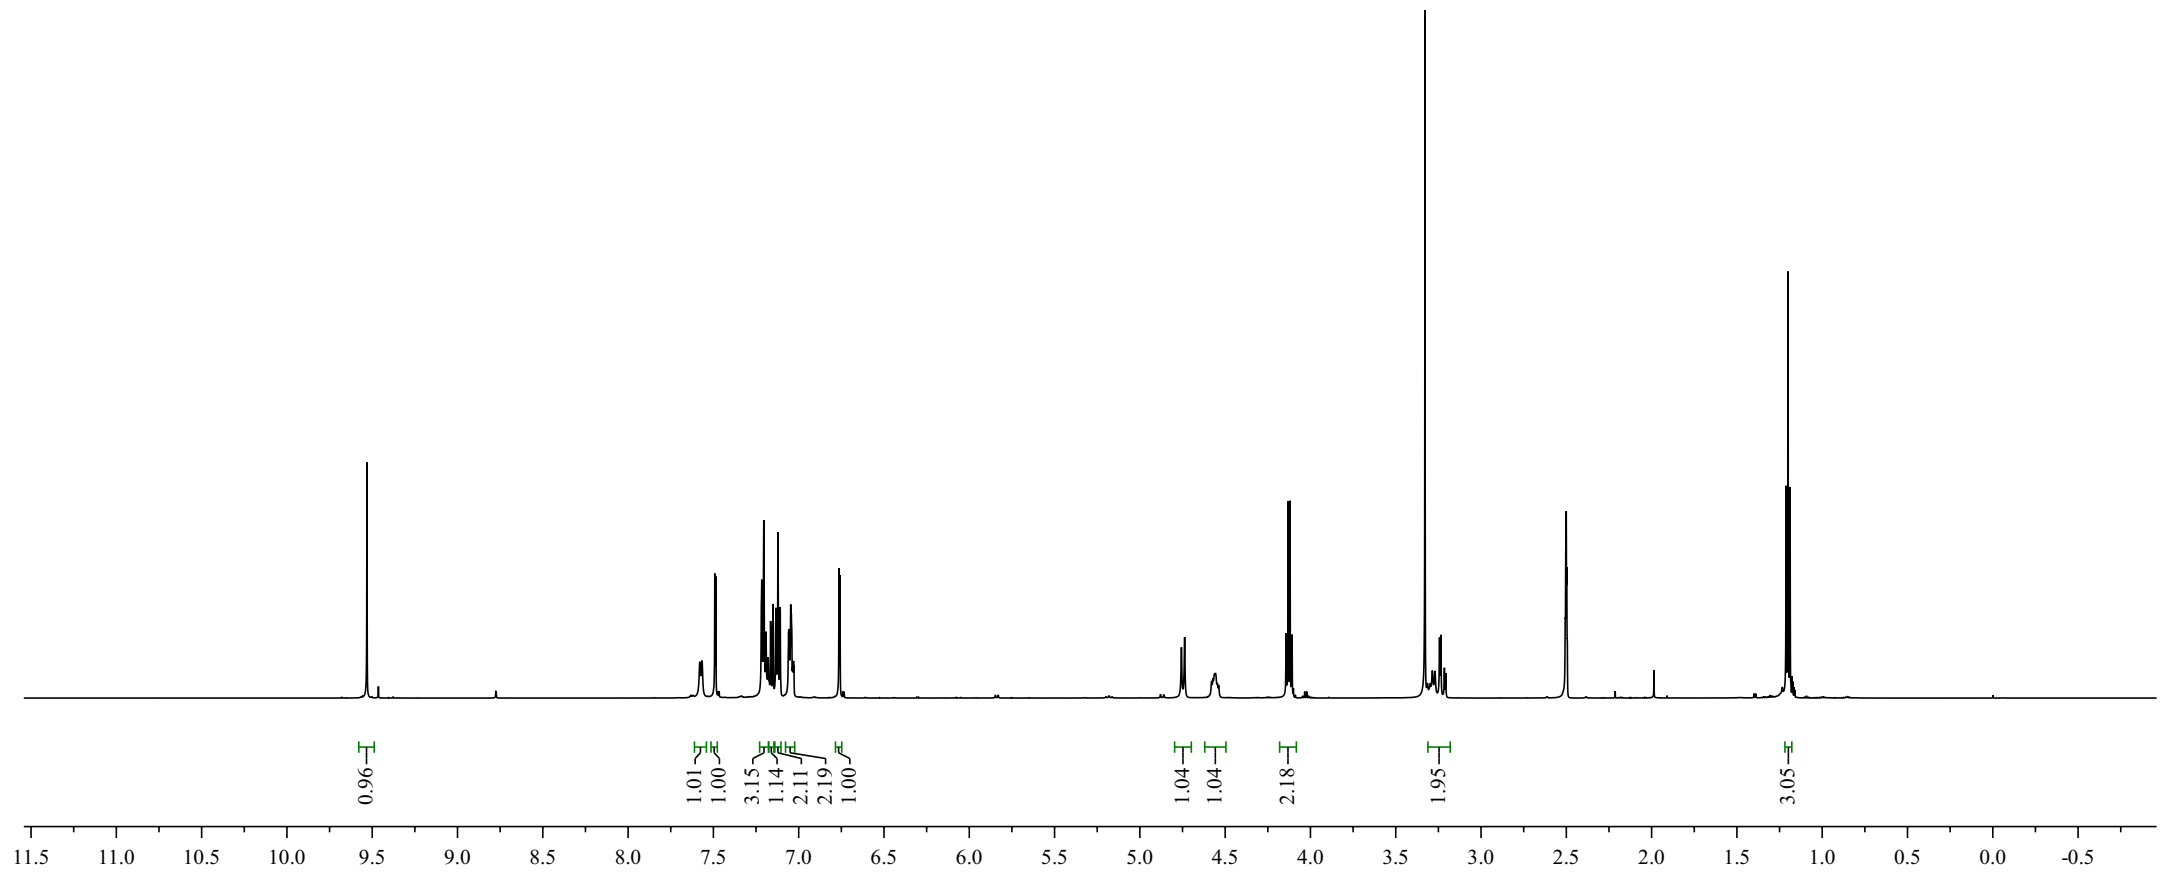

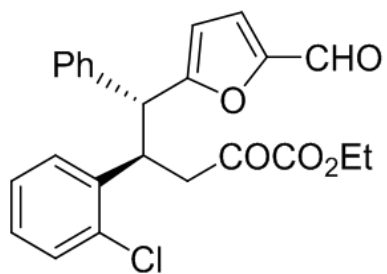

4k'

—191.059  
—177.746  
—161.874  
—159.649  
—151.970  
—138.575  
—138.542  
—133.347  
—129.004  
—128.181  
—128.145  
—128.077  
—128.024  
—127.094  
—126.839  
—110.729

—61.727

—49.381

—43.727

—13.702

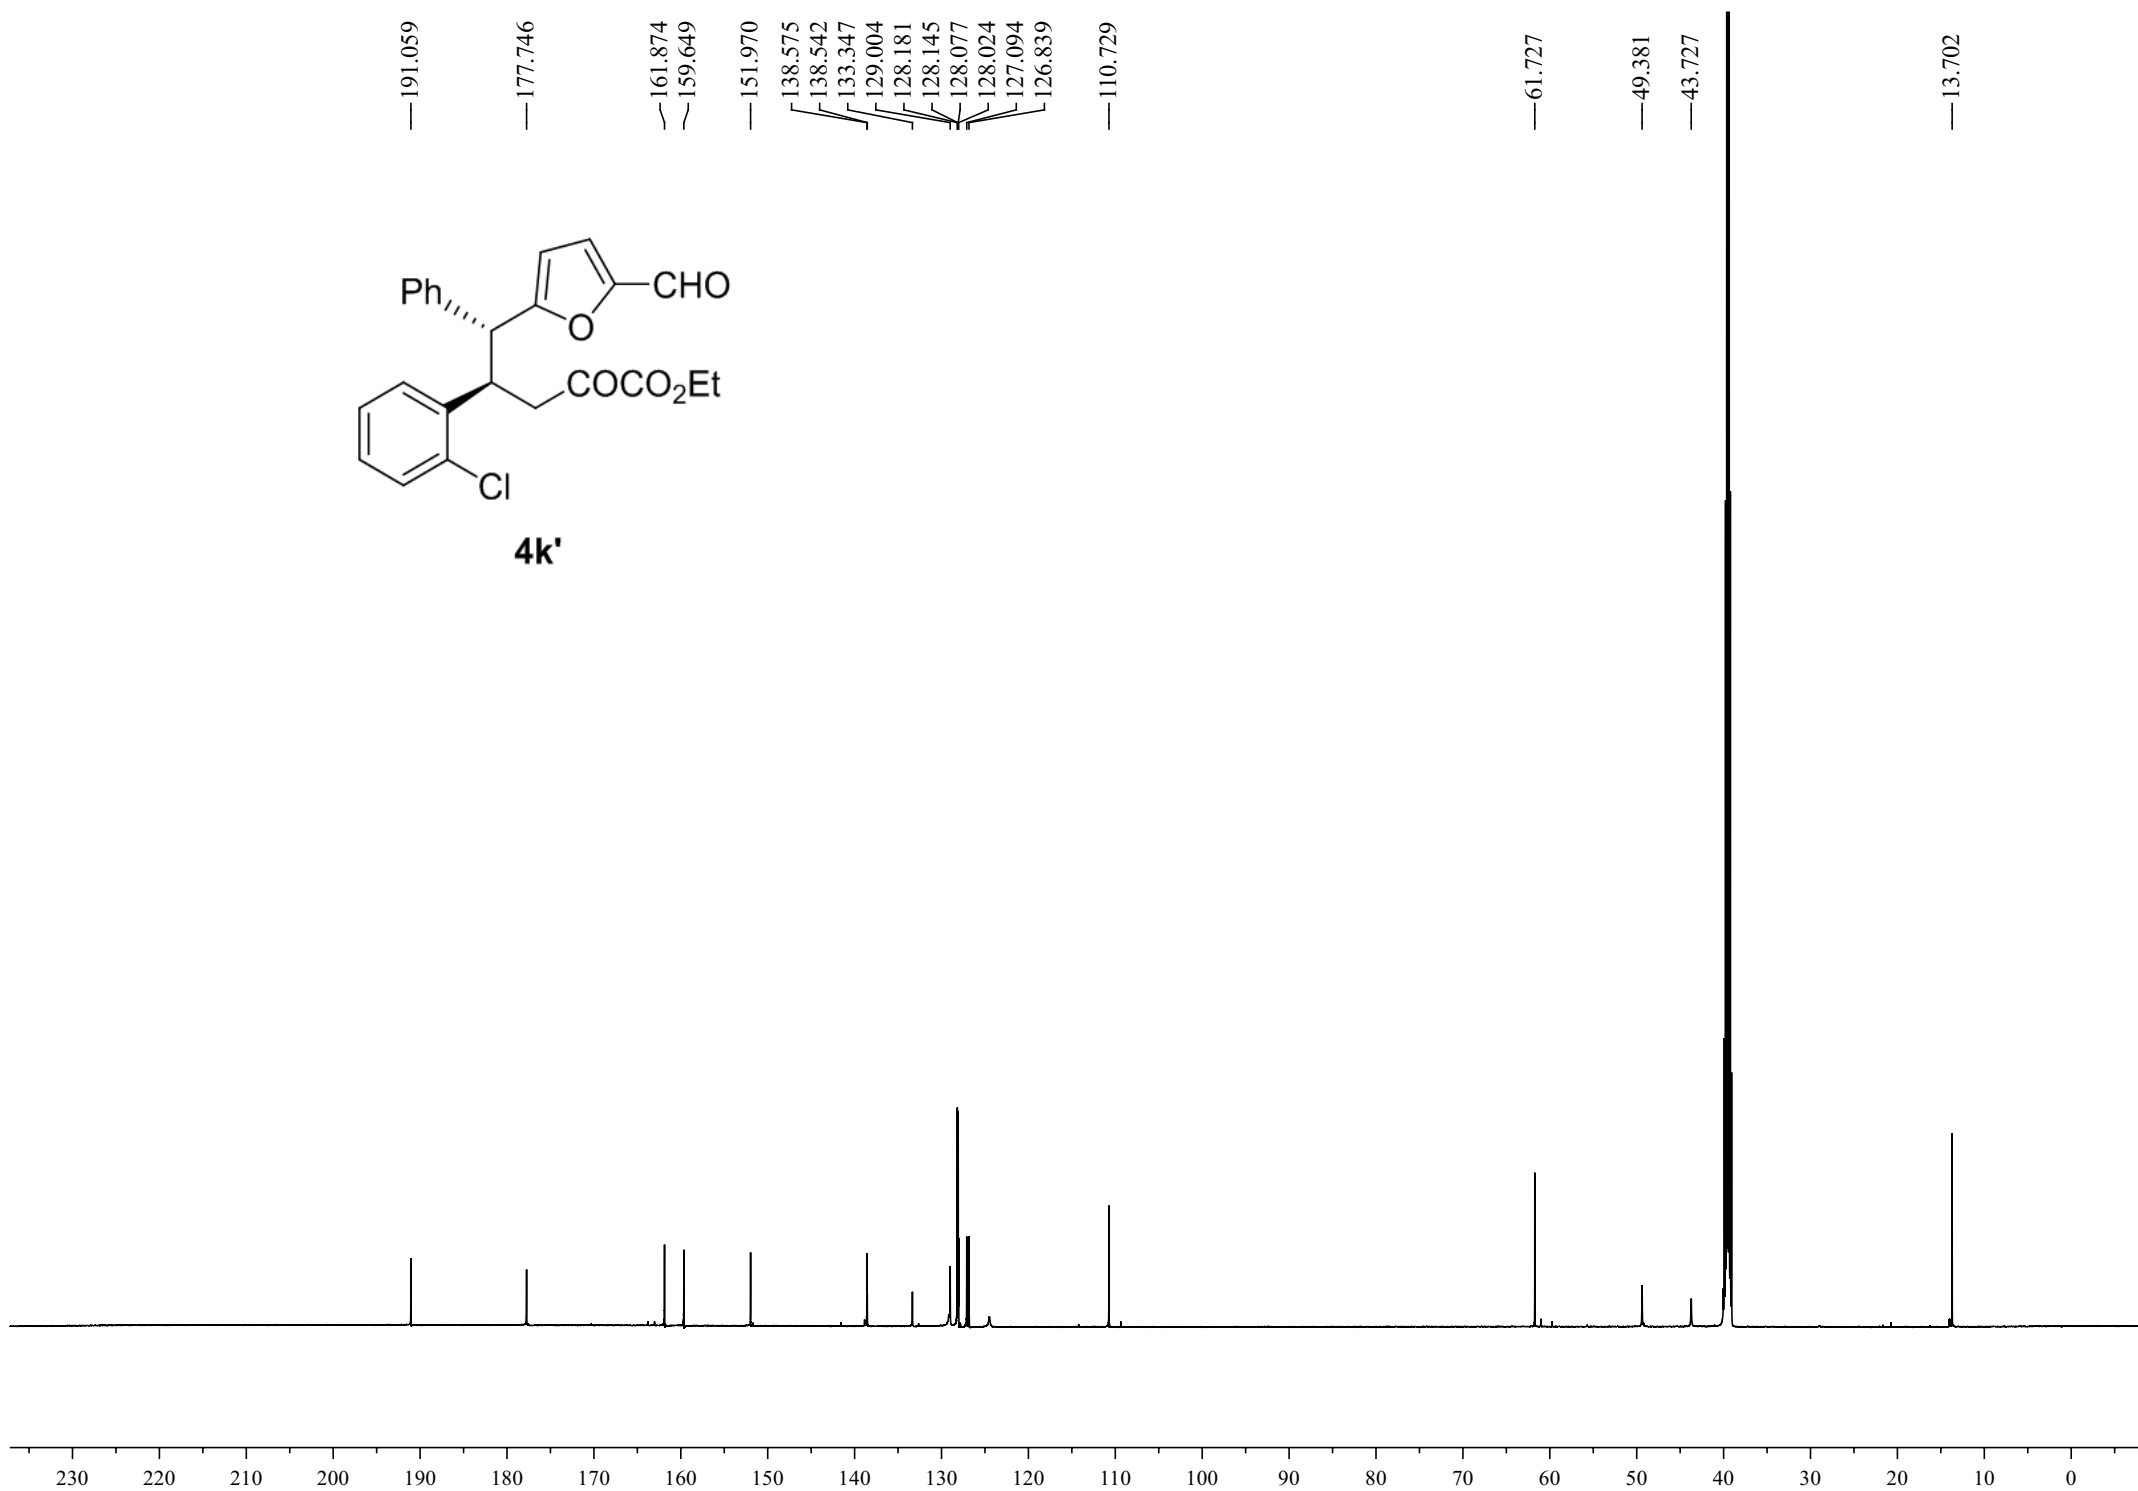

9.344  
7.535  
7.521  
7.517  
7.514  
7.392  
7.379  
7.366  
7.323  
7.277  
7.254  
7.248  
7.208  
7.153  
7.152  
6.578  
6.564

4.659  
4.639  
4.078  
4.066  
4.054  
4.042  
4.018  
3.323  
3.311  
3.294  
2.836  
2.830  
2.806  
2.800

1.156  
1.144  
1.132

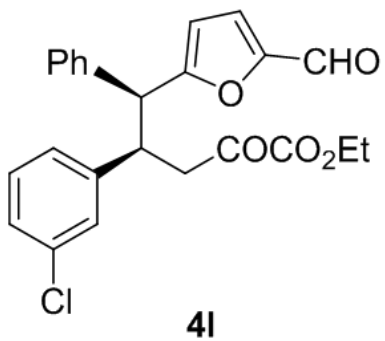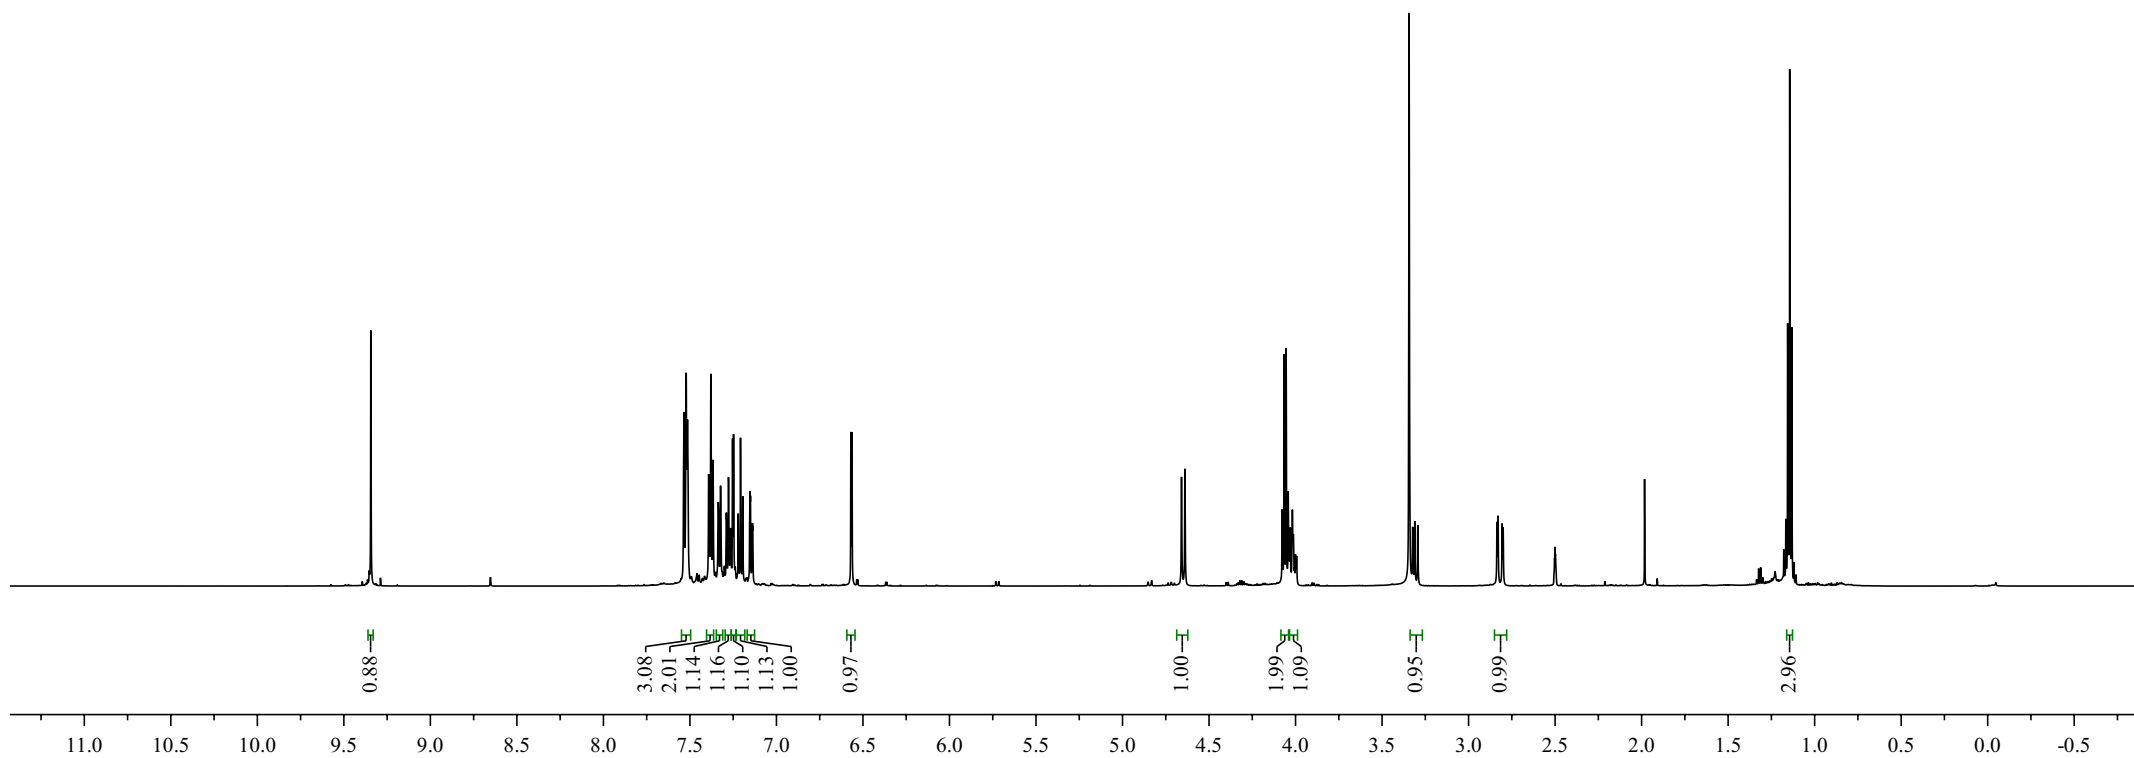

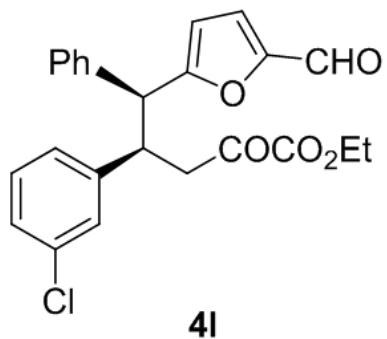

—192.461  
—177.887  
—162.953  
—160.341  
—151.551  
—144.961  
—139.822  
—133.201  
—130.281  
—129.396  
—128.943  
—128.476  
—127.957  
—127.569  
—127.103  
—110.565

—62.179  
—50.474  
—44.364  
—43.581

—14.140

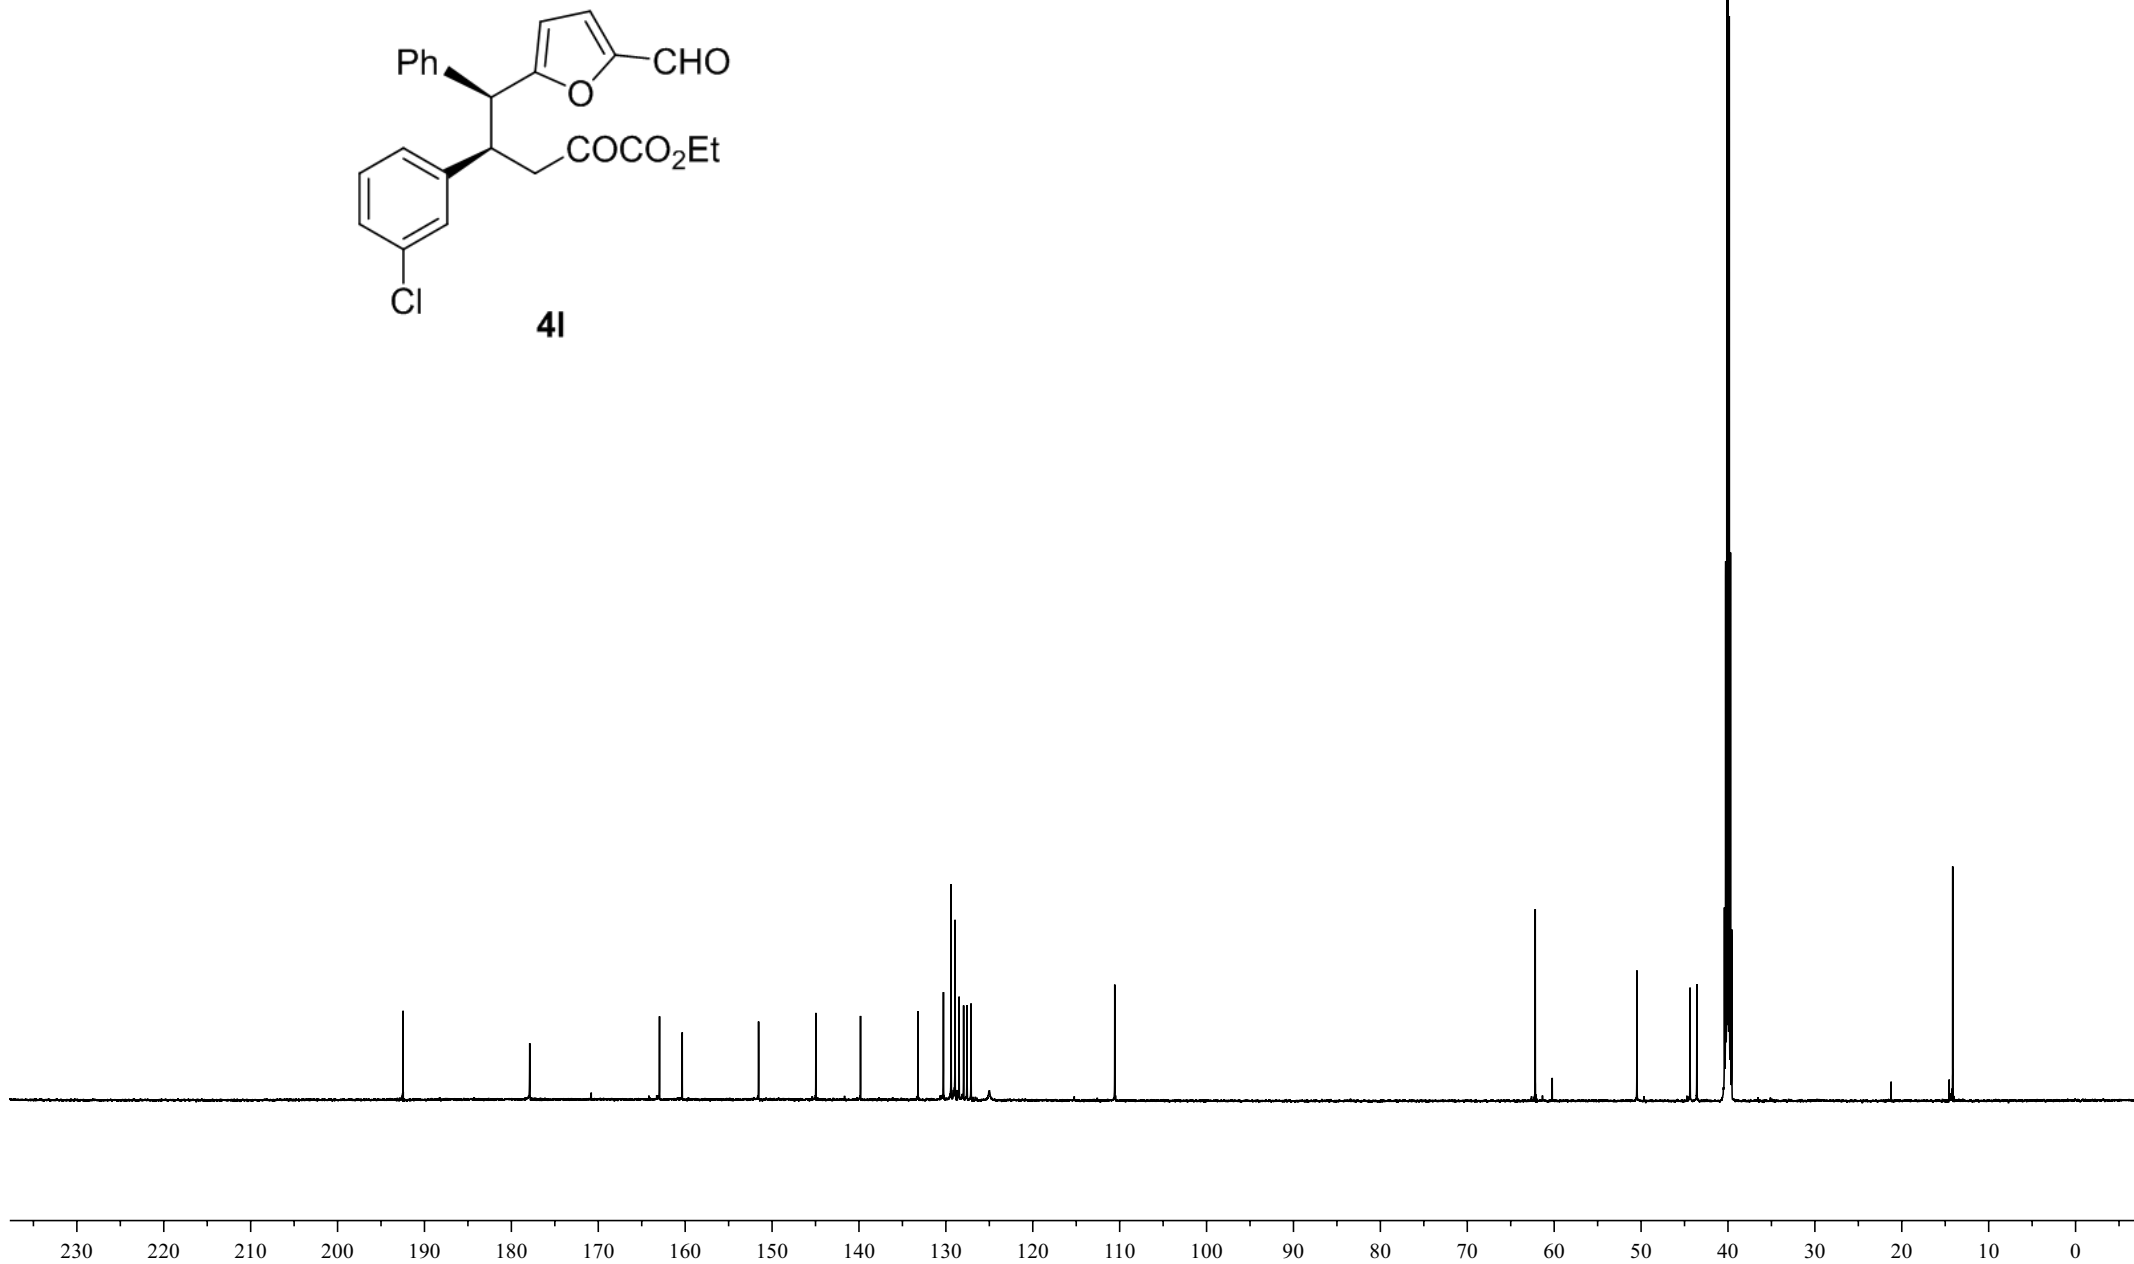

—9.509

7.504  
7.495  
7.328  
7.235  
7.217  
7.173  
7.158  
7.154  
7.140  
7.131  
7.121  
7.111  
7.093  
7.068  
7.048  
7.029  
6.769  
6.760  
4.704  
4.676  
4.141  
4.123  
4.105  
4.088  
4.062  
4.052  
4.037  
4.026  
4.008  
3.998  
3.448  
3.423  
3.404  
3.379  
3.362  
3.113  
3.103  
3.069  
3.059  
2.510  
2.505  
2.501

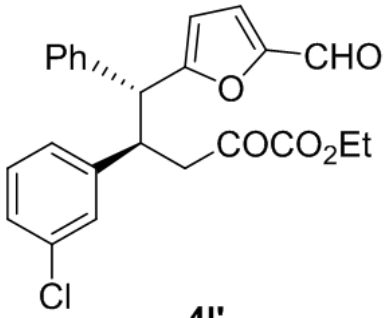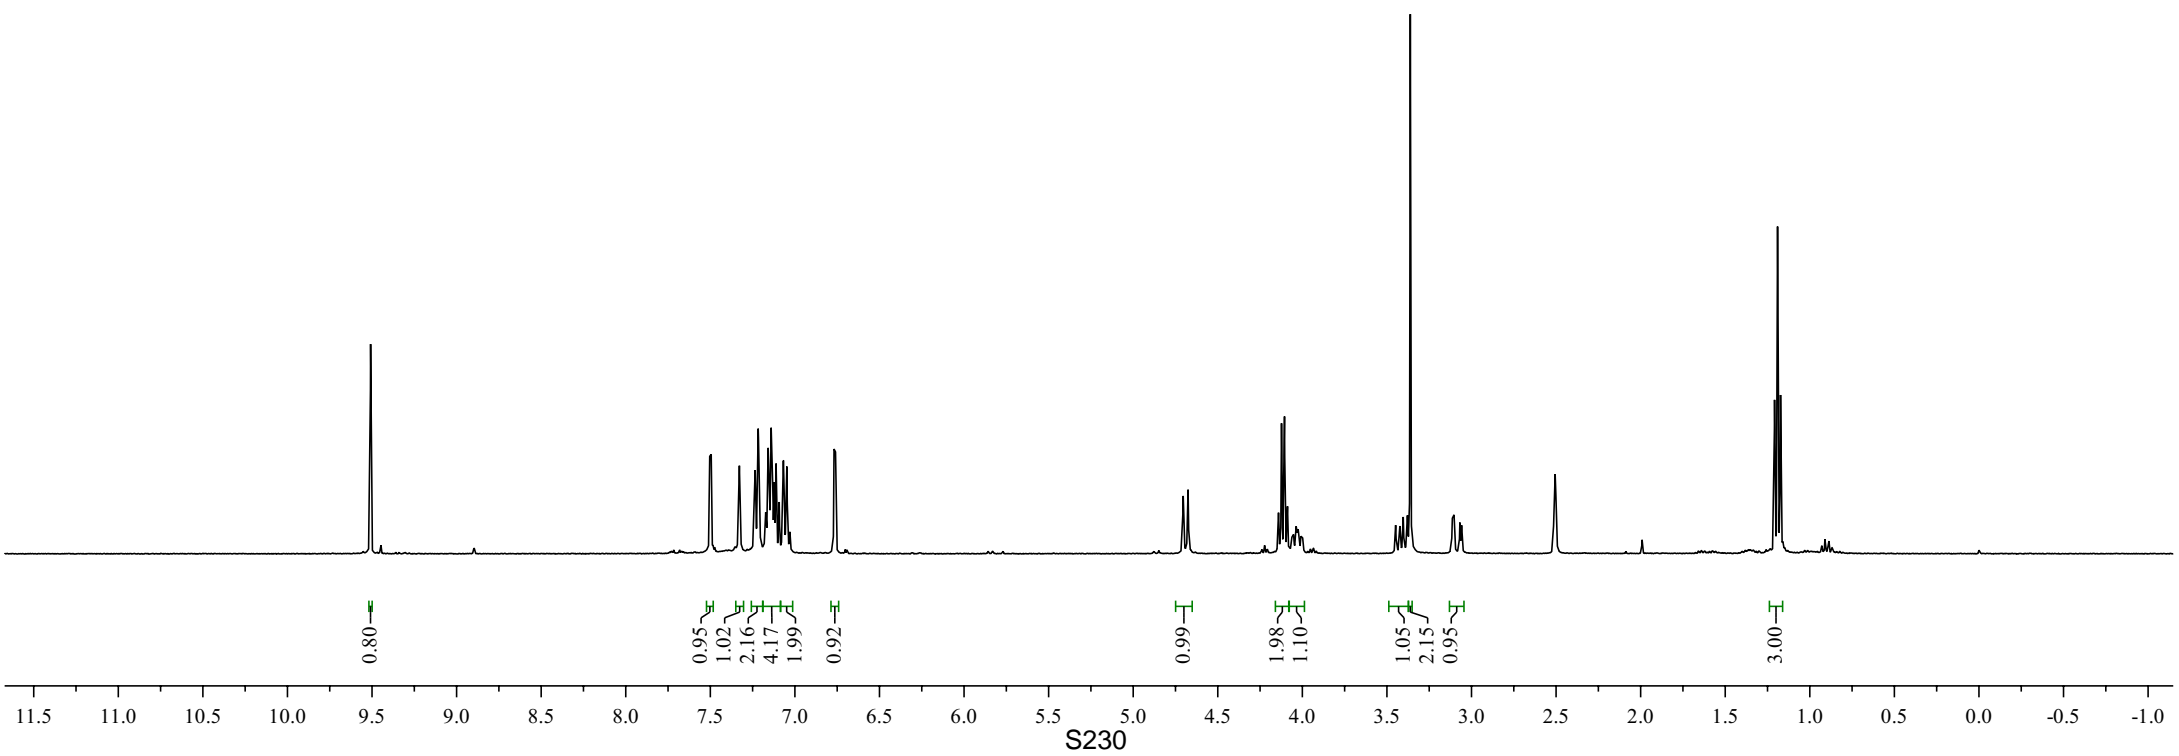

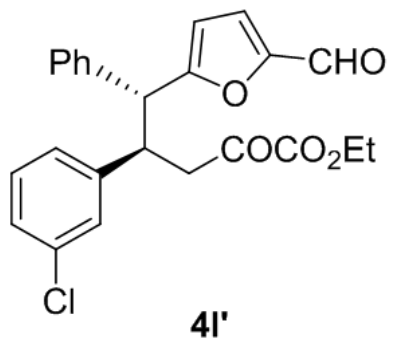

—191.652  
—177.680  
—162.361  
—159.897  
—151.840  
143.828  
138.941  
132.499  
129.594  
128.423  
128.245  
127.268  
126.732  
126.344  
—110.442

—61.746  
—49.589  
43.823  
43.653

—13.689

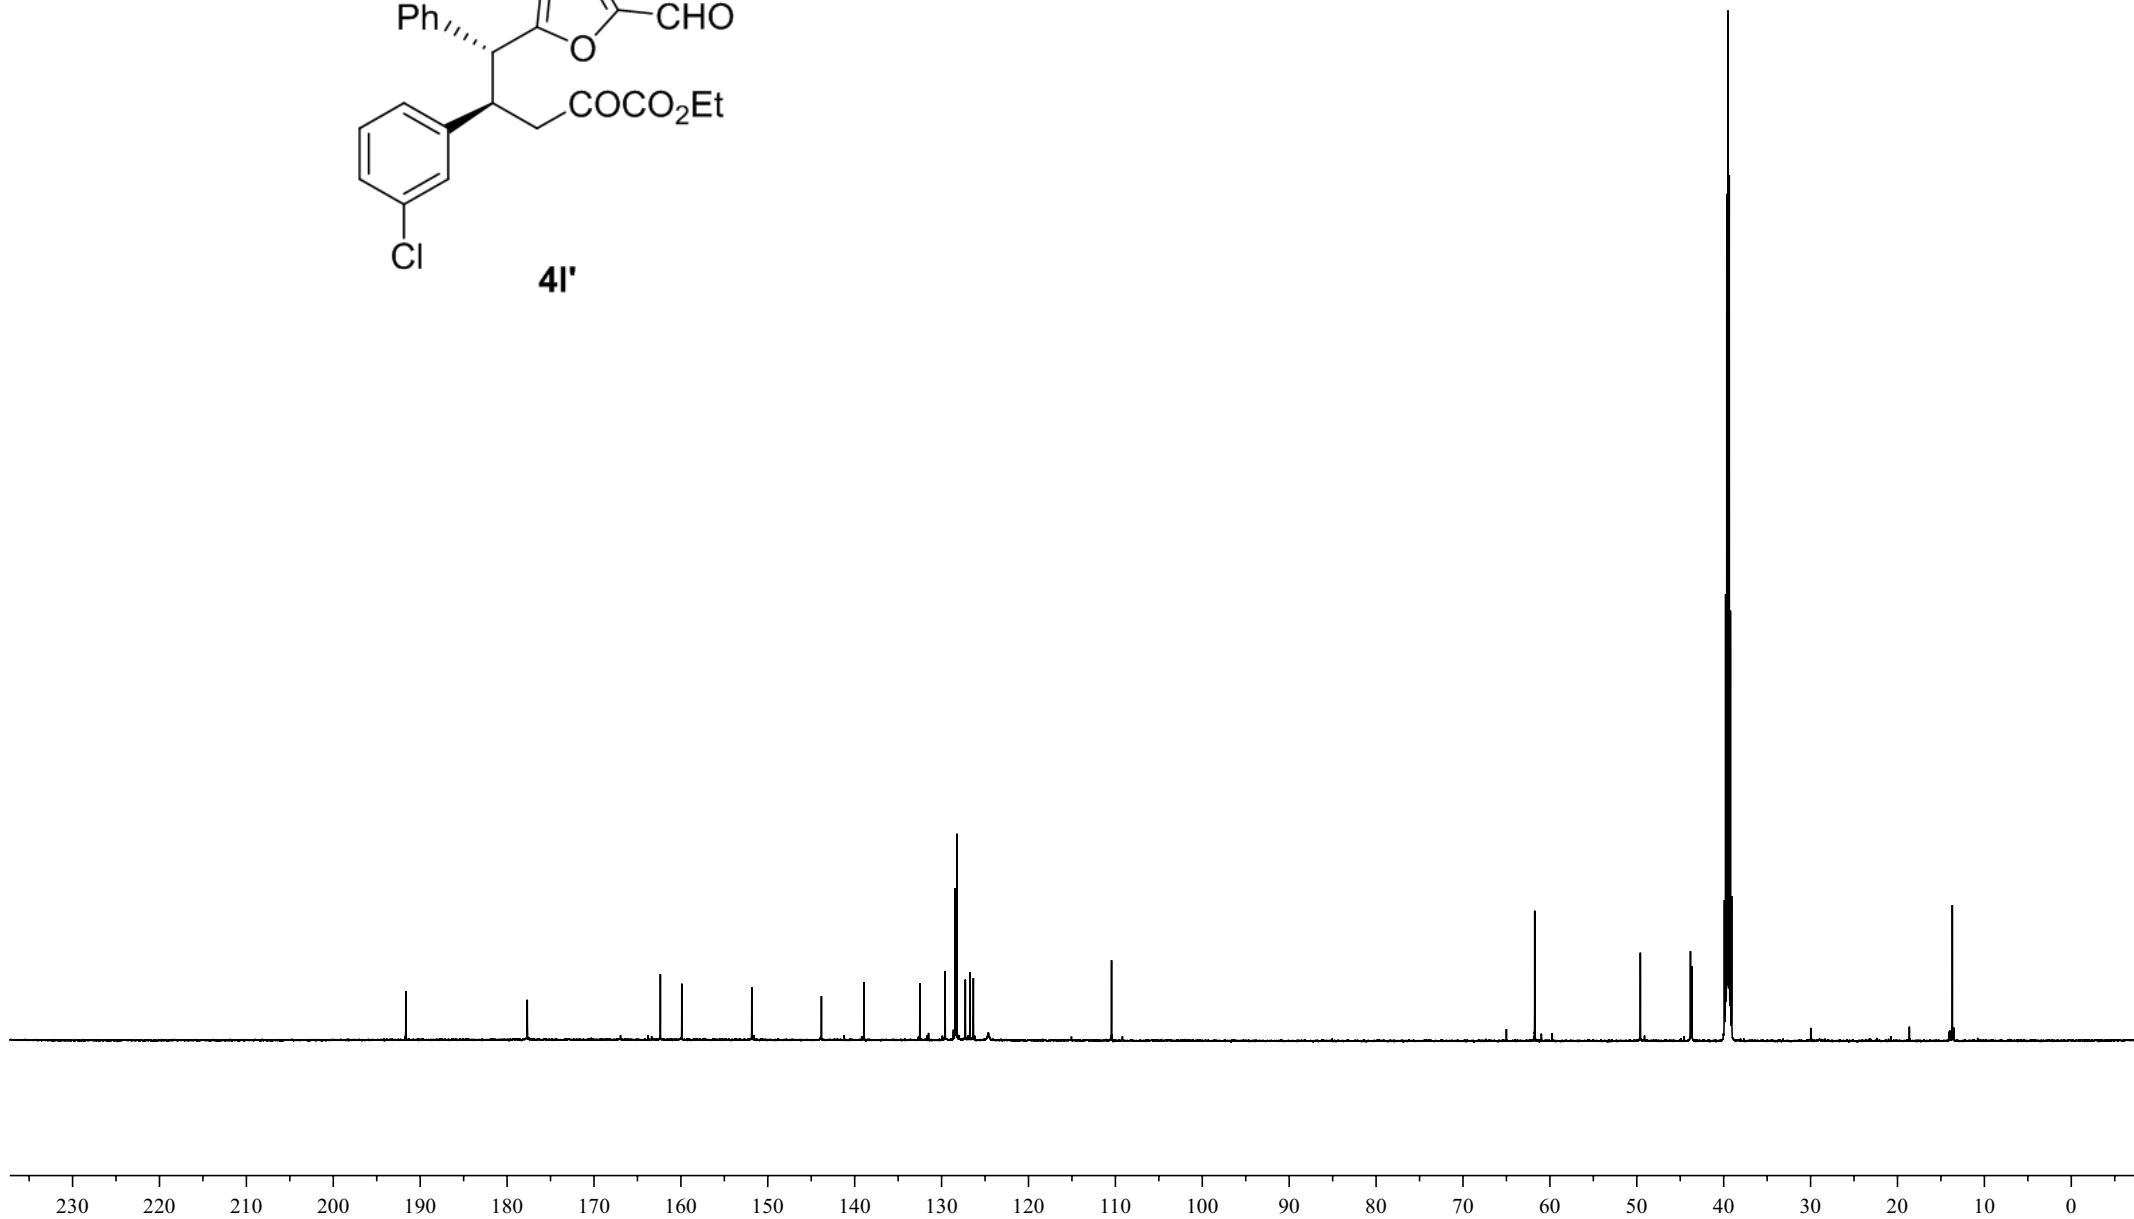

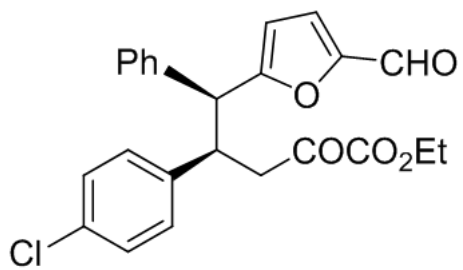

4m

9.344  
7.537  
7.519  
7.414  
7.398  
7.393  
7.379  
7.360  
7.294  
7.276  
7.271  
7.261  
7.245  
7.240  
7.237  
6.534  
6.525

4.627  
4.598  
4.085  
4.067  
4.049  
4.031  
3.326  
3.282  
3.255  
3.238  
2.829  
2.794  
2.785

1.157  
1.139  
1.121

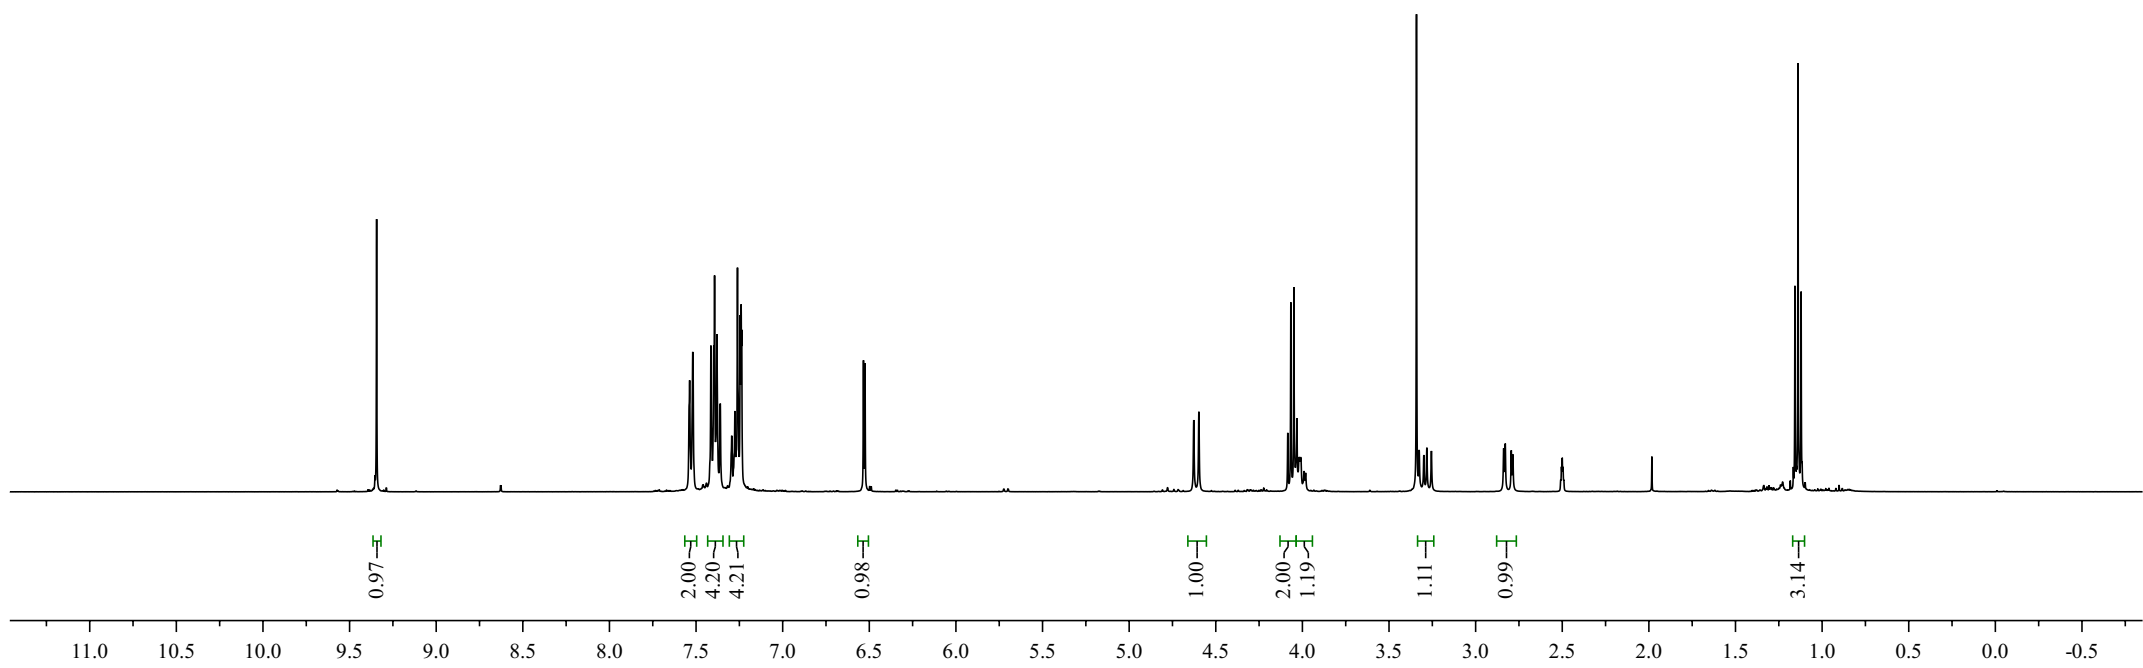



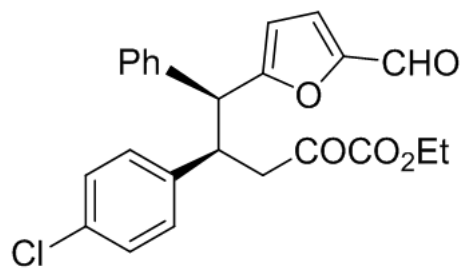

4m

—192.013  
—177.400  
—162.457  
—159.871  
—151.086  
—140.887  
—139.328  
—131.098  
—130.037  
—128.898  
—128.442  
—127.997  
—127.455  
—110.064  
—61.686  
—50.154  
—43.611  
—43.218

240 230 220 210 200 190 180 170 160 150 140 130 120 110 100 90 80 70 60 50 40 30 20 10 0 -10

S233

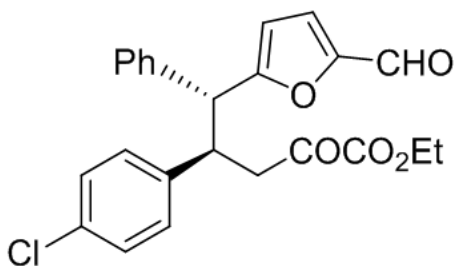

4m'

9.510

7.488  
7.479  
7.238  
7.221  
7.217  
7.203  
7.189  
7.159  
7.153  
7.149  
7.137  
7.131  
7.111  
7.060  
7.047  
7.042  
7.024  
6.762  
6.753

4.659  
4.631

4.137  
4.119  
4.102  
4.084  
3.981  
3.396  
3.377  
3.108  
3.098  
3.063  
3.053

1.199  
1.181  
1.163

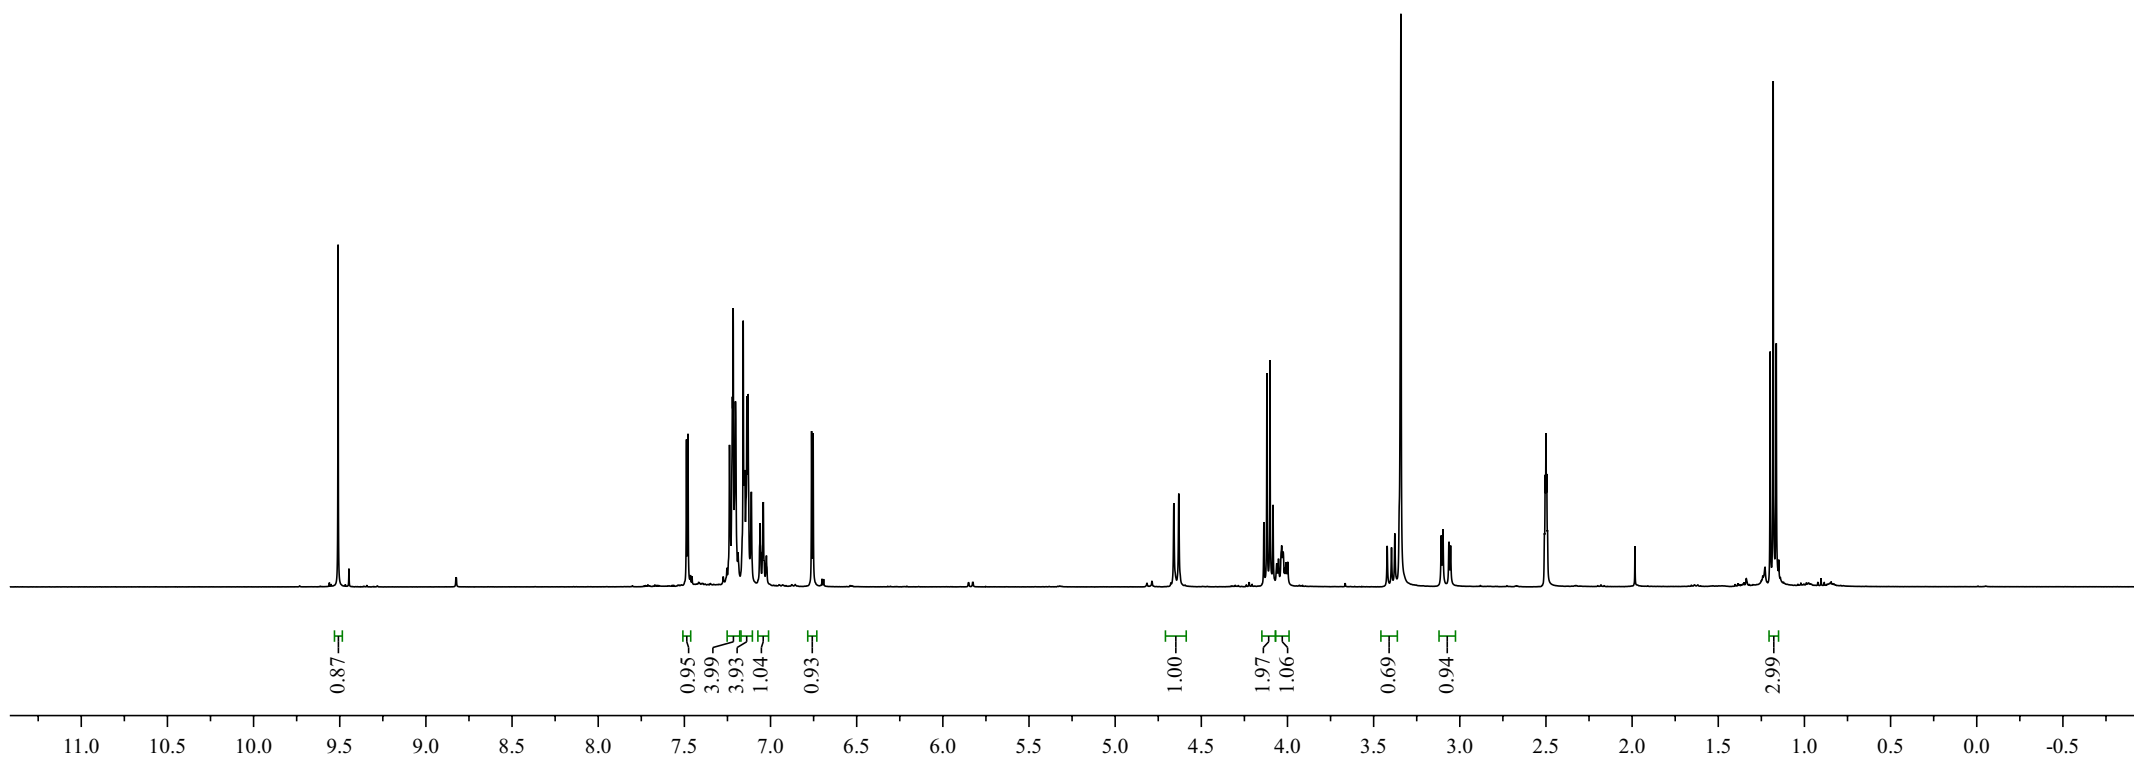

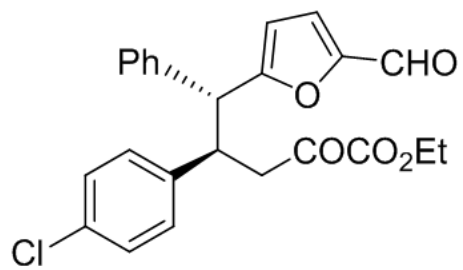

4m'

—191.706  
—177.681  
—162.406  
—159.918  
—151.833  
—140.286  
—139.018  
—130.820  
—130.275  
—128.427  
—128.258  
—127.807  
—126.723  
—110.420

—61.752  
—49.756  
—43.785  
—43.589

—13.686

240 230 220 210 200 190 180 170 160 150 140 130 120 110 100 90 80 70 60 50 40 30 20 10 0 -10

S235

9.443  
7.447  
7.444  
7.426  
7.372  
7.354  
7.335  
7.295  
7.277  
7.265  
6.964  
6.955  
6.715  
6.711  
6.680  
6.660  
6.656  
6.621  
6.604  
6.134  
6.125  
5.872

4.245  
4.216  
4.190  
4.188  
4.172  
4.170  
4.154  
4.152  
4.136  
4.134  
4.075  
4.065  
3.995  
3.197  
3.178  
3.153  
2.893  
2.883  
2.850  
2.840

1.274  
1.256  
1.238

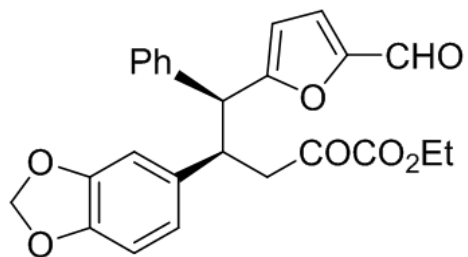

4n

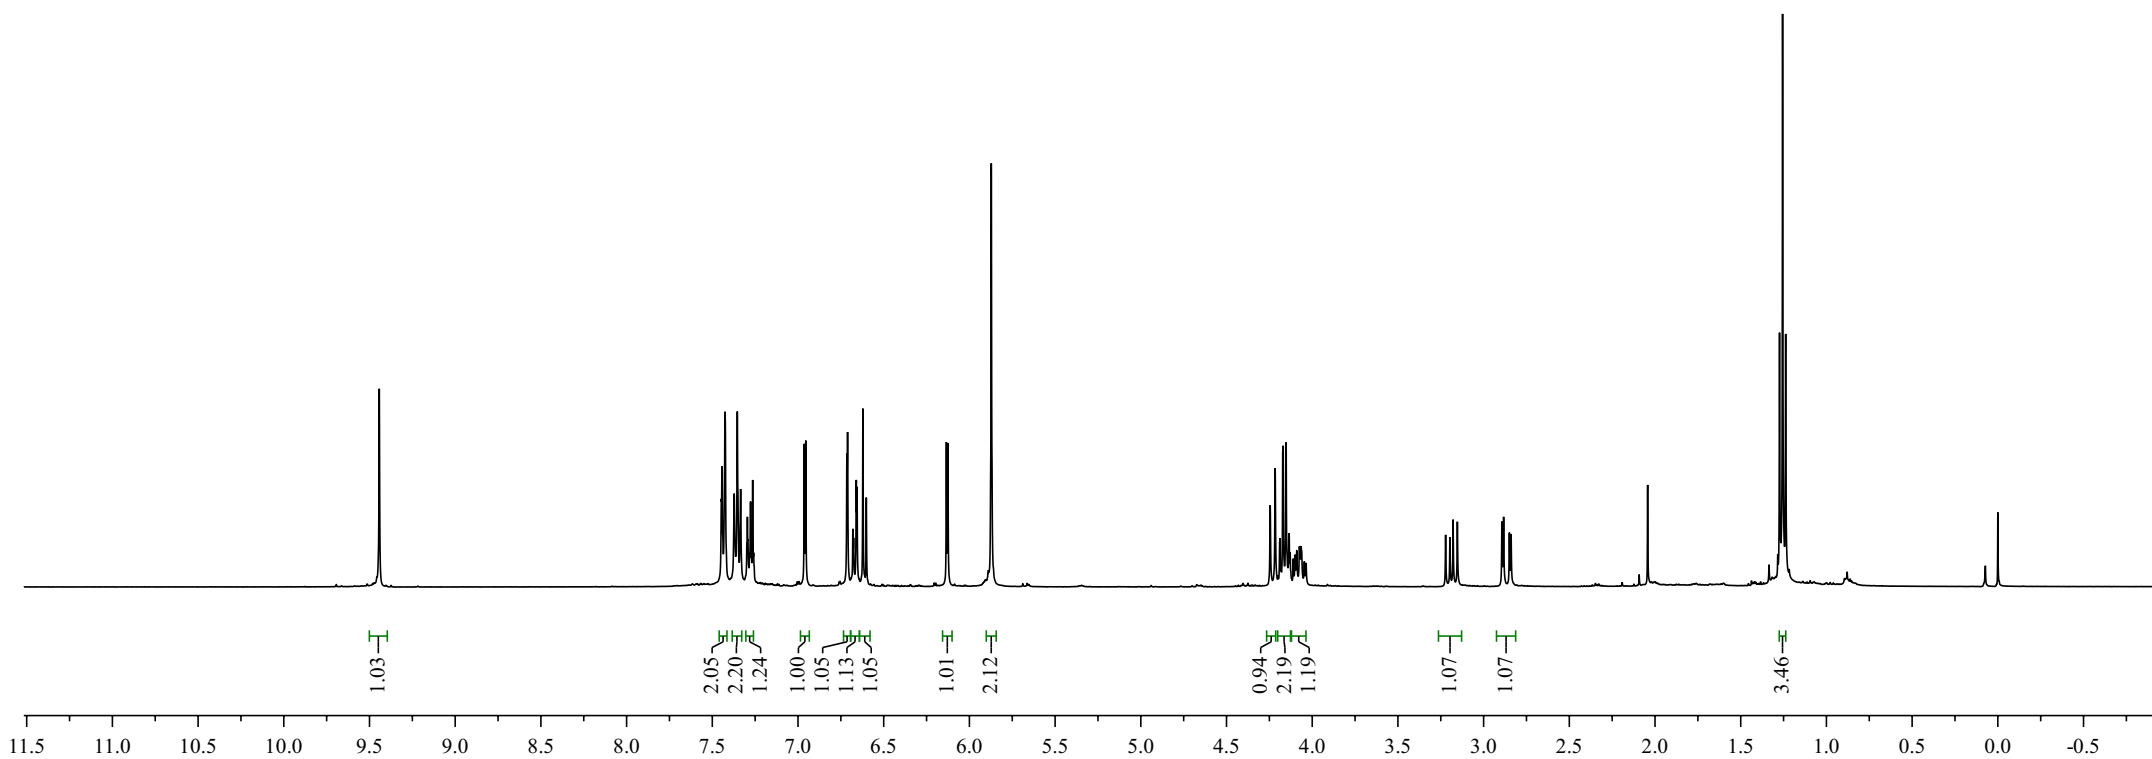

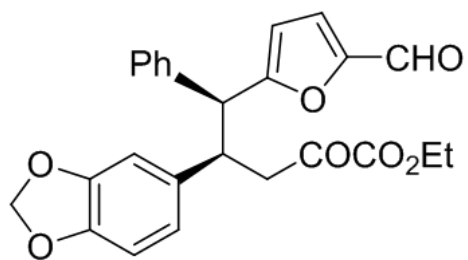

4n

— 192.109  
— 177.043  
— 162.145  
— 160.303  
— 151.844  
— 147.677  
— 146.433  
— 138.485  
— 134.668  
— 129.141  
— 128.459  
— 127.826  
— 121.272  
— 109.947  
— 108.200  
— 107.849  
— 100.937

— 62.420

— 52.246

— 44.614  
— 43.941

— 13.824

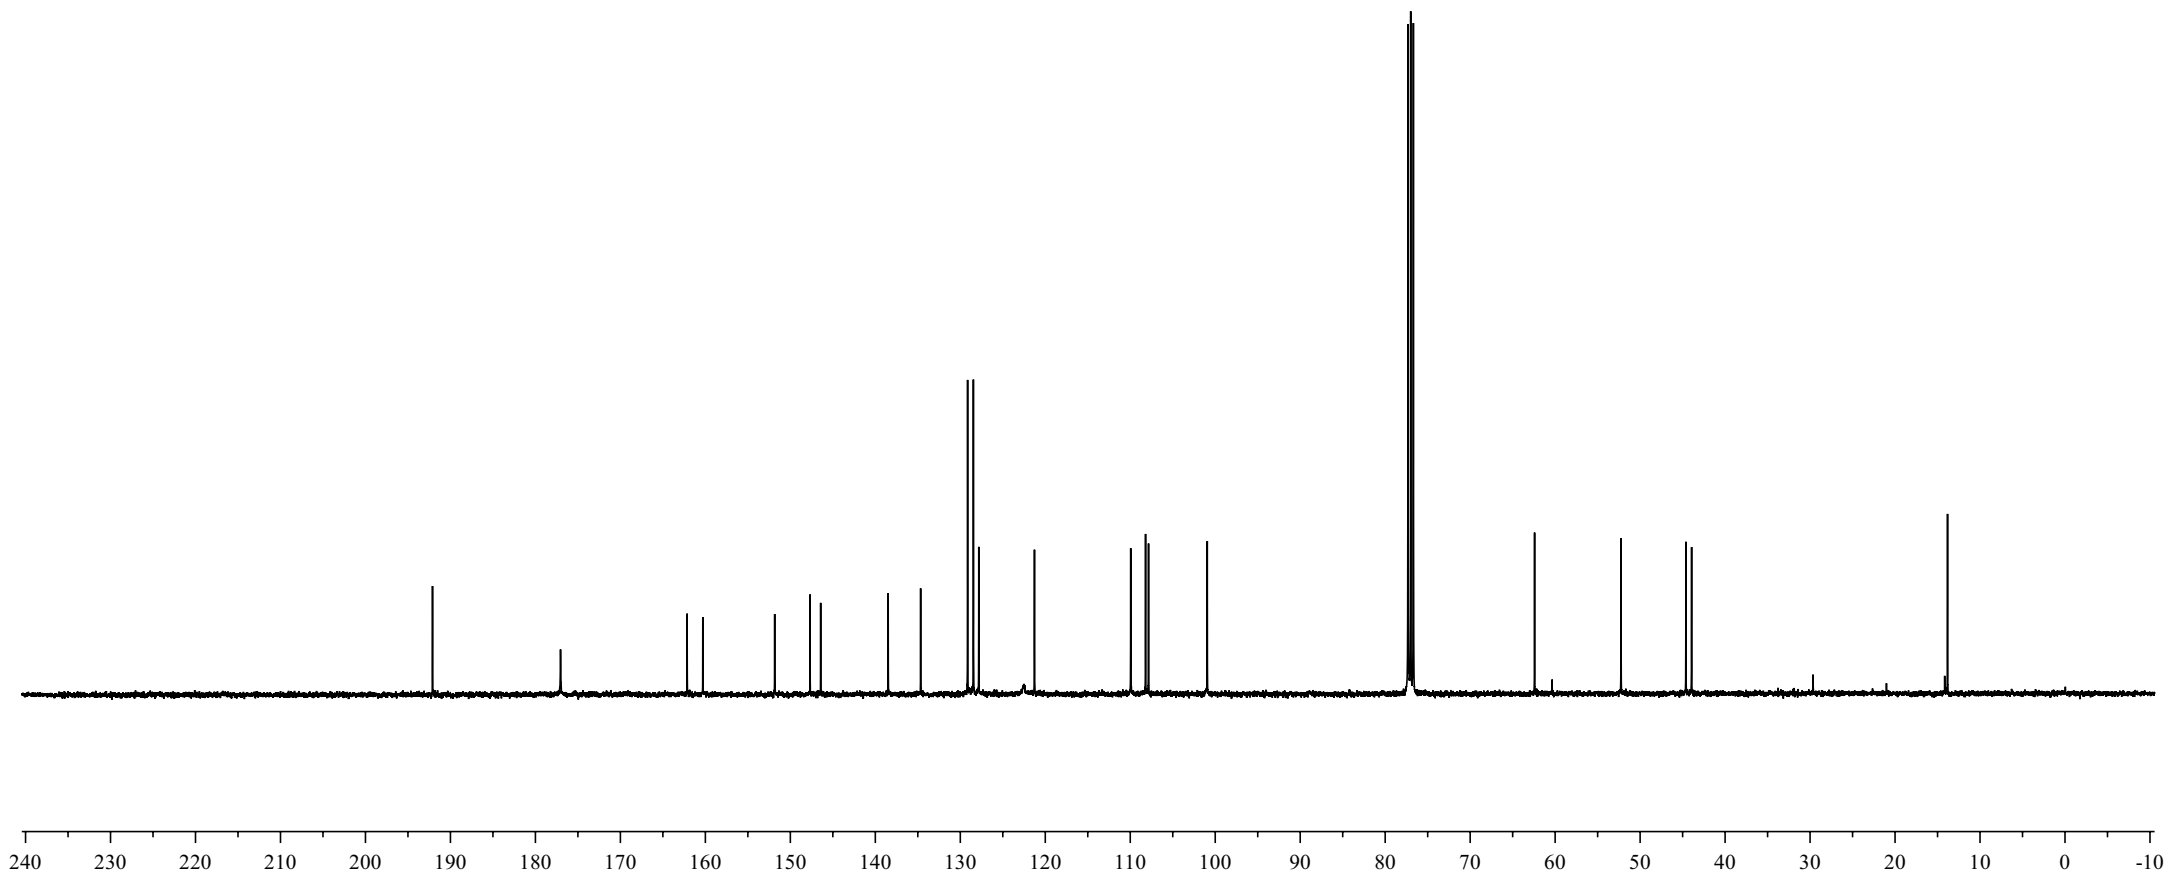

—9.569

7.179  
7.166  
7.161  
7.156  
7.150  
7.122  
7.117  
7.112  
7.108  
7.098  
6.540  
6.526  
6.483  
6.480  
6.470  
6.467  
6.413  
6.407  
5.832  
5.829  
5.821  
5.819

4.270  
4.252  
4.230  
4.227  
4.224  
4.218  
4.215  
4.206  
4.203  
4.197  
4.194  
4.191  
4.066  
4.059  
4.051  
4.043  
4.041  
4.033  
4.025  
3.338  
3.323  
3.309  
3.293  
3.106  
3.098  
3.077  
3.069  
1.297  
1.285  
1.273

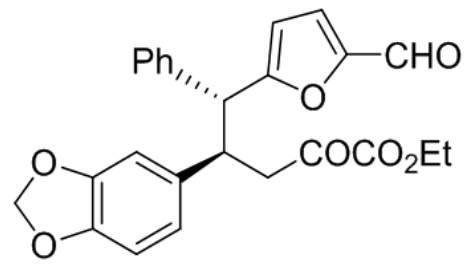

4n'

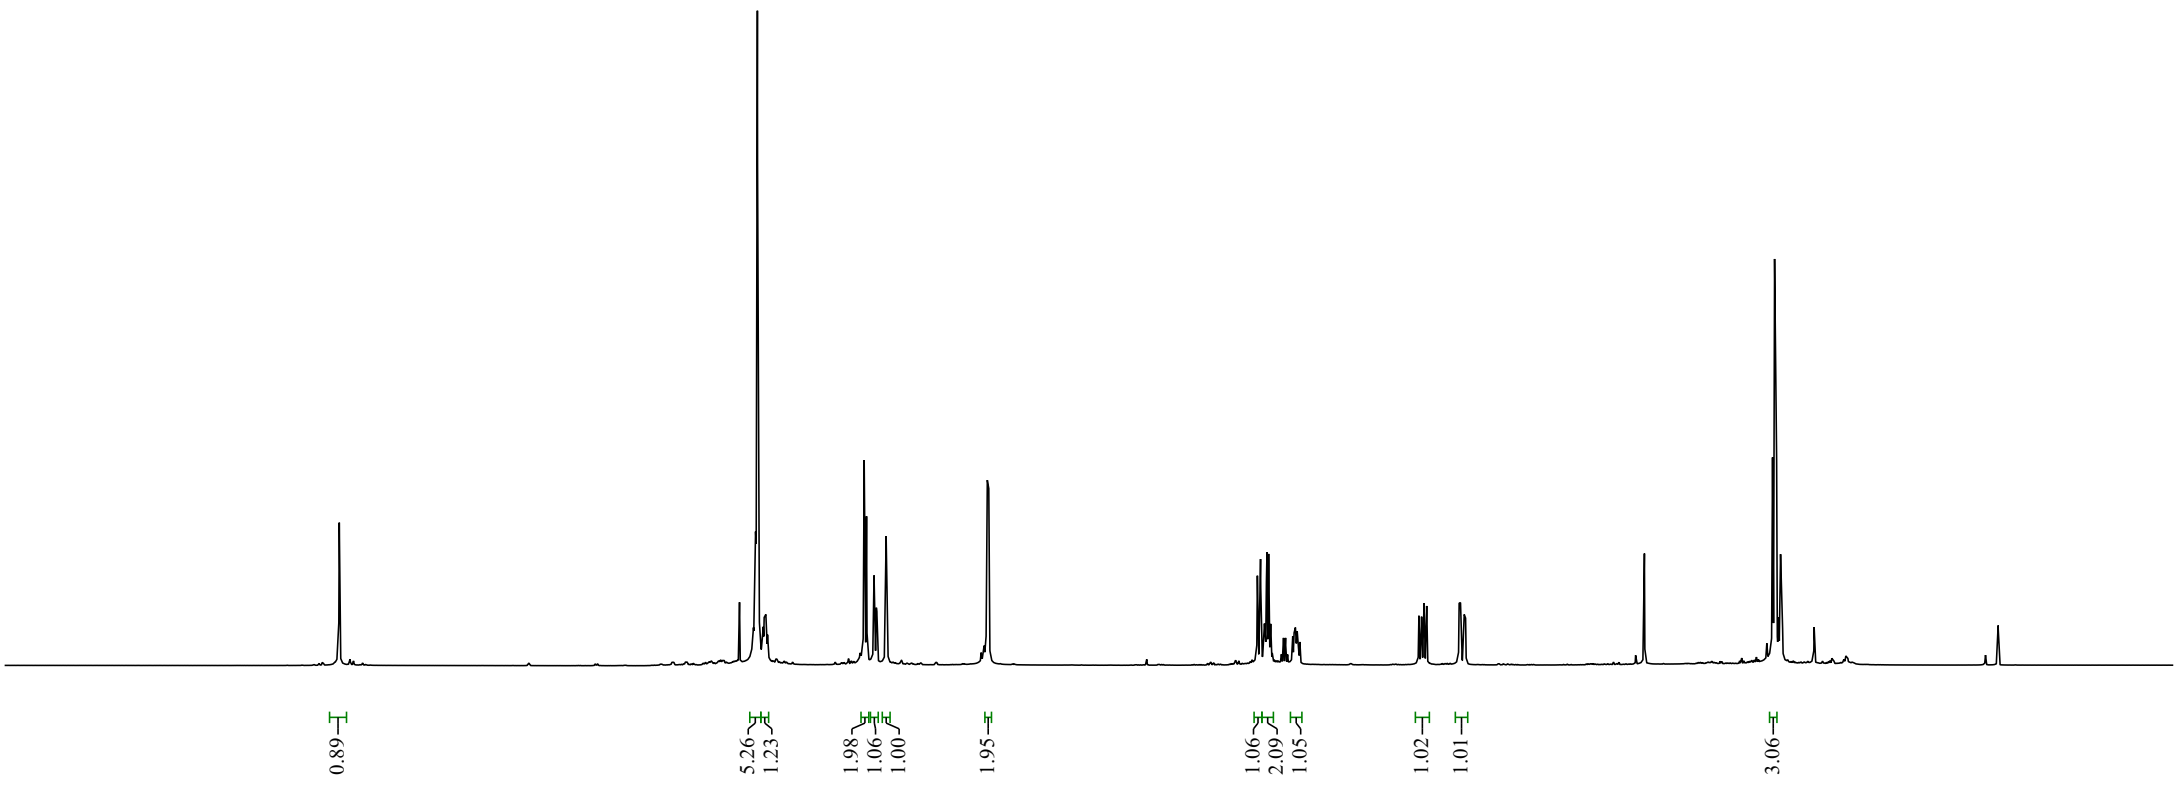

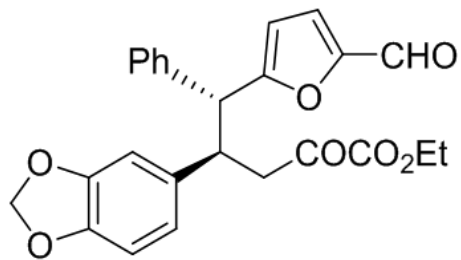

4n'

—191.973

—177.206

—162.381

—160.401

—152.223

—147.484

—146.217

—138.264

—134.105

—128.448

—127.132

—121.568

—110.384

—108.182

—108.018

—100.836

—62.519

—51.772

—44.832

—44.245

—13.850

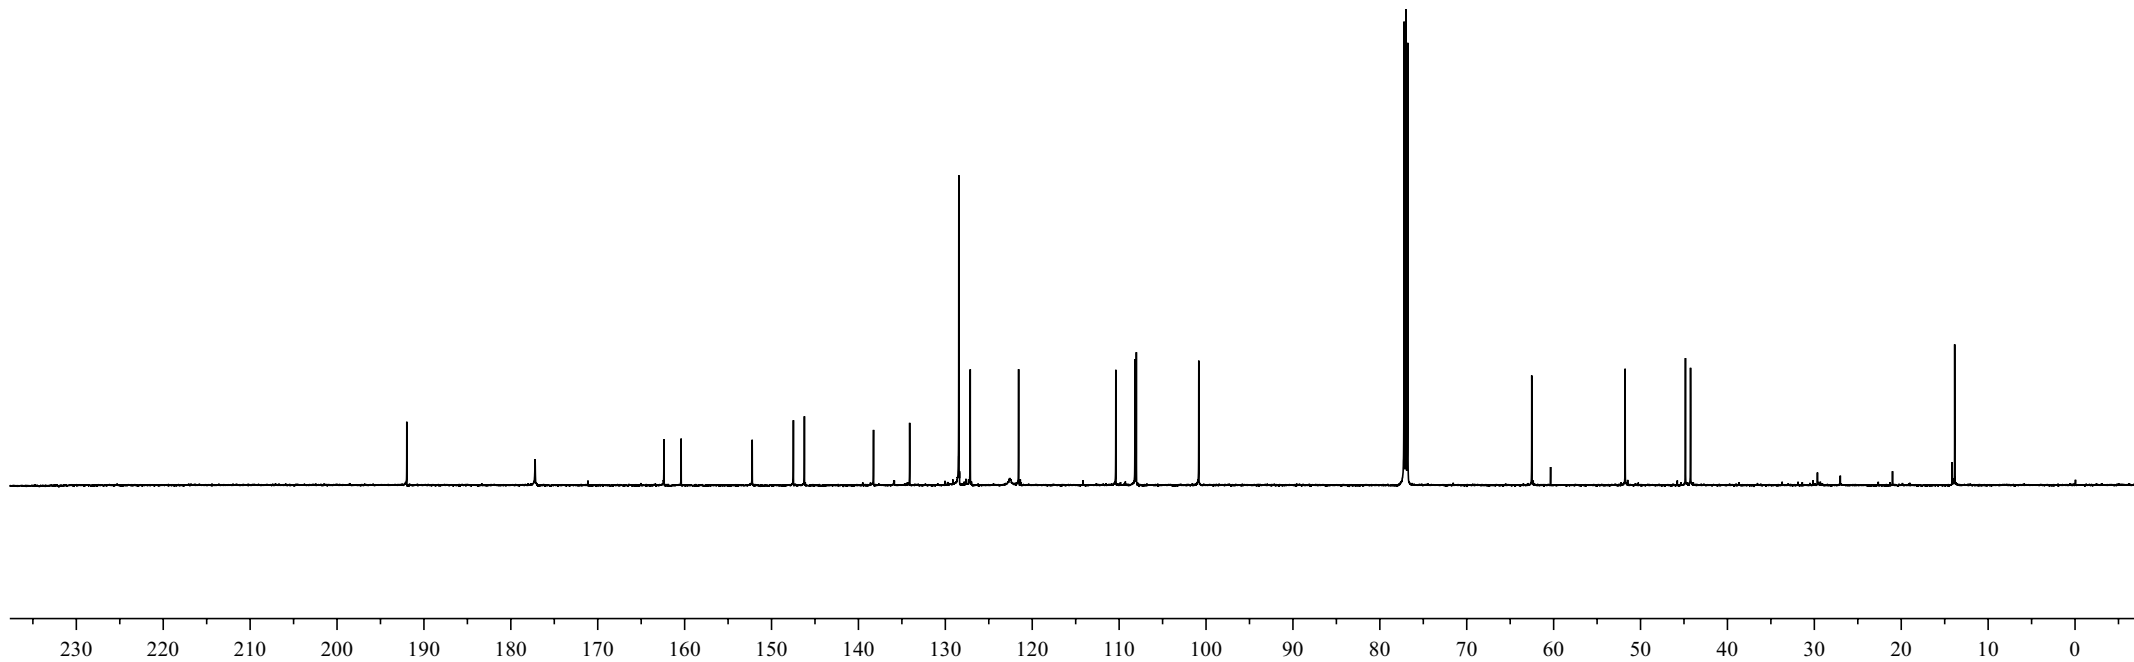

9.374  
7.746  
7.729  
7.722  
7.697  
7.684  
7.510  
7.492  
7.418  
7.402  
7.397  
7.392  
7.384  
7.365  
6.826

6.091  
6.082  
4.470  
4.441  
4.350  
4.335  
4.325  
4.115  
4.112  
4.099  
4.094  
4.082  
4.076  
4.064  
4.058  
3.415  
3.390  
3.371  
3.347  
3.023  
3.013  
2.979  
2.969

1.179  
1.161  
1.143

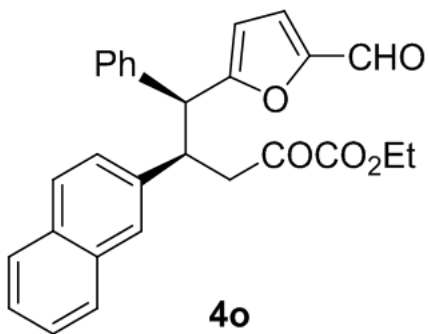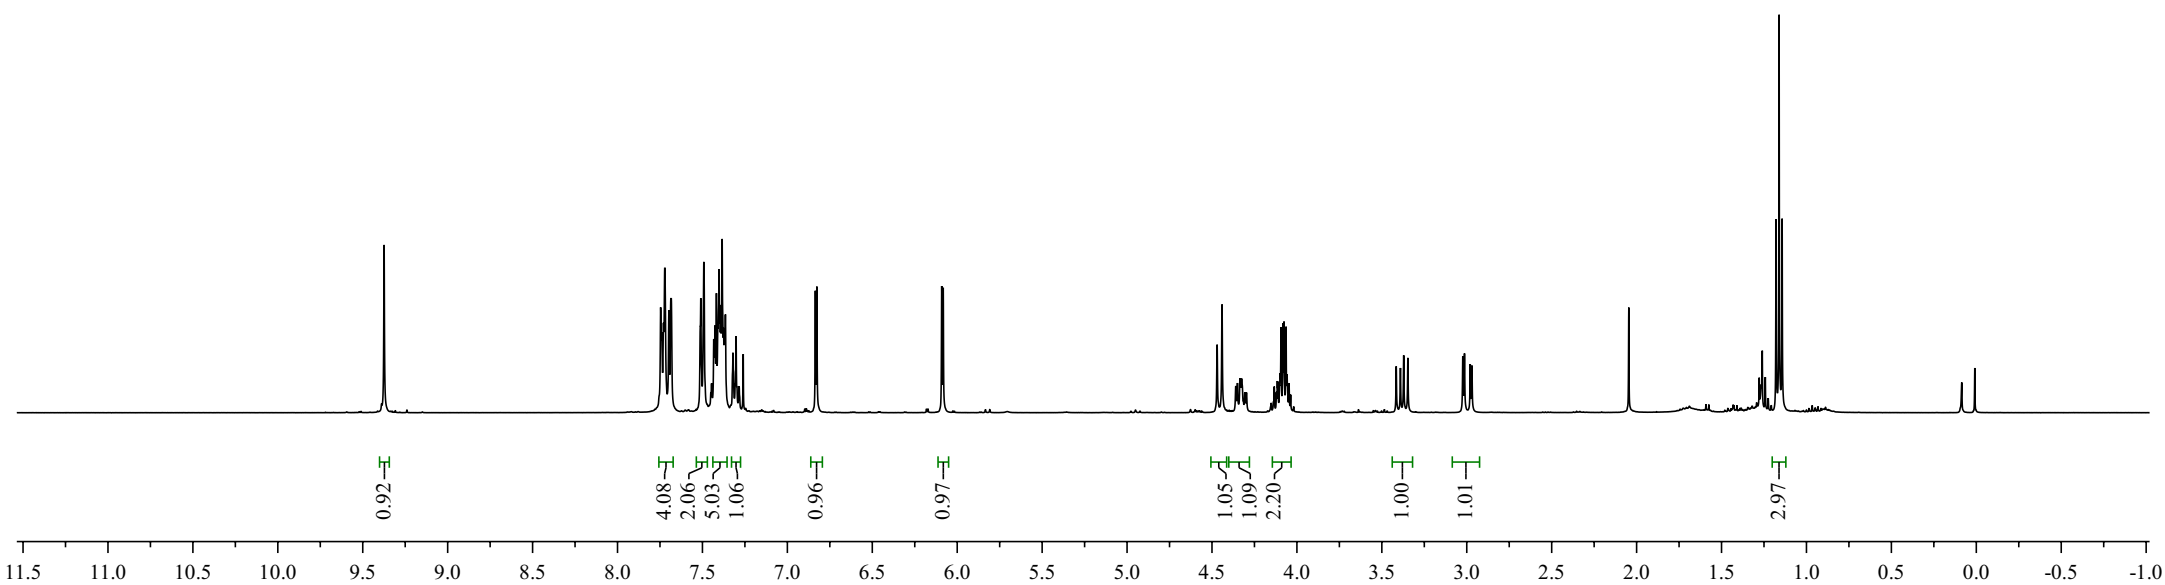



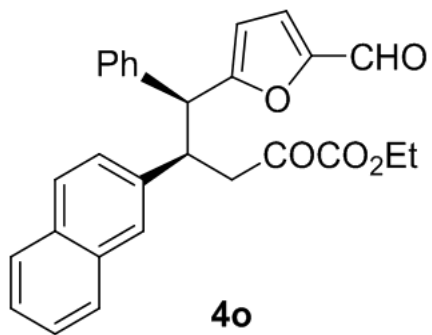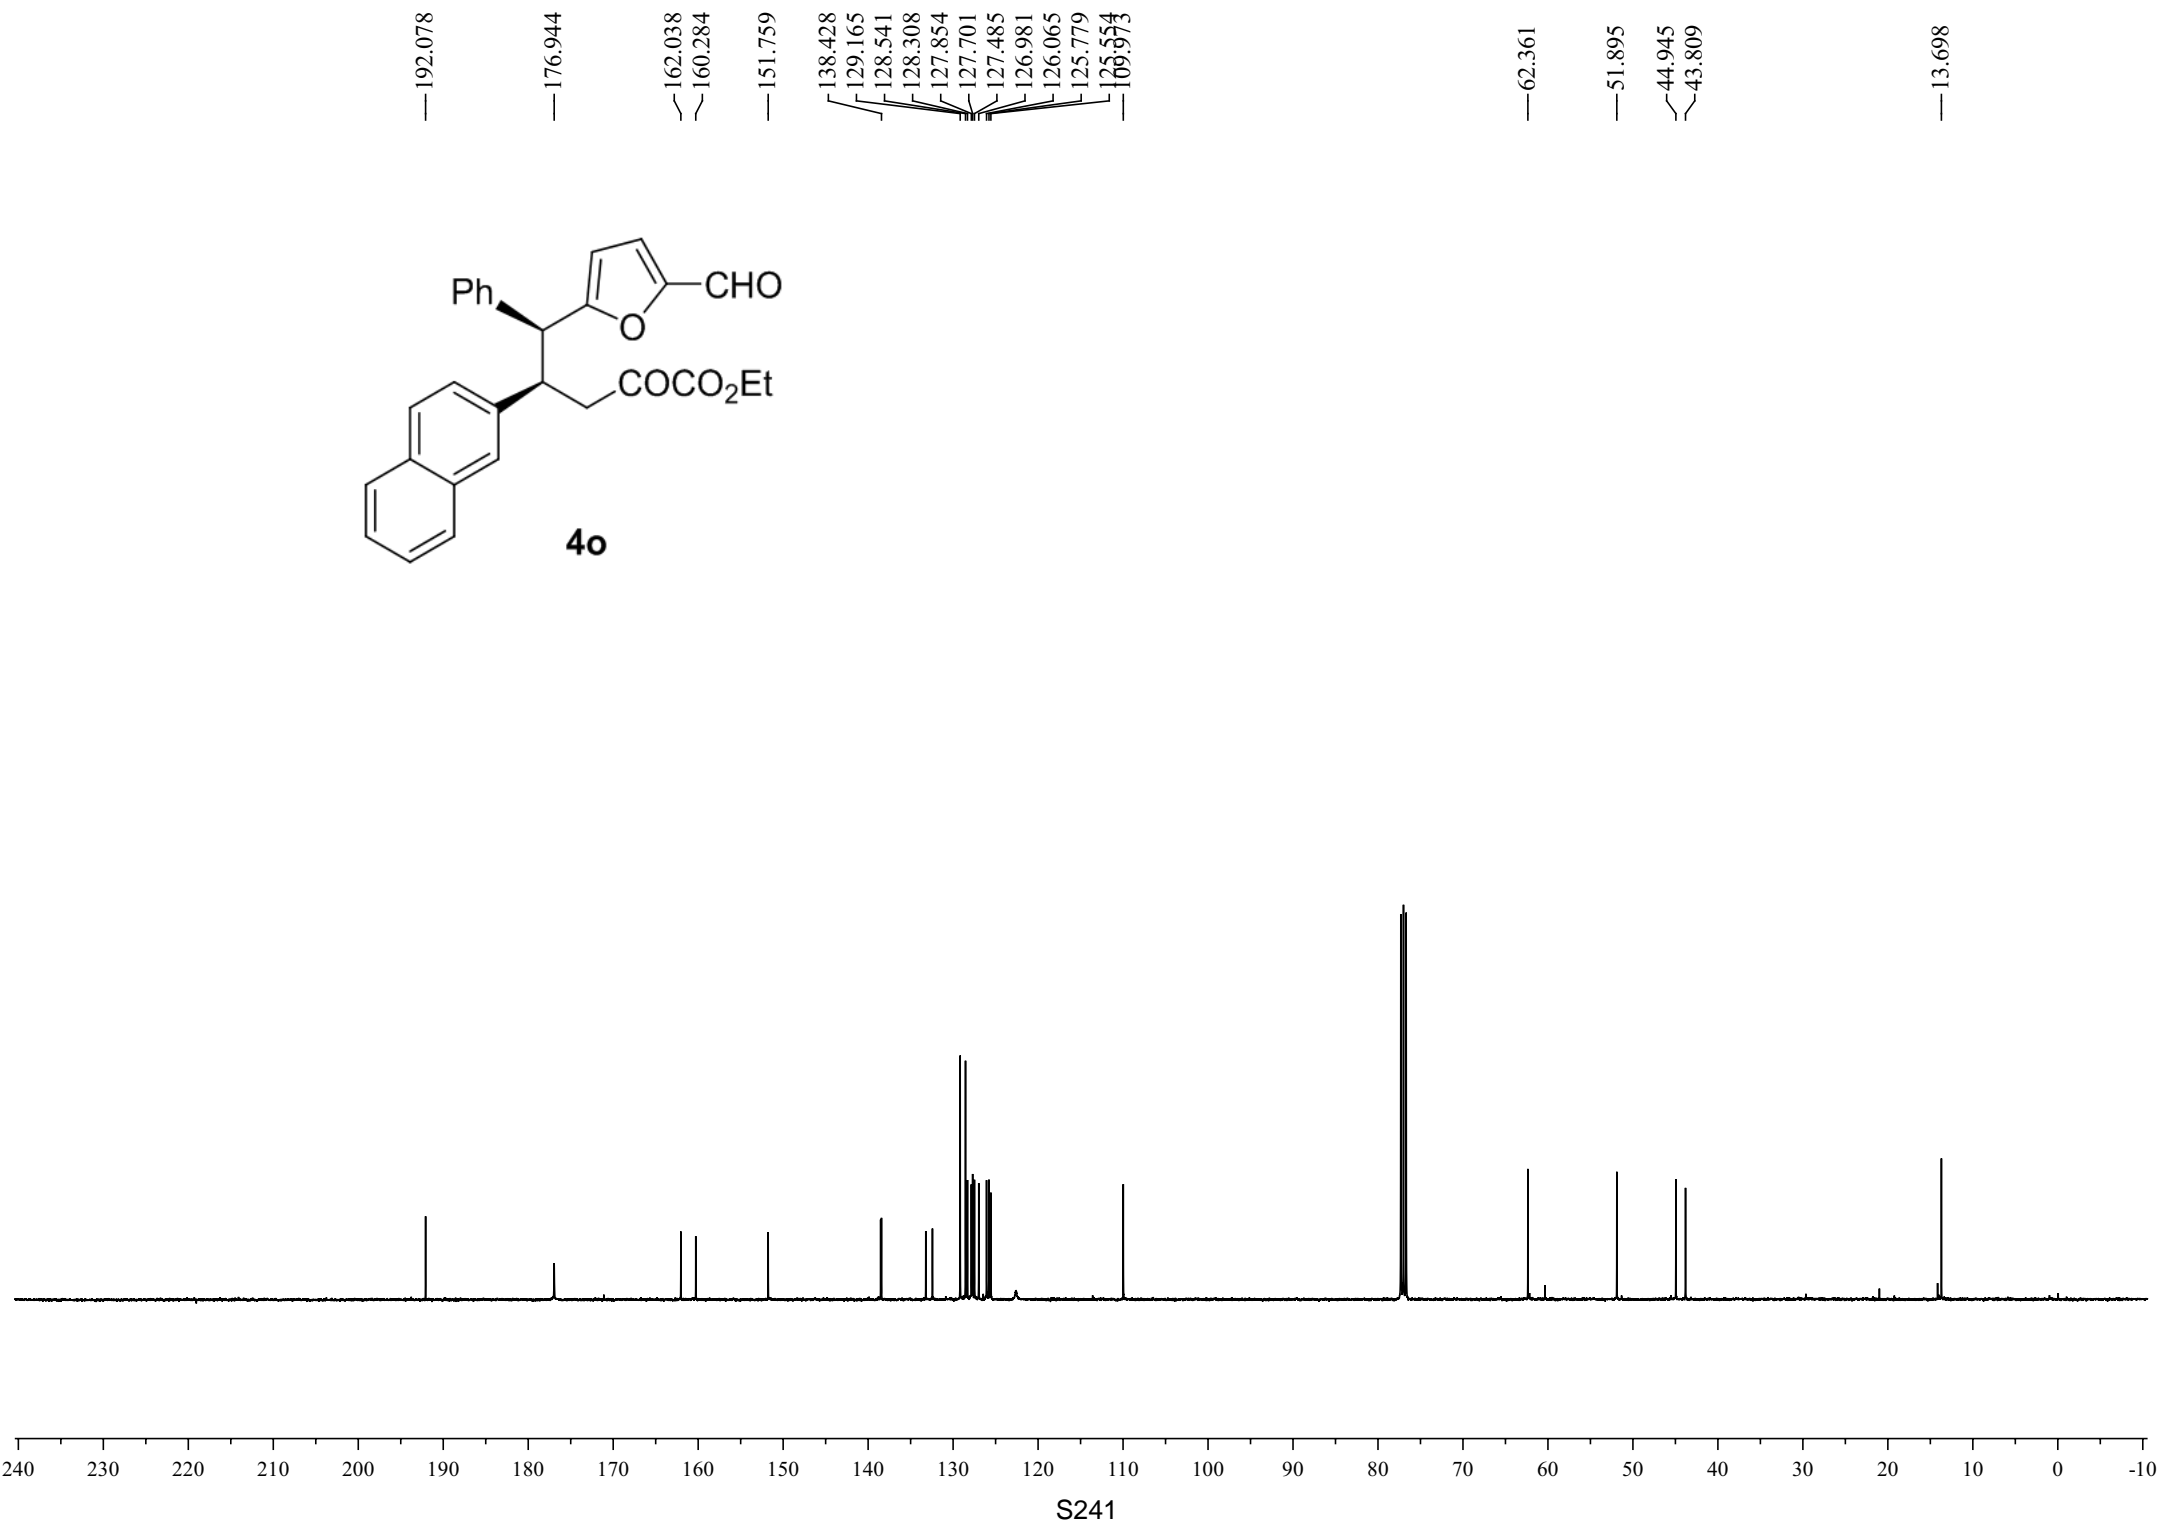

9.601  
 7.681  
 7.641  
 7.620  
 7.499  
 7.401  
 7.395  
 7.386  
 7.377  
 7.219  
 7.196  
 7.176  
 7.173  
 7.164  
 7.118  
 7.101  
 7.082  
 6.974  
 6.944  
 6.435  
 4.499  
 4.472  
 4.341  
 4.331  
 4.319  
 4.315  
 4.173  
 4.163  
 4.155  
 4.145  
 4.137  
 4.127  
 4.119  
 4.109  
 3.540  
 3.517  
 3.496  
 3.485  
 3.473  
 3.254  
 3.242  
 3.210  
 3.198  
 1.223  
 1.205  
 1.187

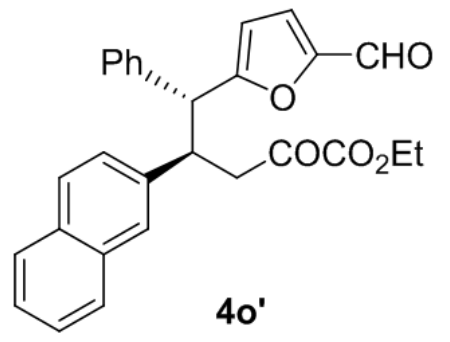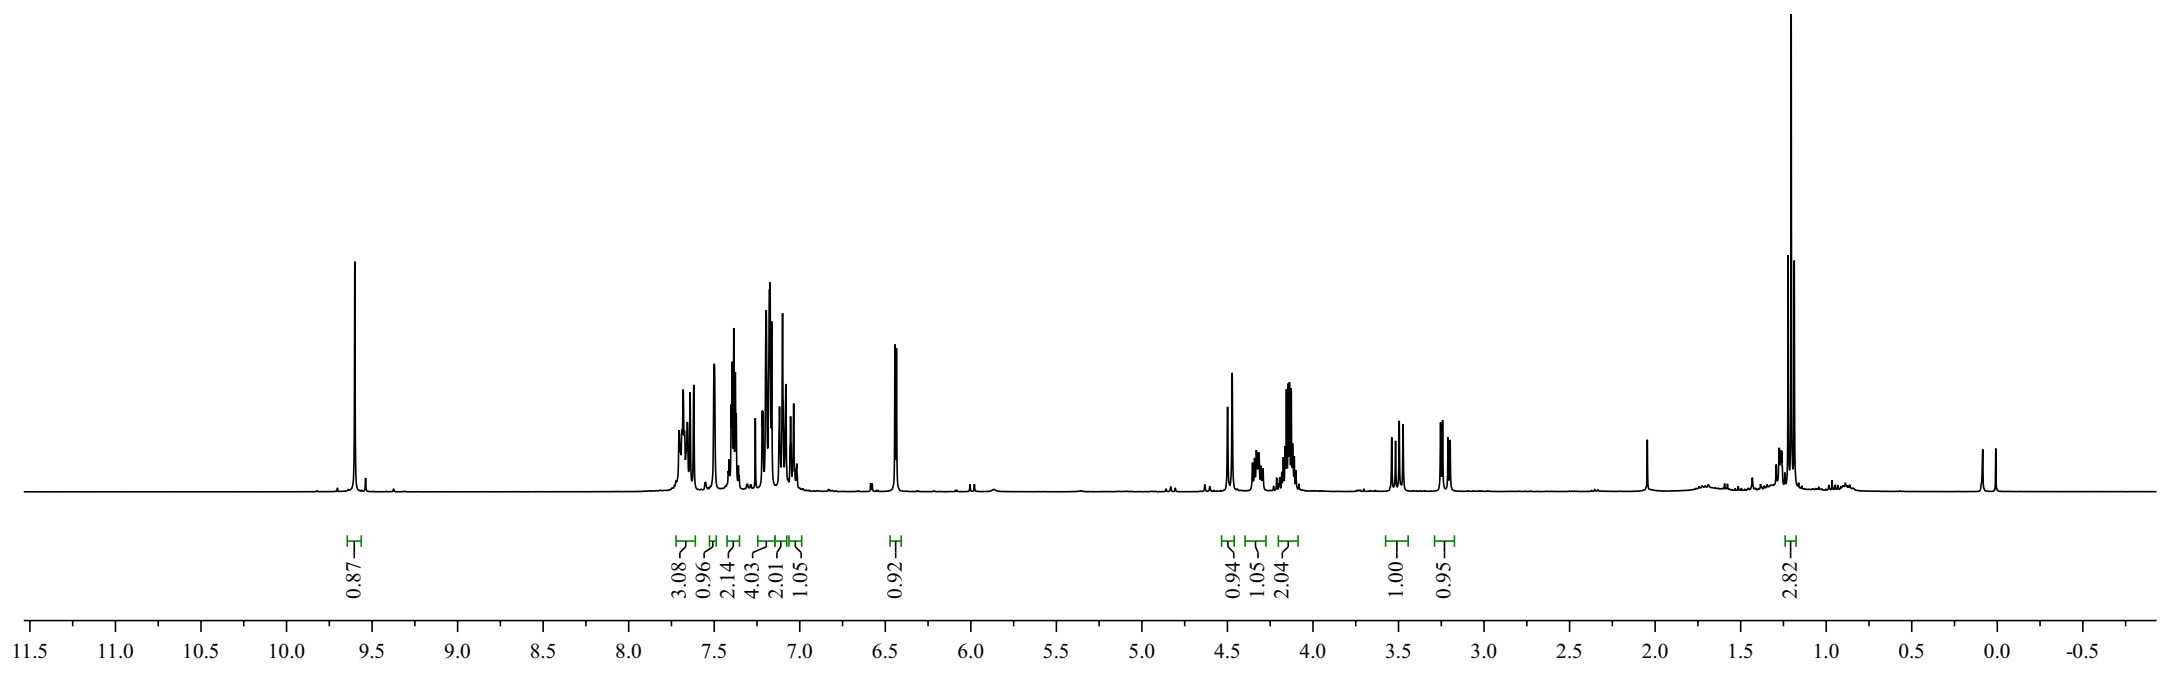

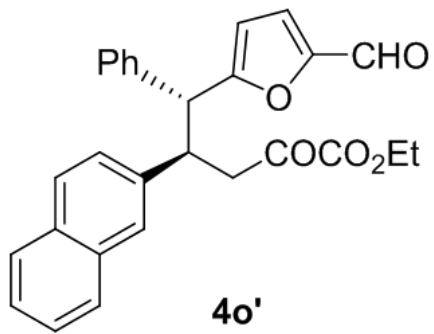

— 191.998

— 177.224

~ 162.425

~ 160.421

— 152.263

138.168

128.465

128.418

128.064

127.645

127.443

127.346

127.143

125.933

125.839

125.668

— 62.476

~ 51.488

~ 45.163

~ 44.080

— 13.742

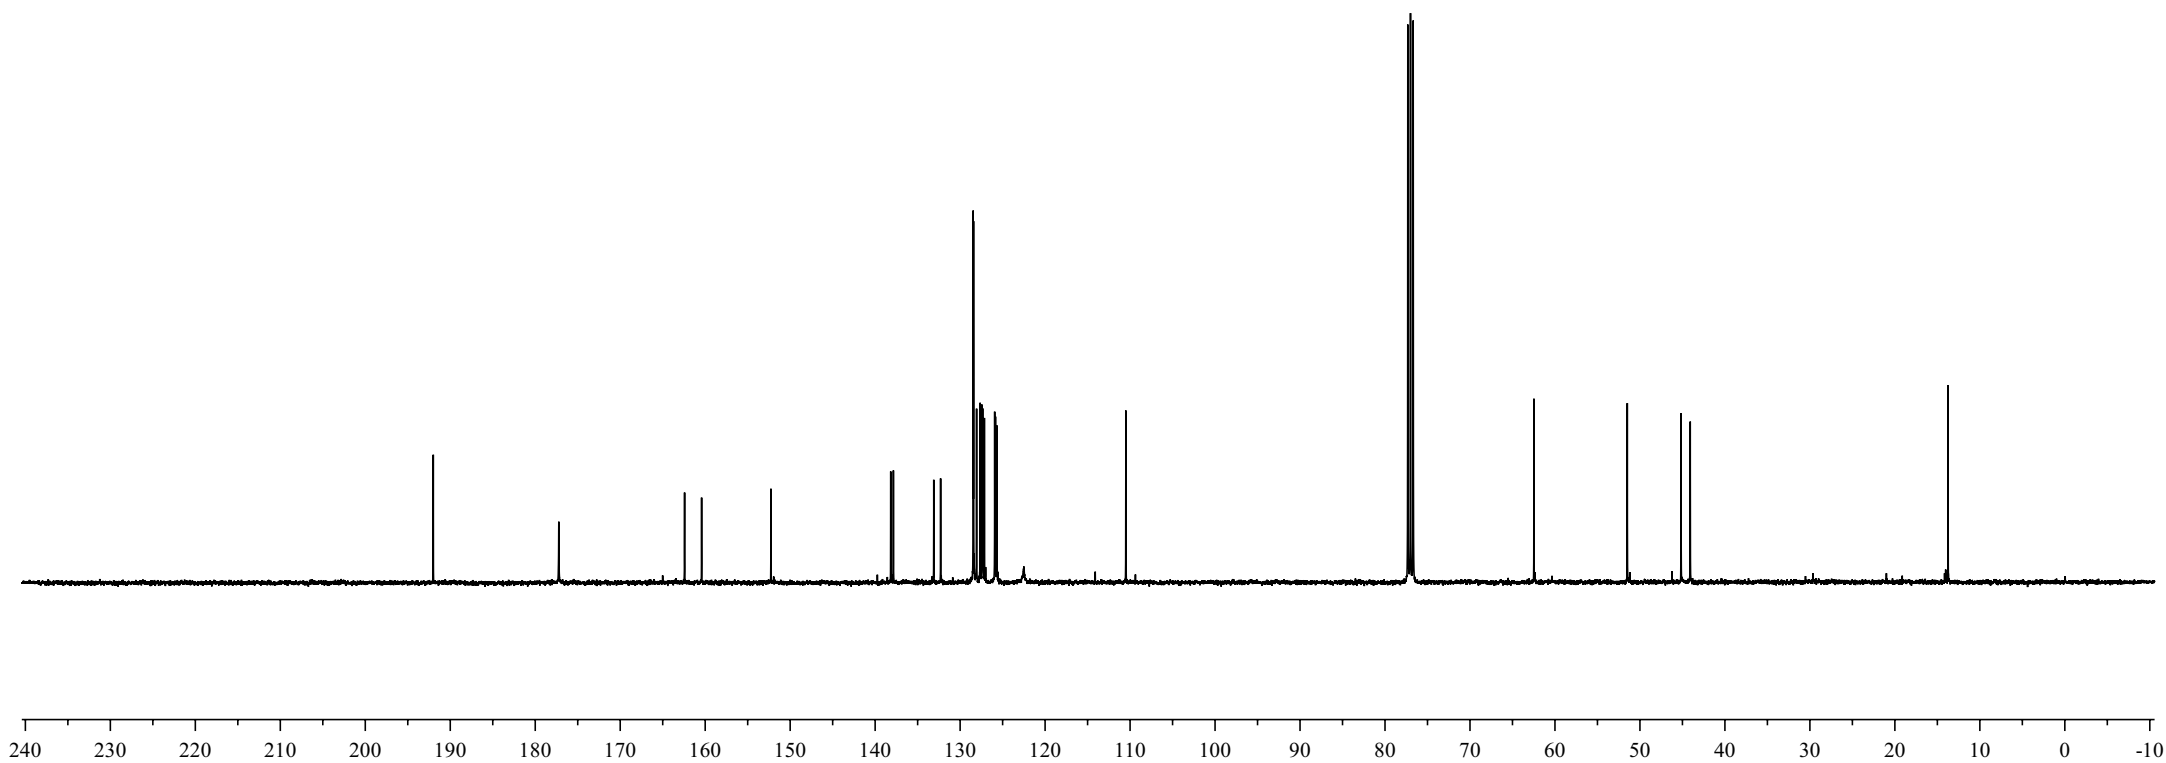

—9.414  
 7.438  
 7.425  
 7.374  
 7.361  
 7.348  
 7.345  
 7.339  
 7.288  
 7.276  
 7.264  
 6.566  
 6.560  
 6.231  
 6.228  
 6.226  
 6.223  
 6.068  
 6.062  
 4.545  
 4.526  
 4.127  
 4.115  
 4.103  
 4.091  
 3.213  
 3.196  
 3.184  
 3.167  
 2.859  
 2.852  
 2.830  
 2.823  
 1.194  
 1.183  
 1.171

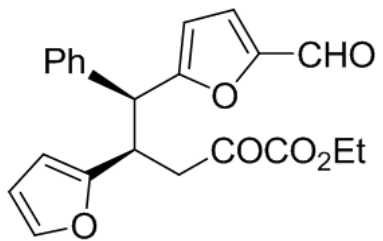

**4p**

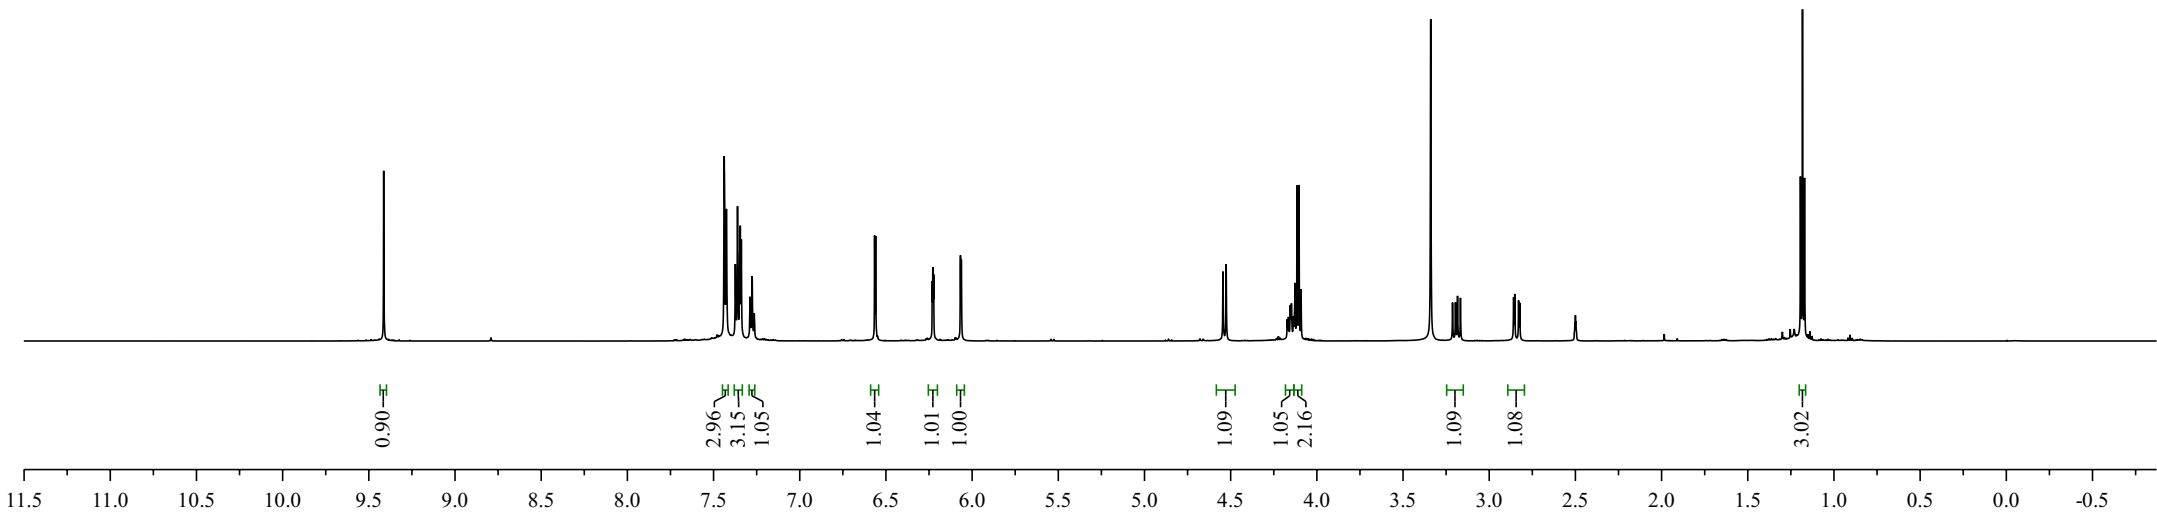



4p

—191.543

—177.543

—162.201

—159.709

—154.132

—151.367

—141.754

—138.644

—128.894

—128.405

—127.533

—110.224

—109.825

—106.803

—61.766

—48.828

—40.975

—37.799

—13.704

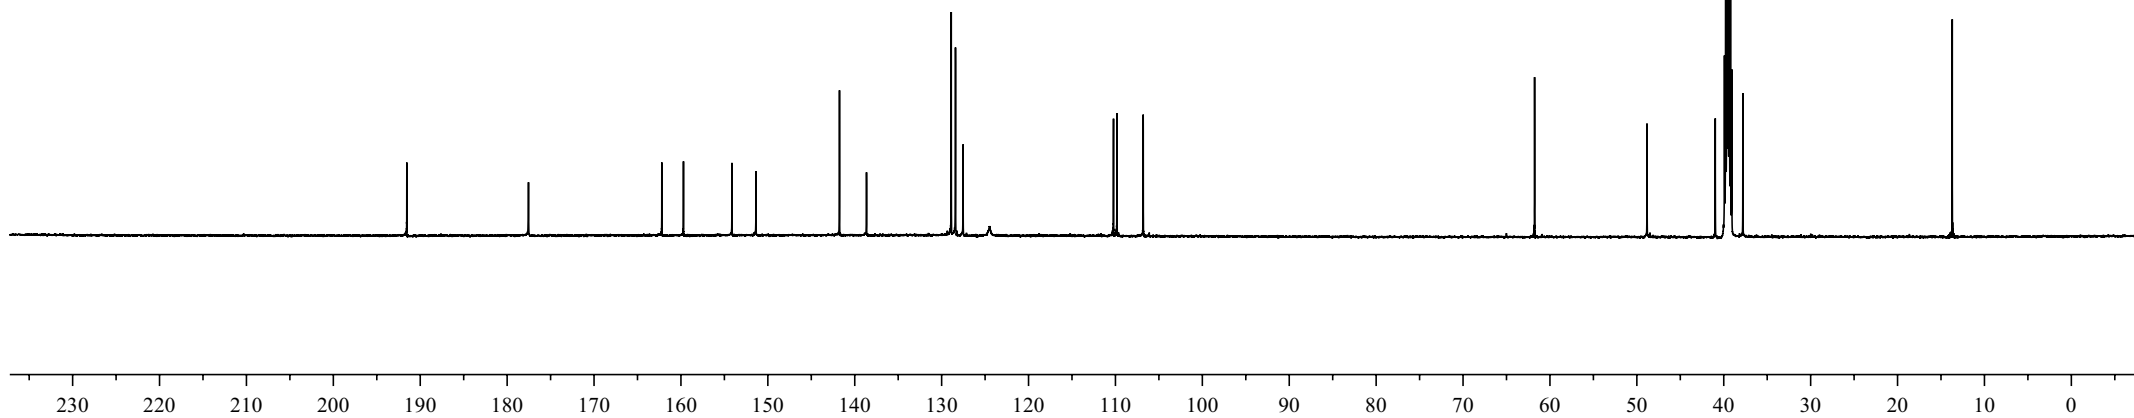

9.515

7.477  
7.471  
7.362  
7.361  
7.227  
7.215  
7.203  
7.181  
7.169  
7.156  
7.144  
6.681  
6.675  
6.148  
6.145  
6.143  
6.140  
5.906  
5.901

4.557  
4.541  
4.172  
4.160  
4.148  
4.137  
3.314  
3.298  
3.285  
3.269  
3.074  
3.067  
3.045  
3.038

1.228  
1.217  
1.205

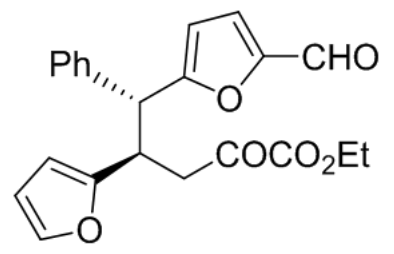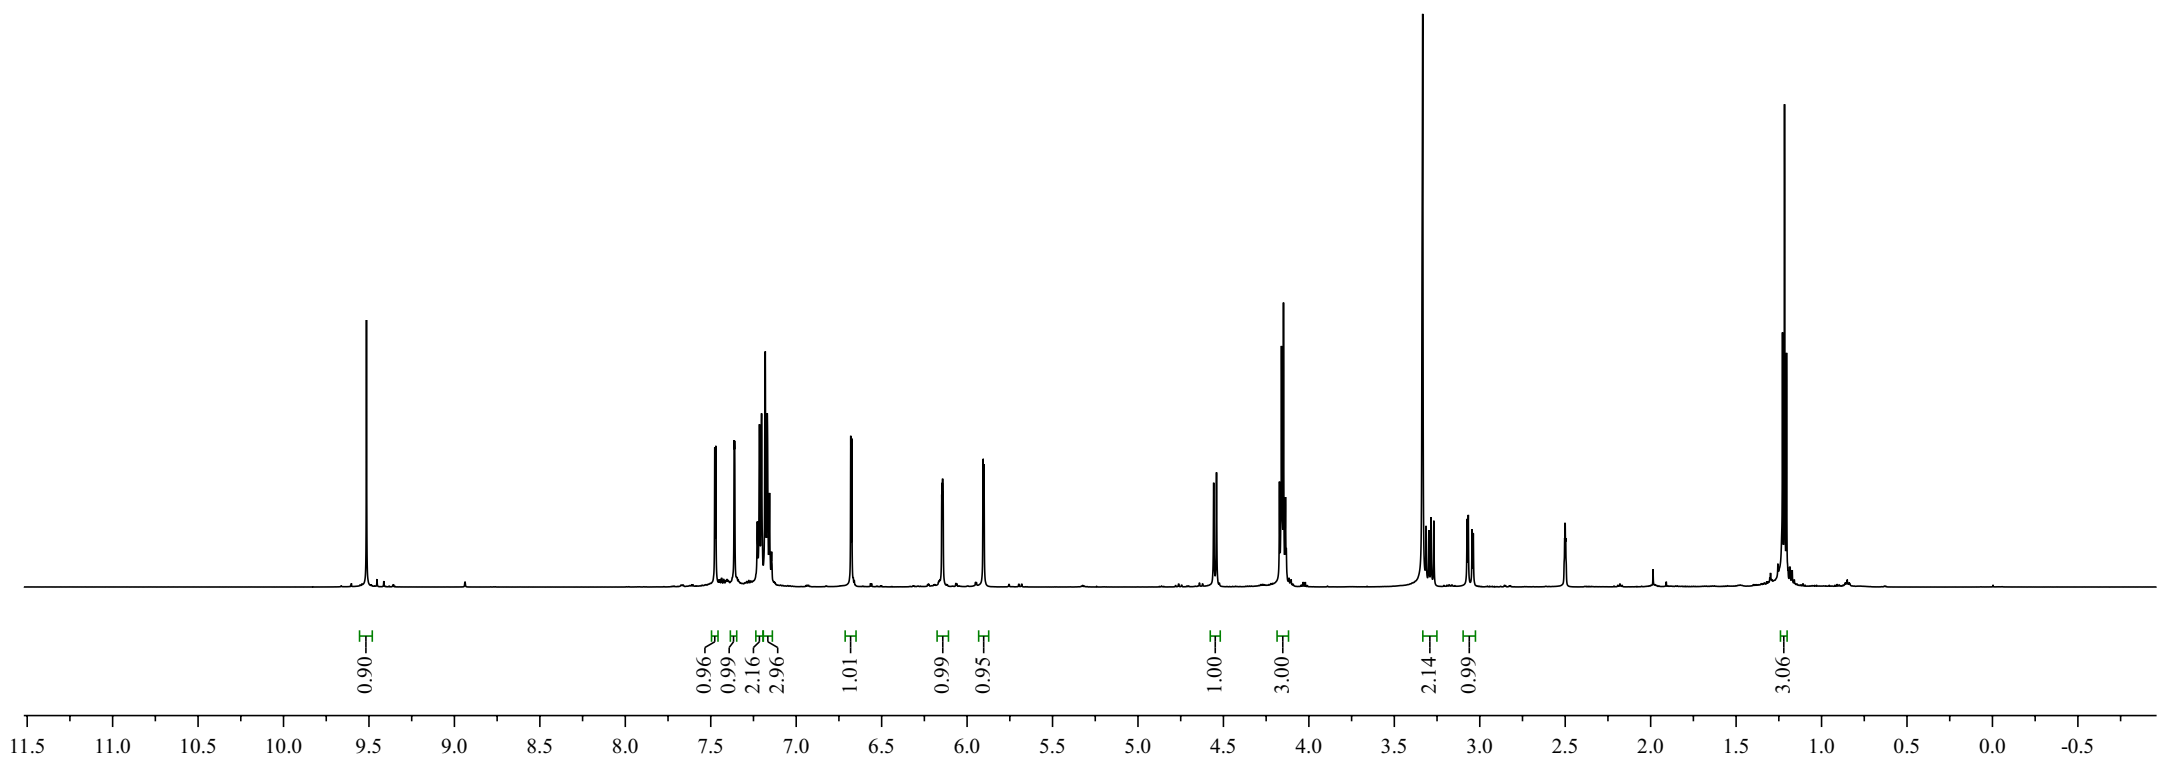

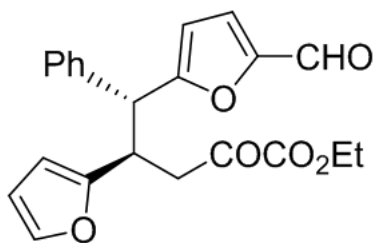

4p'

—191.755

—178.162

—162.207

—160.210

—153.918

—152.270

—142.005

—138.952

—128.681

—127.453

—111.137

—110.511

—107.636

—62.229

—49.150

—41.621

—38.232

—14.143

230 220 210 200 190 180 170 160 150 140 130 120 110 100 90 80 70 60 50 40 30 20 10 0

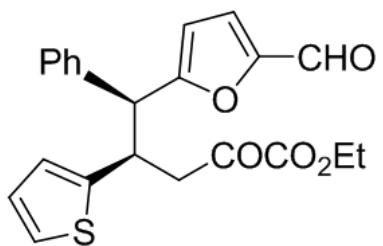

4q

7.505  
7.493  
7.383  
7.370  
7.357  
7.297  
7.291  
7.278  
7.265  
7.246  
7.244  
7.237  
7.236  
6.943  
6.942  
6.938  
6.936  
6.835  
6.829  
6.826  
6.820  
6.554  
6.548  
4.545  
4.525  
4.374  
4.368  
4.356  
4.350  
4.338  
4.112  
4.100  
4.088  
4.076  
3.275  
3.263  
3.246  
2.892  
2.885  
2.863  
2.856  
1.179  
1.167  
1.155

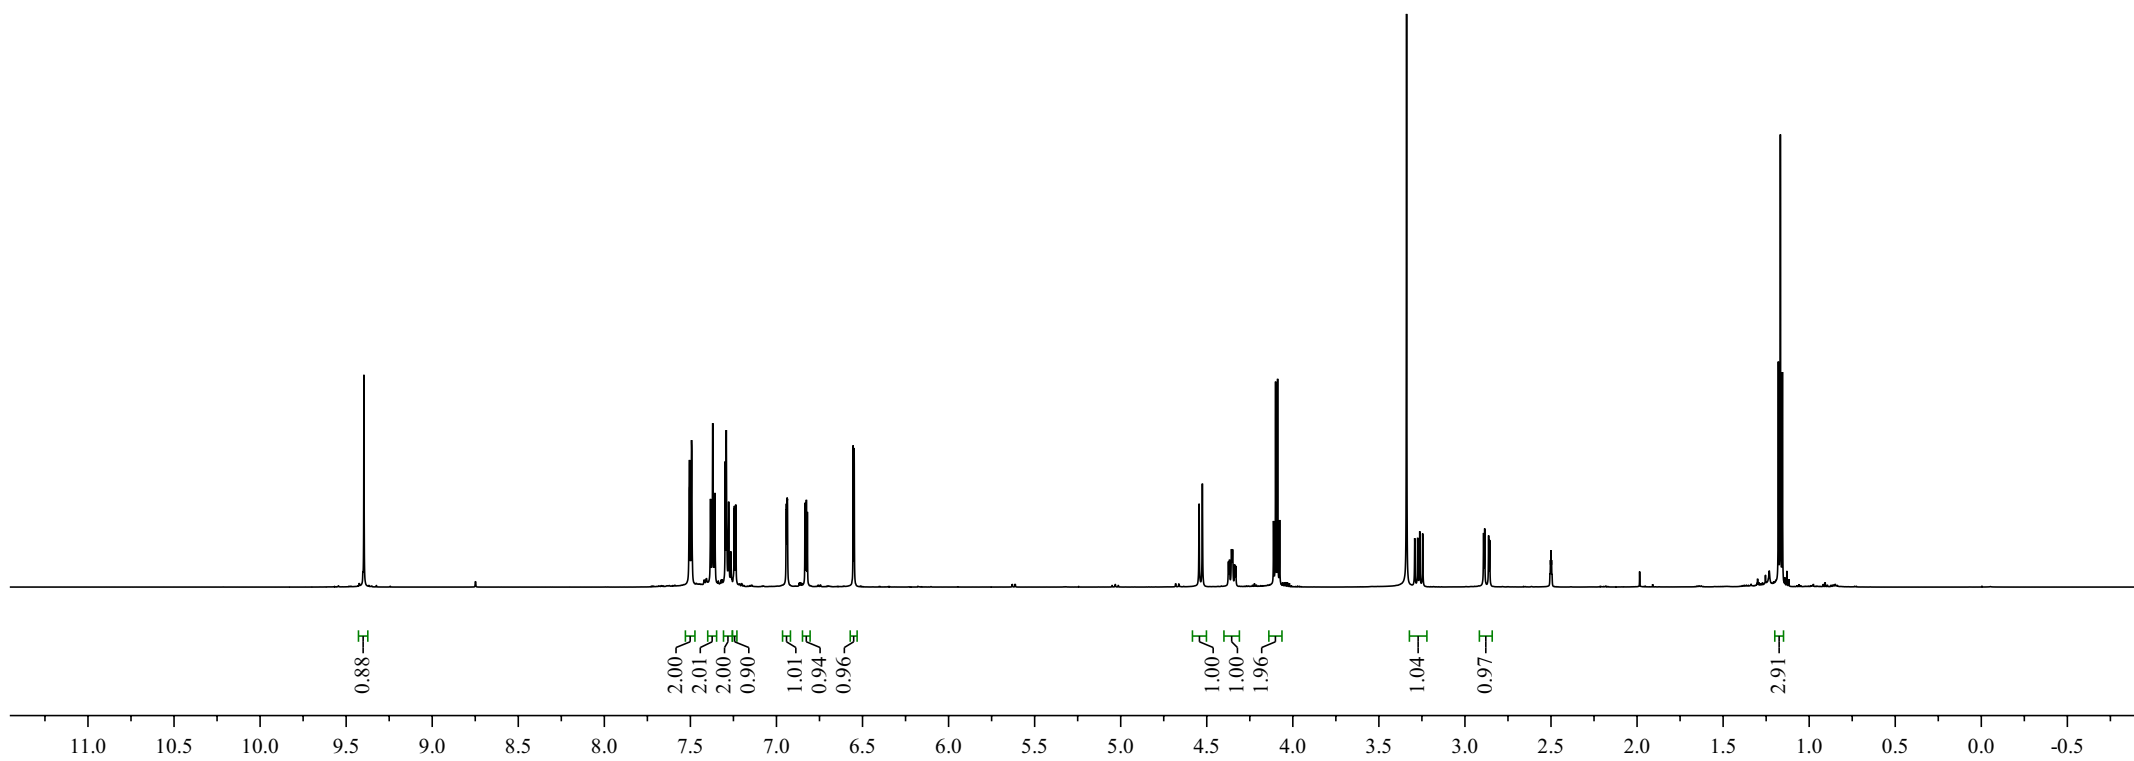



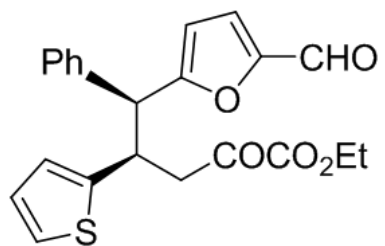

4q

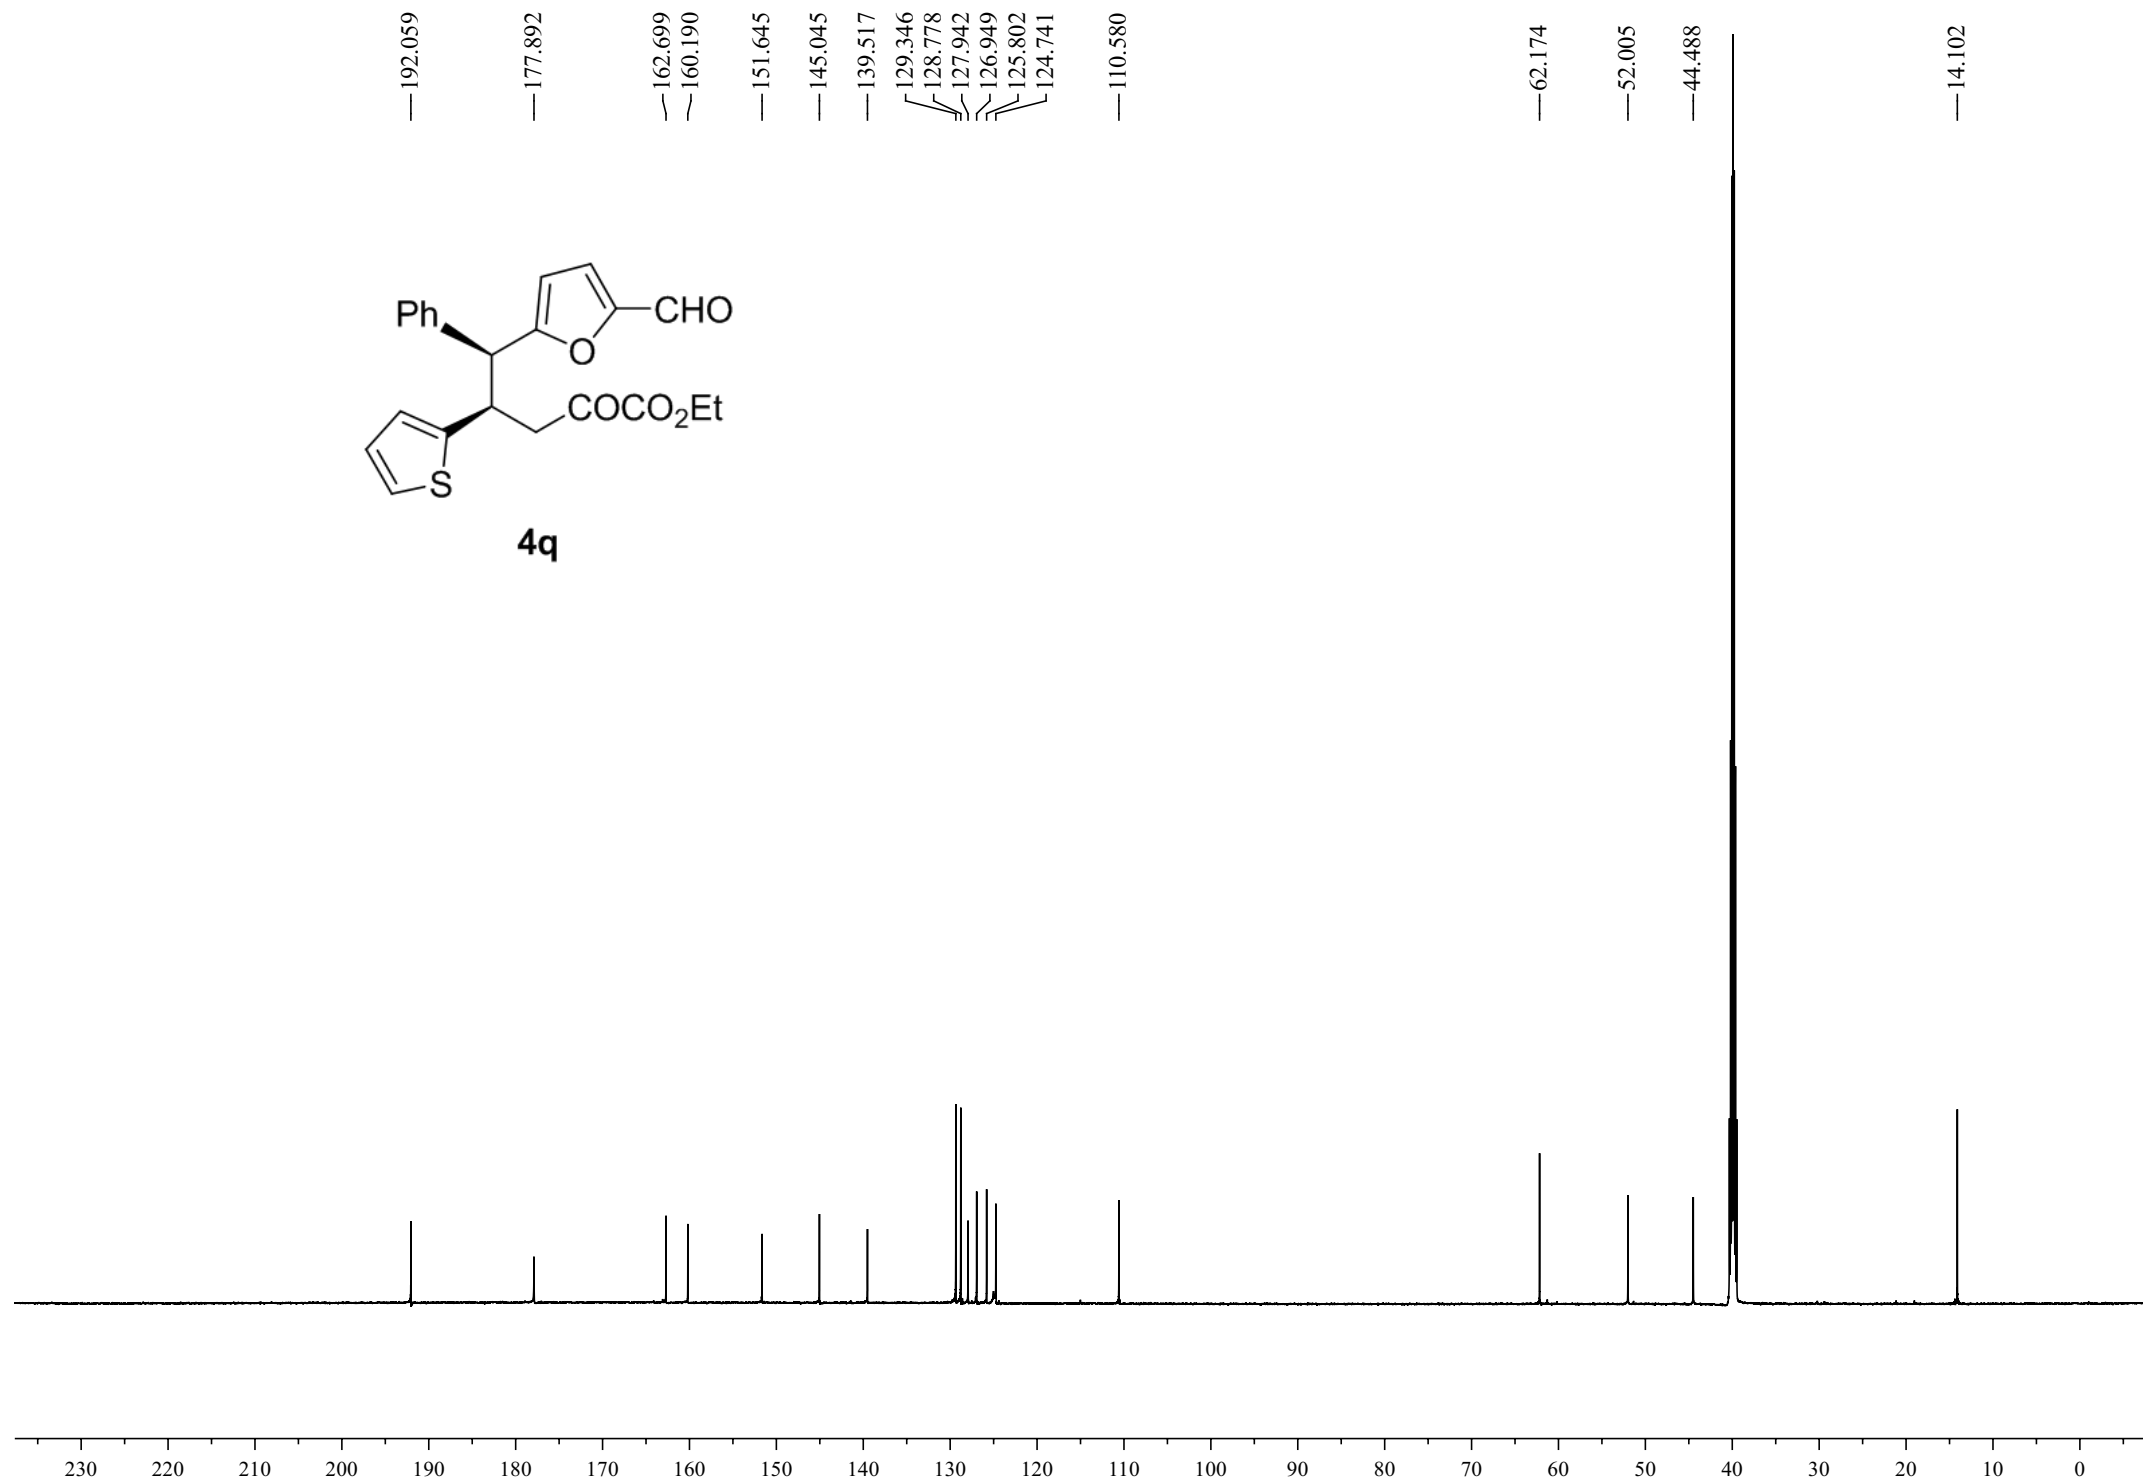

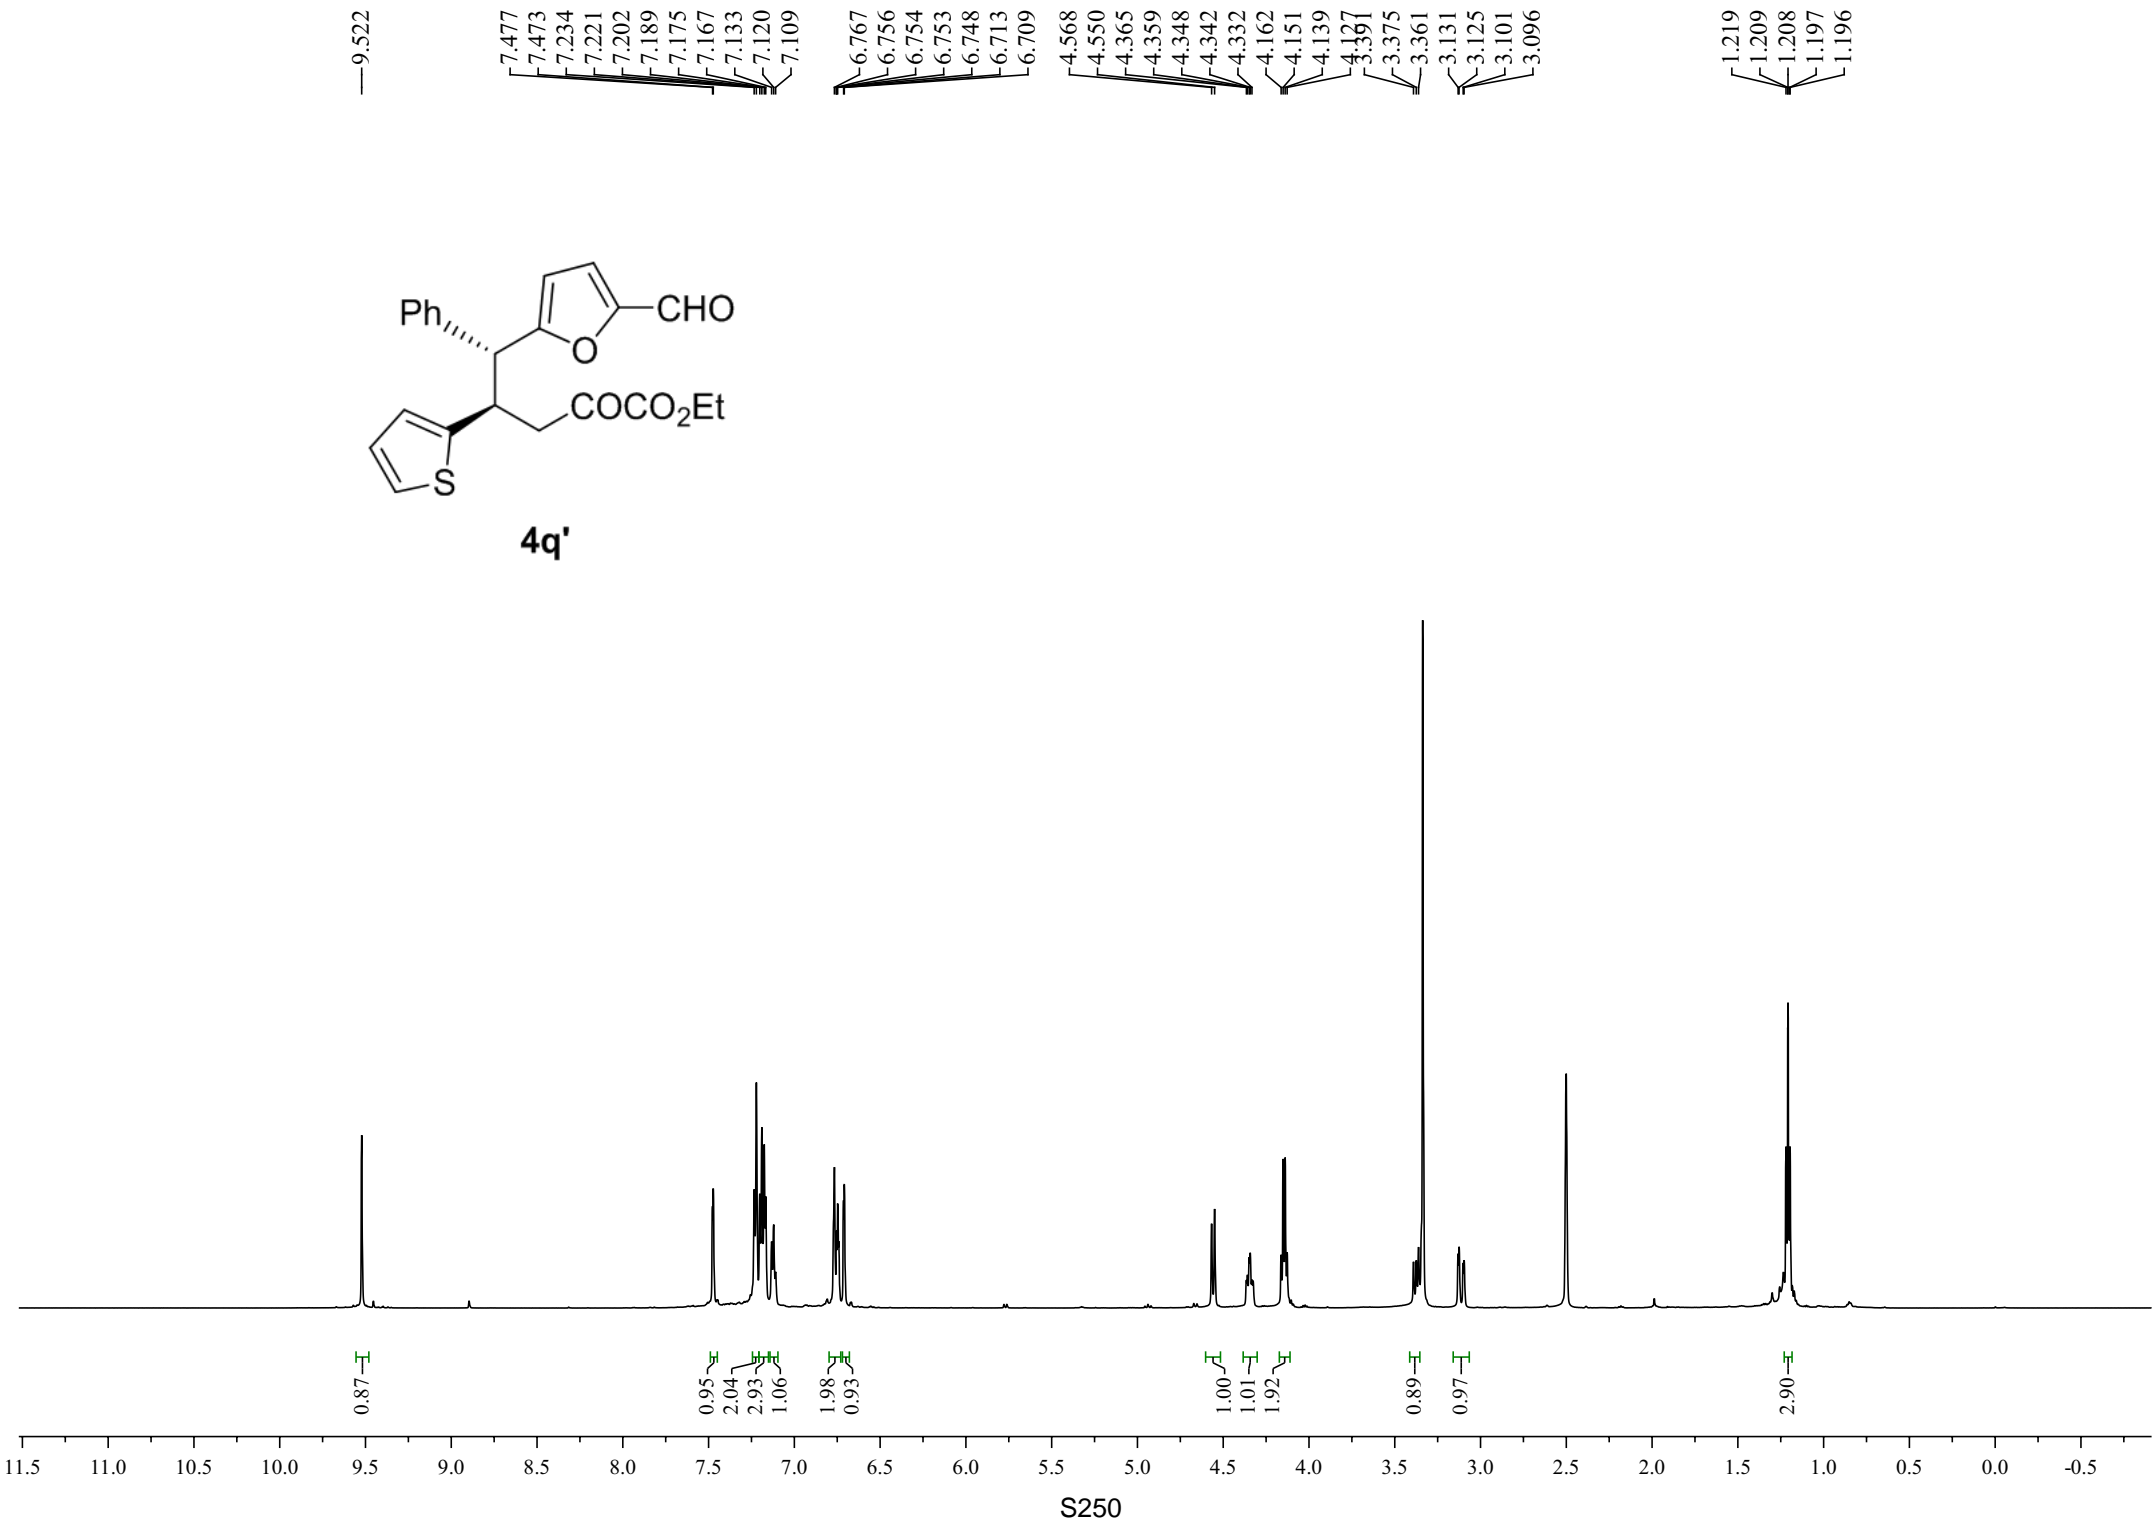

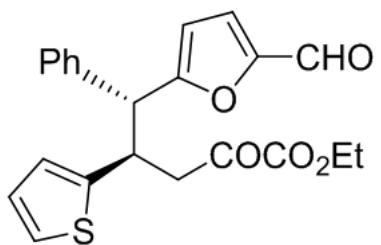

4q'

—191.744  
—178.156  
~162.298  
~160.252  
—152.240  
—144.387  
—139.110  
128.898  
128.651  
127.350  
126.806  
126.007  
124.677  
—111.193

—62.233

—51.424

—44.769

—14.133

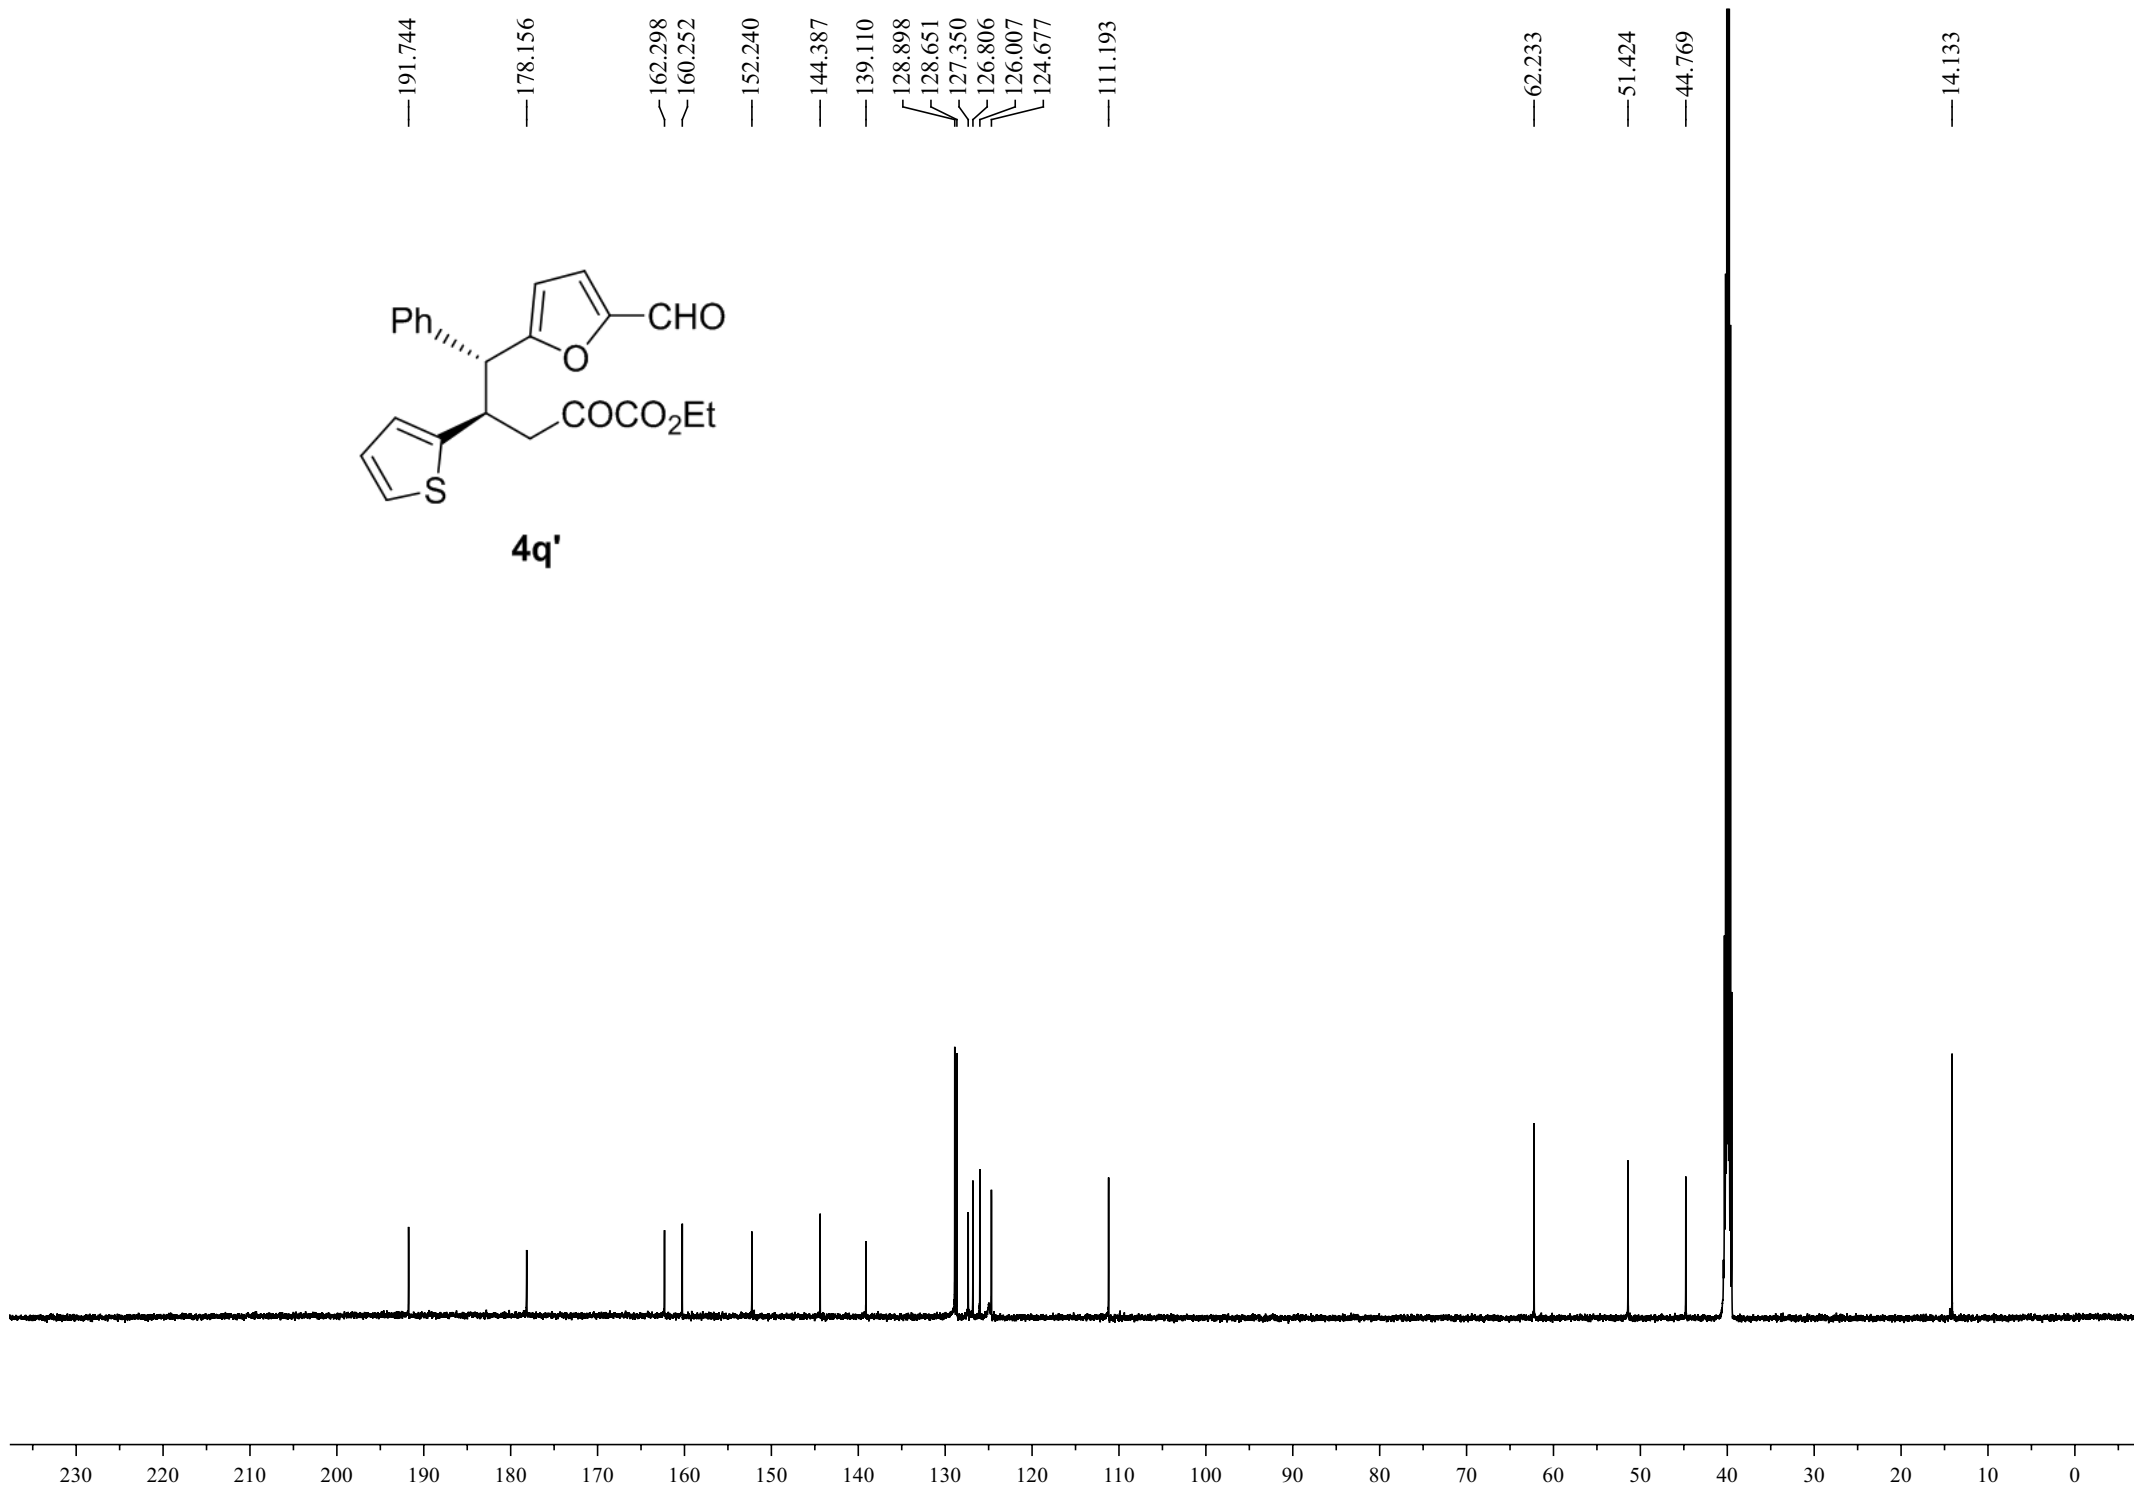

7.457  
7.454  
7.436  
7.368  
7.350  
7.330  
7.194  
7.177  
7.158  
7.110  
7.107  
7.092  
7.086  
7.080  
7.077  
7.059  
6.339  
6.310  
6.295  
6.267  
5.872  
5.869  
5.769  
5.481  
5.478  
5.093  
5.016  
5.013  
4.988  
4.985  
4.129  
4.106  
4.088  
4.079  
3.733  
3.724  
3.705  
3.696  
3.678  
3.668  
2.649  
2.641  
2.615  
2.606  
2.420  
2.392  
2.386  
2.357  
1.246  
1.228  
1.210

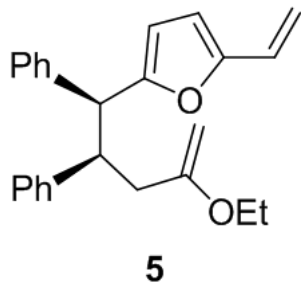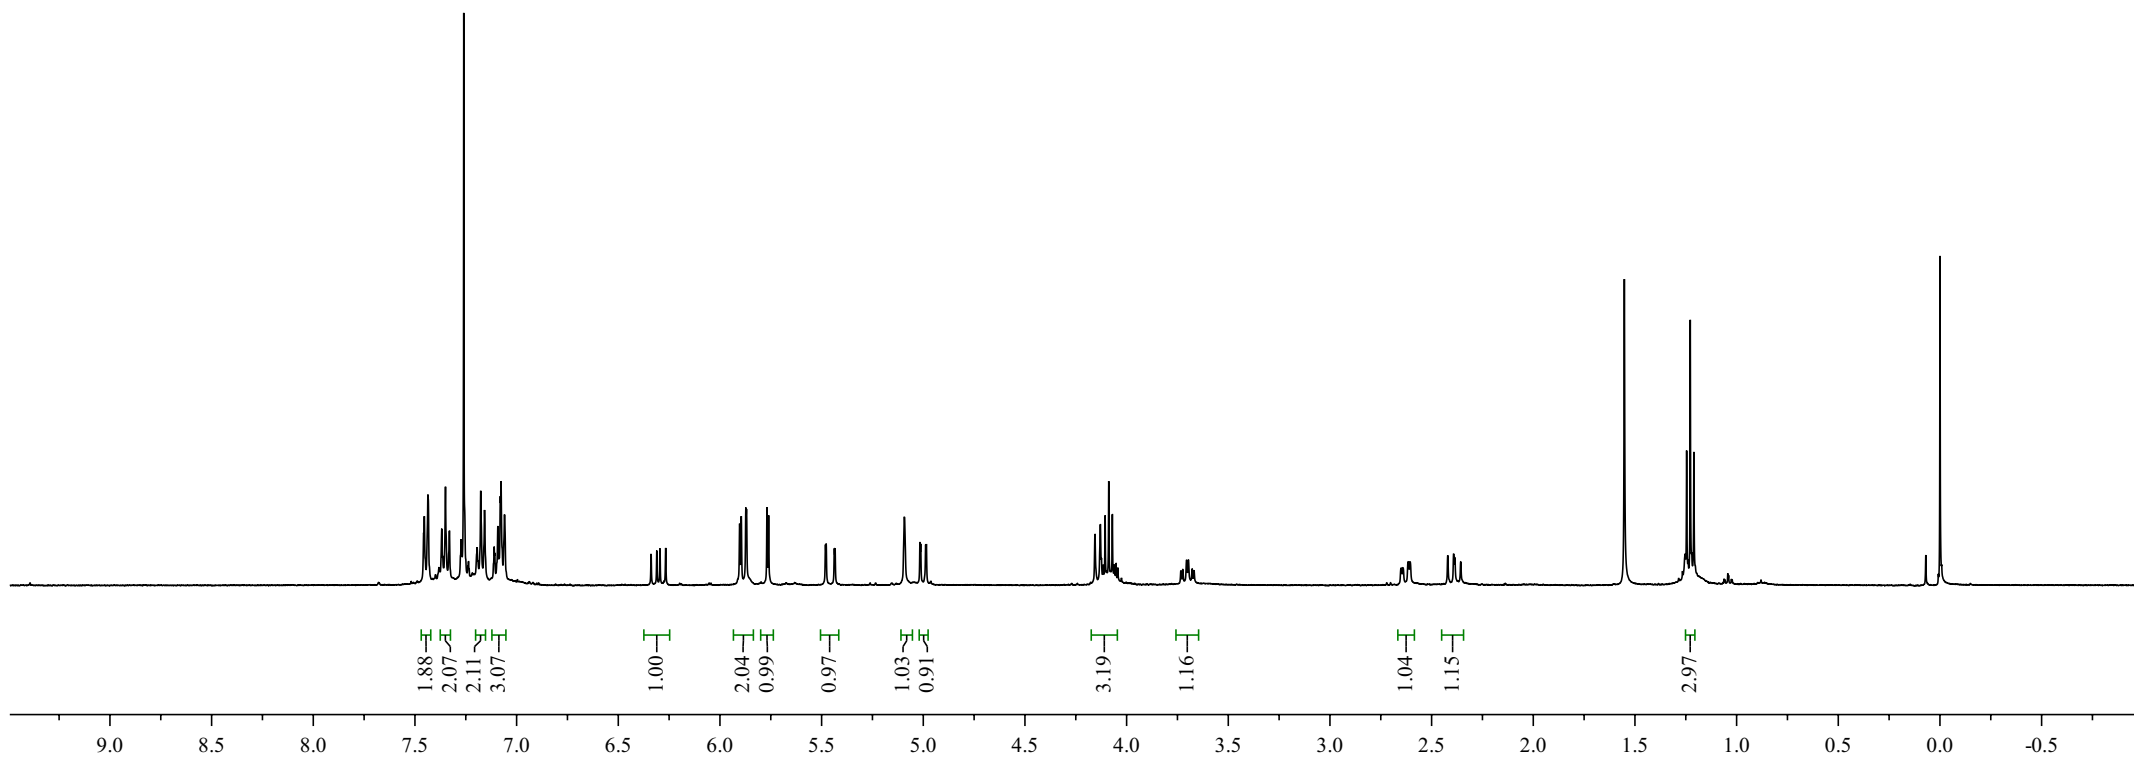

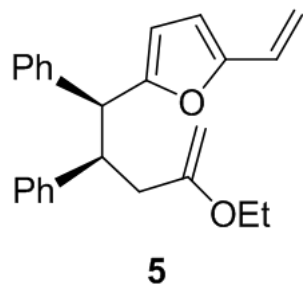

—166.876  
—155.626  
—151.587  
—141.975  
—140.686  
—138.303  
—128.588  
—128.500  
—128.281  
—127.880  
—126.845  
—126.226  
—116.704  
—108.550  
—108.032

—60.411  
—52.418  
—48.953  
—36.892  
—14.120  
—0.985

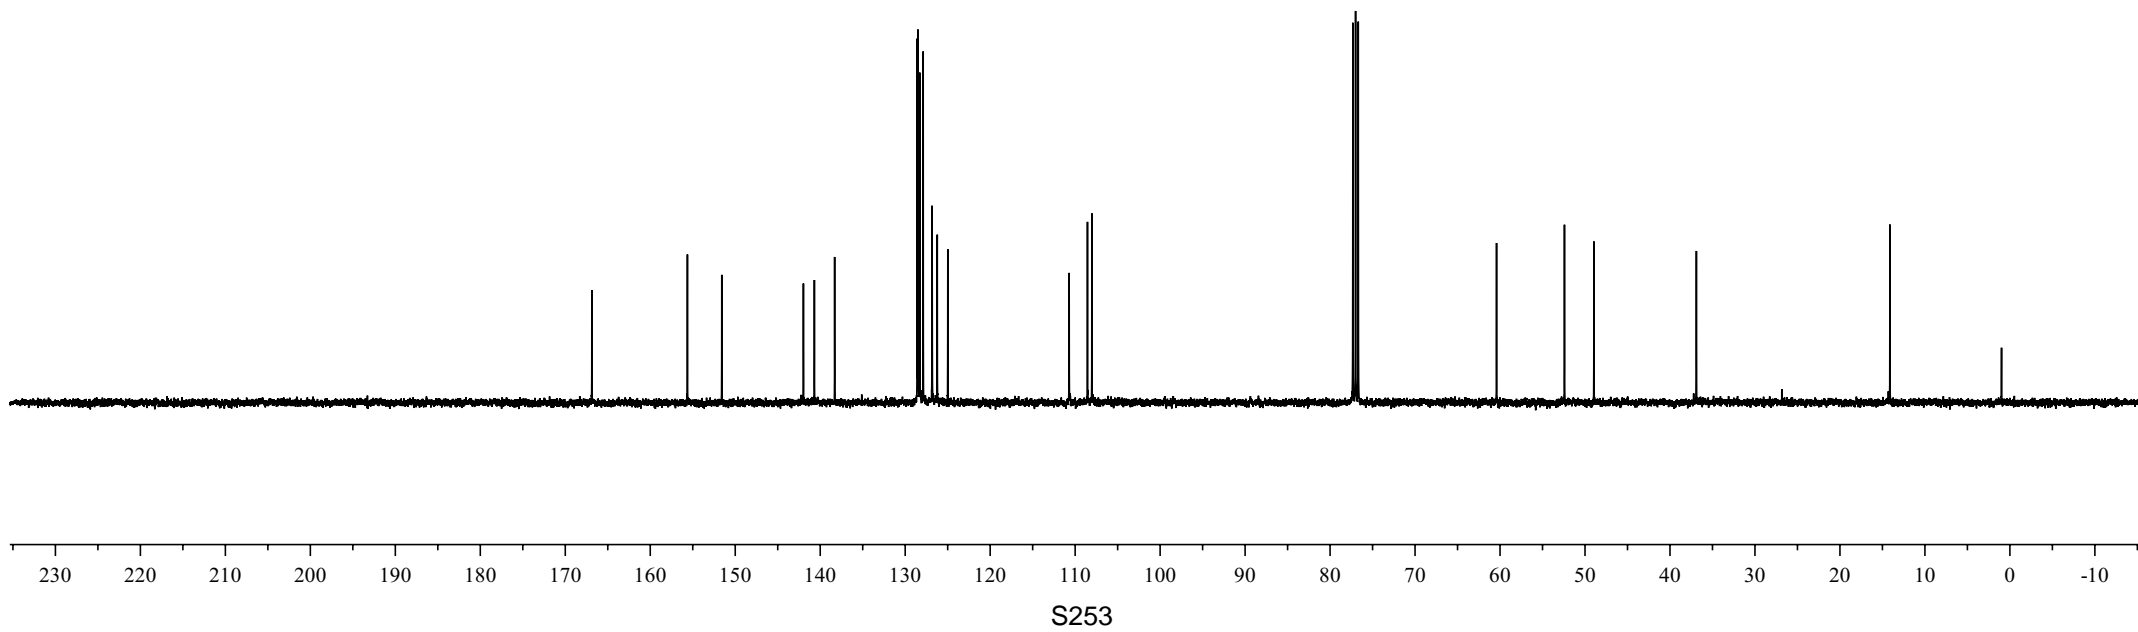

9.543  
 7.205  
 7.186  
 7.181  
 7.177  
 7.165  
 7.140  
 7.136  
 7.120  
 7.083  
 7.075  
 6.964  
 6.749  
 6.735  
 6.538  
 6.069  
 6.060

4.334  
 4.327  
 4.318  
 4.309  
 4.300  
 4.291  
 4.282  
 4.273  
 4.186  
 4.172  
 4.156

2.277  
 2.208

1.354  
 1.337  
 1.319

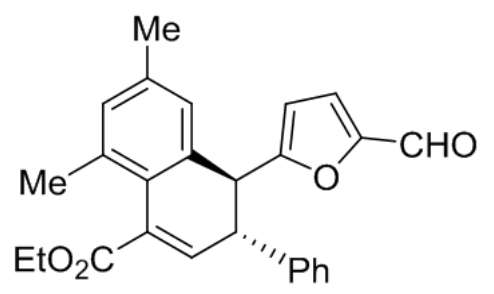

6

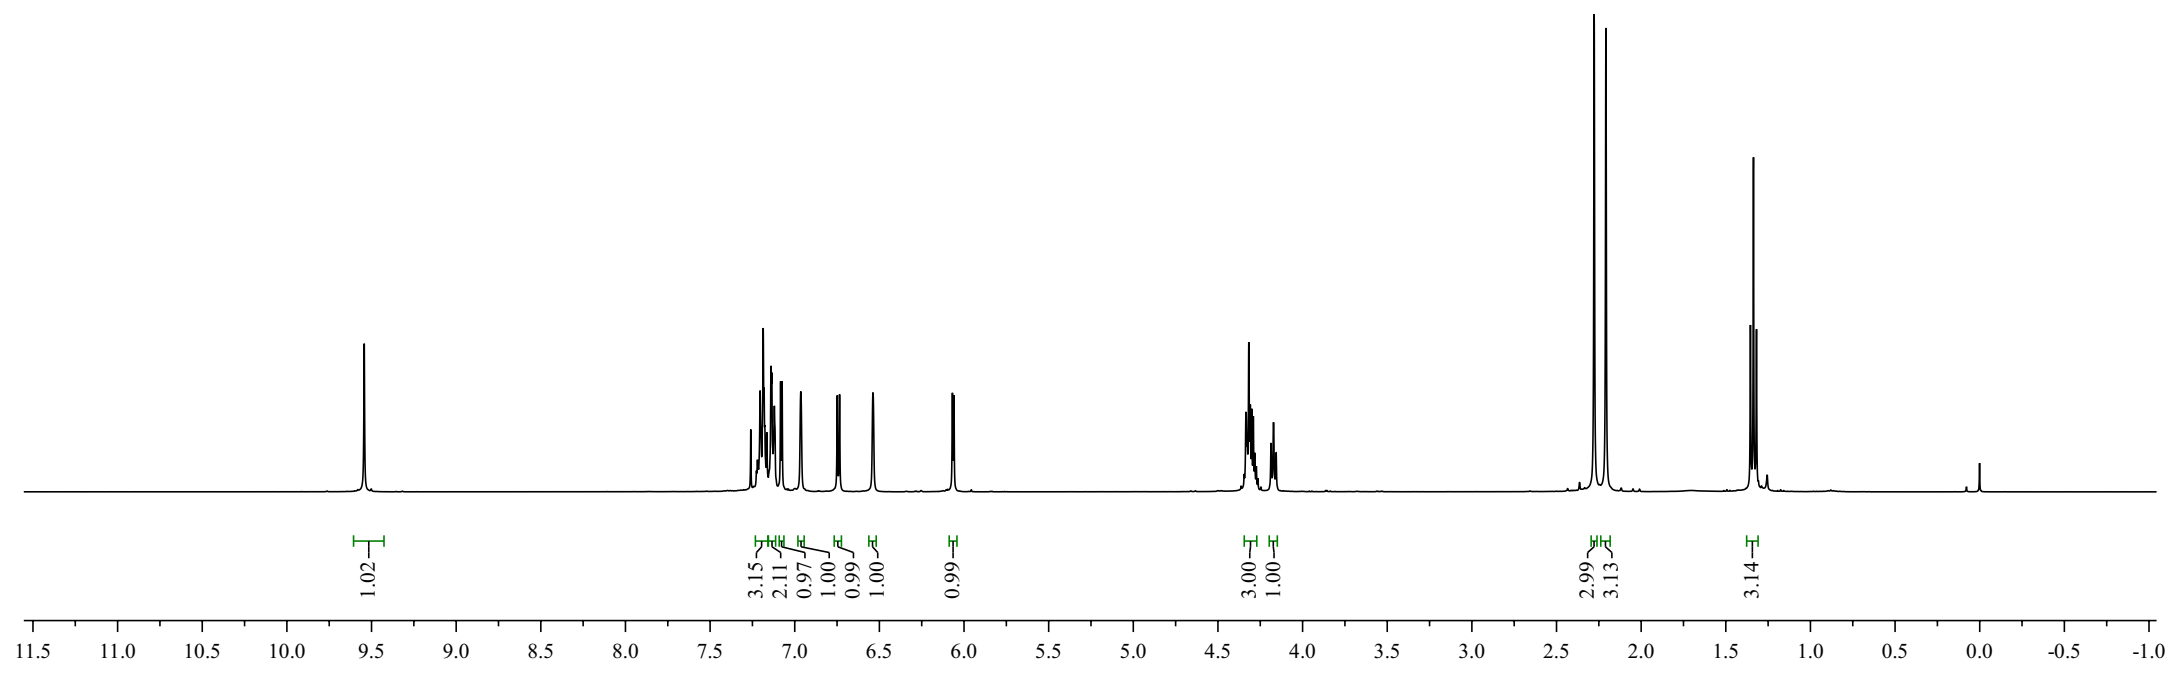

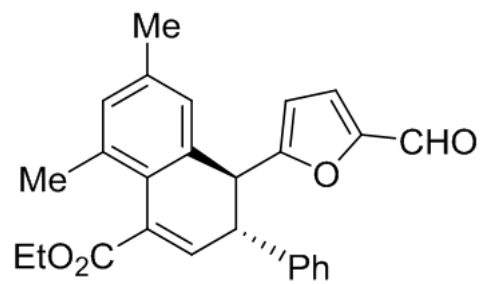

6

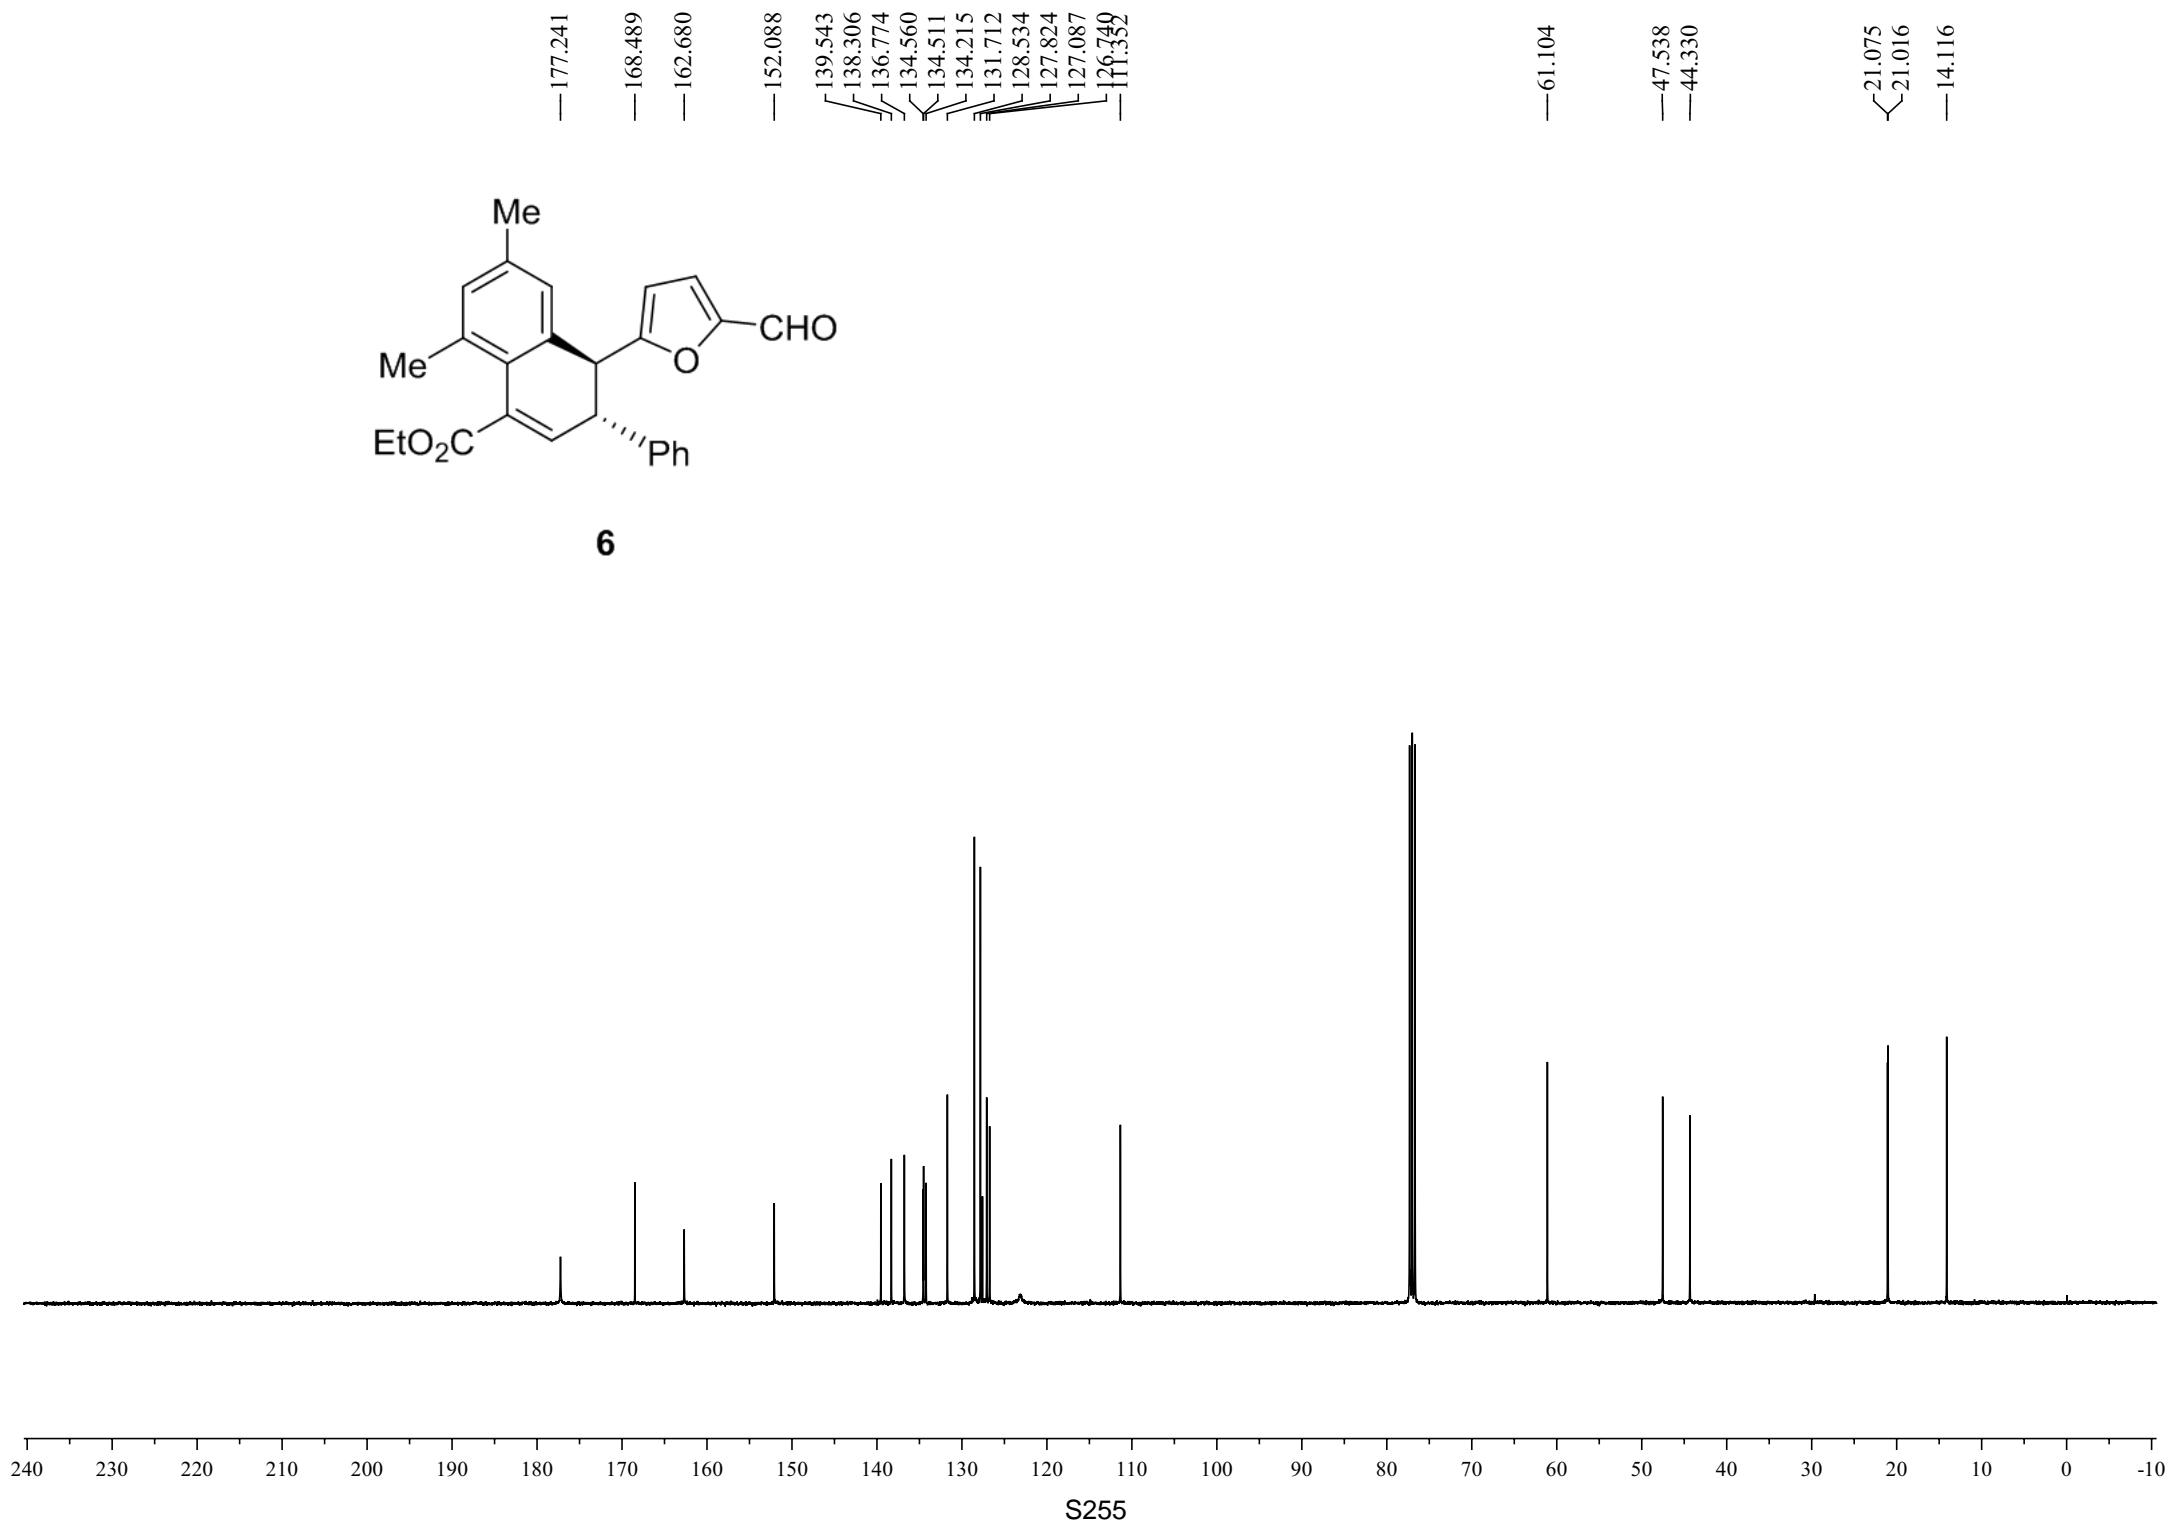

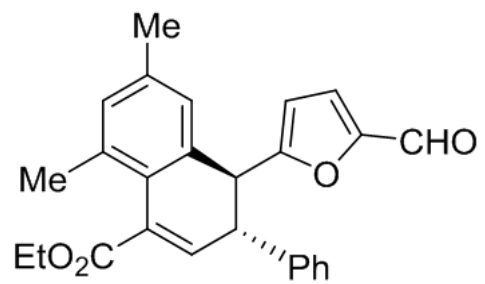

**6**

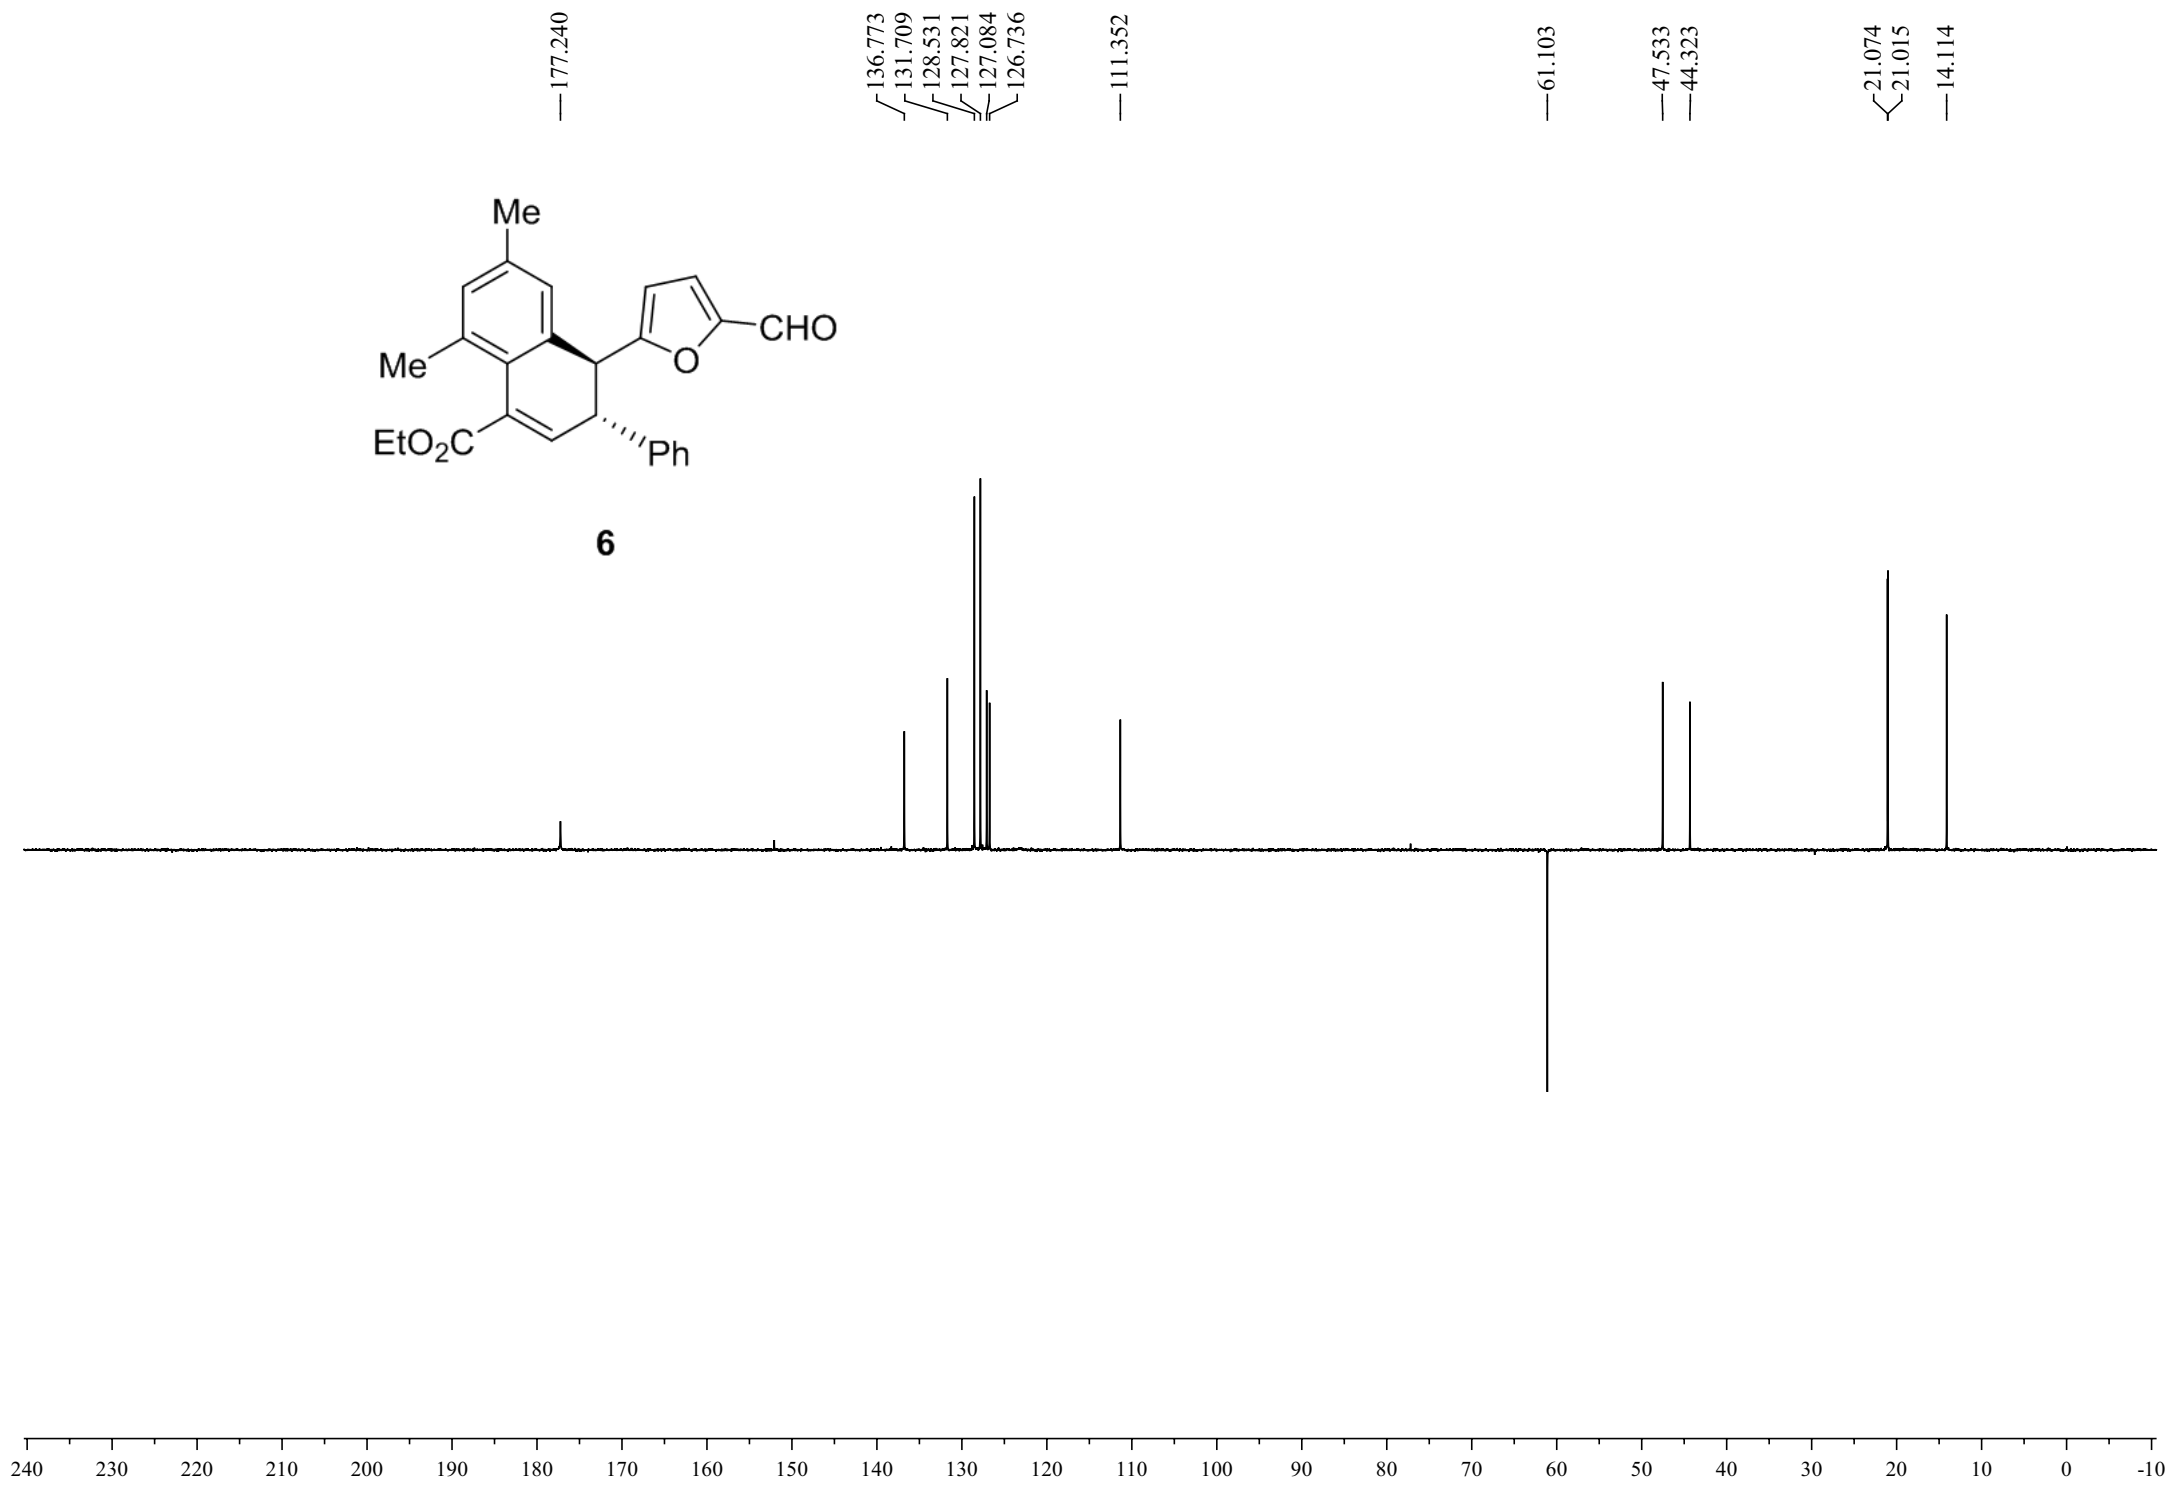



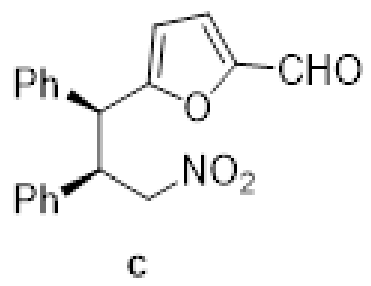

—9.62

7.20  
7.19  
7.17  
7.16  
7.14  
7.12  
7.03  
7.01  
6.45  
6.44  
4.81  
4.78  
4.77  
4.75  
4.65  
4.64  
4.62  
4.61  
4.44  
4.42  
4.39  
4.37  
4.36  
4.35  
4.34

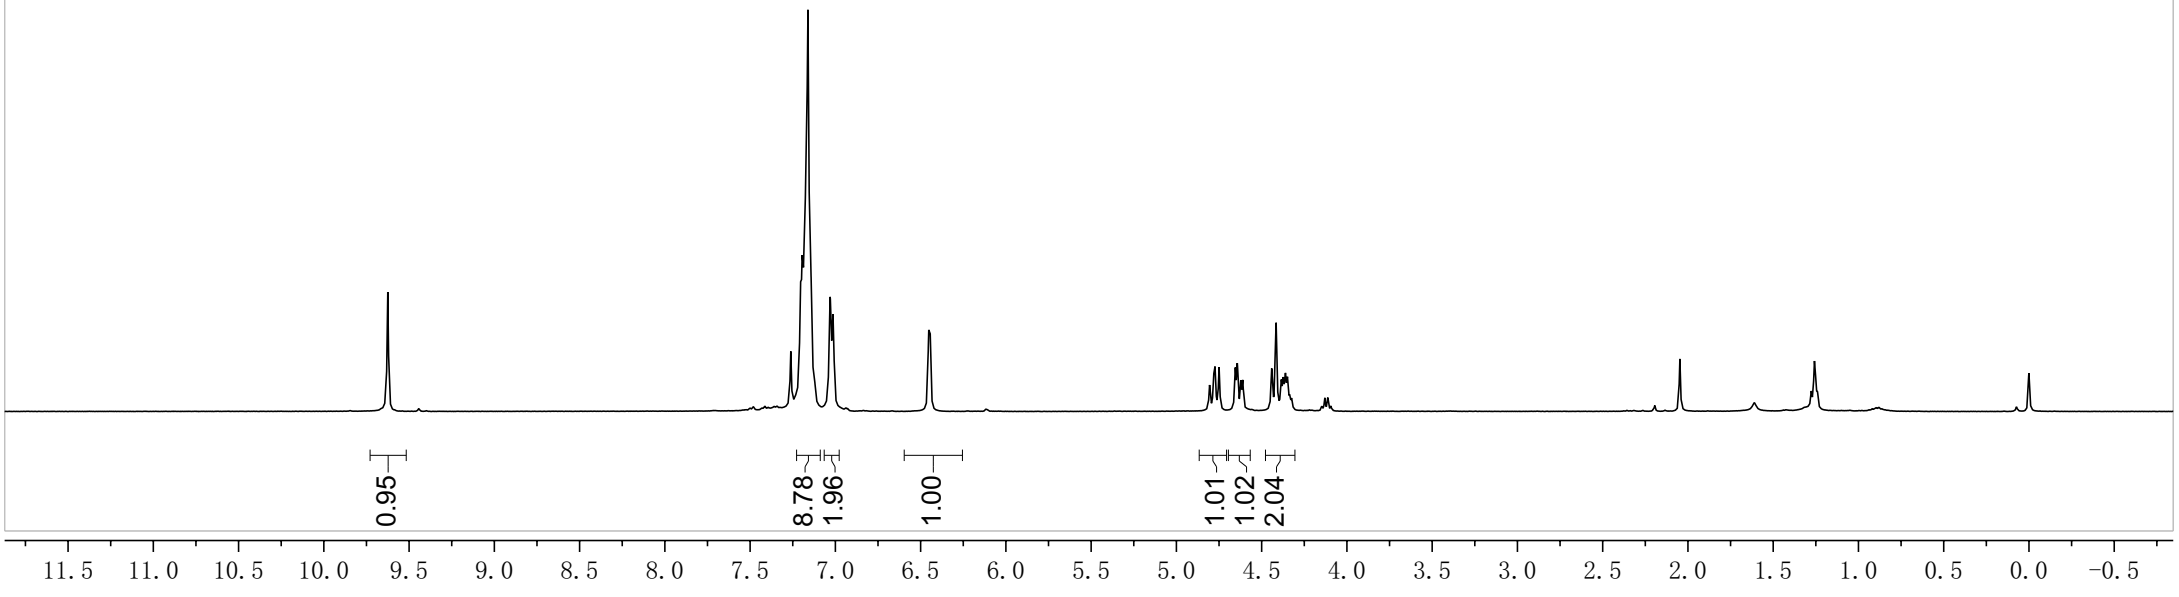

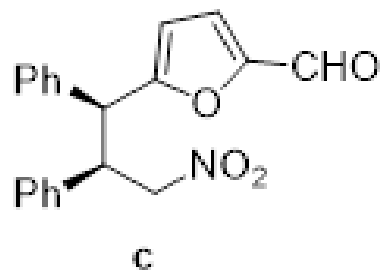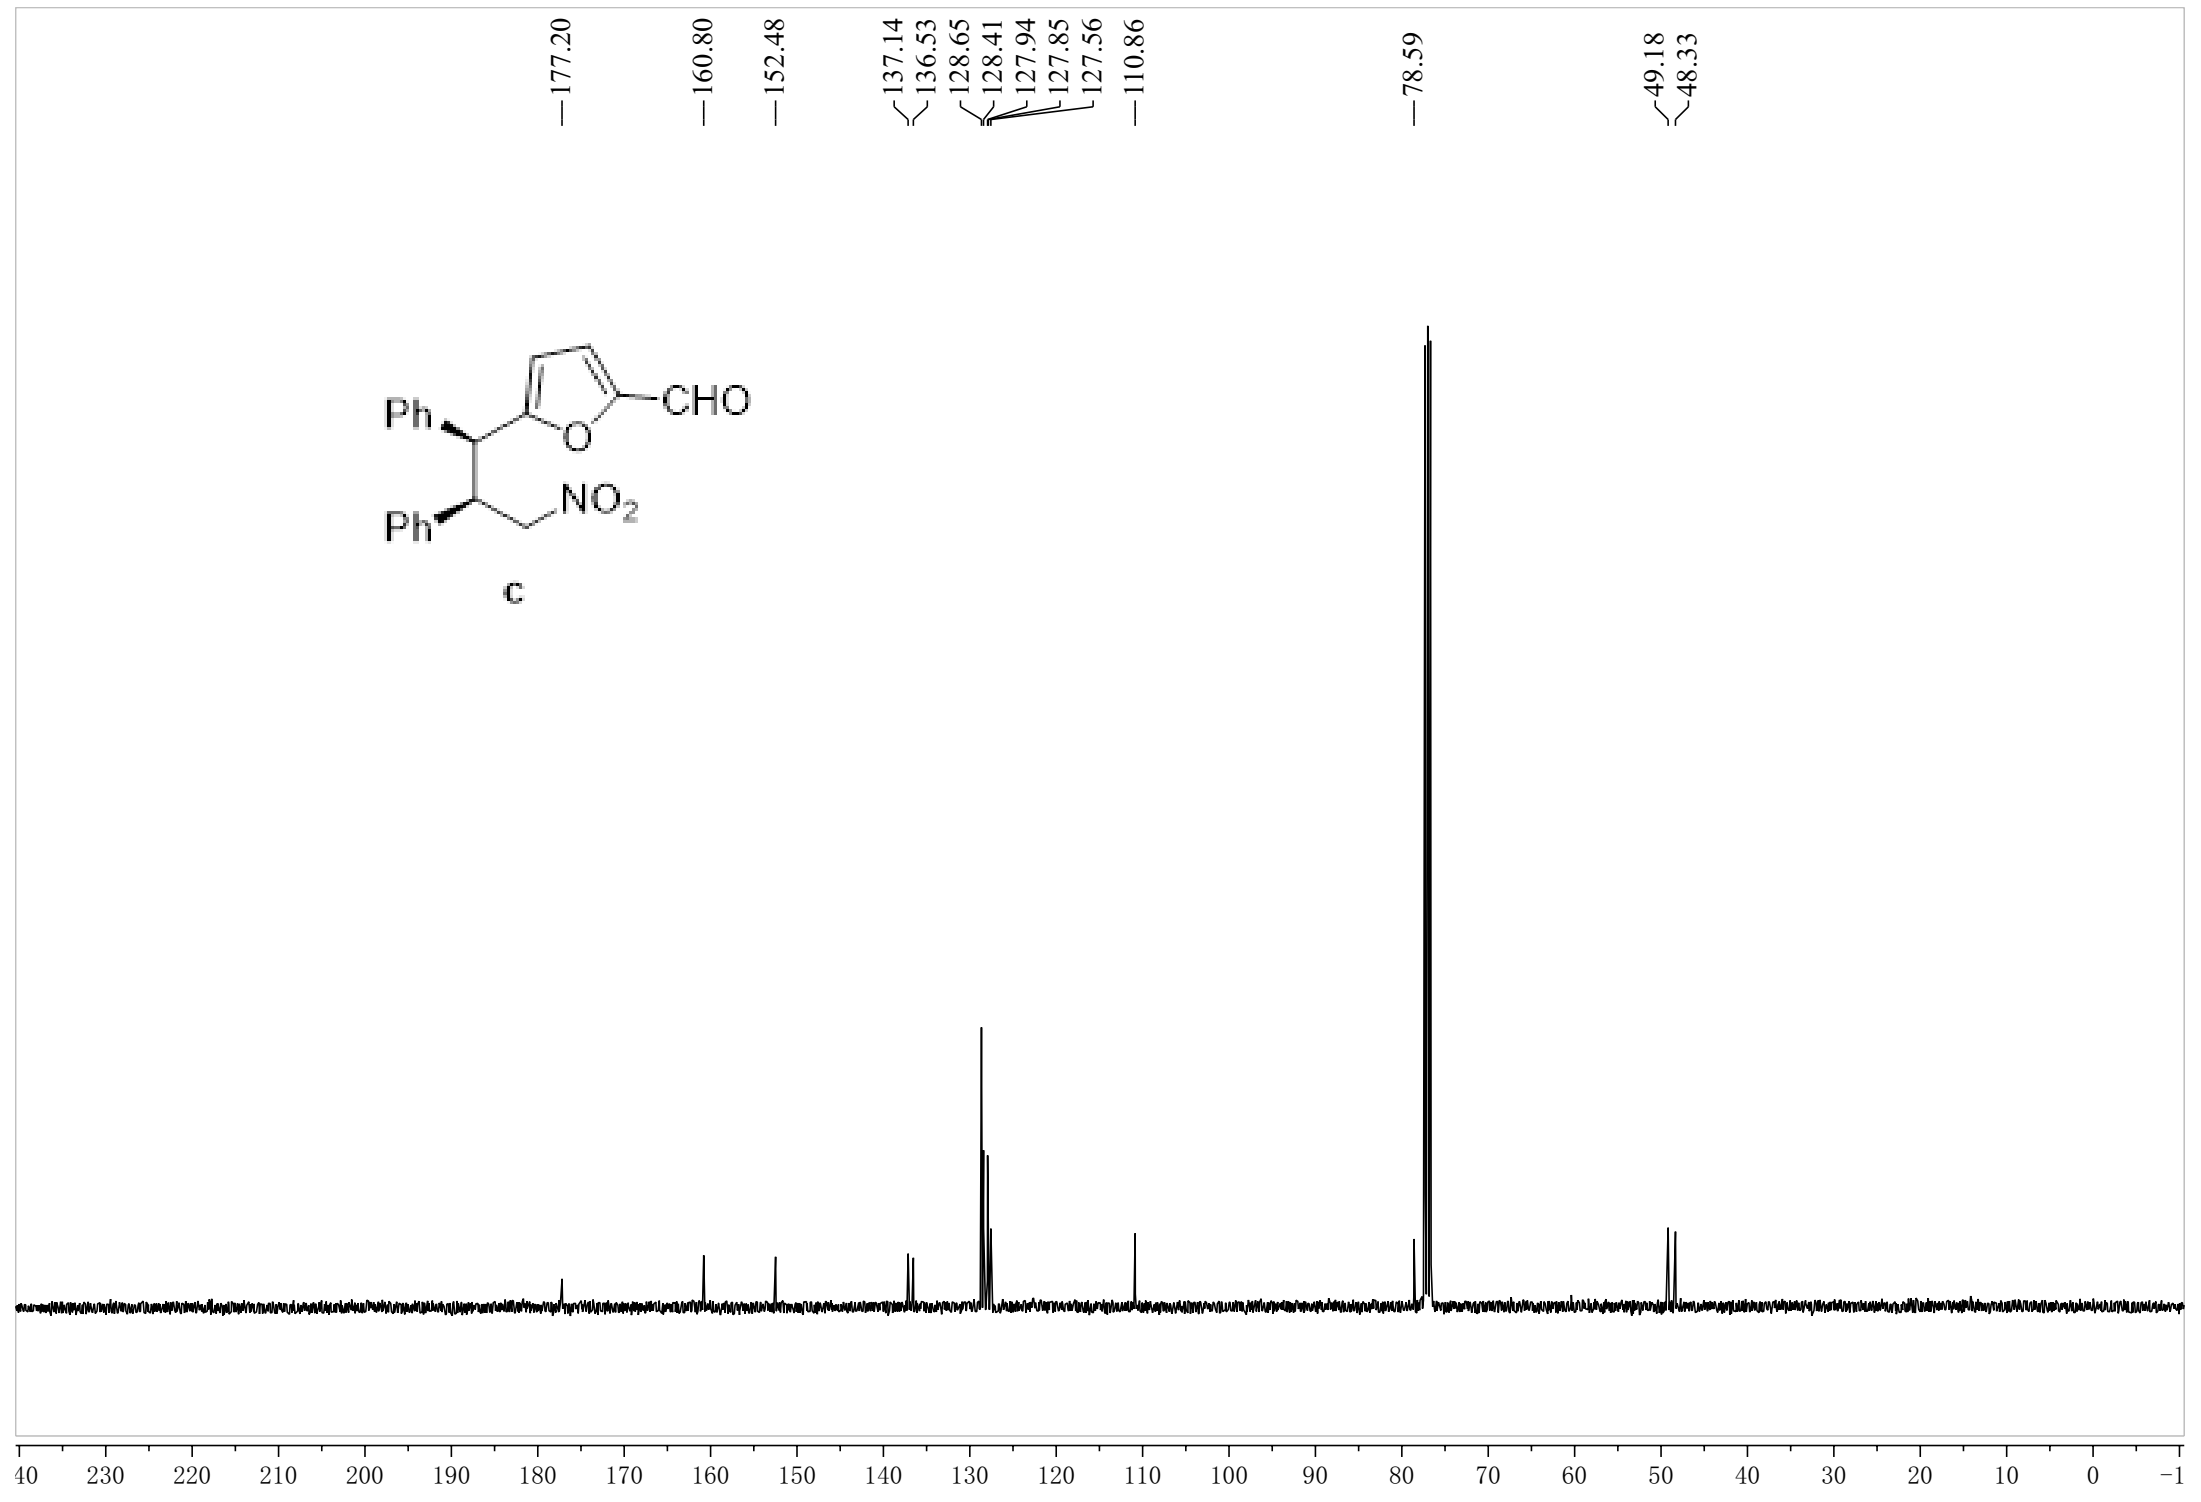

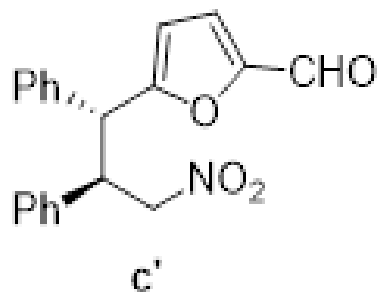

9.44  
7.50  
7.48  
7.43  
7.41  
7.39  
7.36  
7.34  
7.32  
7.27  
7.26  
7.25  
7.23  
7.22  
7.21  
7.20  
7.19  
7.18  
6.94  
6.93  
6.12  
6.11

4.61  
4.58  
4.58  
4.57  
4.55  
4.41  
4.40  
4.39  
4.37  
4.35  
4.34

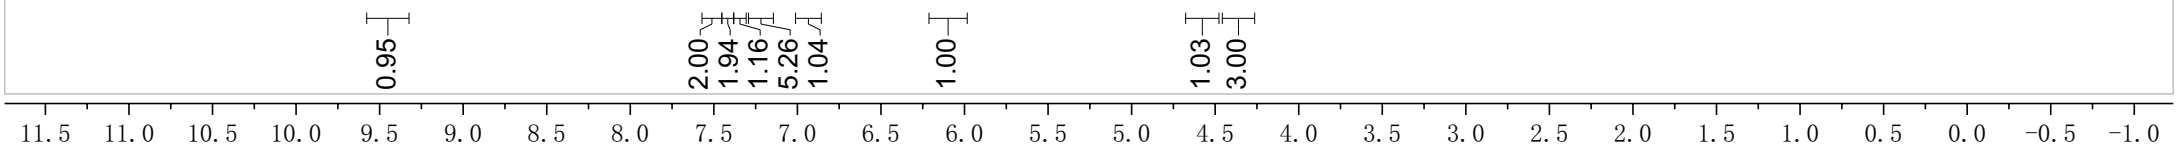

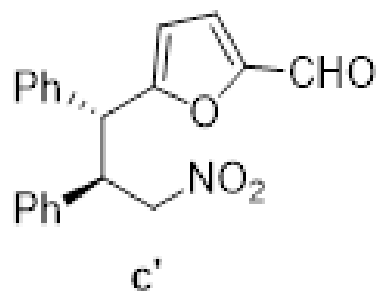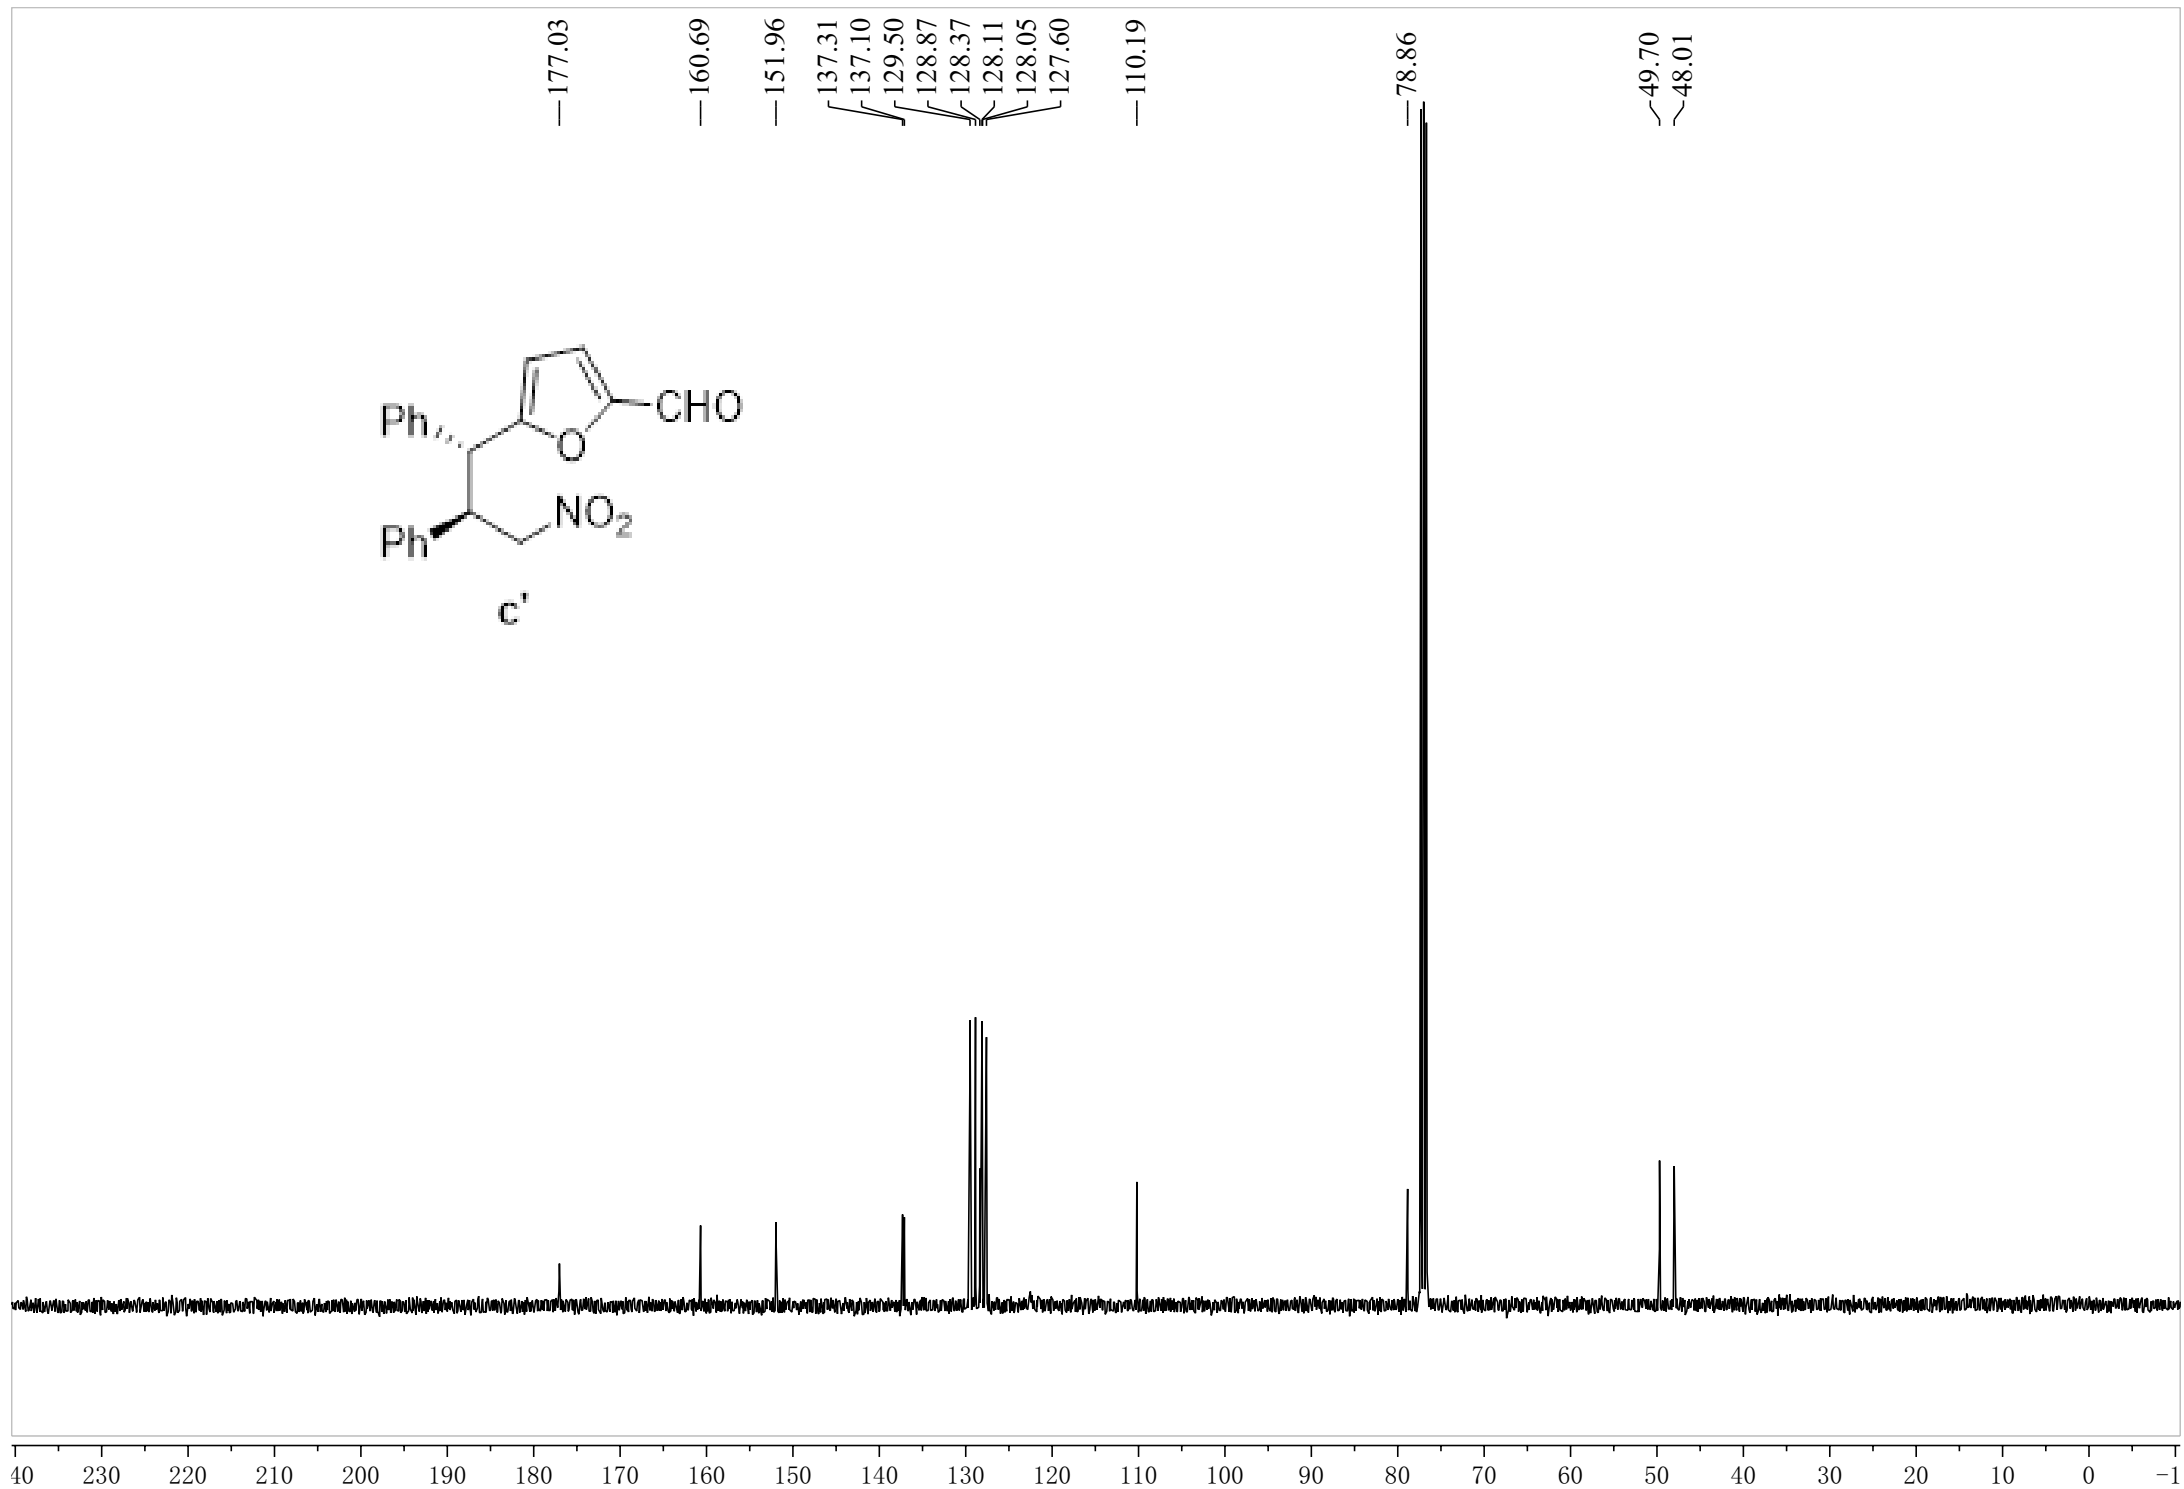

# 10. HPLC or UPC2 spectra copies of compounds

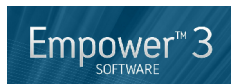

## Sample Information

Sample Name: 3a-rac

Wave Length: 283.0nm

Column: Chiralpak IG-3 95:5

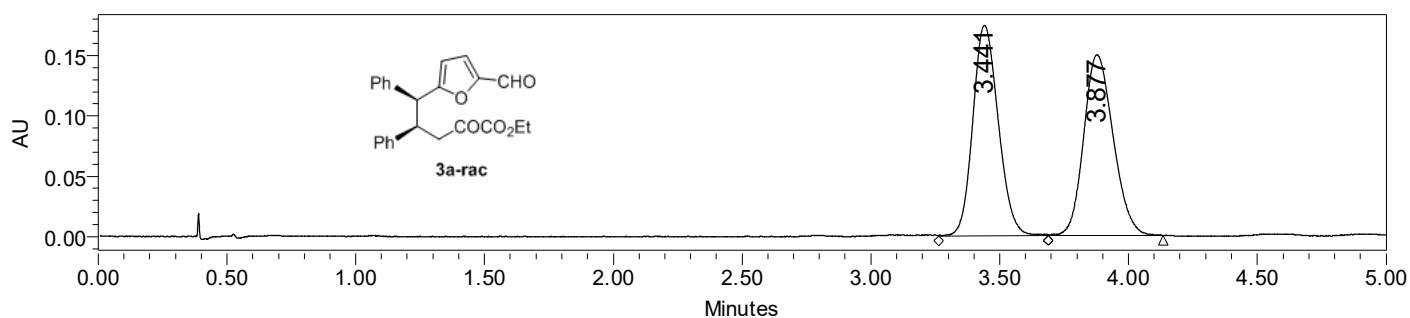

### peak information:

|   | RetTime (min) | Area ( $\mu\text{V}\cdot\text{s}$ ) | Area (%) | Height ( $\mu\text{V}$ ) |
|---|---------------|-------------------------------------|----------|--------------------------|
| 1 | 3.441         | 1205909                             | 50.15    | 174374                   |
| 2 | 3.877         | 1198703                             | 49.85    | 149876                   |

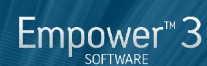

## Sample Information

Sample Name: 3a-ch

Wave Length: 283.0nm

Column: Chiralpak IG-3 95:5

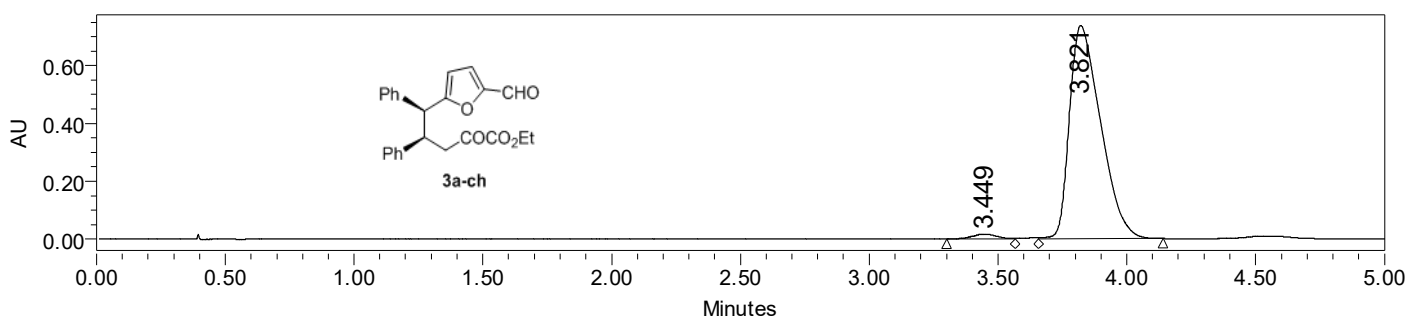

### peak information:

|   | RetTime (min) | Area ( $\mu\text{V}\cdot\text{s}$ ) | Area (%) | Height ( $\mu\text{V}$ ) |
|---|---------------|-------------------------------------|----------|--------------------------|
| 1 | 3.449         | 113649                              | 1.80     | 16735                    |
| 2 | 3.821         | 6209201                             | 98.20    | 737964                   |

Sample Name: 3a'-rac  
Column: Chiralpak IG-3 95:5

Wave Length: 283.0nm

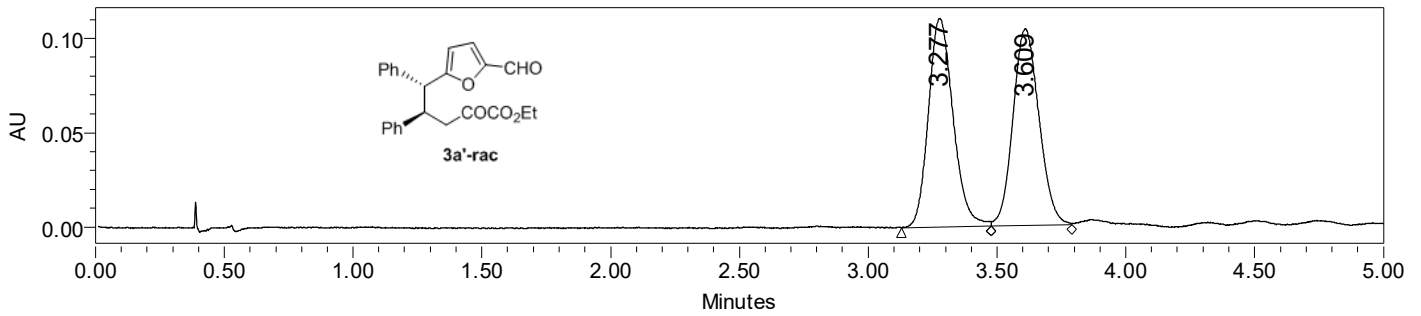**peak information:**

|   | RetTime (min) | Area (μV*s) | Area (%) | Height (μV) |
|---|---------------|-------------|----------|-------------|
| 1 | 3.277         | 736874      | 50.19    | 110503      |
| 2 | 3.609         | 731366      | 49.81    | 104172      |

Sample Name: 3a'-ch  
Column: Chiralpak IG-3 95:5

Wave Length: 283.0nm

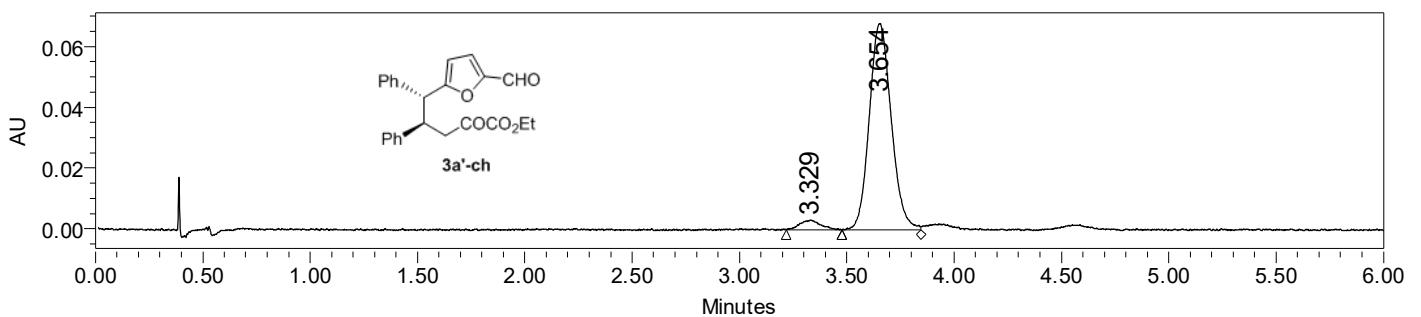**peak information:**

|   | RetTime (min) | Area (μV*s) | Area (%) | Height (μV) |
|---|---------------|-------------|----------|-------------|
| 1 | 3.329         | 22048       | 4.35     | 3252        |
| 2 | 3.654         | 484936      | 95.65    | 67903       |

Sample Name: 3b-rac Wave Length: 284.0nm  
Column: Chiralpak IG-3 95:5

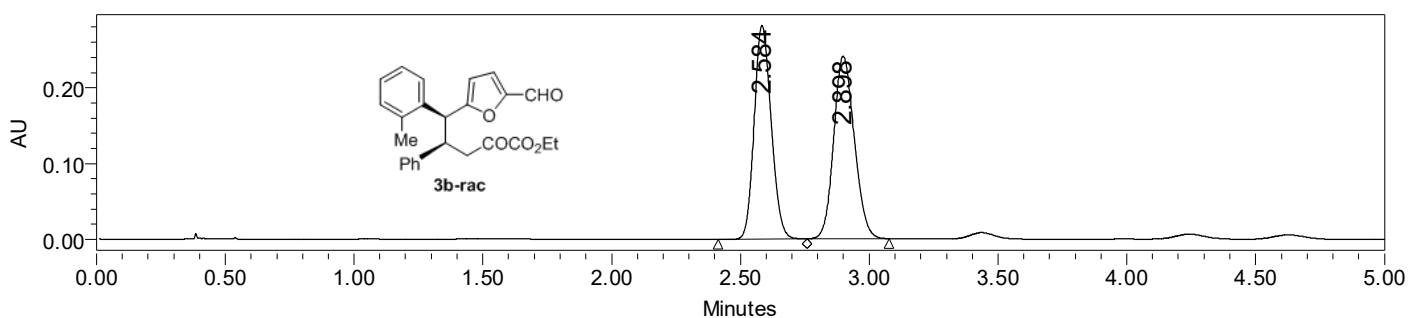**peak information:**

|   | RetTime (min) | Area (μV*s) | Area (%) | Height (μV) |
|---|---------------|-------------|----------|-------------|
| 1 | 2.584         | 1302254     | 49.23    | 282076      |
| 2 | 2.898         | 1342774     | 50.77    | 241103      |

Sample Name: 3b-ch Wave Length: 284.0nm  
Column: Chiralpak IG-3 95:5

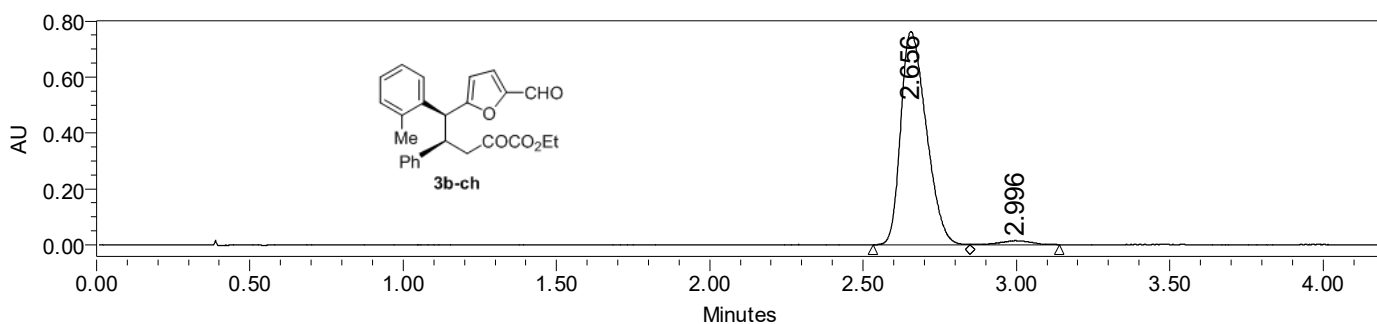**peak information:**

|   | RetTime (min) | Area (μV*s) | Area (%) | Height (μV) |
|---|---------------|-------------|----------|-------------|
| 1 | 2.656         | 4408144     | 97.69    | 762644      |
| 2 | 2.996         | 104062      | 2.31     | 14244       |

Sample Name:

3b'-rac

Wave Length:

284.0nm

Column:

Chiralpak IG-3 95:5

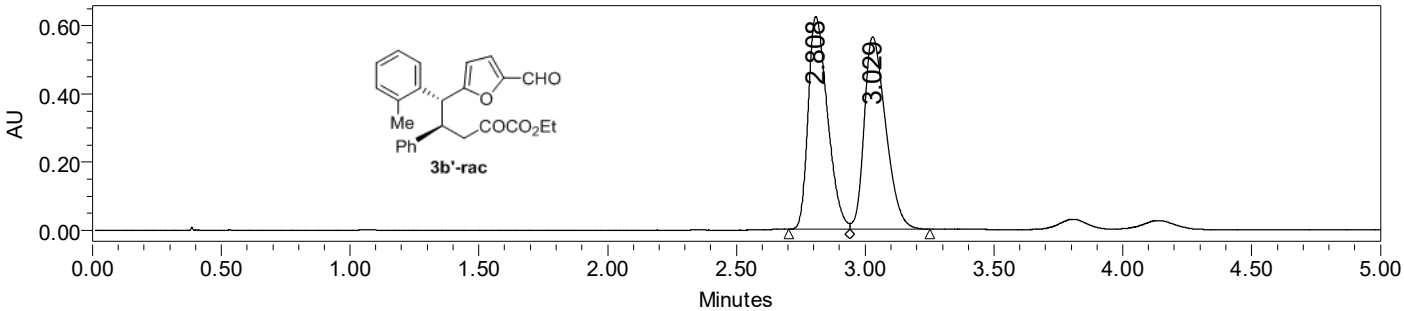

peak information:

|   | RetTime (min) | Area (μV*s) | Area (%) | Height (μV) |
|---|---------------|-------------|----------|-------------|
| 1 | 2.808         | 3260063     | 49.75    | 624174      |
| 2 | 3.029         | 3293377     | 50.25    | 564707      |

Sample Name:

3b'-ch

Wave Length:

284.0nm

Column:

Chiralpak IG-3 95:5

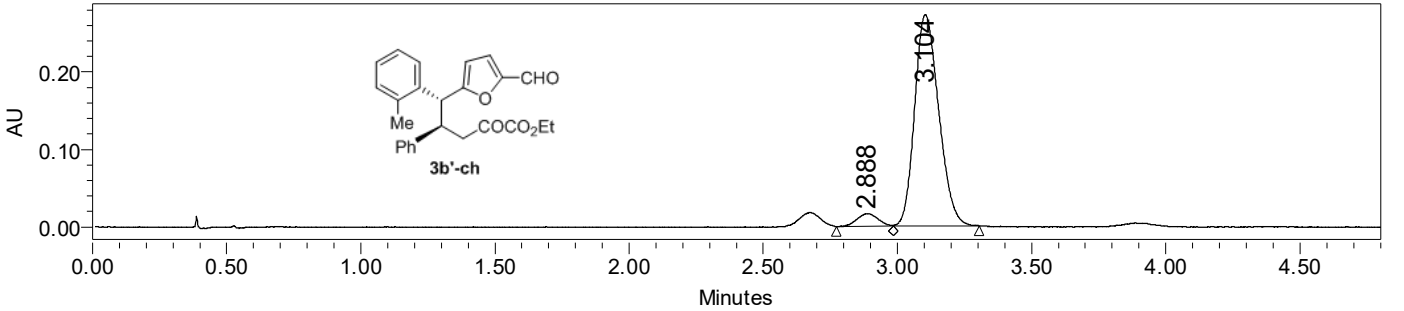

peak information:

|   | RetTime (min) | Area (μV*s) | Area (%) | Height (μV) |
|---|---------------|-------------|----------|-------------|
| 1 | 2.888         | 90253       | 5.05     | 16442       |
| 2 | 3.104         | 1697738     | 94.95    | 272919      |



Sample Name:

3c-rac

Wave Length:

285.0nm

Column:

Trefoil TM CEL1 90:10

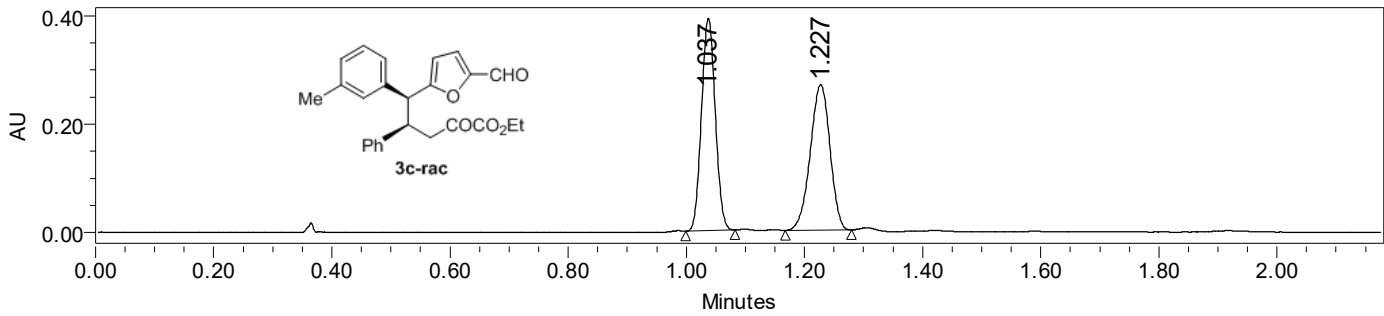**peak information:**

|   | RetTime (min) | Area (μV*s) | Area (%) | Height (μV) |
|---|---------------|-------------|----------|-------------|
| 1 | 1.037         | 633979      | 50.36    | 392251      |
| 2 | 1.227         | 624879      | 49.64    | 269220      |

Sample Name:

3c-ch

Wave Length:

285.0nm

Column:

Trefoil TM CEL1 90:10

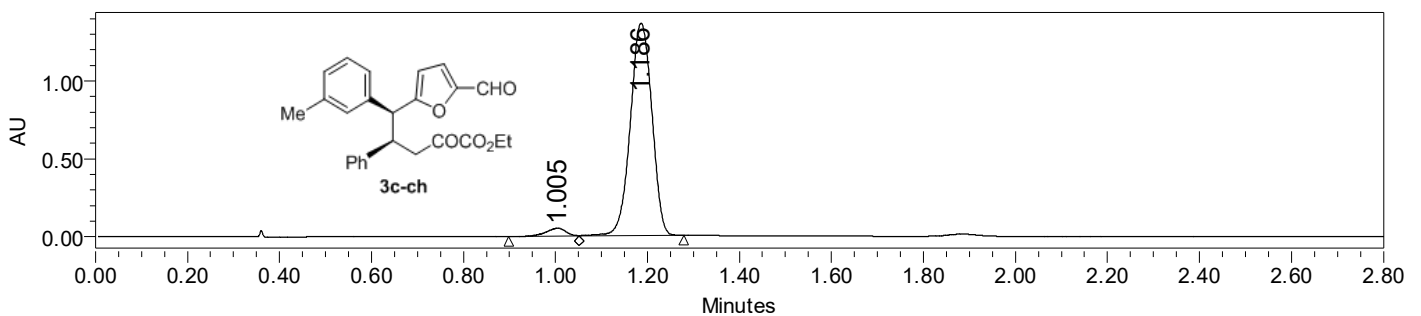**peak information:**

|   | RetTime (min) | Area (μV*s) | Area (%) | Height (μV) |
|---|---------------|-------------|----------|-------------|
| 1 | 1.005         | 157694      | 3.40     | 51085       |
| 2 | 1.186         | 4475333     | 96.60    | 1363951     |

Sample Name: 3c'-rac  
Column: Chiralpak IG-3 95:5

Wave Length: 283.0nm

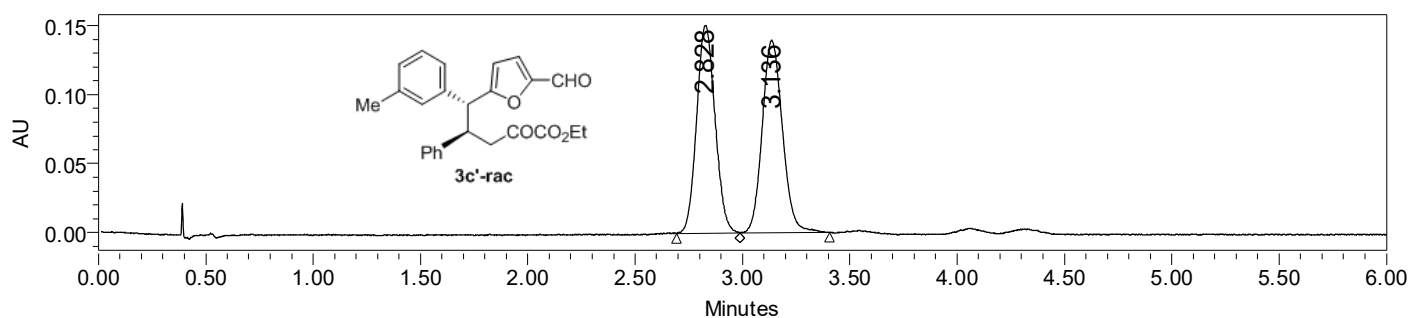**peak information:**

|   | RetTime (min) | Area (μV*s) | Area (%) | Height (μV) |
|---|---------------|-------------|----------|-------------|
| 1 | 2.828         | 900565      | 49.44    | 150700      |
| 2 | 3.136         | 921105      | 50.56    | 139746      |

Sample Name: 3c'-ch  
Column: Chiralpak IG-3 95:5

Wave Length: 283.0nm

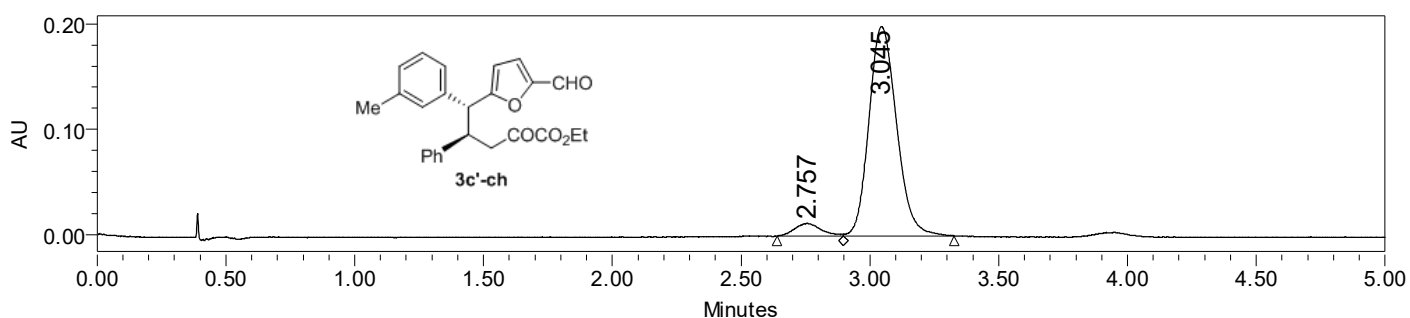**peak information:**

|   | RetTime (min) | Area (μV*s) | Area (%) | Height (μV) |
|---|---------------|-------------|----------|-------------|
| 1 | 2.757         | 85168       | 5.41     | 12012       |
| 2 | 3.045         | 1487815     | 94.59    | 198845      |

Sample Name: 3d-rac  
Column: Chiralpak IG-3 95:5

Wave Length: 284.0nm

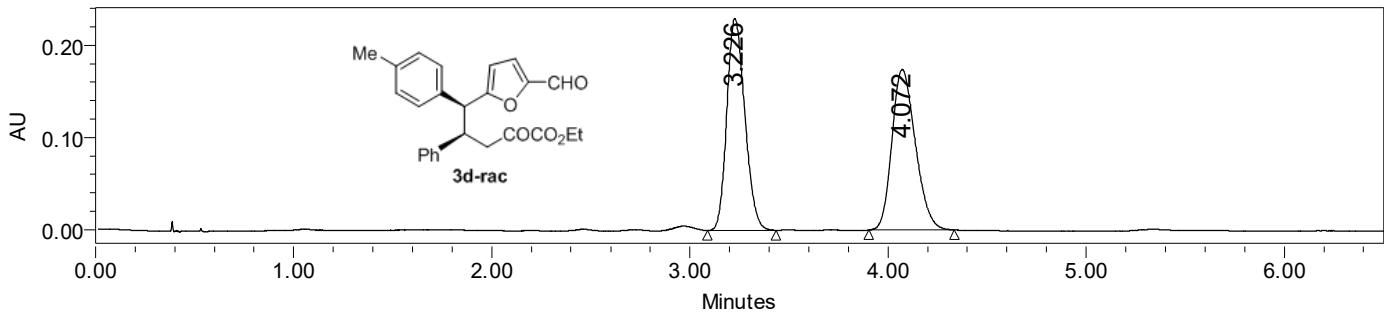**peak information:**

|   | RetTime (min) | Area (μV*s) | Area (%) | Height (μV) |
|---|---------------|-------------|----------|-------------|
| 1 | 3.226         | 1444143     | 50.21    | 229788      |
| 2 | 4.072         | 1431998     | 49.79    | 174153      |

Sample Name: 3d-ch  
Column: Chiralpak IG-3 95:5

Wave Length: 284.0nm

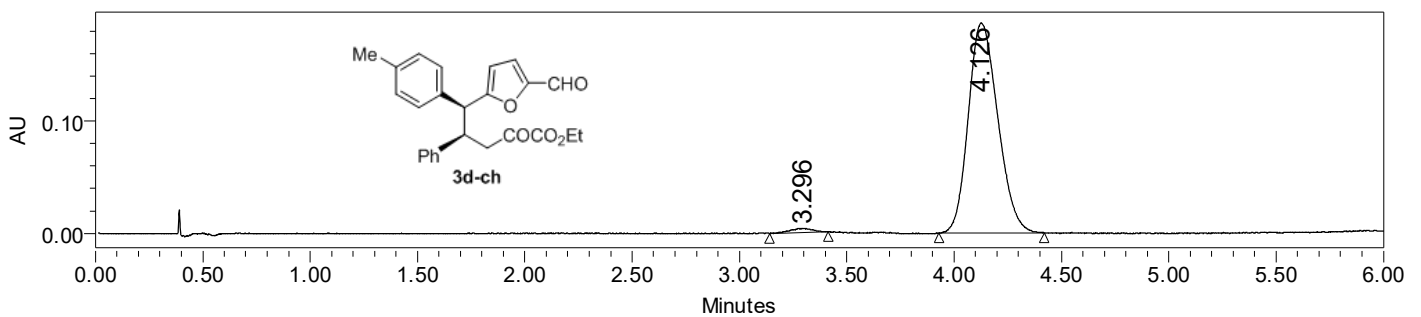**peak information:**

|   | RetTime (min) | Area (μV*s) | Area (%) | Height (μV) |
|---|---------------|-------------|----------|-------------|
| 1 | 3.296         | 26744       | 1.46     | 3620        |
| 2 | 4.126         | 1799278     | 98.54    | 186900      |

Sample Name: 3d'-rac Wave Length: 284.0nm  
Column: Chiralpak AD-3 95:5

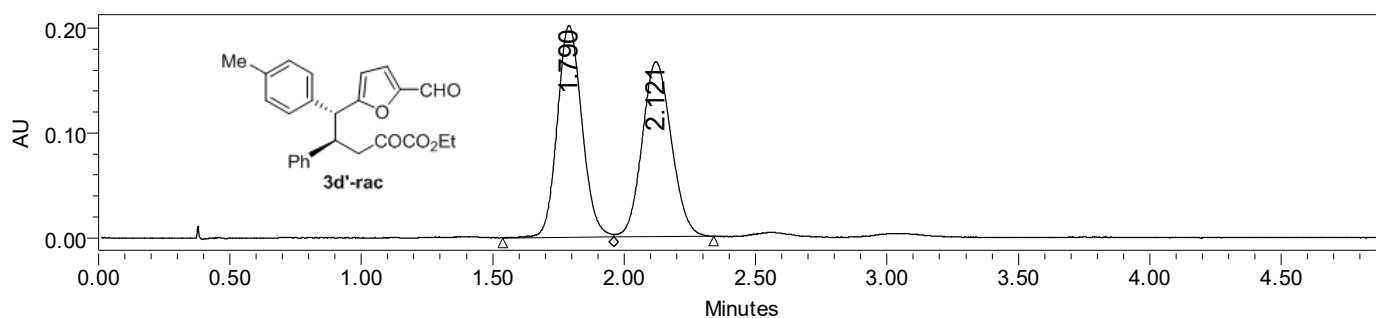**peak information:**

|   | RetTime (min) | Area (μV*s) | Area (%) | Height (μV) |
|---|---------------|-------------|----------|-------------|
| 1 | 1.790         | 1322367     | 50.60    | 202137      |
| 2 | 2.121         | 1290812     | 49.40    | 166755      |

Sample Name: 3d'-ch Wave Length: 284.0nm  
Column: Chiralpak AD-3 95:5

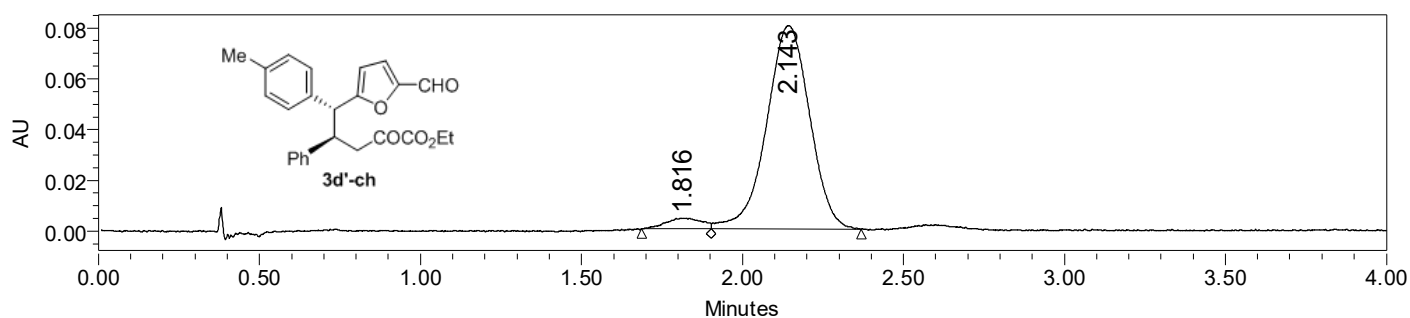**peak information:**

|   | RetTime (min) | Area (μV*s) | Area (%) | Height (μV) |
|---|---------------|-------------|----------|-------------|
| 1 | 1.816         | 33772       | 4.32     | 4244        |
| 2 | 2.143         | 747674      | 95.68    | 80150       |

Sample Name: 3e-rac  
Column: Chiralpak AD-3 95:5

Wave Length: 283.0nm

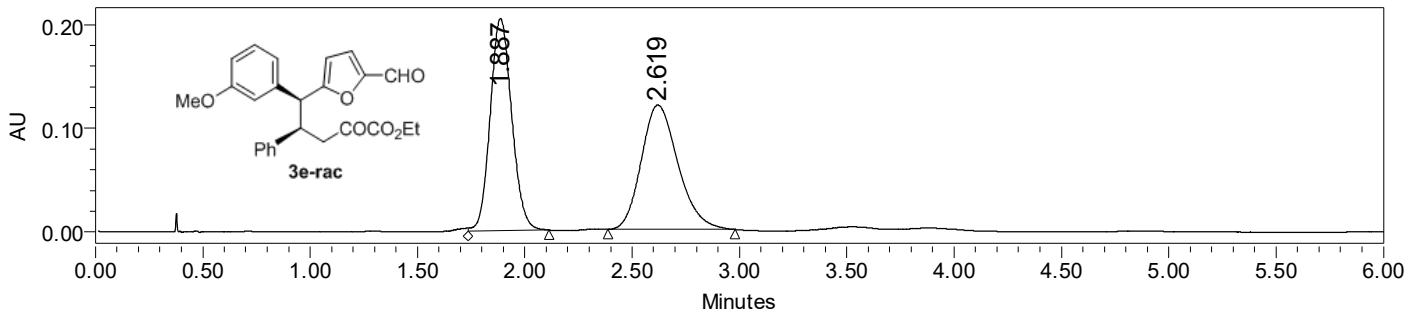**peak information:**

|   | RetTime (min) | Area (μV*s) | Area (%) | Height (μV) |
|---|---------------|-------------|----------|-------------|
| 1 | 1.887         | 1432573     | 50.00    | 204907      |
| 2 | 2.619         | 1432714     | 50.00    | 120103      |

Sample Name: 3e-ch  
Column: Chiralpak AD-3 95:5

Wave Length: 283.0nm

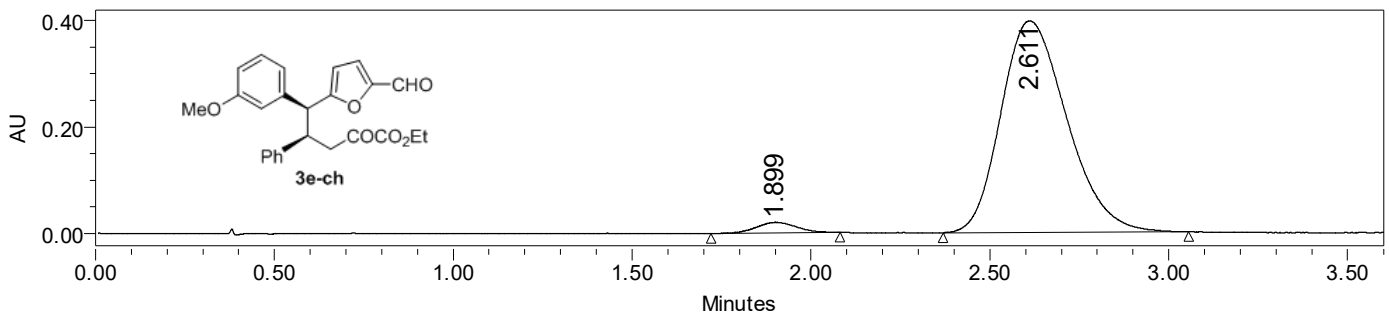**peak information:**

|   | RetTime (min) | Area (μV*s) | Area (%) | Height (μV) |
|---|---------------|-------------|----------|-------------|
| 1 | 1.899         | 154191      | 2.94     | 19728       |
| 2 | 2.611         | 5095032     | 97.06    | 397515      |

Sample Name: 3e'-rac  
Column: Chiralpak AD-3 95:5

Wave Length: 283.0nm

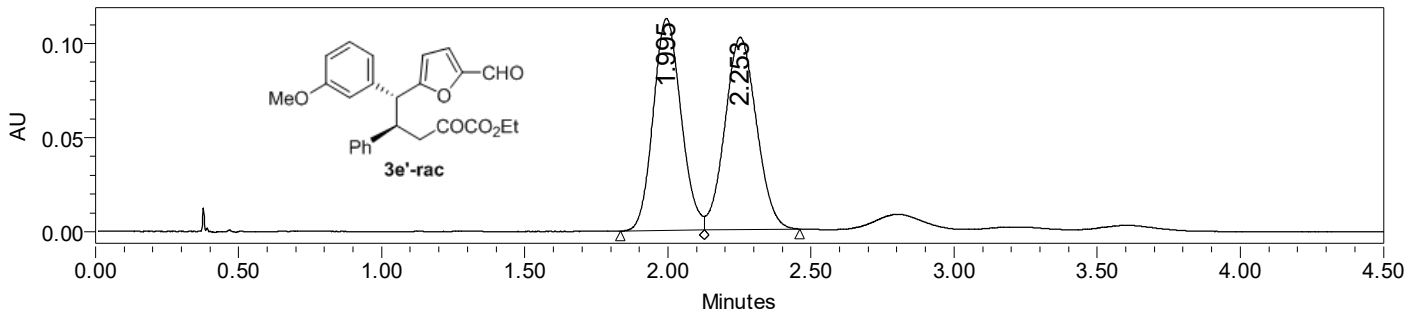**peak information:**

|   | RetTime (min) | Area (μV*s) | Area (%) | Height (μV) |
|---|---------------|-------------|----------|-------------|
| 1 | 1.995         | 763287      | 49.40    | 112693      |
| 2 | 2.253         | 781712      | 50.60    | 102128      |

Sample Name: 3e'-ch  
Column: Chiralpak AD-3 95:5

Wave Length: 283.0nm

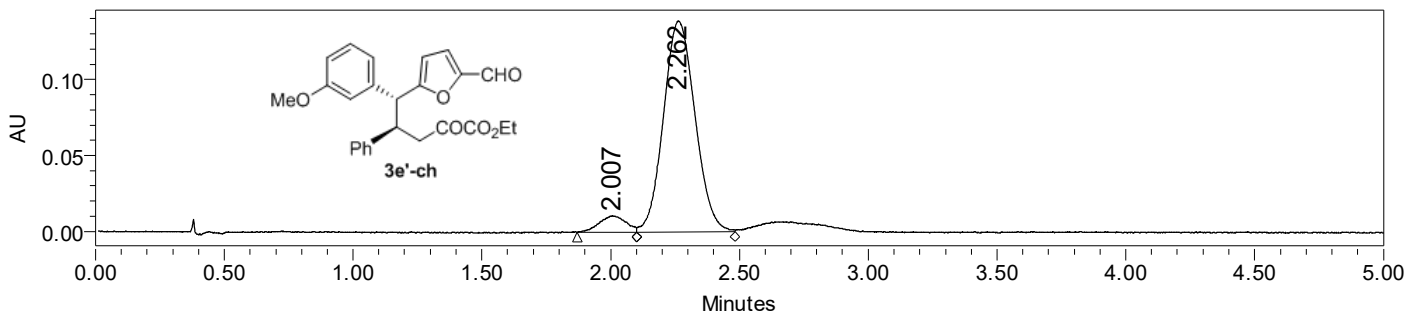**peak information:**

|   | RetTime (min) | Area (μV*s) | Area (%) | Height (μV) |
|---|---------------|-------------|----------|-------------|
| 1 | 2.007         | 78171       | 6.16     | 10898       |
| 2 | 2.262         | 1190904     | 93.84    | 139051      |

Sample Name: 3f-rac  
Column: Chiralpak IG-3 95:5

Wave Length: 285.0nm

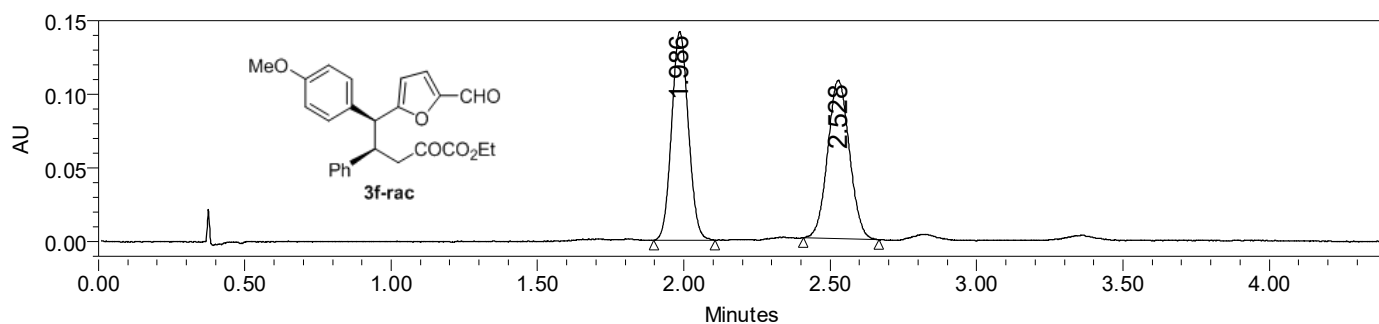**peak information:**

|   | RetTime (min) | Area (μV*s) | Area (%) | Height (μV) |
|---|---------------|-------------|----------|-------------|
| 1 | 1.986         | 565680      | 50.35    | 141912      |
| 2 | 2.528         | 557765      | 49.65    | 107644      |

Sample Name: 3f-ch  
Column: Chiralpak IG-3 95:5

Wave Length: 285.0nm

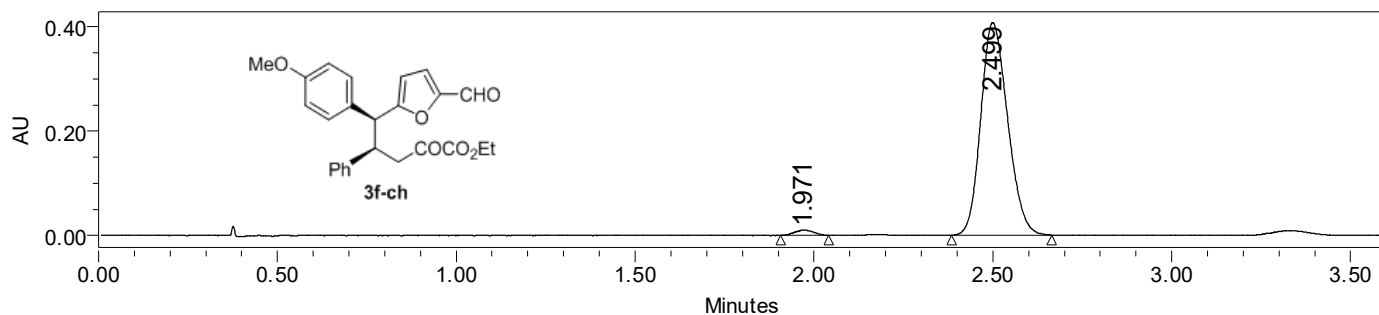**peak information:**

|   | RetTime (min) | Area (μV*s) | Area (%) | Height (μV) |
|---|---------------|-------------|----------|-------------|
| 1 | 1.971         | 36814       | 1.70     | 9950        |
| 2 | 2.499         | 2129477     | 98.30    | 407582      |

Sample Name: 3f'-rac  
Column: Chiralpak AD-3 95:5

Wave Length: 283.0nm

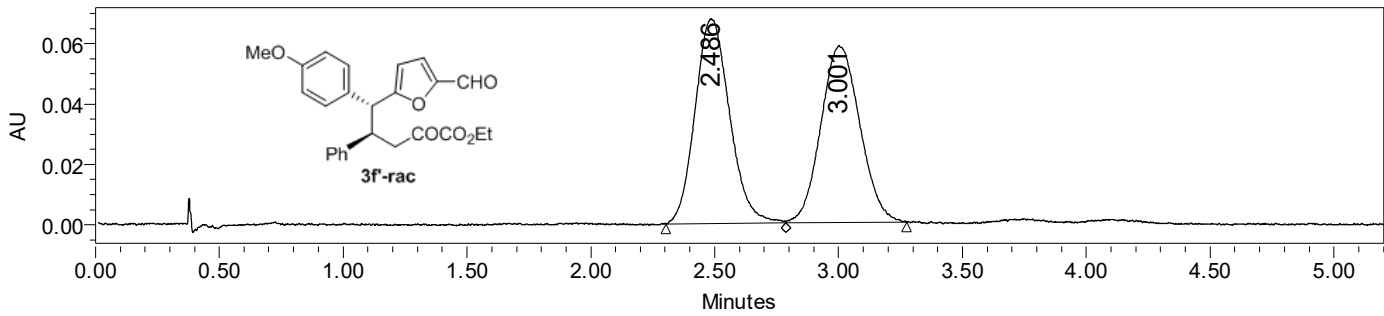**peak information:**

|   | RetTime (min) | Area (μV*s) | Area (%) | Height (μV) |
|---|---------------|-------------|----------|-------------|
| 1 | 2.486         | 656646      | 50.64    | 67981       |
| 2 | 3.001         | 640165      | 49.36    | 58617       |

Sample Name: 3f'-ch  
Column: Chiralpak AD-3 95:5

Wave Length: 283.0nm

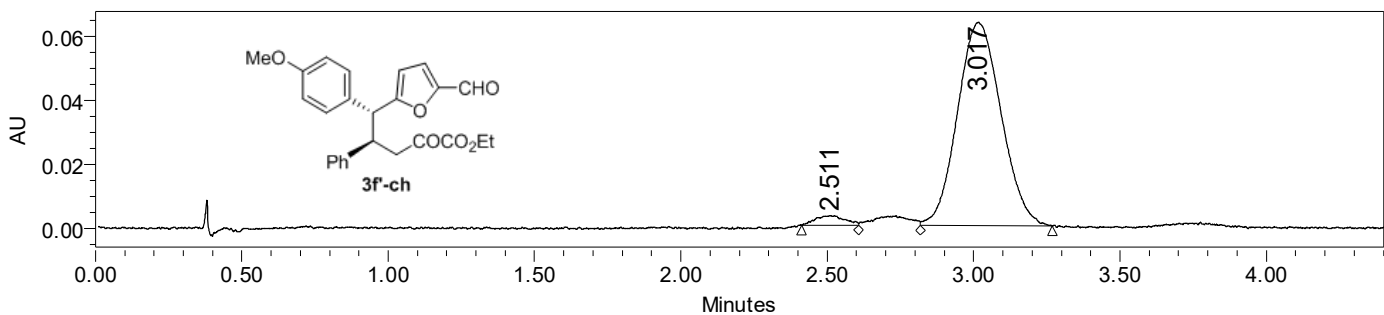**peak information:**

|   | RetTime (min) | Area (μV*s) | Area (%) | Height (μV) |
|---|---------------|-------------|----------|-------------|
| 1 | 2.511         | 20865       | 3.06     | 3062        |
| 2 | 3.017         | 661146      | 96.94    | 63614       |



Sample Name: 3g-rac  
Column: Chiralpak IG-3 95:5

Wave Length: 285.0nm

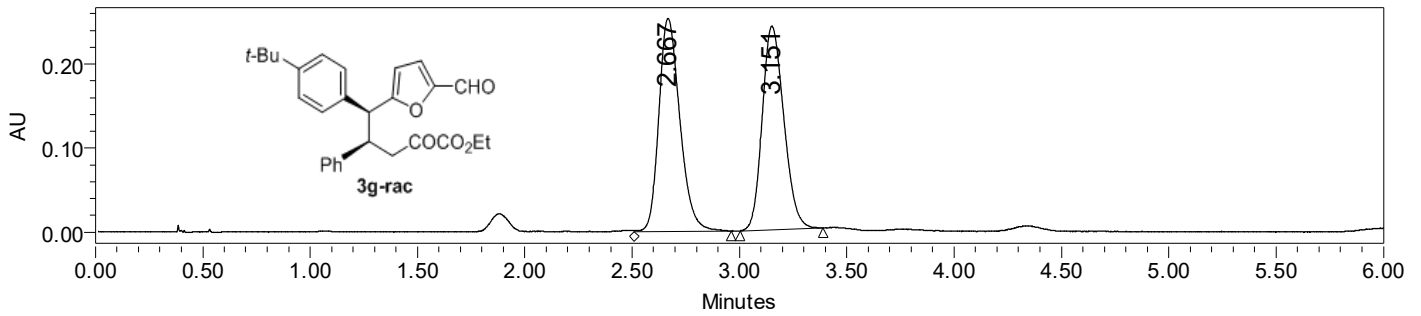**peak information:**

|   | RetTime (min) | Area (μV*s) | Area (%) | Height (μV) |
|---|---------------|-------------|----------|-------------|
| 1 | 2.667         | 1730739     | 50.40    | 253357      |
| 2 | 3.151         | 1703197     | 49.60    | 242197      |

Sample Name: 3g-ch  
Column: Chiralpak IG-3 95:5

Wave Length: 285.0nm

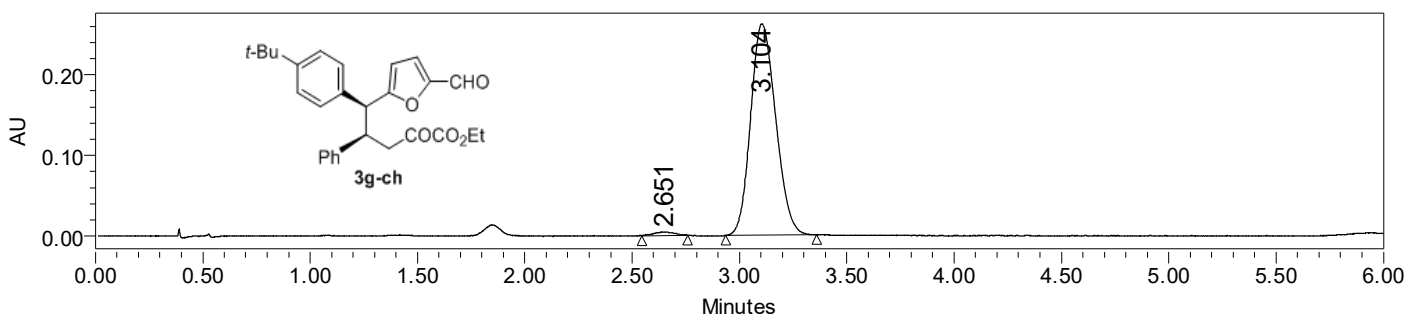**peak information:**

|   | RetTime (min) | Area (μV*s) | Area (%) | Height (μV) |
|---|---------------|-------------|----------|-------------|
| 1 | 2.651         | 30440       | 1.40     | 4553        |
| 2 | 3.104         | 2141579     | 98.60    | 262049      |

Sample Name: 3g'-rac  
Column: Chiralpak IG-3 95:5

Wave Length: 284.0nm

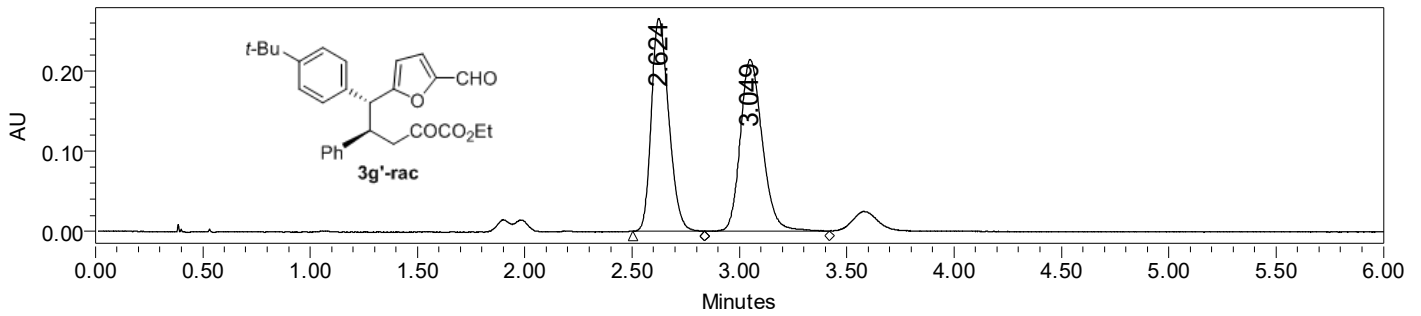**peak information:**

|   | RetTime (min) | Area (μV*s) | Area (%) | Height (μV) |
|---|---------------|-------------|----------|-------------|
| 1 | 2.624         | 1503733     | 49.59    | 265727      |
| 2 | 3.049         | 1528653     | 50.41    | 214594      |

Sample Name: 3g'-ch  
Column: Chiralpak IG-3 95:5

Wave Length: 284.0nm

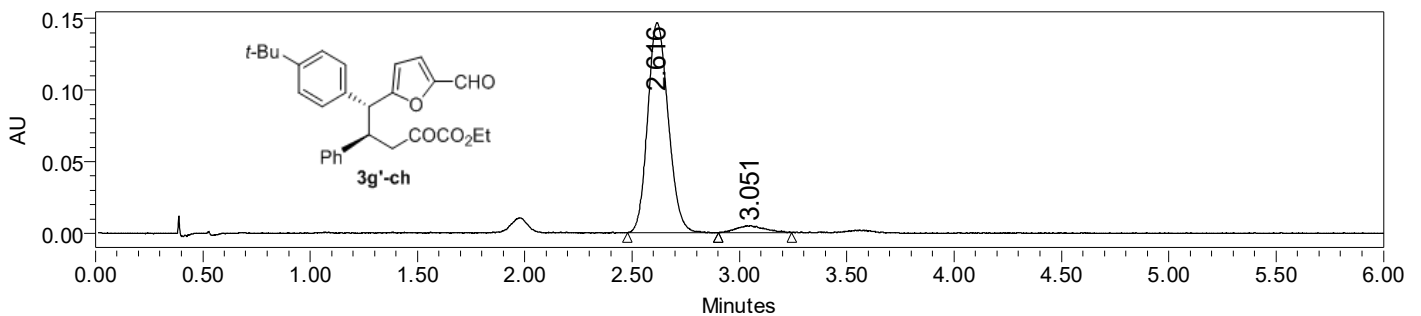**peak information:**

|   | RetTime (min) | Area (μV*s) | Area (%) | Height (μV) |
|---|---------------|-------------|----------|-------------|
| 1 | 2.616         | 980905      | 95.41    | 146636      |
| 2 | 3.051         | 47203       | 4.59     | 4953        |

Sample Name: 3h-rac  
Column: Chiralpak IG-3 95:5

Wave Length: 283.0nm

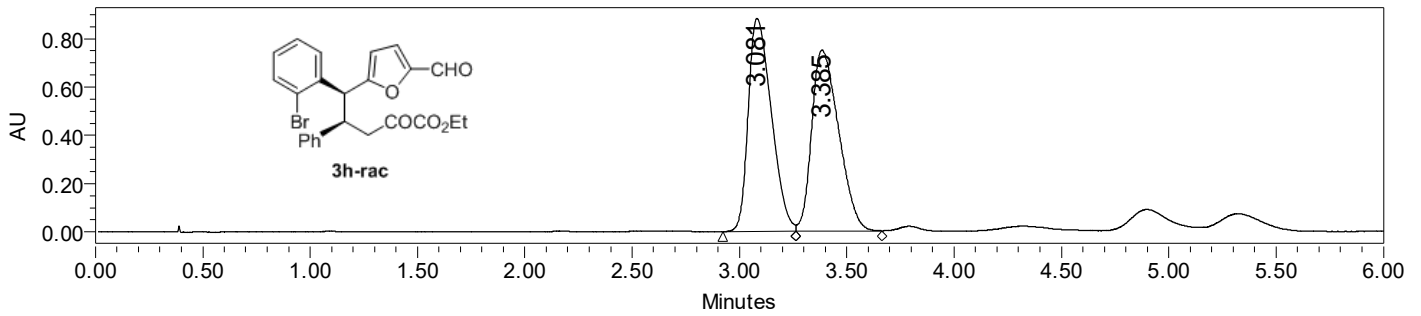**peak information:**

|   | RetTime (min) | Area (μV*s) | Area (%) | Height (μV) |
|---|---------------|-------------|----------|-------------|
| 1 | 3.081         | 6633118     | 50.21    | 882600      |
| 2 | 3.385         | 6578058     | 49.79    | 750360      |

Sample Name: 3h-ch  
Column: Chiralpak IG-3 95:5

Wave Length: 283.0nm

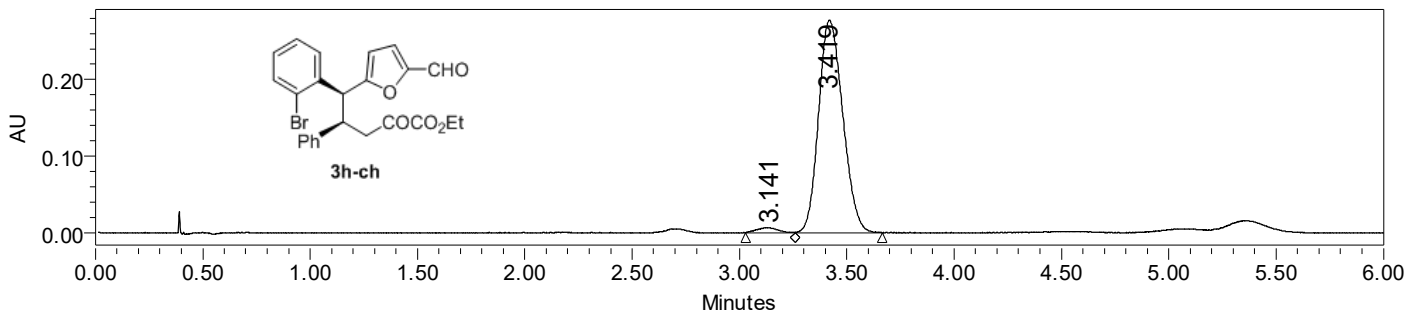**peak information:**

|   | RetTime (min) | Area (μV*s) | Area (%) | Height (μV) |
|---|---------------|-------------|----------|-------------|
| 1 | 3.141         | 41770       | 1.89     | 6268        |
| 2 | 3.419         | 2166041     | 98.11    | 276962      |

Sample Name: 3h<sup>1</sup>-rac  
Column: Chiralpak OD-3 95:5

Wave Length: 282.0nm

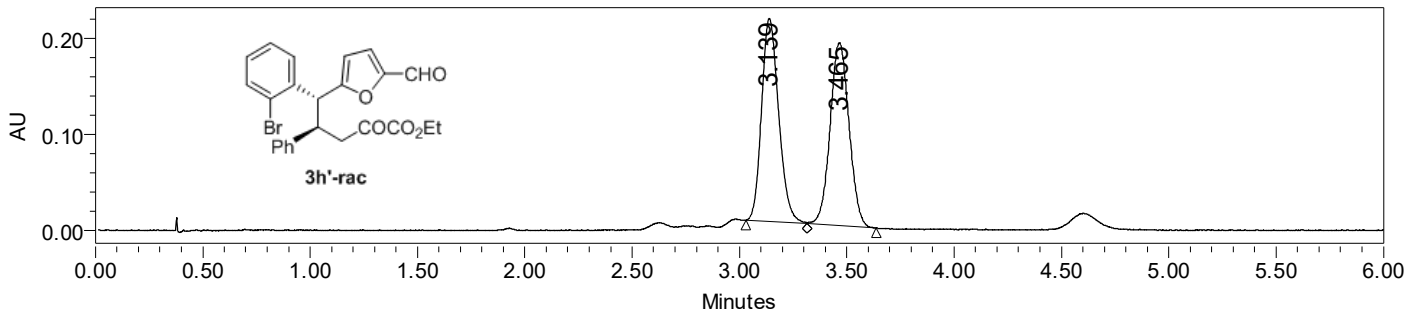**peak information:**

|   | RetTime (min) | Area (μV*s) | Area (%) | Height (μV) |
|---|---------------|-------------|----------|-------------|
| 1 | 3.139         | 1176648     | 50.18    | 211429      |
| 2 | 3.465         | 1168384     | 49.82    | 190788      |

Sample Name: 3h<sup>1</sup>-ch  
Column: Chiralpak OD-3 95:5

Wave Length: 282.0nm

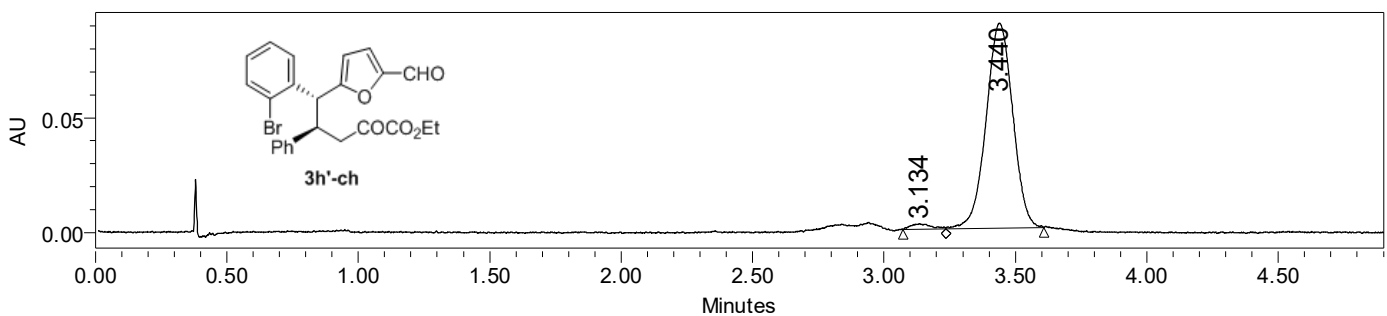**peak information:**

|   | RetTime (min) | Area (μV*s) | Area (%) | Height (μV) |
|---|---------------|-------------|----------|-------------|
| 1 | 3.134         | 12632       | 1.96     | 2458        |
| 2 | 3.440         | 630838      | 98.04    | 89221       |

Sample Name:

3i-rac

Wave Length:

285.0 纳米

Column:

Chiralpak IC-3 80:20

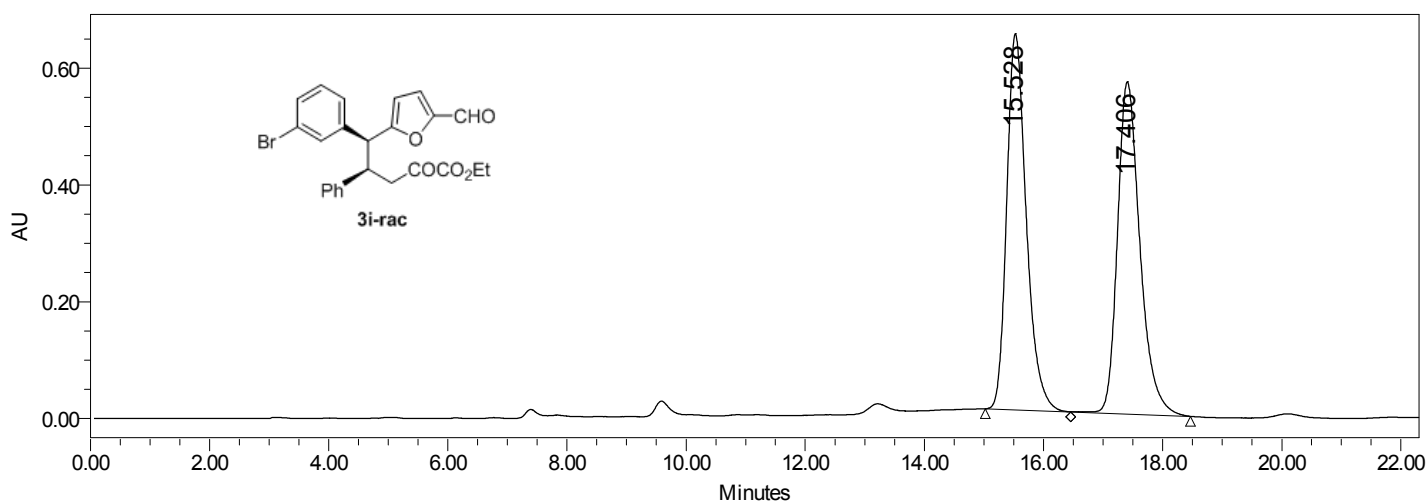

peak information

|   | RetTime (min) | Area ( $\mu\text{V}\cdot\text{s}$ ) | Area (%) | Height ( $\mu\text{V}$ ) |
|---|---------------|-------------------------------------|----------|--------------------------|
| 1 | 15.528        | 14697392                            | 49.68    | 644269                   |
| 2 | 17.406        | 14889057                            | 50.32    | 568963                   |

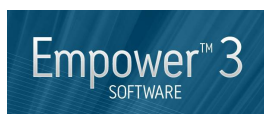

Sample Information

Sample Name:

3i-ch

Wave Length:

285.0 纳米

Column:

Chiralpak IC-3 80:20

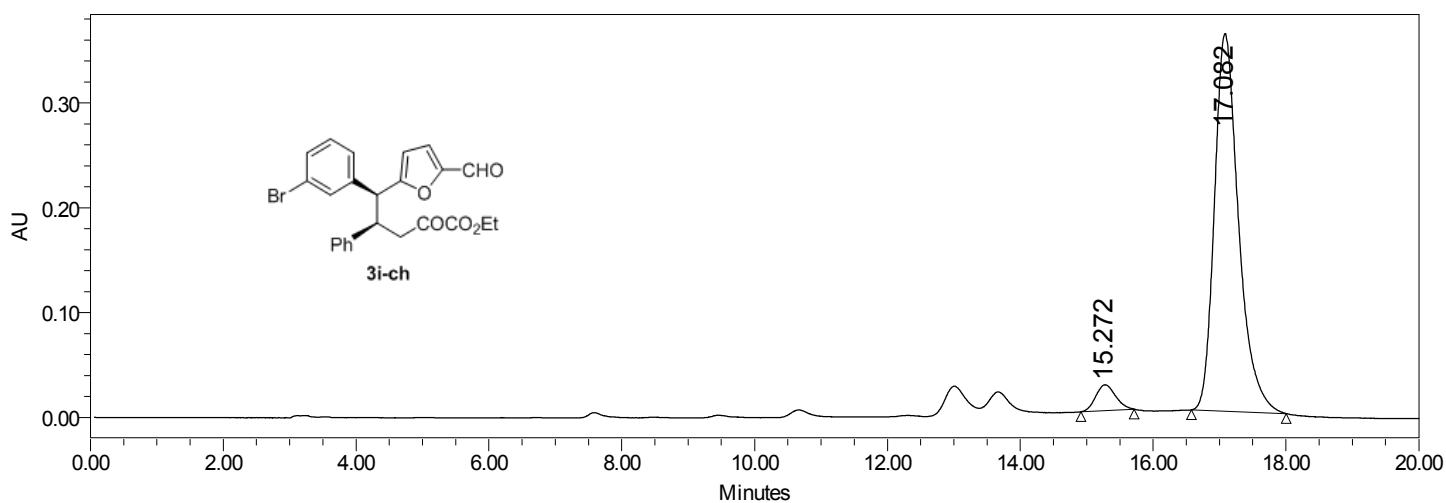

peak information

|   | RetTime (min) | Area ( $\mu\text{V}\cdot\text{s}$ ) | Area (%) | Height ( $\mu\text{V}$ ) |
|---|---------------|-------------------------------------|----------|--------------------------|
| 1 | 15.272        | 511894                              | 5.32     | 24653                    |
| 2 | 17.082        | 9106027                             | 94.68    | 359852                   |

Sample Name: 3i'-rac  
Column: Chiralpak ID-3 80:20

Wave Length: 284.0 纳米

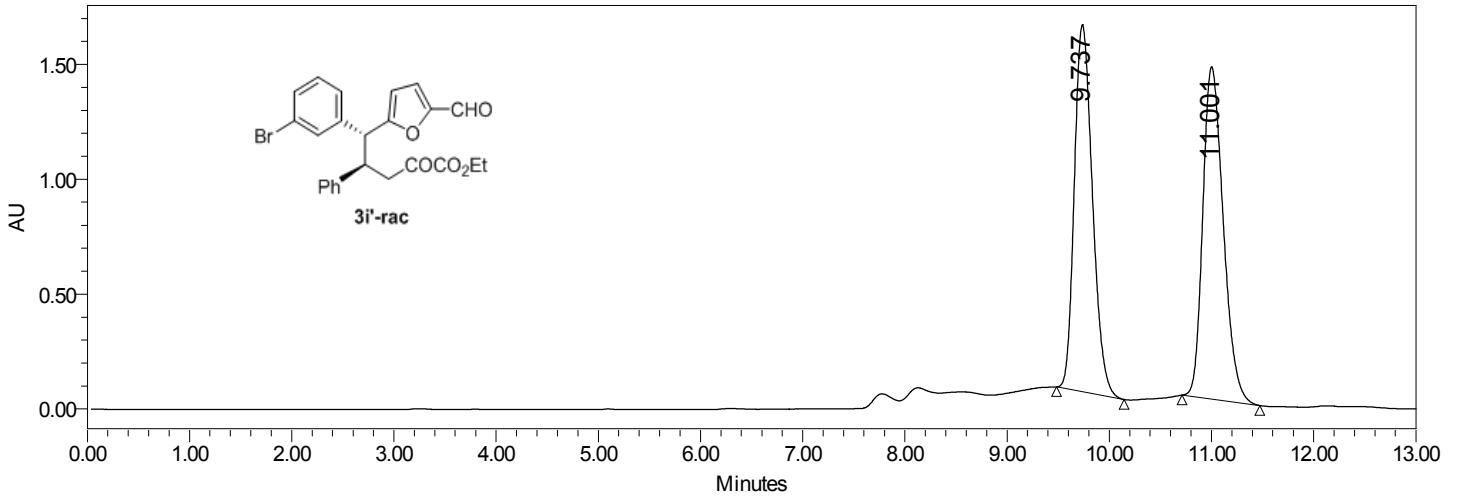

peak information

| RetTime (min) | Area (μV*s) | Area (%) | Height (μV) |
|---------------|-------------|----------|-------------|
| 1             | 19670926    | 49.46    | 1597467     |
| 2             | 20096503    | 50.54    | 1445622     |

Sample Name: 3i'-ch  
Column: Chiralpak ID-3 80:20

Wave Length: 284.0 纳米

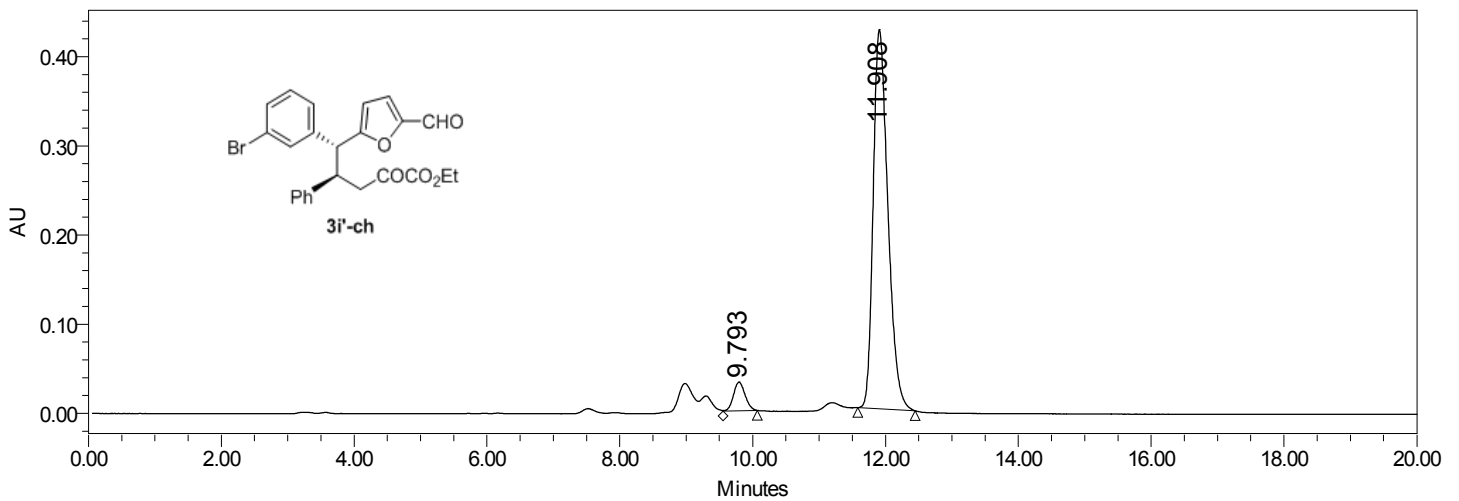

peak information

| RetTime (min) | Area (μV*s) | Area (%) | Height (μV) |
|---------------|-------------|----------|-------------|
| 1             | 390019      | 5.64     | 32124       |
| 2             | 6526220     | 94.36    | 425289      |

Sample Name: 3j-rac  
Column: Chiralpak AD-3 95:5

Wave Length: 283.0nm

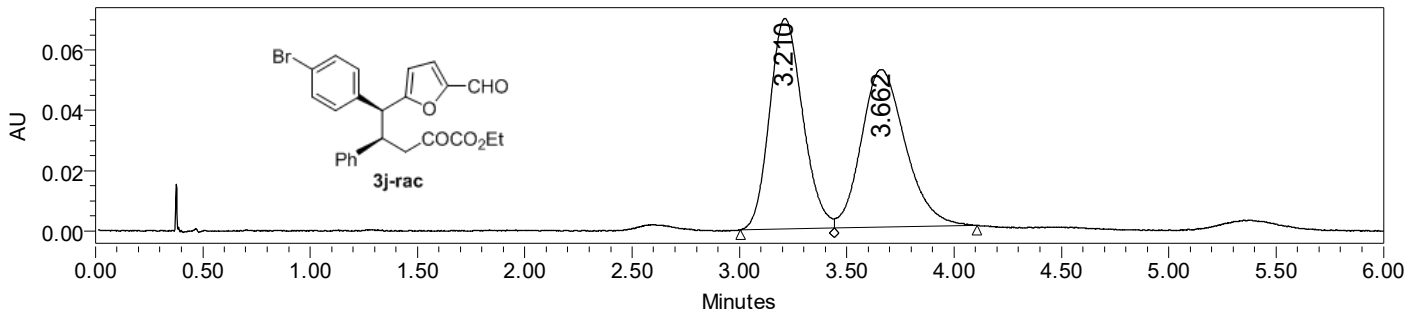**peak information:**

|   | RetTime (min) | Area (μV*s) | Area (%) | Height (μV) |
|---|---------------|-------------|----------|-------------|
| 1 | 3.210         | 749875      | 49.99    | 69842       |
| 2 | 3.662         | 750233      | 50.01    | 52344       |

Sample Name: 3j-ch  
Column: Chiralpak AD-3 95:5

Wave Length: 283.0nm

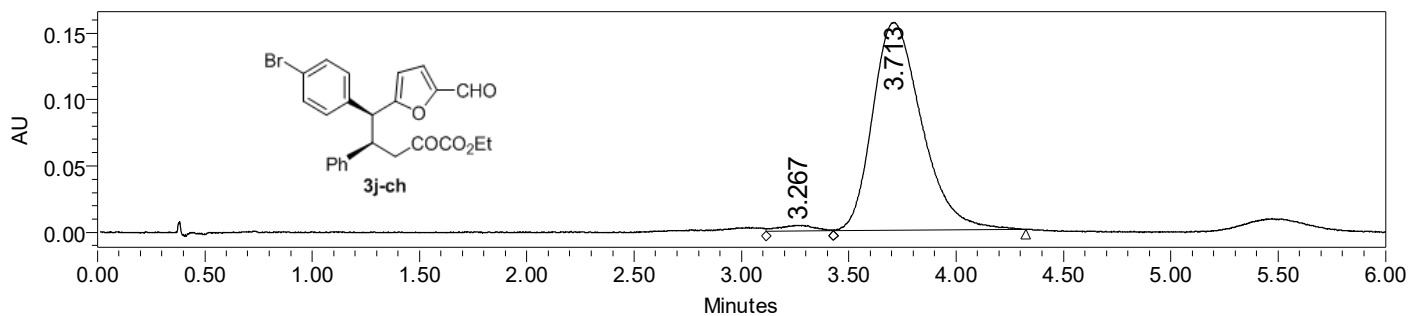**peak information:**

|   | RetTime (min) | Area (μV*s) | Area (%) | Height (μV) |
|---|---------------|-------------|----------|-------------|
| 1 | 3.267         | 48085       | 1.89     | 4298        |
| 2 | 3.713         | 2496268     | 98.11    | 156710      |

Sample Name: 3j'-rac  
Column: Chiralpak AD-3 95:5

Wave Length: 282.0nm

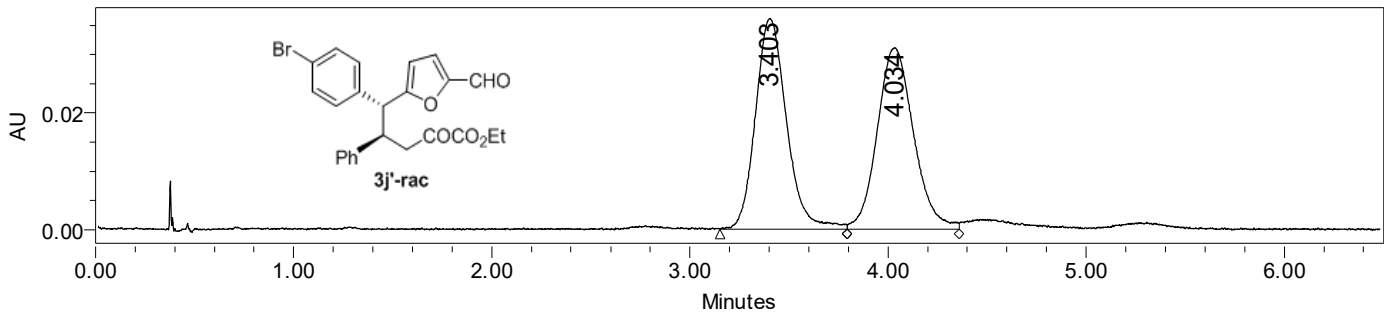**peak information:**

|   | RetTime (min) | Area (μV*s) | Area (%) | Height (μV) |
|---|---------------|-------------|----------|-------------|
| 1 | 3.403         | 394686      | 49.90    | 36135       |
| 2 | 4.034         | 396269      | 50.10    | 31052       |

Sample Name: 3j'-ch  
Column: Chiralpak AD-3 95:5

Wave Length: 282.0nm

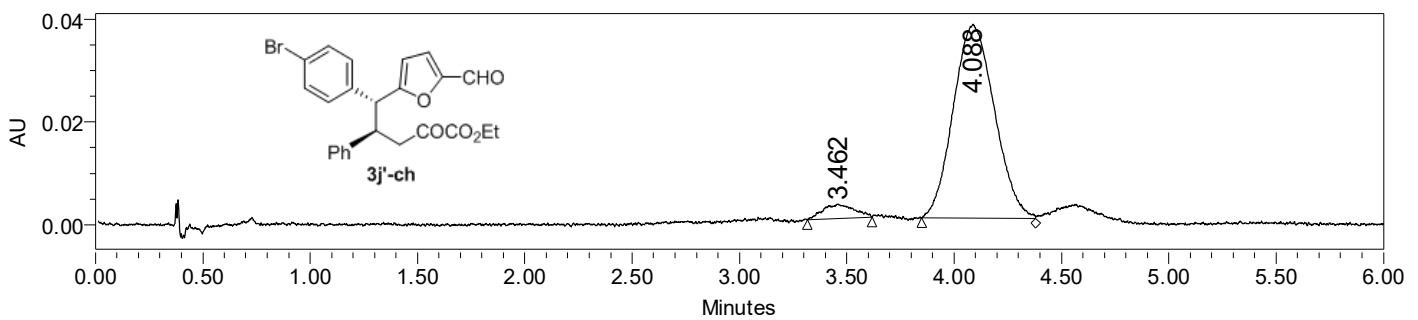**peak information:**

|   | RetTime (min) | Area (μV*s) | Area (%) | Height (μV) |
|---|---------------|-------------|----------|-------------|
| 1 | 3.462         | 28923       | 5.43     | 2778        |
| 2 | 4.088         | 503276      | 94.57    | 37680       |



Sample Name: 3k-rac  
Column: Chiralpak IC-3 80:20

Wave Length: 284.0 纳米

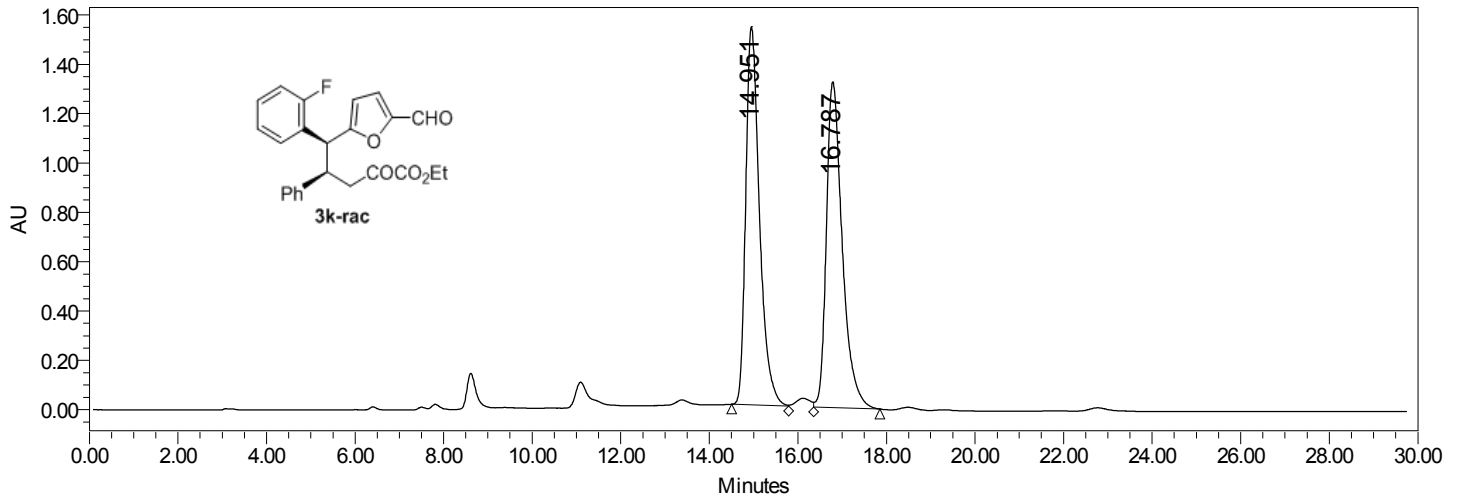

peak information

|   | RetTime (min) | Area (μV*s) | Area (%) | Height (μV) |
|---|---------------|-------------|----------|-------------|
| 1 | 14.951        | 33026976    | 50.16    | 1532899     |
| 2 | 16.787        | 32811129    | 49.84    | 1319526     |

Sample Name: 3k-ch  
Column: Chiralpak IC-3 80:20

Wave Length: 284.0 纳米

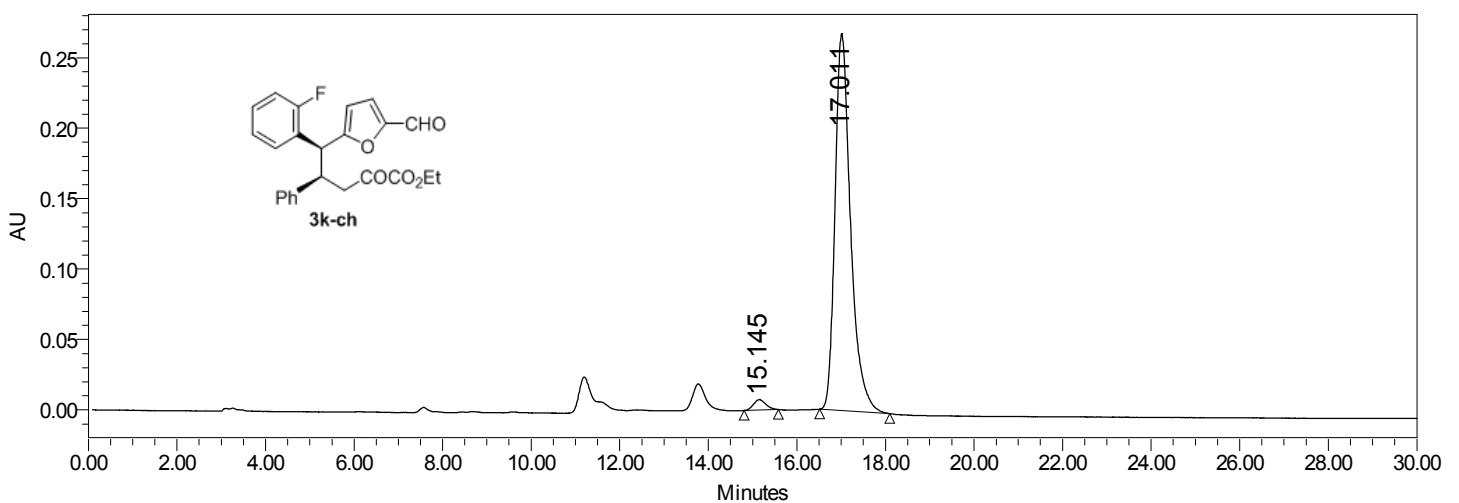

peak information

|   | RetTime (min) | Area (μV*s) | Area (%) | Height (μV) |
|---|---------------|-------------|----------|-------------|
| 1 | 15.145        | 142301      | 2.13     | 7369        |
| 2 | 17.011        | 6551224     | 97.87    | 267679      |

Sample Name: 3k'-rac  
Column: Chiralpak IG-3 95:5

Wave Length: 280.0nm

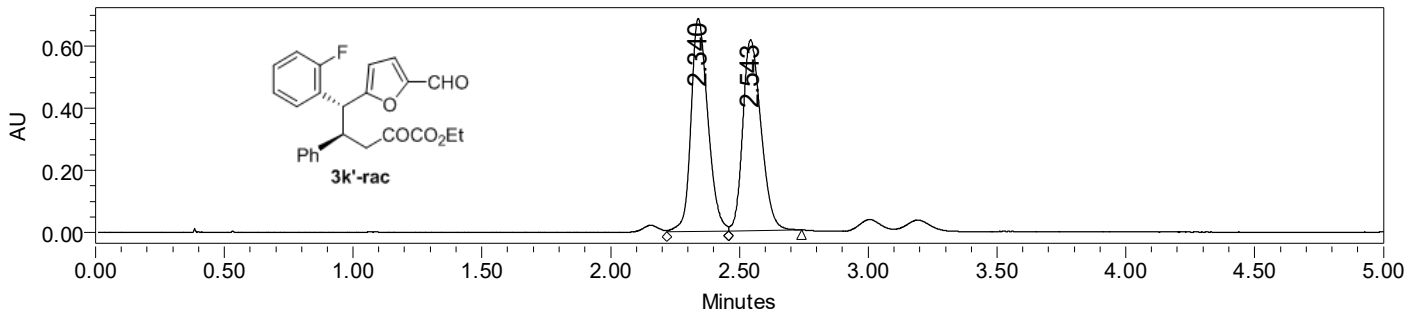**peak information:**

|   | RetTime (min) | Area (μV*s) | Area (%) | Height (μV) |
|---|---------------|-------------|----------|-------------|
| 1 | 2.340         | 3134770     | 50.82    | 686011      |
| 2 | 2.543         | 3033733     | 49.18    | 614450      |

Sample Name: 3k'-ch  
Column: Chiralpak IG-3 95:5

Wave Length: 280.0nm

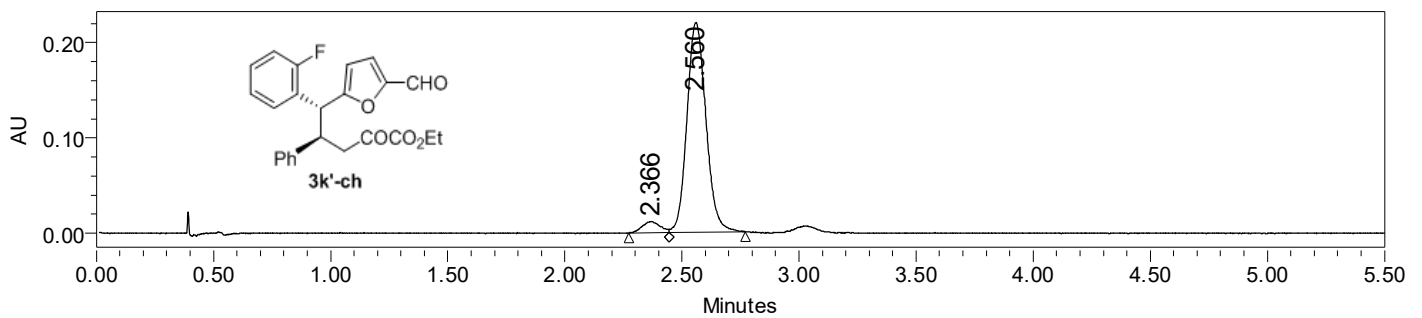**peak information:**

|   | RetTime (min) | Area (μV*s) | Area (%) | Height (μV) |
|---|---------------|-------------|----------|-------------|
| 1 | 2.366         | 62725       | 4.80     | 11799       |
| 2 | 2.560         | 1242873     | 95.20    | 219963      |

Sample Name: 3l-rac

Wave Length: 283.0nm

Column: Chiralpak IG-3 95:5

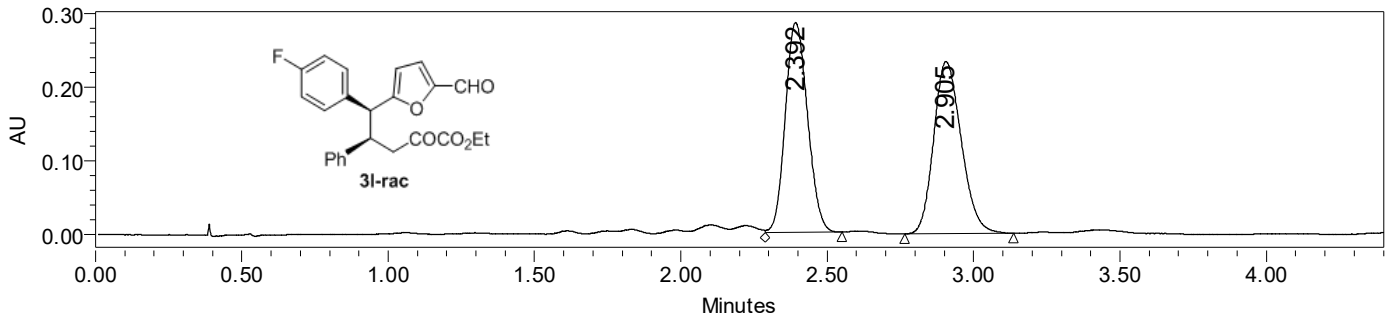**peak information:**

|   | RetTime (min) | Area (μV*s) | Area (%) | Height (μV) |
|---|---------------|-------------|----------|-------------|
| 1 | 2.392         | 1509973     | 49.61    | 285359      |
| 2 | 2.905         | 1533433     | 50.39    | 234279      |

Sample Name: 3l-ch

Wave Length: 283.0nm

Column: Chiralpak IG-3 95:5

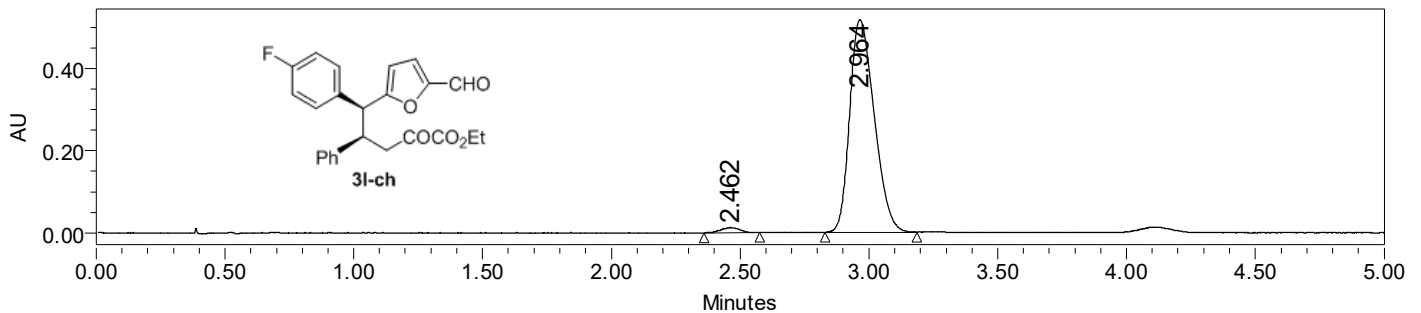**peak information:**

|   | RetTime (min) | Area (μV*s) | Area (%) | Height (μV) |
|---|---------------|-------------|----------|-------------|
| 1 | 2.462         | 67737       | 1.94     | 12758       |
| 2 | 2.964         | 3419417     | 98.06    | 516761      |

Sample Name: 3l'-rac  
Column: Chiralpak IG-3 95:5

Wave Length: 282.0nm

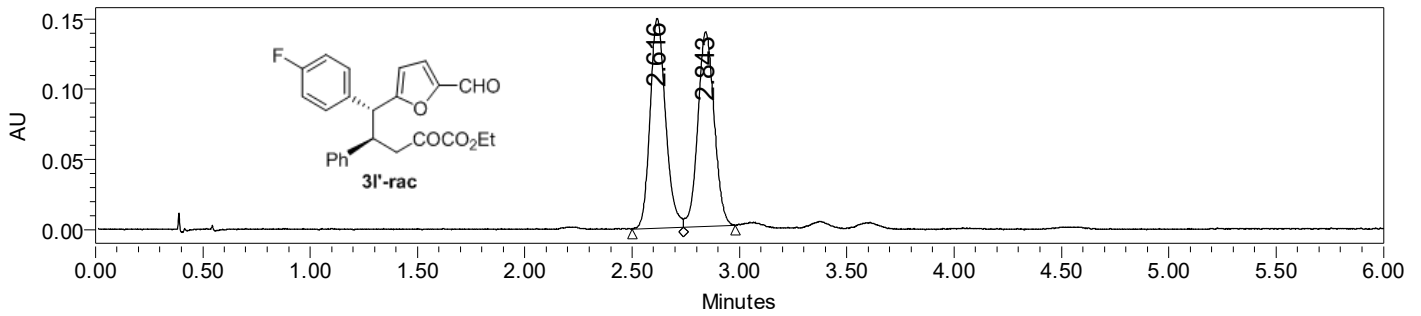**peak information:**

|   | RetTime (min) | Area (μV*s) | Area (%) | Height (μV) |
|---|---------------|-------------|----------|-------------|
| 1 | 2.616         | 751167      | 50.62    | 149228      |
| 2 | 2.843         | 732698      | 49.38    | 138539      |

Sample Name: 3l'-ch  
Column: Chiralpak IG-3 95:5

Wave Length: 282.0nm

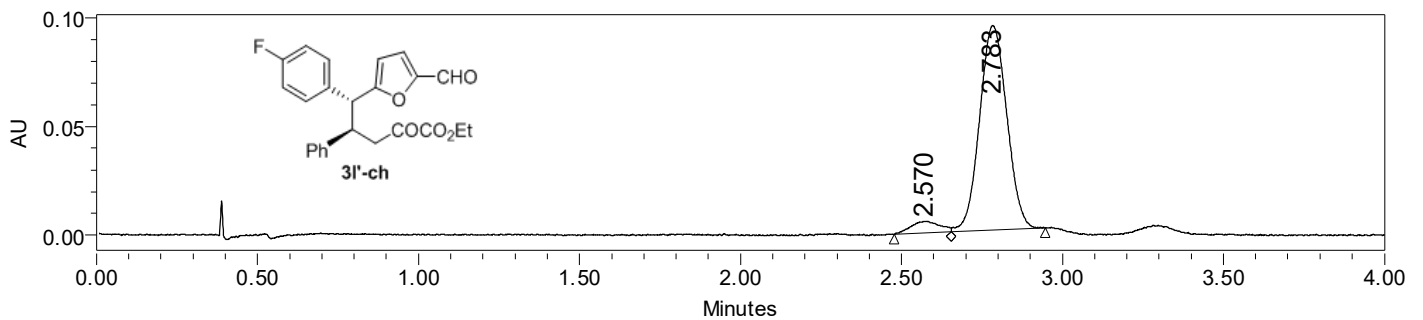**peak information:**

|   | RetTime (min) | Area (μV*s) | Area (%) | Height (μV) |
|---|---------------|-------------|----------|-------------|
| 1 | 2.570         | 33249       | 5.66     | 5253        |
| 2 | 2.783         | 554377      | 94.34    | 94124       |

Sample Name: 3m-rac  
Column: Chiralpak IG-3 95:5

Wave Length: 285.0nm

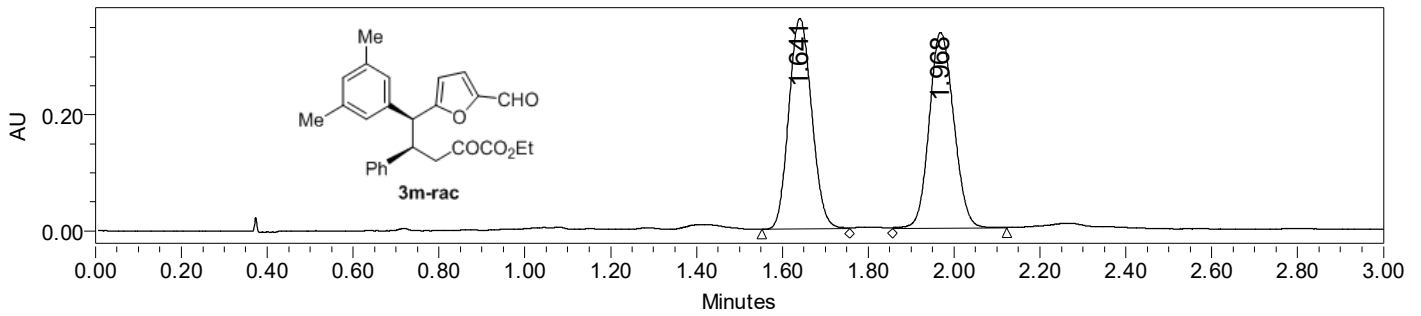**peak information:**

|   | RetTime (min) | Area (μV*s) | Area (%) | Height (μV) |
|---|---------------|-------------|----------|-------------|
| 1 | 1.641         | 1346175     | 50.20    | 362828      |
| 2 | 1.968         | 1335657     | 49.80    | 337102      |

Sample Name: 3m-ch  
Column: Chiralpak IG-3 95:5

Wave Length: 285.0nm

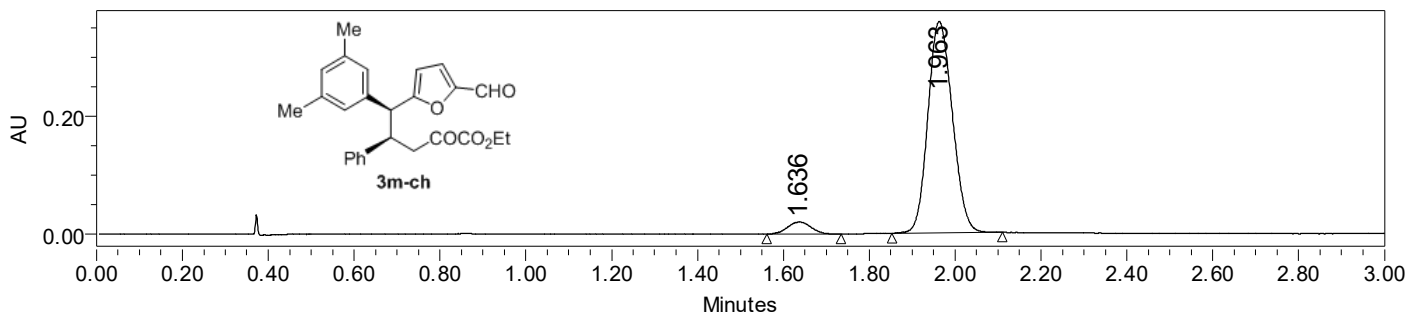**peak information:**

|   | RetTime (min) | Area (μV*s) | Area (%) | Height (μV) |
|---|---------------|-------------|----------|-------------|
| 1 | 1.636         | 76450       | 5.09     | 20288       |
| 2 | 1.963         | 1424075     | 94.91    | 359235      |

Sample Name: 3m'-rac  
Column: Chiralpak IG-3 95:5

Wave Length: 284.0nm

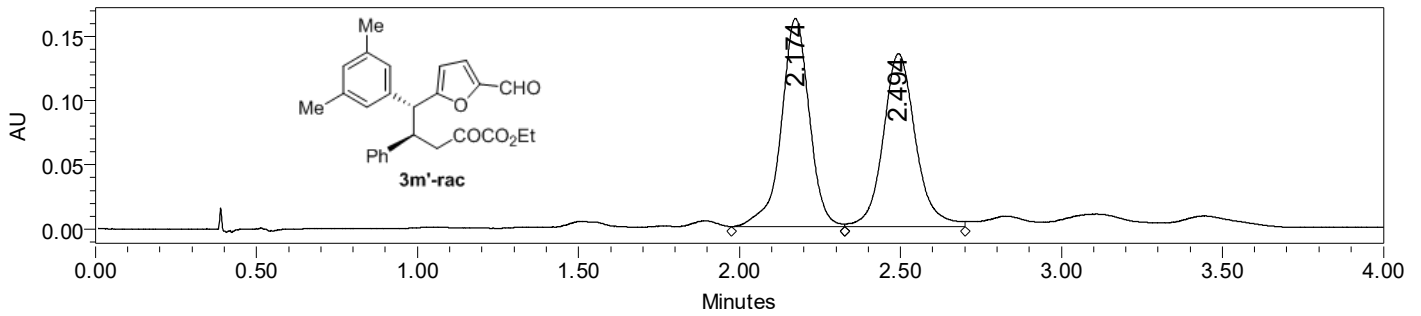**peak information:**

|   | RetTime (min) | Area (μV*s) | Area (%) | Height (μV) |
|---|---------------|-------------|----------|-------------|
| 1 | 2.174         | 979280      | 51.00    | 162052      |
| 2 | 2.494         | 940706      | 49.00    | 134781      |

Sample Name: 3m'-ch  
Column: Chiralpak IG-3 95:5

Wave Length: 284.0nm

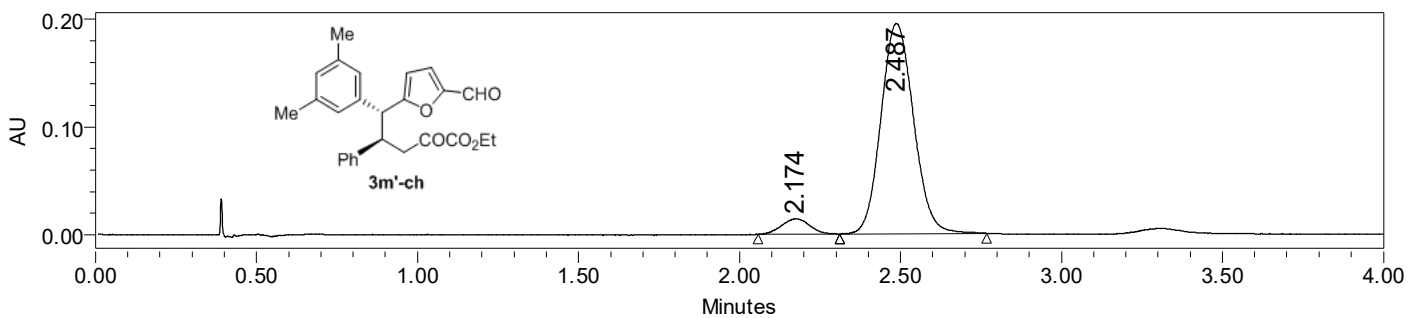**peak information:**

|   | RetTime (min) | Area (μV*s) | Area (%) | Height (μV) |
|---|---------------|-------------|----------|-------------|
| 1 | 2.174         | 85702       | 5.87     | 14144       |
| 2 | 2.487         | 1374064     | 94.13    | 195190      |

Sample Name:

3n-rac

Wave Length:

285.0nm

Column:

Trefoil TM CEL1 95:5

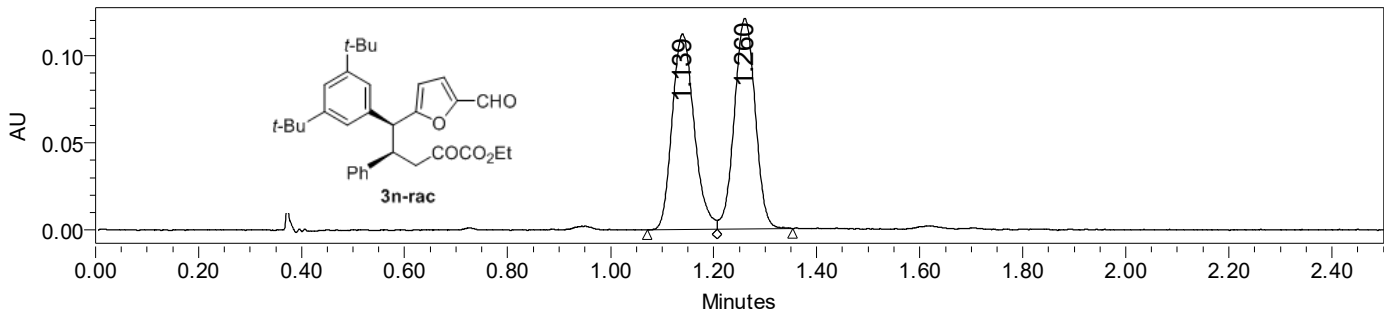**peak information:**

|   | RetTime (min) | Area (μV*s) | Area (%) | Height (μV) |
|---|---------------|-------------|----------|-------------|
| 1 | 1.139         | 332273      | 49.60    | 112138      |
| 2 | 1.260         | 337620      | 50.40    | 120604      |

Sample Name:

3n-ch

Wave Length:

285.0nm

Column:

Trefoil TM CEL1 95:5

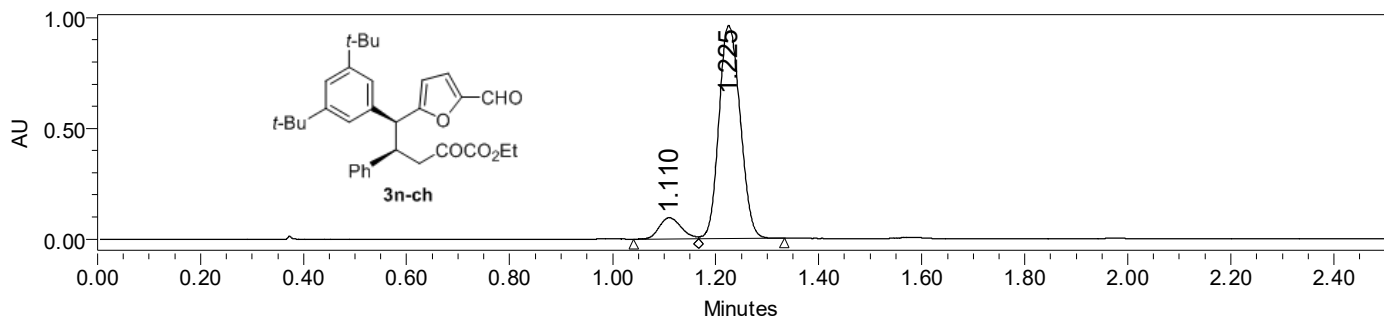**peak information:**

|   | RetTime (min) | Area (μV*s) | Area (%) | Height (μV) |
|---|---------------|-------------|----------|-------------|
| 1 | 1.110         | 284099      | 9.34     | 95734       |
| 2 | 1.225         | 2757435     | 90.66    | 962465      |

Sample Name: 3n'-rac Wave Length: 285.0 纳米

Column: Chiralpak ID-3 90:10

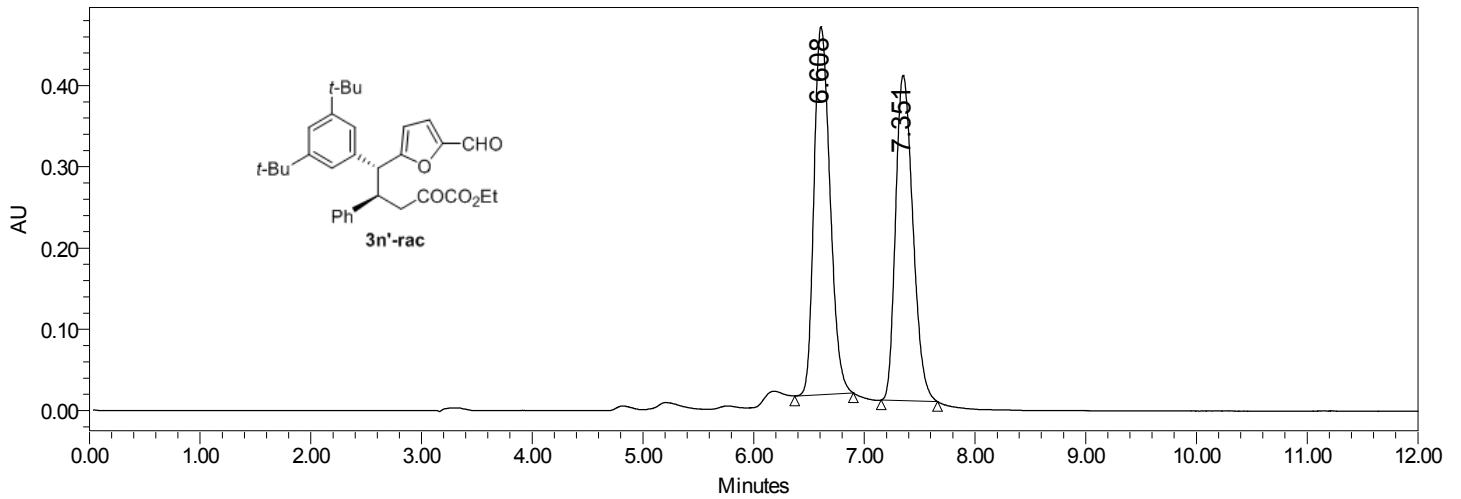

peak information

| RetTime (min) | Area (μV*s) | Area (%) | Height (μV) |        |
|---------------|-------------|----------|-------------|--------|
| 1             | 6.608       | 4554928  | 51.18       | 452779 |
| 2             | 7.351       | 4344870  | 48.82       | 400305 |

Sample Name: 3n'-ch Wave Length: 285.0 纳米

Column: Chiralpak ID-3 90:10

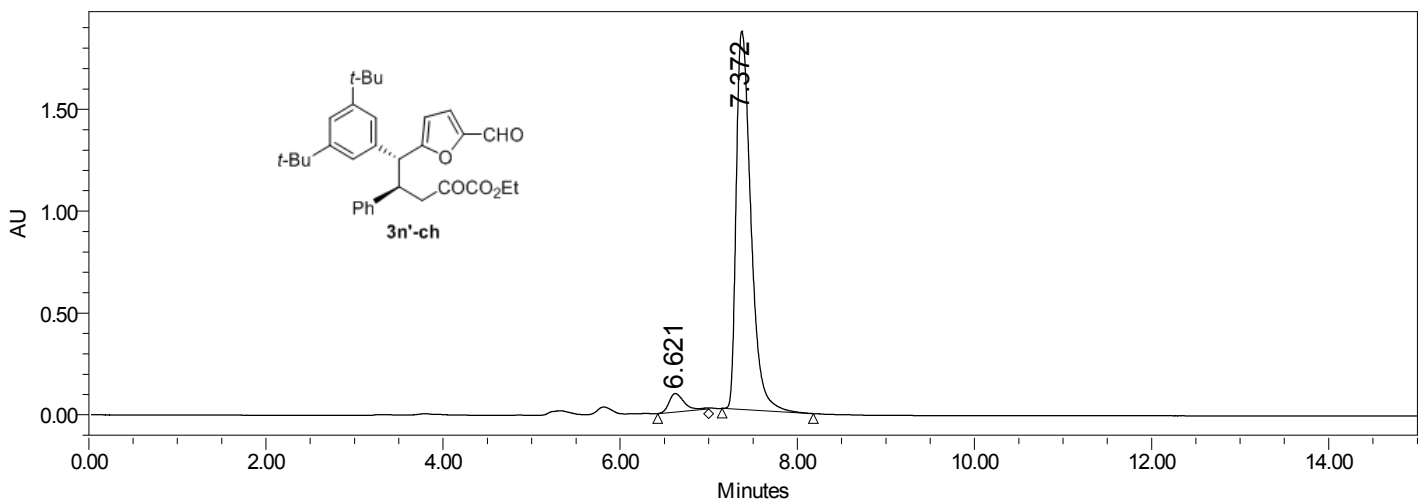

peak information

| RetTime (min) | Area (μV*s) | Area (%) | Height (μV) |         |
|---------------|-------------|----------|-------------|---------|
| 1             | 6.621       | 1079850  | 4.82        | 90799   |
| 2             | 7.372       | 21315536 | 95.18       | 1857845 |



Sample Name: 3o-rac

Wave Length: 285.0 纳米

Column: Chiralpak ID-3 80:20

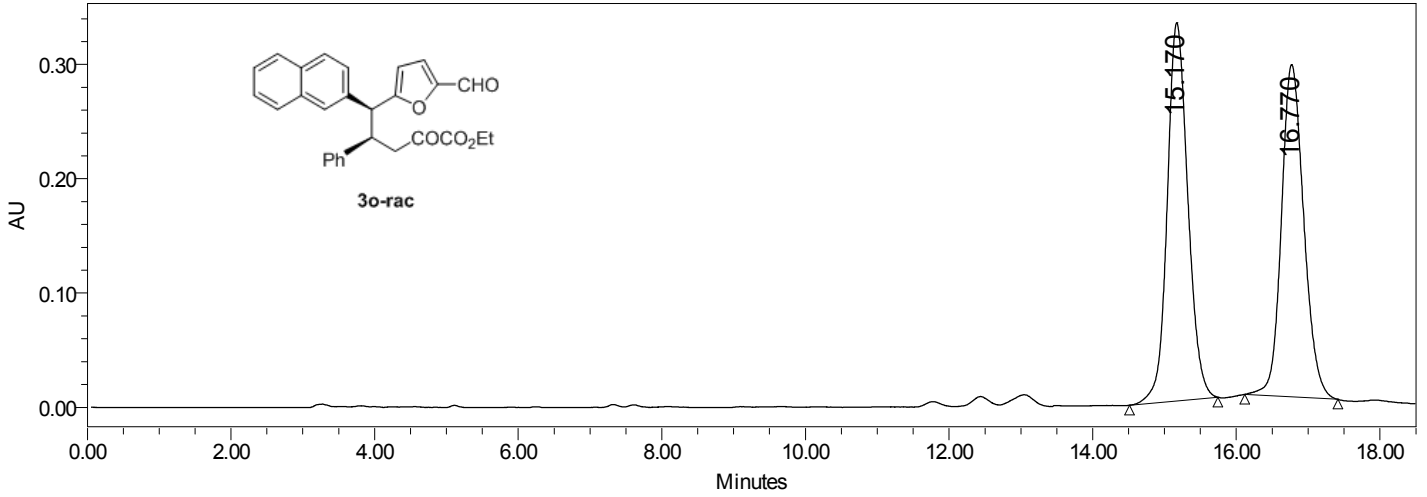

peak information

| RetTime (min) | Area (μV*s) | Area (%) | Height (μV) |        |
|---------------|-------------|----------|-------------|--------|
| 1             | 15.170      | 6601442  | 51.18       | 330915 |
| 2             | 16.770      | 6295998  | 48.82       | 290734 |

Sample Name: 3o-ch

Wave Length: 285.0 纳米

Column: Chiralpak ID-3 80:20

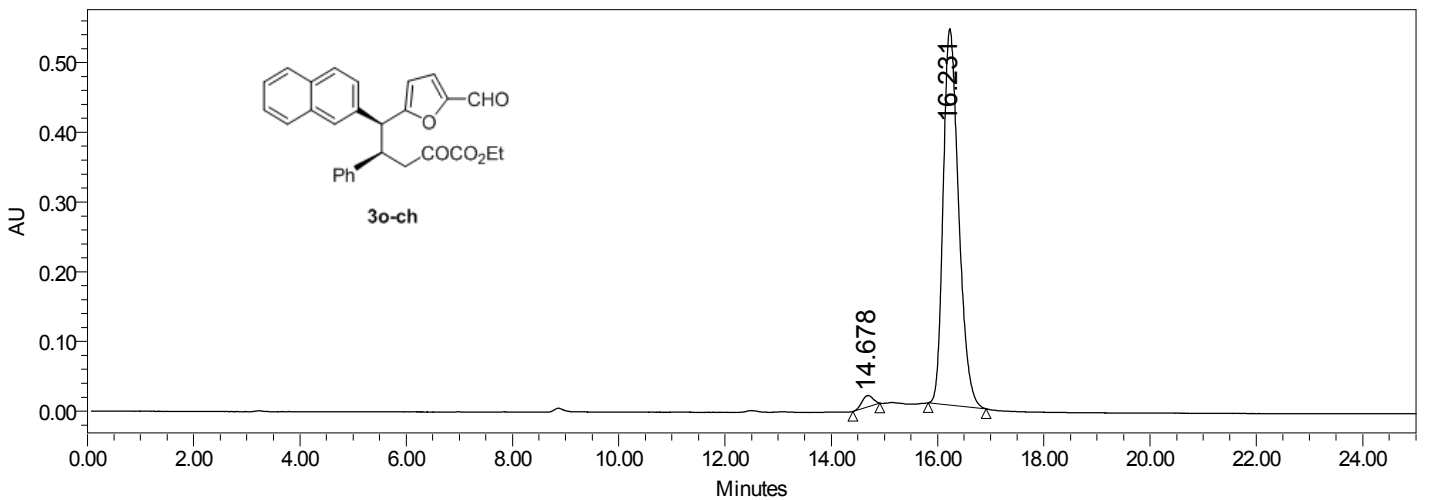

peak information

| RetTime (min) | Area (μV*s) | Area (%) | Height (μV) |        |
|---------------|-------------|----------|-------------|--------|
| 1             | 14.678      | 237186   | 2.13        | 16415  |
| 2             | 16.231      | 10899402 | 97.87       | 539483 |

Sample Name: 3o'-rac  
Column: Chiralpak IG-3 90:10

Wave Length: 284.0nm

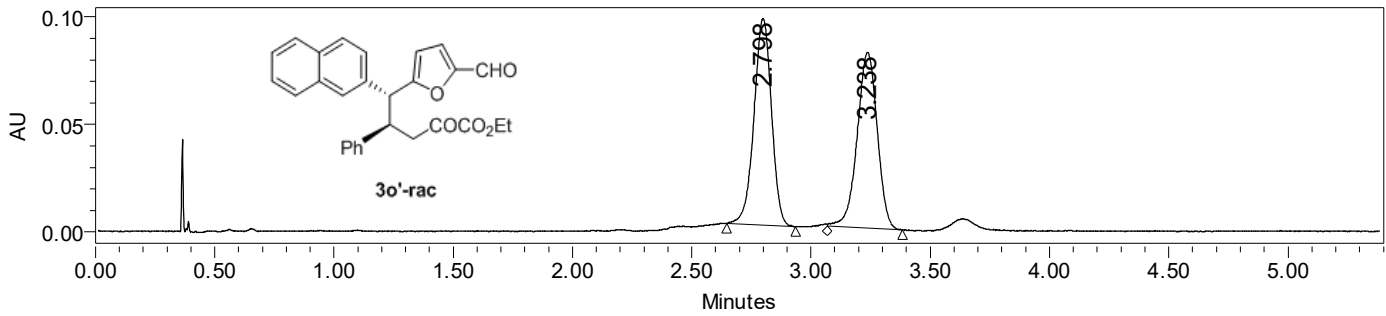**peak information:**

|   | RetTime (min) | Area (μV*s) | Area (%) | Height (μV) |
|---|---------------|-------------|----------|-------------|
| 1 | 2.798         | 491290      | 50.53    | 96043       |
| 2 | 3.238         | 480895      | 49.47    | 81860       |

Sample Name: 3o'-ch  
Column: Chiralpak IG-3 90:10

Wave Length: 284.0nm

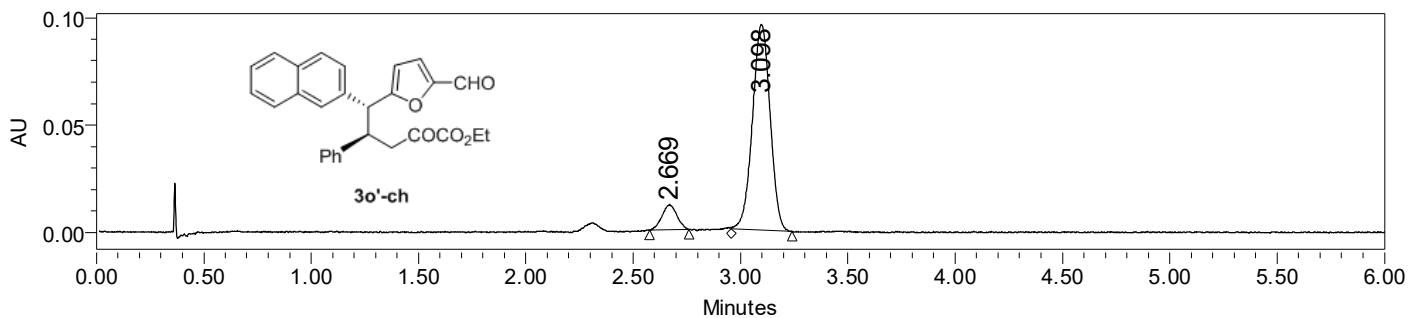**peak information:**

|   | RetTime (min) | Area (μV*s) | Area (%) | Height (μV) |
|---|---------------|-------------|----------|-------------|
| 1 | 2.669         | 57770       | 9.52     | 11764       |
| 2 | 3.098         | 549306      | 90.48    | 95873       |

Sample Name: 4a-rac  
Column: Chiralpak IG-3 95:5

Wave Length: 284.0nm

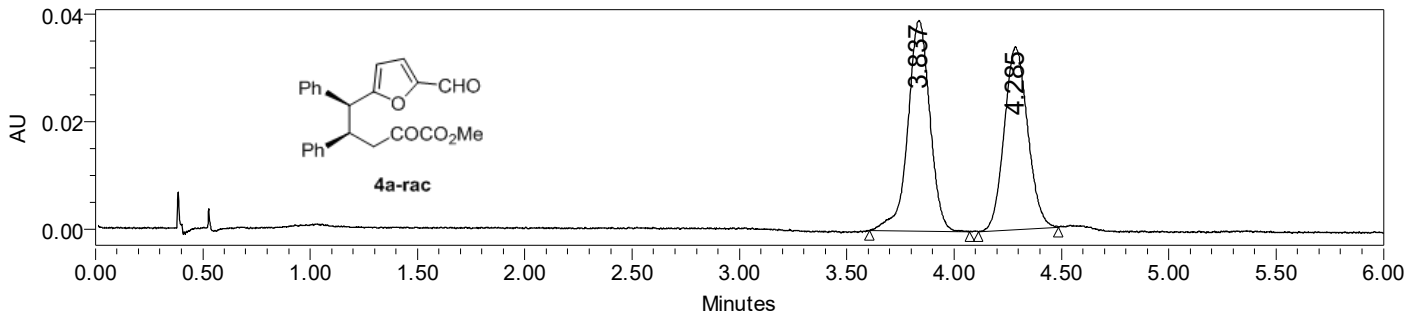**peak information:**

|   | RetTime (min) | Area (μV*s) | Area (%) | Height (μV) |
|---|---------------|-------------|----------|-------------|
| 1 | 3.837         | 277914      | 51.85    | 39138       |
| 2 | 4.285         | 258115      | 48.15    | 34008       |

Sample Name: 4a-ch  
Column: Chiralpak IG-3 95:5

Wave Length: 283.0nm

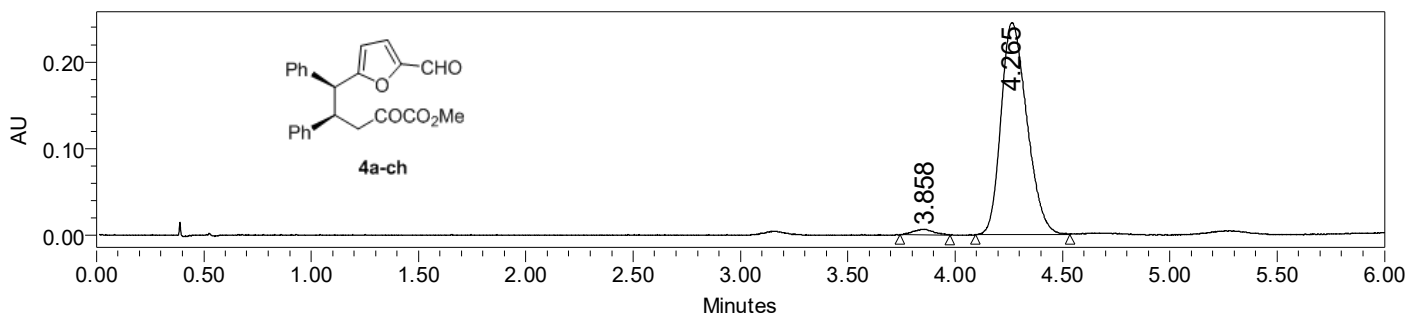**peak information:**

|   | RetTime (min) | Area (μV*s) | Area (%) | Height (μV) |
|---|---------------|-------------|----------|-------------|
| 1 | 3.858         | 40998       | 1.96     | 6011        |
| 2 | 4.265         | 2049068     | 98.04    | 244811      |

Sample Name: 4a'-rac  
Column: Chiralpak OD-3 95:5

Wave Length: 283.0nm

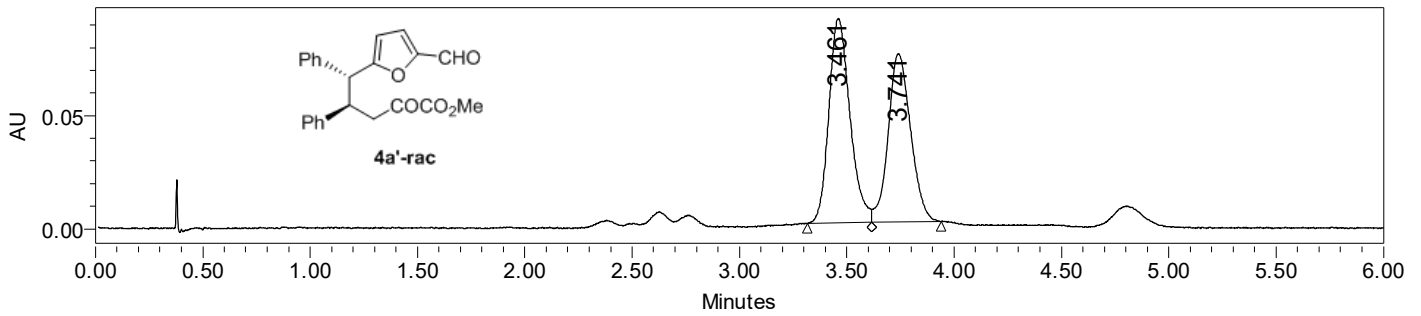**peak information:**

|   | RetTime (min) | Area (μV*s) | Area (%) | Height (μV) |
|---|---------------|-------------|----------|-------------|
| 1 | 3.461         | 616427      | 53.23    | 90257       |
| 2 | 3.741         | 541510      | 46.77    | 74406       |

Sample Name: 4a'-ch  
Column: Chiralpak OD-3 95:5

Wave Length: 283.0nm

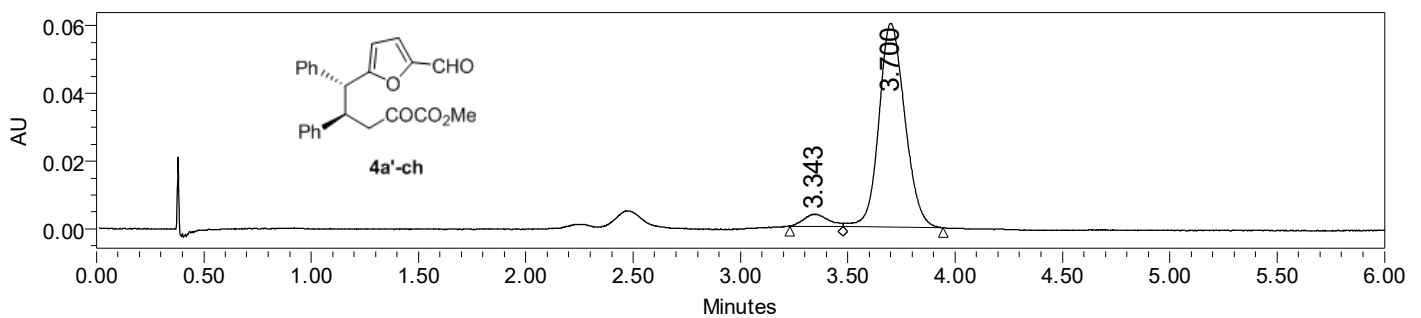**peak information:**

|   | RetTime (min) | Area (μV*s) | Area (%) | Height (μV) |
|---|---------------|-------------|----------|-------------|
| 1 | 3.343         | 28905       | 5.40     | 3573        |
| 2 | 3.700         | 506027      | 94.60    | 60151       |

Sample Name: 4b-rac Wave Length: 283.0nm  
Column: Chiralpak IG-3 95:5

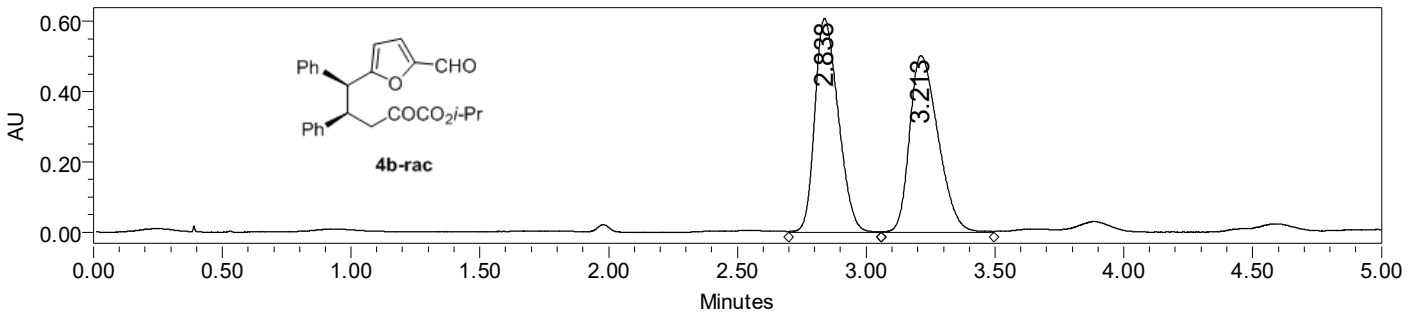**peak information:**

|   | RetTime (min) | Area (μV*s) | Area (%) | Height (μV) |
|---|---------------|-------------|----------|-------------|
| 1 | 2.838         | 3853201     | 50.04    | 608869      |
| 2 | 3.213         | 3847806     | 49.96    | 503109      |

Sample Name: 4b-ch Wave Length: 283.0nm  
Column: Chiralpak IG-3 95:5

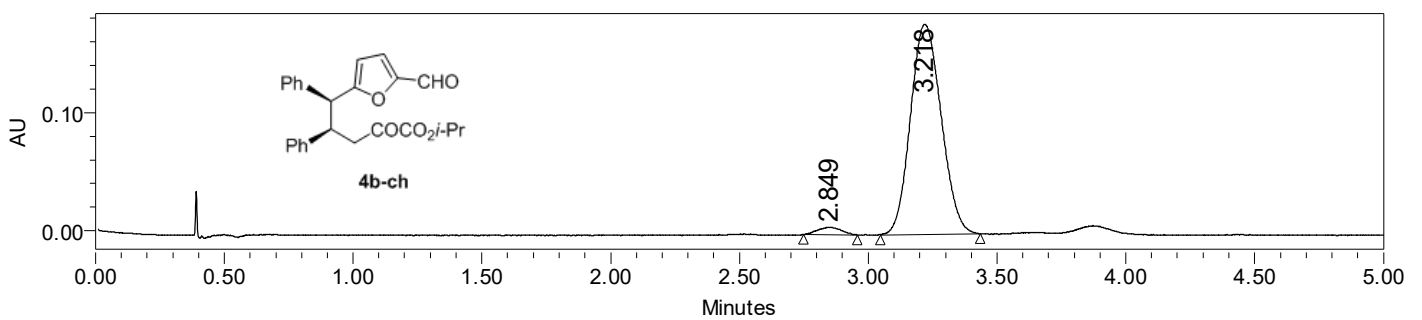**peak information:**

|   | RetTime (min) | Area (μV*s) | Area (%) | Height (μV) |
|---|---------------|-------------|----------|-------------|
| 1 | 2.849         | 40150       | 2.65     | 6188        |
| 2 | 3.218         | 1473793     | 97.35    | 177948      |

Sample Name: 4b'-rac  
Column: Chiralpak IG-3 95:5

Wave Length: 283.0nm

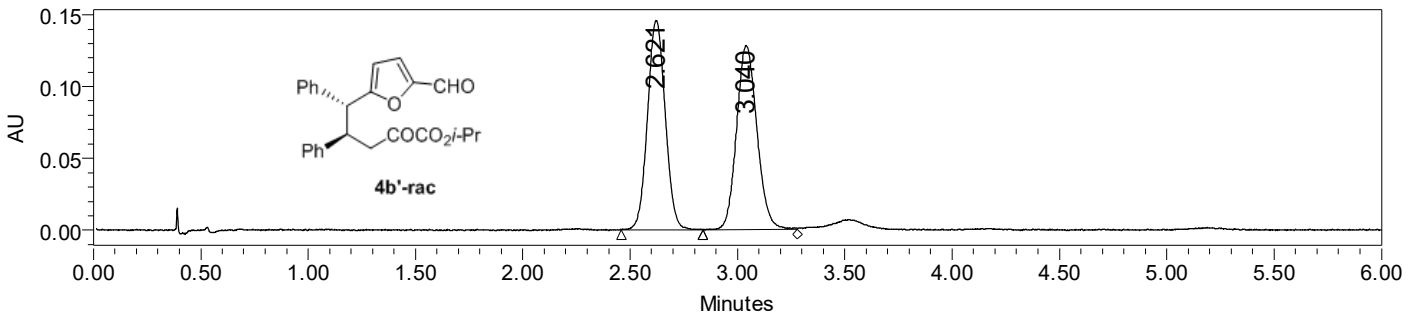**peak information:**

|   | RetTime (min) | Area (μV*s) | Area (%) | Height (μV) |
|---|---------------|-------------|----------|-------------|
| 1 | 2.621         | 840921      | 49.76    | 145818      |
| 2 | 3.040         | 848926      | 50.24    | 128296      |

Sample Name: 4b'-ch  
Column: Chiralpak IG-3 95:5

Wave Length: 283.0nm

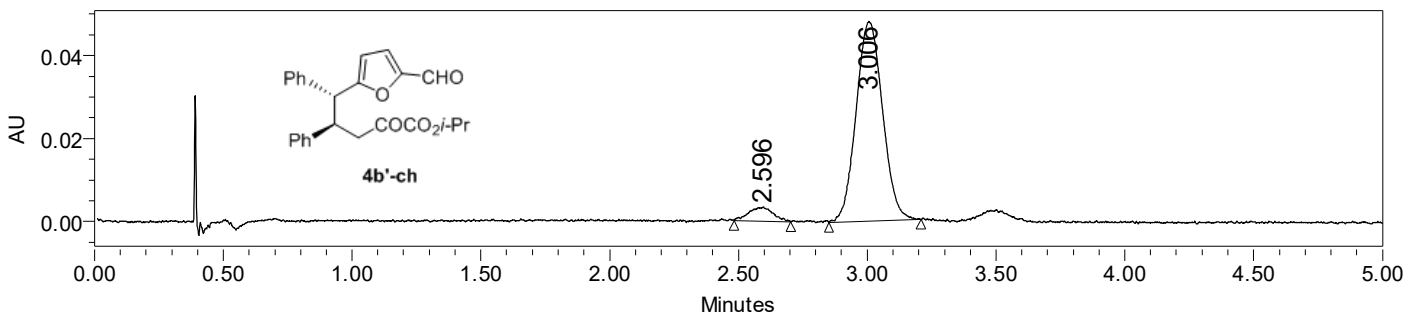**peak information:**

|   | RetTime (min) | Area (μV*s) | Area (%) | Height (μV) |
|---|---------------|-------------|----------|-------------|
| 1 | 2.596         | 21612       | 5.90     | 3313        |
| 2 | 3.006         | 344427      | 94.10    | 48133       |

Sample Name: 4c-rac  
Column: Chiralpak IG-3 90:10

Wave Length: 285.0nm

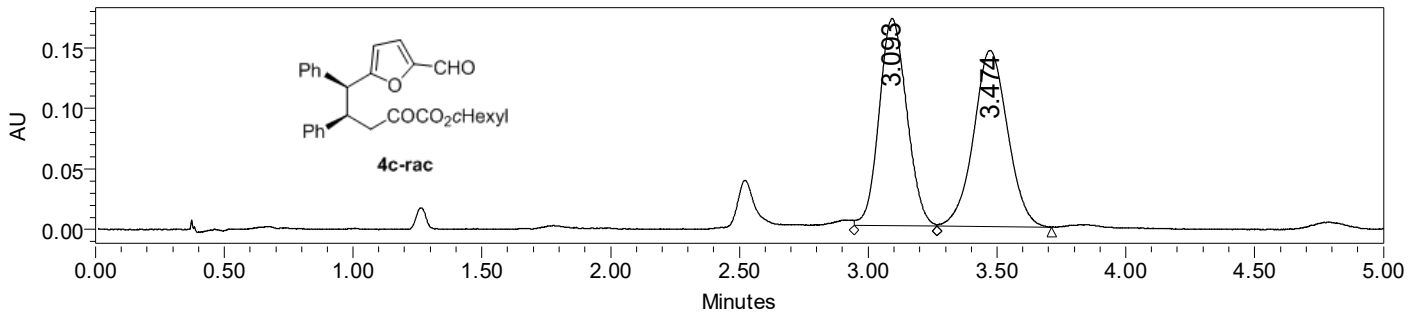

peak information:

|   | RetTime (min) | Area (μV*s) | Area (%) | Height (μV) |
|---|---------------|-------------|----------|-------------|
| 1 | 3.093         | 1271100     | 48.74    | 170732      |
| 2 | 3.474         | 1336611     | 51.26    | 145197      |

Sample Name: 4c-ch  
Column: Chiralpak IG-3 90:10

Wave Length: 285.0nm

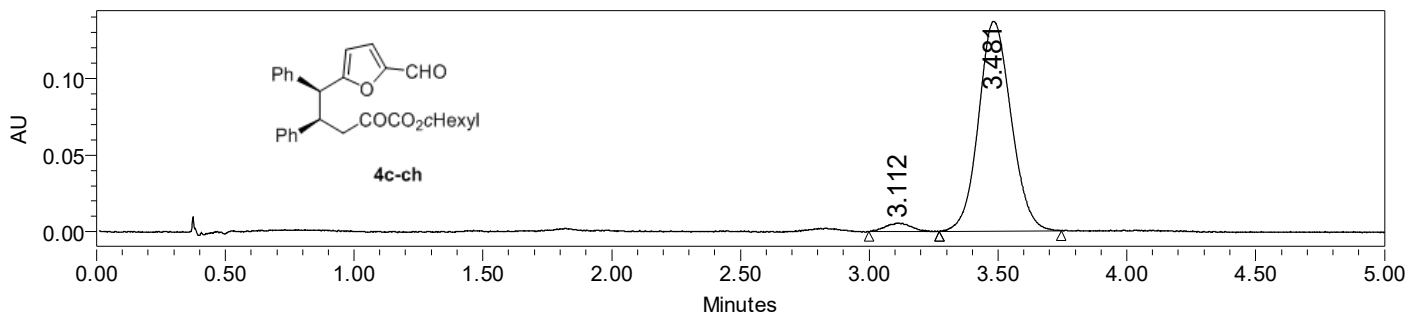

peak information:

|   | RetTime (min) | Area (μV*s) | Area (%) | Height (μV) |
|---|---------------|-------------|----------|-------------|
| 1 | 3.112         | 38242       | 3.05     | 5567        |
| 2 | 3.481         | 1213567     | 96.95    | 137105      |

Sample Name: 4c'-rac Wave Length: 284.0nm  
Column: Chiralpak IG-3 90:10

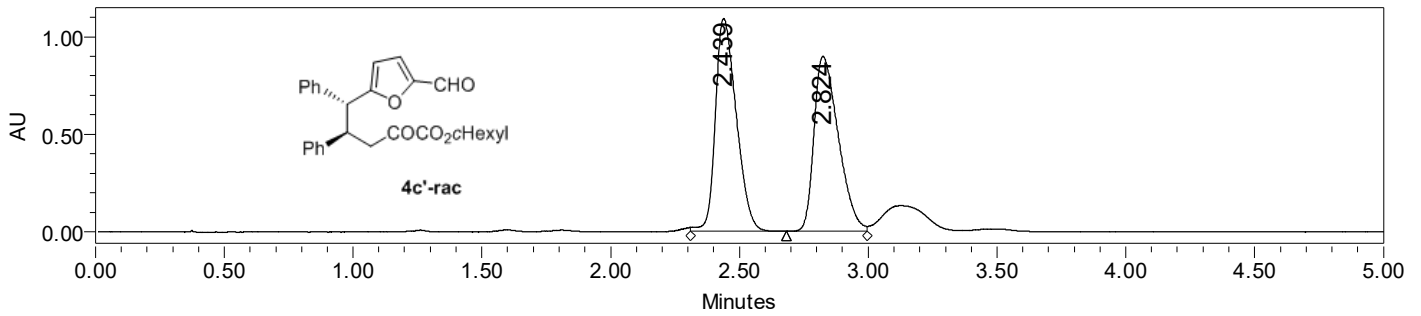**peak information:**

|   | RetTime (min) | Area (μV*s) | Area (%) | Height (μV) |
|---|---------------|-------------|----------|-------------|
| 1 | 2.439         | 6138144     | 51.10    | 1091247     |
| 2 | 2.824         | 5874972     | 48.90    | 896460      |

Sample Name: 4c'-ch Wave Length: 284.0nm  
Column: Chiralpak IG-3 90:10

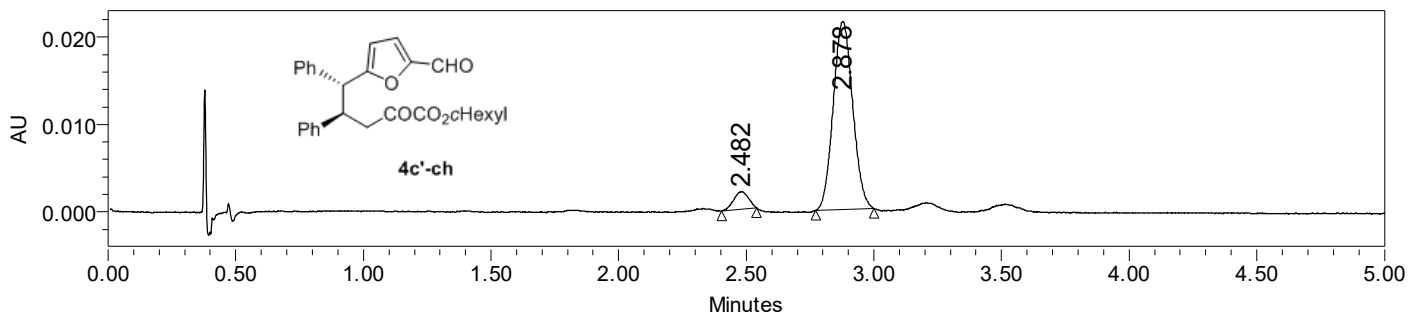**peak information:**

|   | RetTime (min) | Area (μV*s) | Area (%) | Height (μV) |
|---|---------------|-------------|----------|-------------|
| 1 | 2.482         | 8141        | 6.63     | 2010        |
| 2 | 2.878         | 114560      | 93.37    | 21535       |



Sample Name: 4d-rac  
Column: Chiralpak IG-3 90:10

Wave Length: 285.0nm

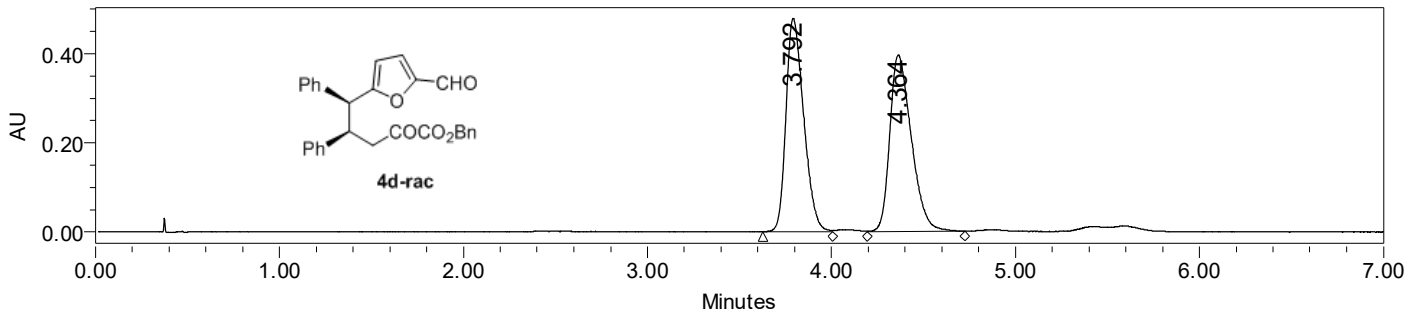

peak information:

|   | RetTime (min) | Area (μV*s) | Area (%) | Height (μV) |
|---|---------------|-------------|----------|-------------|
| 1 | 3.792         | 3213183     | 49.86    | 478290      |
| 2 | 4.364         | 3231159     | 50.14    | 395544      |

Sample Name: 4d-ch  
Column: Chiralpak IG-3 90:10

Wave Length: 285.0nm

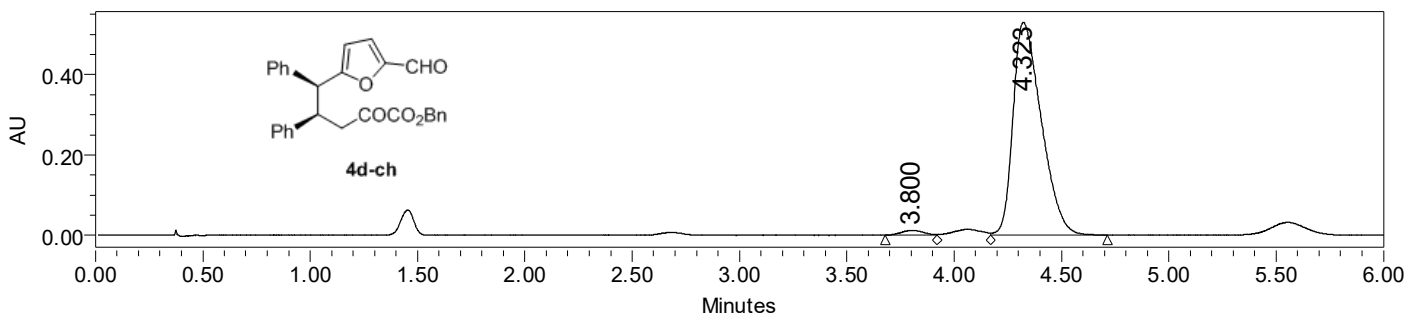

peak information:

|   | RetTime (min) | Area (μV*s) | Area (%) | Height (μV) |
|---|---------------|-------------|----------|-------------|
| 1 | 3.800         | 86467       | 1.76     | 12171       |
| 2 | 4.323         | 4816443     | 98.24    | 528966      |

Sample Name: 4d'-rac  
Column: Chiralpak IG-3 90:10

Wave Length: 284.0nm

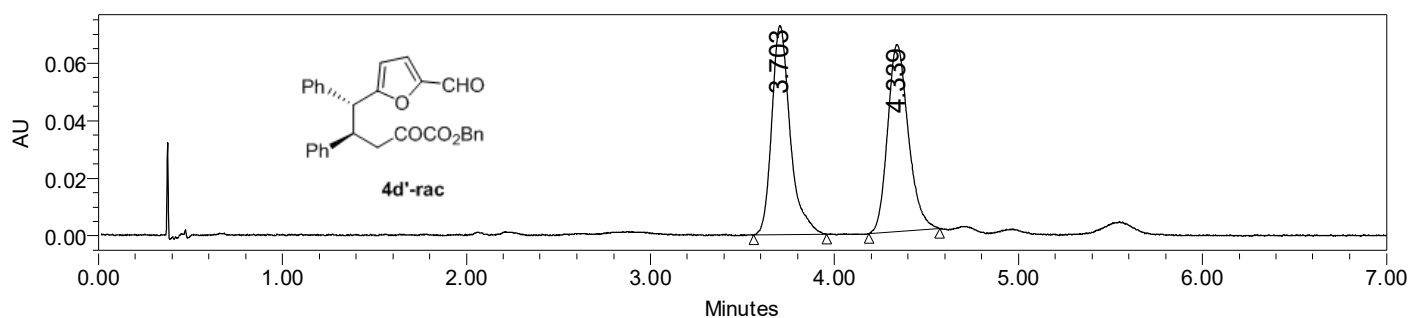

peak information:

|   | RetTime (min) | Area (μV*s) | Area (%) | Height (μV) |
|---|---------------|-------------|----------|-------------|
| 1 | 3.703         | 509114      | 49.89    | 72799       |
| 2 | 4.339         | 511386      | 50.11    | 64988       |

Sample Name: 4d'-ch  
Column: Chiralpak IG-3 90:10

Wave Length: 284.0nm

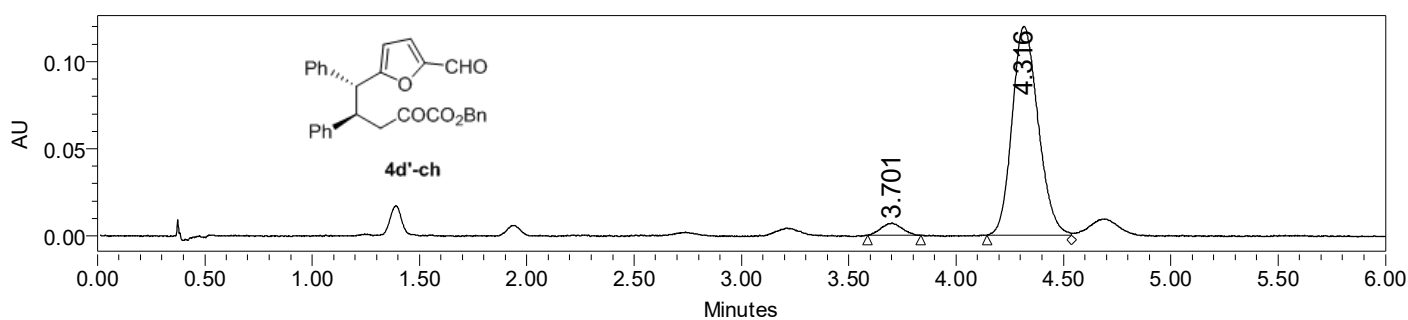

peak information:

|   | RetTime (min) | Area (μV*s) | Area (%) | Height (μV) |
|---|---------------|-------------|----------|-------------|
| 1 | 3.701         | 47216       | 4.47     | 6937        |
| 2 | 4.316         | 1008437     | 95.53    | 119808      |

Sample Name: 4e-rac Wave Length: 284.0nm  
 Column: Chiralpak OD-3 95:5

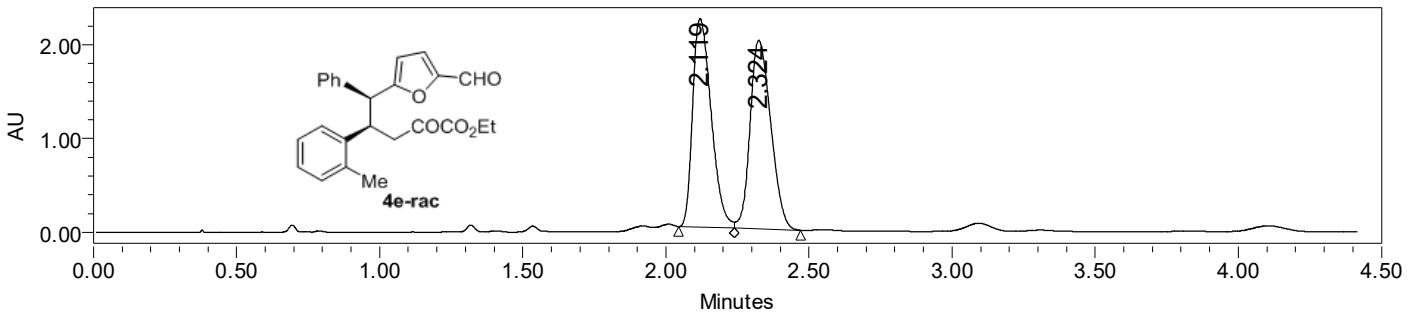

peak information:

|   | RetTime (min) | Area (μV*s) | Area (%) | Height (μV) |
|---|---------------|-------------|----------|-------------|
| 1 | 2.119         | 10052839    | 49.79    | 2227188     |
| 2 | 2.324         | 10135980    | 50.21    | 2012180     |

Sample Name: 4e-ch Wave Length: 284.0nm  
 Column: Chiralpak OD-3 95:5

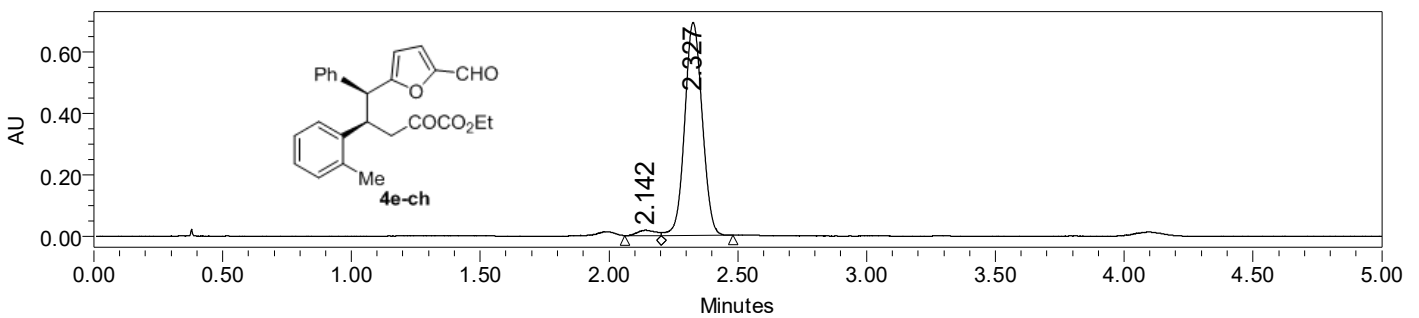

peak information:

|   | RetTime (min) | Area (μV*s) | Area (%) | Height (μV) |
|---|---------------|-------------|----------|-------------|
| 1 | 2.142         | 86312       | 2.55     | 17719       |
| 2 | 2.327         | 3295869     | 97.45    | 693512      |

Sample Name: 4e'-rac  
Column: Chiralpak IG-3 95:5

Wave Length: 282.0nm

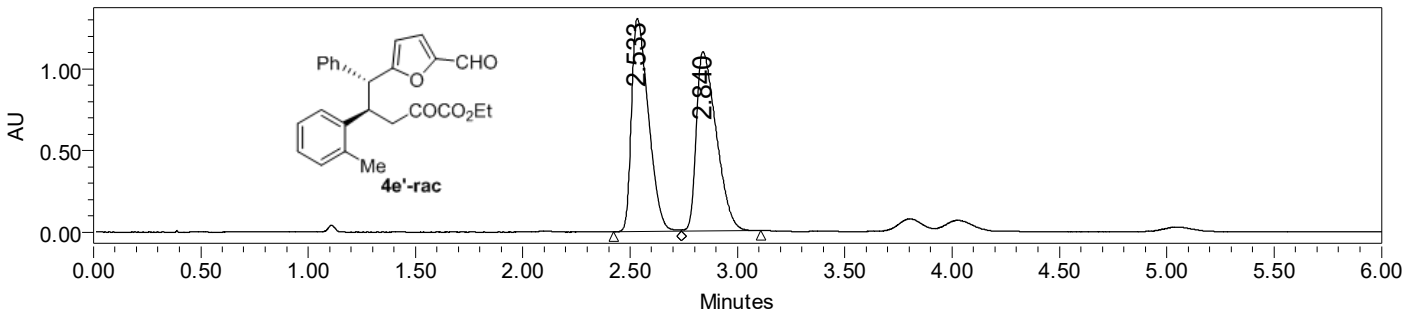**peak information:**

|   | RetTime (min) | Area (μV*s) | Area (%) | Height (μV) |
|---|---------------|-------------|----------|-------------|
| 1 | 2.533         | 7156913     | 50.18    | 1306561     |
| 2 | 2.840         | 7104452     | 49.82    | 1099547     |

Sample Name: 4e'-ch  
Column: Chiralpak IG-3 95:5

Wave Length: 282.0nm

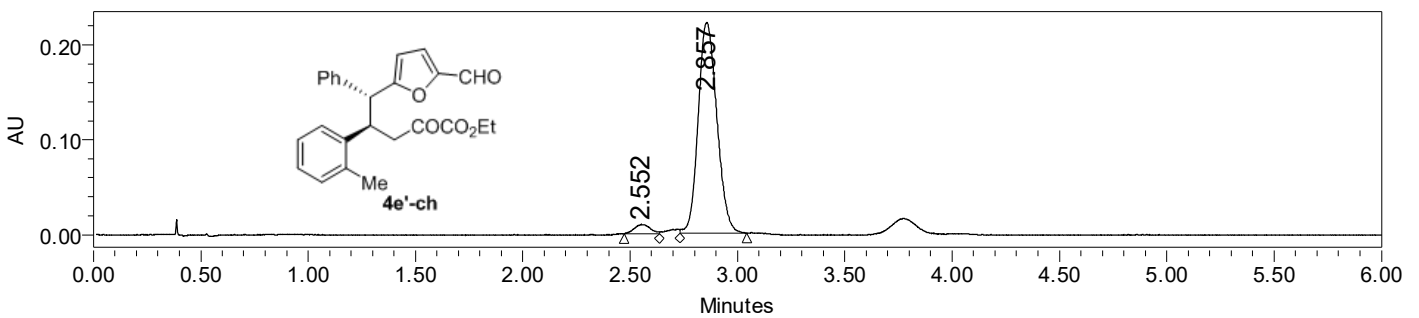**peak information:**

|   | RetTime (min) | Area (μV*s) | Area (%) | Height (μV) |
|---|---------------|-------------|----------|-------------|
| 1 | 2.552         | 49542       | 3.57     | 9636        |
| 2 | 2.857         | 1339007     | 96.43    | 222180      |

Sample Name: 4f-rac  
Column: Chiralpak IG-3 95:5

Wave Length: 284.0nm

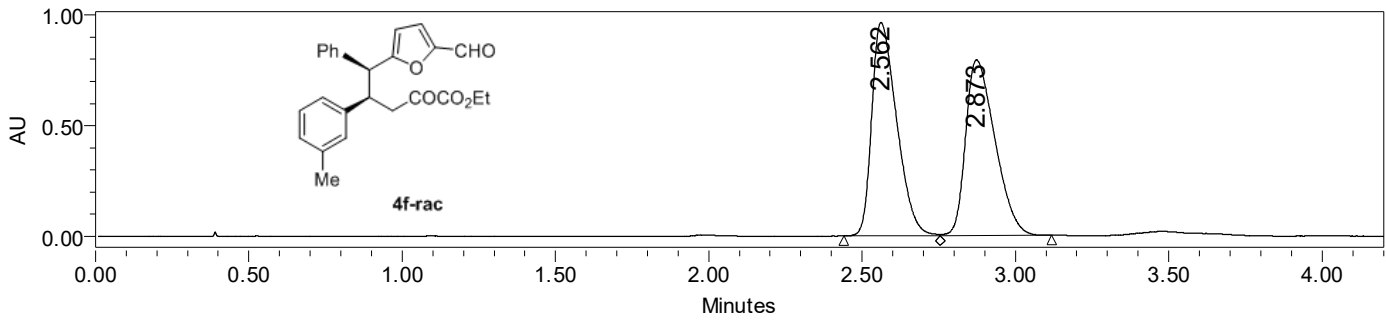**peak information:**

|   | RetTime (min) | Area (μV*s) | Area (%) | Height (μV) |
|---|---------------|-------------|----------|-------------|
| 1 | 2.562         | 5466939     | 50.74    | 964598      |
| 2 | 2.873         | 5306572     | 49.26    | 794728      |

Sample Name: 4f-ch  
Column: Chiralpak IG-3 95:5

Wave Length: 284.0nm

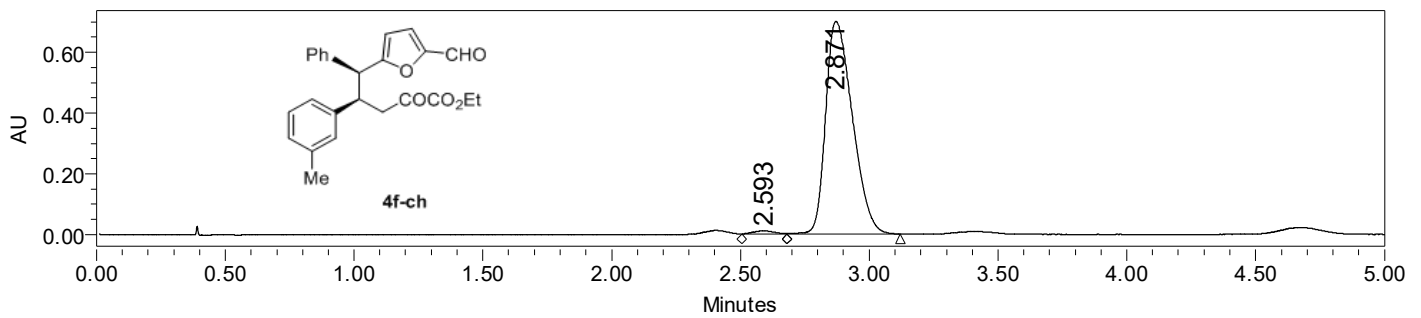**peak information:**

|   | RetTime (min) | Area (μV*s) | Area (%) | Height (μV) |
|---|---------------|-------------|----------|-------------|
| 1 | 2.593         | 65755       | 1.28     | 10910       |
| 2 | 2.871         | 5059283     | 98.72    | 700014      |

Sample Name: 4f'-rac Wave Length: 283.0nm  
 Column: Chiralpak IG-3 95:5

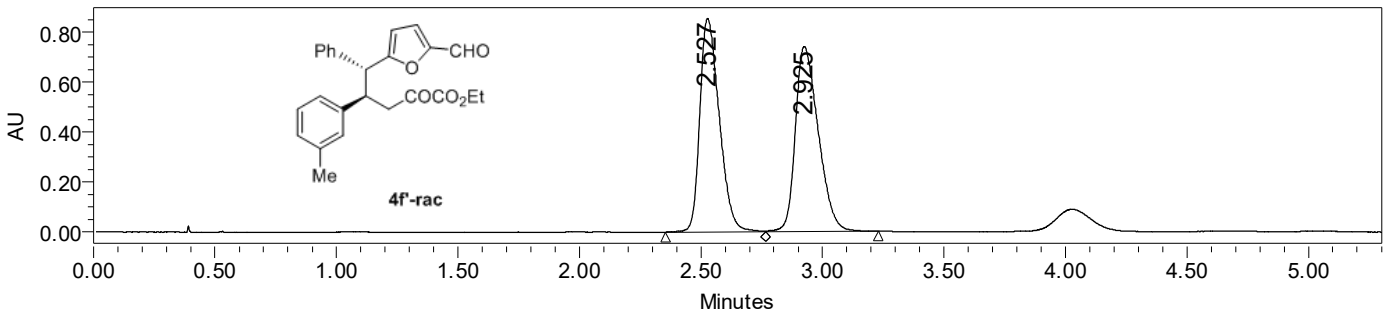

peak information:

|   | RetTime (min) | Area (μV*s) | Area (%) | Height (μV) |
|---|---------------|-------------|----------|-------------|
| 1 | 2.527         | 4737246     | 49.39    | 854272      |
| 2 | 2.925         | 4854196     | 50.61    | 740350      |

Sample Name: 4f'-ch Wave Length: 283.0nm  
 Column: Chiralpak IG-3 95:5

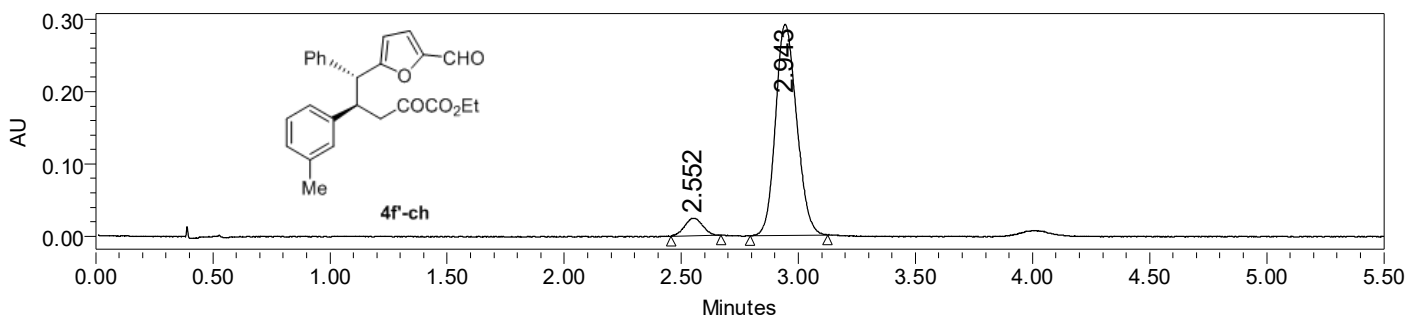

peak information:

|   | RetTime (min) | Area (μV*s) | Area (%) | Height (μV) |
|---|---------------|-------------|----------|-------------|
| 1 | 2.552         | 131516      | 6.67     | 24298       |
| 2 | 2.943         | 1839725     | 93.33    | 291921      |

Sample Name: 4g-rac  
Column: Chiralpak IG-3 95:5

Wave Length: 284.0nm

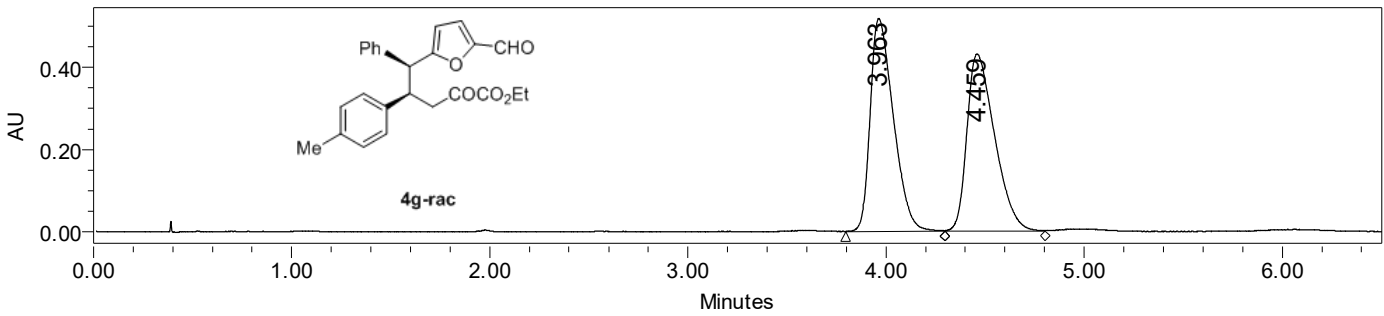

peak information:

|   | RetTime (min) | Area (μV*s) | Area (%) | Height (μV) |
|---|---------------|-------------|----------|-------------|
| 1 | 3.963         | 4227206     | 50.15    | 517934      |
| 2 | 4.459         | 4201546     | 49.85    | 430694      |

Sample Name: 4g-ch  
Column: Chiralpak IG-3 95:5

Wave Length: 284.0nm

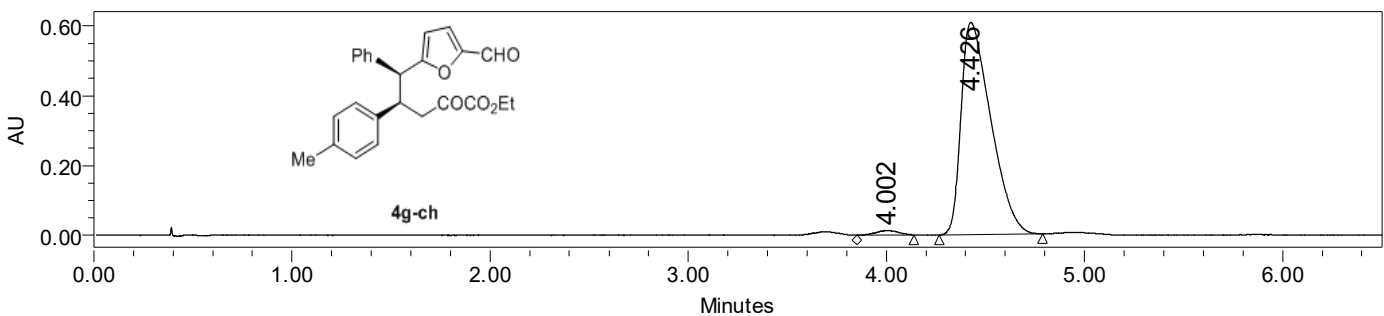

peak information:

|   | RetTime (min) | Area (μV*s) | Area (%) | Height (μV) |
|---|---------------|-------------|----------|-------------|
| 1 | 4.002         | 102141      | 1.58     | 12894       |
| 2 | 4.426         | 6379807     | 98.42    | 608696      |

Sample Name: 4g'-rac  
Column: Chiralpak IG-3 95:5

Wave Length: 283.0nm

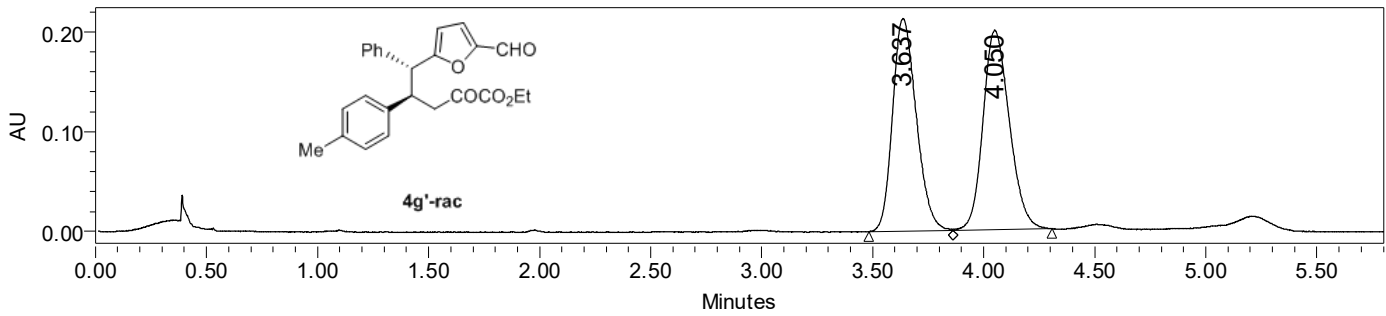**peak information:**

|   | RetTime (min) | Area (μV*s) | Area (%) | Height (μV) |
|---|---------------|-------------|----------|-------------|
| 1 | 3.637         | 1582112     | 48.85    | 213153      |
| 2 | 4.050         | 1656827     | 51.15    | 199739      |

Sample Name: 4g'-ch  
Column: Chiralpak IG-3 95:5

Wave Length: 283.0nm

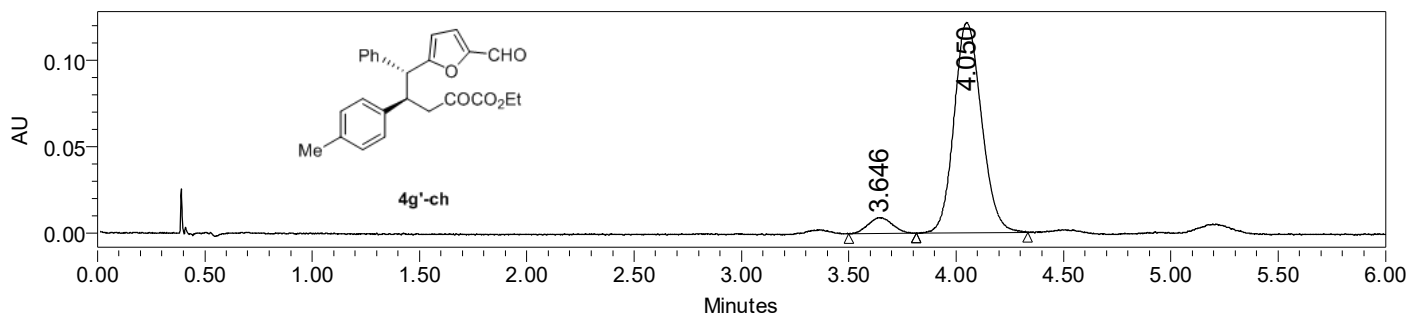**peak information:**

|   | RetTime (min) | Area (μV*s) | Area (%) | Height (μV) |
|---|---------------|-------------|----------|-------------|
| 1 | 3.646         | 74400       | 6.40     | 9292        |
| 2 | 4.050         | 1087914     | 93.60    | 122082      |



Sample Name: 4h-rac  
Column: Chiralpak IG-3 95:5

Wave Length: 283.0nm

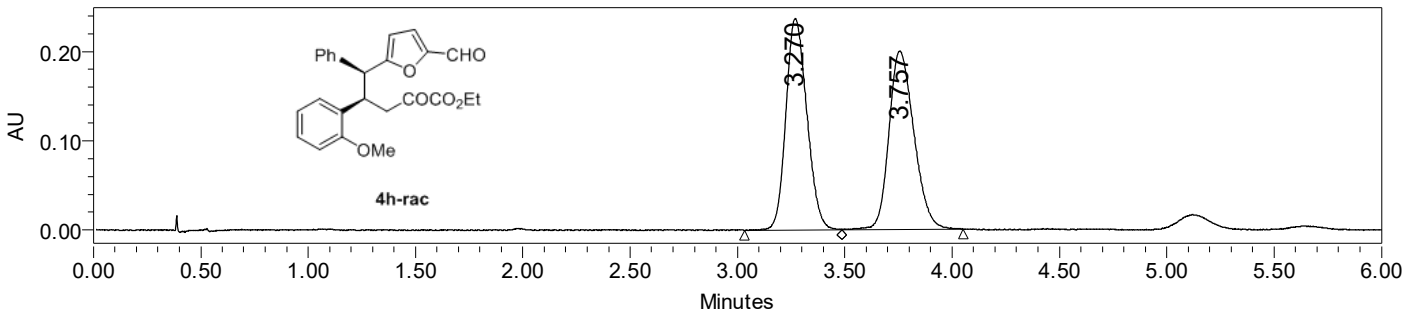

peak information:

|   | RetTime (min) | Area (μV*s) | Area (%) | Height (μV) |
|---|---------------|-------------|----------|-------------|
| 1 | 3.270         | 1620692     | 49.95    | 237378      |
| 2 | 3.757         | 1623989     | 50.05    | 200028      |

Sample Name: 4h-ch  
Column: Chiralpak IG-3 95:5

Wave Length: 283.0nm

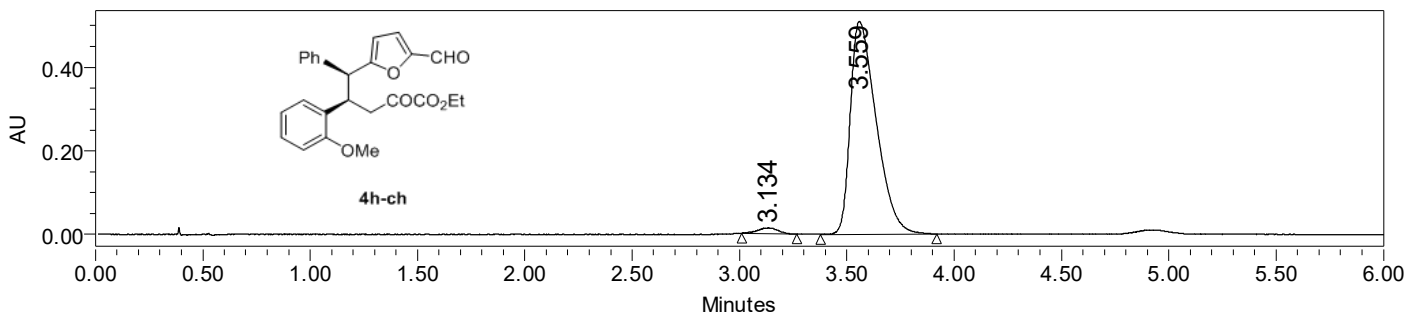

peak information:

|   | RetTime (min) | Area (μV*s) | Area (%) | Height (μV) |
|---|---------------|-------------|----------|-------------|
| 1 | 3.134         | 92481       | 2.11     | 13929       |
| 2 | 3.559         | 4282171     | 97.89    | 509870      |

Sample Name: 4h'-rac  
Column: Chiralpak IG-3 95:5

Wave Length: 283.0nm

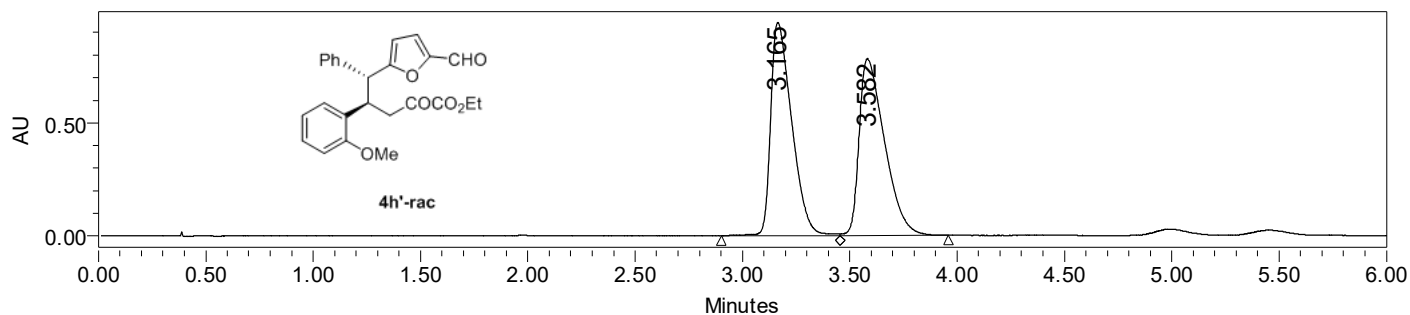

peak information:

|   | RetTime (min) | Area (μV*s) | Area (%) | Height (μV) |
|---|---------------|-------------|----------|-------------|
| 1 | 3.165         | 6451695     | 50.08    | 943056      |
| 2 | 3.582         | 6431394     | 49.92    | 781589      |

Sample Name: 4h'-ch  
Column: Chiralpak IG-3 95:5

Wave Length: 280.0nm

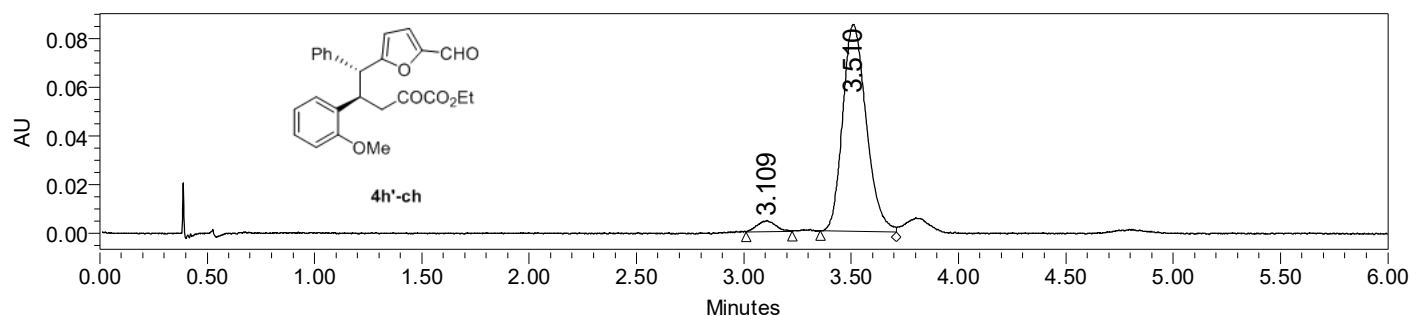

peak information:

|   | RetTime (min) | Area (μV*s) | Area (%) | Height (μV) |
|---|---------------|-------------|----------|-------------|
| 1 | 3.109         | 26653       | 3.94     | 4470        |
| 2 | 3.510         | 649630      | 96.06    | 85127       |

Sample Name: 4i-rac Wave Length: 282.0nm  
 Column: Chiralpak OD-3 95:5

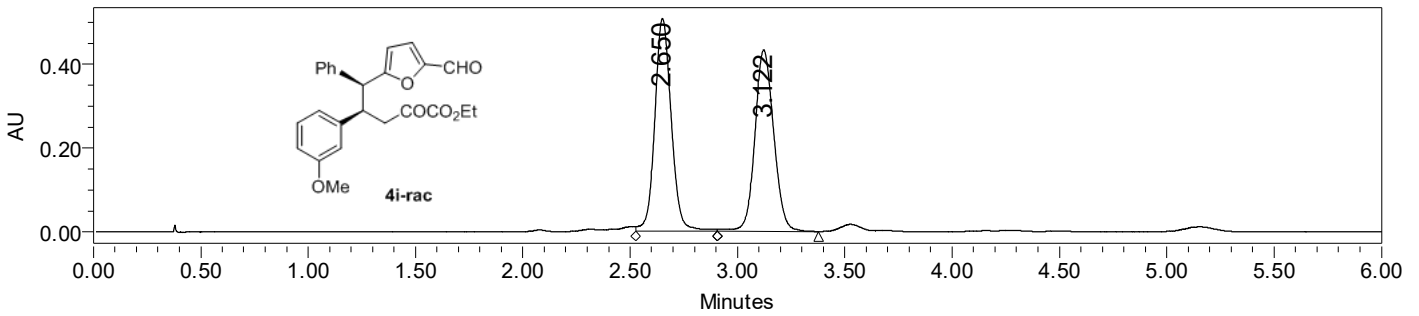

peak information:

|   | RetTime (min) | Area (μV*s) | Area (%) | Height (μV) |
|---|---------------|-------------|----------|-------------|
| 1 | 2.650         | 2740845     | 50.64    | 508475      |
| 2 | 3.122         | 2671303     | 49.36    | 433646      |

Sample Name: 4i-ch Wave Length: 282.0nm  
 Column: Chiralpak OD-3 95:5

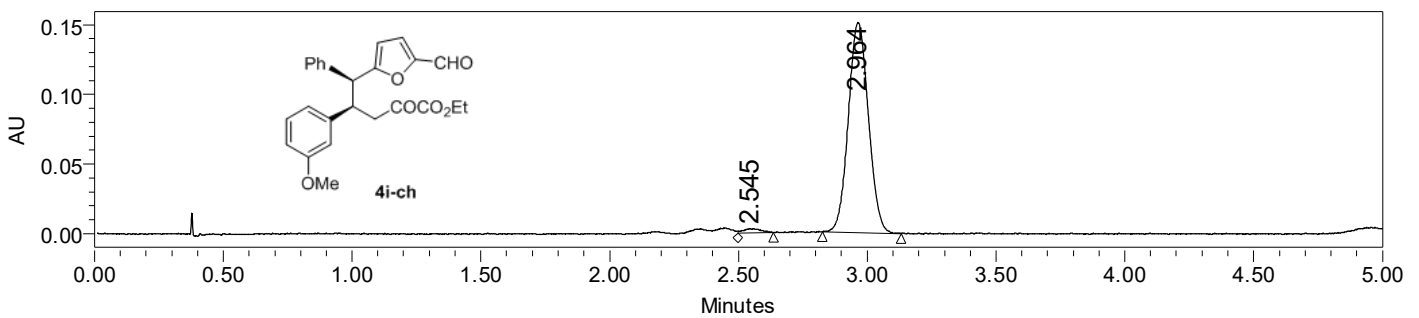

peak information:

|   | RetTime (min) | Area (μV*s) | Area (%) | Height (μV) |
|---|---------------|-------------|----------|-------------|
| 1 | 2.545         | 13768       | 1.65     | 2940        |
| 2 | 2.964         | 819305      | 98.35    | 151020      |

Sample Name: 4i'-rac  
Column: Chiralpak AD-3 95:5

Wave Length: 282.0nm

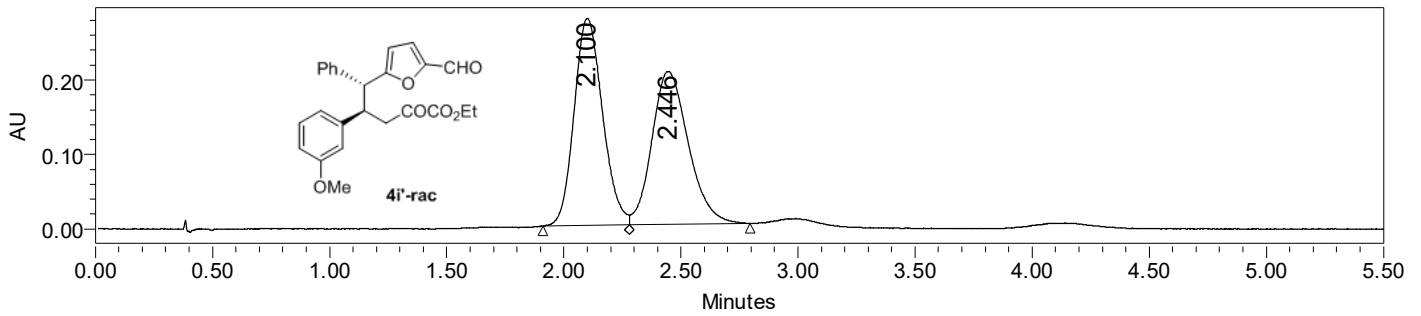**peak information:**

|   | RetTime (min) | Area (μV*s) | Area (%) | Height (μV) |
|---|---------------|-------------|----------|-------------|
| 1 | 2.100         | 2351388     | 51.37    | 277895      |
| 2 | 2.446         | 2225812     | 48.63    | 205435      |

Sample Name: 4i'-ch  
Column: Chiralpak AD-3 95:5

Wave Length: 282.0nm

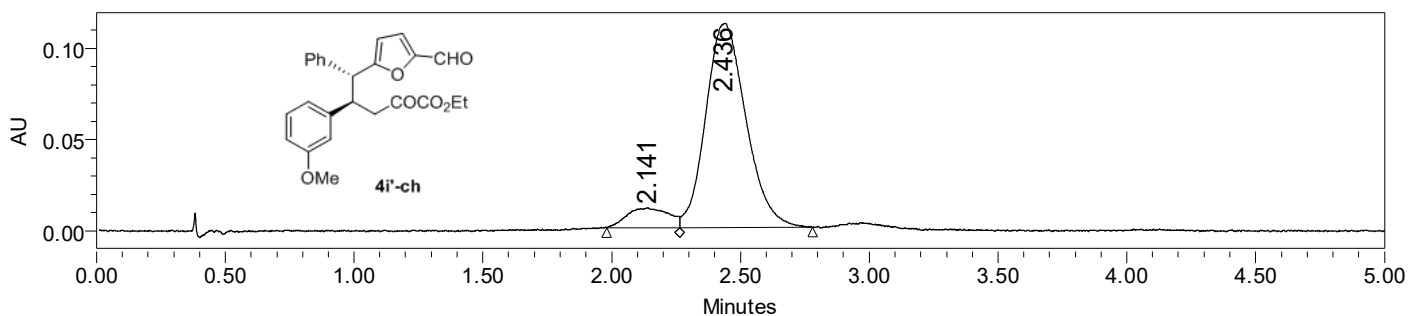**peak information:**

|   | RetTime (min) | Area (μV*s) | Area (%) | Height (μV) |
|---|---------------|-------------|----------|-------------|
| 1 | 2.141         | 122867      | 9.20     | 10727       |
| 2 | 2.436         | 1212954     | 90.80    | 111831      |

Sample Name: 4j-rac  
Column: Chiralpak IG-3 95:5

Wave Length: 283.0nm

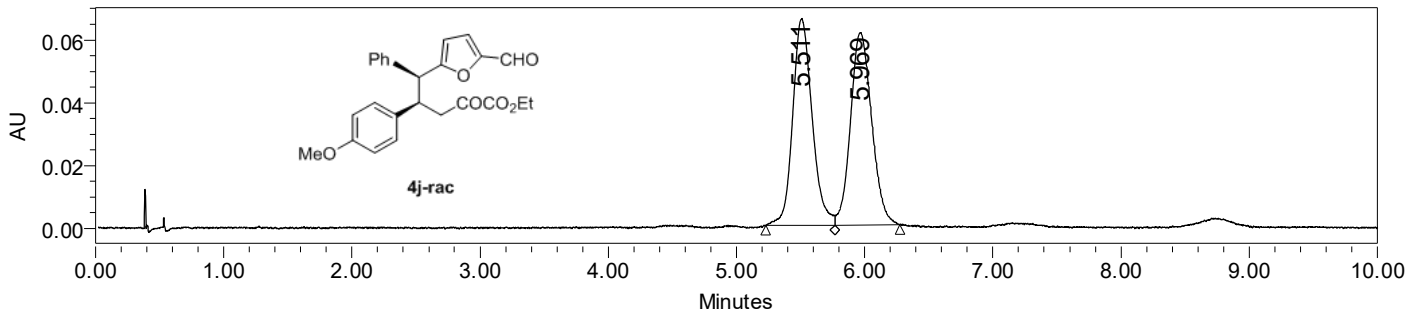

peak information:

|   | RetTime (min) | Area (μV*s) | Area (%) | Height (μV) |
|---|---------------|-------------|----------|-------------|
| 1 | 5.511         | 697983      | 49.87    | 65867       |
| 2 | 5.969         | 701744      | 50.13    | 61236       |

Sample Name: 4j-ch  
Column: Chiralpak IG-3 95:5

Wave Length: 283.0nm

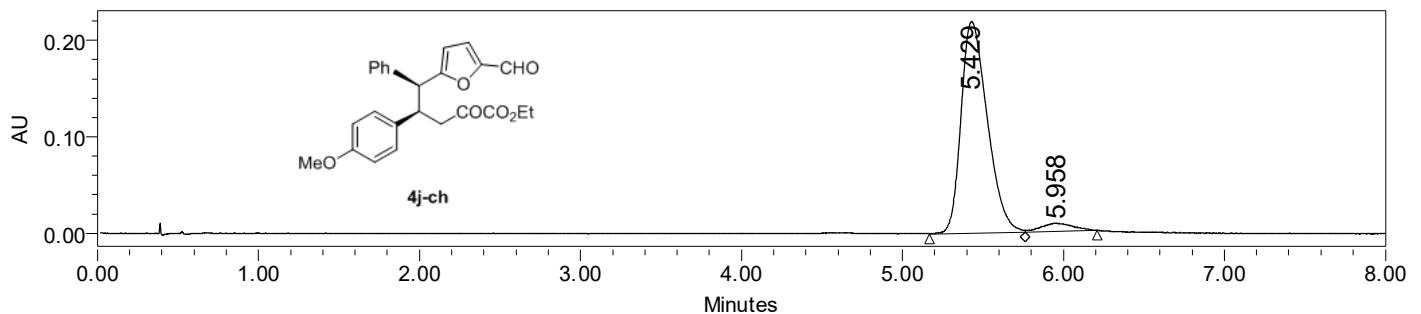

peak information:

|   | RetTime (min) | Area (μV*s) | Area (%) | Height (μV) |
|---|---------------|-------------|----------|-------------|
| 1 | 5.429         | 2487978     | 95.64    | 219237      |
| 2 | 5.958         | 113412      | 4.36     | 8150        |

Sample Name: 4j<sup>1</sup>-rac Wave Length: 283.0nm  
Column: Chiralpak AD-3 95:5

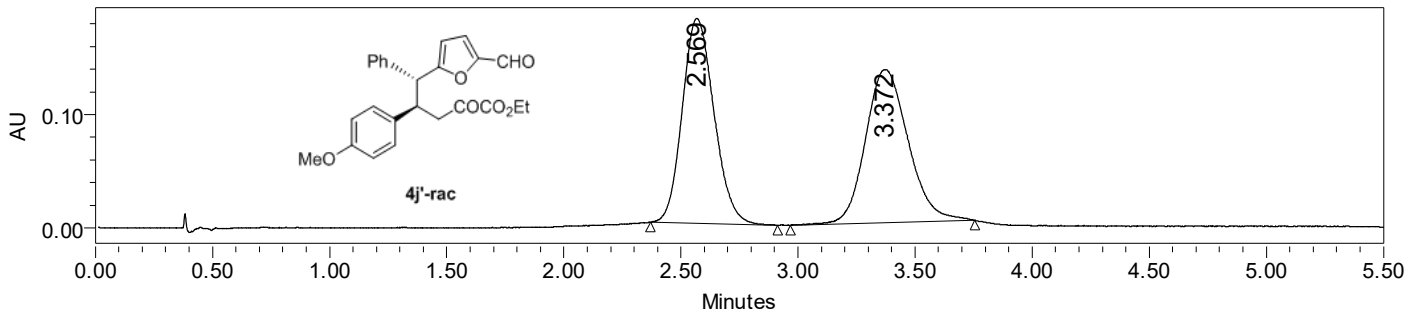**peak information:**

|   | RetTime (min) | Area (μV*s) | Area (%) | Height (μV) |
|---|---------------|-------------|----------|-------------|
| 1 | 2.569         | 1703948     | 49.88    | 180451      |
| 2 | 3.372         | 1712409     | 50.12    | 134985      |

Sample Name: 4j<sup>1</sup>-ch Wave Length: 283.0nm  
Column: Chiralpak AD-3 95:5

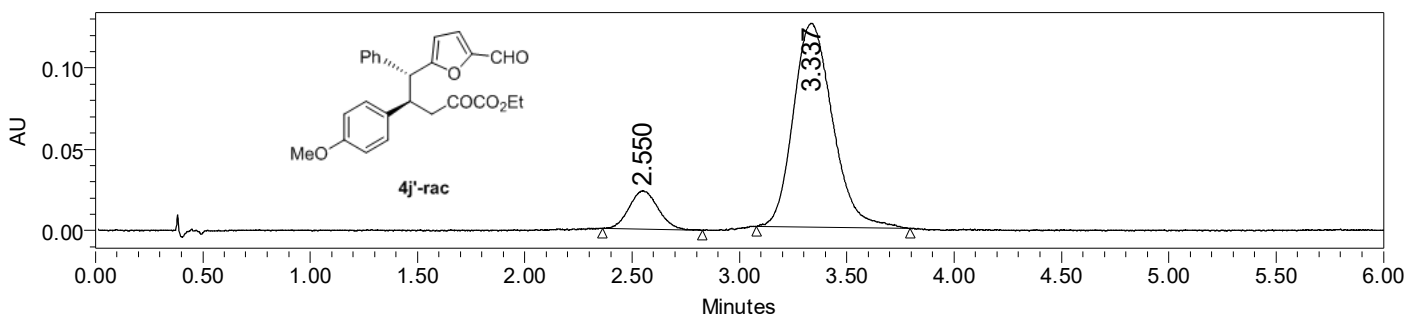**peak information:**

|   | RetTime (min) | Area (μV*s) | Area (%) | Height (μV) |
|---|---------------|-------------|----------|-------------|
| 1 | 2.550         | 224098      | 12.34    | 23649       |
| 2 | 3.337         | 1591843     | 87.66    | 125237      |

Sample Name: 4k-rac  
Column: Chiralpak IG-3 95:5

Wave Length: 283.0nm

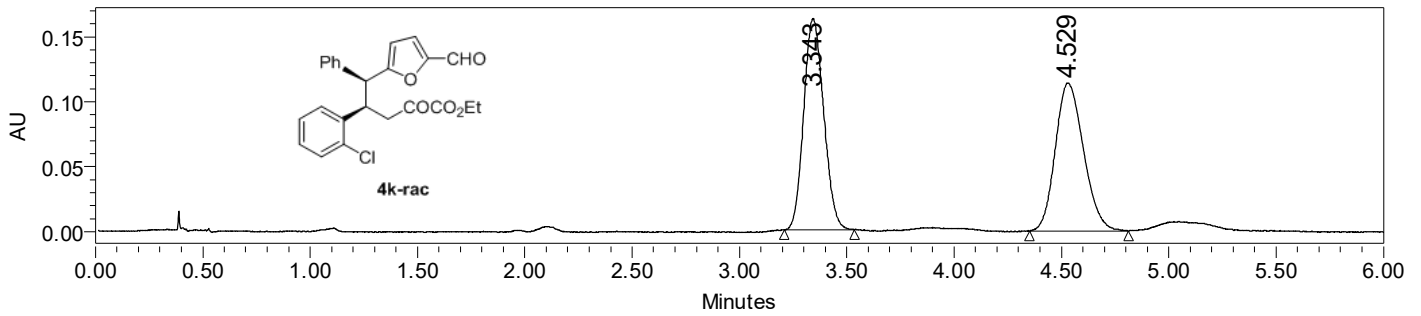**peak information:**

|   | RetTime (min) | Area (μV*s) | Area (%) | Height (μV) |
|---|---------------|-------------|----------|-------------|
| 1 | 3.343         | 1053773     | 50.26    | 162765      |
| 2 | 4.529         | 1042786     | 49.74    | 113824      |

Sample Name: 4k-ch  
Column: Chiralpak IG-3 95:5

Wave Length: 283.0nm

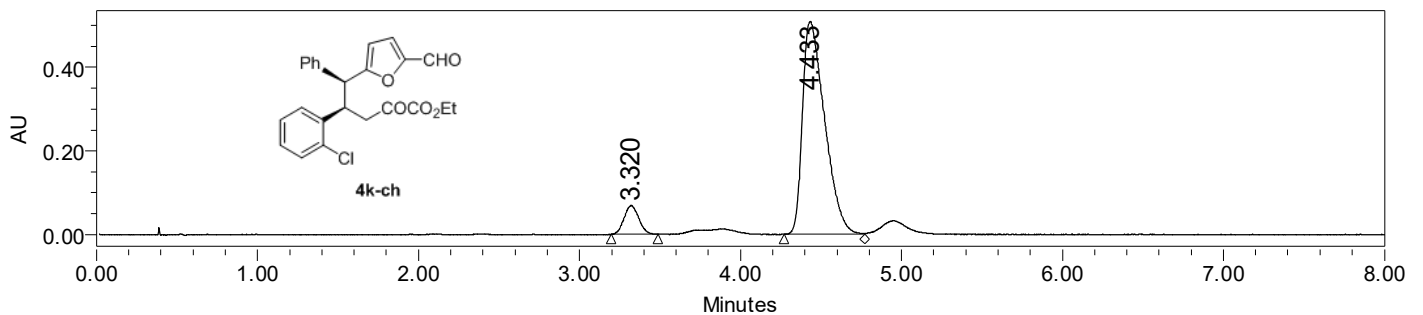**peak information:**

|   | RetTime (min) | Area (μV*s) | Area (%) | Height (μV) |
|---|---------------|-------------|----------|-------------|
| 1 | 3.320         | 438734      | 8.29     | 68672       |
| 2 | 4.433         | 4852130     | 91.71    | 508943      |

Sample Name: 4k'-rac  
Column: Chiralpak IG-3 95:5

Wave Length: 282.0nm

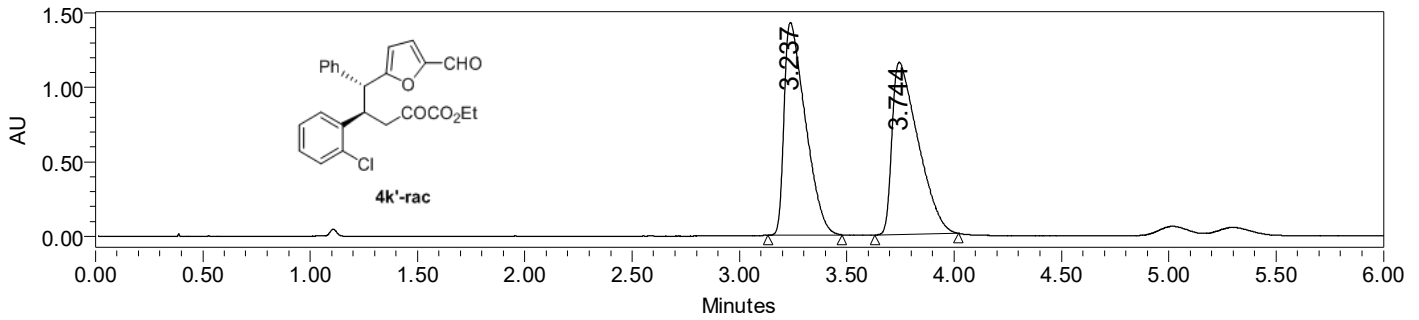**peak information:**

|   | RetTime (min) | Area (μV*s) | Area (%) | Height (μV) |
|---|---------------|-------------|----------|-------------|
| 1 | 3.237         | 9854563     | 50.22    | 1430712     |
| 2 | 3.744         | 9769861     | 49.78    | 1157208     |

Sample Name: 4k'-ch  
Column: Chiralpak IG-3 95:5

Wave Length: 282.0nm

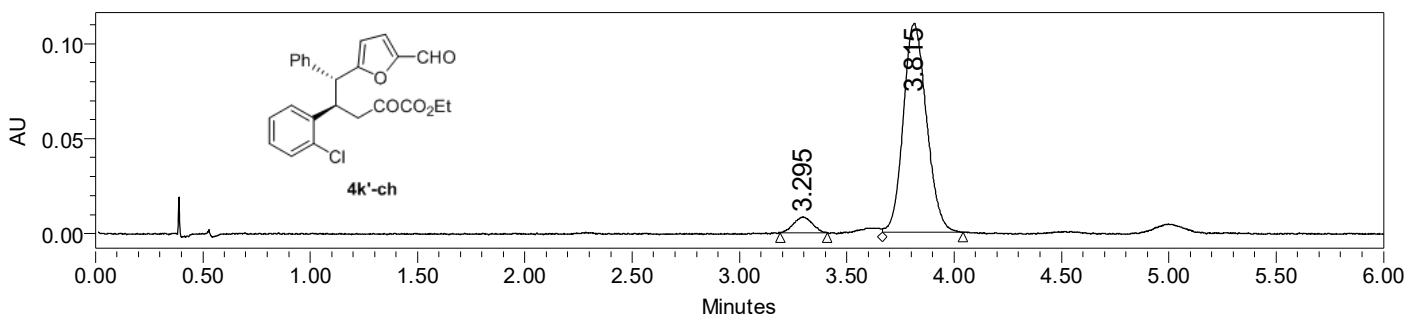**peak information:**

|   | RetTime (min) | Area (μV*s) | Area (%) | Height (μV) |
|---|---------------|-------------|----------|-------------|
| 1 | 3.295         | 51103       | 5.83     | 8325        |
| 2 | 3.815         | 824897      | 94.17    | 109968      |



Sample Name: 4I-rac  
Column: Chiralpak IG-3 95:5

Wave Length: 283.0nm

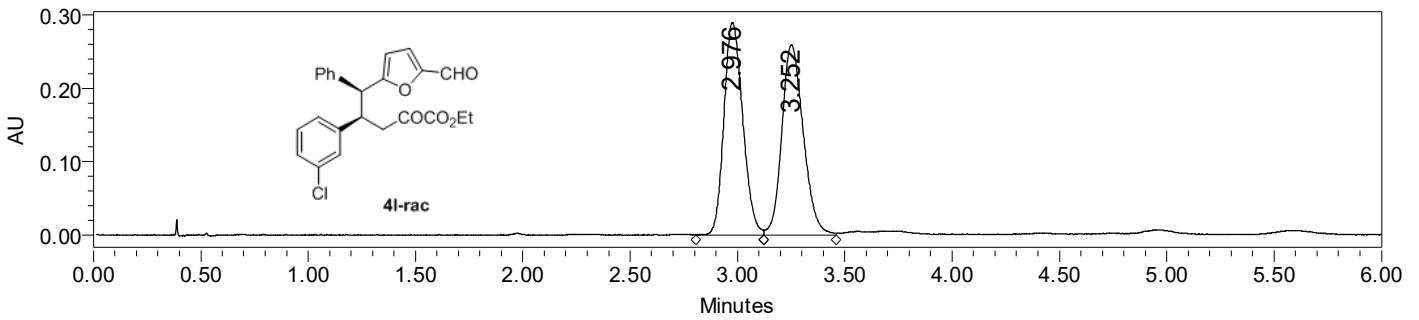**peak information:**

|   | RetTime (min) | Area (μV*s) | Area (%) | Height (μV) |
|---|---------------|-------------|----------|-------------|
| 1 | 2.976         | 1758171     | 49.34    | 290022      |
| 2 | 3.252         | 1805331     | 50.66    | 259409      |

Sample Name: 4I-ch  
Column: Chiralpak IG-3 95:5

Wave Length: 283.0nm

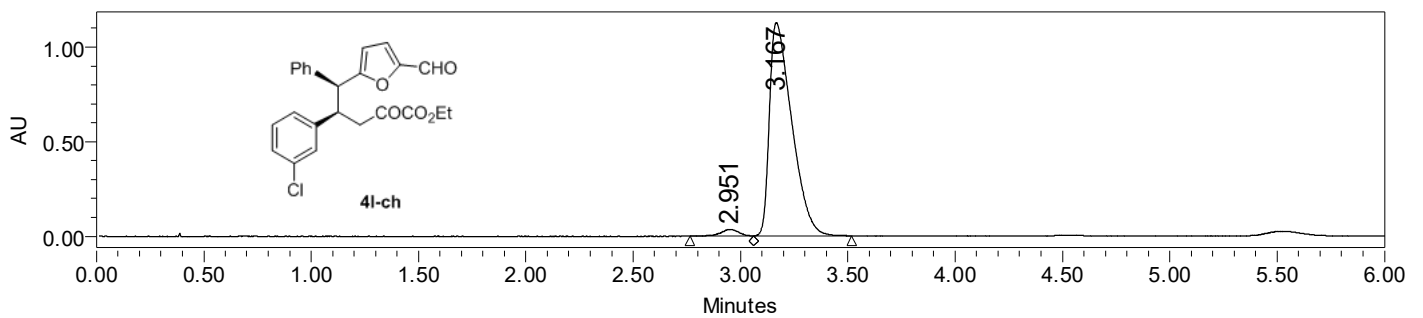**peak information:**

|   | RetTime (min) | Area (μV*s) | Area (%) | Height (μV) |
|---|---------------|-------------|----------|-------------|
| 1 | 2.951         | 210273      | 2.50     | 34804       |
| 2 | 3.167         | 8188978     | 97.50    | 1127457     |

Sample Name: 4l'-rac  
Column: Chiralpak IG-3 95:5

Wave Length: 282.0nm

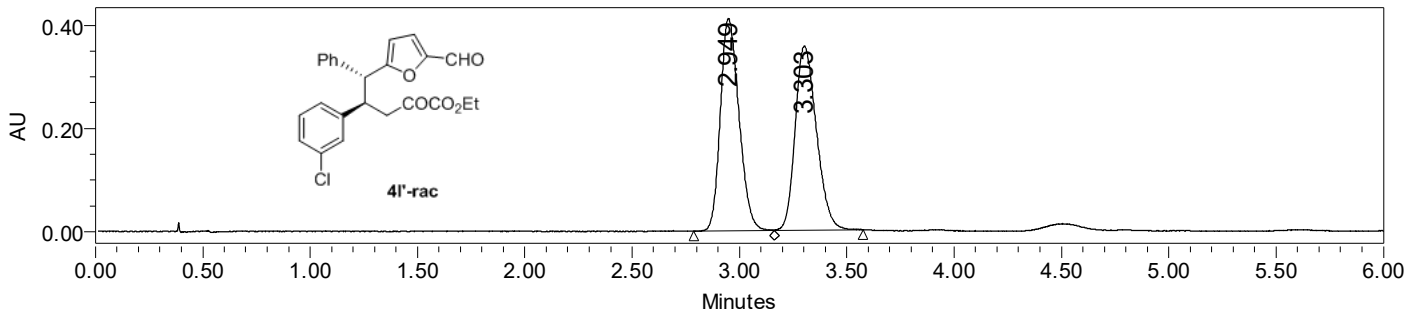**peak information:**

|   | RetTime (min) | Area (μV*s) | Area (%) | Height (μV) |
|---|---------------|-------------|----------|-------------|
| 1 | 2.949         | 2481771     | 50.19    | 412092      |
| 2 | 3.303         | 2462555     | 49.81    | 357424      |

Sample Name: 4l'-ch  
Column: Chiralpak IG-3 95:5

Wave Length: 282.0nm

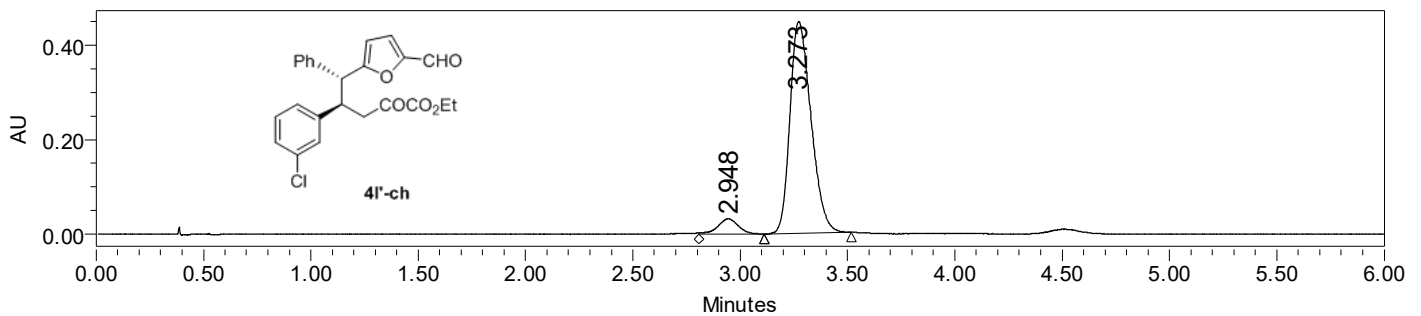**peak information:**

|   | RetTime (min) | Area (μV*s) | Area (%) | Height (μV) |
|---|---------------|-------------|----------|-------------|
| 1 | 2.948         | 218763      | 6.67     | 32207       |
| 2 | 3.273         | 3062844     | 93.33    | 448347      |

Sample Name: 4m-rac  
Column: Chiralpak IG-3 95:5

Wave Length: 283.0nm

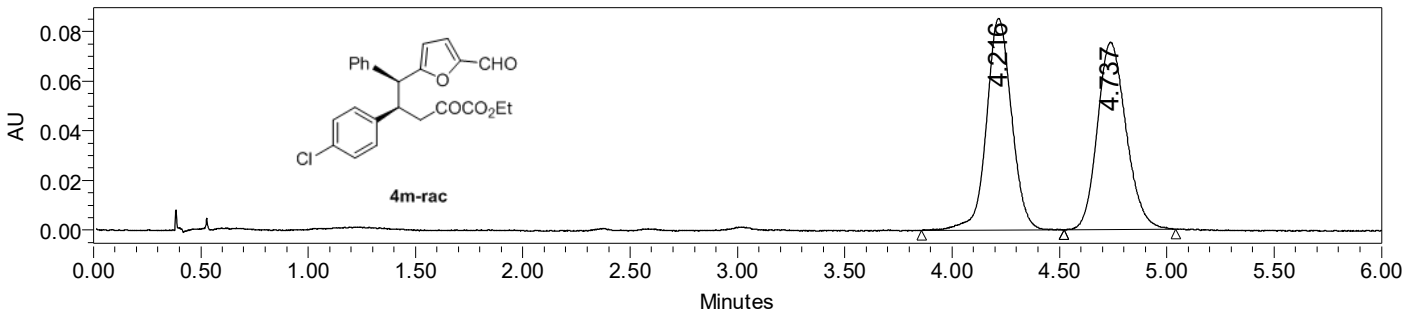

peak information:

|   | RetTime (min) | Area (μV*s) | Area (%) | Height (μV) |
|---|---------------|-------------|----------|-------------|
| 1 | 4.216         | 697579      | 49.84    | 85275       |
| 2 | 4.737         | 702069      | 50.16    | 75439       |

Sample Name: 4m-ch  
Column: Chiralpak IG-3 95:5

Wave Length: 283.0nm

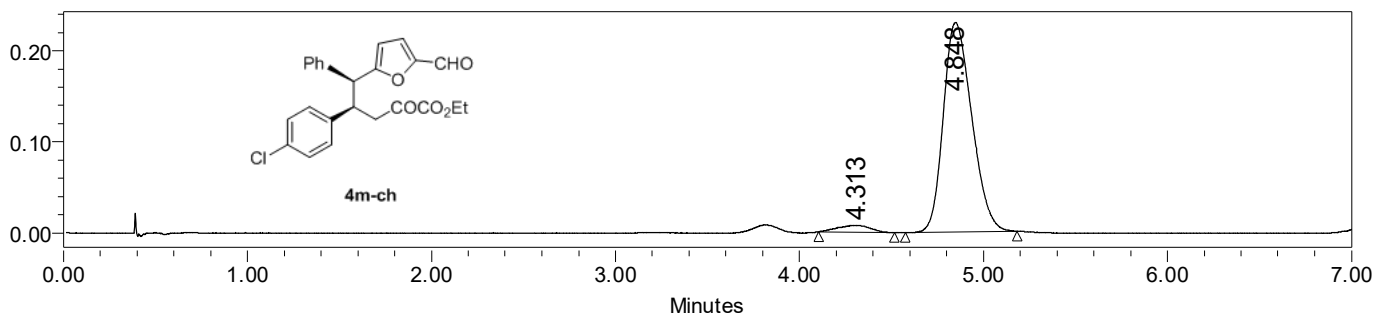

peak information:

|   | RetTime (min) | Area (μV*s) | Area (%) | Height (μV) |
|---|---------------|-------------|----------|-------------|
| 1 | 4.313         | 94804       | 3.67     | 7564        |
| 2 | 4.848         | 2488402     | 96.33    | 230219      |

Sample Name: 4m'-rac  
Column: Chiralpak IG-3 95:5

Wave Length: 282.0nm

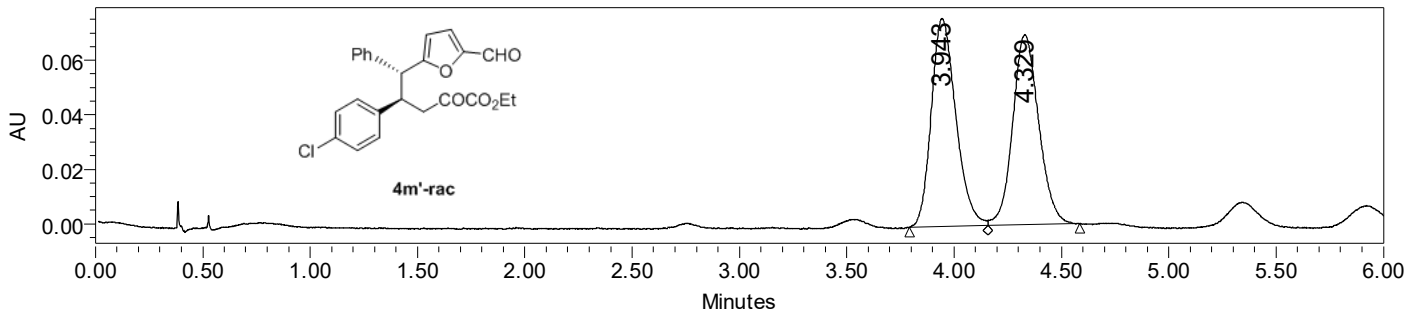

peak information:

|   | RetTime (min) | Area (μV*s) | Area (%) | Height (μV) |
|---|---------------|-------------|----------|-------------|
| 1 | 3.943         | 607001      | 50.85    | 76410       |
| 2 | 4.329         | 586634      | 49.15    | 69757       |

Sample Name: 4m'-ch  
Column: Chiralpak IG-3 95:5

Wave Length: 282.0nm

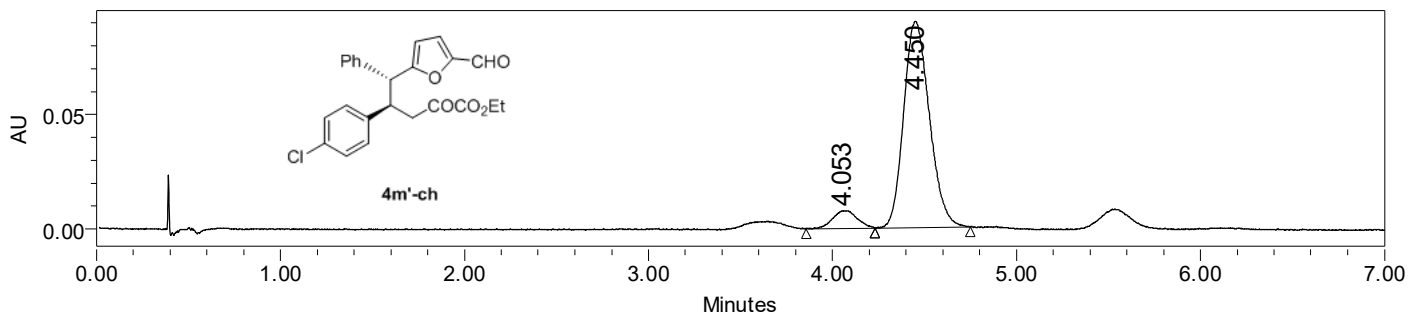

peak information:

|   | RetTime (min) | Area (μV*s) | Area (%) | Height (μV) |
|---|---------------|-------------|----------|-------------|
| 1 | 4.053         | 74648       | 7.87     | 7871        |
| 2 | 4.450         | 874347      | 92.13    | 90103       |

Sample Name: 4n-rac  
Column: Chiralpak IG-3 95:5

Wave Length: 283.0nm

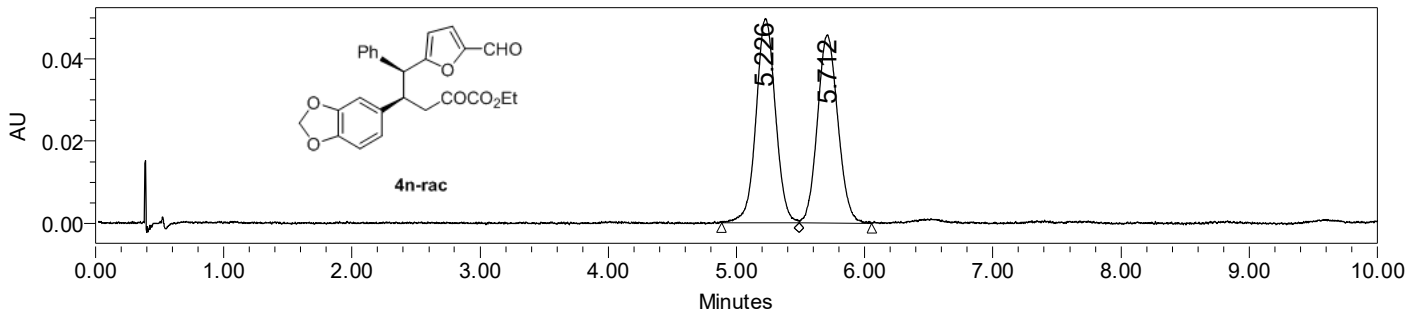**peak information:**

|   | RetTime (min) | Area (μV*s) | Area (%) | Height (μV) |
|---|---------------|-------------|----------|-------------|
| 1 | 5.226         | 524475      | 50.74    | 49784       |
| 2 | 5.712         | 509128      | 49.26    | 45811       |

Sample Name: 4n-ch  
Column: Chiralpak IG-3 95:5

Wave Length: 283.0nm

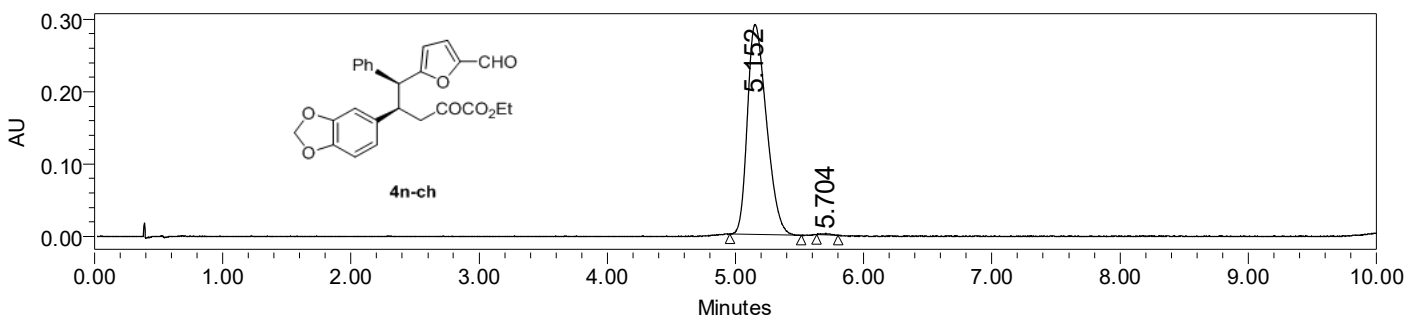**peak information:**

|   | RetTime (min) | Area (μV*s) | Area (%) | Height (μV) |
|---|---------------|-------------|----------|-------------|
| 1 | 5.152         | 3011138     | 99.69    | 290823      |
| 2 | 5.704         | 9273        | 0.31     | 1711        |

Sample Name: 4n'-rac  
Column: Chiralpak AD-3 95:5

Wave Length: 283.7nm

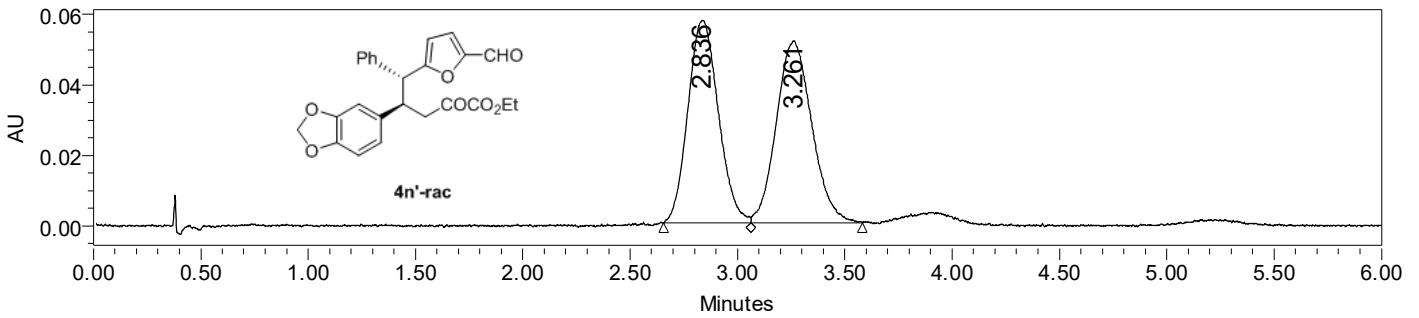

peak information:

|   | RetTime (min) | Area (μV*s) | Area (%) | Height (μV) |
|---|---------------|-------------|----------|-------------|
| 1 | 2.836         | 568627      | 48.94    | 57476       |
| 2 | 3.261         | 593359      | 51.06    | 51654       |

Sample Name: 4n'-ch  
Column: Chiralpak AD-3 95:5

Wave Length: 285.0nm

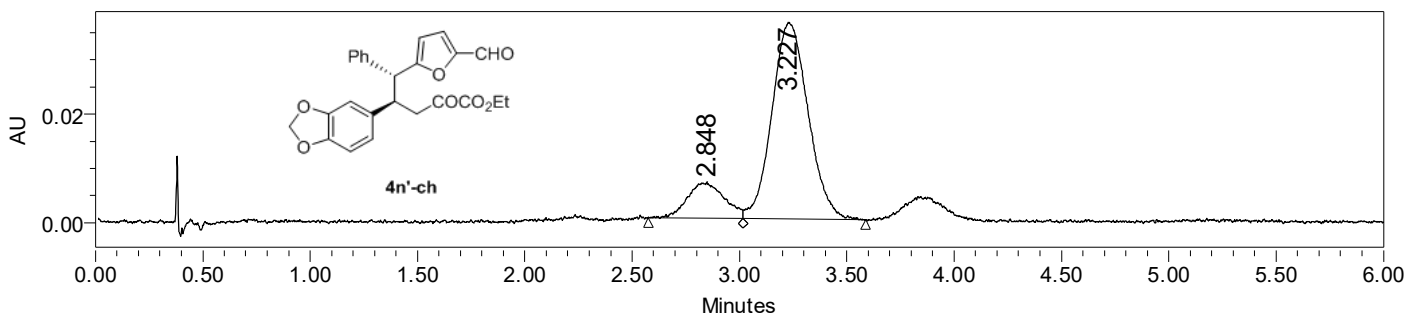

peak information:

|   | RetTime (min) | Area (μV*s) | Area (%) | Height (μV) |
|---|---------------|-------------|----------|-------------|
| 1 | 2.848         | 78705       | 15.64    | 6640        |
| 2 | 3.227         | 424679      | 84.36    | 36167       |

Sample Name: 4o-rac Wave Length: 283.0nm  
Column: Chiralpak AD-3 95:5

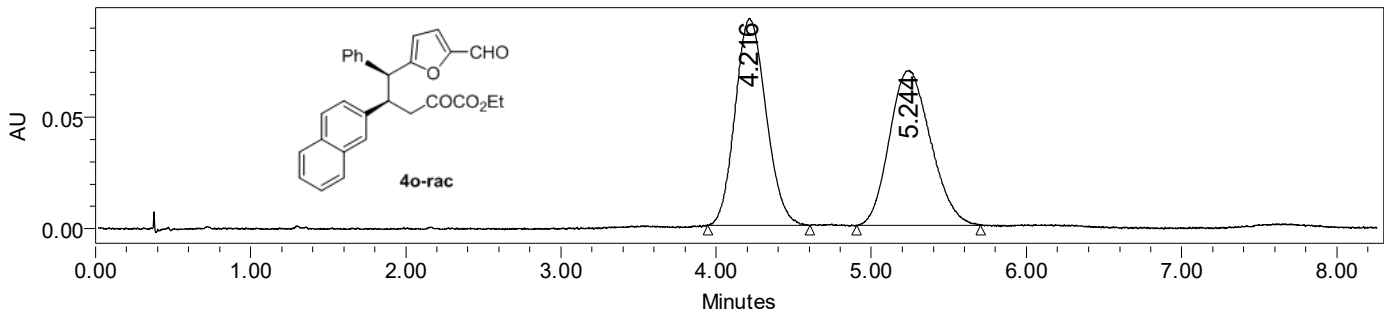**peak information:**

|   | RetTime (min) | Area (μV*s) | Area (%) | Height (μV) |
|---|---------------|-------------|----------|-------------|
| 1 | 4.216         | 1285904     | 50.09    | 92853       |
| 2 | 5.244         | 1281116     | 49.91    | 69440       |

Sample Name: 4o-ch Wave Length: 222.0nm  
Column: Chiralpak AD-3 95:5

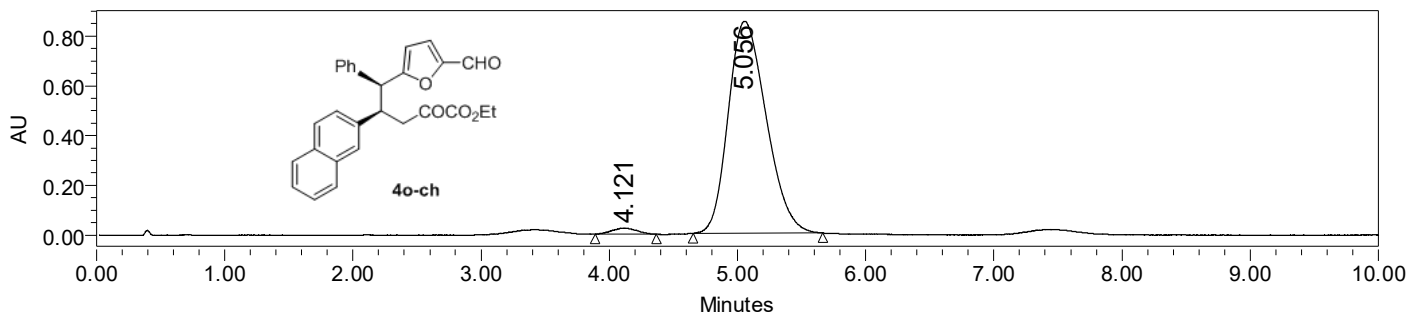**peak information:**

|   | RetTime (min) | Area (μV*s) | Area (%) | Height (μV) |
|---|---------------|-------------|----------|-------------|
| 1 | 4.121         | 328906      | 1.84     | 23834       |
| 2 | 5.056         | 17557647    | 98.16    | 851667      |

Sample Name: 4o'-rac  
Column: Chiralpak AD-3 95:5

Wave Length: 222.0nm

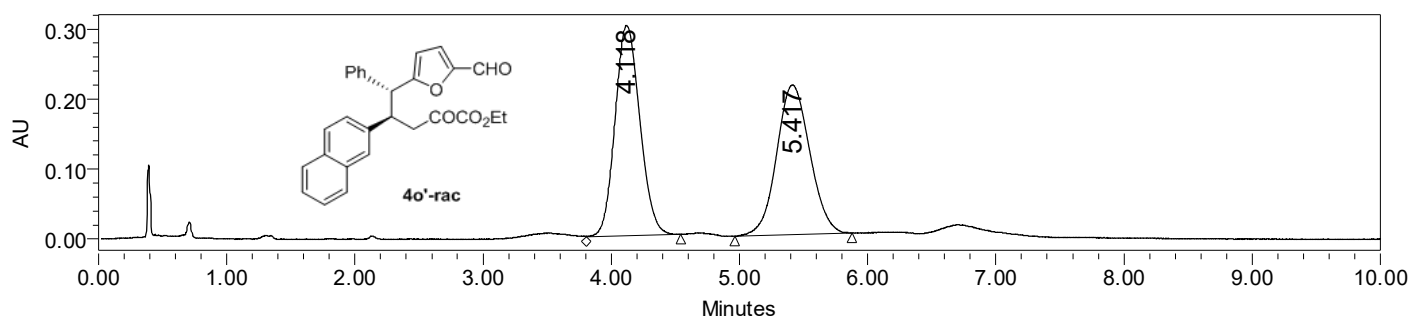**peak information:**

|   | RetTime (min) | Area (μV*s) | Area (%) | Height (μV) |
|---|---------------|-------------|----------|-------------|
| 1 | 4.118         | 4040379     | 51.15    | 300614      |
| 2 | 5.417         | 3857978     | 48.85    | 213998      |

Sample Name: 4o'-ch  
Column: Chiralpak AD-3 95:5

Wave Length: 222.0nm

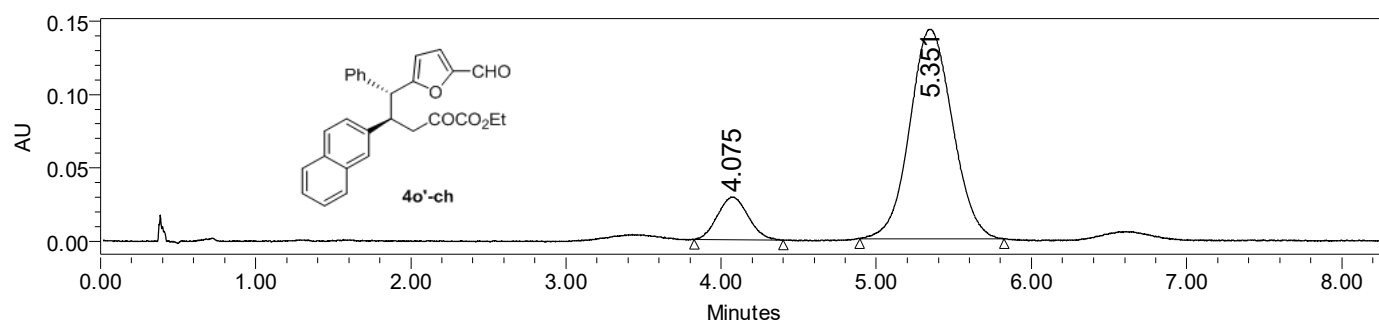**peak information:**

|   | RetTime (min) | Area (μV*s) | Area (%) | Height (μV) |
|---|---------------|-------------|----------|-------------|
| 1 | 4.075         | 404589      | 12.92    | 29336       |
| 2 | 5.351         | 2727439     | 87.08    | 142928      |



Sample Name: 4p-rac  
Column: Chiralpak IG-3 95:5

Wave Length: 283.0nm

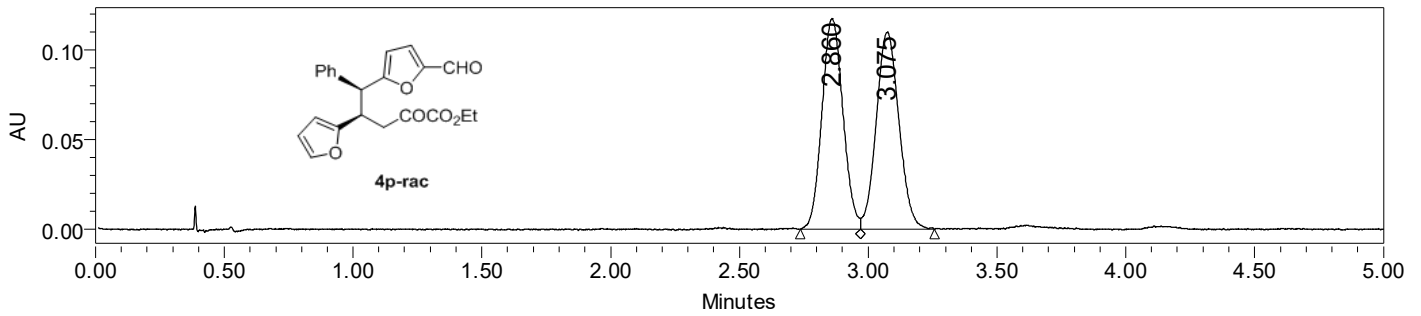**peak information:**

|   | RetTime (min) | Area (μV*s) | Area (%) | Height (μV) |
|---|---------------|-------------|----------|-------------|
| 1 | 2.860         | 666853      | 49.72    | 117460      |
| 2 | 3.075         | 674260      | 50.28    | 109856      |

Sample Name: 4p-ch  
Column: Chiralpak IG-3 95:5

Wave Length: 283.0nm

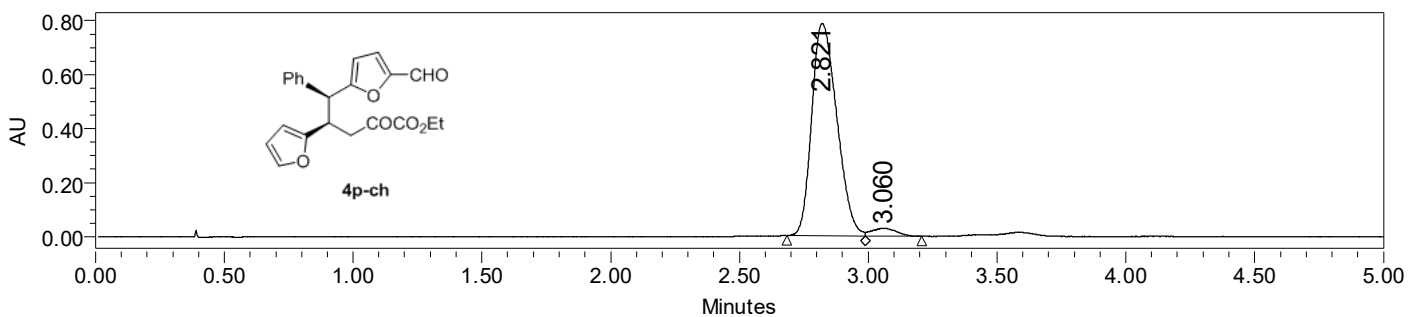**peak information:**

|   | RetTime (min) | Area (μV*s) | Area (%) | Height (μV) |
|---|---------------|-------------|----------|-------------|
| 1 | 2.821         | 5329055     | 96.44    | 785563      |
| 2 | 3.060         | 196579      | 3.56     | 28445       |

Sample Name: 4p'-rac Wave Length: 282.0nm  
Column: Chiralpak IG-3 95:5

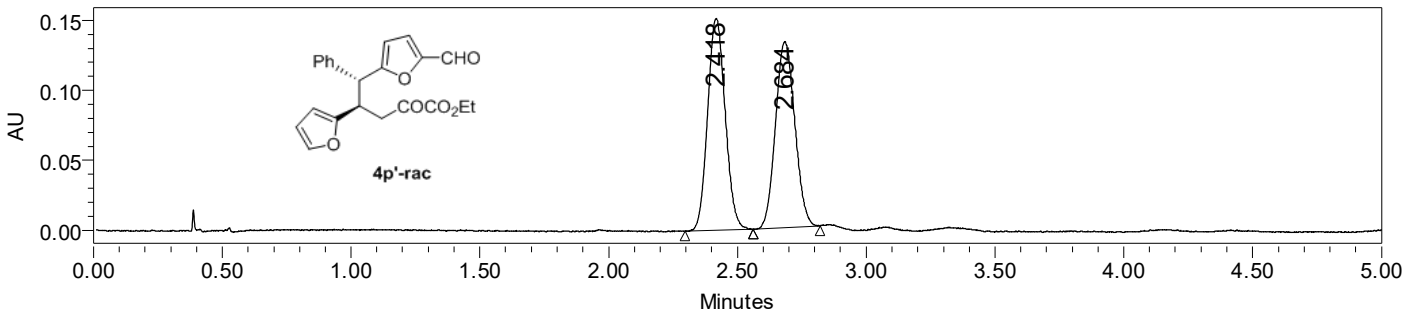**peak information:**

|   | RetTime (min) | Area (μV*s) | Area (%) | Height (μV) |
|---|---------------|-------------|----------|-------------|
| 1 | 2.418         | 717482      | 50.85    | 151240      |
| 2 | 2.684         | 693553      | 49.15    | 132675      |

Sample Name: 4p'-ch Wave Length: 282.0nm  
Column: Chiralpak IG-3 95:5

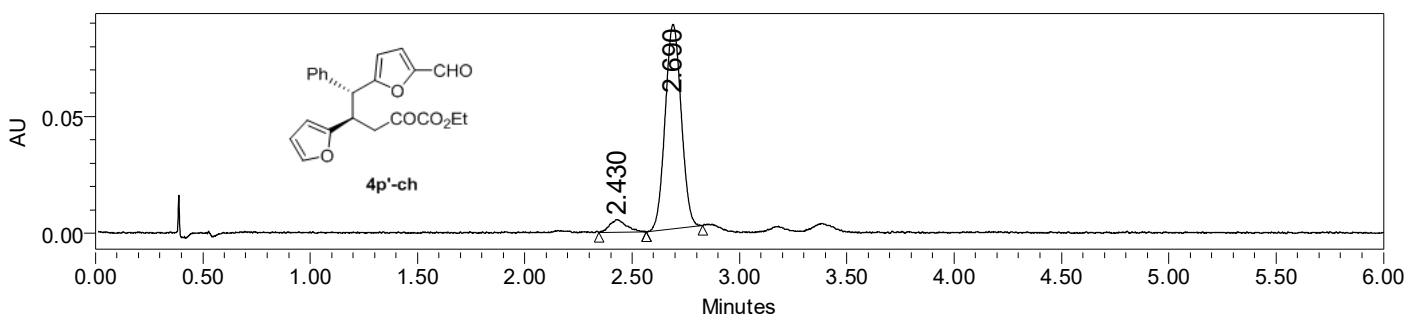**peak information:**

|   | RetTime (min) | Area (μV*s) | Area (%) | Height (μV) |
|---|---------------|-------------|----------|-------------|
| 1 | 2.430         | 29608       | 6.05     | 5409        |
| 2 | 2.690         | 459936      | 93.95    | 87701       |

Sample Name: 4q-rac  
Column: Chiralpak IG-3 90:10

Wave Length: 284.0nm

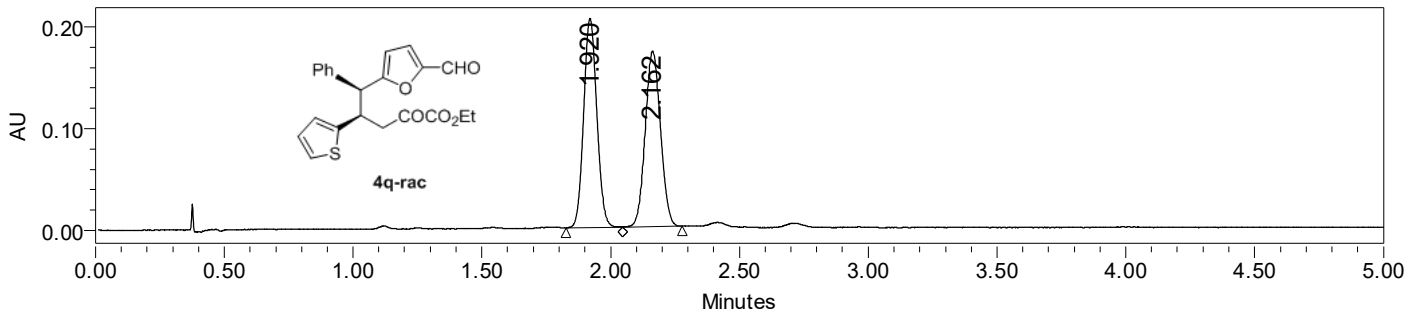**peak information:**

|   | RetTime (min) | Area (μV*s) | Area (%) | Height (μV) |
|---|---------------|-------------|----------|-------------|
| 1 | 1.920         | 733716      | 50.76    | 205626      |
| 2 | 2.162         | 711766      | 49.24    | 172498      |

Sample Name: 4q-ch  
Column: Chiralpak IG-3 90:10

Wave Length: 284.0nm

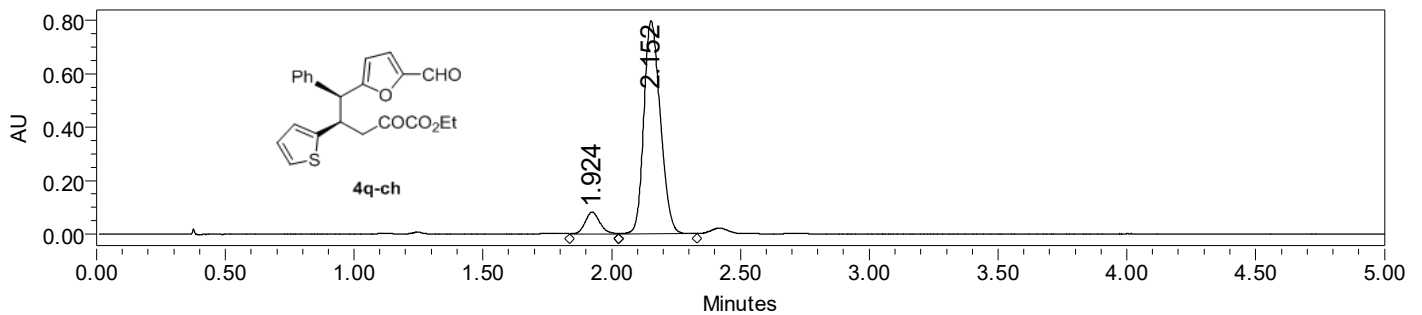**peak information:**

|   | RetTime (min) | Area (μV*s) | Area (%) | Height (μV) |
|---|---------------|-------------|----------|-------------|
| 1 | 1.924         | 320559      | 8.30     | 81408       |
| 2 | 2.152         | 3539937     | 91.70    | 797484      |

Sample Name: 4q'-rac  
Column: Chiralpak IG-3 90:10

Wave Length: 283.0nm

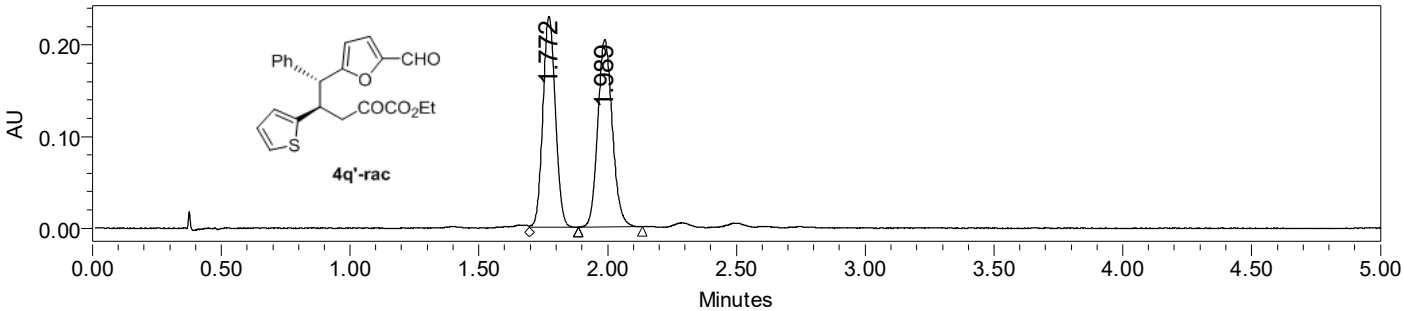

peak information:

|   | RetTime (min) | Area (μV*s) | Area (%) | Height (μV) |
|---|---------------|-------------|----------|-------------|
| 1 | 1.772         | 774565      | 49.12    | 230355      |
| 2 | 1.989         | 802358      | 50.88    | 204655      |

Sample Name: 4q'-ch  
Column: Chiralpak IG-3 90:10

Wave Length: 283.0nm

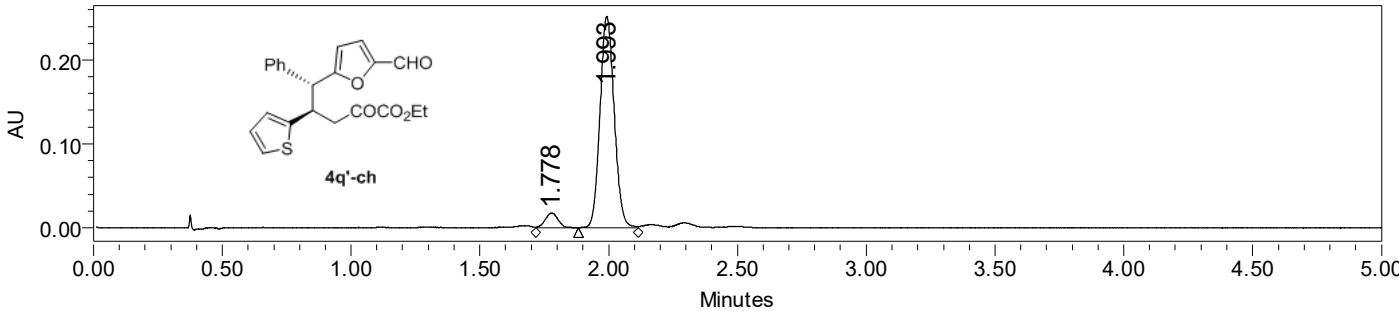

peak information:

|   | RetTime (min) | Area (μV*s) | Area (%) | Height (μV) |
|---|---------------|-------------|----------|-------------|
| 1 | 1.778         | 59669       | 5.84     | 17643       |
| 2 | 1.993         | 961352      | 94.16    | 251955      |

Sample Name: 5-rac

Wave Length: 282.0nm

Column: Trefoil TM CEL2 98:2

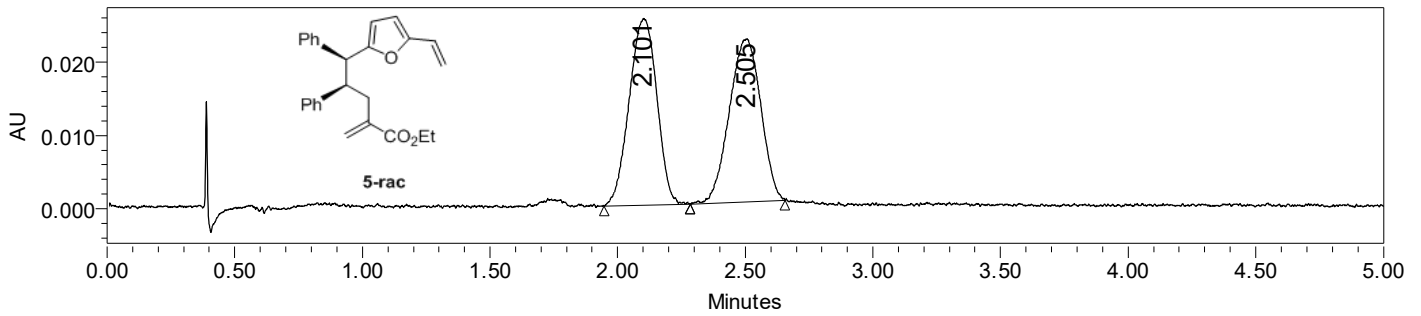**peak information:**

|   | RetTime (min) | Area (μV*s) | Area (%) | Height (μV) |
|---|---------------|-------------|----------|-------------|
| 1 | 2.101         | 191760      | 50.20    | 25448       |
| 2 | 2.505         | 190201      | 49.80    | 22179       |

Sample Name: 5-ch

Wave Length: 273.0nm

Column: Trefoil TM CEL2 98:2

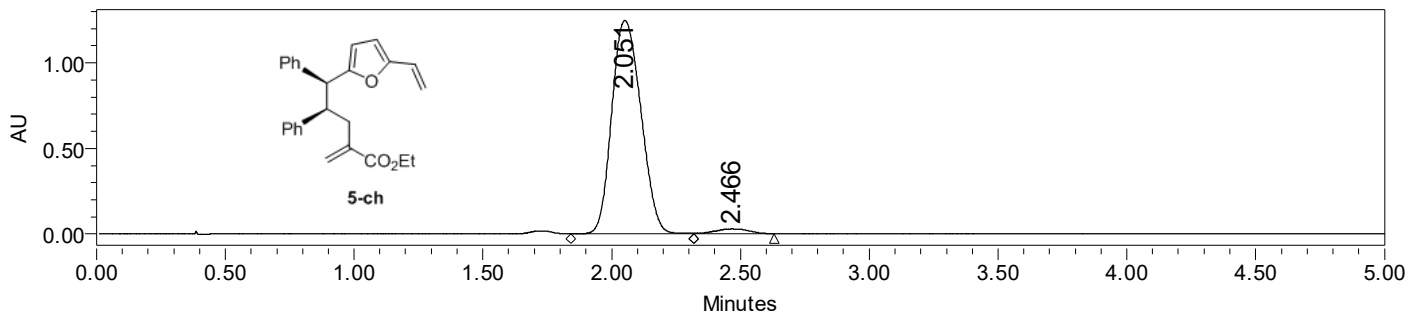**peak information:**

|   | RetTime (min) | Area (μV*s) | Area (%) | Height (μV) |
|---|---------------|-------------|----------|-------------|
| 1 | 2.051         | 9807075     | 97.38    | 1248744     |
| 2 | 2.466         | 264341      | 2.62     | 29050       |

Sample Name: 6-rac Wave Length: 280.0nm  
Column: Chiralpak IG-3 90:10

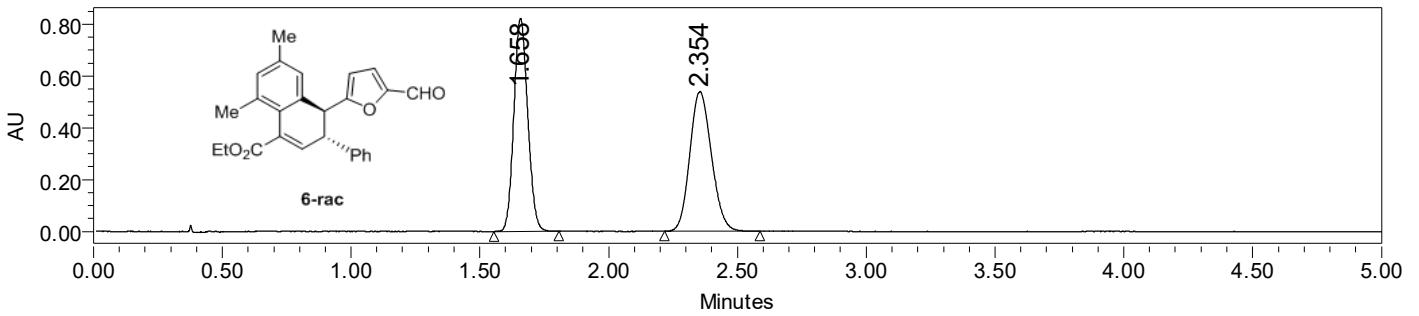**peak information:**

|   | RetTime (min) | Area (μV*s) | Area (%) | Height (μV) |
|---|---------------|-------------|----------|-------------|
| 1 | 1.658         | 3072353     | 49.27    | 821620      |
| 2 | 2.354         | 3163181     | 50.73    | 538987      |

Sample Name: 6-ch Wave Length: 280.0nm  
Column: Chiralpak IG-3 90:10

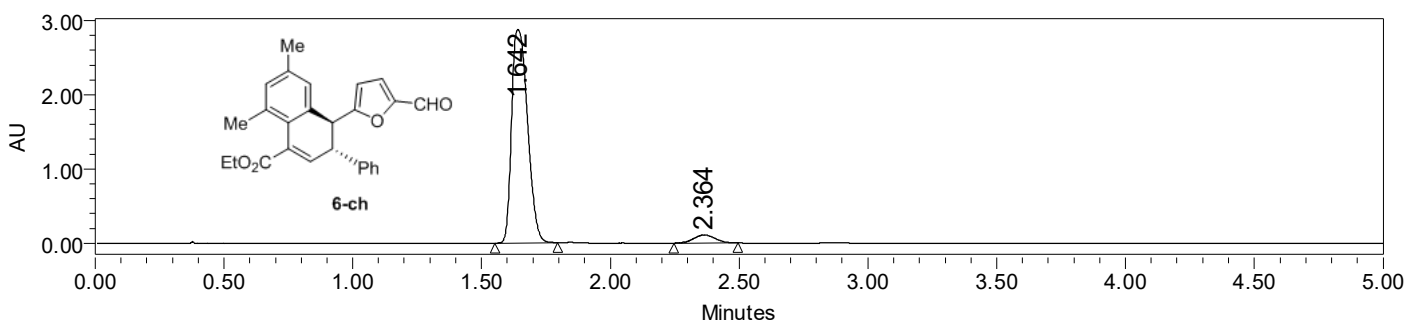**peak information:**

|   | RetTime (min) | Area (μV*s) | Area (%) | Height (μV) |
|---|---------------|-------------|----------|-------------|
| 1 | 1.642         | 12317296    | 95.11    | 2878313     |
| 2 | 2.364         | 633407      | 4.89     | 109975      |

Sample Name: c-rac

Wave Length: 212.0nm

Column: Chiralpak AD-3 95:5

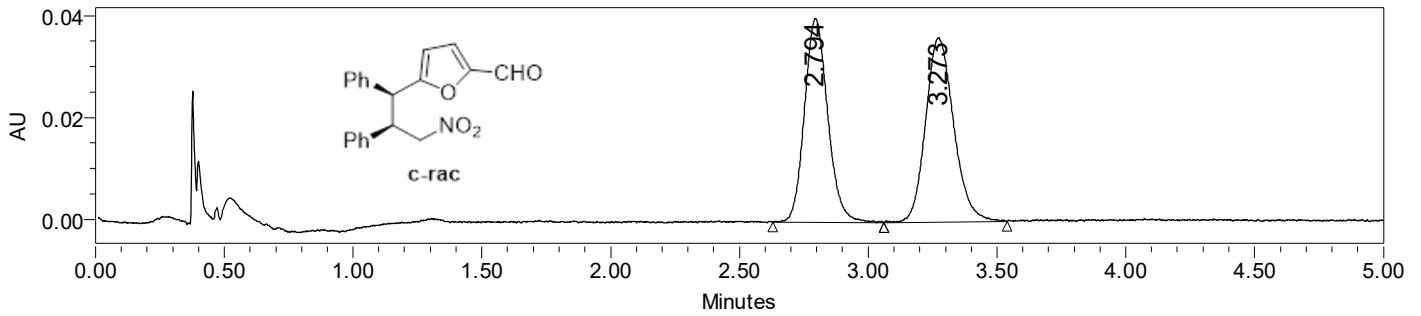

## peak information:

|   | RetTime (min) | Area (μV*s) | Area (%) | Height (μV) |
|---|---------------|-------------|----------|-------------|
| 1 | 2.794         | 252035      | 47.89    | 40015       |
| 2 | 3.273         | 274210      | 52.11    | 36175       |

Sample Name: c-ch

Wave Length: 212.0nm

Column: Chiralpak AD-3 95:5

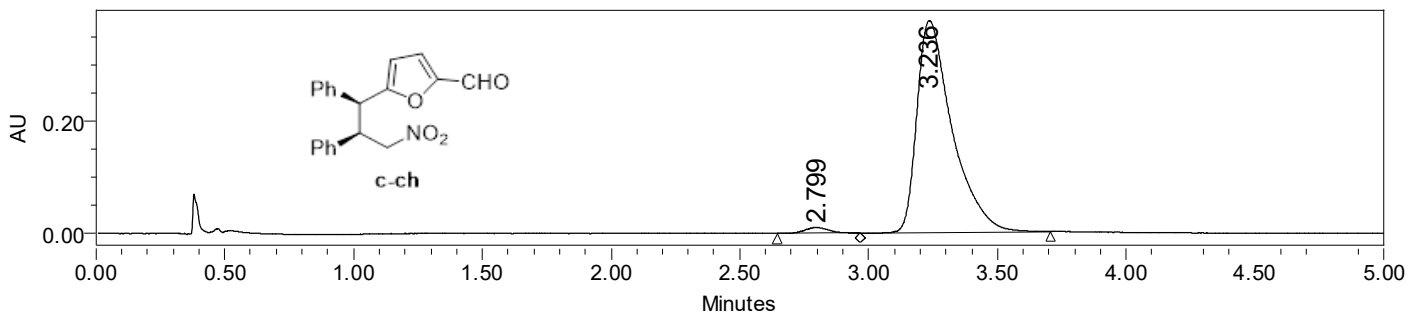

## peak information:

|   | RetTime (min) | Area (μV*s) | Area (%) | Height (μV) |
|---|---------------|-------------|----------|-------------|
| 1 | 2.799         | 63533       | 1.76     | 10075       |
| 2 | 3.236         | 3556140     | 98.24    | 375589      |

Sample Name: c'-rac Wave Length: 219.4nm  
 Column: Chiralpak IG-3 95:5

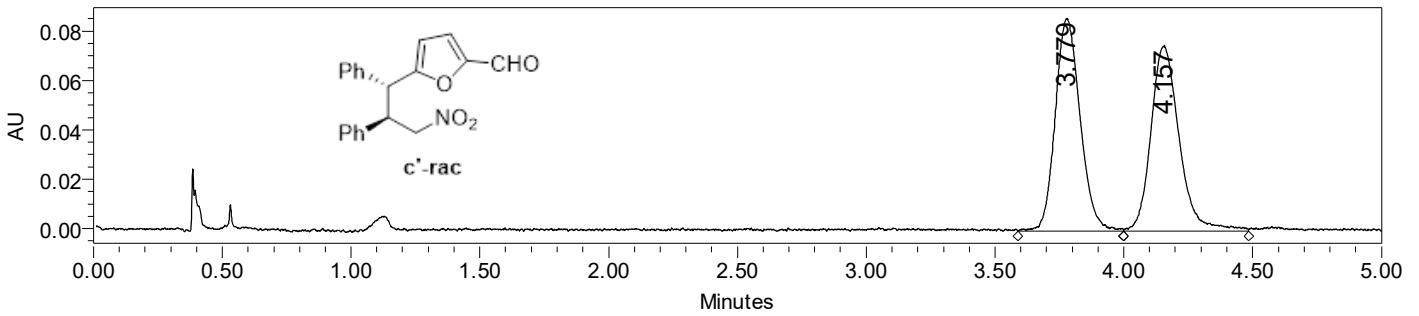

peak information:

|   | RetTime (min) | Area (μV*s) | Area (%) | Height (μV) |
|---|---------------|-------------|----------|-------------|
| 1 | 3.779         | 581636      | 50.12    | 86303       |
| 2 | 4.157         | 578821      | 49.88    | 75236       |

Sample Name: c'-ch Wave Length: 212.0nm  
 Column: Chiralpak IG-3 95:5

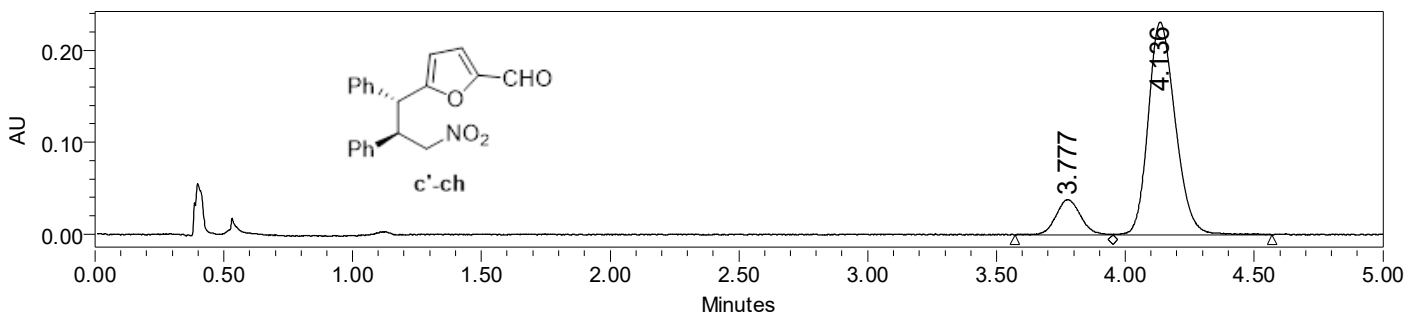

peak information:

|   | RetTime (min) | Area (μV*s) | Area (%) | Height (μV) |
|---|---------------|-------------|----------|-------------|
| 1 | 3.777         | 255312      | 13.04    | 38277       |
| 2 | 4.136         | 1702002     | 86.96    | 231069      |
